# Supplementary material for: PRIMED: PRIMEr Database for Deleting and Tagging All Fission and Budding Yeast Genes Developed Using the Open-Source Genome Retrieval Script (GRS)
Source: PLoS One. 2015 Feb 2;10(2):e0116657. doi: 10.1371/journal.pone.0116657 (PMC4314071; doi:10.1371/journal.pone.0116657)
Supplement: S5 Table — (XLSX) [file pone.0116657.s008.xlsx]

## Sheet: CDS
Species: Saccharomyces cerevisiae
Strain: W303
Systematic name	Common name	Chromosome	Start	End	Strand	Forward deletion	Forward tagging	Reverse deletion	Forward deletion pFA6a	Forward tagging pFA6a	Reverse pFA6a	Overlapping gene	Overlapping gene	Overlapping CDS	Overlapping CDS	Overlapping ncRNA	Overlapping ncRNA
YAL069W	YAL069W	1	974	1307	+	NNNNNNNNNNNNNNNNNNNNNNNNNNNNNNNNNNNNNNNNNNNNNNNNNN	NNNNNNNNNNNNNNNNNNNNNNNNNNNNNNNNNNNNNNNNNNNNNNNNNN	NNNNNNNNNNNNNNNNNNNNNNNNNNNNNNNNNNNNNNNNNNNNNNNNNN	NNNNNNNNNNNNNNNNNNNNNNNNNNNNNNNNNNNNNNNNNNNNNNNATGCGGATCCCCGGGTTAATTAA	NNNNNNNNNNNNNNNNNNNNNNNNNNNNNNNNNNNNNNNNNNNNNNNNNNCGGATCCCCGGGTTAATTAA	NNNNNNNNNNNNNNNNNNNNNNNNNNNNNNNNNNNNNNNNNNNNNNNNNNGAATTCGAGCTCGTTTAAAC	1	YAL068W-A	1	YAL068W-A	0
YAL068W-A	YAL068W-A	1	1196	2974	+	NNNNNNNNNNNNNNNNNNNNNNNNNNNNNNNNNNNNNNNNNNNNNNNNNN	NNNNNNNNNNNNNNNNNNNNNNNNNNNNNNNNNNNNNNNNNNNNNNNNNN	NNNNNNNNNNNNNNNNNNNNNNNNNNNNNNNNNNNNNNNNNNNNNNNNNN	NNNNNNNNNNNNNNNNNNNNNNNNNNNNNNNNNNNNNNNNNNNNNNNATGCGGATCCCCGGGTTAATTAA	NNNNNNNNNNNNNNNNNNNNNNNNNNNNNNNNNNNNNNNNNNNNNNNNNNCGGATCCCCGGGTTAATTAA	NNNNNNNNNNNNNNNNNNNNNNNNNNNNNNNNNNNNNNNNNNNNNNNNNNGAATTCGAGCTCGTTTAAAC	1	YAL069W	1	YAL069W	0
YAL068C	PAU8	1	3989	4351	-	CCTTTCCTGTTAAGCTTATATCAGCACTAACAAACAAAACAAATACAATG	CAGCCATCTCCAGTGCTCTATCCAAGGACGGTATCTACACTATCGCAAAC	AATTTTCAATTTCTATGGAAACCCGTTCGTAAAATTGGCGTTTGTCTCTA	CCTTTCCTGTTAAGCTTATATCAGCACTAACAAACAAAACAAATACAATGCGGATCCCCGGGTTAATTAA	CAGCCATCTCCAGTGCTCTATCCAAGGACGGTATCTACACTATCGCAAACCGGATCCCCGGGTTAATTAA	AATTTTCAATTTCTATGGAAACCCGTTCGTAAAATTGGCGTTTGTCTCTAGAATTCGAGCTCGTTTAAAC	0		0		0
YAL067W-A	YAL067W-A	1	4662	4889	+	TACTGTTTTATGGCGCTTATGTGTATTCGTATGCGCAGAATGTGGGAATG	ATCTCTTGAATTCGTACAACATTAAACGTGTGTTGGGAGTCGTATACTGT	CGTAATTGCACCAAGGCATTTGCCGAGAGTTCACAAGTTTACAGACCCTA	TACTGTTTTATGGCGCTTATGTGTATTCGTATGCGCAGAATGTGGGAATGCGGATCCCCGGGTTAATTAA	ATCTCTTGAATTCGTACAACATTAAACGTGTGTTGGGAGTCGTATACTGTCGGATCCCCGGGTTAATTAA	CGTAATTGCACCAAGGCATTTGCCGAGAGTTCACAAGTTTACAGACCCTAGAATTCGAGCTCGTTTAAAC	0		0		0
YAL067C	SEO1	1	9418	11199	-	GTTAAAAAAAATTACAAAGAGAACTACTGCATATATAAATAACATACATG	AAAAGCCAACGTCAAAAGACGTTGAAACCTTATCAGTATCTGATGAAAAA	TGTGCGAATTTTGTGTTAAAGCTGGATGATGAGAAATTATTCTCGTATTA	GTTAAAAAAAATTACAAAGAGAACTACTGCATATATAAATAACATACATGCGGATCCCCGGGTTAATTAA	AAAAGCCAACGTCAAAAGACGTTGAAACCTTATCAGTATCTGATGAAAAACGGATCCCCGGGTTAATTAA	TGTGCGAATTTTGTGTTAAAGCTGGATGATGAGAAATTATTCTCGTATTAGAATTCGAGCTCGTTTAAAC	0		0		0
YAL066W	YAL066W	1	12274	12582	+	ATGATATAATAACGTTATACGGATAACTTTATTTCAAAAGCACCATCATG	TCCAAACAAAAATGCTTGAAAAGCATACAGCTTCCGATACATCATGTATA	AGGCGAAACGGTTATACATAAATTCAAAATTTTTGTACTGTGATTTTCTA	ATGATATAATAACGTTATACGGATAACTTTATTTCAAAAGCACCATCATGCGGATCCCCGGGTTAATTAA	TCCAAACAAAAATGCTTGAAAAGCATACAGCTTCCGATACATCATGTATACGGATCCCCGGGTTAATTAA	AGGCGAAACGGTTATACATAAATTCAAAATTTTTGTACTGTGATTTTCTAGAATTCGAGCTCGTTTAAAC	0		0		0
YAL065C	YAL065C	1	13748	14134	-	CAACATGGAGGCCACAGACTACGAATGAAGAGTCTGTCAGCTCTAAAATG	ATAATGGCATAAGTGTTTTTATTTCCACCGTATTGCTGGCAATCGTATGG	CTATAAGCGTGATGATAGAATTATTAATATAAGATGATGCCGTGCGTTTA	CAACATGGAGGCCACAGACTACGAATGAAGAGTCTGTCAGCTCTAAAATGCGGATCCCCGGGTTAATTAA	ATAATGGCATAAGTGTTTTTATTTCCACCGTATTGCTGGCAATCGTATGGCGGATCCCCGGGTTAATTAA	CTATAAGCGTGATGATAGAATTATTAATATAAGATGATGCCGTGCGTTTAGAATTCGAGCTCGTTTAAAC	0		0		0
YAL064W-B	YAL064W-B	1	14229	14651	+	GATAGACCGTAACAACATCATTCACAGTAGCCGTGGCCGTCGAAACAATG	NNNNNNNNNNNNNNNNNNNNNNNNNNNNNNNNNNNNNNTCAGTGCACACA	AAAACGAGCGAACAAACCACTTTGGTTACCGTGACATCCTGCGAATCTCA	GATAGACCGTAACAACATCATTCACAGTAGCCGTGGCCGTCGAAACAATGCGGATCCCCGGGTTAATTAA	NNNNNNNNNNNNNNNNNNNNNNNNNNNNNNNNNNNNNNTCAGTGCACACACGGATCCCCGGGTTAATTAA	AAAACGAGCGAACAAACCACTTTGGTTACCGTGACATCCTGCGAATCTCAGAATTCGAGCTCGTTTAAAC	0		0		0
YAL064C-A	YAL064C-A	1	18563	18943	-	CTGATTTACTTGGTTTCTATACTATCCCAAAAAACGCTACTCTAGAAATG	GGCACGTTTACTCTTTTGACGATGACCTAACAGCCCAATTGTACTATCCC	NNNNNNNNNNNNNNNNNNNNNNNNNNNNNNNNNTATGTTTTGAAGGATCA	CTGATTTACTTGGTTTCTATACTATCCCAAAAAACGCTACTCTAGAAATGCGGATCCCCGGGTTAATTAA	GGCACGTTTACTCTTTTGACGATGACCTAACAGCCCAATTGTACTATCCCCGGATCCCCGGGTTAATTAA	NNNNNNNNNNNNNNNNNNNNNNNNNNNNNNNNNTATGTTTTGAAGGATCAGAATTCGAGCTCGTTTAAAC	0		0		0
YAL064W	YAL064W	1	27355	27681	+	NNNNNNNNNNNNNNNNNNNNNNNNNNNNNNNNNNNNNNNNNNNNNNNNNN	AATCAGTACTTGTACCTAATTTTGGTTTTCTCATATTGAATAGCGAACCA	CCATCCAAGTTGCGGGCTCTGGATTTATGTGGCCTTAAATTTTGGACCTA	NNNNNNNNNNNNNNNNNNNNNNNNNNNNNNNNNNNNNNNNNNNNNNNATGCGGATCCCCGGGTTAATTAA	AATCAGTACTTGTACCTAATTTTGGTTTTCTCATATTGAATAGCGAACCACGGATCCCCGGGTTAATTAA	CCATCCAAGTTGCGGGCTCTGGATTTATGTGGCCTTAAATTTTGGACCTAGAATTCGAGCTCGTTTAAAC	0		0		0
YAL063C-A	YAL063C-A	1	28228	28518	-	ACTTTCCTTTGCTTTTTTTCTGGATCTCATGAGGTCCCACTGTATGTATG	AAGGGAAATTCATATCTCTATGTAAAAATACCATTATTTCCTCTTCTGTT	TGAAATGCAAAAGTTGATAATGTAATATGAAAATTAAGGACAGCATATTA	ACTTTCCTTTGCTTTTTTTCTGGATCTCATGAGGTCCCACTGTATGTATGCGGATCCCCGGGTTAATTAA	AAGGGAAATTCATATCTCTATGTAAAAATACCATTATTTCCTCTTCTGTTCGGATCCCCGGGTTAATTAA	TGAAATGCAAAAGTTGATAATGTAATATGAAAATTAAGGACAGCATATTAGAATTCGAGCTCGTTTAAAC	0		0		0
YAL063C	FLO9	1	29834	34826	-	NNNNNNNNNNNNNNNNNNNNNNNNNNNNNNNNNNNNNNNNNNNNNNNNNN	CCGGTAGTGGTTTAAGTGTCTTCATTGCGTCCTTATTGCTGGCAATTATT	TTAGCAAAGAAAAGATACACAGATACGTAAAAAGAACGCGAATTTTATTA	NNNNNNNNNNNNNNNNNNNNNNNNNNNNNNNNNNNNNNNNNNNNNNNATGCGGATCCCCGGGTTAATTAA	CCGGTAGTGGTTTAAGTGTCTTCATTGCGTCCTTATTGCTGGCAATTATTCGGATCCCCGGGTTAATTAA	TTAGCAAAGAAAAGATACACAGATACGTAAAAAGAACGCGAATTTTATTAGAATTCGAGCTCGTTTAAAC	0		0		0
YAL062W	GDH3,FUN51	1	38437	39810	+	TAGGGAAGTAGCAACAGTCACCGAAAAGAAAAGGTAAAAAGTAAAAAATG	CCAGCTTCGTCATGGTGGCTGACGCAATGCTTGACCAGGGAGACGTTTTT	ACTACATACACAGATAGTTACGAACAAAAAGAAAATAGCGCTTACGGCTA	TAGGGAAGTAGCAACAGTCACCGAAAAGAAAAGGTAAAAAGTAAAAAATGCGGATCCCCGGGTTAATTAA	CCAGCTTCGTCATGGTGGCTGACGCAATGCTTGACCAGGGAGACGTTTTTCGGATCCCCGGGTTAATTAA	ACTACATACACAGATAGTTACGAACAAAAAGAAAATAGCGCTTACGGCTAGAATTCGAGCTCGTTTAAAC	0		0		0
YAL061W	BDH2	1	40318	41571	+	AACAACAGCAATAAGAATAACAATAAATTCATTGAACATATTTCAGAATG	ATCAAGAAAGACTACGAGAATCAATAAACGAGGCTAAACTGCGTCACACA	CAAGAAGACCGCGGGATTAACACGAGAACGTGAGTACTCAATCACAATCA	AACAACAGCAATAAGAATAACAATAAATTCATTGAACATATTTCAGAATGCGGATCCCCGGGTTAATTAA	ATCAAGAAAGACTACGAGAATCAATAAACGAGGCTAAACTGCGTCACACACGGATCCCCGGGTTAATTAA	CAAGAAGACCGCGGGATTAACACGAGAACGTGAGTACTCAATCACAATCAGAATTCGAGCTCGTTTAAAC	0		0		0
YAL060W	BDH1	1	42025	43173	+	AGTCAGAAAAAAAAAAAAAAAGGAACTAAAAAAAGTTTTAATTAATTATG	AATCCAACGTTAAGATTCTATTGACGCCTAACAATCACGGTGAAATGAAG	TAGATACTACAAATGAGCCGCGAGGGGCCCCAAATATTATTTTGTCATTA	AGTCAGAAAAAAAAAAAAAAAGGAACTAAAAAAAGTTTTAATTAATTATGCGGATCCCCGGGTTAATTAA	AATCCAACGTTAAGATTCTATTGACGCCTAACAATCACGGTGAAATGAAGCGGATCCCCGGGTTAATTAA	TAGATACTACAAATGAGCCGCGAGGGGCCCCAAATATTATTTTGTCATTAGAATTCGAGCTCGTTTAAAC	0		0		0
YAL059C-A	YAL059C-A	1	43366	43788	-	TTATAGTCTCATTGGTGCTATCCCAGCCAGCCTTTCTTGTATTTTGAATG	TCAAGGAAAAAACTACCTTTTGTCGTCTTTGTTCCCACATTCAATACTTC	TTATTCAACTTGGCGATGAGCTGAAAATTTTTTTGGTTAAGGACCCTTTA	TTATAGTCTCATTGGTGCTATCCCAGCCAGCCTTTCTTGTATTTTGAATGCGGATCCCCGGGTTAATTAA	TCAAGGAAAAAACTACCTTTTGTCGTCTTTGTTCCCACATTCAATACTTCCGGATCCCCGGGTTAATTAA	TTATTCAACTTGGCGATGAGCTGAAAATTTTTTTGGTTAAGGACCCTTTAGAATTCGAGCTCGTTTAAAC	1	YAL059W	1	YAL059W	0
YAL059W	ECM1	1	43379	44017	+	CGATGAGCTGAAAATTTTTTTGGTTAAGGACCCTTTAGAAGTATTGAATG	AGAAGACTCCTACAAATAGATTCGGTGTCCTGCCAGACGATGTTGAAGAA	TGCGTACAAGAATCGTGTATTCCTAGGACCTTTCATATGAAAATTTTCTA	CGATGAGCTGAAAATTTTTTTGGTTAAGGACCCTTTAGAAGTATTGAATGCGGATCCCCGGGTTAATTAA	AGAAGACTCCTACAAATAGATTCGGTGTCCTGCCAGACGATGTTGAAGAACGGATCCCCGGGTTAATTAA	TGCGTACAAGAATCGTGTATTCCTAGGACCTTTCATATGAAAATTTTCTAGAATTCGAGCTCGTTTAAAC	1	YAL059C-A	1	YAL059C-A	0
YAL058W	CNE1,FUN48	1	44334	45842	+	ACGGCAACGCATTTCTAATATAGATAACGGCCACACAAAGTAGTACTATG	CGGCCGTCGTGCTCTTGACGACGTCGGTTCTTTGTTGTGTAGTATTTACA	GTTGTGGTGCAATTATTGAGACCATGTTATAAACTAACACTTGTCCACTA	ACGGCAACGCATTTCTAATATAGATAACGGCCACACAAAGTAGTACTATGCGGATCCCCGGGTTAATTAA	CGGCCGTCGTGCTCTTGACGACGTCGGTTCTTTGTTGTGTAGTATTTACACGGATCCCCGGGTTAATTAA	GTTGTGGTGCAATTATTGAGACCATGTTATAAACTAACACTTGTCCACTAGAATTCGAGCTCGTTTAAAC	1	YAL056C-A	1	YAL056C-A	0
YAL056C-A	YAL056C-A	1	45566	45916	-	AGTATTATACATCATCATTTAATCATGATGATAATATTGATACTATAATG	GCCAAGTCTTATTCCCAATAATTTGCGCCTCTGTTACATTTTTACCAACA	ATCCTCGAGTTTTGGAGTGGATCTCCAAACATGTTGATAAGCAACATTTA	AGTATTATACATCATCATTTAATCATGATGATAATATTGATACTATAATGCGGATCCCCGGGTTAATTAA	GCCAAGTCTTATTCCCAATAATTTGCGCCTCTGTTACATTTTTACCAACACGGATCCCCGGGTTAATTAA	ATCCTCGAGTTTTGGAGTGGATCTCCAAACATGTTGATAAGCAACATTTAGAATTCGAGCTCGTTTAAAC	1	YAL058W	1	YAL058W	0
YAL056W	GPB2,KRH1	1	46129	48771	+	ATTGTGATTCATTGGCAGGTCCATTGTCGCATTACTAAATCATAGGCATG	TACATGGTACCATAACGAAAAGTATTTTTCCTAGCGTAAATCCTAGTGCA	TACTACTAAACAAAGTTTACAAAGTGAAAGCATTGAAAACTGCCTTTTTA	ATTGTGATTCATTGGCAGGTCCATTGTCGCATTACTAAATCATAGGCATGCGGATCCCCGGGTTAATTAA	TACATGGTACCATAACGAAAAGTATTTTTCCTAGCGTAAATCCTAGTGCACGGATCCCCGGGTTAATTAA	TACTACTAAACAAAGTTTACAAAGTGAAAGCATTGAAAACTGCCTTTTTAGAATTCGAGCTCGTTTAAAC	0		0		0
YAL055W	PEX22,YAF5	1	49047	49589	+	AGACAATGAAACAATAATGAAGAATAAAGAAGAAGAAGATATAAAACATG	TTGTTGTTGATAGCGATGTAGAGGATGTGCTGATTGACACTTTATGCAAT	ATAATTATTTATTCTTTACATACTGTTACAAGAAACTCTTTTCTACATTA	AGACAATGAAACAATAATGAAGAATAAAGAAGAAGAAGATATAAAACATGCGGATCCCCGGGTTAATTAA	TTGTTGTTGATAGCGATGTAGAGGATGTGCTGATTGACACTTTATGCAATCGGATCCCCGGGTTAATTAA	ATAATTATTTATTCTTTACATACTGTTACAAGAAACTCTTTTCTACATTAGAATTCGAGCTCGTTTAAAC	0		0		0
YAL054C	ACS1,FUN44	1	49751	51892	-	AAAACCAAACATATCAAAACTACTAGAAAGACATTGCCCACTGTGCTATG	CATTGTCAAACCCTGGCATTGTTAGACATCTAATTGATTCGGTCAAGTTG	ACACGAAAAAAAAAAAGTCGTCAATATAAAAAGGAAAGAAATCATCATTA	AAAACCAAACATATCAAAACTACTAGAAAGACATTGCCCACTGTGCTATGCGGATCCCCGGGTTAATTAA	CATTGTCAAACCCTGGCATTGTTAGACATCTAATTGATTCGGTCAAGTTGCGGATCCCCGGGTTAATTAA	ACACGAAAAAAAAAAAGTCGTCAATATAAAAAGGAAAGAAATCATCATTAGAATTCGAGCTCGTTTAAAC	0		0		0
YAL053W	FLC2,HUF2	1	52768	55119	+	TCTGTTTCATTACGATTATATTGACGTGATAAAAAGATTATATAGCCATG	TTAACAACAACGGCAGCAACGAAAACGCCCGCAACAACAACCCATATTTG	CCTTAAATATTTATATAATAAGTTGTTACATGTGAGTATATATTGGATTA	TCTGTTTCATTACGATTATATTGACGTGATAAAAAGATTATATAGCCATGCGGATCCCCGGGTTAATTAA	TTAACAACAACGGCAGCAACGAAAACGCCCGCAACAACAACCCATATTTGCGGATCCCCGGGTTAATTAA	CCTTAAATATTTATATAATAAGTTGTTACATGTGAGTATATATTGGATTAGAATTCGAGCTCGTTTAAAC	0		0		0
YAL051W	OAF1,YAF1	1	55433	58576	+	TATTTTGTGTTAGAAGCAGGTTAATAATAGATTAGGTTGCGTAAGTCATG	GAGGTTTGGATTTATTTGATTATGACTTTTTGTTTGGCAATGACTTTGCT	TTAATTAATTGATGAAATGAATAGGTAGGAGTTTGGAAAGAAAATTTTTA	TATTTTGTGTTAGAAGCAGGTTAATAATAGATTAGGTTGCGTAAGTCATGCGGATCCCCGGGTTAATTAA	GAGGTTTGGATTTATTTGATTATGACTTTTTGTTTGGCAATGACTTTGCTCGGATCCCCGGGTTAATTAA	TTAATTAATTGATGAAATGAATAGGTAGGAGTTTGGAAAGAAAATTTTTAGAATTCGAGCTCGTTTAAAC	0		0		0
YAL049C	YAL049C	1	58724	59464	-	GTTTTCCACTACGTCTAACTACAGCAGAACAAAATTATTTCAATCAAATG	AGAAAGTCTTGCTCGACCAAATATACTGGTTCAATCATTTTTCGAATGTT	TATATATATATGTATATAACGGTTAACGTAAGAAGAGCTCTTCCCTCTTA	GTTTTCCACTACGTCTAACTACAGCAGAACAAAATTATTTCAATCAAATGCGGATCCCCGGGTTAATTAA	AGAAAGTCTTGCTCGACCAAATATACTGGTTCAATCATTTTTCGAATGTTCGGATCCCCGGGTTAATTAA	TATATATATATGTATATAACGGTTAACGTAAGAAGAGCTCTTCCCTCTTAGAATTCGAGCTCGTTTAAAC	0		0		0
YAL048C	GEM1,GON1	1	59670	61658	-	AAAACAAAAATAGCGGACTTCTAAATACTAATGTGTTGAACAACACAATG	TATGTTCCTTTACGTTAATGAAATTATTCAAATCATCAAAATTCTCAAAA	TATCATAGAAATGCAACACTTCCCTAATATAGAAATTTGGGCATTAATTA	AAAACAAAAATAGCGGACTTCTAAATACTAATGTGTTGAACAACACAATGCGGATCCCCGGGTTAATTAA	TATGTTCCTTTACGTTAATGAAATTATTCAAATCATCAAAATTCTCAAAACGGATCCCCGGGTTAATTAA	TATCATAGAAATGCAACACTTCCCTAATATAGAAATTTGGGCATTAATTAGAATTCGAGCTCGTTTAAAC	1	YAL047W-A	1	YAL047W-A	0
YAL047W-A	YAL047W-A	1	61453	61782	+	ACACAAGCCAAATTACGTCGGCGGACTTCAACTCATGGTCTAAAGCTATG	AATTTCATTCTTGTTTTGAGGGTAAACCACTATACCAAATGTTGAAGATC	TAATGTAACACTCAGTCACTCTCTAGCAACATATTTGATCGATACCTTTA	ACACAAGCCAAATTACGTCGGCGGACTTCAACTCATGGTCTAAAGCTATGCGGATCCCCGGGTTAATTAA	AATTTCATTCTTGTTTTGAGGGTAAACCACTATACCAAATGTTGAAGATCCGGATCCCCGGGTTAATTAA	TAATGTAACACTCAGTCACTCTCTAGCAACATATTTGATCGATACCTTTAGAATTCGAGCTCGTTTAAAC	1	YAL048C	1	YAL048C	0
YAL047C	SPC72,LDB4	1	61858	63726	-	CACTAATATCAAAAAACTAAGCAAACAACATAAGGAAAGTTATAGCCATG	AAAATGAGTCATTGAGATCGAAACTTTTCAACCTATCAATCAACAATCCC	GTGACTGAGTGTTACATTAAATATATTTATATATAAACGTATGATATTTA	CACTAATATCAAAAAACTAAGCAAACAACATAAGGAAAGTTATAGCCATGCGGATCCCCGGGTTAATTAA	AAAATGAGTCATTGAGATCGAAACTTTTCAACCTATCAATCAACAATCCCCGGATCCCCGGGTTAATTAA	GTGACTGAGTGTTACATTAAATATATTTATATATAAACGTATGATATTTAGAATTCGAGCTCGTTTAAAC	0		0		0
YAL046C	YAL046C	1	63898	64254	-	TGGTCACTGAGAACCATAAAAGCGAAAAGAGAAGGTAAAACATAGAAATG	GCCTACAATTGACCACTAAGAAGTCAACTGGGAAGGGTCCGGCATCATCA	GTAAACTAAAAGTGATACTTACACGAGCTTTTTTGGTTCCAAACTGTTCA	TGGTCACTGAGAACCATAAAAGCGAAAAGAGAAGGTAAAACATAGAAATGCGGATCCCCGGGTTAATTAA	GCCTACAATTGACCACTAAGAAGTCAACTGGGAAGGGTCCGGCATCATCACGGATCCCCGGGTTAATTAA	GTAAACTAAAAGTGATACTTACACGAGCTTTTTTGGTTCCAAACTGTTCAGAATTCGAGCTCGTTTAAAC	0		0		0
YAL045C	YAL045C	1	64357	64665	-	GCTTTGGATTCATACTCCTGTGGGGTCTTTAGTGACAATTGTAAAGCATG	GTGCTCATTGCTCTCTTGAACATTATTCTCTTTCCACTTTCGTTTGCTGC	AACTTATATATGTTCCGGAATGACGAATCAAAAAGAGAATAGCATCGTTA	GCTTTGGATTCATACTCCTGTGGGGTCTTTAGTGACAATTGTAAAGCATGCGGATCCCCGGGTTAATTAA	GTGCTCATTGCTCTCTTGAACATTATTCTCTTTCCACTTTCGTTTGCTGCCGGATCCCCGGGTTAATTAA	AACTTATATATGTTCCGGAATGACGAATCAAAAAGAGAATAGCATCGTTAGAATTCGAGCTCGTTTAAAC	1	YAL044W-A	1	YAL044W-A	0
YAL044W-A	YAL044W-A	1	64387	64719	+	AAAAGAGAATAGCATCGTTAGCAGCAAACGAAAGTGGAAAGAGAATAATG	CTTTACAATTGTCACTAAAGACCCCACAGGAGTATGAATCCAAAGCGAAA	GGGAAATAAAACAATAAACTCAACGTGTACACTTATGCTTATGCATTCTA	AAAAGAGAATAGCATCGTTAGCAGCAAACGAAAGTGGAAAGAGAATAATGCGGATCCCCGGGTTAATTAA	CTTTACAATTGTCACTAAAGACCCCACAGGAGTATGAATCCAAAGCGAAACGGATCCCCGGGTTAATTAA	GGGAAATAAAACAATAAACTCAACGTGTACACTTATGCTTATGCATTCTAGAATTCGAGCTCGTTTAAAC	1	YAL045C	1	YAL045C	0
YAL044C	GCV3	1	64819	65331	-	TATCTAATGGGAAAGGGAATCTCCACATGAAGCATACCACATCGACAATG	AGGGTCTAATGTCCTTAGAACAGTACGAAAAGACACTGGTTCATGATGAC	TATATATACATATATATGAAATTACTTTACGTACGTATAAGCTTTGTTCA	TATCTAATGGGAAAGGGAATCTCCACATGAAGCATACCACATCGACAATGCGGATCCCCGGGTTAATTAA	AGGGTCTAATGTCCTTAGAACAGTACGAAAAGACACTGGTTCATGATGACCGGATCCCCGGGTTAATTAA	TATATATACATATATATGAAATTACTTTACGTACGTATAAGCTTTGTTCAGAATTCGAGCTCGTTTAAAC	0		0		0
YAL043C	PTA1,FUN39	1	65564	67921	-	ATGGTTAAATCGTGGCAAGAAGCATATAACTACCACTAAGCAGCGCAATG	AAGATGAAGGCTTACACAAGCAGTGCGATTCACTGCTTGACAGGCTAAAA	AGGAAGACCCTACACATGCGTATATATGATGTATGTAATGGTTGTGATCA	ATGGTTAAATCGTGGCAAGAAGCATATAACTACCACTAAGCAGCGCAATGCGGATCCCCGGGTTAATTAA	AAGATGAAGGCTTACACAAGCAGTGCGATTCACTGCTTGACAGGCTAAAACGGATCCCCGGGTTAATTAA	AGGAAGACCCTACACATGCGTATATATGATGTATGTAATGGTTGTGATCAGAATTCGAGCTCGTTTAAAC	0		0		0
YAL042C-A	YAL042C-A	1	68100	68477	-	GGCGACCCTCGCTATTCAACCTAGACATCGTGAACCCTGCGTCAAGAATG	TCACTGTCCTACTCCGCATGTATACGAGACATAAAACTAGCTTTCCTTTA	ACATCAGAACGGCGATTTTCCATCAAGATGGAGTGGAAACCACGCCATTA	GGCGACCCTCGCTATTCAACCTAGACATCGTGAACCCTGCGTCAAGAATGCGGATCCCCGGGTTAATTAA	TCACTGTCCTACTCCGCATGTATACGAGACATAAAACTAGCTTTCCTTTACGGATCCCCGGGTTAATTAA	ACATCAGAACGGCGATTTTCCATCAAGATGGAGTGGAAACCACGCCATTAGAATTCGAGCTCGTTTAAAC	1	YAL042W	1	YAL042W	0
YAL042W	ERV46,FUN9	1	68185	69432	+	GGAGTAGGACAGTGATATAACACACATAGCTAGACACAATAGACATCATG	ACAAGCTATTCTACAAAGCACAGAGATCGATCTGGGGCAAGAAGAGCCAG	ATGTAGTAGTATGTAGAAAGGGCTCTTCCCTATGACAGTCTCTTCCTCTA	GGAGTAGGACAGTGATATAACACACATAGCTAGACACAATAGACATCATGCGGATCCCCGGGTTAATTAA	ACAAGCTATTCTACAAAGCACAGAGATCGATCTGGGGCAAGAAGAGCCAGCGGATCCCCGGGTTAATTAA	ATGTAGTAGTATGTAGAAAGGGCTCTTCCCTATGACAGTCTCTTCCTCTAGAATTCGAGCTCGTTTAAAC	1	YAL042C-A	1	YAL042C-A	0
YAL041W	CDC24,CLS4	1	69709	72273	+	TTGCCTAGCCCTATCAAGACCTGTCTGCTAATCCAACCCGAGAGATCATG	AAGAAATGTTGGCGGAAAACAATGAGAAATTCTTGAACATTCGTCTGTAT	TTTTTTTCTTGAATTATTTAGTATTTGCTGTATACTAGTTTTATTTATCA	TTGCCTAGCCCTATCAAGACCTGTCTGCTAATCCAACCCGAGAGATCATGCGGATCCCCGGGTTAATTAA	AAGAAATGTTGGCGGAAAACAATGAGAAATTCTTGAACATTCGTCTGTATCGGATCCCCGGGTTAATTAA	TTTTTTTCTTGAATTATTTAGTATTTGCTGTATACTAGTTTTATTTATCAGAATTCGAGCTCGTTTAAAC	0		0		0
YAL040C	CLN3,WHI1,FUN10,DAF1	1	72647	74389	-	CCCTTTTACTCTCGTTCAAGACACTGATTTGATACGCTTTCTGTACGATG	CCTCTGTGGATTGTGATTTTAATGATAGTAGCAACCTCAAGAAAACTCGC	GCAAATTTTAATTTATTTGTTGTTAAATGCATTTTTTTTTTGTCGTTTCA	CCCTTTTACTCTCGTTCAAGACACTGATTTGATACGCTTTCTGTACGATGCGGATCCCCGGGTTAATTAA	CCTCTGTGGATTGTGATTTTAATGATAGTAGCAACCTCAAGAAAACTCGCCGGATCCCCGGGTTAATTAA	GCAAATTTTAATTTATTTGTTGTTAAATGCATTTTTTTTTTGTCGTTTCAGAATTCGAGCTCGTTTAAAC	0		0		0
YAL039C	CYC3	1	75585	76394	-	CGAGTAGCACGAATAAAGCAGAGCAAATACAACAGAAACTACAAAAAATG	GTTTCTTGGACCGGATGATCTCGGGTCCGTCCTCTTCGTCCTCCGCCCCT	ATTTCTTACTTGGCTATTTACACGTACTTACGCTGGCTGTATATCATTTA	CGAGTAGCACGAATAAAGCAGAGCAAATACAACAGAAACTACAAAAAATGCGGATCCCCGGGTTAATTAA	GTTTCTTGGACCGGATGATCTCGGGTCCGTCCTCTTCGTCCTCCGCCCCTCGGATCCCCGGGTTAATTAA	ATTTCTTACTTGGCTATTTACACGTACTTACGCTGGCTGTATATCATTTAGAATTCGAGCTCGTTTAAAC	0		0		0
YAL038W	CDC19,PYK1	1	78655	80157	+	GTTTCTATTTACAAGACACCAATCAAAACAAATAAAACATCATCACAATG	GTTTCAAGGCCGGTGCTGGTCACTCCAACACTTTGCAAGTCTCTACCGTT	AATATAATTCAAAAAAATAATATCTTCATTCAATCATGATTCTTTTTTTA	GTTTCTATTTACAAGACACCAATCAAAACAAATAAAACATCATCACAATGCGGATCCCCGGGTTAATTAA	GTTTCAAGGCCGGTGCTGGTCACTCCAACACTTTGCAAGTCTCTACCGTTCGGATCCCCGGGTTAATTAA	AATATAATTCAAAAAAATAATATCTTCATTCAATCATGATTCTTTTTTTAGAATTCGAGCTCGTTTAAAC	1	YAL037C-B	1	YAL037C-B	0
YAL037C-B	YAL037C-B	1	79195	80169	-	TAAAATTTAAAAAATATAATTCAAAAAAATAATATCTTCATTCAATCATG	TCTTCCTTGTCCTTTTCAGACAAAGCTGGCAAATCGACATCGGTACCTGG	TCAAGGCTTTGAACGCCGGTAAGATCTGTTCCCACAAGGGTGTCAACTTA	TAAAATTTAAAAAATATAATTCAAAAAAATAATATCTTCATTCAATCATGCGGATCCCCGGGTTAATTAA	TCTTCCTTGTCCTTTTCAGACAAAGCTGGCAAATCGACATCGGTACCTGGCGGATCCCCGGGTTAATTAA	TCAAGGCTTTGAACGCCGGTAAGATCTGTTCCCACAAGGGTGTCAACTTAGAATTCGAGCTCGTTTAAAC	1	YAL038W	1	YAL038W	0
YAL037C-A	YAL037C-A	1	80295	80387	-	AGATTATCTTGCGATGGGAGGGATCAAATTTAGCAAATTTTGACTCTATG	TGACGACAATTGGAGACAAAAAGGTTAACAATAACATAATACTCTTTTTA	ATAAAGATTTATAAGTTACTTAAATAACATACATTTTATAAGGTATTCTA	AGATTATCTTGCGATGGGAGGGATCAAATTTAGCAAATTTTGACTCTATGCGGATCCCCGGGTTAATTAA	TGACGACAATTGGAGACAAAAAGGTTAACAATAACATAATACTCTTTTTACGGATCCCCGGGTTAATTAA	ATAAAGATTTATAAGTTACTTAAATAACATACATTTTATAAGGTATTCTAGAATTCGAGCTCGTTTAAAC	0		0		0
YAL037W	YAL037W	1	80889	81692	+	GACATAGTGCCAATAATTACGCAAAAAGCAAAGGAAATAACACTGCTATG	CTACGATCGATAACAGAATGCTTATGGGTACCACAAAGCGAGGTCGCTTT	AAAAAAACAGTCGTAATAATTAAAAATGTTATGCTACCGAGGGCTCTTCA	GACATAGTGCCAATAATTACGCAAAAAGCAAAGGAAATAACACTGCTATGCGGATCCCCGGGTTAATTAA	CTACGATCGATAACAGAATGCTTATGGGTACCACAAAGCGAGGTCGCTTTCGGATCCCCGGGTTAATTAA	AAAAAAACAGTCGTAATAATTAAAAATGTTATGCTACCGAGGGCTCTTCAGAATTCGAGCTCGTTTAAAC	0		0		0
YAL036C	RBG1,FUN11	1	81912	83021	-	GAAGCTAGATGCAGTAGGTGCAAGCGTAGAGTTGTTGATTGAGCAAAATG	GGTTGAGTCACATTTTGGAAGACGAAGATGTTGTTACCATCTTGAAAAAG	ATTATTTTTTTTTTTTTTCATTTCTTATATTATTTTTTGTTCGAGAATCA	GAAGCTAGATGCAGTAGGTGCAAGCGTAGAGTTGTTGATTGAGCAAAATGCGGATCCCCGGGTTAATTAA	GGTTGAGTCACATTTTGGAAGACGAAGATGTTGTTACCATCTTGAAAAAGCGGATCCCCGGGTTAATTAA	ATTATTTTTTTTTTTTTTCATTTCTTATATTATTTTTTGTTCGAGAATCAGAATTCGAGCTCGTTTAAAC	0		0		0
YAL035W	FUN12,yIF2	1	83296	86304	+	CTTTGAGGGGATAAGAAGGGCAATCAGGAACATCAGATAAGTGAAAGATG	GATCCGATTGGCTGCTATTGAAGAAGCTGAAGGTCGTTTTCGGCATCGAA	AAATTTTGTAGAATGTGATTGGGTTGACAAGTCAGCGTATGCCATGCTCA	CTTTGAGGGGATAAGAAGGGCAATCAGGAACATCAGATAAGTGAAAGATGCGGATCCCCGGGTTAATTAA	GATCCGATTGGCTGCTATTGAAGAAGCTGAAGGTCGTTTTCGGCATCGAACGGATCCCCGGGTTAATTAA	AAATTTTGTAGAATGTGATTGGGTTGACAAGTCAGCGTATGCCATGCTCAGAATTCGAGCTCGTTTAAAC	0		0		0
YAL034C-B	YAL034C-B	1	86358	86711	-	CATAATCTTCCTCGCCGATTTTGCTCTTGGATAGCAGATATTTTTCCATG	AATTGAAACTAATACACAAAGGTTCACATTTTTATATACAATTACCTATT	CATACGCTGACTTGTCAACCCAATCACATTCTACAAAATTTAATGAATTA	CATAATCTTCCTCGCCGATTTTGCTCTTGGATAGCAGATATTTTTCCATGCGGATCCCCGGGTTAATTAA	AATTGAAACTAATACACAAAGGTTCACATTTTTATATACAATTACCTATTCGGATCCCCGGGTTAATTAA	CATACGCTGACTTGTCAACCCAATCACATTCTACAAAATTTAATGAATTAGAATTCGAGCTCGTTTAAAC	1	YAL034W-A	1	YAL034W-A	0
YAL034W-A	MTW1,NSL2,DSN3	1	86587	87456	+	GTTGAGTAATAACACGTTGAAACTGGGTTAAGACGATCAAAACAACCATG	TTAGTATAGATATTGAAGAGCCTCAATTGGATTTACTTGATGATGTGTTA	GTGAATACATACATCATATCATAGCACATACTTTTTCCCACTTTATATTA	GTTGAGTAATAACACGTTGAAACTGGGTTAAGACGATCAAAACAACCATGCGGATCCCCGGGTTAATTAA	TTAGTATAGATATTGAAGAGCCTCAATTGGATTTACTTGATGATGTGTTACGGATCCCCGGGTTAATTAA	GTGAATACATACATCATATCATAGCACATACTTTTTCCCACTTTATATTAGAATTCGAGCTCGTTTAAAC	1	YAL034C-B	1	YAL034C-B	0
YAL034C	FUN19	1	87579	88820	-	CATCGATAAACAGGATATTCGCGCATCGTAACATTTATAGGGGAAACATG	CTTTCGAGAAGGTTGGCTGGCTACAGGATTCGAATTTTACGAAGTACTTA	AATTGGATAAAAGAAAACCATGTTTAAAATGCATACCACCATGTGTATTA	CATCGATAAACAGGATATTCGCGCATCGTAACATTTATAGGGGAAACATGCGGATCCCCGGGTTAATTAA	CTTTCGAGAAGGTTGGCTGGCTACAGGATTCGAATTTTACGAAGTACTTACGGATCCCCGGGTTAATTAA	AATTGGATAAAAGAAAACCATGTTTAAAATGCATACCACCATGTGTATTAGAATTCGAGCTCGTTTAAAC	0		0		0
YAL033W	POP5,FUN53	1	89575	90096	+	ATTAATGTGATAGCAATAGTTAGTGCAACAAAGAAACAAGTCGATAAATG	ATGATTTCAAGAAAATTGGAAGGGAAAACGAAAACGAAAACGAGGACGAT	AAAATAAAACTACTGCATATACGTGTACATCTATATATTAATATATTCTA	ATTAATGTGATAGCAATAGTTAGTGCAACAAAGAAACAAGTCGATAAATGCGGATCCCCGGGTTAATTAA	ATGATTTCAAGAAAATTGGAAGGGAAAACGAAAACGAAAACGAGGACGATCGGATCCCCGGGTTAATTAA	AAAATAAAACTACTGCATATACGTGTACATCTATATATTAATATATTCTAGAATTCGAGCTCGTTTAAAC	0		0		0
YAL032C	PRP45,FUN20	1	90204	91343	-	CATGGCAGCTCTGAGCCGAGAGGACGTATCAGCAACCTCAACCAAATATG	TTCAGTTTACTAAAGCTGAATCCGATGATAAATCGGATAACTATGGCGCC	CAACTCAAGCACAAGAATGCTTTGTTTTCCTAGTGCTCATCCTGGGCCTA	CATGGCAGCTCTGAGCCGAGAGGACGTATCAGCAACCTCAACCAAATATGCGGATCCCCGGGTTAATTAA	TTCAGTTTACTAAAGCTGAATCCGATGATAAATCGGATAACTATGGCGCCCGGATCCCCGGGTTAATTAA	CAACTCAAGCACAAGAATGCTTTGTTTTCCTAGTGCTCATCCTGGGCCTAGAATTCGAGCTCGTTTAAAC	0		0		0
YAL031W-A	YAL031W-A	1	91538	91846	+	AATATTAAAAAATAGTATGAGTACTTTTGAATCATCAGACAAGAACAATG	TGGACTTATGCTGTAGCGGCTTGATCATTGCCGAAGCAGGTATTGGCGGA	CCTAAACCAACAAAGGTGGGTTGGTACAAGAAGCCGGCTGTGCTACATTA	AATATTAAAAAATAGTATGAGTACTTTTGAATCATCAGACAAGAACAATGCGGATCCCCGGGTTAATTAA	TGGACTTATGCTGTAGCGGCTTGATCATTGCCGAAGCAGGTATTGGCGGACGGATCCCCGGGTTAATTAA	CCTAAACCAACAAAGGTGGGTTGGTACAAGAAGCCGGCTGTGCTACATTAGAATTCGAGCTCGTTTAAAC	1	YAL031C	1	YAL031C	0
YAL031C	GIP4,FUN21	1	91618	93900	-	GATTGGAAGCTGAAGGTTGAGGATTTAGACTAGTTTTATATTACAACATG	AAGAGTCGACCGGGCATAGAATAGCTTCTAAAATCAGAAGCAAATTGAGA	TTTTTTTTTTCCAGGGACATAAAGAGTTGTTTTTATAAGGTGCGGAGTTA	GATTGGAAGCTGAAGGTTGAGGATTTAGACTAGTTTTATATTACAACATGCGGATCCCCGGGTTAATTAA	AAGAGTCGACCGGGCATAGAATAGCTTCTAAAATCAGAAGCAAATTGAGACGGATCCCCGGGTTAATTAA	TTTTTTTTTTCCAGGGACATAAAGAGTTGTTTTTATAAGGTGCGGAGTTAGAATTCGAGCTCGTTTAAAC	1	YAL031W-A	1	YAL031W-A	0
YAL030W	SNC1	1	94155	94621	+	TGAAAATTTGCGCCAAAGACATAGCAAGCGCAACGTATTCATTGTCCATG	TCATATTGCTTGTTGTAATCATCGTCCCCATTGCTGTTCACTTTAGTCGA	CACTACATATGGAAGCTCCCTATATATATAGCATTGCGAGTGAACTTCTA	TGAAAATTTGCGCCAAAGACATAGCAAGCGCAACGTATTCATTGTCCATGCGGATCCCCGGGTTAATTAA	TCATATTGCTTGTTGTAATCATCGTCCCCATTGCTGTTCACTTTAGTCGACGGATCCCCGGGTTAATTAA	CACTACATATGGAAGCTCCCTATATATATAGCATTGCGAGTGAACTTCTAGAATTCGAGCTCGTTTAAAC	0		0		0
YAL029C	MYO4,SHE1,FUN22	1	94724	99138	-	TCTAAAACACAAAAAAACAAAAAAAATCCTATAACCAGTTCTCCCGCATG	ATACAGAGGGCTTAGCTACTGTCAGTAAAATTATAAAATTAGACAGAAAA	ATGTATATATACATATATACATATATGGGCGTATATTTACTTTGTTCTTA	TCTAAAACACAAAAAAACAAAAAAAATCCTATAACCAGTTCTCCCGCATGCGGATCCCCGGGTTAATTAA	ATACAGAGGGCTTAGCTACTGTCAGTAAAATTATAAAATTAGACAGAAAACGGATCCCCGGGTTAATTAA	ATGTATATATACATATATACATATATGGGCGTATATTTACTTTGTTCTTAGAATTCGAGCTCGTTTAAAC	0		0		0
YAL028W	FRT2,HPH2	1	99768	101354	+	CAAATTGATGGCAGTTTTTTACGTAGTCCAGTAGTTGTCCAGGTACAATG	TTATCATCATCGTCATATGCTATACCTTCAAGCATCTAGTATCGCATAAA	ATATGAAAAAATCACAGGATCATTTTTTGATATACAAATACTATTTTTTA	CAAATTGATGGCAGTTTTTTACGTAGTCCAGTAGTTGTCCAGGTACAATGCGGATCCCCGGGTTAATTAA	TTATCATCATCGTCATATGCTATACCTTCAAGCATCTAGTATCGCATAAACGGATCCCCGGGTTAATTAA	ATATGAAAAAATCACAGGATCATTTTTTGATATACAAATACTATTTTTTAGAATTCGAGCTCGTTTAAAC	0		0		0
YAL027W	YAL027W	1	101555	102340	+	GAATACAAGAAGATTGAGTATATTGGACTTCACAGTAACCGTGAAAAATG	GGCCTAGAAGACATAAGGTACGTACCCAGTCGAAGCAACCCCAGGAGGAA	GTTATATAGAAGTTATAATATTAAGCCATCACTTTGTTATCGGTTTTTCA	GAATACAAGAAGATTGAGTATATTGGACTTCACAGTAACCGTGAAAAATGCGGATCCCCGGGTTAATTAA	GGCCTAGAAGACATAAGGTACGTACCCAGTCGAAGCAACCCCAGGAGGAACGGATCCCCGGGTTAATTAA	GTTATATAGAAGTTATAATATTAAGCCATCACTTTGTTATCGGTTTTTCAGAATTCGAGCTCGTTTAAAC	1	YAL026C-A	1	YAL026C-A	0
YAL026C-A	YAL026C-A	1	102254	102691	-	CTTTTCACAGGCTGAAGAGGGTGGGCAAGAAAAAATTGTCAGAATGTATG	ACCTTATGTCTTCTAGGCCTATGCAACACATGTACATCAATAATTTCACC	AGGATATAAAACCTGTAATAGAATTTATGTACAAGCCTGTTATTAATTTA	CTTTTCACAGGCTGAAGAGGGTGGGCAAGAAAAAATTGTCAGAATGTATGCGGATCCCCGGGTTAATTAA	ACCTTATGTCTTCTAGGCCTATGCAACACATGTACATCAATAATTTCACCCGGATCCCCGGGTTAATTAA	AGGATATAAAACCTGTAATAGAATTTATGTACAAGCCTGTTATTAATTTAGAATTCGAGCTCGTTTAAAC	2	YAL027W;YAL026C	2	YAL027W;YAL026C	0
YAL026C	DRS2,SWA3,FUN38	1	102498	106564	-	GCCAAGCAATAATTTACTGGTAGGTTCTTTCATTCCCTGATTTTACCATG	AAAATTCAAATAGATTCAGTTCTTCGAGAGATGATATTTCATTTGATATA	TATTTTTATTTTTGTATTTTTTGTCTTCTGCTCTTTGTTTCTGTGCCTCA	GCCAAGCAATAATTTACTGGTAGGTTCTTTCATTCCCTGATTTTACCATGCGGATCCCCGGGTTAATTAA	AAAATTCAAATAGATTCAGTTCTTCGAGAGATGATATTTCATTTGATATACGGATCCCCGGGTTAATTAA	TATTTTTATTTTTGTATTTTTTGTCTTCTGCTCTTTGTTTCTGTGCCTCAGAATTCGAGCTCGTTTAAAC	1	YAL026C-A	1	YAL026C-A	1	HRA1
YAL025C	MAK16	1	107092	108012	-	GTGTTCTCTTCAGTACATAACTACAACGGTTAGAATACAACGAGGATATG	AATACGAGGAGGAACACGAAGTTCAAAATGCTGAGCAAGAAGTGGCACAA	TAATAGAAACTGAAATCATGTAATGTTGCGTAGTATAGTGCGTGAGCTTA	GTGTTCTCTTCAGTACATAACTACAACGGTTAGAATACAACGAGGATATGCGGATCCCCGGGTTAATTAA	AATACGAGGAGGAACACGAAGTTCAAAATGCTGAGCAAGAAGTGGCACAACGGATCCCCGGGTTAATTAA	TAATAGAAACTGAAATCATGTAATGTTGCGTAGTATAGTGCGTGAGCTTAGAATTCGAGCTCGTTTAAAC	0		0		0
YAL024C	LTE1,MSI2	1	108432	112739	-	TTGCTTTACATAGCCTCTAGCCATTCAAAGATTCGCTACCCTGAACCATG	GTGTTTATATTAGCACATTAACACAAGAAGAGATTAATGAACTATCCACA	TTTTTTACAAGAGGAATTTGGGAACTGGAGGAAAGTGGCACAATACCTCA	TTGCTTTACATAGCCTCTAGCCATTCAAAGATTCGCTACCCTGAACCATGCGGATCCCCGGGTTAATTAA	GTGTTTATATTAGCACATTAACACAAGAAGAGATTAATGAACTATCCACACGGATCCCCGGGTTAATTAA	TTTTTTACAAGAGGAATTTGGGAACTGGAGGAAAGTGGCACAATACCTCAGAATTCGAGCTCGTTTAAAC	0		0		0
YAL023C	PMT2,FUN25	1	113139	115418	-	GTCCACATCGCTACTGTCATTCTGTTTCGAACCGTGGTCCAGCAATCATG	GCTACTTAAACTGGTTTTCCACTTGGGACATTGCCGACAAGCAAGAAGCA	ATTTAATTCTTGTTTTTTACTTATGTACTTACTACGATGATCTTAATTCA	GTCCACATCGCTACTGTCATTCTGTTTCGAACCGTGGTCCAGCAATCATGCGGATCCCCGGGTTAATTAA	GCTACTTAAACTGGTTTTCCACTTGGGACATTGCCGACAAGCAAGAAGCACGGATCCCCGGGTTAATTAA	ATTTAATTCTTGTTTTTTACTTATGTACTTACTACGATGATCTTAATTCAGAATTCGAGCTCGTTTAAAC	0		0		0
YAL022C	FUN26	1	115744	117297	-	GGCGACAGCTTATCATCAAACGCAAGAAAGCATACCAGATTGCAAAAATG	GCAGCATCATAAGCTACGTATTCGTCTTCATAATTGACTTTATTATCAGG	CGTATCACGACTGTAAATGATGGCGTTTCGGTATGTACAGTATCTATCTA	GGCGACAGCTTATCATCAAACGCAAGAAAGCATACCAGATTGCAAAAATGCGGATCCCCGGGTTAATTAA	GCAGCATCATAAGCTACGTATTCGTCTTCATAATTGACTTTATTATCAGGCGGATCCCCGGGTTAATTAA	CGTATCACGACTGTAAATGATGGCGTTTCGGTATGTACAGTATCTATCTAGAATTCGAGCTCGTTTAAAC	0		0		0
YAL021C	CCR4,NUT21,FUN27	1	117713	120226	-	ACCAGCAAGGGAACTCCGACTGACGTTATCCCTGCAAACTACCGCTAATG	TGTTAGCAAGATTTGAATTTATGAAGACAAACACAGGCAGTAAGAAAGTA	AGGTAGTGTACAGAGAGGAGGGAGGGAGTGGGATGAAAGTGTGCGGTTTA	ACCAGCAAGGGAACTCCGACTGACGTTATCCCTGCAAACTACCGCTAATGCGGATCCCCGGGTTAATTAA	TGTTAGCAAGATTTGAATTTATGAAGACAAACACAGGCAGTAAGAAAGTACGGATCCCCGGGTTAATTAA	AGGTAGTGTACAGAGAGGAGGGAGGGAGTGGGATGAAAGTGTGCGGTTTAGAATTCGAGCTCGTTTAAAC	0		0		0
YAL020C	ATS1,KTI13,FUN28	1	120481	121482	-	GCAAGTGATGGAATGTGATCATTAAAGGCTATAACAGGCTTGTATCGATG	CTGGAAAACCTCGCGTGTTTGGCGGATGTGCCACCACGTGGATCGTGCTC	ATGGACATCTATGTATATGATAGTGGGTATATAGTTACTTATCAGTGCTA	GCAAGTGATGGAATGTGATCATTAAAGGCTATAACAGGCTTGTATCGATGCGGATCCCCGGGTTAATTAA	CTGGAAAACCTCGCGTGTTTGGCGGATGTGCCACCACGTGGATCGTGCTCCGGATCCCCGGGTTAATTAA	ATGGACATCTATGTATATGATAGTGGGTATATAGTTACTTATCAGTGCTAGAATTCGAGCTCGTTTAAAC	1	YAL019W-A	1	YAL019W-A	0
YAL019W-A	YAL019W-A	1	121117	121686	+	AAACATCCGTATACTGCGATGCGCTCATCGTTGGAATTCAATGGCACATG	GCCCATCTCGCAATGCAACACGTAACTTAAATCAGTACTGGCGTGTGCTA	TAGATAGTCGGGTGTCCACCAGTAGCAACAAACTCGAATATAGAGCACTA	AAACATCCGTATACTGCGATGCGCTCATCGTTGGAATTCAATGGCACATGCGGATCCCCGGGTTAATTAA	GCCCATCTCGCAATGCAACACGTAACTTAAATCAGTACTGGCGTGTGCTACGGATCCCCGGGTTAATTAA	TAGATAGTCGGGTGTCCACCAGTAGCAACAAACTCGAATATAGAGCACTAGAATTCGAGCTCGTTTAAAC	1	YAL020C	1	YAL020C	0
YAL019W	FUN30	1	121786	125181	+	AGGAACGTAAACAAGAAAAAGAGAGAAAATACGCTATAGTTGAAAACATG	TGGAGGATATAATTTATGATGAAAACTCGAAACCGAAGGGAACCAAAGAA	TTTATTTTCTGCTTATCTATTTACTTTTTTACTATATTTTTATTTATTTA	AGGAACGTAAACAAGAAAAAGAGAGAAAATACGCTATAGTTGAAAACATGCGGATCCCCGGGTTAATTAA	TGGAGGATATAATTTATGATGAAAACTCGAAACCGAAGGGAACCAAAGAACGGATCCCCGGGTTAATTAA	TTTATTTTCTGCTTATCTATTTACTTTTTTACTATATTTTTATTTATTTAGAATTCGAGCTCGTTTAAAC	0		0		0
YAL018C	YAL018C	1	125431	126408	-	GTGTAGGGAACAAAGGTACATTATACAAACAATAACAACAACAGGAAATG	AAGCTGAAATTGAAGCAGCACCACAAGATATCAATCAACAACCGAATCAA	GCTAGGTAATTTTAATCTGGGGAGAGAAATGGTGAACTTTTTTCAATTTA	GTGTAGGGAACAAAGGTACATTATACAAACAATAACAACAACAGGAAATGCGGATCCCCGGGTTAATTAA	AAGCTGAAATTGAAGCAGCACCACAAGATATCAATCAACAACCGAATCAACGGATCCCCGGGTTAATTAA	GCTAGGTAATTTTAATCTGGGGAGAGAAATGGTGAACTTTTTTCAATTTAGAATTCGAGCTCGTTTAAAC	0		0		0
YAL017W	PSK1,FUN31	1	127092	131162	+	GTTTTGTTCTCTCCCTAATTTGCATATAGGTAAACATCAAAGAAGTAATG	CGAAGAGACCCACCATTGACGACATAAATAACGACAAATGGTTGGTTATT	GCATTTTCTTTTCCAATTACTAATGTCCTAGAATGATCATTAATCCTTCA	GTTTTGTTCTCTCCCTAATTTGCATATAGGTAAACATCAAAGAAGTAATGCGGATCCCCGGGTTAATTAA	CGAAGAGACCCACCATTGACGACATAAATAACGACAAATGGTTGGTTATTCGGATCCCCGGGTTAATTAA	GCATTTTCTTTTCCAATTACTAATGTCCTAGAATGATCATTAATCCTTCAGAATTCGAGCTCGTTTAAAC	0		0		0
YAL016C-B	YAL016C-B	1	131174	131359	-	CTAAATATGTAAATTTTTTATATTTAAGTCTTGATTAACTGCTTTGGATG	CTACTGGATATTTTTTTGCATTTTCTTTTCCAATTACTAATGTCCTAGAA	GACGACATAAATAACGACAAATGGTTGGTTATTTGAAGGATTAATGATCA	CTAAATATGTAAATTTTTTATATTTAAGTCTTGATTAACTGCTTTGGATGCGGATCCCCGGGTTAATTAA	CTACTGGATATTTTTTTGCATTTTCTTTTCCAATTACTAATGTCCTAGAACGGATCCCCGGGTTAATTAA	GACGACATAAATAACGACAAATGGTTGGTTATTTGAAGGATTAATGATCAGAATTCGAGCTCGTTTAAAC	0		0		0
YAL016C-A	YAL016C-A	1	131622	131936	-	AGGGAATCAACTCGTTTCTTGTTCTTTCGGGACCGAGTGCCAACGCGATG	GTTCCACGTTAGTATTGTTGCTATCTGCCTTCCTTCGTAACTTAGTTCCC	TTTTGCAGGGAAAGCGAAAAAGGTGAAAGAGTTAACAGGAGAAAGTGTTA	AGGGAATCAACTCGTTTCTTGTTCTTTCGGGACCGAGTGCCAACGCGATGCGGATCCCCGGGTTAATTAA	GTTCCACGTTAGTATTGTTGCTATCTGCCTTCCTTCGTAACTTAGTTCCCCGGATCCCCGGGTTAATTAA	TTTTGCAGGGAAAGCGAAAAAGGTGAAAGAGTTAACAGGAGAAAGTGTTAGAATTCGAGCTCGTTTAAAC	1	YAL016W	1	YAL016W	0
YAL016W	TPD3,FUN32	1	131746	133653	+	GTATCTGATTATCGAAGAATAATTGAGTGGTCAGAAAGGAGCGAAATATG	AATACTTCGCTAAGAAAAGTTTGGCAGAATGTCAAGAACTTTTAAAAAAT	TCATTCAAGTGTACATATGTGTATGTATGTATATATTTGAACTAGTATCA	GTATCTGATTATCGAAGAATAATTGAGTGGTCAGAAAGGAGCGAAATATGCGGATCCCCGGGTTAATTAA	AATACTTCGCTAAGAAAAGTTTGGCAGAATGTCAAGAACTTTTAAAAAATCGGATCCCCGGGTTAATTAA	TCATTCAAGTGTACATATGTGTATGTATGTATATATTTGAACTAGTATCAGAATTCGAGCTCGTTTAAAC	1	YAL016C-A	1	YAL016C-A	0
YAL015C	NTG1,SCR1,FUN33	1	133770	134969	-	ATATATTTGTATCTATATATACTTTATAGCCCAAAAAAAAAAAAAATATG	AAGAAACTATGGTCAAACTGGAAAATGATATTTCTGTTAAAGTAGAGGAC	ACTAGGCCTGCTTTCTTTTCTTTTCTTTTTTTTTTTTTTTACCACACTTA	ATATATTTGTATCTATATATACTTTATAGCCCAAAAAAAAAAAAAATATGCGGATCCCCGGGTTAATTAA	AAGAAACTATGGTCAAACTGGAAAATGATATTTCTGTTAAAGTAGAGGACCGGATCCCCGGGTTAATTAA	ACTAGGCCTGCTTTCTTTTCTTTTCTTTTTTTTTTTTTTTACCACACTTAGAATTCGAGCTCGTTTAAAC	0		0		0
YAL014C	SYN8,SLT2,UIP2	1	135119	135886	-	TAGAGACAGATCTCACGACAGCAAATAGATGCGTAAGCACACACGGTATG	TGATTATTCTTGTGCTGATAGTGGTGCTCCTGTTGCTTCTATTAGTATTA	GATCAAAACCAAACTTCGTATTCGAGCCTAAAAAACAGAATATAATGTTA	TAGAGACAGATCTCACGACAGCAAATAGATGCGTAAGCACACACGGTATGCGGATCCCCGGGTTAATTAA	TGATTATTCTTGTGCTGATAGTGGTGCTCCTGTTGCTTCTATTAGTATTACGGATCCCCGGGTTAATTAA	GATCAAAACCAAACTTCGTATTCGAGCCTAAAAAACAGAATATAATGTTAGAATTCGAGCTCGTTTAAAC	0		0		0
YAL013W	DEP1,FUN54	1	136137	137397	+	AAGGGAAGGAAGCACAGAAGCAAGAGGAGGCGCATCGATCGTGGCAGATG	GGCCCAGTGACCGCCACACTGGACCCCATACCACTTCTTTTTGTTATTCT	CTAATTATTAGTAATGAAGGGTGGAATTACATAGCGTTACAACATATTTA	AAGGGAAGGAAGCACAGAAGCAAGAGGAGGCGCATCGATCGTGGCAGATGCGGATCCCCGGGTTAATTAA	GGCCCAGTGACCGCCACACTGGACCCCATACCACTTCTTTTTGTTATTCTCGGATCCCCGGGTTAATTAA	CTAATTATTAGTAATGAAGGGTGGAATTACATAGCGTTACAACATATTTAGAATTCGAGCTCGTTTAAAC	0		0		0
YAL012W	CYS3,STR1,FUN35,CYI1	1	137666	138850	+	ACATTTGCACCTTATACATATACACACAAGACAAAACCAAAAAAAATATG	CTGACGATCTTTTGGAAGACATCAAGCAAGCCTTGAAACAAGCCACCAAC	TCGTACTTAAAAAGGTCCGGTCGAAGGCAGAGACGTGGCACTGGCGATTA	ACATTTGCACCTTATACATATACACACAAGACAAAACCAAAAAAAATATGCGGATCCCCGGGTTAATTAA	CTGACGATCTTTTGGAAGACATCAAGCAAGCCTTGAAACAAGCCACCAACCGGATCCCCGGGTTAATTAA	TCGTACTTAAAAAGGTCCGGTCGAAGGCAGAGACGTGGCACTGGCGATTAGAATTCGAGCTCGTTTAAAC	0		0		0
YAL011W	SWC3,SWC1	1	139066	140943	+	GCATATGCATGCGATTTGGAAGTAACGCTCGCCGTAGACAAGTAAGAATG	TCGAACTAAATGAGTGGGAGCACGCCATGAGAAGCAGAAGACACAAAAGA	GTGTATAATCATAATGGCGTTAAAGCAGAATAAAGTAACCGAACACCTTA	GCATATGCATGCGATTTGGAAGTAACGCTCGCCGTAGACAAGTAAGAATGCGGATCCCCGGGTTAATTAA	TCGAACTAAATGAGTGGGAGCACGCCATGAGAAGCAGAAGACACAAAAGACGGATCCCCGGGTTAATTAA	GTGTATAATCATAATGGCGTTAAAGCAGAATAAAGTAACCGAACACCTTAGAATTCGAGCTCGTTTAAAC	0		0		0
YAL010C	MDM10,FUN37	1	141051	142532	-	GCAAATATACGTTAGGAAAAAGACACGAACAGAGAAGACCGATCTTGATG	ATATACCAGTTTTCCCGGCAAAGTTTGGCATACAATTCCAGTACTCCACA	TTTTTTAACCTGTATATTAAAACCTTTATTTTATTTCACATTACTCATCA	GCAAATATACGTTAGGAAAAAGACACGAACAGAGAAGACCGATCTTGATGCGGATCCCCGGGTTAATTAA	ATATACCAGTTTTCCCGGCAAAGTTTGGCATACAATTCCAGTACTCCACACGGATCCCCGGGTTAATTAA	TTTTTTAACCTGTATATTAAAACCTTTATTTTATTTCACATTACTCATCAGAATTCGAGCTCGTTTAAAC	0		0		0
YAL009W	SPO7	1	142721	143500	+	ATACACACAAAGGAAGAAAGGTAGTGGAAAGCTAAATAAAGGAGGTCATG	AAGGTGCTAGAAGACGCAAACAAGCGCACGAACTCCGACCTAAATCAGAA	TAGGTAAATATGACCTCTTATTCGAAGGAAGAAGCCCTCCAACTCTTTCA	ATACACACAAAGGAAGAAAGGTAGTGGAAAGCTAAATAAAGGAGGTCATGCGGATCCCCGGGTTAATTAA	AAGGTGCTAGAAGACGCAAACAAGCGCACGAACTCCGACCTAAATCAGAACGGATCCCCGGGTTAATTAA	TAGGTAAATATGACCTCTTATTCGAAGGAAGAAGCCCTCCAACTCTTTCAGAATTCGAGCTCGTTTAAAC	0		0		0
YAL008W	FUN14	1	143781	144377	+	TAACGCTAGAGGGGCAAGAAGGAAGAACTTAAAATAATAGGTGTAAAATG	AAGTATTCTTTACATTGAGTTTCGTATTAGCAAGTTTAAATGCTAACAAA	AAAACGAAAGAATATAACCCTCGTTTATATCTGGTCATTTGTCTTGCTCA	TAACGCTAGAGGGGCAAGAAGGAAGAACTTAAAATAATAGGTGTAAAATGCGGATCCCCGGGTTAATTAA	AAGTATTCTTTACATTGAGTTTCGTATTAGCAAGTTTAAATGCTAACAAACGGATCCCCGGGTTAATTAA	AAAACGAAAGAATATAACCCTCGTTTATATCTGGTCATTTGTCTTGCTCAGAATTCGAGCTCGTTTAAAC	0		0		0
YAL007C	ERP2	1	144565	145212	-	ACTAGAATAAGATAAACAGTGGAGTACACTCATTGTAAAGGAAAACCATG	AAGTTCTACTTATTCAATTCCTCTTCACTGGTCGTCAAAAAAATTACGTT	TTGTGTTCTATATTGCGGACATATATTTTTCGTAGATTGAAAAGTTCTTA	ACTAGAATAAGATAAACAGTGGAGTACACTCATTGTAAAGGAAAACCATGCGGATCCCCGGGTTAATTAA	AAGTTCTACTTATTCAATTCCTCTTCACTGGTCGTCAAAAAAATTACGTTCGGATCCCCGGGTTAATTAA	TTGTGTTCTATATTGCGGACATATATTTTTCGTAGATTGAAAAGTTCTTAGAATTCGAGCTCGTTTAAAC	0		0		0
YAL005C	SSA1,YG100	1	146370	148296	-	TAATCAAGTATTACAAGAAACAAAAATTCAAGTAAATAACAGATAATATG	GTGCTCCTCCAGCTCCAGAGGCTGAAGGTCCAACCGTTGAAGAAGTTGAT	ATCATTAAAAGACATTTTCGTTATTATCAATTGCCGCACCAATTGGCTTA	TAATCAAGTATTACAAGAAACAAAAATTCAAGTAAATAACAGATAATATGCGGATCCCCGGGTTAATTAA	GTGCTCCTCCAGCTCCAGAGGCTGAAGGTCCAACCGTTGAAGAAGTTGATCGGATCCCCGGGTTAATTAA	ATCATTAAAAGACATTTTCGTTATTATCAATTGCCGCACCAATTGGCTTAGAATTCGAGCTCGTTTAAAC	1	YAL004W	1	YAL004W	0
YAL004W	YAL004W	1	147627	148272	+	TGGATGAAGTGGTTGACCAATCTGTTGTCAAAATCTTCACCACCCAAATG	ATGTCCACACGATCATTAGCAAAGTGAGCAACACACGAGTATGTTGTACC	AATTCAAGTAAATAACAGATAATATGTCAAAAGCTGTCGGTATTGATTTA	TGGATGAAGTGGTTGACCAATCTGTTGTCAAAATCTTCACCACCCAAATGCGGATCCCCGGGTTAATTAA	ATGTCCACACGATCATTAGCAAAGTGAGCAACACACGAGTATGTTGTACCCGGATCCCCGGGTTAATTAA	AATTCAAGTAAATAACAGATAATATGTCAAAAGCTGTCGGTATTGATTTAGAATTCGAGCTCGTTTAAAC	1	YAL005C	1	YAL005C	0
YAL003W	EFB1,TEF5	1	149039	150025	+	TTCTACCTTTCAGCACTGAAGAGTCCAACCGAATATATACACACATAATG	AAGACGAAGACCACGTCCAATCTACCGATATTGCTGCTATGCAAAAATTA	TTGTTTTTGCTTTAATGTTAATTATAAAAAGTTTATAAAAAAGCCTTTTA	TTCTACCTTTCAGCACTGAAGAGTCCAACCGAATATATACACACATAATGCGGATCCCCGGGTTAATTAA	AAGACGAAGACCACGTCCAATCTACCGATATTGCTGCTATGCAAAAATTACGGATCCCCGGGTTAATTAA	TTGTTTTTGCTTTAATGTTAATTATAAAAAGTTTATAAAAAAGCCTTTTAGAATTCGAGCTCGTTTAAAC	0		0		1	snR18
YAL002W	VPS8,VPT8,FUN15	1	150572	154396	+	AAGTGTAAAATATATATCTGCCGAGACCATTACTCATTACACCTAGAATG	ATGAATATTCTTGTTTAATTTGCCAGACGGAATCTAACCCAAAAATAGTA	AAATTTTACTTTTATGTAACCAAAGTTGTATTAAATATTTAGAAATGTTA	AAGTGTAAAATATATATCTGCCGAGACCATTACTCATTACACCTAGAATGCGGATCCCCGGGTTAATTAA	ATGAATATTCTTGTTTAATTTGCCAGACGGAATCTAACCCAAAAATAGTACGGATCCCCGGGTTAATTAA	AAATTTTACTTTTATGTAACCAAAGTTGTATTAAATATTTAGAAATGTTAGAATTCGAGCTCGTTTAAAC	0		0		0
YAL001C	TFC3,TSV115,FUN24	1	154459	158031	-	TAAGAGAGAAGAGGACGTTTGGTTGAAGCCAACTAGCCACAAGAAAAATG	TTGATGGCTATTGGGTCAATCATAATTGGTATTCTATATATGAATCTACA	AATACAACTTTGGTTACATAAAAGTAAAATTTATACACCTCATTTCATTA	TAAGAGAGAAGAGGACGTTTGGTTGAAGCCAACTAGCCACAAGAAAAATGCGGATCCCCGGGTTAATTAA	TTGATGGCTATTGGGTCAATCATAATTGGTATTCTATATATGAATCTACACGGATCCCCGGGTTAATTAA	AATACAACTTTGGTTACATAAAAGTAAAATTTATACACCTCATTTCATTAGAATTCGAGCTCGTTTAAAC	0		0		0
YAR002W	NUP60	1	159122	160741	+	CCTTTACATCAAATAAGCACCGCAAGATATCCTAAAATCGACATCCAATG	GCTTGGTTGATGAAAATAAAGTTGAGGCTTTCAAGTCCCTATATACCTTT	TTGAGTTGGGCTATACGGTAATTATGTCACGGCTAAAATTTTCATTATCA	CCTTTACATCAAATAAGCACCGCAAGATATCCTAAAATCGACATCCAATGCGGATCCCCGGGTTAATTAA	GCTTGGTTGATGAAAATAAAGTTGAGGCTTTCAAGTCCCTATATACCTTTCGGATCCCCGGGTTAATTAA	TTGAGTTGGGCTATACGGTAATTATGTCACGGCTAAAATTTTCATTATCAGAATTCGAGCTCGTTTAAAC	0		0		0
YAR002C-A	ERP1	1	160930	161589	-	CTGTAGTTTGGAAAAGTATTTAAAGGTAACCAATCTCTCTACTAATCATG	GCTGGCAAATGAAACACCTGGGCAAATTTTTTGTTAAGCAAAAAATTTTA	TATAAACTATAAATTTCTAGAAGATACATAAAAGGTTTTTAGTCTGATCA	CTGTAGTTTGGAAAAGTATTTAAAGGTAACCAATCTCTCTACTAATCATGCGGATCCCCGGGTTAATTAA	GCTGGCAAATGAAACACCTGGGCAAATTTTTTGTTAAGCAAAAAATTTTACGGATCCCCGGGTTAATTAA	TATAAACTATAAATTTCTAGAAGATACATAAAAGGTTTTTAGTCTGATCAGAATTCGAGCTCGTTTAAAC	0		0		0
YAR003W	SWD1,SAF49,CPS50,FUN16	1	161870	163150	+	GAGACCGAGTCCTTTTAGTTTGTGTATATCAGCTGGTTCTTTTCGTTATG	GGTTCACAATCCCTACAGATTATACGAGGATAATTAAGATGCAGTCATCA	CTTCAGTGTCAGTTGCCTATTTAAACTTTCTCCTTTTGAAGAGAAACCTA	GAGACCGAGTCCTTTTAGTTTGTGTATATCAGCTGGTTCTTTTCGTTATGCGGATCCCCGGGTTAATTAA	GGTTCACAATCCCTACAGATTATACGAGGATAATTAAGATGCAGTCATCACGGATCCCCGGGTTAATTAA	CTTCAGTGTCAGTTGCCTATTTAAACTTTCTCCTTTTGAAGAGAAACCTAGAATTCGAGCTCGTTTAAAC	0		0		0
YAR007C	RFA1,RPA1,FUN3,BUF2	1	163619	165484	-	ACGGTAAAGGCGAAACCAGCAAGAAGACCAGATTATACTTACAAGAGATG	GGGCTGAAGCCGACTATCTTGCCGATGAGTTATCCAAGGCTTTGTTAGCT	TTTCTCATATGTTACATAGATTAAATAGTACTTGATTATTTGATACATTA	ACGGTAAAGGCGAAACCAGCAAGAAGACCAGATTATACTTACAAGAGATGCGGATCCCCGGGTTAATTAA	GGGCTGAAGCCGACTATCTTGCCGATGAGTTATCCAAGGCTTTGTTAGCTCGGATCCCCGGGTTAATTAA	TTTCTCATATGTTACATAGATTAAATAGTACTTGATTATTTGATACATTAGAATTCGAGCTCGTTTAAAC	0		0		0
YAR008W	SEN34,FUN4	1	165830	166657	+	GCTATTAACATATATCAAAAAGAACGGCAAAAGGCGAGGAGGTTTTTATG	AAGAGACAAAGGAAACTCATTTCTTCTCAATAGAATGGGCTGGATTTGGT	AAATACATAAATTCTGAGAAAATAATTATACATGACTGATTCCCAGCTTA	GCTATTAACATATATCAAAAAGAACGGCAAAAGGCGAGGAGGTTTTTATGCGGATCCCCGGGTTAATTAA	AAGAGACAAAGGAAACTCATTTCTTCTCAATAGAATGGGCTGGATTTGGTCGGATCCCCGGGTTAATTAA	AAATACATAAATTCTGAGAAAATAATTATACATGACTGATTCCCAGCTTAGAATTCGAGCTCGTTTAAAC	0		0		0
YAR009C	YAR009C	1	167462	171054	-	CGTCTTAGAACGGTCTGACGGCACTGTACTTGCACCTATCGTAAAATATG	NNNNNNNNNNNNNNNNNNNNNNNNNNNNNNNNNNNNNNNNNNNNNNNNNN	NNNNNNNNNNNNNNNNNNNNNNNNNNNNNNNNNNNNNNNNNNNNNNNNNN	CGTCTTAGAACGGTCTGACGGCACTGTACTTGCACCTATCGTAAAATATGCGGATCCCCGGGTTAATTAA	NNNNNNNNNNNNNNNNNNNNNNNNNNNNNNNNNNNNNNNNNNNNNNNNNNCGGATCCCCGGGTTAATTAA	NNNNNNNNNNNNNNNNNNNNNNNNNNNNNNNNNNNNNNNNNNNNNNNNNNGAATTCGAGCTCGTTTAAAC	0		0		0
YAR010C	YAR010C	1	171411	172733	-	AACTTCTAGTATATTCTGTATACCTAATATTATAGCCTTTATCAACAATG	CGATTCAATTGAACAATAAGCACGACCTTCATCTTAGGCCAGAAACTTAC	GTCCAGGGAGTTCATCATCAGAATGATTAGTATGATTTACTGTAGATTCA	AACTTCTAGTATATTCTGTATACCTAATATTATAGCCTTTATCAACAATGCGGATCCCCGGGTTAATTAA	CGATTCAATTGAACAATAAGCACGACCTTCATCTTAGGCCAGAAACTTACCGGATCCCCGGGTTAATTAA	GTCCAGGGAGTTCATCATCAGAATGATTAGTATGATTTACTGTAGATTCAGAATTCGAGCTCGTTTAAAC	0		0		0
YAR014C	BUD14	1	173688	175817	-	GTGAAATACACGTAGTTTTTAGATAACATTCTCTGCTTGGTAAGAGAATG	TTGACAGAATGGATGTGTTGATGAAACAATTGGATGAAATTATTCGTAAA	AAGTTCGTTGGATGAGAAAAAGACCAGGCTTTATTGTAAGGACAATATCA	GTGAAATACACGTAGTTTTTAGATAACATTCTCTGCTTGGTAAGAGAATGCGGATCCCCGGGTTAATTAA	TTGACAGAATGGATGTGTTGATGAAACAATTGGATGAAATTATTCGTAAACGGATCCCCGGGTTAATTAA	AAGTTCGTTGGATGAGAAAAAGACCAGGCTTTATTGTAAGGACAATATCAGAATTCGAGCTCGTTTAAAC	0		0		0
YAR015W	ADE1	1	176321	177241	+	TCATAAGCATTGCTTACAAAGAATACACATACGAAATATTAACGATAATG	CCAAATATATAGAGGCTTATGAAACATTGACAGGGTCTAAATGGTCTCAC	ATTCAGTGAGGAGTTACACTGGCGACTTGTAGTATATGTAAATCACGTTA	TCATAAGCATTGCTTACAAAGAATACACATACGAAATATTAACGATAATGCGGATCCCCGGGTTAATTAA	CCAAATATATAGAGGCTTATGAAACATTGACAGGGTCTAAATGGTCTCACCGGATCCCCGGGTTAATTAA	ATTCAGTGAGGAGTTACACTGGCGACTTGTAGTATATGTAAATCACGTTAGAATTCGAGCTCGTTTAAAC	0		0		0
YAR018C	KIN3,NPK1,FUN52	1	177342	178649	-	TTCAATGAGAGTGCTATTTGATAATTGAATCAATTCTCTGTGTGAGTATG	ATGGTAAAAAATTTGCCAAACCTGCATACCACTGGCAAACAAGATATCGA	CATACATACCCGTATGTATTAATGTATAAATGTTCTCAGAGCAAATTTTA	TTCAATGAGAGTGCTATTTGATAATTGAATCAATTCTCTGTGTGAGTATGCGGATCCCCGGGTTAATTAA	ATGGTAAAAAATTTGCCAAACCTGCATACCACTGGCAAACAAGATATCGACGGATCCCCGGGTTAATTAA	CATACATACCCGTATGTATTAATGTATAAATGTTCTCAGAGCAAATTTTAGAATTCGAGCTCGTTTAAAC	0		0		0
YAR019C	CDC15,LYT1	1	179157	182081	-	GACAAAACACACATAAGCACTACCCATTTTCCTGGTAAGACTATACCATG	CCAAAGATAAAAGTGACGGCTTTTCCGTCCCCATTACAACATTTCAAACA	CTGTATTATTTCTCTATATATGTATGTATGCACATGCAATTCCTACATTA	GACAAAACACACATAAGCACTACCCATTTTCCTGGTAAGACTATACCATGCGGATCCCCGGGTTAATTAA	CCAAAGATAAAAGTGACGGCTTTTCCGTCCCCATTACAACATTTCAAACACGGATCCCCGGGTTAATTAA	CTGTATTATTTCTCTATATATGTATGTATGCACATGCAATTCCTACATTAGAATTCGAGCTCGTTTAAAC	1	YAR019W-A	1	YAR019W-A	0
YAR019W-A	YAR019W-A	1	181944	182289	+	TCATCATTTTCGTACACGACCTCCTTTATTGCCACGACTTGGTCAGTATG	TAATGGCACAGCAAAGTCCGCACAGAGCACTACAGTATAGCATAGAGTGC	GTCGTGTATGGAAAAGAGGCATAATCAAAATTGGGCCTATCAACTCATTA	TCATCATTTTCGTACACGACCTCCTTTATTGCCACGACTTGGTCAGTATGCGGATCCCCGGGTTAATTAA	TAATGGCACAGCAAAGTCCGCACAGAGCACTACAGTATAGCATAGAGTGCCGGATCCCCGGGTTAATTAA	GTCGTGTATGGAAAAGAGGCATAATCAAAATTGGGCCTATCAACTCATTAGAATTCGAGCTCGTTTAAAC	1	YAR019C	1	YAR019C	0
YAR020C	PAU7	1	183802	183969	-	TAAGCCTATATCATCACTAAGCAATAACCCAAAAAACAACAAATACAATG	GTGTTTATGTTTCCGATATCAGAGCTCATTTGGCTGAATACTACTCTTTC	ACAGCTTCTGCAATTTCAACTGGATAAGTTTCAGTTGGGTGAGCAGCTTA	TAAGCCTATATCATCACTAAGCAATAACCCAAAAAACAACAAATACAATGCGGATCCCCGGGTTAATTAA	GTGTTTATGTTTCCGATATCAGAGCTCATTTGGCTGAATACTACTCTTTCCGGATCCCCGGGTTAATTAA	ACAGCTTCTGCAATTTCAACTGGATAAGTTTCAGTTGGGTGAGCAGCTTAGAATTCGAGCTCGTTTAAAC	0		0		0
YAR023C	YAR023C	1	186227	186766	-	CATACCAGAGTTATTTGCTTTACGAAATTGTACGCGCCAAGTATATAATG	TGCGGGAATATTGGCAAAGTCAATATCCAGATGTGGGCATACCTGCAATA	AAAGATGCGTTCTTTTTATACCAATATATTAGATACGTAAACTCTACTCA	CATACCAGAGTTATTTGCTTTACGAAATTGTACGCGCCAAGTATATAATGCGGATCCCCGGGTTAATTAA	TGCGGGAATATTGGCAAAGTCAATATCCAGATGTGGGCATACCTGCAATACGGATCCCCGGGTTAATTAA	AAAGATGCGTTCTTTTTATACCAATATATTAGATACGTAAACTCTACTCAGAATTCGAGCTCGTTTAAAC	0		0		0
YAR027W	UIP3	1	198343	199050	+	TCCAAAACCATATAATAACCTTACACAAGACAAGATATCAATTCAACATG	AAGCTGAATTTGAGTATTGGAGAAAGCAATACCCAGAGGTTGATTTGCCT	GTACATTTTATATTAGAATATACTAGATAAATACCAAAAATTCGGCCCTA	TCCAAAACCATATAATAACCTTACACAAGACAAGATATCAATTCAACATGCGGATCCCCGGGTTAATTAA	AAGCTGAATTTGAGTATTGGAGAAAGCAATACCCAGAGGTTGATTTGCCTCGGATCCCCGGGTTAATTAA	GTACATTTTATATTAGAATATACTAGATAAATACCAAAAATTCGGCCCTAGAATTCGAGCTCGTTTAAAC	0		0		0
YAR028W	YAR028W	1	199465	200169	+	AGGATAACATCTATAAGTGCCATATTAAGGCAAGATATCAATTGACCATG	AGGCTCAAAGTGAATACTGGAGAAAGCAATATCCTGACGCTGATTTACCT	CGTTTTAAAGAAAAGTAAGTATACTTGGTGAATAAAATGCTTCCGCTTCA	AGGATAACATCTATAAGTGCCATATTAAGGCAAGATATCAATTGACCATGCGGATCCCCGGGTTAATTAA	AGGCTCAAAGTGAATACTGGAGAAAGCAATATCCTGACGCTGATTTACCTCGGATCCCCGGGTTAATTAA	CGTTTTAAAGAAAAGTAAGTATACTTGGTGAATAAAATGCTTCCGCTTCAGAATTCGAGCTCGTTTAAAC	0		0		0
YAR029W	YAR029W	1	200894	201118	+	CACGCCAGCGTTCGGTGAAAGGGGAATGAAACATTATCACGTACAAGATG	TAAATCCCGGAGAAGATTTTCAAAATTGCTTTCCAAGACAGCGGATATTG	TCAAATAATTGCACCAATATCTTGCCAATACTTCACTTGAGATTGTTCTA	CACGCCAGCGTTCGGTGAAAGGGGAATGAAACATTATCACGTACAAGATGCGGATCCCCGGGTTAATTAA	TAAATCCCGGAGAAGATTTTCAAAATTGCTTTCCAAGACAGCGGATATTGCGGATCCCCGGGTTAATTAA	TCAAATAATTGCACCAATATCTTGCCAATACTTCACTTGAGATTGTTCTAGAATTCGAGCTCGTTTAAAC	1	YAR030C	1	YAR030C	0
YAR030C	YAR030C	1	201085	201426	-	AGGCATTTTTCATTCAATACTAAGTTCCGGAATGATACAAAATAAAAATG	TACTTCACTTGAGATTGTTCTACAATATCCGCTGTCTTGGAAAGCAATTT	GAGACTGAAGCTGGCGAATCTTTCACATTAAATCCCGGAGAAGATTTTCA	AGGCATTTTTCATTCAATACTAAGTTCCGGAATGATACAAAATAAAAATGCGGATCCCCGGGTTAATTAA	TACTTCACTTGAGATTGTTCTACAATATCCGCTGTCTTGGAAAGCAATTTCGGATCCCCGGGTTAATTAA	GAGACTGAAGCTGGCGAATCTTTCACATTAAATCCCGGAGAAGATTTTCAGAATTCGAGCTCGTTTAAAC	2	YAR029W;YAR031W	2	YAR029W;YAR031W	0
YAR031W	PRM9	1	201409	202305	+	CGATCAGAAAACTTAACCCGCAACCATCTTTGCTGTGCTAACAACTTATG	TTCAAAAGGAATATTGGCGACAAGAGTATCCTGGTGTCGATGAGTTTTTT	AATACCTTGCCTGGTAAAGTTGTGTGCTAGTGTCTCCCGTCTTCTGTCTA	CGATCAGAAAACTTAACCCGCAACCATCTTTGCTGTGCTAACAACTTATGCGGATCCCCGGGTTAATTAA	TTCAAAAGGAATATTGGCGACAAGAGTATCCTGGTGTCGATGAGTTTTTTCGGATCCCCGGGTTAATTAA	AATACCTTGCCTGGTAAAGTTGTGTGCTAGTGTCTCCCGTCTTCTGTCTAGAATTCGAGCTCGTTTAAAC	1	YAR030C	1	YAR030C	0
YAR033W	MST28	1	202680	203384	+	CAACCAGGAATACTATAGTCATAGGCAATACAAGGTATATATTGGCTATG	ACTGGCGAAGGCGGCATCCCAATATCGATGCGCTTCTTAAAAAGACGGAA	ATCATACTCTAGTTTATGTTCGCTTTACGTATGGTAGTGTCTCTAAGCTA	CAACCAGGAATACTATAGTCATAGGCAATACAAGGTATATATTGGCTATGCGGATCCCCGGGTTAATTAA	ACTGGCGAAGGCGGCATCCCAATATCGATGCGCTTCTTAAAAAGACGGAACGGATCCCCGGGTTAATTAA	ATCATACTCTAGTTTATGTTCGCTTTACGTATGGTAGTGTCTCTAAGCTAGAATTCGAGCTCGTTTAAAC	0		0		0
YAR035W	YAT1	1	204845	206908	+	ACCACACGACAATAACCACACCCGCCCACCCCTCCTTTCCGTATACAATG	TGAAATACCTGTTGTCCGGCTACGATTACTTCGACGTGAGCGTGTCCGGT	GTAGTAGTAGTAAAAATAATATTGATGCGCAAAAACTCAGCATAAACTCA	ACCACACGACAATAACCACACCCGCCCACCCCTCCTTTCCGTATACAATGCGGATCCCCGGGTTAATTAA	TGAAATACCTGTTGTCCGGCTACGATTACTTCGACGTGAGCGTGTCCGGTCGGATCCCCGGGTTAATTAA	GTAGTAGTAGTAAAAATAATATTGATGCGCAAAAACTCAGCATAAACTCAGAATTCGAGCTCGTTTAAAC	0		0		0
YAR035C-A	YAR035C-A	1	206989	207069	-	TGGTGCACGTTCGCTCGGCGAGTAAAAGAGGTAATCCAAACGACGGGATG	ATAGTAGCCAGCGGCGGCGCCAGTCACTTCCAAAGCGTTTTCCTCTTATT	TTTACTACTACTACTACTACTACTACTACTACATACTATTAAATATACTA	TGGTGCACGTTCGCTCGGCGAGTAAAAGAGGTAATCCAAACGACGGGATGCGGATCCCCGGGTTAATTAA	ATAGTAGCCAGCGGCGGCGCCAGTCACTTCCAAAGCGTTTTCCTCTTATTCGGATCCCCGGGTTAATTAA	TTTACTACTACTACTACTACTACTACTACTACATACTATTAAATATACTAGAATTCGAGCTCGTTTAAAC	0		0		0
YAR042W	SWH1,OSH1,YAR044W	1	207271	210837	+	GGGAAAAGTTTAAACATCAAAGTACACCTTTCACCCCTCCACACACCATG	ATTGGAACAAAAGAAAAAATCATGACTTTAAAGATTGTGCTGATATTTTC	GCAATGGATACAAATGAACGAGTGTTATTGTGACTACATTGCACAGCTTA	GGGAAAAGTTTAAACATCAAAGTACACCTTTCACCCCTCCACACACCATGCGGATCCCCGGGTTAATTAA	ATTGGAACAAAAGAAAAAATCATGACTTTAAAGATTGTGCTGATATTTTCCGGATCCCCGGGTTAATTAA	GCAATGGATACAAATGAACGAGTGTTATTGTGACTACATTGCACAGCTTAGAATTCGAGCTCGTTTAAAC	0		0		0
YAR047C	YAR047C	1	219388	219708	-	NNNNNNNNNNNNNNNNNNNNNNNNNNNNNNNNNNNNNNNNNNNNNNNNNN	NNNNNNNNNNNNNNNNNNNNNNNNNNNNNNNNNNNNNNNNNNNNNNNNNN	NNNNNNNNNNNNNNNNNNNNNNNNNNNNNNNNNNNNNNNNNNNNNNNNNN	NNNNNNNNNNNNNNNNNNNNNNNNNNNNNNNNNNNNNNNNNNNNNNNATGCGGATCCCCGGGTTAATTAA	NNNNNNNNNNNNNNNNNNNNNNNNNNNNNNNNNNNNNNNNNNNNNNNNNNCGGATCCCCGGGTTAATTAA	NNNNNNNNNNNNNNNNNNNNNNNNNNNNNNNNNNNNNNNNNNNNNNNNNNGAATTCGAGCTCGTTTAAAC	0		0		0
YAR050W	FLO1,FLO4,FLO2	1	223218	232539	+	GGGTTCTTGTTTTTAATTCTTGTCACCAGTAAACAGAACATCCAAAAATG	NNNNNNNNNNNNNNNNNNNNNNNNNNNNNNNNNNNNNNNNNNNNNNNNNN	NNNNNNNNNNNNNNNNNNNNNNNNNNNNNNNNNNNNNNNNNNNNNNNNNN	GGGTTCTTGTTTTTAATTCTTGTCACCAGTAAACAGAACATCCAAAAATGCGGATCCCCGGGTTAATTAA	NNNNNNNNNNNNNNNNNNNNNNNNNNNNNNNNNNNNNNNNNNNNNNNNNNCGGATCCCCGGGTTAATTAA	NNNNNNNNNNNNNNNNNNNNNNNNNNNNNNNNNNNNNNNNNNNNNNNNNNGAATTCGAGCTCGTTTAAAC	0		0		0
YAR053W	YAR053W	1	233458	233754	+	NNNNNNNNNNNNNNNNNNNNNNNNNNNNNNNNNNNNNNNNNNNNNNNNNN	TATTTATTTCGAATTCTTTTGCACTAGTATTTAAAATATCAGCAGAGGCG	AGTATCAATTTTAGGGCAAATAGTTTTACAATAATTTTGGTGCACTTTTA	NNNNNNNNNNNNNNNNNNNNNNNNNNNNNNNNNNNNNNNNNNNNNNNATGCGGATCCCCGGGTTAATTAA	TATTTATTTCGAATTCTTTTGCACTAGTATTTAAAATATCAGCAGAGGCGCGGATCCCCGGGTTAATTAA	AGTATCAATTTTAGGGCAAATAGTTTTACAATAATTTTGGTGCACTTTTAGAATTCGAGCTCGTTTAAAC	0		0		0
YAR060C	YAR060C	1	242247	242582	-	CTTTATCGGCGTGCGCAGGAAAAGAAAGAAAAAGGAAGGAAAAAGAGATG	TAATAGGTATCTCGTCTAGCGTAGTATCTCGAGTTTCCAGAAGTTGCAGA	CTCTTCTAAGCTGTAATTTAAAAAAAGCGATAAAACAATGATTTTGATTA	CTTTATCGGCGTGCGCAGGAAAAGAAAGAAAAAGGAAGGAAAAAGAGATGCGGATCCCCGGGTTAATTAA	TAATAGGTATCTCGTCTAGCGTAGTATCTCGAGTTTCCAGAAGTTGCAGACGGATCCCCGGGTTAATTAA	CTCTTCTAAGCTGTAATTTAAAAAAAGCGATAAAACAATGATTTTGATTAGAATTCGAGCTCGTTTAAAC	0		0		0
YAR061W	YAR061W	1	243230	243433	+	NNNNNNNNNNNNNNNNNNNNNNNNNNNNNNNNNNNNNNNNNNNNNNNNNN	NNNNNNNNNNNNNNNNNNNNNNNNNNNNNNNNNNNNNNNNNNNNNNNNNN	NNNNNNNNNNNNNNNNNNNNNNNNNNNNNNNNNNNNNNNNNNNNNNNNNN	NNNNNNNNNNNNNNNNNNNNNNNNNNNNNNNNNNNNNNNNNNNNNNNATGCGGATCCCCGGGTTAATTAA	NNNNNNNNNNNNNNNNNNNNNNNNNNNNNNNNNNNNNNNNNNNNNNNNNNCGGATCCCCGGGTTAATTAA	NNNNNNNNNNNNNNNNNNNNNNNNNNNNNNNNNNNNNNNNNNNNNNNNNNGAATTCGAGCTCGTTTAAAC	0		0		0
YAR062W	YAR062W	1	243640	244236	+	CTGATTTACTTGGTTTCTATACTATCCCAAAAAACGCTACTCTAGAAATG	CCAGTTTGTCATCATCTTCTTCAGAACAAATCACCAGCTCTATCACGTCT	ACCACAGAAGTTCCATTGCTGCGATAAAATGGGGTAATAATTGGATGCTA	CTGATTTACTTGGTTTCTATACTATCCCAAAAAACGCTACTCTAGAAATGCGGATCCCCGGGTTAATTAA	CCAGTTTGTCATCATCTTCTTCAGAACAAATCACCAGCTCTATCACGTCTCGGATCCCCGGGTTAATTAA	ACCACAGAAGTTCCATTGCTGCGATAAAATGGGGTAATAATTGGATGCTAGAATTCGAGCTCGTTTAAAC	0		0		0
YAR064W	YAR064W	1	245289	245588	+	GGAAAGATATTCTTTAACGAGACGGAGTAATTCTCGTCAGGAATAGGATG	ATCTTTTTCTTTTCTGTTTAGGGCGTATGATCTGTTCTGAGCCAAAGTTA	CTTTCTATACAATCCCTACTCTGTGAGGTGCTTATTCAAGCGATGATCTA	GGAAAGATATTCTTTAACGAGACGGAGTAATTCTCGTCAGGAATAGGATGCGGATCCCCGGGTTAATTAA	ATCTTTTTCTTTTCTGTTTAGGGCGTATGATCTGTTCTGAGCCAAAGTTACGGATCCCCGGGTTAATTAA	CTTTCTATACAATCCCTACTCTGTGAGGTGCTTATTCAAGCGATGATCTAGAATTCGAGCTCGTTTAAAC	0		0		0
YAR066W	YAR066W	1	246140	246751	+	TCTTTCTTTTTATTGGTAAACTCTCGCCCATTACAAAAAAAAAAGAGATG	CCTTTTCTTTGTCAAATGCTATTCTCAACGGTGGTTCTGTTTCCGGTTTG	AGGTTGATTTCACCGTTGTTTACAGAACCTTCATCGTCGTCTCTACGTTG	TCTTTCTTTTTATTGGTAAACTCTCGCCCATTACAAAAAAAAAAGAGATGCGGATCCCCGGGTTAATTAA	CCTTTTCTTTGTCAAATGCTATTCTCAACGGTGGTTCTGTTTCCGGTTTGCGGATCCCCGGGTTAATTAA	AGGTTGATTTCACCGTTGTTTACAGAACCTTCATCGTCGTCTCTACGTTGGAATTCGAGCTCGTTTAAAC	0		0		0
YAR068W	YAR068W	1	247497	247982	+	CACCTCAGGTTCCGCTTCTGTCTACACTACTACATTAACTTACTTGAATG	CAGCACCTTCACTGGTATCGTCGTTCAATCCGAAGGTATGGCTGCTGGTT	AAAAGCAAGGATGAAAATACCTGCCAAAGTACTTAAAGCATTGGTTCTCA	CACCTCAGGTTCCGCTTCTGTCTACACTACTACATTAACTTACTTGAATGCGGATCCCCGGGTTAATTAA	CAGCACCTTCACTGGTATCGTCGTTCAATCCGAAGGTATGGCTGCTGGTTCGGATCCCCGGGTTAATTAA	AAAAGCAAGGATGAAAATACCTGCCAAAGTACTTAAAGCATTGGTTCTCAGAATTCGAGCTCGTTTAAAC	0		0		0
YAR069C	YAR069C	1	249085	249378	-	NNNNNNNNNNNNNNNNNNNNNNNNNNNNNNNNNNNNNNNNNNNNNNNNNN	NNNNNNNNNNNNNNNNNNNNNGCATTGCCCTTACAGTTGTGTTTATTTTA	ACTCAGCTAAGACTCGACAATACAATTTTCTTATACTAAACGTAGATTTA	NNNNNNNNNNNNNNNNNNNNNNNNNNNNNNNNNNNNNNNNNNNNNNNATGCGGATCCCCGGGTTAATTAA	NNNNNNNNNNNNNNNNNNNNNGCATTGCCCTTACAGTTGTGTTTATTTTACGGATCCCCGGGTTAATTAA	ACTCAGCTAAGACTCGACAATACAATTTTCTTATACTAAACGTAGATTTAGAATTCGAGCTCGTTTAAAC	0		0		0
YAR070C	YAR070C	1	249976	250275	-	NNNNNNNNNNNNNNNNNNNNNNNNNNNNNNNNNNNNNNNNNNNNNNNNNN	NNNNNNNNNNNNNNNNNNNNNNNNNNNNNNNNNNNNNNNNNNNNNNNNNN	NNNNNNNNNNNNNNNNNNNNNNNNNNNNNNNNNNNNNNNNNNNNNNNNNN	NNNNNNNNNNNNNNNNNNNNNNNNNNNNNNNNNNNNNNNNNNNNNNNATGCGGATCCCCGGGTTAATTAA	NNNNNNNNNNNNNNNNNNNNNNNNNNNNNNNNNNNNNNNNNNNNNNNNNNCGGATCCCCGGGTTAATTAA	NNNNNNNNNNNNNNNNNNNNNNNNNNNNNNNNNNNNNNNNNNNNNNNNNNGAATTCGAGCTCGTTTAAAC	0		0		0
YAR071W	PHO11	1	251090	252493	+	NNNNNNNNNNNNNNNNNNNNNNNNNNNNNNNNNNNNNNNNNNNNNNNNNN	TTTTCTGGGACTGGAATANNNNNNNNNNNNNNNNNNNNNNNNNNNNNNNN	NNNNNNNNNNNNNNNNNNNNNNNNNNNNNNNNNNNNNNNNNNNNNNNNNN	NNNNNNNNNNNNNNNNNNNNNNNNNNNNNNNNNNNNNNNNNNNNNNNATGCGGATCCCCGGGTTAATTAA	TTTTCTGGGACTGGAATANNNNNNNNNNNNNNNNNNNNNNNNNNNNNNNNCGGATCCCCGGGTTAATTAA	NNNNNNNNNNNNNNNNNNNNNNNNNNNNNNNNNNNNNNNNNNNNNNNNNNGAATTCGAGCTCGTTTAAAC	0		0		0
YAR073W	IMD1	1	253593	254804	+	NNNNNNNNNNNNNNNNNNNNNNNNNNNNNNNNNNNNNNNNNNNNNNNNNN	NNNNNNNNNNNNNNNNNNNNNNNNNNNNNNNNNNNNNNNNNNNNNNNNNN	NNNNNNNNNNNNNNNNNNNNNNNNNNNNNNNNNNNNNNNNNNNNNNNNNN	NNNNNNNNNNNNNNNNNNNNNNNNNNNNNNNNNNNNNNNNNNNNNNNATGCGGATCCCCGGGTTAATTAA	NNNNNNNNNNNNNNNNNNNNNNNNNNNNNNNNNNNNNNNNNNNNNNNNNNCGGATCCCCGGGTTAATTAA	NNNNNNNNNNNNNNNNNNNNNNNNNNNNNNNNNNNNNNNNNNNNNNNNNNGAATTCGAGCTCGTTTAAAC	1	YAR075W	1	YAR075W	0
YAR075W	YAR075W	1	254695	255168	+	NNNNNNNNNNNNNNNNNNNNNNNNNNNNNNNNNNNNNNNNNNNNNNNNNN	NNNNNNNNNNNNNNNNNNNNNNNNNNNNNNNNNNNNNNNNNNNNNNNNNN	NNNNNNNNNNNNNNNNNNNNNNNNNNNNNNNNNNNNNNNNNNNNNNNNNN	NNNNNNNNNNNNNNNNNNNNNNNNNNNNNNNNNNNNNNNNNNNNNNNATGCGGATCCCCGGGTTAATTAA	NNNNNNNNNNNNNNNNNNNNNNNNNNNNNNNNNNNNNNNNNNNNNNNNNNCGGATCCCCGGGTTAATTAA	NNNNNNNNNNNNNNNNNNNNNNNNNNNNNNNNNNNNNNNNNNNNNNNNNNGAATTCGAGCTCGTTTAAAC	1	YAR073W	1	YAR073W	0
YBL113C	YBL113C	2	280	2658	-	ACCACCGATTAAGGAAGGCTGTATAACCGAACAGGTACGCGAGTTCTATG	NNNNNNNNNNNNNNNNNNNNNNNNNNNNNNNNNNNNNNNNNNNNNNNNNN	NNNNNNNNNNNNNNNNNNNNNNNNNNNNNNNNNNNNNNNNNNNNNNNNNN	ACCACCGATTAAGGAAGGCTGTATAACCGAACAGGTACGCGAGTTCTATGCGGATCCCCGGGTTAATTAA	NNNNNNNNNNNNNNNNNNNNNNNNNNNNNNNNNNNNNNNNNNNNNNNNNNCGGATCCCCGGGTTAATTAA	NNNNNNNNNNNNNNNNNNNNNNNNNNNNNNNNNNNNNNNNNNNNNNNNNNGAATTCGAGCTCGTTTAAAC	2	YBL113W-A;YBL112C	2	YBL113W-A;YBL112C	0
YBL113W-A	YBL113W-A	2	646	1128	+	CGCAAGTGCATTCCTAGACTTAATTCATATCTGCTCCTCAACTGTCGATG	TCCAAGTATTCTTTGTATTCCTCATCATTTCGCAGCATTCTCTCCACAGC	GTTGGGCTGGCCAGAAAGTATCGTATCGGAGGATAGCTTGGGAAGCACTA	CGCAAGTGCATTCCTAGACTTAATTCATATCTGCTCCTCAACTGTCGATGCGGATCCCCGGGTTAATTAA	TCCAAGTATTCTTTGTATTCCTCATCATTTCGCAGCATTCTCTCCACAGCCGGATCCCCGGGTTAATTAA	GTTGGGCTGGCCAGAAAGTATCGTATCGGAGGATAGCTTGGGAAGCACTAGAATTCGAGCTCGTTTAAAC	1	YBL113C	1	YBL113C	0
YBL112C	YBL112C	2	2582	2899	-	CTGCAGAAAAGGTGTCTCGCACAAAGGAGTTTGTCACTGACGGTAGCATG	AAAAAGGGCCAGCATGTTGGATGCTGTGGCTCCAGGACAGACCTGTCTGC	CCTGATTTTCAGCCAATCTGTCCATTCTTTCTATCAGTTCCACTGTGTCA	CTGCAGAAAAGGTGTCTCGCACAAAGGAGTTTGTCACTGACGGTAGCATGCGGATCCCCGGGTTAATTAA	AAAAAGGGCCAGCATGTTGGATGCTGTGGCTCCAGGACAGACCTGTCTGCCGGATCCCCGGGTTAATTAA	CCTGATTTTCAGCCAATCTGTCCATTCTTTCTATCAGTTCCACTGTGTCAGAATTCGAGCTCGTTTAAAC	1	YBL113C	1	YBL113C	0
YBL111C	YBL111C	2	2907	5009	-	ATAGCAATCAACATACTATTGTTAATTTCGAAACTTACAAAAATAAAATG	GGAAGCTTGGGTGCTGCAGAAAAGGTGTCTCGCACAAAGGAGTTTGTCAC	TTCCTTCAGTCACTAATTTCGTTCCGATGAGAACTTGCATGCTACCGTCA	ATAGCAATCAACATACTATTGTTAATTTCGAAACTTACAAAAATAAAATGCGGATCCCCGGGTTAATTAA	GGAAGCTTGGGTGCTGCAGAAAAGGTGTCTCGCACAAAGGAGTTTGTCACCGGATCCCCGGGTTAATTAA	TTCCTTCAGTCACTAATTTCGTTCCGATGAGAACTTGCATGCTACCGTCAGAATTCGAGCTCGTTTAAAC	0		0		0
YBL109W	YBL109W	2	5790	6125	+	CAGGAAATATTGCCTATTTTCGTACAAGGTTACTTCCTAGATGCTATATG	CTACCATCCACCATCTGCTACTCACCATACTGTTGTTCTACCCTCCATAT	TGGTAGGGTAAGTATATGTGTATTATTTACGATCATTTGTTAACGTTTCA	CAGGAAATATTGCCTATTTTCGTACAAGGTTACTTCCTAGATGCTATATGCGGATCCCCGGGTTAATTAA	CTACCATCCACCATCTGCTACTCACCATACTGTTGTTCTACCCTCCATATCGGATCCCCGGGTTAATTAA	TGGTAGGGTAAGTATATGTGTATTATTTACGATCATTTGTTAACGTTTCAGAATTCGAGCTCGTTTAAAC	0		0		0
YBL108C-A	PAU9	2	7605	7733	-	CAGTCGAAGTTGCTGAAGCCGTTTTCAACTACGGTGACTTCACCACCATG	CAGCCATCTCCAGTGCTCTATCCAAGGACGGTATCTACACTATCGCAAAC	ATTACTTTTCACTGTCTATGGATTTTCATTCGTAAAGGCATCACTCCCTA	CAGTCGAAGTTGCTGAAGCCGTTTTCAACTACGGTGACTTCACCACCATGCGGATCCCCGGGTTAATTAA	CAGCCATCTCCAGTGCTCTATCCAAGGACGGTATCTACACTATCGCAAACCGGATCCCCGGGTTAATTAA	ATTACTTTTCACTGTCTATGGATTTTCATTCGTAAAGGCATCACTCCCTAGAATTCGAGCTCGTTTAAAC	0		0		0
YBL108W	YBL108W	2	8174	8479	+	CTCACATATTCTCCATATCTCATCTTTCACACAATCTCATTATCTCTATG	CTAAACGGTTTCCATGCAAAGCAACATCTTTGTTACTCATTCCTGAAGGT	AGAATCTAACAATATACGACTCCCTGCACATGGTTGCTATTTTTTATTCA	CTCACATATTCTCCATATCTCATCTTTCACACAATCTCATTATCTCTATGCGGATCCCCGGGTTAATTAA	CTAAACGGTTTCCATGCAAAGCAACATCTTTGTTACTCATTCCTGAAGGTCGGATCCCCGGGTTAATTAA	AGAATCTAACAATATACGACTCCCTGCACATGGTTGCTATTTTTTATTCAGAATTCGAGCTCGTTTAAAC	0		0		0
YBL107W-A	YBL107W-A	2	9265	9369	+	AAGGATTGATAATGTAATAGGATCAATGAATATTAACATATAAAACGATG	TTCCTAAATCCTGGAGGAGAACTTCTAGTATATCTACATACCTAATATTA	AGAATGTGGATTTTGATGTAATTGTTGGGATTCCATTGTGATTAAGGCTA	AAGGATTGATAATGTAATAGGATCAATGAATATTAACATATAAAACGATGCGGATCCCCGGGTTAATTAA	TTCCTAAATCCTGGAGGAGAACTTCTAGTATATCTACATACCTAATATTACGGATCCCCGGGTTAATTAA	AGAATGTGGATTTTGATGTAATTGTTGGGATTCCATTGTGATTAAGGCTAGAATTCGAGCTCGTTTAAAC	0		0		0
YBL107C	YBL107C	2	9958	10548	-	AGTTAGAAAAAAAACTTCTCATTTATACACGTAGACAAAAAGACGGTATG	AAAATAATGACTACTTGAAGGAGTTTACGCAATTCTGCAAGGACAACAGT	AATCTTTAAGTGATATAATCTTTCAGCGGACTAGAAGAATAGGGCGTTCA	AGTTAGAAAAAAAACTTCTCATTTATACACGTAGACAAAAAGACGGTATGCGGATCCCCGGGTTAATTAA	AAAATAATGACTACTTGAAGGAGTTTACGCAATTCTGCAAGGACAACAGTCGGATCCCCGGGTTAATTAA	AATCTTTAAGTGATATAATCTTTCAGCGGACTAGAAGAATAGGGCGTTCAGAATTCGAGCTCGTTTAAAC	0		0		0
YBL106C	SRO77,SNI2,SOP2	2	10844	13876	-	ATAAAAGTTACAAAATTGTCAATTGAACAGATACAAAAATTTTATAAATG	ACGCAATGGAAGAAACGGGAAGGGATATGATGAAGAGCGCTGTAGGTTTT	TGCGAGCAAGGGCAACCTGATCGAATTTTATAAAAACTATTTATGGACTA	ATAAAAGTTACAAAATTGTCAATTGAACAGATACAAAAATTTTATAAATGCGGATCCCCGGGTTAATTAA	ACGCAATGGAAGAAACGGGAAGGGATATGATGAAGAGCGCTGTAGGTTTTCGGATCCCCGGGTTAATTAA	TGCGAGCAAGGGCAACCTGATCGAATTTTATAAAAACTATTTATGGACTAGAATTCGAGCTCGTTTAAAC	0		0		0
YBL105C	PKC1,STT1,HPO2,CLY15	2	14238	17693	-	AGGAAAAGTAAGTATAGTATCACACATATAGGGAGCAGTTTACAGTCATG	AGCAAGAAGAGTTTAGAGGATTTTCCTTTATGCCAGATGATTTGGATTTA	TTAGATGTTTTATATAAAATTAAATAAATCATGGCATGACCTTTTCTTCA	AGGAAAAGTAAGTATAGTATCACACATATAGGGAGCAGTTTACAGTCATGCGGATCCCCGGGTTAATTAA	AGCAAGAAGAGTTTAGAGGATTTTCCTTTATGCCAGATGATTTGGATTTACGGATCCCCGGGTTAATTAA	TTAGATGTTTTATATAAAATTAAATAAATCATGGCATGACCTTTTCTTCAGAATTCGAGCTCGTTTAAAC	0		0		0
YBL104C	YBL104C	2	18174	21290	-	TACTGGTAGTCGTAAGTGCAGTATCACGAACGTATAGAAGAATAAACATG	ACAGACATAATGTTTGTCCCACTCCAGGTTGCACCTGCCAGTGTAATAAG	ATTGTGAGAATAAAGAGAAGTTGCAAGATTTGGTTTATTGTACAATACTA	TACTGGTAGTCGTAAGTGCAGTATCACGAACGTATAGAAGAATAAACATGCGGATCCCCGGGTTAATTAA	ACAGACATAATGTTTGTCCCACTCCAGGTTGCACCTGCCAGTGTAATAAGCGGATCCCCGGGTTAATTAA	ATTGTGAGAATAAAGAGAAGTTGCAAGATTTGGTTTATTGTACAATACTAGAATTCGAGCTCGTTTAAAC	0		0		0
YBL103C	RTG3	2	22073	23533	-	TACTCTTATTTTTTGTCAGGCGAACCTACTTCTTAAATAAGTGAAGAATG	GAGATGACAACTCTAATCCAGCTGACTATCTTTTAGAATTTGGTTCGGGG	CCTGACCTTTTTCAAATTTAATTTTTTCCCGCTAATAAGACCATAAACTA	TACTCTTATTTTTTGTCAGGCGAACCTACTTCTTAAATAAGTGAAGAATGCGGATCCCCGGGTTAATTAA	GAGATGACAACTCTAATCCAGCTGACTATCTTTTAGAATTTGGTTCGGGGCGGATCCCCGGGTTAATTAA	CCTGACCTTTTTCAAATTTAATTTTTTCCCGCTAATAAGACCATAAACTAGAATTCGAGCTCGTTTAAAC	0		0		0
YBL102W	SFT2	2	24095	24742	+	GCGTTTTTTTTTTTTGCTGGTAAAAAAAAAGAACAAGTGTGGAGAATATG	GGATGTTAAGCTCTGCTGGTGTCAATTCGGCAAGAGGTGTTCTGCGCATC	TTTTTCTTCTTCAACTAATCAATTCAATATGCACTATGAATGATAATTCA	GCGTTTTTTTTTTTTGCTGGTAAAAAAAAAGAACAAGTGTGGAGAATATGCGGATCCCCGGGTTAATTAA	GGATGTTAAGCTCTGCTGGTGTCAATTCGGCAAGAGGTGTTCTGCGCATCCGGATCCCCGGGTTAATTAA	TTTTTCTTCTTCAACTAATCAATTCAATATGCACTATGAATGATAATTCAGAATTCGAGCTCGTTTAAAC	0		0		0
YBL101C	ECM21	2	24943	28296	-	TTTAAATAGAGAAGAACAAGCAAGATTTTTCCCTACCCCTATTGGGCATG	ACGAGCCTCCGCGTTATGACGAAATAGTGCCTTTGATGAGTGATGAAGAA	TATAATTATCGTAGAATAATTCAAAAAAAAATAAAAAACGAAAAAATTCA	TTTAAATAGAGAAGAACAAGCAAGATTTTTCCCTACCCCTATTGGGCATGCGGATCCCCGGGTTAATTAA	ACGAGCCTCCGCGTTATGACGAAATAGTGCCTTTGATGAGTGATGAAGAACGGATCCCCGGGTTAATTAA	TATAATTATCGTAGAATAATTCAAAAAAAAATAAAAAACGAAAAAATTCAGAATTCGAGCTCGTTTAAAC	0		0		0
YBL100W-C	YBL100W-C	2	28424	28543	+	AAACGTGGCTTATCTCAGAGCTAAGACAGACCTTCCGAGCAATAATAATG	GCGGGAAAGTGGAGAACCCTTGGAAGAGTCAGATCAGAGATTGGAAAAAT	TATATCACTCACACTCGATTCACAGGATCTGTAGATATCCATTGGTCTTA	AAACGTGGCTTATCTCAGAGCTAAGACAGACCTTCCGAGCAATAATAATGCGGATCCCCGGGTTAATTAA	GCGGGAAAGTGGAGAACCCTTGGAAGAGTCAGATCAGAGATTGGAAAAATCGGATCCCCGGGTTAATTAA	TATATCACTCACACTCGATTCACAGGATCTGTAGATATCCATTGGTCTTAGAATTCGAGCTCGTTTAAAC	0		0		0
YBL100W-A	YBL100W-A	2	29932	31248	+	AGAACTTCTAGTATATCTACATACCTAATATTATAGCCTTAATCACAATG	NNNNNNNNNNNNNNNNNNNNNNNNNNNNNNNNNNNNNNNNNNNNNNNNNN	NNNNNNNNNNNNNNNNNNNNNNNNNNNNNNNNNNNNNNNNNNNNNNNNNN	AGAACTTCTAGTATATCTACATACCTAATATTATAGCCTTAATCACAATGCGGATCCCCGGGTTAATTAA	NNNNNNNNNNNNNNNNNNNNNNNNNNNNNNNNNNNNNNNNNNNNNNNNNNCGGATCCCCGGGTTAATTAA	NNNNNNNNNNNNNNNNNNNNNNNNNNNNNNNNNNNNNNNNNNNNNNNNNNGAATTCGAGCTCGTTTAAAC	1	YBL100W-B	1	YBL100W-B	0
YBL100W-B	YBL100W-B	2	29932	35245	+	AGAACTTCTAGTATATCTACATACCTAATATTATAGCCTTAATCACAATG	NNNNNNNNNNNNNNNNNNNNNNNNNNNNNNNNNNNNNNNNNNNNNNNNNN	ATGATAGTTGATTTTTATTCCAACATACCACCCATAATGTAATAGNNNNN	AGAACTTCTAGTATATCTACATACCTAATATTATAGCCTTAATCACAATGCGGATCCCCGGGTTAATTAA	NNNNNNNNNNNNNNNNNNNNNNNNNNNNNNNNNNNNNNNNNNNNNNNNNNCGGATCCCCGGGTTAATTAA	ATGATAGTTGATTTTTATTCCAACATACCACCCATAATGTAATAGNNNNNGAATTCGAGCTCGTTTAAAC	1	YBL100W-A	1	YBL100W-A	0
YBL100C	YBL100C	2	36986	37300	-	CCATACCTTTAACACCAGAGGAGAACTCGACCAATTCTTCAGCCTGAATG	CGTGTTTTTTTTATTTATTTTGTTACTGTTCTTGCGATAGTTATGAGAGC	GAAGTTTTTTTCCTCATCGCGAACCATTAGTATAACAGATTGATCGTTCA	CCATACCTTTAACACCAGAGGAGAACTCGACCAATTCTTCAGCCTGAATGCGGATCCCCGGGTTAATTAA	CGTGTTTTTTTTATTTATTTTGTTACTGTTCTTGCGATAGTTATGAGAGCCGGATCCCCGGGTTAATTAA	GAAGTTTTTTTCCTCATCGCGAACCATTAGTATAACAGATTGATCGTTCAGAATTCGAGCTCGTTTAAAC	1	YBL099W	1	YBL099W	0
YBL099W	ATP1	2	37050	38687	+	CGCAAGAACAGTAACAAAATAAATAAAAAAAACACGCACATATAATAATG	AATTGTTGGCATCTCTAAAGAGTGCTACTGAATCATTTGTTGCCACTTTT	TCTTTTTGAGACGTACCTTATATTCATTTTTATTTTTTTAGTTCACATTA	CGCAAGAACAGTAACAAAATAAATAAAAAAAACACGCACATATAATAATGCGGATCCCCGGGTTAATTAA	AATTGTTGGCATCTCTAAAGAGTGCTACTGAATCATTTGTTGCCACTTTTCGGATCCCCGGGTTAATTAA	TCTTTTTGAGACGTACCTTATATTCATTTTTATTTTTTTAGTTCACATTAGAATTCGAGCTCGTTTAAAC	1	YBL100C	1	YBL100C	0
YBL098W	BNA4	2	39142	40524	+	GACAGTTAAAAAATCACGTAGTCAGTTAATCTGTTTAACTTGAAAATATG	TATCTATTGGCGGTTACAAGCTTTTCAAATTTTTGACAAGAGAACGTTCC	TTAATAATCCTCTCCTAGCGTACACGGATGGCAAGAATAAACTGGCTTCA	GACAGTTAAAAAATCACGTAGTCAGTTAATCTGTTTAACTTGAAAATATGCGGATCCCCGGGTTAATTAA	TATCTATTGGCGGTTACAAGCTTTTCAAATTTTTGACAAGAGAACGTTCCCGGATCCCCGGGTTAATTAA	TTAATAATCCTCTCCTAGCGTACACGGATGGCAAGAATAAACTGGCTTCAGAATTCGAGCTCGTTTAAAC	0		0		0
YBL097W	BRN1	2	40828	43092	+	TTAGTGGACTTTTTGGAGCAAAAAAAACCAGCAGGTAGTTATATAAGATG	ATGACTTGATAGTGAATTATGAGGATCTAGCGACAACACAGGCAGCGTCA	CTTTGCAGCACAAAAAAAAAAAAAAAAAAAAAAAAAAAGATCATCAACTA	TTAGTGGACTTTTTGGAGCAAAAAAAACCAGCAGGTAGTTATATAAGATGCGGATCCCCGGGTTAATTAA	ATGACTTGATAGTGAATTATGAGGATCTAGCGACAACACAGGCAGCGTCACGGATCCCCGGGTTAATTAA	CTTTGCAGCACAAAAAAAAAAAAAAAAAAAAAAAAAAAGATCATCAACTAGAATTCGAGCTCGTTTAAAC	0		0		0
YBL096C	YBL096C	2	43171	43479	-	CCTGGGCCAACTTGTTGTAAACCTCGCTTTTCTCGATTTGAGCGAGGATG	ATAAATACCTTGTTTTATATCCACTTTTCGAAGCGGTCCCCTTTCGGCGA	TTTTTGTGCTGCAAAGTTTCTTAAAGCCTTCGGGCTTACGAAATCCTTTA	CCTGGGCCAACTTGTTGTAAACCTCGCTTTTCTCGATTTGAGCGAGGATGCGGATCCCCGGGTTAATTAA	ATAAATACCTTGTTTTATATCCACTTTTCGAAGCGGTCCCCTTTCGGCGACGGATCCCCGGGTTAATTAA	TTTTTGTGCTGCAAAGTTTCTTAAAGCCTTCGGGCTTACGAAATCCTTTAGAATTCGAGCTCGTTTAAAC	1	YBL095W	1	YBL095W	0
YBL095W	YBL095W	2	43274	44086	+	TATAGACAATGACCAAATGACAGGATAGATCGAGGGTGAGTTCCAATATG	TTCTCGTTGAGCCTACTTGGTTCAAATATTTTAAATGGCTTGATATGTTT	AATATTAATTAACACGGAATAGGCTATTTTGAGACAGGCATGCTTTTTCA	TATAGACAATGACCAAATGACAGGATAGATCGAGGGTGAGTTCCAATATGCGGATCCCCGGGTTAATTAA	TTCTCGTTGAGCCTACTTGGTTCAAATATTTTAAATGGCTTGATATGTTTCGGATCCCCGGGTTAATTAA	AATATTAATTAACACGGAATAGGCTATTTTGAGACAGGCATGCTTTTTCAGAATTCGAGCTCGTTTAAAC	2	YBL096C;YBL094C	2	YBL096C;YBL094C	0
YBL094C	YBL094C	2	43762	44094	-	GAATATAGAATATTAATTAACACGGAATAGGCTATTTTGAGACAGGCATG	ACAGCCTTGCAGTTACACCTCTTTTACTAGGCAACAAAGGGAAGCCACAA	AACGTCCATAAGGGCTTGTTGTCATTGTTGCTGGATGAAGCATTGTGCTA	GAATATAGAATATTAATTAACACGGAATAGGCTATTTTGAGACAGGCATGCGGATCCCCGGGTTAATTAA	ACAGCCTTGCAGTTACACCTCTTTTACTAGGCAACAAAGGGAAGCCACAACGGATCCCCGGGTTAATTAA	AACGTCCATAAGGGCTTGTTGTCATTGTTGCTGGATGAAGCATTGTGCTAGAATTCGAGCTCGTTTAAAC	1	YBL095W	1	YBL095W	0
YBL093C	ROX3,MED19,SSN7,NUT3	2	44253	44915	-	GAGTGCGAATAGCAATAGTAAGTGAACGAAAAAGGAATACGATAATAATG	CACCAACACATAGTGACAGTCATGAGGATATGAAAAGAAGGAGGCTGGAG	ACACTTGCTCTTTATTTATAGTGGGGCTGATATGCGATGGCGTAAAGCTA	GAGTGCGAATAGCAATAGTAAGTGAACGAAAAAGGAATACGATAATAATGCGGATCCCCGGGTTAATTAA	CACCAACACATAGTGACAGTCATGAGGATATGAAAAGAAGGAGGCTGGAGCGGATCCCCGGGTTAATTAA	ACACTTGCTCTTTATTTATAGTGGGGCTGATATGCGATGGCGTAAAGCTAGAATTCGAGCTCGTTTAAAC	0		0		0
YBL092W	RPL32	2	45975	46367	+	TTATACTAACAAACTTTTAATTTTCATTTTTTTTTTTTTTTGATTAGATG	CTTTGGGTATCAAGGTCACCAACCCAAAGGGTCGTTTGGCTTTGGAAGCT	AATTTAAAATTAAATGAAGGTTATTATTTTGTAAATCTTTATTTAATTTA	TTATACTAACAAACTTTTAATTTTCATTTTTTTTTTTTTTTGATTAGATGCGGATCCCCGGGTTAATTAA	CTTTGGGTATCAAGGTCACCAACCCAAAGGGTCGTTTGGCTTTGGAAGCTCGGATCCCCGGGTTAATTAA	AATTTAAAATTAAATGAAGGTTATTATTTTGTAAATCTTTATTTAATTTAGAATTCGAGCTCGTTTAAAC	0		0		0
YBL091C-A	SCS22	2	46562	47177	-	GTGGTATGACGACAGATAATATAAGCACTAGTTCAGACGAGTAAACAATG	CATTGCTTATCATCACCGTTATCGCATTGCTCGTCGGCTGGATATACTAC	AAAACTAGGGCATTCTTCCTCACTTTTAGTGATAAACTTTTGTAAACTCA	GTGGTATGACGACAGATAATATAAGCACTAGTTCAGACGAGTAAACAATGCGGATCCCCGGGTTAATTAA	CATTGCTTATCATCACCGTTATCGCATTGCTCGTCGGCTGGATATACTACCGGATCCCCGGGTTAATTAA	AAAACTAGGGCATTCTTCCTCACTTTTAGTGATAAACTTTTGTAAACTCAGAATTCGAGCTCGTTTAAAC	0		0		0
YBL091C	MAP2	2	47360	48625	-	GGGCTTTTACATCAACAAGTACTGTAGAAGCTCTACCGTATTGAAAAATG	TCTTGTTGCATGCTCACAAAAAGGAAGTCGTTTCGAAAGGTGATGACTAC	AGTATTCATATACCTAGTGAGGAGGCCATTTGAAAGCGCATTTTACCTCA	GGGCTTTTACATCAACAAGTACTGTAGAAGCTCTACCGTATTGAAAAATGCGGATCCCCGGGTTAATTAA	TCTTGTTGCATGCTCACAAAAAGGAAGTCGTTTCGAAAGGTGATGACTACCGGATCCCCGGGTTAATTAA	AGTATTCATATACCTAGTGAGGAGGCCATTTGAAAGCGCATTTTACCTCAGAATTCGAGCTCGTTTAAAC	0		0		0
YBL090W	MRP21,MRP50	2	48822	49355	+	GAAGAGTAAAAAATCTGTCAAATATCACCCATAAGAGCATAACCATAATG	GCTTCAAGAGGTTGATTGAAATTGTTAAAGATGCCAAGAGGAAAGGATAC	GAAATCAATGGCGAAAATTTCACAATATTCAAGAGTTGATGGTACGATTA	GAAGAGTAAAAAATCTGTCAAATATCACCCATAAGAGCATAACCATAATGCGGATCCCCGGGTTAATTAA	GCTTCAAGAGGTTGATTGAAATTGTTAAAGATGCCAAGAGGAAAGGATACCGGATCCCCGGGTTAATTAA	GAAATCAATGGCGAAAATTTCACAATATTCAAGAGTTGATGGTACGATTAGAATTCGAGCTCGTTTAAAC	0		0		0
YBL089W	AVT5	2	49571	50950	+	CGAACAGCAAGATAAAGTGGAAACGAAAAGTAAGCAGCTTCCTCAATATG	TAATGGTAGCTTCACTATCAGCGATTGTATTTTTGGGCACATCATCACAT	ATACTTCTTTTTTTTGTTTATAGAAATACGAAAAGTAATGTACAAACTCA	CGAACAGCAAGATAAAGTGGAAACGAAAAGTAAGCAGCTTCCTCAATATGCGGATCCCCGGGTTAATTAA	TAATGGTAGCTTCACTATCAGCGATTGTATTTTTGGGCACATCATCACATCGGATCCCCGGGTTAATTAA	ATACTTCTTTTTTTTGTTTATAGAAATACGAAAAGTAATGTACAAACTCAGAATTCGAGCTCGTTTAAAC	0		0		0
YBL088C	TEL1	2	51016	59379	-	GAAAAAAAAGCCTTCAAAGAAAAAGGGAAATCAGTGTAACATAGACGATG	CGGATCCATCAAATTTGAGTGTTATATATATGGGATGGTCACCTTTTTAT	GTATTTCTATAAACAAAAAAAAGAAGTATAAAGCATCTGCATAGCAATTA	GAAAAAAAAGCCTTCAAAGAAAAAGGGAAATCAGTGTAACATAGACGATGCGGATCCCCGGGTTAATTAA	CGGATCCATCAAATTTGAGTGTTATATATATGGGATGGTCACCTTTTTATCGGATCCCCGGGTTAATTAA	GTATTTCTATAAACAAAAAAAAGAAGTATAAAGCATCTGCATAGCAATTAGAATTCGAGCTCGTTTAAAC	0		0		0
YBL087C	RPL23A	2	59819	60736	-	AGGTCTTACAAGCAATACAAAACCAACACACCTATATATAACTAATAATG	AATGTGCCGATTTATGGCCAAGAGTTGCATCTAACTCCGGTGTTGTTGTG	ATATATAATTGAAGAATCTAAGAGTATGAGTCAAAATAATTTCCTTTTTA	AGGTCTTACAAGCAATACAAAACCAACACACCTATATATAACTAATAATGCGGATCCCCGGGTTAATTAA	AATGTGCCGATTTATGGCCAAGAGTTGCATCTAACTCCGGTGTTGTTGTGCGGATCCCCGGGTTAATTAA	ATATATAATTGAAGAATCTAAGAGTATGAGTCAAAATAATTTCCTTTTTAGAATTCGAGCTCGTTTAAAC	0		0		0
YBL086C	YBL086C	2	61199	62599	-	GTATTAGGTACCCAAGAAAGGTATAATACCGCTCACAAAATATTAAGATG	CAGATAGAATAAGAGAAAACAAAAACTGGTCTATAATAACCCCATCGGGC	GGTATTGCAAGCTTAAGATTATAATTACATAAAACAATACAAATATTCTA	GTATTAGGTACCCAAGAAAGGTATAATACCGCTCACAAAATATTAAGATGCGGATCCCCGGGTTAATTAA	CAGATAGAATAAGAGAAAACAAAAACTGGTCTATAATAACCCCATCGGGCCGGATCCCCGGGTTAATTAA	GGTATTGCAAGCTTAAGATTATAATTACATAAAACAATACAAATATTCTAGAATTCGAGCTCGTTTAAAC	0		0		0
YBL085W	BOI1,BOB1,GIN7	2	63873	66815	+	TCTAACTCGAGGTGACCGGAGGCCACTGTAATAATAAAAAATAGAAGATG	CCAGCGATTACCTGGAAAGTTCAGCATTTGAATACCCTGGTGGCAGACTT	TATTAAGGTGTTTAAGTTGGTCAAGAAGTAACTAATGATTGCAGTTCTCA	TCTAACTCGAGGTGACCGGAGGCCACTGTAATAATAAAAAATAGAAGATGCGGATCCCCGGGTTAATTAA	CCAGCGATTACCTGGAAAGTTCAGCATTTGAATACCCTGGTGGCAGACTTCGGATCCCCGGGTTAATTAA	TATTAAGGTGTTTAAGTTGGTCAAGAAGTAACTAATGATTGCAGTTCTCAGAATTCGAGCTCGTTTAAAC	0		0		0
YBL084C	CDC27,SNB1,APC3	2	67166	69442	-	CATAAATCGACACGAACTTTTCGTGCAGGATACATAATAAAAATAGCATG	AGGGTAACCAAGTTATCATCGATGAATTACAAAAATGTCATATGCAAGAA	AAAACATTTAACATGTTTCAATTTGTTATGTTTTGGCCAACCTGCGTTTA	CATAAATCGACACGAACTTTTCGTGCAGGATACATAATAAAAATAGCATGCGGATCCCCGGGTTAATTAA	AGGGTAACCAAGTTATCATCGATGAATTACAAAAATGTCATATGCAAGAACGGATCCCCGGGTTAATTAA	AAAACATTTAACATGTTTCAATTTGTTATGTTTTGGCCAACCTGCGTTTAGAATTCGAGCTCGTTTAAAC	0		0		0
YBL083C	YBL083C	2	69710	70135	-	CTCACCACACTGTTCGTCACAAGATACCCTCGCATCCTGCCCGATTTATG	AAAAAGCTCAACTGAAACAGATGTATAAATATCATATAATCGTATTGTTT	CACCATTAAATACTAGTAGTACTATATAGATGGTATAAAGAAATGATTTA	CTCACCACACTGTTCGTCACAAGATACCCTCGCATCCTGCCCGATTTATGCGGATCCCCGGGTTAATTAA	AAAAAGCTCAACTGAAACAGATGTATAAATATCATATAATCGTATTGTTTCGGATCCCCGGGTTAATTAA	CACCATTAAATACTAGTAGTACTATATAGATGGTATAAAGAAATGATTTAGAATTCGAGCTCGTTTAAAC	1	YBL082C	1	YBL082C	0
YBL082C	ALG3,RHK1	2	69748	71124	-	TATCATAGAGTGTGTATGGGAGAGAGAAAGAGTTAGATACTAGTAGTATG	TCGCCAAAAGCCATCTTCGTACCACCAGCTCTATGGAAAAAAAGCTCAAC	AGAAATGATTTAAAACAATACGATTATATGATATTTATACATCTGTTTCA	TATCATAGAGTGTGTATGGGAGAGAGAAAGAGTTAGATACTAGTAGTATGCGGATCCCCGGGTTAATTAA	TCGCCAAAAGCCATCTTCGTACCACCAGCTCTATGGAAAAAAAGCTCAACCGGATCCCCGGGTTAATTAA	AGAAATGATTTAAAACAATACGATTATATGATATTTATACATCTGTTTCAGAATTCGAGCTCGTTTAAAC	1	YBL083C	1	YBL083C	0
YBL081W	YBL081W	2	71863	72969	+	AATTTTCTTTTTTTTTTTTGGCTCTATTTCACTAAGACATCGTATATATG	CATCATCAAGACCCTTTGGCATTTGGAATACTGACATGAGCGTTTGGAGT	TAGTAATACTAATGATAATAATATACATAAAAATATACGTAAACATCTCA	AATTTTCTTTTTTTTTTTTGGCTCTATTTCACTAAGACATCGTATATATGCGGATCCCCGGGTTAATTAA	CATCATCAAGACCCTTTGGCATTTGGAATACTGACATGAGCGTTTGGAGTCGGATCCCCGGGTTAATTAA	TAGTAATACTAATGATAATAATATACATAAAAATATACGTAAACATCTCAGAATTCGAGCTCGTTTAAAC	0		0		0
YBL080C	PET112	2	73067	74692	-	GTTATTGTTAGCATTCCTGTCCAAAAAGACCAGAGTAGGAACTAGATATG	AGGCAAACGAATTCGAGAAAAAATTCAAAGAGATCTTAAATATTCAATGG	TTGTTATTATTTATGCACGGTTCCTATTTACACGCGGCGTTTATATTTTA	GTTATTGTTAGCATTCCTGTCCAAAAAGACCAGAGTAGGAACTAGATATGCGGATCCCCGGGTTAATTAA	AGGCAAACGAATTCGAGAAAAAATTCAAAGAGATCTTAAATATTCAATGGCGGATCCCCGGGTTAATTAA	TTGTTATTATTTATGCACGGTTCCTATTTACACGCGGCGTTTATATTTTAGAATTCGAGCTCGTTTAAAC	0		0		0
YBL079W	NUP170,NLE3	2	75256	79764	+	ACAAAAAAGCAGAGTGCGTTTATTACTTCTCTTTCTAGCGGTTGTTCATG	AGTACGTTAAGAACAGCGGCAATAATTTGGGGATTTGTTTCTACAAAGAA	AATATACACGTACATTACCCTGCTATCTATATGTCGAACATGAATTTTTA	ACAAAAAAGCAGAGTGCGTTTATTACTTCTCTTTCTAGCGGTTGTTCATGCGGATCCCCGGGTTAATTAA	AGTACGTTAAGAACAGCGGCAATAATTTGGGGATTTGTTTCTACAAAGAACGGATCCCCGGGTTAATTAA	AATATACACGTACATTACCCTGCTATCTATATGTCGAACATGAATTTTTAGAATTCGAGCTCGTTTAAAC	0		0		0
YBL078C	ATG8,AUT7,CVT5,APG8	2	80375	80728	-	AATAATTGTAAAGTTGAGAAAATCATAATAAAATAATTACTAGAGACATG	AGGACGGGTTTTTGTATGTCACTTACTCAGGAGAAAATACATTTGGCAGG	AATTTCGATTTTAGATGTTAACGCTTCATTTCTTTTCATATAAAAGACTA	AATAATTGTAAAGTTGAGAAAATCATAATAAAATAATTACTAGAGACATGCGGATCCCCGGGTTAATTAA	AGGACGGGTTTTTGTATGTCACTTACTCAGGAGAAAATACATTTGGCAGGCGGATCCCCGGGTTAATTAA	AATTTCGATTTTAGATGTTAACGCTTCATTTCTTTTCATATAAAAGACTAGAATTCGAGCTCGTTTAAAC	0		0		0
YBL077W	YBL077W	2	80894	81325	+	ATTTTTGCCGCCGCCGAAAATAACCGGCCTCCGGGTGATGATATATCATG	GGATTCTGTTGACCAGCTCTCTTGCGAGACCTTCACTCTTTAGTTCAGAG	GAAACCAGAACCGACCAAGACGTGTTAATCATCATGGATACAAATATTTA	ATTTTTGCCGCCGCCGAAAATAACCGGCCTCCGGGTGATGATATATCATGCGGATCCCCGGGTTAATTAA	GGATTCTGTTGACCAGCTCTCTTGCGAGACCTTCACTCTTTAGTTCAGAGCGGATCCCCGGGTTAATTAA	GAAACCAGAACCGACCAAGACGTGTTAATCATCATGGATACAAATATTTAGAATTCGAGCTCGTTTAAAC	1	YBL076C	1	YBL076C	0
YBL076C	ILS1	2	81040	84258	-	CGACTTCCTACAACCTTTAGCCAAAAGCTTCAAAAAACCAAGGAAATATG	AAGAACAATCTATTAATGACACCATTTTCAAATTAAAAGTGTTCAAATTA	ATCACTTCGAGTAGAGAAAAATTTGTACGTATTTATATGAGTTGTTTTCA	CGACTTCCTACAACCTTTAGCCAAAAGCTTCAAAAAACCAAGGAAATATGCGGATCCCCGGGTTAATTAA	AAGAACAATCTATTAATGACACCATTTTCAAATTAAAAGTGTTCAAATTACGGATCCCCGGGTTAATTAA	ATCACTTCGAGTAGAGAAAAATTTGTACGTATTTATATGAGTTGTTTTCAGAATTCGAGCTCGTTTAAAC	1	YBL077W	1	YBL077W	0
YBL075C	SSA3,YG106	2	84496	86445	-	GTTTGTCACTAAACGGATAGAATAGGTACTAAACGCTACAAAGAAAAATG	GTGCTACGGGAGGTGGAGAAGATACAGGTCCAACAGTGGAAGAGGTTGAT	AAGGTTAAACATAAAAAGTAGCTAAATAGAACACTATAGAAGAATAATCA	GTTTGTCACTAAACGGATAGAATAGGTACTAAACGCTACAAAGAAAAATGCGGATCCCCGGGTTAATTAA	GTGCTACGGGAGGTGGAGAAGATACAGGTCCAACAGTGGAAGAGGTTGATCGGATCCCCGGGTTAATTAA	AAGGTTAAACATAAAAAGTAGCTAAATAGAACACTATAGAAGAATAATCAGAATTCGAGCTCGTTTAAAC	0		0		0
YBL074C	AAR2	2	86719	87786	-	TTATCGCTGGGACATGGGGCTAAAAAATAAAATATCGGAAGCCTGCAATG	ATGATGAGCACAACCCTACCATTGTTGGCGGTCTCTATTACCAAAGGCCA	TAGGCATCAAGTCAAATACGTTTGATGATAGCGCCGCACGATGATCGTTA	TTATCGCTGGGACATGGGGCTAAAAAATAAAATATCGGAAGCCTGCAATGCGGATCCCCGGGTTAATTAA	ATGATGAGCACAACCCTACCATTGTTGGCGGTCTCTATTACCAAAGGCCACGGATCCCCGGGTTAATTAA	TAGGCATCAAGTCAAATACGTTTGATGATAGCGCCGCACGATGATCGTTAGAATTCGAGCTCGTTTAAAC	1	YBL073W	1	YBL073W	0
YBL073W	YBL073W	2	87643	87954	+	ATTCTACAGTCAAACCAGTAGCCATACCTCATGCTGGAATTATCTGCATG	CGATTTTTTCCGCTTTCAAGATGTGTCCTTTCTTCATCTCTTGGTTCTTA	GGGATGTGAAAAGGAAAAAGTAATTAGGAGGGGTTTGCGGCGCCCTTTTA	ATTCTACAGTCAAACCAGTAGCCATACCTCATGCTGGAATTATCTGCATGCGGATCCCCGGGTTAATTAA	CGATTTTTTCCGCTTTCAAGATGTGTCCTTTCTTCATCTCTTGGTTCTTACGGATCCCCGGGTTAATTAA	GGGATGTGAAAAGGAAAAAGTAATTAGGAGGGGTTTGCGGCGCCCTTTTAGAATTCGAGCTCGTTTAAAC	1	YBL074C	1	YBL074C	0
YBL072C	RPS8A	2	88515	89117	-	TTTATTTTACTAACAAGCGTCATTAAATTTTCTATTACAGTTACAAAATG	TGGAAGGTGAAGAATTAGCTTTCTACCTAAGAAGATTGACTGCTAAGAAA	TATGAAGAGATGAGGAGAAGAAAAAATTGGTAGTATTTTCATTTCATCTA	TTTATTTTACTAACAAGCGTCATTAAATTTTCTATTACAGTTACAAAATGCGGATCCCCGGGTTAATTAA	TGGAAGGTGAAGAATTAGCTTTCTACCTAAGAAGATTGACTGCTAAGAAACGGATCCCCGGGTTAATTAA	TATGAAGAGATGAGGAGAAGAAAAAATTGGTAGTATTTTCATTTCATCTAGAATTCGAGCTCGTTTAAAC	0		0		0
YBL071C-B	YBL071C-B	2	89450	89548	-	GGAAAGCTTGAGGGCTTTCTCTTACGCAGTGTTCATGGTGTTACGGGATG	TAGGAAATTACACTTGCCATTTGCTTTTTGGTACTCACAAGAAGACGTTA	TTCCATTACTCATATGACCATAGCACATACTTTTTGTCCTGGTGTGTTTA	GGAAAGCTTGAGGGCTTTCTCTTACGCAGTGTTCATGGTGTTACGGGATGCGGATCCCCGGGTTAATTAA	TAGGAAATTACACTTGCCATTTGCTTTTTGGTACTCACAAGAAGACGTTACGGATCCCCGGGTTAATTAA	TTCCATTACTCATATGACCATAGCACATACTTTTTGTCCTGGTGTGTTTAGAATTCGAGCTCGTTTAAAC	0		0		0
YBL071W-A	KTI11,DPH3	2	89970	90218	+	TACCACGACTGTAAGCACATCATTTGTACAATACATTACCAGCTGAAATG	ACTACGAAGAGGCAGGCATCCACCCCCCTGAGCCTATTGCCGCTGCTGCC	AGCTCTTTCTTTATTTCTATTTGTATTCTCGATCTAGCCTCTCATCTTTA	TACCACGACTGTAAGCACATCATTTGTACAATACATTACCAGCTGAAATGCGGATCCCCGGGTTAATTAA	ACTACGAAGAGGCAGGCATCCACCCCCCTGAGCCTATTGCCGCTGCTGCCCGGATCCCCGGGTTAATTAA	AGCTCTTTCTTTATTTCTATTTGTATTCTCGATCTAGCCTCTCATCTTTAGAATTCGAGCTCGTTTAAAC	1	YBL071C	1	YBL071C	0
YBL071C	YBL071C	2	90215	90523	-	AGAAAAATCCCTCGCCTTTCCGGTGAAATTTGTCACAGCCATTTGAGATG	ATAGCTCTTTCTTTATTTCTATTTGTATTCTCGATCTAGCCTCTCATCTT	TACGAAGAGGCAGGCATCCACCCCCCTGAGCCTATTGCCGCTGCTGCCTA	AGAAAAATCCCTCGCCTTTCCGGTGAAATTTGTCACAGCCATTTGAGATGCGGATCCCCGGGTTAATTAA	ATAGCTCTTTCTTTATTTCTATTTGTATTCTCGATCTAGCCTCTCATCTTCGGATCCCCGGGTTAATTAA	TACGAAGAGGCAGGCATCCACCCCCCTGAGCCTATTGCCGCTGCTGCCTAGAATTCGAGCTCGTTTAAAC	1	YBL071W-A	1	YBL071W-A	0
YBL070C	YBL070C	2	90597	90917	-	TGTTCTTAGGAATAGGCGTCTTGATCTTCTTTTCATAAGAAAAATCCATG	CTTTGATTATAATATGTACTTTTATATATTTTCTTTATTTTTCATTATTT	GGAAAGGCGAGGGATTTTTCTGTTGACATTATCAAATTAGCTTTTTGTCA	TGTTCTTAGGAATAGGCGTCTTGATCTTCTTTTCATAAGAAAAATCCATGCGGATCCCCGGGTTAATTAA	CTTTGATTATAATATGTACTTTTATATATTTTCTTTATTTTTCATTATTTCGGATCCCCGGGTTAATTAA	GGAAAGGCGAGGGATTTTTCTGTTGACATTATCAAATTAGCTTTTTGTCAGAATTCGAGCTCGTTTAAAC	1	YBL069W	1	YBL069W	0
YBL069W	AST1	2	90733	92022	+	GGAAGCTACAAATACGACATTGCATACCAAGAGGCAAACGTTGAACAATG	TGGCCACTCAACGTGCCCAAGGAAAGTTAATCATGAACGTCGAAAAATTC	GTTCATTAAGTTTAAAAATAAAACATATTGTAAATGTAAGTGGGTATCTA	GGAAGCTACAAATACGACATTGCATACCAAGAGGCAAACGTTGAACAATGCGGATCCCCGGGTTAATTAA	TGGCCACTCAACGTGCCCAAGGAAAGTTAATCATGAACGTCGAAAAATTCCGGATCCCCGGGTTAATTAA	GTTCATTAAGTTTAAAAATAAAACATATTGTAAATGTAAGTGGGTATCTAGAATTCGAGCTCGTTTAAAC	2	YBL070C;YBL068W-A	2	YBL070C;YBL068W-A	0
YBL068W-A	YBL068W-A	2	91786	92022	+	AAGACATTTTCGATTCATGGGATAACCCAAGTGCCAATGCAAGAAAAATG	TGGCCACTCAACGTGCCCAAGGAAAGTTAATCATGAACGTCGAAAAATTC	GTTCATTAAGTTTAAAAATAAAACATATTGTAAATGTAAGTGGGTATCTA	AAGACATTTTCGATTCATGGGATAACCCAAGTGCCAATGCAAGAAAAATGCGGATCCCCGGGTTAATTAA	TGGCCACTCAACGTGCCCAAGGAAAGTTAATCATGAACGTCGAAAAATTCCGGATCCCCGGGTTAATTAA	GTTCATTAAGTTTAAAAATAAAACATATTGTAAATGTAAGTGGGTATCTAGAATTCGAGCTCGTTTAAAC	1	YBL069W	1	YBL069W	0
YBL068W	PRS4	2	92406	93386	+	TGCACATAGACTCTCAGCTTCAACTCCACAAGGCTTCTCCAGCAAAAATG	GACTACACAATGGTGAATCCGTGTCATATTTGTTCACCCATGCTCCAGTA	GTATTTAGGCATGCAAGCAATCAGGAATCTAAGAATAAAAAATTGTCCTA	TGCACATAGACTCTCAGCTTCAACTCCACAAGGCTTCTCCAGCAAAAATGCGGATCCCCGGGTTAATTAA	GACTACACAATGGTGAATCCGTGTCATATTTGTTCACCCATGCTCCAGTACGGATCCCCGGGTTAATTAA	GTATTTAGGCATGCAAGCAATCAGGAATCTAAGAATAAAAAATTGTCCTAGAATTCGAGCTCGTTTAAAC	0		0		0
YBL067C	UBP13	2	93631	95874	-	CCAGTACTTTCATTAACATACTAAACCCACGCAAGAAGGGCGCAATCATG	CCATAAAGTCTTCTAAAAAAAAGTCGAGAATGTTTAGTTTTAGGAAAAGC	TTAAAGGAGACGGTGAACCTTTACCTTCCTTGATATGCAAATATTTTTCA	CCAGTACTTTCATTAACATACTAAACCCACGCAAGAAGGGCGCAATCATGCGGATCCCCGGGTTAATTAA	CCATAAAGTCTTCTAAAAAAAAGTCGAGAATGTTTAGTTTTAGGAAAAGCCGGATCCCCGGGTTAATTAA	TTAAAGGAGACGGTGAACCTTTACCTTCCTTGATATGCAAATATTTTTCAGAATTCGAGCTCGTTTAAAC	0		0		0
YBL066C	SEF1	2	96661	100107	-	GGTCCCGTATACAGATTATATTGGCTCTGCGTATACGCATTCTCGTCATG	GTAATGATGACTTTTTTGGTTGGTTCGATATGAACATGGAACAAGGTTTT	AAAACAAGGGTAATAATATTTCTTAGAATATTAGAAGAATATAGGCGTTA	GGTCCCGTATACAGATTATATTGGCTCTGCGTATACGCATTCTCGTCATGCGGATCCCCGGGTTAATTAA	GTAATGATGACTTTTTTGGTTGGTTCGATATGAACATGGAACAAGGTTTTCGGATCCCCGGGTTAATTAA	AAAACAAGGGTAATAATATTTCTTAGAATATTAGAAGAATATAGGCGTTAGAATTCGAGCTCGTTTAAAC	1	YBL065W	1	YBL065W	0
YBL065W	YBL065W	2	99955	100299	+	CATTTGATTTTGTGCTGTCTACAATGTGTACATGAGGTAACTGGTCTATG	ATCCAATGAGCGGCCCTTCGTACGAGATGAGATATAATAAGAATGAAAGA	CTTTACTATATACAGGTATATGAAGTATCTCTAACTAAAACTTTTATCTA	CATTTGATTTTGTGCTGTCTACAATGTGTACATGAGGTAACTGGTCTATGCGGATCCCCGGGTTAATTAA	ATCCAATGAGCGGCCCTTCGTACGAGATGAGATATAATAAGAATGAAAGACGGATCCCCGGGTTAATTAA	CTTTACTATATACAGGTATATGAAGTATCTCTAACTAAAACTTTTATCTAGAATTCGAGCTCGTTTAAAC	1	YBL066C	1	YBL066C	0
YBL064C	PRX1	2	100363	101148	-	TTCTCGCAGTAGGATGAGATAAATTTCAAAGAAGCAGGAAGCAAAGGATG	TTGGTCAATTTAATGAAATTAAACCCTATTTAAGATTCACCAAGTCGAAA	GAGATACTTCATATACCTGTATATAGTAAAGTCGTTTATTTCAAAGCTTA	TTCTCGCAGTAGGATGAGATAAATTTCAAAGAAGCAGGAAGCAAAGGATGCGGATCCCCGGGTTAATTAA	TTGGTCAATTTAATGAAATTAAACCCTATTTAAGATTCACCAAGTCGAAACGGATCCCCGGGTTAATTAA	GAGATACTTCATATACCTGTATATAGTAAAGTCGTTTATTTCAAAGCTTAGAATTCGAGCTCGTTTAAAC	0		0		0
YBL063W	KIP1,CIN9	2	101878	105213	+	ACAGTTCGCGCTTCCCTCACTAAATATGGCGAGATAGTTAAACAATCATG	GAGAAGAAACTGAAAATAATGACATACTGCAAAATAAAAAACTTCATCAA	ACTCAATGCATATAGTGATACAAATATTTTACAATGGCTATATCCCCTTA	ACAGTTCGCGCTTCCCTCACTAAATATGGCGAGATAGTTAAACAATCATGCGGATCCCCGGGTTAATTAA	GAGAAGAAACTGAAAATAATGACATACTGCAAAATAAAAAACTTCATCAACGGATCCCCGGGTTAATTAA	ACTCAATGCATATAGTGATACAAATATTTTACAATGGCTATATCCCCTTAGAATTCGAGCTCGTTTAAAC	0		0		0
YBL062W	YBL062W	2	105300	105680	+	CATTGAGTGTAAACTGTTGCACCTATAAAGAATGAAAACAATCTAGTATG	ATGTTTCAGATTTTGAAGAAACTCTTGAATTTGACCCTACGTTACTTGTT	AAAAATAAAAGTATCAGTACTTTGAATTTATTCTCTACTGTGGACAGTCA	CATTGAGTGTAAACTGTTGCACCTATAAAGAATGAAAACAATCTAGTATGCGGATCCCCGGGTTAATTAA	ATGTTTCAGATTTTGAAGAAACTCTTGAATTTGACCCTACGTTACTTGTTCGGATCCCCGGGTTAATTAA	AAAAATAAAAGTATCAGTACTTTGAATTTATTCTCTACTGTGGACAGTCAGAATTCGAGCTCGTTTAAAC	1	YBL061C	1	YBL061C	0
YBL061C	SKT5,CSD4,CHS4,CAL2	2	105308	107398	-	AGGTTCTCGTCTTTTTTGGTGATAAAGTTAAAATAAAAGGATAAAAAATG	AGAACAAGAAGGATAAACAAGGTAAAAAAAAAAAAGACTGTGTAATTATG	GTAAACTGTTGCACCTATAAAGAATGAAAACAATCTAGTATGTGTACTTA	AGGTTCTCGTCTTTTTTGGTGATAAAGTTAAAATAAAAGGATAAAAAATGCGGATCCCCGGGTTAATTAA	AGAACAAGAAGGATAAACAAGGTAAAAAAAAAAAAGACTGTGTAATTATGCGGATCCCCGGGTTAATTAA	GTAAACTGTTGCACCTATAAAGAATGAAAACAATCTAGTATGTGTACTTAGAATTCGAGCTCGTTTAAAC	1	YBL062W	1	YBL062W	0
YBL060W	YEL1	2	107924	109987	+	GTACAATTTTGTGCAGTCAATGGACTATTAAGGGATCGCAAAGAGGTATG	GACTGAGCTACTTGAAAGCTTTGCAAAAAGCCATGGGTTCTGTTCAGTTC	TTTATATTTCTTCAGCGCAGTCTTTATATTTATATCTTTAAATATACTTA	GTACAATTTTGTGCAGTCAATGGACTATTAAGGGATCGCAAAGAGGTATGCGGATCCCCGGGTTAATTAA	GACTGAGCTACTTGAAAGCTTTGCAAAAAGCCATGGGTTCTGTTCAGTTCCGGATCCCCGGGTTAATTAA	TTTATATTTCTTCAGCGCAGTCTTTATATTTATATCTTTAAATATACTTAGAATTCGAGCTCGTTTAAAC	0		0		0
YBL059C-A	YBL059C-A	2	110117	110531	-	TTTACAAGTGCAGTTGAACAAAAGCAAGATAAGACAAGTACTACAACATG	GACAGTACGCCAAGAAAAAGCAGGAAAGTGACAATGATGCGAACTCGAAA	ATATTGAGATGATTTGTGTGAATGAAGTAGCGACAGAAAAAAAGCTTTTA	TTTACAAGTGCAGTTGAACAAAAGCAAGATAAGACAAGTACTACAACATGCGGATCCCCGGGTTAATTAA	GACAGTACGCCAAGAAAAAGCAGGAAAGTGACAATGATGCGAACTCGAAACGGATCCCCGGGTTAATTAA	ATATTGAGATGATTTGTGTGAATGAAGTAGCGACAGAAAAAAAGCTTTTAGAATTCGAGCTCGTTTAAAC	0		0		0
YBL059W	YBL059W	2	110586	111236	+	TACTTGTCTTATCTTGCTTTTGTTCAACTGCACTTGTAAATCAGTGAATG	AGCAAGTAGTGGACAGCTTAGTTAAGACACACAATTCATCTCTTTGTAAA	ATATAAGTAGTGGAATATATTATTGAAACTACTACTATGGTATAACACTA	TACTTGTCTTATCTTGCTTTTGTTCAACTGCACTTGTAAATCAGTGAATGCGGATCCCCGGGTTAATTAA	AGCAAGTAGTGGACAGCTTAGTTAAGACACACAATTCATCTCTTTGTAAACGGATCCCCGGGTTAATTAA	ATATAAGTAGTGGAATATATTATTGAAACTACTACTATGGTATAACACTAGAATTCGAGCTCGTTTAAAC	0		0		0
YBL058W	SHP1,UBX1	2	111429	112700	+	ATATATAAGAAACGTCGGTAGCACAACAATTAACTCATTATTTAGGTATG	CATTGAAGGACGCTGATCTGCTGAACTCCGTTGTCGTGCAAAGATGGGCA	ATATTAAGTTGAAGTCTTTTCCCGTTTCTGTTTTTGTATATTTATGCTCA	ATATATAAGAAACGTCGGTAGCACAACAATTAACTCATTATTTAGGTATGCGGATCCCCGGGTTAATTAA	CATTGAAGGACGCTGATCTGCTGAACTCCGTTGTCGTGCAAAGATGGGCACGGATCCCCGGGTTAATTAA	ATATTAAGTTGAAGTCTTTTCCCGTTTCTGTTTTTGTATATTTATGCTCAGAATTCGAGCTCGTTTAAAC	0		0		0
YBL057C	PTH2	2	112793	113436	-	AAGAGCTAATTGTTTCTTGCTATATTACTTGTTGACAGCGGAGTAACATG	CTGCTCCAAAAGCAGTATTGGATCAAATAACAGGTGATTTGAAATTGTAT	ATATAAATGCACGTATATCTATACCCGTAGTATATATCATTTGTACCTCA	AAGAGCTAATTGTTTCTTGCTATATTACTTGTTGACAGCGGAGTAACATGCGGATCCCCGGGTTAATTAA	CTGCTCCAAAAGCAGTATTGGATCAAATAACAGGTGATTTGAAATTGTATCGGATCCCCGGGTTAATTAA	ATATAAATGCACGTATATCTATACCCGTAGTATATATCATTTGTACCTCAGAATTCGAGCTCGTTTAAAC	0		0		0
YBL056W	PTC3	2	113754	115160	+	CAGACGAAGAAGGCCAAGAAGACAAATCGAAGAAAGAGAGAGATAACATG	ACGGCAAGAATGAAAATGCGAAGAAGGGTTCCAAGATTGAAGAAATTGAA	AAAGTTTGACTACTCTTTCGTTGCAAAGTACGGTTCGACAATATTTATTA	CAGACGAAGAAGGCCAAGAAGACAAATCGAAGAAAGAGAGAGATAACATGCGGATCCCCGGGTTAATTAA	ACGGCAAGAATGAAAATGCGAAGAAGGGTTCCAAGATTGAAGAAATTGAACGGATCCCCGGGTTAATTAA	AAAGTTTGACTACTCTTTCGTTGCAAAGTACGGTTCGACAATATTTATTAGAATTCGAGCTCGTTTAAAC	0		0		0
YBL055C	YBL055C	2	115565	116821	-	TTCGCTGCCAAGGCATTTTTTTGAGGCGCCAGTACTGTTATAGTTATATG	CTACTTTGATAGATACCACGTGGAAGACGACCTGTAAGATATTTGGAGAG	TGTACTTACTAAAAATAATGTAACTTTGCTCTTTGCACCAATAGATGTTA	TTCGCTGCCAAGGCATTTTTTTGAGGCGCCAGTACTGTTATAGTTATATGCGGATCCCCGGGTTAATTAA	CTACTTTGATAGATACCACGTGGAAGACGACCTGTAAGATATTTGGAGAGCGGATCCCCGGGTTAATTAA	TGTACTTACTAAAAATAATGTAACTTTGCTCTTTGCACCAATAGATGTTAGAATTCGAGCTCGTTTAAAC	0		0		0
YBL054W	YBL054W	2	117581	119158	+	GGGTAGAGAAAAGAATATATCACTGTTCTTATTGAAGTTCCCTCGCGATG	ATGAGCAAGATGAACTTCCAGGTATAAATTCTATCTTTAAAAATATATTT	GTACTCATTAAACGAATAGTCAAAACAAACTAAATTCGTCTCTTAGCTTA	GGGTAGAGAAAAGAATATATCACTGTTCTTATTGAAGTTCCCTCGCGATGCGGATCCCCGGGTTAATTAA	ATGAGCAAGATGAACTTCCAGGTATAAATTCTATCTTTAAAAATATATTTCGGATCCCCGGGTTAATTAA	GTACTCATTAAACGAATAGTCAAAACAAACTAAATTCGTCTCTTAGCTTAGAATTCGAGCTCGTTTAAAC	0		0		0
YBL053W	YBL053W	2	119327	119701	+	GAATTCTGTAATACTATTGACTACAAGGGTTCTTATTGCTATTAATAATG	CTTCATCCTGCTCTAAACTTGATATTCCAGTATCGTTTCTCCTAGCTGCA	TGGGAGCTCTGCTTCACTATTAAAAACTCCGAAACACCACTTGGAAATCA	GAATTCTGTAATACTATTGACTACAAGGGTTCTTATTGCTATTAATAATGCGGATCCCCGGGTTAATTAA	CTTCATCCTGCTCTAAACTTGATATTCCAGTATCGTTTCTCCTAGCTGCACGGATCCCCGGGTTAATTAA	TGGGAGCTCTGCTTCACTATTAAAAACTCCGAAACACCACTTGGAAATCAGAATTCGAGCTCGTTTAAAC	1	YBL052C	1	YBL052C	0
YBL052C	SAS3	2	119371	121866	-	TCTCTTCTTCCTTCTTCATTAATTAGTCTCCGTATAATTTGCAGATAATG	AGAGAGTCAGAAAAAGAAGAAAAATAACTCTAATAGAGGATGACGAAGAA	ATAATGTTACATGTATATGCTTATATCCAATATATACCCATCGCCGCTTA	TCTCTTCTTCCTTCTTCATTAATTAGTCTCCGTATAATTTGCAGATAATGCGGATCCCCGGGTTAATTAA	AGAGAGTCAGAAAAAGAAGAAAAATAACTCTAATAGAGGATGACGAAGAACGGATCCCCGGGTTAATTAA	ATAATGTTACATGTATATGCTTATATCCAATATATACCCATCGCCGCTTAGAATTCGAGCTCGTTTAAAC	1	YBL053W	1	YBL053W	0
YBL051C	PIN4,MDT1	2	122745	124751	-	AGAGGCAGGCTACAGACTAGGGAAAGCGTGTTCAACAACAATAAGAAATG	GTTCTTTAAGCGGACTGGATTTACAAAACCAAAACAAGAAGAATCTATGG	ACAAATACCAAACAAACTCTATAATCATAGAATAATGGAAGTATATATTA	AGAGGCAGGCTACAGACTAGGGAAAGCGTGTTCAACAACAATAAGAAATGCGGATCCCCGGGTTAATTAA	GTTCTTTAAGCGGACTGGATTTACAAAACCAAAACAAGAAGAATCTATGGCGGATCCCCGGGTTAATTAA	ACAAATACCAAACAAACTCTATAATCATAGAATAATGGAAGTATATATTAGAATTCGAGCTCGTTTAAAC	0		0		0
YBL050W	SEC17	2	125117	126110	+	GACTCGAGAATATAGTAAGAACACCATCATTAACCTGAAAGTTAAAAATG	TTTTGAATAAAATTAAGGAGTCCATCCAGCAACAAGAAGATGATTTGTTA	TTTATAATATATATGTATATATGTATGTGCGCGTAAGTATATGCCGTTCA	GACTCGAGAATATAGTAAGAACACCATCATTAACCTGAAAGTTAAAAATGCGGATCCCCGGGTTAATTAA	TTTTGAATAAAATTAAGGAGTCCATCCAGCAACAAGAAGATGATTTGTTACGGATCCCCGGGTTAATTAA	TTTATAATATATATGTATATATGTATGTGCGCGTAAGTATATGCCGTTCAGAATTCGAGCTCGTTTAAAC	0		0		0
YBL049W	MOH1	2	126819	127235	+	AGCAGCACTGAAGGAAAAGGGAGAAGCTTATCTTACTGTAGAAGAAAATG	ATAAGGAAGGAAAGTTTATCTTAGAGCTGAAAAACATTTGTAAATGTACT	AAAGCACTAAAAGACGAGAGGTGCTAGATAGCAGACAAAGGAAGACATCA	AGCAGCACTGAAGGAAAAGGGAGAAGCTTATCTTACTGTAGAAGAAAATGCGGATCCCCGGGTTAATTAA	ATAAGGAAGGAAAGTTTATCTTAGAGCTGAAAAACATTTGTAAATGTACTCGGATCCCCGGGTTAATTAA	AAAGCACTAAAAGACGAGAGGTGCTAGATAGCAGACAAAGGAAGACATCAGAATTCGAGCTCGTTTAAAC	0		0		0
YBL048W	YBL048W	2	127290	127601	+	CTTTGTCTGCTATCTAGCACCTCTCGTCTTTTAGTGCTTTTTAGCGTATG	TCTTACTTTACTTTTTTTGTATTTTCAATAATGTCGTGTTTCCCATGTTG	CACTAACCAAAAAAAAAAAAAGCTCTACCACATAATCTTTGGGCGTATTA	CTTTGTCTGCTATCTAGCACCTCTCGTCTTTTAGTGCTTTTTAGCGTATGCGGATCCCCGGGTTAATTAA	TCTTACTTTACTTTTTTTGTATTTTCAATAATGTCGTGTTTCCCATGTTGCGGATCCCCGGGTTAATTAA	CACTAACCAAAAAAAAAAAAAGCTCTACCACATAATCTTTGGGCGTATTAGAATTCGAGCTCGTTTAAAC	0		0		0
YBL047C	EDE1,BUD15	2	127886	132031	-	CCTGTTTTTATCTGTGTGTTTTCAATAGGATTCGAACGATATAGGCCATG	AGTGCAACTGGGATCTAGAAGCCGCCACTAACTTTTTGTTGGATAGTGCT	GCTTCGAGGAAGAAGTACAAAAAGAAGACGAAATGGTCCATTACAGACTA	CCTGTTTTTATCTGTGTGTTTTCAATAGGATTCGAACGATATAGGCCATGCGGATCCCCGGGTTAATTAA	AGTGCAACTGGGATCTAGAAGCCGCCACTAACTTTTTGTTGGATAGTGCTCGGATCCCCGGGTTAATTAA	GCTTCGAGGAAGAAGTACAAAAAGAAGACGAAATGGTCCATTACAGACTAGAATTCGAGCTCGTTTAAAC	0		0		0
YBL046W	PSY4	2	132415	133740	+	ATTTTTTGTTGGTGTTCTCATCGATTGTCAAAGCACAATAAAAAGCTATG	GTATTACCTACCGTGAGAATATTAGCAGTCCATTAGGCAAGAAGTCCAGA	TGATATTATGCAAATGGGAAGTTGTTGGTAGAGAAGTCATCTCTCGATCA	ATTTTTTGTTGGTGTTCTCATCGATTGTCAAAGCACAATAAAAAGCTATGCGGATCCCCGGGTTAATTAA	GTATTACCTACCGTGAGAATATTAGCAGTCCATTAGGCAAGAAGTCCAGACGGATCCCCGGGTTAATTAA	TGATATTATGCAAATGGGAAGTTGTTGGTAGAGAAGTCATCTCTCGATCAGAATTCGAGCTCGTTTAAAC	0		0		0
YBL045C	COR1,QCR1	2	134134	135507	-	TCACCATATCACTGAGAAAGAAAACACAAGATATATAAACAAAAAAAATG	GGTTATTAGATTACATGAGAATCAGAAGTGACATGTCCATGATGAGATGG	TTGCTTATTTCTATTTTATGTGCATGGAAAATATATTATCACACATCTTA	TCACCATATCACTGAGAAAGAAAACACAAGATATATAAACAAAAAAAATGCGGATCCCCGGGTTAATTAA	GGTTATTAGATTACATGAGAATCAGAAGTGACATGTCCATGATGAGATGGCGGATCCCCGGGTTAATTAA	TTGCTTATTTCTATTTTATGTGCATGGAAAATATATTATCACACATCTTAGAATTCGAGCTCGTTTAAAC	0		0		0
YBL044W	YBL044W	2	135989	136357	+	GAATATCTGGTTTTAAAATCTCTCTTTTCTTTTTCCCCCTGGTGGGTATG	CGGGTCAGAAACTTCGAGGAAGCTGTGACAATTGGAAAAAAAGGCAAAAC	ATCCGAAAACATCACAAATAATGCATGGGCAACCGGATACATTGCATTTA	GAATATCTGGTTTTAAAATCTCTCTTTTCTTTTTCCCCCTGGTGGGTATGCGGATCCCCGGGTTAATTAA	CGGGTCAGAAACTTCGAGGAAGCTGTGACAATTGGAAAAAAAGGCAAAACCGGATCCCCGGGTTAATTAA	ATCCGAAAACATCACAAATAATGCATGGGCAACCGGATACATTGCATTTAGAATTCGAGCTCGTTTAAAC	0		0		0
YBL043W	ECM13	2	136679	137452	+	TATTTATTGTTTTTCTCACATAGAAAATTCCGCATACTGCGATTATAATG	ACGATGGTTCCGTACCATTAACGAGATTTCATTCTTGTCCTATCACAGCA	GAATATGATAATGCAAAACGAAGTTGTGTTATTTCCTTCATTTTAATTTA	TATTTATTGTTTTTCTCACATAGAAAATTCCGCATACTGCGATTATAATGCGGATCCCCGGGTTAATTAA	ACGATGGTTCCGTACCATTAACGAGATTTCATTCTTGTCCTATCACAGCACGGATCCCCGGGTTAATTAA	GAATATGATAATGCAAAACGAAGTTGTGTTATTTCCTTCATTTTAATTTAGAATTCGAGCTCGTTTAAAC	0		0		0
YBL042C	FUI1	2	138332	140251	-	AAAGGCGGTAACTAGTCCTCTCATTCATTAATTCTATATAAGAGAAAATG	TTGAAGAATATGGCGGCGTTTCCACTGGCTATGAAAAGATACGATATATC	TTGACATTATCATGATAAGGTGCTACTTGCGTTGTTAACAATTGTGTTTA	AAAGGCGGTAACTAGTCCTCTCATTCATTAATTCTATATAAGAGAAAATGCGGATCCCCGGGTTAATTAA	TTGAAGAATATGGCGGCGTTTCCACTGGCTATGAAAAGATACGATATATCCGGATCCCCGGGTTAATTAA	TTGACATTATCATGATAAGGTGCTACTTGCGTTGTTAACAATTGTGTTTAGAATTCGAGCTCGTTTAAAC	0		0		0
YBL041W	PRE7,PRS3	2	141238	141963	+	TGGAAAGAGAGTAGCCAAGACTATTGAACTATAAAGTTAAACAAAATATG	TTGTCACCAAGGATGGTGTAAGGAAAGAATTTTATGAGCTAAAAAGAGAT	TGATGTTGATATTGGTCTATTTCTTTTTATACTATGATATGTATGCATTA	TGGAAAGAGAGTAGCCAAGACTATTGAACTATAAAGTTAAACAAAATATGCGGATCCCCGGGTTAATTAA	TTGTCACCAAGGATGGTGTAAGGAAAGAATTTTATGAGCTAAAAAGAGATCGGATCCCCGGGTTAATTAA	TGATGTTGATATTGGTCTATTTCTTTTTATACTATGATATGTATGCATTAGAATTCGAGCTCGTTTAAAC	0		0		0
YBL040C	ERD2	2	142103	142859	-	GTTCAAGAGTGAGATATACGCGCAAGTTGAGGCATAATCAGTAAGCAATG	ACATTTACTACACTAAAGTCATCAGAGGAAAGGGTTTCAAACTGCCAAAA	AAATTTGTATATATTGCTGCGAACACTATTTAAAACAGGTTTTTTTTTTA	GTTCAAGAGTGAGATATACGCGCAAGTTGAGGCATAATCAGTAAGCAATGCGGATCCCCGGGTTAATTAA	ACATTTACTACACTAAAGTCATCAGAGGAAAGGGTTTCAAACTGCCAAAACGGATCCCCGGGTTAATTAA	AAATTTGTATATATTGCTGCGAACACTATTTAAAACAGGTTTTTTTTTTAGAATTCGAGCTCGTTTAAAC	0		0		0
YBL039W-B	YBL039W-B	2	143384	143563	+	GTAGCGTGAATAACAATTTACTTTAATCAATCGTTAGGATACTTCTAATG	CATCACCTACAATCGACTTCAACTCGAAGAGTAAGAAAAAAAATGATAAA	AAATAATTTTCCATGGCGTGCTTTTACCAAAGTACTGAACAGGGAGATTA	GTAGCGTGAATAACAATTTACTTTAATCAATCGTTAGGATACTTCTAATGCGGATCCCCGGGTTAATTAA	CATCACCTACAATCGACTTCAACTCGAAGAGTAAGAAAAAAAATGATAAACGGATCCCCGGGTTAATTAA	AAATAATTTTCCATGGCGTGCTTTTACCAAAGTACTGAACAGGGAGATTAGAATTCGAGCTCGTTTAAAC	0		0		0
YBL039C	URA7	2	143980	145719	-	TTCTCAGTGAATTGGTCAATAGAACAAAAGAAACTTATAGACAGAAAATG	TCATTGAAGGTAAGTACGATCTTGAGGCCGGCGAAAACAAATTCAACTTT	AATTTATCTTTGTTAATGCAGTAGACTTTTAATTCTAAAATTTTGATTTA	TTCTCAGTGAATTGGTCAATAGAACAAAAGAAACTTATAGACAGAAAATGCGGATCCCCGGGTTAATTAA	TCATTGAAGGTAAGTACGATCTTGAGGCCGGCGAAAACAAATTCAACTTTCGGATCCCCGGGTTAATTAA	AATTTATCTTTGTTAATGCAGTAGACTTTTAATTCTAAAATTTTGATTTAGAATTCGAGCTCGTTTAAAC	1	YBL039C-A	1	YBL039C-A	0
YBL039C-A	YBL039C-A	2	144939	145022	-	TGAAACTTTGGATAAACCAACAATCGATAAGATTGCCATGTTTTGTCATG	CGATGTTAATTCTACTTATCACGTCCCATTGTTGCTACTGGAACAAAAGA	TGTAAGTGATATTTCATCTAACTTTAATCTGGCGTGTAAGTAATCAATCA	TGAAACTTTGGATAAACCAACAATCGATAAGATTGCCATGTTTTGTCATGCGGATCCCCGGGTTAATTAA	CGATGTTAATTCTACTTATCACGTCCCATTGTTGCTACTGGAACAAAAGACGGATCCCCGGGTTAATTAA	TGTAAGTGATATTTCATCTAACTTTAATCTGGCGTGTAAGTAATCAATCAGAATTCGAGCTCGTTTAAAC	1	YBL039C	1	YBL039C	0
YBL038W	MRPL16	2	146178	146876	+	AGTTGATTACCTTTCACCAGAGGTACAGAGGAATAGAATTTTGCAACATG	TGAATATTTTAAAGTCTCAAGAACCACAGTACAAACTCTTCAGAGGACGT	TATTTTTCAATAGTTATATACATGTATACATGGTGTGTTCAATCCGTTCA	AGTTGATTACCTTTCACCAGAGGTACAGAGGAATAGAATTTTGCAACATGCGGATCCCCGGGTTAATTAA	TGAATATTTTAAAGTCTCAAGAACCACAGTACAAACTCTTCAGAGGACGTCGGATCCCCGGGTTAATTAA	TATTTTTCAATAGTTATATACATGTATACATGGTGTGTTCAATCCGTTCAGAATTCGAGCTCGTTTAAAC	0		0		0
YBL037W	APL3	2	147200	150277	+	GAGTTTCCAATTTCGCAACCTTTATTATAGTACTAATCTTATAAGCCATG	GTCCCCTGGCGAAGTACATTGTCGAATGTATAAAGAATGTGCTTACGAAG	ATATGTACAATGCGGATGATTTTCATTATAGTGAATTTGAGAAAATTTTA	GAGTTTCCAATTTCGCAACCTTTATTATAGTACTAATCTTATAAGCCATGCGGATCCCCGGGTTAATTAA	GTCCCCTGGCGAAGTACATTGTCGAATGTATAAAGAATGTGCTTACGAAGCGGATCCCCGGGTTAATTAA	ATATGTACAATGCGGATGATTTTCATTATAGTGAATTTGAGAAAATTTTAGAATTCGAGCTCGTTTAAAC	0		0		0
YBL036C	YBL036C	2	150438	151211	-	GCATCACTCTTTCCTTTTTGACTAAGATTCCAGCATCACATTGCAATATG	GTACCGACATTTTTGGTGCTAGACCTCCAAAAAATGAAGCTAGAATCATT	CTATAAAAAAAAAGATCTTCGTATAAAATCTCAGTTCATTCAACCTACTA	GCATCACTCTTTCCTTTTTGACTAAGATTCCAGCATCACATTGCAATATGCGGATCCCCGGGTTAATTAA	GTACCGACATTTTTGGTGCTAGACCTCCAAAAAATGAAGCTAGAATCATTCGGATCCCCGGGTTAATTAA	CTATAAAAAAAAAGATCTTCGTATAAAATCTCAGTTCATTCAACCTACTAGAATTCGAGCTCGTTTAAAC	0		0		0
YBL035C	POL12	2	151484	153601	-	GCTTGAAGGTAAATTTAGGCAGGAGCAAGTGACTGAAAAAAAAAAAAATG	TTTATCTACACAACGTGTGGAAGCGCGCTAGAGTTGACTTGATTGCTAGT	TGGTGCTACCTTGAGCTATTCCATTAGTTAAGTTTGAATTAAATATATCA	GCTTGAAGGTAAATTTAGGCAGGAGCAAGTGACTGAAAAAAAAAAAAATGCGGATCCCCGGGTTAATTAA	TTTATCTACACAACGTGTGGAAGCGCGCTAGAGTTGACTTGATTGCTAGTCGGATCCCCGGGTTAATTAA	TGGTGCTACCTTGAGCTATTCCATTAGTTAAGTTTGAATTAAATATATCAGAATTCGAGCTCGTTTAAAC	0		0		0
YBL034C	STU1	2	153839	158380	-	CGGTAATTATTAGGGTTTTTGGAGAGACCTTGTATTCTTCAGAAATAATG	GTTTGCCTAAGAATGTCTTTAAAATGATCATGTTCATCGCCTCAAACGAA	GAGACGCGTCACGGTAAAAAAAAATTACGCGTCTACCACGCTATTCTCTA	CGGTAATTATTAGGGTTTTTGGAGAGACCTTGTATTCTTCAGAAATAATGCGGATCCCCGGGTTAATTAA	GTTTGCCTAAGAATGTCTTTAAAATGATCATGTTCATCGCCTCAAACGAACGGATCCCCGGGTTAATTAA	GAGACGCGTCACGGTAAAAAAAAATTACGCGTCTACCACGCTATTCTCTAGAATTCGAGCTCGTTTAAAC	0		0		0
YBL033C	RIB1	2	158647	159684	-	AGTCATTACAAAAAGTGGCGTACATAAAACTACAACAAACCTACAGGATG	ATCAAAACCGTATGAACTCTGCGTTGTCATCAACATCGACGCTGGCAATA	TTACAAAAAAAGCACTATATGTACTAATAATTATGCTACACTTGTGTTTA	AGTCATTACAAAAAGTGGCGTACATAAAACTACAACAAACCTACAGGATGCGGATCCCCGGGTTAATTAA	ATCAAAACCGTATGAACTCTGCGTTGTCATCAACATCGACGCTGGCAATACGGATCCCCGGGTTAATTAA	TTACAAAAAAAGCACTATATGTACTAATAATTATGCTACACTTGTGTTTAGAATTCGAGCTCGTTTAAAC	0		0		0
YBL032W	HEK2,KHD1	2	160175	161320	+	TCAACTGATCGGGTAACTTAGAGACAGCATTAGTATATATACCAGCCATG	AAGAGAAGGAAGAACCTCAAGAGAATCATGATAACAAAGAGGAGCAGTCG	GATAGTTTGTTTTGTCTGTGTGGGACGTGCGCACGCACACGTATATACTA	TCAACTGATCGGGTAACTTAGAGACAGCATTAGTATATATACCAGCCATGCGGATCCCCGGGTTAATTAA	AAGAGAAGGAAGAACCTCAAGAGAATCATGATAACAAAGAGGAGCAGTCGCGGATCCCCGGGTTAATTAA	GATAGTTTGTTTTGTCTGTGTGGGACGTGCGCACGCACACGTATATACTAGAATTCGAGCTCGTTTAAAC	0		0		0
YBL031W	SHE1	2	161689	162705	+	ACAATAAACATGCAATTACAGCTCTAGAACACATACTATCTTCATGGATG	TTAAGCAAAGTACTGCCGCCGGCACAAAGAGTGATAGACCTATTTGGCGG	GTCATCACATGATGTTTCTTATAAAATGCAATTTTTTTATTACTTAATCA	ACAATAAACATGCAATTACAGCTCTAGAACACATACTATCTTCATGGATGCGGATCCCCGGGTTAATTAA	TTAAGCAAAGTACTGCCGCCGGCACAAAGAGTGATAGACCTATTTGGCGGCGGATCCCCGGGTTAATTAA	GTCATCACATGATGTTTCTTATAAAATGCAATTTTTTTATTACTTAATCAGAATTCGAGCTCGTTTAAAC	0		0		0
YBL030C	PET9,OP1,ANC2,AAC2	2	163031	163987	-	TTTTATACTTCAGAATCATACATTAACATACATATAAGCAAATAGCCATG	TCTCAATGTACGACCAACTGCAAATGATCTTGTTTGGTAAGAAGTTCAAA	GGAAAATGTGAGAAAGAATTTAGATTAAGAATCAAGCCAGATTAGACTTA	TTTTATACTTCAGAATCATACATTAACATACATATAAGCAAATAGCCATGCGGATCCCCGGGTTAATTAA	TCTCAATGTACGACCAACTGCAAATGATCTTGTTTGGTAAGAAGTTCAAACGGATCCCCGGGTTAATTAA	GGAAAATGTGAGAAAGAATTTAGATTAAGAATCAAGCCAGATTAGACTTAGAATTCGAGCTCGTTTAAAC	0		0		0
YBL029C-A	YBL029C-A	2	164478	164762	-	AATCAGATAAGCAACTTAATACACAACCTCAAAAAGAAAAAATTACCATG	TTAATAAAGTCATTCAAGAACAACAAAACTTACGACAAAAGCAGCCCAAC	ATATATAAATACATATATAAGAGGAAGAAAAGGGAATTATTTCGTTATCA	AATCAGATAAGCAACTTAATACACAACCTCAAAAAGAAAAAATTACCATGCGGATCCCCGGGTTAATTAA	TTAATAAAGTCATTCAAGAACAACAAAACTTACGACAAAAGCAGCCCAACCGGATCCCCGGGTTAATTAA	ATATATAAATACATATATAAGAGGAAGAAAAGGGAATTATTTCGTTATCAGAATTCGAGCTCGTTTAAAC	0		0		0
YBL029W	YBL029W	2	166128	167258	+	AAAGCTTAGTCGTAATATATAGAGATTATAAAACCAAAATAAAGCTAATG	GGTTAAGAAGAGAGAGGAGAATGAAGCTTAAGGAACGTAAAAGAACAACC	TATATATGGATGAAATATATAATGCATTTTTTTTTTGGGTAATAAAATTA	AAAGCTTAGTCGTAATATATAGAGATTATAAAACCAAAATAAAGCTAATGCGGATCCCCGGGTTAATTAA	GGTTAAGAAGAGAGAGGAGAATGAAGCTTAAGGAACGTAAAAGAACAACCCGGATCCCCGGGTTAATTAA	TATATATGGATGAAATATATAATGCATTTTTTTTTTGGGTAATAAAATTAGAATTCGAGCTCGTTTAAAC	0		0		0
YBL028C	YBL028C	2	167512	167832	-	AAGAGTTCAGCATATAAAATAAGTTAAAACTTACTAGAACAAGAATCATG	AGGCTAAGCTGATGAAACAATCTAAGAAAAAAACTTCTTTCACTAGATTC	AAATTTTACAACCTAGCTCCTATCAAGTTCTTATTACCTTCATTTTATCA	AAGAGTTCAGCATATAAAATAAGTTAAAACTTACTAGAACAAGAATCATGCGGATCCCCGGGTTAATTAA	AGGCTAAGCTGATGAAACAATCTAAGAAAAAAACTTCTTTCACTAGATTCCGGATCCCCGGGTTAATTAA	AAATTTTACAACCTAGCTCCTATCAAGTTCTTATTACCTTCATTTTATCAGAATTCGAGCTCGTTTAAAC	0		0		0
YBL027W	RPL19B	2	168419	169372	+	ATCTTTTCACCAAATCGAATAAAAAGTCACCAATAAATTAGAGGAAAATG	GAGCTCAAAGAGTTGCTGAAAAGAGAGACGCTTTGCTAAAGGAAGACGCT	GAACAATGAGAAGGTACGTAATTTCTTAGCTAATTATTTGTAATCAATTA	ATCTTTTCACCAAATCGAATAAAAAGTCACCAATAAATTAGAGGAAAATGCGGATCCCCGGGTTAATTAA	GAGCTCAAAGAGTTGCTGAAAAGAGAGACGCTTTGCTAAAGGAAGACGCTCGGATCCCCGGGTTAATTAA	GAACAATGAGAAGGTACGTAATTTCTTAGCTAATTATTTGTAATCAATTAGAATTCGAGCTCGTTTAAAC	0		0		0
YBL026W	LSM2,SNP3,SMX5	2	170600	171015	+	ACAATACTTTCGAACACGTATCTCACGCTGATAACACCCTAGCAAGTATG	CGAATTTGCTACAAGACGCTACCAGAAGGGAGGTAATGACTGAAAGAAAA	TAAAAAACTAATGAGAAAAAATGCCATGAGGATAGACTGCATAATTCTTA	ACAATACTTTCGAACACGTATCTCACGCTGATAACACCCTAGCAAGTATGCGGATCCCCGGGTTAATTAA	CGAATTTGCTACAAGACGCTACCAGAAGGGAGGTAATGACTGAAAGAAAACGGATCCCCGGGTTAATTAA	TAAAAAACTAATGAGAAAAAATGCCATGAGGATAGACTGCATAATTCTTAGAATTCGAGCTCGTTTAAAC	0		0		0
YBL025W	RRN10	2	171458	171895	+	TAAGCACTATATTTCGAACGTTAACCTAAATCTCTCCCACTAAGAAAATG	GCGAATTCATATCAAAACATATTGATTATAGGCATGCGCCAGGTAATATC	AAAGCCTTCCATCCTCCCCAGCCGCAAAAGCCAGGTTTTTGTTACATTCA	TAAGCACTATATTTCGAACGTTAACCTAAATCTCTCCCACTAAGAAAATGCGGATCCCCGGGTTAATTAA	GCGAATTCATATCAAAACATATTGATTATAGGCATGCGCCAGGTAATATCCGGATCCCCGGGTTAATTAA	AAAGCCTTCCATCCTCCCCAGCCGCAAAAGCCAGGTTTTTGTTACATTCAGAATTCGAGCTCGTTTAAAC	0		0		0
YBL024W	NCL1,TRM4	2	172510	174558	+	AGCACTTCCTTTTATCTACACTGTAATCCGAAGAATACACTATAAGGATG	CCGCAGAAACTACTACCGGAACCTCTACTGAAGCTCCTAGCGCTGCTAAT	AATATACATTTACTTTACAGTGGAGGGGATAAGAAACATGATAACTATCA	AGCACTTCCTTTTATCTACACTGTAATCCGAAGAATACACTATAAGGATGCGGATCCCCGGGTTAATTAA	CCGCAGAAACTACTACCGGAACCTCTACTGAAGCTCCTAGCGCTGCTAATCGGATCCCCGGGTTAATTAA	AATATACATTTACTTTACAGTGGAGGGGATAAGAAACATGATAACTATCAGAATTCGAGCTCGTTTAAAC	0		0		0
YBL023C	MCM2	2	174889	177495	-	CTCTTTGCCTCTTTTCTAAGAAGTATAACACAACTACAATATAAGTGATG	GTGTTCGCCGCCAACTCCGCAGGTCTTTCGCAATTTATACCTTGGGTCAC	AGAATTTTTTATCTTCATATCCAGATATTCGTAGGAATAACAAAGTTTTA	CTCTTTGCCTCTTTTCTAAGAAGTATAACACAACTACAATATAAGTGATGCGGATCCCCGGGTTAATTAA	GTGTTCGCCGCCAACTCCGCAGGTCTTTCGCAATTTATACCTTGGGTCACCGGATCCCCGGGTTAATTAA	AGAATTTTTTATCTTCATATCCAGATATTCGTAGGAATAACAAAGTTTTAGAATTCGAGCTCGTTTAAAC	0		0		0
YBL022C	PIM1,LON1	2	177843	181244	-	TCTTTTGGTTTTCGAGGTGCCTGAACGAAAAGATTTGCAAATAAAGCATG	CAGTATGGAAGGCTGAATTTGAGATTTTGGATGCTAAAAAGGAAAAGGAC	TATTTACAGAATGTTTAAACAGGTATTTAATCCATTTAGATGAAAAGTTA	TCTTTTGGTTTTCGAGGTGCCTGAACGAAAAGATTTGCAAATAAAGCATGCGGATCCCCGGGTTAATTAA	CAGTATGGAAGGCTGAATTTGAGATTTTGGATGCTAAAAAGGAAAAGGACCGGATCCCCGGGTTAATTAA	TATTTACAGAATGTTTAAACAGGTATTTAATCCATTTAGATGAAAAGTTAGAATTCGAGCTCGTTTAAAC	0		0		0
YBL021C	HAP3	2	181629	182063	-	AGGACTAAGCTAGGTAGTAACACAAGTGGCACAAACCTCTCGAGAATATG	AGGCGCTCAAGAATCAACTAATGTATGAGCAGGACGACGAAGAGGTGCCT	TCCTGACAGCTAGCAACTTTTGCGATCTACCACCTGGTTTTGTCTTCTCA	AGGACTAAGCTAGGTAGTAACACAAGTGGCACAAACCTCTCGAGAATATGCGGATCCCCGGGTTAATTAA	AGGCGCTCAAGAATCAACTAATGTATGAGCAGGACGACGAAGAGGTGCCTCGGATCCCCGGGTTAATTAA	TCCTGACAGCTAGCAACTTTTGCGATCTACCACCTGGTTTTGTCTTCTCAGAATTCGAGCTCGTTTAAAC	0		0		0
YBL020W	RFT1	2	182370	184094	+	GGTGATCTGAAGTTGATTCTGCTTTTGTCAGTGAAGGAAAAGAAAAAATG	CCATACAATCTTTTATTAACAAGAGGGCGGTTTCCAATTCTAAAGATGTA	ATTTAAGCGCATATTATGTGTCGCCTAAGTTATATAAGAATTTTTGTTTA	GGTGATCTGAAGTTGATTCTGCTTTTGTCAGTGAAGGAAAAGAAAAAATGCGGATCCCCGGGTTAATTAA	CCATACAATCTTTTATTAACAAGAGGGCGGTTTCCAATTCTAAAGATGTACGGATCCCCGGGTTAATTAA	ATTTAAGCGCATATTATGTGTCGCCTAAGTTATATAAGAATTTTTGTTTAGAATTCGAGCTCGTTTAAAC	0		0		0
YBL019W	APN2,ETH1	2	184322	185884	+	AGAAGCTATTTCACCGTAAAGAAAATCCCTTTCCTTGTCAGGACACTATG	GGGGTGATTCAAATAATACAGAATCATCTTGTGGGTTTTTTCAGTGGGTT	GAAGAAAGTGTTTTATTCTCCCAAAATATCAGCTGACGTTCTCATATTTA	AGAAGCTATTTCACCGTAAAGAAAATCCCTTTCCTTGTCAGGACACTATGCGGATCCCCGGGTTAATTAA	GGGGTGATTCAAATAATACAGAATCATCTTGTGGGTTTTTTCAGTGGGTTCGGATCCCCGGGTTAATTAA	GAAGAAAGTGTTTTATTCTCCCAAAATATCAGCTGACGTTCTCATATTTAGAATTCGAGCTCGTTTAAAC	0		0		0
YBL018C	POP8	2	185967	186443	-	CAGAATAAGAAAAGGCAGATAAATAGTTTGATAAATGGCCAGTTGTGATG	TATGGCTGAAAAAAGTAATGGAAGAAGAAGAACAAGACTGTAAATGTATA	AACACTTTCTTCTATGCCCAAGTTTTTTTAAATAATAAACTGATATTCTA	CAGAATAAGAAAAGGCAGATAAATAGTTTGATAAATGGCCAGTTGTGATGCGGATCCCCGGGTTAATTAA	TATGGCTGAAAAAAGTAATGGAAGAAGAAGAACAAGACTGTAAATGTATACGGATCCCCGGGTTAATTAA	AACACTTTCTTCTATGCCCAAGTTTTTTTAAATAATAAACTGATATTCTAGAATTCGAGCTCGTTTAAAC	0		0		0
YBL017C	PEP1,VPT1,VPS10	2	186813	191552	-	CTGTATATCTGGAAAAGTCCTGAAGTGTCCAGTAGTCATCACACGTTATG	AGGAAAACATCGACAGGCCTGATTCTACAGCGCCATCTAACGAAAACCAG	TTTATGAAAAGTATATGGAATTATCTACTCTATGTAAAGTAATCTCTCTA	CTGTATATCTGGAAAAGTCCTGAAGTGTCCAGTAGTCATCACACGTTATGCGGATCCCCGGGTTAATTAA	AGGAAAACATCGACAGGCCTGATTCTACAGCGCCATCTAACGAAAACCAGCGGATCCCCGGGTTAATTAA	TTTATGAAAAGTATATGGAATTATCTACTCTATGTAAAGTAATCTCTCTAGAATTCGAGCTCGTTTAAAC	0		0		0
YBL016W	FUS3,DAC2	2	192420	193481	+	GTTTGAACTACAAGGAAATAAGGCAGAGAAAAAGAAAAGAAAATAATATG	CACTAACGACGAAAGACCTCAAGAAACTCATTTGGAACGAAATATTTAGT	ATATGTATACATTGTTCTTCGGGTTGATATTTTAATGATAATGATGGCTA	GTTTGAACTACAAGGAAATAAGGCAGAGAAAAAGAAAAGAAAATAATATGCGGATCCCCGGGTTAATTAA	CACTAACGACGAAAGACCTCAAGAAACTCATTTGGAACGAAATATTTAGTCGGATCCCCGGGTTAATTAA	ATATGTATACATTGTTCTTCGGGTTGATATTTTAATGATAATGATGGCTAGAATTCGAGCTCGTTTAAAC	0		0		0
YBL015W	ACH1	2	194089	195669	+	AAACAAACAACACATTTCTTTTTTTCTTTTTCACATATTGCACTAAAATG	ACTTAGCTGAAAAGGGTACAATGAAGGTCGACAGCTGGGAACCAGTTGAC	CTTTCTTTTTTTTGTTAAATACTCATCTCTCGGTTTGCGCACAAACACTA	AAACAAACAACACATTTCTTTTTTTCTTTTTCACATATTGCACTAAAATGCGGATCCCCGGGTTAATTAA	ACTTAGCTGAAAAGGGTACAATGAAGGTCGACAGCTGGGAACCAGTTGACCGGATCCCCGGGTTAATTAA	CTTTCTTTTTTTTGTTAAATACTCATCTCTCGGTTTGCGCACAAACACTAGAATTCGAGCTCGTTTAAAC	0		0		0
YBL014C	RRN6	2	199031	201715	-	GATGTGGCAAGTTGAAGTAAAGAGAGAAGGCGTTCTATGGGCTGAGCATG	GTAATTCTCAAAAAGCCAAAAAGAAGAAGAAAAGGATCCGGGGGTTTGGA	TTTATTACTTGTTACATTGTTTTGATTACCTGTGCACGCATTATACCTTA	GATGTGGCAAGTTGAAGTAAAGAGAGAAGGCGTTCTATGGGCTGAGCATGCGGATCCCCGGGTTAATTAA	GTAATTCTCAAAAAGCCAAAAAGAAGAAGAAAAGGATCCGGGGGTTTGGACGGATCCCCGGGTTAATTAA	TTTATTACTTGTTACATTGTTTTGATTACCTGTGCACGCATTATACCTTAGAATTCGAGCTCGTTTAAAC	0		0		0
YBL013W	FMT1	2	202023	203228	+	ACCTAGGCACCTCATAGTGAGAAGATTGAAAACGGCGTATCAAACAAATG	CGCGCCTGCGGAAAAGATGCGGCGCCCTGAGTGAAAAGTTAGTTTTCCTG	TGAAAGAAGGGAGAAGAAGAATACTAAAAGAGGAATGTAGAGCCGGGTTA	ACCTAGGCACCTCATAGTGAGAAGATTGAAAACGGCGTATCAAACAAATGCGGATCCCCGGGTTAATTAA	CGCGCCTGCGGAAAAGATGCGGCGCCCTGAGTGAAAAGTTAGTTTTCCTGCGGATCCCCGGGTTAATTAA	TGAAAGAAGGGAGAAGAAGAATACTAAAAGAGGAATGTAGAGCCGGGTTAGAATTCGAGCTCGTTTAAAC	0		0		0
YBL012C	YBL012C	2	203373	203774	-	TTCTTCACCTCGCCCATAAGGATTACAGGGTCGACGAACTGGTTAGCATG	CTGTTATGAACTACAAGCCATTACTAACATCAATCTTTCCGAATCATAAA	CTATGAAGAAAAAGAAAAGTAGGCCCGCCTTCTTTCCCAGTTGCAGTTTA	TTCTTCACCTCGCCCATAAGGATTACAGGGTCGACGAACTGGTTAGCATGCGGATCCCCGGGTTAATTAA	CTGTTATGAACTACAAGCCATTACTAACATCAATCTTTCCGAATCATAAACGGATCCCCGGGTTAATTAA	CTATGAAGAAAAAGAAAAGTAGGCCCGCCTTCTTTCCCAGTTGCAGTTTAGAATTCGAGCTCGTTTAAAC	1	YBL011W	1	YBL011W	0
YBL011W	SCT1,GAT2	2	203505	205784	+	TATATAGTAAAAAGAGCACAGGGGCGTTTACATCGGGGTAAAAAAAAATG	AGGAAGAAGAAGAAGAGGAAGAAGAAGAAGAAGGGAAAGAAGGAGATGCG	CGGCGAAAGATTTAGTTTCTAGTATCTTCACCGTCAGTAAATGGCATCTA	TATATAGTAAAAAGAGCACAGGGGCGTTTACATCGGGGTAAAAAAAAATGCGGATCCCCGGGTTAATTAA	AGGAAGAAGAAGAAGAGGAAGAAGAAGAAGAAGGGAAAGAAGGAGATGCGCGGATCCCCGGGTTAATTAA	CGGCGAAAGATTTAGTTTCTAGTATCTTCACCGTCAGTAAATGGCATCTAGAATTCGAGCTCGTTTAAAC	1	YBL012C	1	YBL012C	0
YBL010C	YBL010C	2	206074	206916	-	TTAAGGTGTAGCAAGATAGAAAAAGGCACCTCTTTCAAAGCAAGCAAATG	TGTATAACAAAAAGCGAAACAAAAAGAAAAGGTTCAGTTGGGTAGGATAC	TATTCTCTTCAAACTTCAACGTTCAACCTGCTTTGCCGAGACGGCGATTA	TTAAGGTGTAGCAAGATAGAAAAAGGCACCTCTTTCAAAGCAAGCAAATGCGGATCCCCGGGTTAATTAA	TGTATAACAAAAAGCGAAACAAAAAGAAAAGGTTCAGTTGGGTAGGATACCGGATCCCCGGGTTAATTAA	TATTCTCTTCAAACTTCAACGTTCAACCTGCTTTGCCGAGACGGCGATTAGAATTCGAGCTCGTTTAAAC	0		0		0
YBL009W	ALK2	2	207161	209191	+	AAATCATTTCACCAAACACACATACATGCGCTATTTGTATTGAGAAAATG	TTATAAGAACTTGCGGTGATTTGTTATCTTTGAAGGGAGAAATAATGCAG	ATCATTAAGAAGGATACAAAAGCTTGCACCTTATTACTACGATGTCTTTA	AAATCATTTCACCAAACACACATACATGCGCTATTTGTATTGAGAAAATGCGGATCCCCGGGTTAATTAA	TTATAAGAACTTGCGGTGATTTGTTATCTTTGAAGGGAGAAATAATGCAGCGGATCCCCGGGTTAATTAA	ATCATTAAGAAGGATACAAAAGCTTGCACCTTATTACTACGATGTCTTTAGAATTCGAGCTCGTTTAAAC	0		0		0
YBL008W-A	YBL008W-A	2	209376	209615	+	TTAGCTTGCCCCACAAACTGAAAGCACATTTTTAAAATGTTTCACAGATG	TTAAGGCTTACCAACGAAGCATAATAAAATTGCCAGTAACCAAAGGTCTC	ATTCTTCACGGTGAGCCAACCATGGAAACTTTACCACTTTCATGTTATCA	TTAGCTTGCCCCACAAACTGAAAGCACATTTTTAAAATGTTTCACAGATGCGGATCCCCGGGTTAATTAA	TTAAGGCTTACCAACGAAGCATAATAAAATTGCCAGTAACCAAAGGTCTCCGGATCCCCGGGTTAATTAA	ATTCTTCACGGTGAGCCAACCATGGAAACTTTACCACTTTCATGTTATCAGAATTCGAGCTCGTTTAAAC	0		0		0
YBL008W	HIR1	2	209620	212142	+	CCAACGAAGCATAATAAAATTGCCAGTAACCAAAGGTCTCTGATAACATG	AAAATGTGTATAAATGGACTAAGGATCTGGGTTGTTGGTCGTTATATAAA	GTAATTATGAGGGAAAAAACTTGTCCAAAGGAAGGGGTATAAGCTTATTA	CCAACGAAGCATAATAAAATTGCCAGTAACCAAAGGTCTCTGATAACATGCGGATCCCCGGGTTAATTAA	AAAATGTGTATAAATGGACTAAGGATCTGGGTTGTTGGTCGTTATATAAACGGATCCCCGGGTTAATTAA	GTAATTATGAGGGAAAAAACTTGTCCAAAGGAAGGGGTATAAGCTTATTAGAATTCGAGCTCGTTTAAAC	0		0		0
YBL007C	SLA1	2	212599	216333	-	AACATAGCCAAGGCGACAGAGTGTGTTATATACAAAAGAGCTAGAGTATG	CAAGGCAAGCCAACATATTCAATGCTACTGCATCAAATCCGTTTGGATTC	ATAGCTTGTTTTAGTTATTATCCTATAAAATCTTAAAATACATTAATCTA	AACATAGCCAAGGCGACAGAGTGTGTTATATACAAAAGAGCTAGAGTATGCGGATCCCCGGGTTAATTAA	CAAGGCAAGCCAACATATTCAATGCTACTGCATCAAATCCGTTTGGATTCCGGATCCCCGGGTTAATTAA	ATAGCTTGTTTTAGTTATTATCCTATAAAATCTTAAAATACATTAATCTAGAATTCGAGCTCGTTTAAAC	0		0		0
YBL006C	LDB7,RSC14	2	216554	217096	-	TTTACCTGAAAGCAGCAGAGCACGGTGTTAACAAGGAATAGCTGAGAATG	TTATAGGTTCCCATAGGCGGTCTCAACTTAGAGAACATGCCTGCGTAGAT	TAGTCACTTTCTACGAAGCAACATTCTACCTCTATCAATTACATGGTTTA	TTTACCTGAAAGCAGCAGAGCACGGTGTTAACAAGGAATAGCTGAGAATGCGGATCCCCGGGTTAATTAA	TTATAGGTTCCCATAGGCGGTCTCAACTTAGAGAACATGCCTGCGTAGATCGGATCCCCGGGTTAATTAA	TAGTCACTTTCTACGAAGCAACATTCTACCTCTATCAATTACATGGTTTAGAATTCGAGCTCGTTTAAAC	1	YBL006W-A	1	YBL006W-A	0
YBL006W-A	YBL006W-A	2	216678	216827	+	TTATCACTTTTCTTTTCCTTTTAGCCTCGCTATTCCTGGGGCTCTCTATG	GGTGCGAAAAGTCGACACTTGACAGGGCTTCCAACTGCTGGCGTGGCACA	GATGCGGCACAGGTGGAGTATGAAGTAGGCCATTCACTGCTGGGCAGTTA	TTATCACTTTTCTTTTCCTTTTAGCCTCGCTATTCCTGGGGCTCTCTATGCGGATCCCCGGGTTAATTAA	GGTGCGAAAAGTCGACACTTGACAGGGCTTCCAACTGCTGGCGTGGCACACGGATCCCCGGGTTAATTAA	GATGCGGCACAGGTGGAGTATGAAGTAGGCCATTCACTGCTGGGCAGTTAGAATTCGAGCTCGTTTAAAC	1	YBL006C	1	YBL006C	0
YBL005W	PDR3,TPE2,AMY2	2	217437	220367	+	CAACTGCATCAGCAGTTTTATTAATTTTTTCTTATTGCGTGACCGCAATG	CTGATTTATATCATACTCTGTGGAATGACAATACTTCATATCCCTTCTTA	TCCCATTTACTATGGTTATGCTCTGCTTCCCTATTTTCTTTGCGTTTTCA	CAACTGCATCAGCAGTTTTATTAATTTTTTCTTATTGCGTGACCGCAATGCGGATCCCCGGGTTAATTAA	CTGATTTATATCATACTCTGTGGAATGACAATACTTCATATCCCTTCTTACGGATCCCCGGGTTAATTAA	TCCCATTTACTATGGTTATGCTCTGCTTCCCTATTTTCTTTGCGTTTTCAGAATTCGAGCTCGTTTAAAC	0		0		0
YBL005W-A	YBL005W-A	2	221295	222617	+	AACTTCTAGTATATTCTGTATACCTAATATTATAGCCTTTATCAACAATG	CGATTCAATTGAAGAATACACACGACCTTCACCTTAGGCCAGGAACTTAC	GTCCAGGGAGTTCATCATCAGAATGATTAGTGTGATTTACCGTAGATTCA	AACTTCTAGTATATTCTGTATACCTAATATTATAGCCTTTATCAACAATGCGGATCCCCGGGTTAATTAA	CGATTCAATTGAAGAATACACACGACCTTCACCTTAGGCCAGGAACTTACCGGATCCCCGGGTTAATTAA	GTCCAGGGAGTTCATCATCAGAATGATTAGTGTGATTTACCGTAGATTCAGAATTCGAGCTCGTTTAAAC	1	YBL005W-B	1	YBL005W-B	0
YBL005W-B	YBL005W-B	2	221295	226563	+	AACTTCTAGTATATTCTGTATACCTAATATTATAGCCTTTATCAACAATG	AACCTCTTCCGATAAAAACATTCAAACTATTAACAAACAAATGGATTCAT	ACGATAGTGGATTTTTATTCCAACATACCACCCATAATGTAATAGATCTA	AACTTCTAGTATATTCTGTATACCTAATATTATAGCCTTTATCAACAATGCGGATCCCCGGGTTAATTAA	AACCTCTTCCGATAAAAACATTCAAACTATTAACAAACAAATGGATTCATCGGATCCCCGGGTTAATTAA	ACGATAGTGGATTTTTATTCCAACATACCACCCATAATGTAATAGATCTAGAATTCGAGCTCGTTTAAAC	1	YBL005W-A	1	YBL005W-A	0
YBL004W	UTP20	2	227684	235165	+	CGTATTGGTATATTTCTAGTATCAGTTACACATATTTCATTGAAAGTATG	AAAAGGATGAAAATGGGTATTATCAAAGACGTAACAAAAGAAAGAGAGCC	TTGGATTTTTTATTCATTAGTATACATGTTATAAAGATATATTACAGCTA	CGTATTGGTATATTTCTAGTATCAGTTACACATATTTCATTGAAAGTATGCGGATCCCCGGGTTAATTAA	AAAAGGATGAAAATGGGTATTATCAAAGACGTAACAAAAGAAAGAGAGCCCGGATCCCCGGGTTAATTAA	TTGGATTTTTTATTCATTAGTATACATGTTATAAAGATATATTACAGCTAGAATTCGAGCTCGTTTAAAC	0		0		0
YBL003C	HTA2,H2A2	2	235442	235840	-	TACATAAGAATTAGGAAAGTACAGAACAAGAGCAAATTTAATATATAATG	ACTTGTTGCCAAAGAAGTCTGCCAAGACTGCCAAAGCTTCTCAAGAACTG	AAATGACAAGAATGTTTGATTTGCTTTGTTTCTTTTCAACTCAGTTCTTA	TACATAAGAATTAGGAAAGTACAGAACAAGAGCAAATTTAATATATAATGCGGATCCCCGGGTTAATTAA	ACTTGTTGCCAAAGAAGTCTGCCAAGACTGCCAAAGCTTCTCAAGAACTGCGGATCCCCGGGTTAATTAA	AAATGACAAGAATGTTTGATTTGCTTTGTTTCTTTTCAACTCAGTTCTTAGAATTCGAGCTCGTTTAAAC	0		0		0
YBL002W	HTB2	2	236540	236935	+	TTCTGATTGCTCTATACTCAAACCAACAACAACTTACTCTACAACTAATG	TCTCCGAAGGTACTAGGGCTGTTACCAAATACTCCTCCTCTACTCAAGCC	ACTAATAAAAAGAAAACATGACTAAATCACAATACCTAGTGAGTGACTTA	TTCTGATTGCTCTATACTCAAACCAACAACAACTTACTCTACAACTAATGCGGATCCCCGGGTTAATTAA	TCTCCGAAGGTACTAGGGCTGTTACCAAATACTCCTCCTCTACTCAAGCCCGGATCCCCGGGTTAATTAA	ACTAATAAAAAGAAAACATGACTAAATCACAATACCTAGTGAGTGACTTAGAATTCGAGCTCGTTTAAAC	0		0		0
YBL001C	ECM15	2	237201	237515	-	CCGTCGTGATCATTAACTATAAAGCACATAAACTACAAGTTTAGAAAATG	ACCAAACTGCTCAAGATAAGATCGATGTTGTTTTAAAAAAAATTTCTCAA	AAACTCTCCTTAAAGATATACCCTATTTAGGTTCACTACACGAGCATTCA	CCGTCGTGATCATTAACTATAAAGCACATAAACTACAAGTTTAGAAAATGCGGATCCCCGGGTTAATTAA	ACCAAACTGCTCAAGATAAGATCGATGTTGTTTTAAAAAAAATTTCTCAACGGATCCCCGGGTTAATTAA	AAACTCTCCTTAAAGATATACCCTATTTAGGTTCACTACACGAGCATTCAGAATTCGAGCTCGTTTAAAC	0		0		0
YBR001C	NTH2	2	238989	241330	-	TCGGATCAGACATTTGGTATATAAGGAGACCTGCATATACTCAAATAATG	TGCCATTTTTCAATAGTTTGAAACCCTCTGAGAAAAAATTGTATTACCTA	AGAAAGAAGAATATAACATATATCTTATTTACATATGTTCGTCAATATTA	TCGGATCAGACATTTGGTATATAAGGAGACCTGCATATACTCAAATAATGCGGATCCCCGGGTTAATTAA	TGCCATTTTTCAATAGTTTGAAACCCTCTGAGAAAAAATTGTATTACCTACGGATCCCCGGGTTAATTAA	AGAAAGAAGAATATAACATATATCTTATTTACATATGTTCGTCAATATTAGAATTCGAGCTCGTTTAAAC	0		0		0
YBR002C	RER2	2	241755	242615	-	ATAGAACTTAAGCAGTAAAAATAGGGTAAACACAGGTAAAAGACGGTATG	ACGAGGAAACCAATGGGGACCCCATCGATTTGAAAGAAAAAAAGTTGAAT	TCTATAAATATCTATGCCATGTGGTAGGAAAAAAATGCAGACCTTTCTTA	ATAGAACTTAAGCAGTAAAAATAGGGTAAACACAGGTAAAAGACGGTATGCGGATCCCCGGGTTAATTAA	ACGAGGAAACCAATGGGGACCCCATCGATTTGAAAGAAAAAAAGTTGAATCGGATCCCCGGGTTAATTAA	TCTATAAATATCTATGCCATGTGGTAGGAAAAAAATGCAGACCTTTCTTAGAATTCGAGCTCGTTTAAAC	0		0		0
YBR003W	COQ1	2	242856	244277	+	CAACACAAGAAGTGTGCCATTCAGTCCGAATTGAGTACAGTGGGACGATG	CTCGTTCTGCCCTAGAGTTTTTAACTAATAGTATACTAACAAGAAGAAAG	TCTTCATTTTCTCTTTATTCTTCACCCTTTATTTGAAATTTCAAGGTTTA	CAACACAAGAAGTGTGCCATTCAGTCCGAATTGAGTACAGTGGGACGATGCGGATCCCCGGGTTAATTAA	CTCGTTCTGCCCTAGAGTTTTTAACTAATAGTATACTAACAAGAAGAAAGCGGATCCCCGGGTTAATTAA	TCTTCATTTTCTCTTTATTCTTCACCCTTTATTTGAAATTTCAAGGTTTAGAATTCGAGCTCGTTTAAAC	0		0		0
YBR004C	GPI18,FMP44	2	244413	245714	-	AAAAGAGAGGCTTCGAGAGAGGAGGCGGAATAAGACTAAATTAAAATATG	TCTGGATACCTTTACAGACTATCCTATTTGCAGCTTTTTTACCACCAGCC	GTTTTTATATGTTTTTAGTAAAAGAAGAAATATACAAGCATTAAGGATCA	AAAAGAGAGGCTTCGAGAGAGGAGGCGGAATAAGACTAAATTAAAATATGCGGATCCCCGGGTTAATTAA	TCTGGATACCTTTACAGACTATCCTATTTGCAGCTTTTTTACCACCAGCCCGGATCCCCGGGTTAATTAA	GTTTTTATATGTTTTTAGTAAAAGAAGAAATATACAAGCATTAAGGATCAGAATTCGAGCTCGTTTAAAC	0		0		0
YBR005W	RCR1	2	245953	246594	+	GATCATTCCAATAAATAGGAAAGTATAACTCGAATTAAGAATAAGGAATG	CAACGCAGGAAATTAACCCACCGGAGAGGGCAAAGGTAAATGCAAGGTCA	ATATTGTAACTCAACTGTAAGAGGACAGCCGGAAAAAAAGATTCAGTTCA	GATCATTCCAATAAATAGGAAAGTATAACTCGAATTAAGAATAAGGAATGCGGATCCCCGGGTTAATTAA	CAACGCAGGAAATTAACCCACCGGAGAGGGCAAAGGTAAATGCAAGGTCACGGATCCCCGGGTTAATTAA	ATATTGTAACTCAACTGTAAGAGGACAGCCGGAAAAAAAGATTCAGTTCAGAATTCGAGCTCGTTTAAAC	0		0		0
YBR006W	UGA2,UGA5	2	247057	248550	+	GAAAACCAGCTACATTAAAAGCAAATTTTACAAACTACTATTTCAACATG	ATTACACTGTTTTGAAGACCATCACAATTGGGAATTTGCCAAACAGCATT	CAAAGAATCATATTCAATTCTAAGTATCGTCCACGATTACTATTGCTTTA	GAAAACCAGCTACATTAAAAGCAAATTTTACAAACTACTATTTCAACATGCGGATCCCCGGGTTAATTAA	ATTACACTGTTTTGAAGACCATCACAATTGGGAATTTGCCAAACAGCATTCGGATCCCCGGGTTAATTAA	CAAAGAATCATATTCAATTCTAAGTATCGTCCACGATTACTATTGCTTTAGAATTCGAGCTCGTTTAAAC	0		0		0
YBR007C	DSF2	2	248853	251063	-	CAGAAAATCTAGAAAAACAAACGGACTTTTACGTCACACGAAAAGTAATG	TAGGTTCAGATTGGATTTATAAGGAAAAGTACATGAAACAAGGTCCGAAA	TTTTAAGCCTTTCTGTAAGCTTTTATGTATACAACGTTTCTTTATCTTTA	CAGAAAATCTAGAAAAACAAACGGACTTTTACGTCACACGAAAAGTAATGCGGATCCCCGGGTTAATTAA	TAGGTTCAGATTGGATTTATAAGGAAAAGTACATGAAACAAGGTCCGAAACGGATCCCCGGGTTAATTAA	TTTTAAGCCTTTCTGTAAGCTTTTATGTATACAACGTTTCTTTATCTTTAGAATTCGAGCTCGTTTAAAC	0		0		0
YBR008C	FLR1	2	252610	254256	-	TGGTGAAGCTATTATAAAAGAGTATCCGTTGAACGACAATCTCCACTATG	TTTATAAGTATGGGCCGTCATTACGTGCAAGATCTTCGTACACAGAGGAG	AATTGTGTTATTATAATTCAAATTTTCATGGTAAGAACATCGGCTTTCTA	TGGTGAAGCTATTATAAAAGAGTATCCGTTGAACGACAATCTCCACTATGCGGATCCCCGGGTTAATTAA	TTTATAAGTATGGGCCGTCATTACGTGCAAGATCTTCGTACACAGAGGAGCGGATCCCCGGGTTAATTAA	AATTGTGTTATTATAATTCAAATTTTCATGGTAAGAACATCGGCTTTCTAGAATTCGAGCTCGTTTAAAC	0		0		0
YBR009C	HHF1	2	255420	255731	-	ACTAAAGCAACAAACAAAAACAAGCAACAAATATAATATAGTATAATATG	TTGTTTATGCTTTGAAGAGACAAGGTAGAACCTTATACGGTTTCGGTGGT	ATCCCAAATATTTGCTTGTTGTTACCGTTTTCTTAGAATTAGCTAAATTA	ACTAAAGCAACAAACAAAAACAAGCAACAAATATAATATAGTATAATATGCGGATCCCCGGGTTAATTAA	TTGTTTATGCTTTGAAGAGACAAGGTAGAACCTTATACGGTTTCGGTGGTCGGATCCCCGGGTTAATTAA	ATCCCAAATATTTGCTTGTTGTTACCGTTTTCTTAGAATTAGCTAAATTAGAATTCGAGCTCGTTTAAAC	0		0		0
YBR010W	HHT1,SIN2,BUR5	2	256379	256788	+	TCTAGTTAATAAGAAAAACATCTAACATAAATATATAAACGCAAACAATG	TCCAAAAGAAGGATATCAAGTTGGCTAGAAGATTAAGAGGTGAAAGATCA	ATTGTGTTTTTGTTCGTTTTTTACTAAAACTGATGACAATCAACAAACTA	TCTAGTTAATAAGAAAAACATCTAACATAAATATATAAACGCAAACAATGCGGATCCCCGGGTTAATTAA	TCCAAAAGAAGGATATCAAGTTGGCTAGAAGATTAAGAGGTGAAAGATCACGGATCCCCGGGTTAATTAA	ATTGTGTTTTTGTTCGTTTTTTACTAAAACTGATGACAATCAACAAACTAGAATTCGAGCTCGTTTAAAC	0		0		0
YBR011C	IPP1,PPA1	2	257159	258022	-	TGTCCCTTAGGTCTATAGAACAGGATATCCCGCCGCGCAATTTACTAATG	CTCCAATTGACAAGTCTATTGACAAGTGGTTCTTCATCTCCGGTTCTGTT	TTGAAGCCGCATACGTGGTAGGTGTCTCATTTTCAATTCAAAATATTTTA	TGTCCCTTAGGTCTATAGAACAGGATATCCCGCCGCGCAATTTACTAATGCGGATCCCCGGGTTAATTAA	CTCCAATTGACAAGTCTATTGACAAGTGGTTCTTCATCTCCGGTTCTGTTCGGATCCCCGGGTTAATTAA	TTGAAGCCGCATACGTGGTAGGTGTCTCATTTTCAATTCAAAATATTTTAGAATTCGAGCTCGTTTAAAC	0		0		0
YBR012C	YBR012C	2	259230	259649	-	TTAGTTGATAGACGATAGTGGATTTTTATTCCAACAAATACTTTNNNNNN	TATCGGCAGTAGGTGTAGAACATCGATATCATAAAAGTGTTTCTCGTCTA	ACATGTCCAATACACTTTTTCGAACTATAACCGCCAACAAATTTATCTTA	TTAGTTGATAGACGATAGTGGATTTTTATTCCAACAAATACTTTNNNATGCGGATCCCCGGGTTAATTAA	TATCGGCAGTAGGTGTAGAACATCGATATCATAAAAGTGTTTCTCGTCTACGGATCCCCGGGTTAATTAA	ACATGTCCAATACACTTTTTCGAACTATAACCGCCAACAAATTTATCTTAGAATTCGAGCTCGTTTAAAC	0		0		0
YBR012W-A	YBR012W-A	2	259952	261274	+	AACTTCTAGTATATTCTGTATACCTAATATTATAGCCTTTATCAACAATG	NNNNNNNNNNNNNNNNNNNNNNNNNNNNNNNNNNNNNNNNNNNNNNNNNN	NNNNNNNNNNNNNNNNNNNNNNNNNNNNNNNNNNNNNNNNNNNNNNNNNN	AACTTCTAGTATATTCTGTATACCTAATATTATAGCCTTTATCAACAATGCGGATCCCCGGGTTAATTAA	NNNNNNNNNNNNNNNNNNNNNNNNNNNNNNNNNNNNNNNNNNNNNNNNNNCGGATCCCCGGGTTAATTAA	NNNNNNNNNNNNNNNNNNNNNNNNNNNNNNNNNNNNNNNNNNNNNNNNNNGAATTCGAGCTCGTTTAAAC	1	YBR012W-B	1	YBR012W-B	0
YBR012W-B	YBR012W-B	2	259952	265223	+	AACTTCTAGTATATTCTGTATACCTAATATTATAGCCTTTATCAACAATG	NNNNNNNNNNNNNNNNNNNNNNNNNNNNNNNNNNNNNNNNNNNNNNNNNN	NNNNNNNNNNNNNNNNNNNNNNNNNNNNNNNNNNNNNNNNNNNNNNNNNN	AACTTCTAGTATATTCTGTATACCTAATATTATAGCCTTTATCAACAATGCGGATCCCCGGGTTAATTAA	NNNNNNNNNNNNNNNNNNNNNNNNNNNNNNNNNNNNNNNNNNNNNNNNNNCGGATCCCCGGGTTAATTAA	NNNNNNNNNNNNNNNNNNNNNNNNNNNNNNNNNNNNNNNNNNNNNNNNNNGAATTCGAGCTCGTTTAAAC	1	YBR012W-A	1	YBR012W-A	0
YBR013C	YBR013C	2	265575	265967	-	GTACAAGGATCCGTATTAATTGCGTTTTTAGGCCACTTAACCTCATAATG	NNNNNNNNNNNNNNNNNNNNNNNNNNNNNNNNNNNNNNNNNNNNNNNNNN	NNNNNNNNNNNNNNNNNNNNNNNNNNNNNNNNNNNNNNNNNNNNNNNNNN	GTACAAGGATCCGTATTAATTGCGTTTTTAGGCCACTTAACCTCATAATGCGGATCCCCGGGTTAATTAA	NNNNNNNNNNNNNNNNNNNNNNNNNNNNNNNNNNNNNNNNNNNNNNNNNNCGGATCCCCGGGTTAATTAA	NNNNNNNNNNNNNNNNNNNNNNNNNNNNNNNNNNNNNNNNNNNNNNNNNNGAATTCGAGCTCGTTTAAAC	0		0		0
YBR014C	GRX6	2	266811	267422	-	AAGCAAAATTTTCAAATTAAACGCAAAACAACTGAAGAAAATTAAAGATG	GGAGCGATGGGGCGTTTACTGTAAAAGCTAATTCGCAATCTGAGAGTGCC	GCTACTGTGGGAGAAGAAGAAGAATAACTCTCAGTTTATAATCTGATCTA	AAGCAAAATTTTCAAATTAAACGCAAAACAACTGAAGAAAATTAAAGATGCGGATCCCCGGGTTAATTAA	GGAGCGATGGGGCGTTTACTGTAAAAGCTAATTCGCAATCTGAGAGTGCCCGGATCCCCGGGTTAATTAA	GCTACTGTGGGAGAAGAAGAAGAATAACTCTCAGTTTATAATCTGATCTAGAATTCGAGCTCGTTTAAAC	0		0		0
YBR015C	MNN2,LDB8,CRV4,TTP1	2	267797	269590	-	TTCGAGACAAATCAGTGTAGGTAGGTCAGTAAAATTATATTTTCAGTATG	ATAGATTAGCATTTTTAGAATCTACTCATGATAAGGCGATTGCCGGTAAA	AAAACGCCAACGGAAGTTGTCCAAACTATAGTCCGACCCGTTGCATATTA	TTCGAGACAAATCAGTGTAGGTAGGTCAGTAAAATTATATTTTCAGTATGCGGATCCCCGGGTTAATTAA	ATAGATTAGCATTTTTAGAATCTACTCATGATAAGGCGATTGCCGGTAAACGGATCCCCGGGTTAATTAA	AAAACGCCAACGGAAGTTGTCCAAACTATAGTCCGACCCGTTGCATATTAGAATTCGAGCTCGTTTAAAC	0		0		0
YBR016W	YBR016W	2	270334	270728	+	TGAAGAGACTCACTAGTAAGCTTAAGATAGTCCTACACACAACCAACATG	CTGCATGTCTGGCTGCATTATGTATATGCTGCACCATGGATATGCTATTC	ATTATTCTTTTTTTTTTTTTCATTCTTGAATACTTTTGCGGGTTCTCTTA	TGAAGAGACTCACTAGTAAGCTTAAGATAGTCCTACACACAACCAACATGCGGATCCCCGGGTTAATTAA	CTGCATGTCTGGCTGCATTATGTATATGCTGCACCATGGATATGCTATTCCGGATCCCCGGGTTAATTAA	ATTATTCTTTTTTTTTTTTTCATTCTTGAATACTTTTGCGGGTTCTCTTAGAATTCGAGCTCGTTTAAAC	0		0		0
YBR017C	KAP104	2	271041	273797	-	GCAGTCTTTGGTTTTCAGAATTGTTAGCAGTAGTTAAGTGAATAAAGATG	CAATAAATTTCACGCCCGATGAAATCTCCTTCTTACAACAGTTCACCAGC	ATAATGTACCAAACTATACAAACACGTAGGATACAGTAAAAAAAATTTTA	GCAGTCTTTGGTTTTCAGAATTGTTAGCAGTAGTTAAGTGAATAAAGATGCGGATCCCCGGGTTAATTAA	CAATAAATTTCACGCCCGATGAAATCTCCTTCTTACAACAGTTCACCAGCCGGATCCCCGGGTTAATTAA	ATAATGTACCAAACTATACAAACACGTAGGATACAGTAAAAAAAATTTTAGAATTCGAGCTCGTTTAAAC	0		0		0
YBR018C	GAL7	2	274521	275621	-	CAGAGCATCAACATGATAAAAAAAAACAGTTGAATATTCCCTCAAAAATG	CTGAAAAACTAAGAAATTTAGATGGTCAGATTCATTATCTACAAAGACTG	GCAGTTAATAGAAAAAATATGATATGAATGAATATTCCACTTTCTTTTTA	CAGAGCATCAACATGATAAAAAAAAACAGTTGAATATTCCCTCAAAAATGCGGATCCCCGGGTTAATTAA	CTGAAAAACTAAGAAATTTAGATGGTCAGATTCATTATCTACAAAGACTGCGGATCCCCGGGTTAATTAA	GCAGTTAATAGAAAAAATATGATATGAATGAATATTCCACTTTCTTTTTAGAATTCGAGCTCGTTTAAAC	0		0		0
YBR019C	GAL10	2	276347	278446	-	TGCGTCCATCCAAAAAAAAAGTAAGAATTTTTGAAAATTCAATATAAATG	CCTTGAAAAACGGTGAAACTTACGGGTCCAAGATTGTCTACAGATTTTCC	AAAAGATATAGAGTGCATATTTTCAAGAAGGATAGTAAGCTGGCAAATCA	TGCGTCCATCCAAAAAAAAAGTAAGAATTTTTGAAAATTCAATATAAATGCGGATCCCCGGGTTAATTAA	CCTTGAAAAACGGTGAAACTTACGGGTCCAAGATTGTCTACAGATTTTCCCGGATCCCCGGGTTAATTAA	AAAAGATATAGAGTGCATATTTTCAAGAAGGATAGTAAGCTGGCAAATCAGAATTCGAGCTCGTTTAAAC	0		0		0
YBR020W	GAL1	2	279115	280701	+	ATTGTTAATATACCTCTATACTTTAACGTCAAGGAGAAAAAACTATAATG	ATGCTATCATCGTCTCTAAACCAGCATTGGGCAGCTGTCTATATGAATTA	AAAAAAATGAGAAGTTGTTCTGAACAAAGTAAAAAAAAGAAGTATACTTA	ATTGTTAATATACCTCTATACTTTAACGTCAAGGAGAAAAAACTATAATGCGGATCCCCGGGTTAATTAA	ATGCTATCATCGTCTCTAAACCAGCATTGGGCAGCTGTCTATATGAATTACGGATCCCCGGGTTAATTAA	AAAAAAATGAGAAGTTGTTCTGAACAAAGTAAAAAAAAGAAGTATACTTAGAATTCGAGCTCGTTTAAAC	0		0		0
YBR021W	FUR4	2	281537	283438	+	TTTCGGTTCGAAGACATTCCTACGCATAATAAGAATAGGAGGGAATAATG	TAGATGACAATATTAGTGTCTACGAACACGAACACGAAAAGACTTTCATT	GAAAAATATTTCAGATTAATGCAGAAAGTGATGTAGATATGGAGAGCTTA	TTTCGGTTCGAAGACATTCCTACGCATAATAAGAATAGGAGGGAATAATGCGGATCCCCGGGTTAATTAA	TAGATGACAATATTAGTGTCTACGAACACGAACACGAAAAGACTTTCATTCGGATCCCCGGGTTAATTAA	GAAAAATATTTCAGATTAATGCAGAAAGTGATGTAGATATGGAGAGCTTAGAATTCGAGCTCGTTTAAAC	0		0		0
YBR022W	POA1	2	283832	284365	+	GTTTATTAGTATCTTCTCCAAGATAAATATAGCATCAAGTTACAGGTATG	GCGTGTTAGAAGAATTTAGTGGCGACATGAGTTTTACAGTATATCAGCTG	TAAATATTTCTCTATCTTTAAAGGCACATATTACGTGGCTAAGGCAATTA	GTTTATTAGTATCTTCTCCAAGATAAATATAGCATCAAGTTACAGGTATGCGGATCCCCGGGTTAATTAA	GCGTGTTAGAAGAATTTAGTGGCGACATGAGTTTTACAGTATATCAGCTGCGGATCCCCGGGTTAATTAA	TAAATATTTCTCTATCTTTAAAGGCACATATTACGTGGCTAAGGCAATTAGAATTCGAGCTCGTTTAAAC	0		0		0
YBR023C	CHS3,KTI2,DIT101,CSD2,CAL1	2	284522	288019	-	TTTTCTTCAAAGGTCCTGTTTAGACTATCCGCAGGAAAGAAATTAGAATG	AAAGGGAAGATATTCTCAATCGGAAGGAGGAAAGTGACTCCTTCGTTGCA	CCATATATCAACTTGTAAGTATCACAGTAAAAATATTTTCATACTGTCTA	TTTTCTTCAAAGGTCCTGTTTAGACTATCCGCAGGAAAGAAATTAGAATGCGGATCCCCGGGTTAATTAA	AAAGGGAAGATATTCTCAATCGGAAGGAGGAAAGTGACTCCTTCGTTGCACGGATCCCCGGGTTAATTAA	CCATATATCAACTTGTAAGTATCACAGTAAAAATATTTTCATACTGTCTAGAATTCGAGCTCGTTTAAAC	0		0		0
YBR024W	SCO2	2	289539	290444	+	TTTTATAATATCACCATAGAAAGGGGAATTTGGGAAGCGAGAGTAAAATG	AGGAAGAACGGGAGCGTAGGTCAAAAAAATGGTACTCTTTTATCTTCAAT	CCCATAAGTTCGGTATCCTAGCTGTGTCTTTTTCTTTTTTTTTTTGCTCA	TTTTATAATATCACCATAGAAAGGGGAATTTGGGAAGCGAGAGTAAAATGCGGATCCCCGGGTTAATTAA	AGGAAGAACGGGAGCGTAGGTCAAAAAAATGGTACTCTTTTATCTTCAATCGGATCCCCGGGTTAATTAA	CCCATAAGTTCGGTATCCTAGCTGTGTCTTTTTCTTTTTTTTTTTGCTCAGAATTCGAGCTCGTTTAAAC	0		0		0
YBR025C	OLA1	2	290775	291959	-	TACTTCTAGTATCCGTAAAAACAATCAAATAAATAGCACTGTAAAACATG	TCGTTGAAGACGGTGATATCATTTACTTCAGAGCTGGTGCTGGTAAGAAT	GTAGGGAACTAAACCAAATAAAGAAAAGTCAACTTTAGTGCACGAAATCA	TACTTCTAGTATCCGTAAAAACAATCAAATAAATAGCACTGTAAAACATGCGGATCCCCGGGTTAATTAA	TCGTTGAAGACGGTGATATCATTTACTTCAGAGCTGGTGCTGGTAAGAATCGGATCCCCGGGTTAATTAA	GTAGGGAACTAAACCAAATAAAGAAAAGTCAACTTTAGTGCACGAAATCAGAATTCGAGCTCGTTTAAAC	0		0		0
YBR026C	ETR1,MRF1',MRF1	2	292971	294113	-	TCATTTAAGAAGGTTCATAATCTGCCAATTACATTTGATATAACAAGATG	AAAAAGGTATAACTGGGAAGGGGAAGAAAAAAATGGTTGTTTTAGAATGG	GAATACTATCTTTGGTGGTTGTCTAACTCTGAGCAATGCTAAGGCCCTTA	TCATTTAAGAAGGTTCATAATCTGCCAATTACATTTGATATAACAAGATGCGGATCCCCGGGTTAATTAA	AAAAAGGTATAACTGGGAAGGGGAAGAAAAAAATGGTTGTTTTAGAATGGCGGATCCCCGGGTTAATTAA	GAATACTATCTTTGGTGGTTGTCTAACTCTGAGCAATGCTAAGGCCCTTAGAATTCGAGCTCGTTTAAAC	0		0		0
YBR027C	YBR027C	2	294118	294450	-	GAGAGAAGGCTCGGATCTGCACTGACTTACTTTTTTTTGTTTTTTTGATG	ACGTACATTGTCATTTAAGAAGGTTCATAATCTGCCAATTACATTTGATA	GATGAGCTGAGGACGACATGTAACGTTTGAATGTGGGAAGCATCTTGTTA	GAGAGAAGGCTCGGATCTGCACTGACTTACTTTTTTTTGTTTTTTTGATGCGGATCCCCGGGTTAATTAA	ACGTACATTGTCATTTAAGAAGGTTCATAATCTGCCAATTACATTTGATACGGATCCCCGGGTTAATTAA	GATGAGCTGAGGACGACATGTAACGTTTGAATGTGGGAAGCATCTTGTTAGAATTCGAGCTCGTTTAAAC	0		0		0
YBR028C	YBR028C	2	294519	296096	-	TTTTTCATCAACCAATCTAGCTGAGCATACTGTTGGCAGTAATTAGGATG	TCAAGGGATTTAGTTATAAAGCAAGTGGTAGCTATTTGGAGAAGTACTTT	GTCAGTGCAGATCCGAGCCTTCTCTCTTAATCTATCTAACTTTTAATTCA	TTTTTCATCAACCAATCTAGCTGAGCATACTGTTGGCAGTAATTAGGATGCGGATCCCCGGGTTAATTAA	TCAAGGGATTTAGTTATAAAGCAAGTGGTAGCTATTTGGAGAAGTACTTTCGGATCCCCGGGTTAATTAA	GTCAGTGCAGATCCGAGCCTTCTCTCTTAATCTATCTAACTTTTAATTCAGAATTCGAGCTCGTTTAAAC	0		0		0
YBR029C	CDS1,CDG1	2	296463	297836	-	AACAGCGAACCTGTCATACTTAACTGTTCCACTTCCATATACCTAAAATG	AGTTGGCTGACATCTTTAATGTGACCAAGAAATCATTGACCAATCACTCT	AAACTATTCATACACTCATATATACTTTTATATGGTCTTTTTTATATTCA	AACAGCGAACCTGTCATACTTAACTGTTCCACTTCCATATACCTAAAATGCGGATCCCCGGGTTAATTAA	AGTTGGCTGACATCTTTAATGTGACCAAGAAATCATTGACCAATCACTCTCGGATCCCCGGGTTAATTAA	AAACTATTCATACACTCATATATACTTTTATATGGTCTTTTTTATATTCAGAATTCGAGCTCGTTTAAAC	0		0		0
YBR030W	YBR030W	2	298386	300056	+	TGTTGCCATATATAATAGCAATTAAAAAATAAATTTGAAAGAGTGAGATG	TTGTACAATCGGAGCATAATATCTTAGATAGATGTCTCAAGAGACTATCC	TCGTGTGACGTGATATTAATATAGTAAAAGTGCATATTCAATATTATTTA	TGTTGCCATATATAATAGCAATTAAAAAATAAATTTGAAAGAGTGAGATGCGGATCCCCGGGTTAATTAA	TTGTACAATCGGAGCATAATATCTTAGATAGATGTCTCAAGAGACTATCCCGGATCCCCGGGTTAATTAA	TCGTGTGACGTGATATTAATATAGTAAAAGTGCATATTCAATATTATTTAGAATTCGAGCTCGTTTAAAC	0		0		0
YBR031W	RPL4A	2	300266	301354	+	CATCACTTTTCTTGTAATTTAGCAATATCCCAAGAACAATCATCGAAATG	AGACTGGTACCAAGCCAGCTGCTGTTTTCACCGAAACTTTGAAACACGAT	TGTATGTATATAAAAAATAAAAGAATATTTTTAATGTACTAATAAGTTTA	CATCACTTTTCTTGTAATTTAGCAATATCCCAAGAACAATCATCGAAATGCGGATCCCCGGGTTAATTAA	AGACTGGTACCAAGCCAGCTGCTGTTTTCACCGAAACTTTGAAACACGATCGGATCCCCGGGTTAATTAA	TGTATGTATATAAAAAATAAAAGAATATTTTTAATGTACTAATAAGTTTAGAATTCGAGCTCGTTTAAAC	0		0		0
YBR032W	YBR032W	2	301619	301921	+	AAGGTTACATACAAGATTTCTTCAGCGTTTGTTACTTCAGGAAGGCAATG	ACACTCCATGCCAGTATCTGTATGTGTTTTTGCAACAAGCACGACTGGAG	CAGAATCTTAATCTTATAGAGACAAATTTTGCTAGCGTGACTCTTTATTA	AAGGTTACATACAAGATTTCTTCAGCGTTTGTTACTTCAGGAAGGCAATGCGGATCCCCGGGTTAATTAA	ACACTCCATGCCAGTATCTGTATGTGTTTTTGCAACAAGCACGACTGGAGCGGATCCCCGGGTTAATTAA	CAGAATCTTAATCTTATAGAGACAAATTTTGCTAGCGTGACTCTTTATTAGAATTCGAGCTCGTTTAAAC	0		0		0
YBR033W	EDS1	2	302044	304803	+	GTAGCCCGCTACGTAGAAATACATAACAATAGAATAATCTTTCAAAAATG	GGAAATTGATGGATGATTCAGAATTGGGTTGTTGCTGTTGCTTCTTTAAC	ATCTATCCTTCATTAGGATGCTATTTTTCACCTTGTTATCATGAATATTA	GTAGCCCGCTACGTAGAAATACATAACAATAGAATAATCTTTCAAAAATGCGGATCCCCGGGTTAATTAA	GGAAATTGATGGATGATTCAGAATTGGGTTGTTGCTGTTGCTTCTTTAACCGGATCCCCGGGTTAATTAA	ATCTATCCTTCATTAGGATGCTATTTTTCACCTTGTTATCATGAATATTAGAATTCGAGCTCGTTTAAAC	0		0		0
YBR034C	HMT1,RMT1,ODP1,HCP1	2	305030	306076	-	CGTTTCCAAAAAAGAGTTAGAACCGACAAATTCATCCAAAGAAAATAATG	TCGACGGTAATTCAAGAAGCAGAAAAAACGAAGGTTCTTATTTAATGCAT	GTTTATTTGCTTTTCAAATTTTTTTCTTTCTCCAGCAAACAAAAGTCTTA	CGTTTCCAAAAAAGAGTTAGAACCGACAAATTCATCCAAAGAAAATAATGCGGATCCCCGGGTTAATTAA	TCGACGGTAATTCAAGAAGCAGAAAAAACGAAGGTTCTTATTTAATGCATCGGATCCCCGGGTTAATTAA	GTTTATTTGCTTTTCAAATTTTTTTCTTTCTCCAGCAAACAAAAGTCTTAGAATTCGAGCTCGTTTAAAC	0		0		0
YBR035C	PDX3	2	306369	307055	-	GATACTCTACCTAGACCAGTAGTACACTTCACGGATCTGCACTGAAAATG	ACAGAAGAAAAACAGAAAACGATCCATGGAAAGTCGTTAGACTAGCCCCA	ATATGGTGTTAAATAGATCCTACATTGAATTTTTCATTAACAGTCCCTCA	GATACTCTACCTAGACCAGTAGTACACTTCACGGATCTGCACTGAAAATGCGGATCCCCGGGTTAATTAA	ACAGAAGAAAAACAGAAAACGATCCATGGAAAGTCGTTAGACTAGCCCCACGGATCCCCGGGTTAATTAA	ATATGGTGTTAAATAGATCCTACATTGAATTTTTCATTAACAGTCCCTCAGAATTCGAGCTCGTTTAAAC	0		0		0
YBR036C	CSG2,CLS2	2	309181	310413	-	CTCTTGAGCTGGTGAGTTAGCACGATAACAAACAAAGATACAGCGTCATG	TAAGTTTGTTGGTCCTATCAGTAACACTCGGGGAAGGTAAATACCACCAT	ATATGCTTGTTACATCATCATCAGTCATATAAAGTATGTTGTCCGTACTA	CTCTTGAGCTGGTGAGTTAGCACGATAACAAACAAAGATACAGCGTCATGCGGATCCCCGGGTTAATTAA	TAAGTTTGTTGGTCCTATCAGTAACACTCGGGGAAGGTAAATACCACCATCGGATCCCCGGGTTAATTAA	ATATGCTTGTTACATCATCATCAGTCATATAAAGTATGTTGTCCGTACTAGAATTCGAGCTCGTTTAAAC	0		0		0
YBR037C	SCO1,PET161	2	310665	311552	-	GTTCGTATAAGGCAAGGGAAACAGAAAAAACAGCAAACGTAGAAAAGATG	CAGAGCAGCGCGCCAAGCAGAAGGAGGCATGGTACTCCTTCTTATTCAAA	AAGTATATATGTATATACAAGGAAGAAAGTAGCATATATTTACAATCTTA	GTTCGTATAAGGCAAGGGAAACAGAAAAAACAGCAAACGTAGAAAAGATGCGGATCCCCGGGTTAATTAA	CAGAGCAGCGCGCCAAGCAGAAGGAGGCATGGTACTCCTTCTTATTCAAACGGATCCCCGGGTTAATTAA	AAGTATATATGTATATACAAGGAAGAAAGTAGCATATATTTACAATCTTAGAATTCGAGCTCGTTTAAAC	0		0		0
YBR038W	CHS2	2	311998	314889	+	GAAGTTACATATAGACCCAAATAAAAACCAAAGAACCACATATAGAAATG	CATGGGAAGTCTCTAAATTAGACTTACCAAATGTTTTCCACAAAAAGGGC	TGAGAAAAAAGAGGGAATGACGAGAAATTAGCTGAAAAATACTGGCATTA	GAAGTTACATATAGACCCAAATAAAAACCAAAGAACCACATATAGAAATGCGGATCCCCGGGTTAATTAA	CATGGGAAGTCTCTAAATTAGACTTACCAAATGTTTTCCACAAAAAGGGCCGGATCCCCGGGTTAATTAA	TGAGAAAAAAGAGGGAATGACGAGAAATTAGCTGAAAAATACTGGCATTAGAATTCGAGCTCGTTTAAAC	0		0		0
YBR039W	ATP3	2	315675	316610	+	TGGAAACAATTGAAGACGAGCAGTAAACATTATTTTATTTAGTAGTCATG	TCATTACTAATGAACTGGTTGATATTATTACTGGTGCTTCCTCTTTGGGA	TACAAAAACAACGTCAAATAAAGAGGCAATGCAGGGTGATTTTTTTATCA	TGGAAACAATTGAAGACGAGCAGTAAACATTATTTTATTTAGTAGTCATGCGGATCCCCGGGTTAATTAA	TCATTACTAATGAACTGGTTGATATTATTACTGGTGCTTCCTCTTTGGGACGGATCCCCGGGTTAATTAA	TACAAAAACAACGTCAAATAAAGAGGCAATGCAGGGTGATTTTTTTATCAGAATTCGAGCTCGTTTAAAC	0		0		0
YBR040W	FIG1	2	317068	317964	+	AATTATAGTAAACAAACAAACAAACAAACAAAAAAAAAAAAAAAAAAATG	ATAGGTACAATAACTACTCTTCGGATTCATCTACATTGCATTCCAAAGTT	ATTCTGAAATATCCGCTCAAAACTTATATGTTTATTTGAGGATAAAACTA	AATTATAGTAAACAAACAAACAAACAAACAAAAAAAAAAAAAAAAAAATGCGGATCCCCGGGTTAATTAA	ATAGGTACAATAACTACTCTTCGGATTCATCTACATTGCATTCCAAAGTTCGGATCCCCGGGTTAATTAA	ATTCTGAAATATCCGCTCAAAACTTATATGTTTATTTGAGGATAAAACTAGAATTCGAGCTCGTTTAAAC	0		0		0
YBR041W	FAT1	2	318366	320375	+	TTCAAATTCTATATCGTTGAACTTTTAATAGGCTGCGAATACCGACTATG	TCTTGACCGCTGCTGATTGGGAAGCCATCGATGCACAAACAATTAAATTA	ACTCTCGTGCAAGGAAAAATACTTTATCCTAATTCAGGAACATCAAATCA	TTCAAATTCTATATCGTTGAACTTTTAATAGGCTGCGAATACCGACTATGCGGATCCCCGGGTTAATTAA	TCTTGACCGCTGCTGATTGGGAAGCCATCGATGCACAAACAATTAAATTACGGATCCCCGGGTTAATTAA	ACTCTCGTGCAAGGAAAAATACTTTATCCTAATTCAGGAACATCAAATCAGAATTCGAGCTCGTTTAAAC	0		0		0
YBR042C	CST26	2	320516	321709	-	ATATCAGGTCCACTGGTATTGAGATTGCTAGCGAGGTCAATAAGCTGATG	CAACTCTAACAATAATTTGGTTAGTTTATAAACTTTATTGTTTTATTTTT	TCTATCTATATATGTACCTAATAACATATGGAAAGGATTATTTAAATTCA	ATATCAGGTCCACTGGTATTGAGATTGCTAGCGAGGTCAATAAGCTGATGCGGATCCCCGGGTTAATTAA	CAACTCTAACAATAATTTGGTTAGTTTATAAACTTTATTGTTTTATTTTTCGGATCCCCGGGTTAATTAA	TCTATCTATATATGTACCTAATAACATATGGAAAGGATTATTTAAATTCAGAATTCGAGCTCGTTTAAAC	0		0		0
YBR043C	QDR3,AQR2	2	321976	324045	-	TAACTTGTTAACGTCTATGCTAGGACCGAAGTCAGAAAGCGATAAACATG	ATTACTGGAGAGAGAACTACGATTTACAAAAATTGTACGACAAAATTGAT	AGTCTACAATGAAAATATTTACGCTTCCGTCTTATTAACCGATATGATTA	TAACTTGTTAACGTCTATGCTAGGACCGAAGTCAGAAAGCGATAAACATGCGGATCCCCGGGTTAATTAA	ATTACTGGAGAGAGAACTACGATTTACAAAAATTGTACGACAAAATTGATCGGATCCCCGGGTTAATTAA	AGTCTACAATGAAAATATTTACGCTTCCGTCTTATTAACCGATATGATTAGAATTCGAGCTCGTTTAAAC	0		0		0
YBR044C	TCM62	2	324437	326158	-	TCTCCCACACTACTGTAAACATAAAACTCTCTTATGCTTTAACGAGTATG	ATACAATTATCACATGTGTATACAAAAGCCTGAACGGCACAAAGCCTAGA	TCTATTTACAATGACTCATTCTGACTATTTAAAAGTATGTAAGGGCTTTA	TCTCCCACACTACTGTAAACATAAAACTCTCTTATGCTTTAACGAGTATGCGGATCCCCGGGTTAATTAA	ATACAATTATCACATGTGTATACAAAAGCCTGAACGGCACAAAGCCTAGACGGATCCCCGGGTTAATTAA	TCTATTTACAATGACTCATTCTGACTATTTAAAAGTATGTAAGGGCTTTAGAATTCGAGCTCGTTTAAAC	0		0		0
YBR045C	GIP1	2	328469	330190	-	CAGTTCGCAAATTTTTTGGTGAAGAGCTATTCAATTATTAGCTAATTATG	TTCAATATACAGAGTATAAAAGGCAGAGAAATGAAGCAGAAATTATAGAC	ATCCAAAGGATATTCTTCAGAATAGTACTTGCTTAGTTGCTCTCCTCTCA	CAGTTCGCAAATTTTTTGGTGAAGAGCTATTCAATTATTAGCTAATTATGCGGATCCCCGGGTTAATTAA	TTCAATATACAGAGTATAAAAGGCAGAGAAATGAAGCAGAAATTATAGACCGGATCCCCGGGTTAATTAA	ATCCAAAGGATATTCTTCAGAATAGTACTTGCTTAGTTGCTCTCCTCTCAGAATTCGAGCTCGTTTAAAC	0		0		0
YBR046C	ZTA1	2	330605	331609	-	GCTACTAGTAAGCATTAAGAGACGAGATCGCTAACAACAAGACAAAAATG	ACATAGAAAGTAGAAAAACTGTTGGTAAGCTAGTTCTTGAAATACCACAA	AAGGCAAGAAAGCTGTCCAAATTATTACGATAAATCAATATATGATTCTA	GCTACTAGTAAGCATTAAGAGACGAGATCGCTAACAACAAGACAAAAATGCGGATCCCCGGGTTAATTAA	ACATAGAAAGTAGAAAAACTGTTGGTAAGCTAGTTCTTGAAATACCACAACGGATCCCCGGGTTAATTAA	AAGGCAAGAAAGCTGTCCAAATTATTACGATAAATCAATATATGATTCTAGAATTCGAGCTCGTTTAAAC	0		0		0
YBR047W	FMP23	2	331931	332458	+	GTAAATCTTTGTTCTGTGAACATAACTGAAAAAAAATCAGTTCATCAATG	TTGATGTCATGCTACAAGCCAAAGAAGTATTTGACAAAATGCAGAAAGAA	TAAAAAACTAACTGAATGAGTATAATTCAAATTTTTTATAGCTTTCTTCA	GTAAATCTTTGTTCTGTGAACATAACTGAAAAAAAATCAGTTCATCAATGCGGATCCCCGGGTTAATTAA	TTGATGTCATGCTACAAGCCAAAGAAGTATTTGACAAAATGCAGAAAGAACGGATCCCCGGGTTAATTAA	TAAAAAACTAACTGAATGAGTATAATTCAAATTTTTTATAGCTTTCTTCAGAATTCGAGCTCGTTTAAAC	0		0		0
YBR048W	RPS11B	2	332929	333910	+	AGCATTTGCTGAAGACTTAGAGGAAACGTATCAAGCCAGGGAAAAAGATG	TCAAGGTCTCTGCTGCTGCCGGTAAGGCCAACAAGCAATTTGCTAAATTT	GTTTTATCCTCCACTTATTATTATATCATCTTGTTAATTTTATTTCTTTA	AGCATTTGCTGAAGACTTAGAGGAAACGTATCAAGCCAGGGAAAAAGATGCGGATCCCCGGGTTAATTAA	TCAAGGTCTCTGCTGCTGCCGGTAAGGCCAACAAGCAATTTGCTAAATTTCGGATCCCCGGGTTAATTAA	GTTTTATCCTCCACTTATTATTATATCATCTTGTTAATTTTATTTCTTTAGAATTCGAGCTCGTTTAAAC	0		0		0
YBR049C	REB1,GRF2	2	334484	336916	-	GAACTCACGTGTTGCTGCTGAATTAGAATATTTATAGCTCAATCAATATG	AAGAGCTAGTTGATTATTTTAGCTCCAATATTTCAATGAAAACAGAAAAT	TCAAACATTATTGAGTTTTTCGCTTTCACCAATTATATTTTCCGGAATTA	GAACTCACGTGTTGCTGCTGAATTAGAATATTTATAGCTCAATCAATATGCGGATCCCCGGGTTAATTAA	AAGAGCTAGTTGATTATTTTAGCTCCAATATTTCAATGAAAACAGAAAATCGGATCCCCGGGTTAATTAA	TCAAACATTATTGAGTTTTTCGCTTTCACCAATTATATTTTCCGGAATTAGAATTCGAGCTCGTTTAAAC	0		0		0
YBR050C	REG2	2	337281	338297	-	TATATTGGAATAAGAAAAAAAAAATAGGAACAAGAAAGTGTGTGAGAATG	AAAATGACATTGACGCTTACATAGACACCAGTATACCCAACCTGCTCCTA	GAAGAAAATGAGACACAATTTCAATGTATTGAAAGTTTACGTAAAATTTA	TATATTGGAATAAGAAAAAAAAAATAGGAACAAGAAAGTGTGTGAGAATGCGGATCCCCGGGTTAATTAA	AAAATGACATTGACGCTTACATAGACACCAGTATACCCAACCTGCTCCTACGGATCCCCGGGTTAATTAA	GAAGAAAATGAGACACAATTTCAATGTATTGAAAGTTTACGTAAAATTTAGAATTCGAGCTCGTTTAAAC	1	YBR051W	1	YBR051W	0
YBR051W	YBR051W	2	338086	338436	+	TTCTTTGCTCGTGAAAGTCGAAATTTTTCTTCTTTACTGCTGGCAACATG	AGTTTCGAGACAACGCTAAATTTGACGGACATGCGAAGACATGCCATATA	AAAATAGTTATTGCTTCTTGAGTTGCAGCTTCTTCCTGGACGTACTGTTA	TTCTTTGCTCGTGAAAGTCGAAATTTTTCTTCTTTACTGCTGGCAACATGCGGATCCCCGGGTTAATTAA	AGTTTCGAGACAACGCTAAATTTGACGGACATGCGAAGACATGCCATATACGGATCCCCGGGTTAATTAA	AAAATAGTTATTGCTTCTTGAGTTGCAGCTTCTTCCTGGACGTACTGTTAGAATTCGAGCTCGTTTAAAC	1	YBR050C	1	YBR050C	0
YBR052C	RFS1	2	338818	339450	-	CCAGCATACTACTCACTATTATAAGCACATACTACGCCACATAGATAATG	GAGTTCACCAACTTCAAGGGAAGGCCTTTTACGACCGTATCAAAGATTTG	ATGTTACAGTTATACCATATCGTACTTATGTAAAGATATATACGGTTTTA	CCAGCATACTACTCACTATTATAAGCACATACTACGCCACATAGATAATGCGGATCCCCGGGTTAATTAA	GAGTTCACCAACTTCAAGGGAAGGCCTTTTACGACCGTATCAAAGATTTGCGGATCCCCGGGTTAATTAA	ATGTTACAGTTATACCATATCGTACTTATGTAAAGATATATACGGTTTTAGAATTCGAGCTCGTTTAAAC	0		0		0
YBR053C	YBR053C	2	339773	340849	-	CTTAGATTAAGTTTATATGCATTGAGCAACTAGACACTTTTCGTAAAATG	TGCTAGACGGAAATGTTCCTCTGGAATCTACAAAGCGACAACCTCTCCAC	TGCGCTGGATACGTATGCTGCATATATATAAACATATGTATATACACCTA	CTTAGATTAAGTTTATATGCATTGAGCAACTAGACACTTTTCGTAAAATGCGGATCCCCGGGTTAATTAA	TGCTAGACGGAAATGTTCCTCTGGAATCTACAAAGCGACAACCTCTCCACCGGATCCCCGGGTTAATTAA	TGCGCTGGATACGTATGCTGCATATATATAAACATATGTATATACACCTAGAATTCGAGCTCGTTTAAAC	0		0		0
YBR054W	YRO2	2	343199	344233	+	TTTCCTGATAACTTAAAGTGACACTATTTTTTAAAAAAAGCATCAAAATG	AGGCCAAGAAAGCCCAAGAAGAGGAGGAGGATGTAGCCACCGACTCTGAG	AGGAAAAAGAAGGAAAAAAACATTGCTACATCAGCAGATCAAAGCATTTA	TTTCCTGATAACTTAAAGTGACACTATTTTTTAAAAAAAGCATCAAAATGCGGATCCCCGGGTTAATTAA	AGGCCAAGAAAGCCCAAGAAGAGGAGGAGGATGTAGCCACCGACTCTGAGCGGATCCCCGGGTTAATTAA	AGGAAAAAGAAGGAAAAAAACATTGCTACATCAGCAGATCAAAGCATTTAGAATTCGAGCTCGTTTAAAC	0		0		0
YBR055C	PRP6,TSM7269,RNA6	2	344700	347399	-	GGGTGAGTTGACATAAAGAGTTTAACAGCAAGAAAACGTCACATTTTATG	TGCAATACTGCACACCTAGAGAGATTTTATTGCGCTTGATGAATGACAAA	AAATATACGCGCAGGCTAAGTAGAAAACAACGCAAGATAGAATTACTTTA	GGGTGAGTTGACATAAAGAGTTTAACAGCAAGAAAACGTCACATTTTATGCGGATCCCCGGGTTAATTAA	TGCAATACTGCACACCTAGAGAGATTTTATTGCGCTTGATGAATGACAAACGGATCCCCGGGTTAATTAA	AAATATACGCGCAGGCTAAGTAGAAAACAACGCAAGATAGAATTACTTTAGAATTCGAGCTCGTTTAAAC	0		0		0
YBR056W	YBR056W	2	347977	349482	+	CTCTCTATCCATCTATAAAATTTATTAAAACTTTTGAACTGCACAGAATG	GGGAATGGGATCAAGGCTACCAACGTGGGTTAGATGAGTTTAATAAGTAT	AAAGAATAGAAACGCCTATAGTTAGTATATATGTGTTTGTATATTTCTTA	CTCTCTATCCATCTATAAAATTTATTAAAACTTTTGAACTGCACAGAATGCGGATCCCCGGGTTAATTAA	GGGAATGGGATCAAGGCTACCAACGTGGGTTAGATGAGTTTAATAAGTATCGGATCCCCGGGTTAATTAA	AAAGAATAGAAACGCCTATAGTTAGTATATATGTGTTTGTATATTTCTTAGAATTCGAGCTCGTTTAAAC	0		0		0
YBR056W-A	YBR056W-A	2	351353	351553	+	CTTGTACTTTGAGAAATATCATCAAAAAAAAAAAGTGCGACATCACAATG	TATGTTGTCTGTGTCTAATTGATCTATGTTGTAGCTGCGCTGGCGGCATG	TTCATGATGATACAAGGCAAACCACAGCTTACAAGGCAAACCACAGCTTA	CTTGTACTTTGAGAAATATCATCAAAAAAAAAAAGTGCGACATCACAATGCGGATCCCCGGGTTAATTAA	TATGTTGTCTGTGTCTAATTGATCTATGTTGTAGCTGCGCTGGCGGCATGCGGATCCCCGGGTTAATTAA	TTCATGATGATACAAGGCAAACCACAGCTTACAAGGCAAACCACAGCTTAGAATTCGAGCTCGTTTAAAC	1	YBR056C-B	1	YBR056C-B	0
YBR056C-B	YBR056C-B	2	351391	351549	-	TGATGATACAAGGCAAACCACAGCTTACAAGGCAAACCACAGCTTACATG	TTCTTGGTGGCGGCGGCCCTTGTTGTATGTATATAGGTTGCGGTTGTGGT	GACATCACAATGAGACATCAATACTATCAACCACAACCGATGTATTATCA	TGATGATACAAGGCAAACCACAGCTTACAAGGCAAACCACAGCTTACATGCGGATCCCCGGGTTAATTAA	TTCTTGGTGGCGGCGGCCCTTGTTGTATGTATATAGGTTGCGGTTGTGGTCGGATCCCCGGGTTAATTAA	GACATCACAATGAGACATCAATACTATCAACCACAACCGATGTATTATCAGAATTCGAGCTCGTTTAAAC	1	YBR056W-A	1	YBR056W-A	0
YBR057C	MUM2,SPOT8	2	352291	353391	-	CCTCATTCTTTTTGCATACACGGCTCGTTTGGAATACTGTTGTAAAAATG	TGGAAGCCCATTTGGCTTCAAAGGAGTCTTCAAAGGAGGACGTTGCTAAT	CGTTTTTTAGAATTAGCCATATGTTCTCGATAATGAGTAAACCTCTTTCA	CCTCATTCTTTTTGCATACACGGCTCGTTTGGAATACTGTTGTAAAAATGCGGATCCCCGGGTTAATTAA	TGGAAGCCCATTTGGCTTCAAAGGAGTCTTCAAAGGAGGACGTTGCTAATCGGATCCCCGGGTTAATTAA	CGTTTTTTAGAATTAGCCATATGTTCTCGATAATGAGTAAACCTCTTTCAGAATTCGAGCTCGTTTAAAC	0		0		0
YBR058C	UBP14,GID6	2	353770	356114	-	GTAAATTCATCCAAAAAGAGAGCCCGAAGTCTTTCTCACATTCAGAAATG	GCATTGAAGATATGAAAAAAAATGGTTATATTTATTTCTATACAAGATGC	TATATATATATGTGTGTGTGTGTGTGTGTGTGTGTGTAAACGTTCTTTTA	GTAAATTCATCCAAAAAGAGAGCCCGAAGTCTTTCTCACATTCAGAAATGCGGATCCCCGGGTTAATTAA	GCATTGAAGATATGAAAAAAAATGGTTATATTTATTTCTATACAAGATGCCGGATCCCCGGGTTAATTAA	TATATATATATGTGTGTGTGTGTGTGTGTGTGTGTGTAAACGTTCTTTTAGAATTCGAGCTCGTTTAAAC	0		0		0
YBR058C-A	TSC3	2	356421	356663	-	TGTAGAAACCGGAAGAACAAAGGTGGAACATATCATAAGGGGAAGAAATG	TCACAATTTTCAGTTTGAGTTTCTTCGGTATACTAAAGTATTGCTTCCTT	CCTCCAGCTTATACTATTATTAACCGAATAAGGATATAAATAATCATTCA	TGTAGAAACCGGAAGAACAAAGGTGGAACATATCATAAGGGGAAGAAATGCGGATCCCCGGGTTAATTAA	TCACAATTTTCAGTTTGAGTTTCTTCGGTATACTAAAGTATTGCTTCCTTCGGATCCCCGGGTTAATTAA	CCTCCAGCTTATACTATTATTAACCGAATAAGGATATAAATAATCATTCAGAATTCGAGCTCGTTTAAAC	0		0		0
YBR059C	AKL1	2	356958	360284	-	GTTTTCGTCCCTGTCGCCTGTTATTTTCTTTCTAATTAGCACTGATCATG	GCAGTAACGGGAAAAGGAGATCTTTTTTCTCAGTCTTTAGAAGCGAGAAA	ATGTAACAATGTATGTATATGATTTTATATGTGCTCTATTTATCGAATCA	GTTTTCGTCCCTGTCGCCTGTTATTTTCTTTCTAATTAGCACTGATCATGCGGATCCCCGGGTTAATTAA	GCAGTAACGGGAAAAGGAGATCTTTTTTCTCAGTCTTTAGAAGCGAGAAACGGATCCCCGGGTTAATTAA	ATGTAACAATGTATGTATATGATTTTATATGTGCTCTATTTATCGAATCAGAATTCGAGCTCGTTTAAAC	0		0		0
YBR060C	ORC2,SIR5,RRR1	2	360749	362611	-	GCTATATCTTTAAAACAAGTTTTTGTAGTACTGCGAATTGCCATAACATG	ACACGTATGCGGAACTTGAAAAACTTCTGAAAACCGTTTTAAATACTCTA	AGCTAGCAAGCCTAGTACTATTACAATTGTTCGTGATATGTATACATTTA	GCTATATCTTTAAAACAAGTTTTTGTAGTACTGCGAATTGCCATAACATGCGGATCCCCGGGTTAATTAA	ACACGTATGCGGAACTTGAAAAACTTCTGAAAACCGTTTTAAATACTCTACGGATCCCCGGGTTAATTAA	AGCTAGCAAGCCTAGTACTATTACAATTGTTCGTGATATGTATACATTTAGAATTCGAGCTCGTTTAAAC	0		0		0
YBR061C	TRM7	2	364884	365816	-	ACAACAGTAGATGAGTACAAGGCAAGCTTAAAAAGAAAGTATTCAAGATG	ACAAGAAAGCTTTGGAATTAAAAAGGAGCGGGAAACTCACTAGATCAGTT	ATGTAGTGACTTATTTAATTGTTTGATTAGAGGTAGTAATATTGCAATCA	ACAACAGTAGATGAGTACAAGGCAAGCTTAAAAAGAAAGTATTCAAGATGCGGATCCCCGGGTTAATTAA	ACAAGAAAGCTTTGGAATTAAAAAGGAGCGGGAAACTCACTAGATCAGTTCGGATCCCCGGGTTAATTAA	ATGTAGTGACTTATTTAATTGTTTGATTAGAGGTAGTAATATTGCAATCAGAATTCGAGCTCGTTTAAAC	0		0		0
YBR062C	YBR062C	2	366073	366697	-	GAAATAATAGAAAGATATATTCATCAAACATAATCACAATCAAAAAAATG	AGATTGATACAACTGAAGCAGAACTGGAAGAAGATTGGGGTATGTACGGT	CTATTCTACTTAGGTTTGGTGTCTTTATATAATATAAAAGAAAGATATTA	GAAATAATAGAAAGATATATTCATCAAACATAATCACAATCAAAAAAATGCGGATCCCCGGGTTAATTAA	AGATTGATACAACTGAAGCAGAACTGGAAGAAGATTGGGGTATGTACGGTCGGATCCCCGGGTTAATTAA	CTATTCTACTTAGGTTTGGTGTCTTTATATAATATAAAAGAAAGATATTAGAATTCGAGCTCGTTTAAAC	0		0		0
YBR063C	YBR063C	2	367067	368281	-	GATTTCTGATAGCTCTTTTTTTTCCAATATCGATAAAAAACTAAAATATG	TTAATGATAAAGGCGCAACTTCGATTCTACTGTGGTACTCTAACTATTCA	GTTGGCATATCTTACATTTTCCGGATTATGTATCAAATAAACTTTATCTA	GATTTCTGATAGCTCTTTTTTTTCCAATATCGATAAAAAACTAAAATATGCGGATCCCCGGGTTAATTAA	TTAATGATAAAGGCGCAACTTCGATTCTACTGTGGTACTCTAACTATTCACGGATCCCCGGGTTAATTAA	GTTGGCATATCTTACATTTTCCGGATTATGTATCAAATAAACTTTATCTAGAATTCGAGCTCGTTTAAAC	1	YBR064W	1	YBR064W	0
YBR064W	YBR064W	2	367860	368288	+	TAACGTCACTTCGATTATTGAGGCAGTCTTCATTAAAGTTTATTACAATG	AGCCATATTCATATGGAAAAGTGCTTTTTAAACCTAGTTCCTCCATATTT	ATTGACTGATTTCTGATAGCTCTTTTTTTTCCAATATCGATAAAAAACTA	TAACGTCACTTCGATTATTGAGGCAGTCTTCATTAAAGTTTATTACAATGCGGATCCCCGGGTTAATTAA	AGCCATATTCATATGGAAAAGTGCTTTTTAAACCTAGTTCCTCCATATTTCGGATCCCCGGGTTAATTAA	ATTGACTGATTTCTGATAGCTCTTTTTTTTCCAATATCGATAAAAAACTAGAATTCGAGCTCGTTTAAAC	1	YBR063C	1	YBR063C	0
YBR065C	ECM2,SLT11	2	368681	369775	-	TGAATAGAAGGTAGCTAACGGAAAAGAGTTATTGCACCCTTAATATAATG	ATAAGGACAGATCAAAGAAATCGAAACCTCGCGCTAACAAGTTAACAATA	GATCAAACAGTTCGTTTCTTCAACCCATGATTTTTCTTACGTTTCATCTA	TGAATAGAAGGTAGCTAACGGAAAAGAGTTATTGCACCCTTAATATAATGCGGATCCCCGGGTTAATTAA	ATAAGGACAGATCAAAGAAATCGAAACCTCGCGCTAACAAGTTAACAATACGGATCCCCGGGTTAATTAA	GATCAAACAGTTCGTTTCTTCAACCCATGATTTTTCTTACGTTTCATCTAGAATTCGAGCTCGTTTAAAC	0		0		0
YBR066C	NRG2	2	370134	370796	-	CTACTGTTCGAAGAACAAAAAATATAAAGCTTCTACAAAATTTCCAGATG	CTCATGCAAACAAGAAGAAAAGAAACTGGAAGAGGAGGGAGGCTAGCAGT	TGTACGTTATTTGAATATTTAAATGTTTTTGGCTGAGCTCACTCACATCA	CTACTGTTCGAAGAACAAAAAATATAAAGCTTCTACAAAATTTCCAGATGCGGATCCCCGGGTTAATTAA	CTCATGCAAACAAGAAGAAAAGAAACTGGAAGAGGAGGGAGGCTAGCAGTCGGATCCCCGGGTTAATTAA	TGTACGTTATTTGAATATTTAAATGTTTTTGGCTGAGCTCACTCACATCAGAATTCGAGCTCGTTTAAAC	0		0		0
YBR067C	TIP1	2	372199	372831	-	ACAATAATTGCTATTGCATAACTATACCCTCTGCTAAATAAAATAAAATG	GCGCTGCCTCTTTCGGTGCTGTTGTTGCAGGTGCAGCTGCTTTATTGTTA	TAATAATGGAGGTAATTTTTCAAATATTTGTTGTAAAAGGTTCCCTTTTA	ACAATAATTGCTATTGCATAACTATACCCTCTGCTAAATAAAATAAAATGCGGATCCCCGGGTTAATTAA	GCGCTGCCTCTTTCGGTGCTGTTGTTGCAGGTGCAGCTGCTTTATTGTTACGGATCCCCGGGTTAATTAA	TAATAATGGAGGTAATTTTTCAAATATTTGTTGTAAAAGGTTCCCTTTTAGAATTCGAGCTCGTTTAAAC	0		0		0
YBR068C	BAP2	2	373957	375786	-	ATACTATCAATTTATTTAGCTTCAATAAAACTCAAGTGATTTTAGAAATG	AAAAACTAAGGAATATGTCTTTGATGAGAAAAGCTTATCATTTCTGGTGT	AACCGGCTCTAATGGGAAGTGTCCAGACCTGAGTGGTGTAGTTAAGTTTA	ATACTATCAATTTATTTAGCTTCAATAAAACTCAAGTGATTTTAGAAATGCGGATCCCCGGGTTAATTAA	AAAAACTAAGGAATATGTCTTTGATGAGAAAAGCTTATCATTTCTGGTGTCGGATCCCCGGGTTAATTAA	AACCGGCTCTAATGGGAAGTGTCCAGACCTGAGTGGTGTAGTTAAGTTTAGAATTCGAGCTCGTTTAAAC	0		0		0
YBR069C	TAT1,VAP1	2	376670	378529	-	TACCACCGTAGCTACCTAATATAGTTTCTCGATAAAAAGGCGTAAAAATG	ACAGCTCGCGTTCAAGAAAGTTTTTTAAGAGGATGACCAATTTCTGGTGC	GCAACGAAAGCCCGATGAAGCCAAGCGGAAAATGAATGGAATTGCTGTTA	TACCACCGTAGCTACCTAATATAGTTTCTCGATAAAAAGGCGTAAAAATGCGGATCCCCGGGTTAATTAA	ACAGCTCGCGTTCAAGAAAGTTTTTTAAGAGGATGACCAATTTCTGGTGCCGGATCCCCGGGTTAATTAA	GCAACGAAAGCCCGATGAAGCCAAGCGGAAAATGAATGGAATTGCTGTTAGAATTCGAGCTCGTTTAAAC	0		0		0
YBR070C	ALG14	2	379317	380030	-	CGGTTTATTATTGTATCAGGAAAGTCGAAAGAAGTGACTTGAAGATCATG	AATTGAGGGACAATTATTTACCAAGATCCAAGTGGTTCGGCATCCTTGTT	ACTTCAAAAATAGTTGGAAGTTTTACTATCCTACATAAATGGTTTACTTA	CGGTTTATTATTGTATCAGGAAAGTCGAAAGAAGTGACTTGAAGATCATGCGGATCCCCGGGTTAATTAA	AATTGAGGGACAATTATTTACCAAGATCCAAGTGGTTCGGCATCCTTGTTCGGATCCCCGGGTTAATTAA	ACTTCAAAAATAGTTGGAAGTTTTACTATCCTACATAAATGGTTTACTTAGAATTCGAGCTCGTTTAAAC	0		0		0
YBR071W	YBR071W	2	380506	381141	+	CATACCAACTATATATTGTGACGGCACAAAAAGACAAAATACGTAAAATG	TGGACAACCTGGATATGGGTTCCAGTAGAAGGACATCGTTGGACTTTTTT	CGAATTGTCCAACATCAACAACAAAGTGTGTCCTATGGTAGGTTATATTA	CATACCAACTATATATTGTGACGGCACAAAAAGACAAAATACGTAAAATGCGGATCCCCGGGTTAATTAA	TGGACAACCTGGATATGGGTTCCAGTAGAAGGACATCGTTGGACTTTTTTCGGATCCCCGGGTTAATTAA	CGAATTGTCCAACATCAACAACAAAGTGTGTCCTATGGTAGGTTATATTAGAATTCGAGCTCGTTTAAAC	0		0		0
YBR072W	HSP26	2	382125	382769	+	TAAAACAGGTATCCAAAAAAGCAAACAAACAAACTAAACAAATTAACATG	AGAACCACGTCAAGAAGATTGAGGTTTCTTCTCAAGAATCGTGGGGTAAC	CAACAATGGTCCTCGCGAGAGGGACAACACTATAGAGCCAGGTCACTTTA	TAAAACAGGTATCCAAAAAAGCAAACAAACAAACTAAACAAATTAACATGCGGATCCCCGGGTTAATTAA	AGAACCACGTCAAGAAGATTGAGGTTTCTTCTCAAGAATCGTGGGGTAACCGGATCCCCGGGTTAATTAA	CAACAATGGTCCTCGCGAGAGGGACAACACTATAGAGCCAGGTCACTTTAGAATTCGAGCTCGTTTAAAC	0		0		0
YBR072C-A	YBR072C-A	2	382955	383116	-	TTTCTTTTTTTTTTTTAGCTCTTCGCGTTTTATTTTTTATTTTCTTGATG	TGAAGATTTTGGTAATTACAAGAACGAGGTTAGATTCCTTCGTTAAAACT	AGTTATAAAAACTTGCTTTGGCTTCGATATATGACCGTTATTTTTGACTA	TTTCTTTTTTTTTTTTAGCTCTTCGCGTTTTATTTTTTATTTTCTTGATGCGGATCCCCGGGTTAATTAA	TGAAGATTTTGGTAATTACAAGAACGAGGTTAGATTCCTTCGTTAAAACTCGGATCCCCGGGTTAATTAA	AGTTATAAAAACTTGCTTTGGCTTCGATATATGACCGTTATTTTTGACTAGAATTCGAGCTCGTTTAAAC	0		0		0
YBR073W	RDH54,TID1	2	383310	386084	+	AAACAGCTCGGGTATATCAAACGGTATTTGATTCCGGTACTACTCAAATG	GTATTACCTTTGCGTTTGTAAAGCCCGGCGAGATATGTCTCAGAGAACAA	TTAAATAATAGCTATTTTATTTAGTATATAAGTGTCCATATTTGGCGTCA	AAACAGCTCGGGTATATCAAACGGTATTTGATTCCGGTACTACTCAAATGCGGATCCCCGGGTTAATTAA	GTATTACCTTTGCGTTTGTAAAGCCCGGCGAGATATGTCTCAGAGAACAACGGATCCCCGGGTTAATTAA	TTAAATAATAGCTATTTTATTTAGTATATAAGTGTCCATATTTGGCGTCAGAATTCGAGCTCGTTTAAAC	0		0		0
YBR074W	YBR074W	2	386382	389312	+	TTATCTACAAGGAAATAAATTGATAGGTAAAGTTAAAGAATCACGGCATG	TTACCAACGAACAGAAAGGATTAGTTATTGTCAAGGATGCTATAATTTTA	TAGGCGAATTTGAGTTTATAAAAATTTACATTTAAAACTAATTAGAATTA	TTATCTACAAGGAAATAAATTGATAGGTAAAGTTAAAGAATCACGGCATGCGGATCCCCGGGTTAATTAA	TTACCAACGAACAGAAAGGATTAGTTATTGTCAAGGATGCTATAATTTTACGGATCCCCGGGTTAATTAA	TAGGCGAATTTGAGTTTATAAAAATTTACATTTAAAACTAATTAGAATTAGAATTCGAGCTCGTTTAAAC	0		0		0
YBR076W	ECM8	2	390468	391488	+	TGACTCTTCAACATCCACTCTTTCGAGGGTTTTAACGGACACCACGAATG	AATTTGCCGCTAGTAACGAACTAAACGATTACGAGACGGCTGATAAATAC	GGTAACCGTTATAAATTTAAAGCGTTTCTTCGCTAGGATGGTGAATATTA	TGACTCTTCAACATCCACTCTTTCGAGGGTTTTAACGGACACCACGAATGCGGATCCCCGGGTTAATTAA	AATTTGCCGCTAGTAACGAACTAAACGATTACGAGACGGCTGATAAATACCGGATCCCCGGGTTAATTAA	GGTAACCGTTATAAATTTAAAGCGTTTCTTCGCTAGGATGGTGAATATTAGAATTCGAGCTCGTTTAAAC	1	YBR076C-A	1	YBR076C-A	0
YBR076C-A	YBR076C-A	2	391445	391711	-	GATTACGCGGATTGCCGTGGTGCACTTTCGTGCACTCGCACATATATATG	TGGTGAATATTAGTATTTATCAGCCGTCTCGTAATCGTTTAGTTCGTTAC	GATATTAAAAATAAATGATCATATAACAAATCAAACAAAATTTGCCGCTA	GATTACGCGGATTGCCGTGGTGCACTTTCGTGCACTCGCACATATATATGCGGATCCCCGGGTTAATTAA	TGGTGAATATTAGTATTTATCAGCCGTCTCGTAATCGTTTAGTTCGTTACCGGATCCCCGGGTTAATTAA	GATATTAAAAATAAATGATCATATAACAAATCAAACAAAATTTGCCGCTAGAATTCGAGCTCGTTTAAAC	1	YBR076W	1	YBR076W	0
YBR077C	SLM4,GSE1,NIR1,EGO3	2	391899	392387	-	AAAAGGCAGTTATCAGCAGCAAACGGTATCCAAAATATTGAAGCAATATG	TTGAAAGAGCTATGAGAGAGTTGACTGATTTGTTTGGCTACAAGCTAGGT	CGGAGACGCATGAAAAGGTGTGGCCTCGATACATATTGTTAAACCCATCA	AAAAGGCAGTTATCAGCAGCAAACGGTATCCAAAATATTGAAGCAATATGCGGATCCCCGGGTTAATTAA	TTGAAAGAGCTATGAGAGAGTTGACTGATTTGTTTGGCTACAAGCTAGGTCGGATCCCCGGGTTAATTAA	CGGAGACGCATGAAAAGGTGTGGCCTCGATACATATTGTTAAACCCATCAGAATTCGAGCTCGTTTAAAC	0		0		0
YBR078W	ECM33	2	393216	394953	+	TTATTTGACTTTTAAAGATCTAGTTTTAATTTTACTATTATTCCGCAATG	TCCTTTTTTATTATGAGACGGTTGGTTCATCACTGAATTTTATATGTAGA	ATATAGTAACAATAAGAAATAAAAGAGATATTAACGACACTAAAATTTTA	TTATTTGACTTTTAAAGATCTAGTTTTAATTTTACTATTATTCCGCAATGCGGATCCCCGGGTTAATTAA	TCCTTTTTTATTATGAGACGGTTGGTTCATCACTGAATTTTATATGTAGACGGATCCCCGGGTTAATTAA	ATATAGTAACAATAAGAAATAAAAGAGATATTAACGACACTAAAATTTTAGAATTCGAGCTCGTTTAAAC	0		0		0
YBR079C	RPG1,TIF32	2	395476	398370	-	AGAGAGAGTTCCAAAATAAACCATACAAACGCCCAGGAAACATCAAGATG	TGACTATGGCTGAAAAGTTGAGAGCCAAGAGATTGGCCAAGGGGGGCAGG	ACGTATAAAAAACGGTATAAATTAAGTAGATCATTTTGCGTTGTCTGTTA	AGAGAGAGTTCCAAAATAAACCATACAAACGCCCAGGAAACATCAAGATGCGGATCCCCGGGTTAATTAA	TGACTATGGCTGAAAAGTTGAGAGCCAAGAGATTGGCCAAGGGGGGCAGGCGGATCCCCGGGTTAATTAA	ACGTATAAAAAACGGTATAAATTAAGTAGATCATTTTGCGTTGTCTGTTAGAATTCGAGCTCGTTTAAAC	0		0		0
YBR080C	SEC18,ANU4	2	398707	400983	-	AAGATAAGAGCAAATAGTACCGTATATTCAGCCTTTATAAATTGAGTATG	ACGATGAAGATCCCGTGAACGAGCTTGTTGAGTTGATGACCCAATCCGCA	GAAGGGATAAAGAATAAAAATACAAGGACATGAAAAATTTGAAATAATTA	AAGATAAGAGCAAATAGTACCGTATATTCAGCCTTTATAAATTGAGTATGCGGATCCCCGGGTTAATTAA	ACGATGAAGATCCCGTGAACGAGCTTGTTGAGTTGATGACCCAATCCGCACGGATCCCCGGGTTAATTAA	GAAGGGATAAAGAATAAAAATACAAGGACATGAAAAATTTGAAATAATTAGAATTCGAGCTCGTTTAAAC	0		0		0
YBR081C	SPT7,GIT2	2	401346	405344	-	TGGTTACTCTTTAAACTGTAACACTACAAAGAAATTAAGTCTGAATAATG	ATATGGGCAGCAATAGTTCATTTAGCTTGAGCCTTCCTCGCCTTAATCAA	AAATGTATTTAATTAAAGATAAAATATTCAACTATTTAGCGCGCTCATTA	TGGTTACTCTTTAAACTGTAACACTACAAAGAAATTAAGTCTGAATAATGCGGATCCCCGGGTTAATTAA	ATATGGGCAGCAATAGTTCATTTAGCTTGAGCCTTCCTCGCCTTAATCAACGGATCCCCGGGTTAATTAA	AAATGTATTTAATTAAAGATAAAATATTCAACTATTTAGCGCGCTCATTAGAATTCGAGCTCGTTTAAAC	0		0		0
YBR082C	UBC4	2	406722	407263	-	ATTTCACTGACTATAGAGTACATACATAAACAAGCATCCAAAAAAACATG	GACCCAAGTACGAAGCTACAGCCAGAGAATGGACAAAGAAATACGCTGTA	CCCATATAAATCTTGCTTCTCTTTTTCAGCTGAGTAAGGACTTCTGTTTA	ATTTCACTGACTATAGAGTACATACATAAACAAGCATCCAAAAAAACATGCGGATCCCCGGGTTAATTAA	GACCCAAGTACGAAGCTACAGCCAGAGAATGGACAAAGAAATACGCTGTACGGATCCCCGGGTTAATTAA	CCCATATAAATCTTGCTTCTCTTTTTCAGCTGAGTAAGGACTTCTGTTTAGAATTCGAGCTCGTTTAAAC	0		0		0
YBR083W	TEC1,ROC1	2	409263	410723	+	AAGAAGAATAATCCACCTATTTCAACAATTCTGATACCTGTTTAACCATG	CACATCAAAGGAACTTTACGCCATCCAACCAATCGCATGGGAACTTTTAT	ATACGTATGCGTATTTATGTACGAGATGTATGTATGTATGTAGACATTTA	AAGAAGAATAATCCACCTATTTCAACAATTCTGATACCTGTTTAACCATGCGGATCCCCGGGTTAATTAA	CACATCAAAGGAACTTTACGCCATCCAACCAATCGCATGGGAACTTTTATCGGATCCCCGGGTTAATTAA	ATACGTATGCGTATTTATGTACGAGATGTATGTATGTATGTAGACATTTAGAATTCGAGCTCGTTTAAAC	0		0		0
YBR084W	MIS1	2	411148	414075	+	GATTCTCTCAGTCTGTTCATTTGTCAGATATTTAAGGCTAAAAGGAAATG	GTTACATGGCAGTAGAAGTCGACGACGACGGTGAAATTGAAGGTCTATTT	ACGGACATCGAGGTCGAATTGATGCCATTAGGAGTCTGCCAAACTATTTA	GATTCTCTCAGTCTGTTCATTTGTCAGATATTTAAGGCTAAAAGGAAATGCGGATCCCCGGGTTAATTAA	GTTACATGGCAGTAGAAGTCGACGACGACGGTGAAATTGAAGGTCTATTTCGGATCCCCGGGTTAATTAA	ACGGACATCGAGGTCGAATTGATGCCATTAGGAGTCTGCCAAACTATTTAGAATTCGAGCTCGTTTAAAC	0		0		0
YBR084C-A	RPL19A	2	414280	415355	-	GATTTTACGCTTCACATAGAAAGTTGATTAAGAACTCCAAAGCAAAAATG	GAGCTCAAAGAGTTGCTGAAAAGAGAGATGCTTTATTGAAGGAAGACGCT	GTTTATTAACTGAGTATGTATATTAAGATAAATTAATTAAAGAAAATTTA	GATTTTACGCTTCACATAGAAAGTTGATTAAGAACTCCAAAGCAAAAATGCGGATCCCCGGGTTAATTAA	GAGCTCAAAGAGTTGCTGAAAAGAGAGATGCTTTATTGAAGGAAGACGCTCGGATCCCCGGGTTAATTAA	GTTTATTAACTGAGTATGTATATTAAGATAAATTAATTAAAGAAAATTTAGAATTCGAGCTCGTTTAAAC	0		0		0
YBR085W	AAC3,ANC3	2	416077	417000	+	AATTGAAGACGGTTTACCTGAAGTGATATACTGTGCCTTGAGAAACAATG	TTTCCATGTATGACCAGTTGCAAATGATATTGTTCGGTAAAAAATTCAAA	AAGGTGAAGAGAAGTCGAGAAAATGACTTTTTTCTTCATCCAACTGATCA	AATTGAAGACGGTTTACCTGAAGTGATATACTGTGCCTTGAGAAACAATGCGGATCCCCGGGTTAATTAA	TTTCCATGTATGACCAGTTGCAAATGATATTGTTCGGTAAAAAATTCAAACGGATCCCCGGGTTAATTAA	AAGGTGAAGAGAAGTCGAGAAAATGACTTTTTTCTTCATCCAACTGATCAGAATTCGAGCTCGTTTAAAC	0		0		0
YBR085C-A	YBR085C-A	2	419001	419258	-	ATAGGGGCTCAAGTTACCAACTACAATAAATTACATTATACTATAACATG	ATATCATTGGTGAGGCCAAAGATTATCTTTTGGATTTGGCCGGCCAGGCT	AAGTGTGCATGAAGTGACTCGTATCGAACAAATATTTAGCCACTCGTTCA	ATAGGGGCTCAAGTTACCAACTACAATAAATTACATTATACTATAACATGCGGATCCCCGGGTTAATTAA	ATATCATTGGTGAGGCCAAAGATTATCTTTTGGATTTGGCCGGCCAGGCTCGGATCCCCGGGTTAATTAA	AAGTGTGCATGAAGTGACTCGTATCGAACAAATATTTAGCCACTCGTTCAGAATTCGAGCTCGTTTAAAC	0		0		0
YBR086C	IST2	2	420295	423135	-	AATACATTTGAAAAAGATTAAAACAAGCACAAGCGGTTGAGCATACTATG	AAAAACCAAAACATAAAAAGGGGCTATTGCATAAGCTGAAAAAGAAGCTT	TGTCACCATATTATAAAAATAAAATTTGTTATCGTCCTAGCTTTTTTTTA	AATACATTTGAAAAAGATTAAAACAAGCACAAGCGGTTGAGCATACTATGCGGATCCCCGGGTTAATTAA	AAAAACCAAAACATAAAAAGGGGCTATTGCATAAGCTGAAAAAGAAGCTTCGGATCCCCGGGTTAATTAA	TGTCACCATATTATAAAAATAAAATTTGTTATCGTCCTAGCTTTTTTTTAGAATTCGAGCTCGTTTAAAC	0		0		0
YBR087W	RFC5	2	423859	424923	+	CATTTGTATGATGGTTCATGGAAATTATAGATTAGTACAGCACAAACATG	CAATATTCCATTTGGAAGGGTTCATAGCAAAAGTTATGTGCTGTCTAGAT	TATCAGCTTTTTGTGTGACTTATACAGTATTTATGACATATCTTACATTA	CATTTGTATGATGGTTCATGGAAATTATAGATTAGTACAGCACAAACATGCGGATCCCCGGGTTAATTAA	CAATATTCCATTTGGAAGGGTTCATAGCAAAAGTTATGTGCTGTCTAGATCGGATCCCCGGGTTAATTAA	TATCAGCTTTTTGTGTGACTTATACAGTATTTATGACATATCTTACATTAGAATTCGAGCTCGTTTAAAC	0		0		0
YBR088C	POL30	2	425084	425860	-	CAGCAACAAGCAGCAAGCACTAAGTACGCAGTCAAAAGAGAGAAAAAATG	AGAGTGGGTTCCTACAGTTTTTCTTGGCTCCTAAATTTAATGACGAAGAA	TTTTTTGTTTATTATTTTTAGTATACAACTATATAGATAATTTACATTTA	CAGCAACAAGCAGCAAGCACTAAGTACGCAGTCAAAAGAGAGAAAAAATGCGGATCCCCGGGTTAATTAA	AGAGTGGGTTCCTACAGTTTTTCTTGGCTCCTAAATTTAATGACGAAGAACGGATCCCCGGGTTAATTAA	TTTTTTGTTTATTATTTTTAGTATACAACTATATAGATAATTTACATTTAGAATTCGAGCTCGTTTAAAC	1	YBR089W	1	YBR089W	0
YBR089W	YBR089W	2	425277	425876	+	ATTTAGCTCCGAACGTCAAGTCGACAGGTTGATCCATTTCAAGTTTGATG	TGAAAAGGGATGCTTCTTCAAATTTTGCTTCTAACATTTTTTCTCTCTTT	CGTCCTTTTTCACTCACAGCAACAAGCAGCAAGCACTAAGTACGCAGTCA	ATTTAGCTCCGAACGTCAAGTCGACAGGTTGATCCATTTCAAGTTTGATGCGGATCCCCGGGTTAATTAA	TGAAAAGGGATGCTTCTTCAAATTTTGCTTCTAACATTTTTTCTCTCTTTCGGATCCCCGGGTTAATTAA	CGTCCTTTTTCACTCACAGCAACAAGCAGCAAGCACTAAGTACGCAGTCAGAATTCGAGCTCGTTTAAAC	1	YBR088C	1	YBR088C	0
YBR089C-A	NHP6B,YBR090C-A	2	426284	426583	-	GTACTAACTAATTAACTTAGAACATTAACATATATAAAACTAGCGCTATG	ACAAGAAGAGATACGAATCTGAAAAGGAATTGTACAATGCTACACGTGCT	TTTCAAAAGTACGTTGTATGGGAGGTAGAGAACATTGAGTTGTTAGATCA	GTACTAACTAATTAACTTAGAACATTAACATATATAAAACTAGCGCTATGCGGATCCCCGGGTTAATTAA	ACAAGAAGAGATACGAATCTGAAAAGGAATTGTACAATGCTACACGTGCTCGGATCCCCGGGTTAATTAA	TTTCAAAAGTACGTTGTATGGGAGGTAGAGAACATTGAGTTGTTAGATCAGAATTCGAGCTCGTTTAAAC	1	YBR090C	1	YBR090C	0
YBR090C	YBR090C	2	426427	427152	-	ATATATAGCATTATAAGCTGTGTAGACAATTTTAGAAGTACATTTATATG	GTTCTTTGCTAATGAAAACAGAGACATTGTCCGTTCCGAGAATCCTGACG	TAAGGCCTTCCACCTCTCACCCAATATTCTGCCTACTTGGCCAAAAGTTA	ATATATAGCATTATAAGCTGTGTAGACAATTTTAGAAGTACATTTATATGCGGATCCCCGGGTTAATTAA	GTTCTTTGCTAATGAAAACAGAGACATTGTCCGTTCCGAGAATCCTGACGCGGATCCCCGGGTTAATTAA	TAAGGCCTTCCACCTCTCACCCAATATTCTGCCTACTTGGCCAAAAGTTAGAATTCGAGCTCGTTTAAAC	1	YBR089C-A	1	YBR089C-A	0
YBR091C	MRS5,TIM12	2	427249	427578	-	ATAGATATCGGAGCTCCCGTATAATATTAAAGTGCACCAAGAAAAGGATG	GACATTATTCGCGATTTGTGGCCAAAGAAATAGCTGATGATTCCAAAAAA	AGGTTACTATTATATACAAACAGCACAGACAGTCCTCATATTTACAGCTA	ATAGATATCGGAGCTCCCGTATAATATTAAAGTGCACCAAGAAAAGGATGCGGATCCCCGGGTTAATTAA	GACATTATTCGCGATTTGTGGCCAAAGAAATAGCTGATGATTCCAAAAAACGGATCCCCGGGTTAATTAA	AGGTTACTATTATATACAAACAGCACAGACAGTCCTCATATTTACAGCTAGAATTCGAGCTCGTTTAAAC	0		0		0
YBR092C	PHO3	2	427792	429195	-	TCATAAAAAAAATACTACAGTAAAGAAAGGGCCATTCCAAATTACCTATG	TCTACTGGGACTGGAATACTACTCACTACAACGATACCCTATTAAAACAA	ATCGATGGGTATTTATTTATATTTGCAATATTATTTATTTATACAATTTA	TCATAAAAAAAATACTACAGTAAAGAAAGGGCCATTCCAAATTACCTATGCGGATCCCCGGGTTAATTAA	TCTACTGGGACTGGAATACTACTCACTACAACGATACCCTATTAAAACAACGGATCCCCGGGTTAATTAA	ATCGATGGGTATTTATTTATATTTGCAATATTATTTATTTATACAATTTAGAATTCGAGCTCGTTTAAAC	0		0		0
YBR093C	PHO5	2	429642	431045	-	GAGAATAAGAACAACAACAAATAGAGCAAGCAAATTCGAGATTACCAATG	TCTACTGGGACTGGAACACTACTCATTACAACGCCAGTCTATTGAGACAA	ATTTGGGTATTCGTATTTAGTTTCCAATATTATTTAGTTATACAAAACTA	GAGAATAAGAACAACAACAAATAGAGCAAGCAAATTCGAGATTACCAATGCGGATCCCCGGGTTAATTAA	TCTACTGGGACTGGAACACTACTCATTACAACGCCAGTCTATTGAGACAACGGATCCCCGGGTTAATTAA	ATTTGGGTATTCGTATTTAGTTTCCAATATTATTTAGTTATACAAAACTAGAATTCGAGCTCGTTTAAAC	0		0		0
YBR094W	PBY1	2	432130	434391	+	TGATCTCTGACATTAAAAATTCGGAAACAATAAATATTTCTTTTAAGATG	AAACAGACCCGAACTTCGTAAAAGTCATTGATTACACTTCAAACGGTTGG	AGTAATAATAACAGTATTTTAGGATGGGTTCTTTTTTTTTTTTTGTTTCA	TGATCTCTGACATTAAAAATTCGGAAACAATAAATATTTCTTTTAAGATGCGGATCCCCGGGTTAATTAA	AAACAGACCCGAACTTCGTAAAAGTCATTGATTACACTTCAAACGGTTGGCGGATCCCCGGGTTAATTAA	AGTAATAATAACAGTATTTTAGGATGGGTTCTTTTTTTTTTTTTGTTTCAGAATTCGAGCTCGTTTAAAC	0		0		0
YBR095C	RXT2,RAF60	2	434500	435792	-	AGAGGTTGAGAAACAAATATCTCAGCTGTTGCTTCTTGTTGATCGAGATG	AAGACGGTGTTGTAGACGATAATGAACCTGATGAAGAAGCTAATAGAGCC	AATACATATGCCTTGATTTTATTTCCGAAATTTTTTGTTTTGTCAATTTA	AGAGGTTGAGAAACAAATATCTCAGCTGTTGCTTCTTGTTGATCGAGATGCGGATCCCCGGGTTAATTAA	AAGACGGTGTTGTAGACGATAATGAACCTGATGAAGAAGCTAATAGAGCCCGGATCCCCGGGTTAATTAA	AATACATATGCCTTGATTTTATTTCCGAAATTTTTTGTTTTGTCAATTTAGAATTCGAGCTCGTTTAAAC	0		0		0
YBR096W	YBR096W	2	436115	436807	+	GTAACTAGTGCTTTCCAATATCTACAACAAAATAAAATAATAGAATAATG	ACGAGACAGTACCATTGGAAAACTTGAGCCAAGAGTACTGTTCAGAAATC	AAGATAGATTTATATATTTTATAATACCGGCTATATGTGTATAGAAGTTA	GTAACTAGTGCTTTCCAATATCTACAACAAAATAAAATAATAGAATAATGCGGATCCCCGGGTTAATTAA	ACGAGACAGTACCATTGGAAAACTTGAGCCAAGAGTACTGTTCAGAAATCCGGATCCCCGGGTTAATTAA	AAGATAGATTTATATATTTTATAATACCGGCTATATGTGTATAGAAGTTAGAATTCGAGCTCGTTTAAAC	0		0		0
YBR097W	VPS15,VPL19,VAC4,GRD8	2	437045	441409	+	GAAATACAAAAGCTGTAAGGTTATCAAAAAGGAAGGCATACAGTATAATG	CACCTTTGCTGGTTGCTTGTGATAACTCAGGGCTTATTGGAATCTTCCAA	AAATTTATACGCATTTAGAATAAAGAAGCTGAATAAAATAAAAAAAATTA	GAAATACAAAAGCTGTAAGGTTATCAAAAAGGAAGGCATACAGTATAATGCGGATCCCCGGGTTAATTAA	CACCTTTGCTGGTTGCTTGTGATAACTCAGGGCTTATTGGAATCTTCCAACGGATCCCCGGGTTAATTAA	AAATTTATACGCATTTAGAATAAAGAAGCTGAATAAAATAAAAAAAATTAGAATTCGAGCTCGTTTAAAC	0		0		0
YBR098W	MMS4,YBR100W,SLX2	2	441609	443684	+	TGGATTATGGTATAGAATAATAGTAGTCACATATTGCAGCTAGTTAAATG	AAAGATTGTACAAACTGTTTACTTGTACTGATCCAAATGATACTATTGAA	ACGACTGCCTTAAGGTATGTTCTTATATACAAAGTTTCGTTCGATCATCA	TGGATTATGGTATAGAATAATAGTAGTCACATATTGCAGCTAGTTAAATGCGGATCCCCGGGTTAATTAA	AAAGATTGTACAAACTGTTTACTTGTACTGATCCAAATGATACTATTGAACGGATCCCCGGGTTAATTAA	ACGACTGCCTTAAGGTATGTTCTTATATACAAAGTTTCGTTCGATCATCAGAATTCGAGCTCGTTTAAAC	1	YBR099C	1	YBR099C	0
YBR099C	YBR099C	2	443018	443401	-	ATTTTACATTCAAATGAGCATATTTCATATACCGAATTGCGGGATCCATG	ATAATTCTTTCTTTTGTGAAGTGTATTGTTCAAAAAATTCTTGCGCATCA	TACCCCTGTGATCCCAAAATAGTTGAAGAAAACGTTTTGATTCTATATTA	ATTTTACATTCAAATGAGCATATTTCATATACCGAATTGCGGGATCCATGCGGATCCCCGGGTTAATTAA	ATAATTCTTTCTTTTGTGAAGTGTATTGTTCAAAAAATTCTTGCGCATCACGGATCCCCGGGTTAATTAA	TACCCCTGTGATCCCAAAATAGTTGAAGAAAACGTTTTGATTCTATATTAGAATTCGAGCTCGTTTAAAC	1	YBR098W	1	YBR098W	0
YBR101C	FES1	2	443915	444787	-	ACCTTTCAACGAAAGAGTAAAATAGAAAAAAAAACACATACATAACTATG	TAAAGGACAGACTTAATGAAGACGATTATTTAGCCGTAAAGTATGTATTA	TAATATGAAATGGTGAATGTAATATCATTTTATTTCTACGGACGTAATCA	ACCTTTCAACGAAAGAGTAAAATAGAAAAAAAAACACATACATAACTATGCGGATCCCCGGGTTAATTAA	TAAAGGACAGACTTAATGAAGACGATTATTTAGCCGTAAAGTATGTATTACGGATCCCCGGGTTAATTAA	TAATATGAAATGGTGAATGTAATATCATTTTATTTCTACGGACGTAATCAGAATTCGAGCTCGTTTAAAC	0		0		0
YBR102C	EXO84,USA3	2	445156	447417	-	ATTAGACCAGGTAAGAGACTGAAAGTTGAAATATTTGTACTGTGAAAATG	TTGTCTACAAATTGGACGAGTTTATCAAAAAGAACAGTGATAAAATTCGC	CTACACATCATATATATTGAAGTGAGGTTTATTTTCTGTGATCTTGTTTA	ATTAGACCAGGTAAGAGACTGAAAGTTGAAATATTTGTACTGTGAAAATGCGGATCCCCGGGTTAATTAA	TTGTCTACAAATTGGACGAGTTTATCAAAAAGAACAGTGATAAAATTCGCCGGATCCCCGGGTTAATTAA	CTACACATCATATATATTGAAGTGAGGTTTATTTTCTGTGATCTTGTTTAGAATTCGAGCTCGTTTAAAC	0		0		0
YBR103W	SIF2,EMB1	2	447803	449410	+	AAATAACAGAAACAAAAAAAAGGTAGGGAAGGCCCATCACACGGAAAATG	ACAAGATTTCTGTAGCATACTCGCTTCAAGAAGGTTCAGTTGTAGCCATA	ACAATAAGAATGATAAAATTCATCTGTTTATGTACTGTACCTAGTTATTA	AAATAACAGAAACAAAAAAAAGGTAGGGAAGGCCCATCACACGGAAAATGCGGATCCCCGGGTTAATTAA	ACAAGATTTCTGTAGCATACTCGCTTCAAGAAGGTTCAGTTGTAGCCATACGGATCCCCGGGTTAATTAA	ACAATAAGAATGATAAAATTCATCTGTTTATGTACTGTACCTAGTTATTAGAATTCGAGCTCGTTTAAAC	0		0		0
YBR103C-A	YBR103C-A	2	449414	449557	-	ATGCTCATTGTCTTCTCTCATCGCGAGCGGCCGTTATCTTCAAAGTGATG	AAAGAAATAACAATAAGAATGATAAAATTCATCTGTTTATGTACTGTACC	CTGTAGCATACTCGCTTCAAGAAGGTTCAGTTGTAGCCATATAATAACTA	ATGCTCATTGTCTTCTCTCATCGCGAGCGGCCGTTATCTTCAAAGTGATGCGGATCCCCGGGTTAATTAA	AAAGAAATAACAATAAGAATGATAAAATTCATCTGTTTATGTACTGTACCCGGATCCCCGGGTTAATTAA	CTGTAGCATACTCGCTTCAAGAAGGTTCAGTTGTAGCCATATAATAACTAGAATTCGAGCTCGTTTAAAC	0		0		0
YBR104W	YMC2	2	449761	450750	+	AGAAAAAAGCGGCGCAATAATTTCGTGTATTACAATTACAGTTAGTCATG	GTGCGACATTCCTGACGTTTGAATTAGTCATGAGATTTCTGGGGGAAGAG	CATGTCTATGTCTATATCTATAAAACGATGTTTTCATATATACTCTCCTA	AGAAAAAAGCGGCGCAATAATTTCGTGTATTACAATTACAGTTAGTCATGCGGATCCCCGGGTTAATTAA	GTGCGACATTCCTGACGTTTGAATTAGTCATGAGATTTCTGGGGGAAGAGCGGATCCCCGGGTTAATTAA	CATGTCTATGTCTATATCTATAAAACGATGTTTTCATATATACTCTCCTAGAATTCGAGCTCGTTTAAAC	0		0		0
YBR105C	VID24,GID4	2	450975	452063	-	TTGTGGCGTCTTGTGCATGACACCAACACATATCGCAAGCTTGAGTCATG	CATCTTTGAAAAATAAAGTCGAGTCCAGTGATTGTTCTTTTGAGTTTGCT	TTAGTGAAGAGAAAAGGGTATGCAGGTAAAAACGAATATATCACACATCA	TTGTGGCGTCTTGTGCATGACACCAACACATATCGCAAGCTTGAGTCATGCGGATCCCCGGGTTAATTAA	CATCTTTGAAAAATAAAGTCGAGTCCAGTGATTGTTCTTTTGAGTTTGCTCGGATCCCCGGGTTAATTAA	TTAGTGAAGAGAAAAGGGTATGCAGGTAAAAACGAATATATCACACATCAGAATTCGAGCTCGTTTAAAC	0		0		0
YBR106W	PHO88	2	452752	453318	+	GAAACTATAACAGTATAACACAGCACAAGAGAACCGAGCAGCCCGCCATG	AATCTATCGAAGAAGCTGAAAGAGCCGGTAACGCTGGTGTTAAGGCTGAA	TTTTTACATAAAAACTAGGAAAAAAAAATACTTCGCTTTTGATCGAATCA	GAAACTATAACAGTATAACACAGCACAAGAGAACCGAGCAGCCCGCCATGCGGATCCCCGGGTTAATTAA	AATCTATCGAAGAAGCTGAAAGAGCCGGTAACGCTGGTGTTAAGGCTGAACGGATCCCCGGGTTAATTAA	TTTTTACATAAAAACTAGGAAAAAAAAATACTTCGCTTTTGATCGAATCAGAATTCGAGCTCGTTTAAAC	0		0		0
YBR107C	IML3,MCM19	2	453887	454624	-	GGTTGATTTGATTGTCTATAGGTATCAACGTACTTCCTTTGGATGGAATG	GGAACAGAGTTCTAGCAGTTGTACTCCAATCGATTCAGTTTACCAGCGAG	TAGAGCTGTGGTTTTTTATTGTATCTTGGTGAATATTCTTTATAGTGTTA	GGTTGATTTGATTGTCTATAGGTATCAACGTACTTCCTTTGGATGGAATGCGGATCCCCGGGTTAATTAA	GGAACAGAGTTCTAGCAGTTGTACTCCAATCGATTCAGTTTACCAGCGAGCGGATCCCCGGGTTAATTAA	TAGAGCTGTGGTTTTTTATTGTATCTTGGTGAATATTCTTTATAGTGTTAGAATTCGAGCTCGTTTAAAC	0		0		0
YBR108W	YBR108W	2	454916	457759	+	TATGTTCGAGAGAGGTCTTTCATAAAAAAATCAAGTTATCAACCAGCATG	ACAAACGAAATGTTGTTCCTCAAGAAGATGACAGACTGCATAAATTAAAA	TAACTAAATTTAGCCAGTATTAAGTTCAATGTTGCGTAGCTATTTCATTA	TATGTTCGAGAGAGGTCTTTCATAAAAAAATCAAGTTATCAACCAGCATGCGGATCCCCGGGTTAATTAA	ACAAACGAAATGTTGTTCCTCAAGAAGATGACAGACTGCATAAATTAAAACGGATCCCCGGGTTAATTAA	TAACTAAATTTAGCCAGTATTAAGTTCAATGTTGCGTAGCTATTTCATTAGAATTCGAGCTCGTTTAAAC	0		0		0
YBR109C	CMD1,CaM	2	458013	458456	-	ATCGAACTACAAAGAAAGAGCTTAGTTAATACAAATAAAAAAGTACAATG	ATGGATCAGGCGAGATCAACATTCAACAATTCGCTGCTTTGTTATCTAAA	GAATGGTAAGGGTAAGATAGCGGGAGCAAAAAATCACAAGGATGCACCTA	ATCGAACTACAAAGAAAGAGCTTAGTTAATACAAATAAAAAAGTACAATGCGGATCCCCGGGTTAATTAA	ATGGATCAGGCGAGATCAACATTCAACAATTCGCTGCTTTGTTATCTAAACGGATCCCCGGGTTAATTAA	GAATGGTAAGGGTAAGATAGCGGGAGCAAAAAATCACAAGGATGCACCTAGAATTCGAGCTCGTTTAAAC	0		0		0
YBR109W-A	YBR109W-A	2	458702	458926	+	TGTCTCAAATTGGGTGGAAAAGAGGGTGCTTGAATTCATTAGGACATATG	TTAATTGGTCATATATCTTTCAATCAGCAATTAGCAAAGCCATTAGAGGG	AAAAACATTTTCACCAATTGACTATAGCCCCTAAAATGCCGTTACAATTA	TGTCTCAAATTGGGTGGAAAAGAGGGTGCTTGAATTCATTAGGACATATGCGGATCCCCGGGTTAATTAA	TTAATTGGTCATATATCTTTCAATCAGCAATTAGCAAAGCCATTAGAGGGCGGATCCCCGGGTTAATTAA	AAAAACATTTTCACCAATTGACTATAGCCCCTAAAATGCCGTTACAATTAGAATTCGAGCTCGTTTAAAC	0		0		0
YBR110W	ALG1	2	458966	460315	+	GAGGGTAATTGTAACGGCATTTTAGGGGCTATAGTCAATTGGTGAAAATG	GATGGCAATCAAATTGGGAACGAACAATGAGAGATTTGAAGCTAATTCAT	GTCGAAAATAGTAATTTTCAAAAAAGAAAGGCTGAGTTACCATTGACTCA	GAGGGTAATTGTAACGGCATTTTAGGGGCTATAGTCAATTGGTGAAAATGCGGATCCCCGGGTTAATTAA	GATGGCAATCAAATTGGGAACGAACAATGAGAGATTTGAAGCTAATTCATCGGATCCCCGGGTTAATTAA	GTCGAAAATAGTAATTTTCAAAAAAGAAAGGCTGAGTTACCATTGACTCAGAATTCGAGCTCGTTTAAAC	0		0		0
YBR111C	YSA1,RMA2	2	461272	461967	-	GCTTTTATGATTATTCTTTCGGCATTTTCCTTCCTTCTCATACTTAGATG	TTCAAAACGTAGCTCAAGGTATCCTCATGGCCAAGCAATACCACATCAAA	ATTAACATCTCGCCTATTTTTCATACAGAAACACTACTTATCGCTATCTA	GCTTTTATGATTATTCTTTCGGCATTTTCCTTCCTTCTCATACTTAGATGCGGATCCCCGGGTTAATTAA	TTCAAAACGTAGCTCAAGGTATCCTCATGGCCAAGCAATACCACATCAAACGGATCCCCGGGTTAATTAA	ATTAACATCTCGCCTATTTTTCATACAGAAACACTACTTATCGCTATCTAGAATTCGAGCTCGTTTAAAC	0		0		0
YBR111W-A	SUS1	2	462233	462673	+	CAACACATGCGACAAAATCAGAAGTAACAATTCTGGCCTTCACTCCAATG	CCGTTTTAAAGCAAATAAGGGAATTTCTTGAAGAGATTGTAGATACACAA	TGAGCATATGTAATAATATTGGGAATTAAGGTGCATTTTCGTATCCTTCA	CAACACATGCGACAAAATCAGAAGTAACAATTCTGGCCTTCACTCCAATGCGGATCCCCGGGTTAATTAA	CCGTTTTAAAGCAAATAAGGGAATTTCTTGAAGAGATTGTAGATACACAACGGATCCCCGGGTTAATTAA	TGAGCATATGTAATAATATTGGGAATTAAGGTGCATTTTCGTATCCTTCAGAATTCGAGCTCGTTTAAAC	0		0		0
YBR112C	CYC8,SSN6,CRT8	2	462964	465864	-	GCAACAACAACAAACAAAACACGACTGGAAAAAAAAAATTAGGAAAAATG	CAAGAGAAAATGTAGTAAGGCAAGTGGAAGAAGATGAAAACTACGACGAC	TCTCGTTGATTATAAATTAGTAGATTAATTTTTTGAATGCAAACTTTTTA	GCAACAACAACAAACAAAACACGACTGGAAAAAAAAAATTAGGAAAAATGCGGATCCCCGGGTTAATTAA	CAAGAGAAAATGTAGTAAGGCAAGTGGAAGAAGATGAAAACTACGACGACCGGATCCCCGGGTTAATTAA	TCTCGTTGATTATAAATTAGTAGATTAATTTTTTGAATGCAAACTTTTTAGAATTCGAGCTCGTTTAAAC	1	YBR113W	1	YBR113W	0
YBR113W	YBR113W	2	465660	466142	+	TGTTAAAGCCTTTGCAGATGAGGGATTGAACTGTAAAGTGGCGTCATATG	GAACAGGAAACAAAAAACAAAAAGACAAAGAAAAAAATGCGCTTTTGCTT	TTTTATTTTTCTTTTCTTCGGTCGGTCGTTCTTTTCCCTTCCGATTATCA	TGTTAAAGCCTTTGCAGATGAGGGATTGAACTGTAAAGTGGCGTCATATGCGGATCCCCGGGTTAATTAA	GAACAGGAAACAAAAAACAAAAAGACAAAGAAAAAAATGCGCTTTTGCTTCGGATCCCCGGGTTAATTAA	TTTTATTTTTCTTTTCTTCGGTCGGTCGTTCTTTTCCCTTCCGATTATCAGAATTCGAGCTCGTTTAAAC	1	YBR112C	1	YBR112C	0
YBR114W	RAD16,PSO5	2	467342	469714	+	ATTTTAGATACTCTTGGCCGTATAACTGGTGTACCAACTGAAAAATCATG	CTGCCATTAGCAGACTAACGCCAGCTGATTTACAGTTCTTATTCAATAAC	TGTCACTTAAAAACTCCGAGAATAATATATAATAAGAGAATAAAATATTA	ATTTTAGATACTCTTGGCCGTATAACTGGTGTACCAACTGAAAAATCATGCGGATCCCCGGGTTAATTAA	CTGCCATTAGCAGACTAACGCCAGCTGATTTACAGTTCTTATTCAATAACCGGATCCCCGGGTTAATTAA	TGTCACTTAAAAACTCCGAGAATAATATATAATAAGAGAATAAAATATTAGAATTCGAGCTCGTTTAAAC	0		0		0
YBR115C	LYS2	2	469842	474020	-	AGTGAAAAACTGCTAATTATAGAGAGATATCACAGAGTTACTCACTAATG	TAAGTCTAGTTGCTTCAGGTGCTGGTGCTCGTGGAAGCTCCGCAGCAGCT	TCATATTTAATTATTGTACATGGACATATCATACGTAATGCTCAACCTTA	AGTGAAAAACTGCTAATTATAGAGAGATATCACAGAGTTACTCACTAATGCGGATCCCCGGGTTAATTAA	TAAGTCTAGTTGCTTCAGGTGCTGGTGCTCGTGGAAGCTCCGCAGCAGCTCGGATCCCCGGGTTAATTAA	TCATATTTAATTATTGTACATGGACATATCATACGTAATGCTCAACCTTAGAATTCGAGCTCGTTTAAAC	0		0		0
YBR116C	YBR116C	2	474293	474820	-	TGATATTATCCTGGTGTCAACAGGATCAGAAGTCTCCATTTCTATAGATG	ATTATTCGATTTTCTTCTTGCTGACCGCTTCTAGAGGCATCGCACAGTTT	ATTGCAAGTGGAATTCCGCTGGCAAAACTATTGAAGAGTTTTCCTCGCTA	TGATATTATCCTGGTGTCAACAGGATCAGAAGTCTCCATTTCTATAGATGCGGATCCCCGGGTTAATTAA	ATTATTCGATTTTCTTCTTGCTGACCGCTTCTAGAGGCATCGCACAGTTTCGGATCCCCGGGTTAATTAA	ATTGCAAGTGGAATTCCGCTGGCAAAACTATTGAAGAGTTTTCCTCGCTAGAATTCGAGCTCGTTTAAAC	1	YBR117C	1	YBR117C	0
YBR117C	TKL2	2	474486	476531	-	CTCTACGTAGACGATTATACCTTACTAATCAAAAAAAGAACAAAAAAATG	TCAATTACTACAAAGGAAAGCAGTTGCTTTCTCCTATGGGAAGAGCTTTC	TCAACCAGGAAGTGTGAAATAGCAAAGAACTGTTTACTTCTTCAGACTTA	CTCTACGTAGACGATTATACCTTACTAATCAAAAAAAGAACAAAAAAATGCGGATCCCCGGGTTAATTAA	TCAATTACTACAAAGGAAAGCAGTTGCTTTCTCCTATGGGAAGAGCTTTCCGGATCCCCGGGTTAATTAA	TCAACCAGGAAGTGTGAAATAGCAAAGAACTGTTTACTTCTTCAGACTTAGAATTCGAGCTCGTTTAAAC	1	YBR116C	1	YBR116C	0
YBR118W	TEF2,EF-1%20alpha	2	477765	479141	+	GTACTTGTTTTTAGAATATACGGTCAACGAACTATAATTAACTAAACATG	CTGAAAAGGCCGCTAAGGTTACCAAGGCTGCTCAAAAGGCTGCTAAGAAA	AATAAGAGGTATATAAAAATATTATATGGAAGCAATAATTATTACTCTTA	GTACTTGTTTTTAGAATATACGGTCAACGAACTATAATTAACTAAACATGCGGATCCCCGGGTTAATTAA	CTGAAAAGGCCGCTAAGGTTACCAAGGCTGCTCAAAAGGCTGCTAAGAAACGGATCCCCGGGTTAATTAA	AATAAGAGGTATATAAAAATATTATATGGAAGCAATAATTATTACTCTTAGAATTCGAGCTCGTTTAAAC	0		0		0
YBR119W	MUD1	2	479432	480417	+	AAAAGCTGCTATCAACAAAAGACGGCCTCATCAAACCTAAAGAAACCATG	GCTCCACTTACAAGCTACAAAACAATGACGTTACCATAGGATTTGCTAAG	TTATCTGTGAATTTCTTTACTCGAGGTATACTTCCGCAAAGGAAATTCTA	AAAAGCTGCTATCAACAAAAGACGGCCTCATCAAACCTAAAGAAACCATGCGGATCCCCGGGTTAATTAA	GCTCCACTTACAAGCTACAAAACAATGACGTTACCATAGGATTTGCTAAGCGGATCCCCGGGTTAATTAA	TTATCTGTGAATTTCTTTACTCGAGGTATACTTCCGCAAAGGAAATTCTAGAATTCGAGCTCGTTTAAAC	0		0		0
YBR120C	CBP6	2	480529	481017	-	TATCAGCTTACCAAGTTAAACTCCGTATTCCACAAGCAAGTGCCAAAATG	AGAAAAAGGAAAGCTTATTTACTGCAATGAGAACTGTATTATTTGGTAAA	CATTATGAATAAATATGTATTTACAAGCTTAGAAAATAATGTGCTCTTTA	TATCAGCTTACCAAGTTAAACTCCGTATTCCACAAGCAAGTGCCAAAATGCGGATCCCCGGGTTAATTAA	AGAAAAAGGAAAGCTTATTTACTGCAATGAGAACTGTATTATTTGGTAAACGGATCCCCGGGTTAATTAA	CATTATGAATAAATATGTATTTACAAGCTTAGAAAATAATGTGCTCTTTAGAATTCGAGCTCGTTTAAAC	0		0		0
YBR121C	GRS1	2	481458	483461	-	GACGATTTTACTCTCAGATTGTTAAAAAATCGGTTAAGATTAAAAGAATG	AGGATTTGACTCCTTTTATTGCCCAAGCTGAAGCTGAAGCTGAAACTGAC	TTTAATTTACATGTTTGGCGATATATAGTTAAAATTAAGTCATTTATTTA	GACGATTTTACTCTCAGATTGTTAAAAAATCGGTTAAGATTAAAAGAATGCGGATCCCCGGGTTAATTAA	AGGATTTGACTCCTTTTATTGCCCAAGCTGAAGCTGAAGCTGAAACTGACCGGATCCCCGGGTTAATTAA	TTTAATTTACATGTTTGGCGATATATAGTTAAAATTAAGTCATTTATTTAGAATTCGAGCTCGTTTAAAC	1	YBR121C-A	1	YBR121C-A	0
YBR121C-A	YBR121C-A	2	482420	482578	-	GATTGAACATTTCGTTGACCCATTGGACAAATCTCATCCAAAATTTAATG	GGTCGATAATGAAACTTTGGGTTACTTTATTGCCAGAATTTACCAATTTT	CATATGTTGACGGAATCTCAATTTGGACTCATCAACACCAATTTTCATCA	GATTGAACATTTCGTTGACCCATTGGACAAATCTCATCCAAAATTTAATGCGGATCCCCGGGTTAATTAA	GGTCGATAATGAAACTTTGGGTTACTTTATTGCCAGAATTTACCAATTTTCGGATCCCCGGGTTAATTAA	CATATGTTGACGGAATCTCAATTTGGACTCATCAACACCAATTTTCATCAGAATTCGAGCTCGTTTAAAC	1	YBR121C	1	YBR121C	0
YBR122C	MRPL36	2	484064	484597	-	AAAGAACGGGTACCAACGCAAACGAACACACGTTTTGTTCACTCCTAATG	AACAACAGATCAAATCAGGTAAGTTGGCCAGTAAGAAGAGAGACAAGAAG	AATATAAATTGGTTCGAGAATAGAAAAGTAAGGGGAGCAAACACTATTCA	AAAGAACGGGTACCAACGCAAACGAACACACGTTTTGTTCACTCCTAATGCGGATCCCCGGGTTAATTAA	AACAACAGATCAAATCAGGTAAGTTGGCCAGTAAGAAGAGAGACAAGAAGCGGATCCCCGGGTTAATTAA	AATATAAATTGGTTCGAGAATAGAAAAGTAAGGGGAGCAAACACTATTCAGAATTCGAGCTCGTTTAAAC	0		0		0
YBR123C	TFC1	2	484836	486785	-	TAATCTCTATAGCTTTCAAGAGCGAAAATATCTTCCAAATCGTGAAAATG	CGGAAACAATGAAAAGCGAGCTCAAGGGATTTGTTGATGAAGTCGATCTG	TGCACATTTGGCATATTTTGATATTGAAATAAAAGAAAACCTACTTATTA	TAATCTCTATAGCTTTCAAGAGCGAAAATATCTTCCAAATCGTGAAAATGCGGATCCCCGGGTTAATTAA	CGGAAACAATGAAAAGCGAGCTCAAGGGATTTGTTGATGAAGTCGATCTGCGGATCCCCGGGTTAATTAA	TGCACATTTGGCATATTTTGATATTGAAATAAAAGAAAACCTACTTATTAGAATTCGAGCTCGTTTAAAC	1	YBR124W	1	YBR124W	0
YBR124W	YBR124W	2	486601	486960	+	GAGATTCGATAGGTCCATGTTCTTTAAAGGCTTCTTTCACTTTTTCGATG	TTTTCAGAAAGACCAAAAGCGAAGAAGCGAAGAAGAGGACTTCTCTGTAC	ATAAATTCACATATTCATGTTTAGTTTTCCTTTTACATAATTTGGTCTTA	GAGATTCGATAGGTCCATGTTCTTTAAAGGCTTCTTTCACTTTTTCGATGCGGATCCCCGGGTTAATTAA	TTTTCAGAAAGACCAAAAGCGAAGAAGCGAAGAAGAGGACTTCTCTGTACCGGATCCCCGGGTTAATTAA	ATAAATTCACATATTCATGTTTAGTTTTCCTTTTACATAATTTGGTCTTAGAATTCGAGCTCGTTTAAAC	1	YBR123C	1	YBR123C	0
YBR125C	PTC4,GCT1	2	487293	488474	-	CCTATATAGCCATTTTAGAAAGTAACTTCAATTTGAAGAAGACAAAAATG	ACTGGTTTAATAAAATGAAGACCCGTTTGGAAAGAGAAAGGGGCCTAGTG	TTCAGATATGTATGAGAAAAAGGAAGAAGAAAAATAATTTTTTTTCCTTA	CCTATATAGCCATTTTAGAAAGTAACTTCAATTTGAAGAAGACAAAAATGCGGATCCCCGGGTTAATTAA	ACTGGTTTAATAAAATGAAGACCCGTTTGGAAAGAGAAAGGGGCCTAGTGCGGATCCCCGGGTTAATTAA	TTCAGATATGTATGAGAAAAAGGAAGAAGAAAAATAATTTTTTTTCCTTAGAATTCGAGCTCGTTTAAAC	0		0		0
YBR126C	TPS1,TSS1,GLC6,GGS1,FDP1,CIF1,BYP1	2	488999	490486	-	GCTAACAAACTAGGTACTCACATACAGACTTATTAAGACATAGAACTATG	AATTATACAGTACATCATCAAGCTCAACAAGCTCCTCTGCCACCAAAAAC	GAAAACCGGACCAGGAATAGACGATCGTCTCATTTGCATCGGGTTCATCA	GCTAACAAACTAGGTACTCACATACAGACTTATTAAGACATAGAACTATGCGGATCCCCGGGTTAATTAA	AATTATACAGTACATCATCAAGCTCAACAAGCTCCTCTGCCACCAAAAACCGGATCCCCGGGTTAATTAA	GAAAACCGGACCAGGAATAGACGATCGTCTCATTTGCATCGGGTTCATCAGAATTCGAGCTCGTTTAAAC	0		0		0
YBR126W-A	YBR126W-A	2	490944	491150	+	GTTCTGGTGCAGATGGAACAGAACAATCGCAACAAGAGCACGAAGATATG	AAAAAGAGCAAATCAAGCGTCTCCACCAGTTGGACGGCATTCCTCACGCT	GAAAAAAAAAAAAGAAAAAGATCAAGGAACACATCACCCTGGGCACATCA	GTTCTGGTGCAGATGGAACAGAACAATCGCAACAAGAGCACGAAGATATGCGGATCCCCGGGTTAATTAA	AAAAAGAGCAAATCAAGCGTCTCCACCAGTTGGACGGCATTCCTCACGCTCGGATCCCCGGGTTAATTAA	GAAAAAAAAAAAAGAAAAAGATCAAGGAACACATCACCCTGGGCACATCAGAATTCGAGCTCGTTTAAAC	1	YBR126W-B	1	YBR126W-B	0
YBR126W-B	YBR126W-B	2	491021	491164	+	GAACAACAGCATCAACCACAGAACGGACCGCTCGACTATGCTCACATATG	AAGCGTCTCCACCAGTTGGACGGCATTCCTCACGCTTGATGTGCCCAGGG	CATAATCCGTAATTGAAAAAAAAAAAAGAAAAAGATCAAGGAACACATCA	GAACAACAGCATCAACCACAGAACGGACCGCTCGACTATGCTCACATATGCGGATCCCCGGGTTAATTAA	AAGCGTCTCCACCAGTTGGACGGCATTCCTCACGCTTGATGTGCCCAGGGCGGATCCCCGGGTTAATTAA	CATAATCCGTAATTGAAAAAAAAAAAAGAAAAAGATCAAGGAACACATCAGAATTCGAGCTCGTTTAAAC	1	YBR126W-A	1	YBR126W-A	0
YBR127C	VMA2,ATPSV,VAT2	2	491363	492916	-	GATTGTAAGAGTAGACAGTACATCAAGCGAAAATAAATATTGCAGGAATG	CAAGAAGCTCCGGTAAGAAGAAGGACGCCAGCCAAGAAGAATCTCTAATC	AAAAACGGACAAAATAAAAAAAGCCTTTTTCTTCAGCAACCGTCCTCTTA	GATTGTAAGAGTAGACAGTACATCAAGCGAAAATAAATATTGCAGGAATGCGGATCCCCGGGTTAATTAA	CAAGAAGCTCCGGTAAGAAGAAGGACGCCAGCCAAGAAGAATCTCTAATCCGGATCCCCGGGTTAATTAA	AAAAACGGACAAAATAAAAAAAGCCTTTTTCTTCAGCAACCGTCCTCTTAGAATTCGAGCTCGTTTAAAC	0		0		0
YBR128C	ATG14,APG14,CVT12	2	493175	494209	-	TAGAGAAAAAGGGAAGTAAAAGTTAAAAACTAGAATCCTAGTATGACATG	CACCACCTCCAACAGTCACAGGACCTCATGACCGATGGTACGTGGTAGGC	TGACTACATGCAACTTTATACACACGGCAGGAAAAAAAGTGCGCACTCTA	TAGAGAAAAAGGGAAGTAAAAGTTAAAAACTAGAATCCTAGTATGACATGCGGATCCCCGGGTTAATTAA	CACCACCTCCAACAGTCACAGGACCTCATGACCGATGGTACGTGGTAGGCCGGATCCCCGGGTTAATTAA	TGACTACATGCAACTTTATACACACGGCAGGAAAAAAAGTGCGCACTCTAGAATTCGAGCTCGTTTAAAC	0		0		0
YBR129C	OPY1	2	494447	495433	-	CCATAAATAATTACGCTAATTTTGCCTTGGTAAATTTCATAAGACCAATG	ATTTCAAGAGTGGAATTTTGATAAGAAAAAAATTAAAGGCCGAAAATATA	TAGTACAAAGAAAAAAAAAGTCAATACATATTCATCATTGGCATTGCTTA	CCATAAATAATTACGCTAATTTTGCCTTGGTAAATTTCATAAGACCAATGCGGATCCCCGGGTTAATTAA	ATTTCAAGAGTGGAATTTTGATAAGAAAAAAATTAAAGGCCGAAAATATACGGATCCCCGGGTTAATTAA	TAGTACAAAGAAAAAAAAAGTCAATACATATTCATCATTGGCATTGCTTAGAATTCGAGCTCGTTTAAAC	0		0		0
YBR130C	SHE3	2	495686	496963	-	TCGTCTATCAAGCACGCCAAGGTTCAACGACACTACTTTTGTGTAAGATG	CCACTCATAAGAAAAAGGGAAATAGTATGGTTGTTCACGGGGCCCAATCC	ATTATCTAAATGAATCCTATATATATACTCCCTTGTGTCGGCATATTCTA	TCGTCTATCAAGCACGCCAAGGTTCAACGACACTACTTTTGTGTAAGATGCGGATCCCCGGGTTAATTAA	CCACTCATAAGAAAAAGGGAAATAGTATGGTTGTTCACGGGGCCCAATCCCGGATCCCCGGGTTAATTAA	ATTATCTAAATGAATCCTATATATATACTCCCTTGTGTCGGCATATTCTAGAATTCGAGCTCGTTTAAAC	0		0		0
YBR131W	CCZ1,CVT16	2	497257	499371	+	TACATTCTAAATCGTACAACTATTAAATTGATATATGAAAGACGGATATG	TTCAAAGTTTAGGTCGTGACGTGACTGACTGGTGGGAATCCAGGGAAATT	GTTACTTATTTTTATTCTATGTCTATCAAATGCTAAACGTTACATTTTTA	TACATTCTAAATCGTACAACTATTAAATTGATATATGAAAGACGGATATGCGGATCCCCGGGTTAATTAA	TTCAAAGTTTAGGTCGTGACGTGACTGACTGGTGGGAATCCAGGGAAATTCGGATCCCCGGGTTAATTAA	GTTACTTATTTTTATTCTATGTCTATCAAATGCTAAACGTTACATTTTTAGAATTCGAGCTCGTTTAAAC	1	YBR131C-A	1	YBR131C-A	0
YBR131C-A	YBR131C-A	2	497744	497833	-	ATAACTCTTTTTATCTAAAAGAATATTCTGCAAGATTATAGCGTCCCATG	AGAGGAATGTTGAAAATTTGCCCTTTTATAAAAACCAGGCCACATTACAG	CTGGAATGATATTTATTTGAATCTAGAAACTGTAACGAATAGATCATTTA	ATAACTCTTTTTATCTAAAAGAATATTCTGCAAGATTATAGCGTCCCATGCGGATCCCCGGGTTAATTAA	AGAGGAATGTTGAAAATTTGCCCTTTTATAAAAACCAGGCCACATTACAGCGGATCCCCGGGTTAATTAA	CTGGAATGATATTTATTTGAATCTAGAAACTGTAACGAATAGATCATTTAGAATTCGAGCTCGTTTAAAC	1	YBR131W	1	YBR131W	0
YBR132C	AGP2	2	499746	501536	-	CCCCCCTAAGCTGCACTTACATTTTGCTTCCATAACTTTTGCCAAGCATG	ACCATGAGATTGAAAGCTCCTTCGAAAAATTTCAATATTATAGCAAAGCA	TTTGGAGGCAGTCAATGTAAATTTGTGAATATAACGACATAATTGCATTA	CCCCCCTAAGCTGCACTTACATTTTGCTTCCATAACTTTTGCCAAGCATGCGGATCCCCGGGTTAATTAA	ACCATGAGATTGAAAGCTCCTTCGAAAAATTTCAATATTATAGCAAAGCACGGATCCCCGGGTTAATTAA	TTTGGAGGCAGTCAATGTAAATTTGTGAATATAACGACATAATTGCATTAGAATTCGAGCTCGTTTAAAC	0		0		0
YBR133C	HSL7	2	501898	504381	-	TCTTTTATACATATAATTTTTATATATACAAAGGGTTCAGTTTGCATATG	GTGTTTCCACGCTACATAATGTCTGTGGCAGAGCCTTTTCCCTGCCTCTG	TATGGATAGTTATTTGTTGCCGCAGTATATAGTATACAATGCAGAATTCA	TCTTTTATACATATAATTTTTATATATACAAAGGGTTCAGTTTGCATATGCGGATCCCCGGGTTAATTAA	GTGTTTCCACGCTACATAATGTCTGTGGCAGAGCCTTTTCCCTGCCTCTGCGGATCCCCGGGTTAATTAA	TATGGATAGTTATTTGTTGCCGCAGTATATAGTATACAATGCAGAATTCAGAATTCGAGCTCGTTTAAAC	1	YBR134W	1	YBR134W	0
YBR134W	YBR134W	2	504337	504738	+	TGACTAGAGACATTTTCTAGGAAACGTGACTTTTTGCTGTGCTGTTTATG	AGAATTTTCAGATAAAACAGTACTCGAGCCCTGAGATCTGTTTTAGGGTC	TACCACGAGAAAAAAAAATCACCTGACATATTTTTATAACCCGCCTTTTA	TGACTAGAGACATTTTCTAGGAAACGTGACTTTTTGCTGTGCTGTTTATGCGGATCCCCGGGTTAATTAA	AGAATTTTCAGATAAAACAGTACTCGAGCCCTGAGATCTGTTTTAGGGTCCGGATCCCCGGGTTAATTAA	TACCACGAGAAAAAAAAATCACCTGACATATTTTTATAACCCGCCTTTTAGAATTCGAGCTCGTTTAAAC	1	YBR133C	1	YBR133C	0
YBR135W	CKS1	2	504948	505400	+	TTGGATACAACTAGATTGACACGCACTTACTCTCGTCTTACAGTACTATG	ATCAAACACAATCGATTTCGAACGATATGCAAGTTCCACCCCAAATCTCC	GGAGCCTTGAAAAGGAATTCAATTTCAGTAATTAGAGTATATCAAAGCTA	TTGGATACAACTAGATTGACACGCACTTACTCTCGTCTTACAGTACTATGCGGATCCCCGGGTTAATTAA	ATCAAACACAATCGATTTCGAACGATATGCAAGTTCCACCCCAAATCTCCCGGATCCCCGGGTTAATTAA	GGAGCCTTGAAAAGGAATTCAATTTCAGTAATTAGAGTATATCAAAGCTAGAATTCGAGCTCGTTTAAAC	0		0		0
YBR136W	MEC1,SAD3,ESR1	2	505762	512868	+	CTGGACAACAAGAACGACATACACCGCGTAAAGGCCCACAAGACTGCATG	CATCAGAAGACAATCTAAGCAAGATGTATATTGGTTGGCTTCCATTTTGG	TTAGATCAAGAGGAAGTTCGTCTGTTGCCGAAAATGGTGGAAAGTCGTTA	CTGGACAACAAGAACGACATACACCGCGTAAAGGCCCACAAGACTGCATGCGGATCCCCGGGTTAATTAA	CATCAGAAGACAATCTAAGCAAGATGTATATTGGTTGGCTTCCATTTTGGCGGATCCCCGGGTTAATTAA	TTAGATCAAGAGGAAGTTCGTCTGTTGCCGAAAATGGTGGAAAGTCGTTAGAATTCGAGCTCGTTTAAAC	0		0		0
YBR137W	YBR137W	2	513138	513677	+	TATTATAAGAGCAAATTATTCAAAAAAAGTCTACGGAGAAAATTATTATG	CTTTAATTGCATTTGCTAATGAAAGTCTAGAAGAAGATTTGAATTTGGAT	AAATATTCTATGGTGTTCAAGCCTCTATTTTACTTCTACCTACATTCTCA	TATTATAAGAGCAAATTATTCAAAAAAAGTCTACGGAGAAAATTATTATGCGGATCCCCGGGTTAATTAA	CTTTAATTGCATTTGCTAATGAAAGTCTAGAAGAAGATTTGAATTTGGATCGGATCCCCGGGTTAATTAA	AAATATTCTATGGTGTTCAAGCCTCTATTTTACTTCTACCTACATTCTCAGAATTCGAGCTCGTTTAAAC	0		0		0
YBR138C	YBR138C	2	513856	515430	-	TCTCGAAAACTTGATCCAACCACTAATTAAAAGGTTAAAATTAAAGGATG	TTCCGCATTTCTTACGCAATCAAAATAGTGATCGTTTAAATTTTCAACCT	CACCAATGCAGTCCTGTTTGTTTTAGTGATCTCTTAGCAATGTATTTTCA	TCTCGAAAACTTGATCCAACCACTAATTAAAAGGTTAAAATTAAAGGATGCGGATCCCCGGGTTAATTAA	TTCCGCATTTCTTACGCAATCAAAATAGTGATCGTTTAAATTTTCAACCTCGGATCCCCGGGTTAATTAA	CACCAATGCAGTCCTGTTTGTTTTAGTGATCTCTTAGCAATGTATTTTCAGAATTCGAGCTCGTTTAAAC	0		0		0
YBR139W	YBR139W	2	515758	517284	+	GCATTTTTTCTTTAAAACAGCTATACAAAAAGTGATACCGACATACAATG	TTTCCGGTAATCGTGCTTTTTCGGATCTTTCCACCTTGGAAAATGCTAGT	AAGTATAATGATTGCAAGGTTAAGAGTGAAACATTTTTAGAGCACTACTA	GCATTTTTTCTTTAAAACAGCTATACAAAAAGTGATACCGACATACAATGCGGATCCCCGGGTTAATTAA	TTTCCGGTAATCGTGCTTTTTCGGATCTTTCCACCTTGGAAAATGCTAGTCGGATCCCCGGGTTAATTAA	AAGTATAATGATTGCAAGGTTAAGAGTGAAACATTTTTAGAGCACTACTAGAATTCGAGCTCGTTTAAAC	0		0		0
YBR140C	IRA1,PPD1,GLC1	2	517444	526722	-	TTCTTCTTCAGCATATAACATACAACAAGATTAAGGCTCTTTCTAAAATG	ATGAGAGAAAAAGATTAGCAACAATGATACTGGCAAGAATGTCGTGCTCC	ATTATAAGGAAAAACGTATATAATCACTGCAATACTCTAATTTAAAATTA	TTCTTCTTCAGCATATAACATACAACAAGATTAAGGCTCTTTCTAAAATGCGGATCCCCGGGTTAATTAA	ATGAGAGAAAAAGATTAGCAACAATGATACTGGCAAGAATGTCGTGCTCCCGGATCCCCGGGTTAATTAA	ATTATAAGGAAAAACGTATATAATCACTGCAATACTCTAATTTAAAATTAGAATTCGAGCTCGTTTAAAC	0		0		0
YBR141C	YBR141C	2	527119	528132	-	TTGATGGCAATCTTGTATCAGCTTAGCGATACCACTAATACAGCGGAATG	GAATCAAGGTTAACGACGGCCCTGGGTTGAACAATTTTGGTATTACCCTC	CTATATTGTATCCCTTTATGAAAAACTTCCAGGCGGTGTCGGCTCGCTTA	TTGATGGCAATCTTGTATCAGCTTAGCGATACCACTAATACAGCGGAATGCGGATCCCCGGGTTAATTAA	GAATCAAGGTTAACGACGGCCCTGGGTTGAACAATTTTGGTATTACCCTCCGGATCCCCGGGTTAATTAA	CTATATTGTATCCCTTTATGAAAAACTTCCAGGCGGTGTCGGCTCGCTTAGAATTCGAGCTCGTTTAAAC	1	YBR141W-A	1	YBR141W-A	0
YBR141W-A	YBR141W-A	2	527261	527356	+	GATACAAACAATAGTACAACTTATTACTTTGATGGCTATTAAGCATTATG	CGCAGTATCTTGAGTGCGTCACACAGGCTTGTGGCAGAACAATAAAGATG	CGCGGTGCAATGTGCCATCGCATGGTCAAATTTCTCAAGCCGCAAGGCTA	GATACAAACAATAGTACAACTTATTACTTTGATGGCTATTAAGCATTATGCGGATCCCCGGGTTAATTAA	CGCAGTATCTTGAGTGCGTCACACAGGCTTGTGGCAGAACAATAAAGATGCGGATCCCCGGGTTAATTAA	CGCGGTGCAATGTGCCATCGCATGGTCAAATTTCTCAAGCCGCAAGGCTAGAATTCGAGCTCGTTTAAAC	1	YBR141C	1	YBR141C	0
YBR142W	MAK5	2	528411	530732	+	AGGTAGAAATTCTTTAGTCAAATACCGGCATAATCAGTTTTTCCATCATG	AAAAGACAAACGCCTTAGAAACTTTGAAGAAAAAGAAAAAGAGAAATAAT	CGTAGAAAATACAGTGAAAGGAGAGTTTCTCTTCAAAAGCCTCGAGATTA	AGGTAGAAATTCTTTAGTCAAATACCGGCATAATCAGTTTTTCCATCATGCGGATCCCCGGGTTAATTAA	AAAAGACAAACGCCTTAGAAACTTTGAAGAAAAAGAAAAAGAGAAATAATCGGATCCCCGGGTTAATTAA	CGTAGAAAATACAGTGAAAGGAGAGTTTCTCTTCAAAAGCCTCGAGATTAGAATTCGAGCTCGTTTAAAC	0		0		0
YBR143C	SUP45,SUP47,SUP1,SAL4	2	530963	532276	-	GTCTCCTTATTAAGACTACAGAAATAGACAAAGGAAATACTTCAATAATG	CTGAGGATGAATATTATGACGAAGATGAAGGATCCGACTATGATTTCATT	TGATTAAATTCTTTTTGATTCGATTTTTTTCTCCCCCTTTTATTTATTTA	GTCTCCTTATTAAGACTACAGAAATAGACAAAGGAAATACTTCAATAATGCGGATCCCCGGGTTAATTAA	CTGAGGATGAATATTATGACGAAGATGAAGGATCCGACTATGATTTCATTCGGATCCCCGGGTTAATTAA	TGATTAAATTCTTTTTGATTCGATTTTTTTCTCCCCCTTTTATTTATTTAGAATTCGAGCTCGTTTAAAC	0		0		0
YBR144C	YBR144C	2	533329	533643	-	ACGATCCCGCGTCAGCAGATGTCACAATTTGATTATTTCATTGTCACATG	TCATGAAGACACTACTTGTAAAATTATATATATCCTTTTTTTTCATGTGC	TCCTCGAAGTTGCGTCGAAGATGAATGAAAGTAGTTGCTAATTCTTACTA	ACGATCCCGCGTCAGCAGATGTCACAATTTGATTATTTCATTGTCACATGCGGATCCCCGGGTTAATTAA	TCATGAAGACACTACTTGTAAAATTATATATATCCTTTTTTTTCATGTGCCGGATCCCCGGGTTAATTAA	TCCTCGAAGTTGCGTCGAAGATGAATGAAAGTAGTTGCTAATTCTTACTAGAATTCGAGCTCGTTTAAAC	0		0		0
YBR145W	ADH5	2	533856	534911	+	ATACCTAAGAAAATTATTTAACTACATATCTACAAAATCAAAGCATCATG	AGATGGAGAAGGGTGAAATTGTTGGTAGATATGTTGTTGAGACTTCTAAA	GCTTATATAAAAAGTAAAAATATATTCATCAAATTCGTTACAAAAGATCA	ATACCTAAGAAAATTATTTAACTACATATCTACAAAATCAAAGCATCATGCGGATCCCCGGGTTAATTAA	AGATGGAGAAGGGTGAAATTGTTGGTAGATATGTTGTTGAGACTTCTAAACGGATCCCCGGGTTAATTAA	GCTTATATAAAAAGTAAAAATATATTCATCAAATTCGTTACAAAAGATCAGAATTCGAGCTCGTTTAAAC	0		0		0
YBR146W	MRPS9	2	535354	536190	+	GATTAGCTAAAATTTACTCGTTGTGGACAGAGTTTGAGCCAAGCGGAATG	AGAAGCCAGGAAAAAAGAAGGCAAGAAAGATGCCAACATGGGTCAAGAGA	AGCACGCACGCTTCCGTTCGAAATTGAGGTAACAAGATGCACTAAGACTA	GATTAGCTAAAATTTACTCGTTGTGGACAGAGTTTGAGCCAAGCGGAATGCGGATCCCCGGGTTAATTAA	AGAAGCCAGGAAAAAAGAAGGCAAGAAAGATGCCAACATGGGTCAAGAGACGGATCCCCGGGTTAATTAA	AGCACGCACGCTTCCGTTCGAAATTGAGGTAACAAGATGCACTAAGACTAGAATTCGAGCTCGTTTAAAC	0		0		0
YBR147W	YBR147W	2	536669	537559	+	ATAACCCAGACGTAATAGCCTCAAGCGAGCATCCCTAAATTTCTGCCATG	AATTTTTCCTTTACGCCAAACCTAAATACGAGAAAATACTAATAGATAAT	TGAGTAAGTTTGAGTTTTAAGTGGAAAGATTAATAGAAGCCAACTAGTTA	ATAACCCAGACGTAATAGCCTCAAGCGAGCATCCCTAAATTTCTGCCATGCGGATCCCCGGGTTAATTAA	AATTTTTCCTTTACGCCAAACCTAAATACGAGAAAATACTAATAGATAATCGGATCCCCGGGTTAATTAA	TGAGTAAGTTTGAGTTTTAAGTGGAAAGATTAATAGAAGCCAACTAGTTAGAATTCGAGCTCGTTTAAAC	0		0		0
YBR148W	YSW1	2	537970	539799	+	TGCACCGGTGTATTAACATATATAAGGATACGTACGAACATAACATCATG	GTACAAAGTTGATAAAAGACAGCAAGAATGGCGCCTCCACCTTAACATCT	GATACTTAATGATTATATACTAGTAGCATTTTCAGTAAACGAAATTGTTA	TGCACCGGTGTATTAACATATATAAGGATACGTACGAACATAACATCATGCGGATCCCCGGGTTAATTAA	GTACAAAGTTGATAAAAGACAGCAAGAATGGCGCCTCCACCTTAACATCTCGGATCCCCGGGTTAATTAA	GATACTTAATGATTATATACTAGTAGCATTTTCAGTAAACGAAATTGTTAGAATTCGAGCTCGTTTAAAC	0		0		0
YBR149W	ARA1	2	540081	541115	+	TCCGCCTTCAATTGATAAAAGCGTCTTGATTTTAATCAACTGCTATCATG	TCCTTCCAGAGTTTACTGGTAACGGACCAAACTTGGACAATTTAAAGTAT	ACAAGATTAAGAAGCGAACTAAATAAAGTGAAAATAAAGTCGTTGTCTTA	TCCGCCTTCAATTGATAAAAGCGTCTTGATTTTAATCAACTGCTATCATGCGGATCCCCGGGTTAATTAA	TCCTTCCAGAGTTTACTGGTAACGGACCAAACTTGGACAATTTAAAGTATCGGATCCCCGGGTTAATTAA	ACAAGATTAAGAAGCGAACTAAATAAAGTGAAAATAAAGTCGTTGTCTTAGAATTCGAGCTCGTTTAAAC	0		0		0
YBR150C	TBS1	2	541303	544587	-	TCTTTTTTAAGTTAACAATGATTACAAGCCCAGCAGGAGTTGTGTGAATG	TTTTTTTTTACGATCGGGATTTCTTCTTCAAGAATGTGTGTGTAAAAATG	GTATGCATATGTATTAGTTAAATTACTCGAATGTCCTTTATATAATATTA	TCTTTTTTAAGTTAACAATGATTACAAGCCCAGCAGGAGTTGTGTGAATGCGGATCCCCGGGTTAATTAA	TTTTTTTTTACGATCGGGATTTCTTCTTCAAGAATGTGTGTGTAAAAATGCGGATCCCCGGGTTAATTAA	GTATGCATATGTATTAGTTAAATTACTCGAATGTCCTTTATATAATATTAGAATTCGAGCTCGTTTAAAC	0		0		0
YBR151W	APD1	2	545122	546072	+	GGCAAGAAGGCGGCCAAGAGAGAGATATCTTCTTTGTCCTTTGAATTATG	CGTTGCCGTTTCCCGAAAAAGTTCGCTGTATTAAGAAATATCAAAGCTGG	ATGGCAAATTTTATGGCGTCAAAAGATTGTATTTTGCTGGCCAACCTTTA	GGCAAGAAGGCGGCCAAGAGAGAGATATCTTCTTTGTCCTTTGAATTATGCGGATCCCCGGGTTAATTAA	CGTTGCCGTTTCCCGAAAAAGTTCGCTGTATTAAGAAATATCAAAGCTGGCGGATCCCCGGGTTAATTAA	ATGGCAAATTTTATGGCGTCAAAAGATTGTATTTTGCTGGCCAACCTTTAGAATTCGAGCTCGTTTAAAC	0		0		0
YBR152W	SPP381	2	546470	547345	+	CCGCTAGATTAAGAATTTTTTTTGGTTACTGATTTGAATCACATACGATG	ACCTAGGCAAGAATAGTAGAGATTACGAAGAAACTGAATATTCGGTTATA	ACATCAACTAACTGAAAGGCATGTGGGTTTGTGTGTGTGATGCGGTGTTA	CCGCTAGATTAAGAATTTTTTTTGGTTACTGATTTGAATCACATACGATGCGGATCCCCGGGTTAATTAA	ACCTAGGCAAGAATAGTAGAGATTACGAAGAAACTGAATATTCGGTTATACGGATCCCCGGGTTAATTAA	ACATCAACTAACTGAAAGGCATGTGGGTTTGTGTGTGTGATGCGGTGTTAGAATTCGAGCTCGTTTAAAC	0		0		0
YBR153W	RIB7	2	547554	548288	+	AACCTATTGGTAGCTTCTTTGTATTACTATCAACATTTTTAGAAGATATG	GGTGGAAGGGCATTACCGATGTGGTGCTTTGTGCGAGACTGGCCGATGAC	CACTAATTTCAGAAAGAAATTACACAGAAGGTGGAGTTCTAACACTATTA	AACCTATTGGTAGCTTCTTTGTATTACTATCAACATTTTTAGAAGATATGCGGATCCCCGGGTTAATTAA	GGTGGAAGGGCATTACCGATGTGGTGCTTTGTGCGAGACTGGCCGATGACCGGATCCCCGGGTTAATTAA	CACTAATTTCAGAAAGAAATTACACAGAAGGTGGAGTTCTAACACTATTAGAATTCGAGCTCGTTTAAAC	0		0		0
YBR154C	RPB5	2	548456	549103	-	ATTTACAAAATTTGTGCGCAGGTGGATATTACTAATAAGCTAAGACAATG	TAAGAAAAAGTGAAACCTCTGGTCGTTATGCCAGTTACAGAATCTGTATG	TTCTTGTTATTTTATATTATATGAAAGGGGTAAATCCAAATGCCACTCTA	ATTTACAAAATTTGTGCGCAGGTGGATATTACTAATAAGCTAAGACAATGCGGATCCCCGGGTTAATTAA	TAAGAAAAAGTGAAACCTCTGGTCGTTATGCCAGTTACAGAATCTGTATGCGGATCCCCGGGTTAATTAA	TTCTTGTTATTTTATATTATATGAAAGGGGTAAATCCAAATGCCACTCTAGAATTCGAGCTCGTTTAAAC	0		0		0
YBR155W	CNS1	2	549865	551022	+	ACATTCTAGCAAGTAAAAGAAAAGAATAAATTGGTTTTGCATCTAGAATG	GGTGGATTTCCAAGTGGGATAAGCAAAAAGCCTTAGAAAGAAGATCTGTG	ATTTCTATCTACAACTTTGCGTTACATATTTTTAACTATTTGACACTTCA	ACATTCTAGCAAGTAAAAGAAAAGAATAAATTGGTTTTGCATCTAGAATGCGGATCCCCGGGTTAATTAA	GGTGGATTTCCAAGTGGGATAAGCAAAAAGCCTTAGAAAGAAGATCTGTGCGGATCCCCGGGTTAATTAA	ATTTCTATCTACAACTTTGCGTTACATATTTTTAACTATTTGACACTTCAGAATTCGAGCTCGTTTAAAC	0		0		0
YBR156C	SLI15	2	551198	553294	-	GTATCTCCTCAACTGACGGACTTTGAAAGAGCCCGAAGATTTAAACAATG	ATCCTAGGCTAAACAGGTTGAAACCGCGTCAAATTGTGCCCAAAAGGTCT	ATTTAATGTTAACCAGTTTGAATTTTTCTTTTCTGGGGTAATCGAATTCA	GTATCTCCTCAACTGACGGACTTTGAAAGAGCCCGAAGATTTAAACAATGCGGATCCCCGGGTTAATTAA	ATCCTAGGCTAAACAGGTTGAAACCGCGTCAAATTGTGCCCAAAAGGTCTCGGATCCCCGGGTTAATTAA	ATTTAATGTTAACCAGTTTGAATTTTTCTTTTCTGGGGTAATCGAATTCAGAATTCGAGCTCGTTTAAAC	0		0		0
YBR157C	ICS2	2	553637	554404	-	CACCACCTTCGTTATTACTTCACTGAAGTTTCCCTTTCCAGCAAGATATG	AAACTGGAGACATATTGCAACCACTAATTGACTTAGATATTGACAATAAA	ATTTATCAAAACAAACGAAAAAAAAAAATGCGAGACAAATGATCCAGTCA	CACCACCTTCGTTATTACTTCACTGAAGTTTCCCTTTCCAGCAAGATATGCGGATCCCCGGGTTAATTAA	AAACTGGAGACATATTGCAACCACTAATTGACTTAGATATTGACAATAAACGGATCCCCGGGTTAATTAA	ATTTATCAAAACAAACGAAAAAAAAAAATGCGAGACAAATGATCCAGTCAGAATTCGAGCTCGTTTAAAC	0		0		0
YBR158W	AMN1,CST13,ICS4	2	556643	558292	+	TTTGATAATTTATCATTTTCCTTTTCTGTTAGTAAAGTACCCATTAAATG	ATATGACAGCTTGGGTTAATGCAGACGACGAAATAGAGAATAATGTGGAC	CTGGTGGTCTGTTGTGTACTATTTATAGGTAAAGTCACAAAAACCATCTA	TTTGATAATTTATCATTTTCCTTTTCTGTTAGTAAAGTACCCATTAAATGCGGATCCCCGGGTTAATTAA	ATATGACAGCTTGGGTTAATGCAGACGACGAAATAGAGAATAATGTGGACCGGATCCCCGGGTTAATTAA	CTGGTGGTCTGTTGTGTACTATTTATAGGTAAAGTCACAAAAACCATCTAGAATTCGAGCTCGTTTAAAC	0		0		0
YBR159W	IFA38	2	558779	559822	+	AAGAACAGTCTTCAAAGCAATCAATTCGTGTCGGTGCAGCTTAAGAAATG	CTATCAGAATTAGAGCCTTAAAAAAAGCCGCAAGACAGGTTAAAAAGGAA	TATATATATATATGTATTGTATAAAAACTATCTCGAGAACGATAATTCTA	AAGAACAGTCTTCAAAGCAATCAATTCGTGTCGGTGCAGCTTAAGAAATGCGGATCCCCGGGTTAATTAA	CTATCAGAATTAGAGCCTTAAAAAAAGCCGCAAGACAGGTTAAAAAGGAACGGATCCCCGGGTTAATTAA	TATATATATATATGTATTGTATAAAAACTATCTCGAGAACGATAATTCTAGAATTCGAGCTCGTTTAAAC	0		0		0
YBR160W	CDC28,SRM5,HSL5,CDK1	2	560172	561068	+	AGCTACAGTGGAAAATAGCCCAGATCAAATAGAACTATCCTTCGAACATG	ACCGGATTAGCGCCAGAAGAGCAGCCATCCACCCCTACTTCCAAGAATCA	ACAGTGCAGTAGCATTTGTAATATAATAGCGAAATAGATTATAATGCTTA	AGCTACAGTGGAAAATAGCCCAGATCAAATAGAACTATCCTTCGAACATGCGGATCCCCGGGTTAATTAA	ACCGGATTAGCGCCAGAAGAGCAGCCATCCACCCCTACTTCCAAGAATCACGGATCCCCGGGTTAATTAA	ACAGTGCAGTAGCATTTGTAATATAATAGCGAAATAGATTATAATGCTTAGAATTCGAGCTCGTTTAAAC	0		0		0
YBR161W	CSH1	2	561728	562858	+	ACCTTACAACAGTGCTAAAGTAGTTACAGTAAACCAATTAATACGTGATG	GCGTTTTCCTTGATATAGAAAAGAATCACGCAAAATTTACCGACTTAACC	TTTATCCATGCTCACAATATTATAGGGGTAGAACAGTGGCAATTCAATCA	ACCTTACAACAGTGCTAAAGTAGTTACAGTAAACCAATTAATACGTGATGCGGATCCCCGGGTTAATTAA	GCGTTTTCCTTGATATAGAAAAGAATCACGCAAAATTTACCGACTTAACCCGGATCCCCGGGTTAATTAA	TTTATCCATGCTCACAATATTATAGGGGTAGAACAGTGGCAATTCAATCAGAATTCGAGCTCGTTTAAAC	0		0		0
YBR162C	TOS1	2	563297	564664	-	TACACCCCATAAAATATCTAAAACCTAACGGAATTTGAACGAAAAAAATG	ATGTCGTTGACCAATGGTTGAGCAAGTCCGGTTCTTCTGCGGCCTTGCCA	ATAAATGAAAAAAAGGAAAATTTTATTGGTTAATAAGAAACGATCGACTA	TACACCCCATAAAATATCTAAAACCTAACGGAATTTGAACGAAAAAAATGCGGATCCCCGGGTTAATTAA	ATGTCGTTGACCAATGGTTGAGCAAGTCCGGTTCTTCTGCGGCCTTGCCACGGATCCCCGGGTTAATTAA	ATAAATGAAAAAAAGGAAAATTTTATTGGTTAATAAGAAACGATCGACTAGAATTCGAGCTCGTTTAAAC	0		0		0
YBR162W-A	YSY6	2	565325	565522	+	AAATAGCAGGGTGCAGAGGTCGAAGTAGATAGAGGACAACACCTGCGATG	TGTTTCTTCTCGTAGGTGGTGGTGTTTTGCAACTAATCAGCTATATCCTA	ACGTACTTGCTTCCACTGTACACTTATATATGCAATTTGCCACTGCTTCA	AAATAGCAGGGTGCAGAGGTCGAAGTAGATAGAGGACAACACCTGCGATGCGGATCCCCGGGTTAATTAA	TGTTTCTTCTCGTAGGTGGTGGTGTTTTGCAACTAATCAGCTATATCCTACGGATCCCCGGGTTAATTAA	ACGTACTTGCTTCCACTGTACACTTATATATGCAATTTGCCACTGCTTCAGAATTCGAGCTCGTTTAAAC	0		0		0
YBR163W	DEM1	2	565817	567574	+	TCTTAATTTTTCAAGTAGGCTTTCTGCTTTTCTTCTGTACTTATCGTATG	TTGATCTAGGGAAAGAATTAAAAAAAATTATTCTTGAATCAAGTATGAAG	ACAACACCCTTTTAATAACTAGAATAAATAATGTTACAATACCTACACTA	TCTTAATTTTTCAAGTAGGCTTTCTGCTTTTCTTCTGTACTTATCGTATGCGGATCCCCGGGTTAATTAA	TTGATCTAGGGAAAGAATTAAAAAAAATTATTCTTGAATCAAGTATGAAGCGGATCCCCGGGTTAATTAA	ACAACACCCTTTTAATAACTAGAATAAATAATGTTACAATACCTACACTAGAATTCGAGCTCGTTTAAAC	0		0		0
YBR164C	ARL1,DLP2	2	567969	568520	-	AGAAAGATCTAAGAAGAAAGTTCCAGTAAAGTGAGTTATAGATCAAGATG	TTACCGAAGGTTTAGATTGGTTGATTGATGTTATAAAAGAGGAACAGTTA	CATTTAAAAAGTATGCATCTACACTTTTTTTTTGCAAATCTTTATCGCTA	AGAAAGATCTAAGAAGAAAGTTCCAGTAAAGTGAGTTATAGATCAAGATGCGGATCCCCGGGTTAATTAA	TTACCGAAGGTTTAGATTGGTTGATTGATGTTATAAAAGAGGAACAGTTACGGATCCCCGGGTTAATTAA	CATTTAAAAAGTATGCATCTACACTTTTTTTTTGCAAATCTTTATCGCTAGAATTCGAGCTCGTTTAAAC	0		0		0
YBR165W	UBS1	2	568946	569779	+	AAGAGCTAAACAGATTTTTTTATATTTTAATCAAAAAGCTAATAATTATG	AAACGAACGATAATCGCGGTAGTGAGCATTACACAAAGAGGAAAAAAATC	GTGAAAAAAGGAAGAAAGTTCTACTATTCTATGTAAAAATAAACCCATTA	AAGAGCTAAACAGATTTTTTTATATTTTAATCAAAAAGCTAATAATTATGCGGATCCCCGGGTTAATTAA	AAACGAACGATAATCGCGGTAGTGAGCATTACACAAAGAGGAAAAAAATCCGGATCCCCGGGTTAATTAA	GTGAAAAAAGGAAGAAAGTTCTACTATTCTATGTAAAAATAAACCCATTAGAATTCGAGCTCGTTTAAAC	0		0		0
YBR166C	TYR1	2	569936	571294	-	TACCGTAGCACTTGAAGGAAAGAGGACAGCATATCCACTTGATAAACATG	CCATTCTGAGTCATTCTAGTGACCGTTCGGCCGCTGAAAAAAGAAATACA	TTTCACAAAAGAAGGCCTAATATTATAGGAAATCAGCATTAAAAACATTA	TACCGTAGCACTTGAAGGAAAGAGGACAGCATATCCACTTGATAAACATGCGGATCCCCGGGTTAATTAA	CCATTCTGAGTCATTCTAGTGACCGTTCGGCCGCTGAAAAAAGAAATACACGGATCCCCGGGTTAATTAA	TTTCACAAAAGAAGGCCTAATATTATAGGAAATCAGCATTAAAAACATTAGAATTCGAGCTCGTTTAAAC	0		0		0
YBR167C	POP7,RPP2	2	571562	571984	-	GCAATAAGATTGACGGTCAAAGAAGAAAAGAGAACTCTGCACCCAGGATG	CCCAACTAAAGAAAAGGGCTGTAAGCGGTGTAGAATTGCGTATTTATGTT	AGCTATAAATAGTATACAATAACAATGAGCGCTAAAAGTATGACATATTA	GCAATAAGATTGACGGTCAAAGAAGAAAAGAGAACTCTGCACCCAGGATGCGGATCCCCGGGTTAATTAA	CCCAACTAAAGAAAAGGGCTGTAAGCGGTGTAGAATTGCGTATTTATGTTCGGATCCCCGGGTTAATTAA	AGCTATAAATAGTATACAATAACAATGAGCGCTAAAAGTATGACATATTAGAATTCGAGCTCGTTTAAAC	0		0		0
YBR168W	PEX32	2	572465	573706	+	CTTAATTTAGTTCAGTGGACATCATTTTGCTAATTTCAAGGAAAGAAATG	TGGAAAGTTTTACCAGGTCAAGAAAATGGAAACGACGCCTCTTCCATTTG	TTAGGCAACCAACTATATATGCAGTTTAGAGGCTTAAAGCAATACTATTA	CTTAATTTAGTTCAGTGGACATCATTTTGCTAATTTCAAGGAAAGAAATGCGGATCCCCGGGTTAATTAA	TGGAAAGTTTTACCAGGTCAAGAAAATGGAAACGACGCCTCTTCCATTTGCGGATCCCCGGGTTAATTAA	TTAGGCAACCAACTATATATGCAGTTTAGAGGCTTAAAGCAATACTATTAGAATTCGAGCTCGTTTAAAC	0		0		0
YBR169C	SSE2	2	574009	576090	-	TTTTTTTTTTTTTACCTGTAACAGACGTAACCAAAGGATATAATATAATG	CTGCAAGTGATGATAGCGATGACAACAATGATGAAAACATGGACCTTGAT	TTAAGAAAGAATAAAGAGGGAACAATCCAAATAGACAAAAATTCCGATTA	TTTTTTTTTTTTTACCTGTAACAGACGTAACCAAAGGATATAATATAATGCGGATCCCCGGGTTAATTAA	CTGCAAGTGATGATAGCGATGACAACAATGATGAAAACATGGACCTTGATCGGATCCCCGGGTTAATTAA	TTAAGAAAGAATAAAGAGGGAACAATCCAAATAGACAAAAATTCCGATTAGAATTCGAGCTCGTTTAAAC	0		0		0
YBR170C	NPL4,HRD4	2	576438	578180	-	GAAAAATTTCCCTATACTACTGATATCGATATACATTTAAGTGAAGTATG	TCTCATCGGCTGGTTGGCAAACGTTAGTCATGATCCTTCAGGAAAGCGGC	CGCATTTCTATTTTTTTAATCTAAAACCTCAAATCTTACAGTCTCTCCTA	GAAAAATTTCCCTATACTACTGATATCGATATACATTTAAGTGAAGTATGCGGATCCCCGGGTTAATTAA	TCTCATCGGCTGGTTGGCAAACGTTAGTCATGATCCTTCAGGAAAGCGGCCGGATCCCCGGGTTAATTAA	CGCATTTCTATTTTTTTAATCTAAAACCTCAAATCTTACAGTCTCTCCTAGAATTCGAGCTCGTTTAAAC	0		0		0
YBR171W	SEC66,SEC71,HSS1	2	578458	579078	+	ATTCAAGTACAGGAAAGAGGTACGCACAACTACTTGAGTTTGCCAATATG	GTATTAAAGAGTGGGAGCTGAAAATAAATAATGATGGAAGATTAGTCAAT	AAAAAAACACTGAACGAGCGAATACATATCTTTGCACACAGTAGGCACTA	ATTCAAGTACAGGAAAGAGGTACGCACAACTACTTGAGTTTGCCAATATGCGGATCCCCGGGTTAATTAA	GTATTAAAGAGTGGGAGCTGAAAATAAATAATGATGGAAGATTAGTCAATCGGATCCCCGGGTTAATTAA	AAAAAAACACTGAACGAGCGAATACATATCTTTGCACACAGTAGGCACTAGAATTCGAGCTCGTTTAAAC	0		0		0
YBR172C	SMY2	2	579244	581466	-	TTCCTTCCTCCTCCCCTATATACTCAACTTCTCAGCCCACATCAATAATG	ACGACGGCTGGGAATTCCAAGTAGTGAGCAAGAAGAAGGGTAGAAAACAC	GATAAAGAAATATGCAGTGAAAAGAAAAAATTATGAAGCTTTTCCTTTCA	TTCCTTCCTCCTCCCCTATATACTCAACTTCTCAGCCCACATCAATAATGCGGATCCCCGGGTTAATTAA	ACGACGGCTGGGAATTCCAAGTAGTGAGCAAGAAGAAGGGTAGAAAACACCGGATCCCCGGGTTAATTAA	GATAAAGAAATATGCAGTGAAAAGAAAAAATTATGAAGCTTTTCCTTTCAGAATTCGAGCTCGTTTAAAC	0		0		0
YBR173C	UMP1	2	581820	582266	-	GAATGAGTATTAAATAGACAAGACCAGAAACAGCCTGCATACCAACTATG	CCATGGTAGGTGATGACGTCCACAGCAAAATCGAAAAACAATTAGGCATT	TTTCAATGGTTTACGTGACAGATGTATAAAGAAATTGAGAGCAATTTTTA	GAATGAGTATTAAATAGACAAGACCAGAAACAGCCTGCATACCAACTATGCGGATCCCCGGGTTAATTAA	CCATGGTAGGTGATGACGTCCACAGCAAAATCGAAAAACAATTAGGCATTCGGATCCCCGGGTTAATTAA	TTTCAATGGTTTACGTGACAGATGTATAAAGAAATTGAGAGCAATTTTTAGAATTCGAGCTCGTTTAAAC	0		0		0
YBR174C	YBR174C	2	582432	582746	-	GCGCTGTATGGCCGATAAAAGTGTGCAGCAGCCCATAAGATAAATGAATG	ACTTGCAAATGAATGAGCCTACGCTCAAACTTTCCAATATCTACCGCCAG	GTTACCCGAGGAGTGAAAAAAGCAAGACCATAAGAAATGCTTGTGCATCA	GCGCTGTATGGCCGATAAAAGTGTGCAGCAGCCCATAAGATAAATGAATGCGGATCCCCGGGTTAATTAA	ACTTGCAAATGAATGAGCCTACGCTCAAACTTTCCAATATCTACCGCCAGCGGATCCCCGGGTTAATTAA	GTTACCCGAGGAGTGAAAAAAGCAAGACCATAAGAAATGCTTGTGCATCAGAATTCGAGCTCGTTTAAAC	1	YBR175W	1	YBR175W	0
YBR175W	SWD3,SAF35,CPS30	2	582502	583449	+	GTTTGAGCGTAGGCTCATTCATTTGCAAGTGGCCATTATATGCTAACATG	TAATGTGTTCCCTTGCATTGAATGGAGATTGCTGTTTATGGAGATGGGTT	GTGTTACACCTTAAGGGAATGTCTGTCGTGTACATAACGCAGATTCTTTA	GTTTGAGCGTAGGCTCATTCATTTGCAAGTGGCCATTATATGCTAACATGCGGATCCCCGGGTTAATTAA	TAATGTGTTCCCTTGCATTGAATGGAGATTGCTGTTTATGGAGATGGGTTCGGATCCCCGGGTTAATTAA	GTGTTACACCTTAAGGGAATGTCTGTCGTGTACATAACGCAGATTCTTTAGAATTCGAGCTCGTTTAAAC	1	YBR174C	1	YBR174C	0
YBR176W	ECM31	2	583814	584752	+	TTAATAAATTAGCTTGCCATAAAATTAGGGAAATTTTTACTCACAATATG	AAGTTAAGGAGGACTTATGGAATGAATTCCTCTCTTCAATTAACGAAAAG	AAAATTTAAAGTTTTTTTCCCTATGCAGTGATTTTTATCTATATATTTTA	TTAATAAATTAGCTTGCCATAAAATTAGGGAAATTTTTACTCACAATATGCGGATCCCCGGGTTAATTAA	AAGTTAAGGAGGACTTATGGAATGAATTCCTCTCTTCAATTAACGAAAAGCGGATCCCCGGGTTAATTAA	AAAATTTAAAGTTTTTTTCCCTATGCAGTGATTTTTATCTATATATTTTAGAATTCGAGCTCGTTTAAAC	0		0		0
YBR177C	EHT1	2	584901	586256	-	CATTGATAGTAGTTGCGTAAAAAACAAAGCTCATAAAAGTTTCCGATATG	CTACCAAGGCAATTGCAGAATTTTTCACTAAGTTTGATGAATTAGTCGTA	CAATGTTGTATAAATACATAGGAAAGTGGTTTGAAAATTGTGTGACATCA	CATTGATAGTAGTTGCGTAAAAAACAAAGCTCATAAAAGTTTCCGATATGCGGATCCCCGGGTTAATTAA	CTACCAAGGCAATTGCAGAATTTTTCACTAAGTTTGATGAATTAGTCGTACGGATCCCCGGGTTAATTAA	CAATGTTGTATAAATACATAGGAAAGTGGTTTGAAAATTGTGTGACATCAGAATTCGAGCTCGTTTAAAC	1	YBR178W	1	YBR178W	0
YBR178W	YBR178W	2	586165	586539	+	ACTCGTCAAAATCAACTTGCTCCTTGTTGTCTTTTAAATGGAGTTTAATG	GGTTTTGCAAATCATTAAGCAGATACACAAGGGTCCTTTTAATGTTTATG	TTATTTTATTCCAAGCAGGTCCATTTTTTTTTTCACTTTGCACGAAATTA	ACTCGTCAAAATCAACTTGCTCCTTGTTGTCTTTTAAATGGAGTTTAATGCGGATCCCCGGGTTAATTAA	GGTTTTGCAAATCATTAAGCAGATACACAAGGGTCCTTTTAATGTTTATGCGGATCCCCGGGTTAATTAA	TTATTTTATTCCAAGCAGGTCCATTTTTTTTTTCACTTTGCACGAAATTAGAATTCGAGCTCGTTTAAAC	1	YBR177C	1	YBR177C	0
YBR179C	FZO1	2	586641	589208	-	ATTATCTGATATCACGGATAGAGGCAAAACGGTAGGCTCATTTAACGATG	GAACCGTGGCTCAAAAATTGATGGTGGAAGAAATAAATTTAGACATCGAT	CATTATGTATATTGATTTGAAAAGACCTCATATATTTACAAGAATATCTA	ATTATCTGATATCACGGATAGAGGCAAAACGGTAGGCTCATTTAACGATGCGGATCCCCGGGTTAATTAA	GAACCGTGGCTCAAAAATTGATGGTGGAAGAAATAAATTTAGACATCGATCGGATCCCCGGGTTAATTAA	CATTATGTATATTGATTTGAAAAGACCTCATATATTTACAAGAATATCTAGAATTCGAGCTCGTTTAAAC	0		0		0
YBR180W	DTR1	2	589835	591553	+	TAATTTTTCAAAAAAGAGTTTCAAGAGCTGGGAAAAGAATTAAGGCAATG	GTATATTATATCTTCTCATTTTTCAAAGAAAATATACTGCCAAAGAATTT	AATAAAATTCTAAAAGTTAAATTTTATAGCTAAACATAAACTATTTCTTA	TAATTTTTCAAAAAAGAGTTTCAAGAGCTGGGAAAAGAATTAAGGCAATGCGGATCCCCGGGTTAATTAA	GTATATTATATCTTCTCATTTTTCAAAGAAAATATACTGCCAAAGAATTTCGGATCCCCGGGTTAATTAA	AATAAAATTCTAAAAGTTAAATTTTATAGCTAAACATAAACTATTTCTTAGAATTCGAGCTCGTTTAAAC	0		0		0
YBR181C	RPS6B,RPS102,RPS101,LPG18	2	591806	592868	-	AAGTCATTAATTGAAACTATCCAGTGTGAATAGACGACTGAGCCATCATG	AGGCTGAAAAGGCCGAAATCAGAAAGAGAAGAGCTTCTTCTTTGAAGGCT	ATATCTAAAAGGAAAAAGTATAAAAATTATGCAGGTCCAAGACATACTTA	AAGTCATTAATTGAAACTATCCAGTGTGAATAGACGACTGAGCCATCATGCGGATCCCCGGGTTAATTAA	AGGCTGAAAAGGCCGAAATCAGAAAGAGAAGAGCTTCTTCTTTGAAGGCTCGGATCCCCGGGTTAATTAA	ATATCTAAAAGGAAAAAGTATAAAAATTATGCAGGTCCAAGACATACTTAGAATTCGAGCTCGTTTAAAC	0		0		0
YBR182C	SMP1	2	593600	594958	-	AGCTCTAGATAAGCAAACACAATTATTTTCAAAAAAATTTCTGCTAAATG	CGGTAGCTAGTTCAACTTTGAAATCCACGAGTTCGACAAACTCTCCAGAT	TTAAGCGAATGCTTTCTTGTAGTAAAAAGTAGCTAGAAAGCGATTCATTA	AGCTCTAGATAAGCAAACACAATTATTTTCAAAAAAATTTCTGCTAAATGCGGATCCCCGGGTTAATTAA	CGGTAGCTAGTTCAACTTTGAAATCCACGAGTTCGACAAACTCTCCAGATCGGATCCCCGGGTTAATTAA	TTAAGCGAATGCTTTCTTGTAGTAAAAAGTAGCTAGAAAGCGATTCATTAGAATTCGAGCTCGTTTAAAC	0		0		0
YBR182C-A	YBR182C-A	2	595455	595649	-	AGGTTAATGGTTGGCGATACTAACTAAAAAGAATTTGTAGAAATGCCATG	AGCTTGCTCTTAAGCTGTCAAAGAAAACTAGTGGCACTCACACTACGCAC	AATTTACGTAAGCGTTAATGGAAAACAATAACGATGTGGTGTAAAAGCTA	AGGTTAATGGTTGGCGATACTAACTAAAAAGAATTTGTAGAAATGCCATGCGGATCCCCGGGTTAATTAA	AGCTTGCTCTTAAGCTGTCAAAGAAAACTAGTGGCACTCACACTACGCACCGGATCCCCGGGTTAATTAA	AATTTACGTAAGCGTTAATGGAAAACAATAACGATGTGGTGTAAAAGCTAGAATTCGAGCTCGTTTAAAC	0		0		0
YBR183W	YPC1	2	596209	597159	+	ATTTGTAAATAAAAGCAGAAATCTTTATTTAAGAAAATAGAAGATTGATG	TATTTGGCCCATACGTAGAAGATCAATCAATTGAAGTTAAAAAGGAGAAG	AAAATAAATATGCCTATACATTATGAATATATATTATGCTATAATTATTA	ATTTGTAAATAAAAGCAGAAATCTTTATTTAAGAAAATAGAAGATTGATGCGGATCCCCGGGTTAATTAA	TATTTGGCCCATACGTAGAAGATCAATCAATTGAAGTTAAAAAGGAGAAGCGGATCCCCGGGTTAATTAA	AAAATAAATATGCCTATACATTATGAATATATATTATGCTATAATTATTAGAATTCGAGCTCGTTTAAAC	0		0		0
YBR184W	YBR184W	2	597457	599028	+	AATTGTTGTAACACAAATACTAAGAAATTTGTTAGCTAATTCGGGACATG	ATGACGATTCAACGGAAAGATGGGTTAGAATGGGAGAGTTAATGCACTAT	TTTATTAAATAGTTTTTCATGAAAAAAGTTATTGAAGCATCTCCCTTTCA	AATTGTTGTAACACAAATACTAAGAAATTTGTTAGCTAATTCGGGACATGCGGATCCCCGGGTTAATTAA	ATGACGATTCAACGGAAAGATGGGTTAGAATGGGAGAGTTAATGCACTATCGGATCCCCGGGTTAATTAA	TTTATTAAATAGTTTTTCATGAAAAAAGTTATTGAAGCATCTCCCTTTCAGAATTCGAGCTCGTTTAAAC	0		0		0
YBR185C	MBA1	2	599217	600053	-	AAATTTCCATCAGAAAGCAAGCCTATCCATTCAGCTAAGCTTATGAGATG	CCATACACAGAATGAAAGTTAACGGTGATATATATCGTTTACCTCCAAGC	CTATTTACAGATGTTCCAAAACTTTTCGCATTTATATACATATTGCCTTA	AAATTTCCATCAGAAAGCAAGCCTATCCATTCAGCTAAGCTTATGAGATGCGGATCCCCGGGTTAATTAA	CCATACACAGAATGAAAGTTAACGGTGATATATATCGTTTACCTCCAAGCCGGATCCCCGGGTTAATTAA	CTATTTACAGATGTTCCAAAACTTTTCGCATTTATATACATATTGCCTTAGAATTCGAGCTCGTTTAAAC	0		0		0
YBR186W	PCH2	2	600647	602454	+	TTTCATAAAAATATTCTGATCTCAAACTGAAGACATAAAATAAGGATATG	TTGTTCTGGCATTAGCTATGTCAGCGCGGAAGCTGAGCGCAGCGCGGAAG	AGTATGAGACAAAAGAAAGAAGCGAAAAAAAGGAAAAAGCTCCTCCGTCA	TTTCATAAAAATATTCTGATCTCAAACTGAAGACATAAAATAAGGATATGCGGATCCCCGGGTTAATTAA	TTGTTCTGGCATTAGCTATGTCAGCGCGGAAGCTGAGCGCAGCGCGGAAGCGGATCCCCGGGTTAATTAA	AGTATGAGACAAAAGAAAGAAGCGAAAAAAAGGAAAAAGCTCCTCCGTCAGAATTCGAGCTCGTTTAAAC	0		0		0
YBR187W	GDT1	2	602728	603570	+	TTAGGTTCTACAAAGCAAGATACAAATACGAGGCCATCGAGTATTCAATG	TCTTCATTTTCGCCTTGATGTATATATATCAAGCATTCACAACTCAGGAT	GAAGAGAAAAAAGAGAGAATCCAAGAAGAATACGGTTACAAACCATCTCA	TTAGGTTCTACAAAGCAAGATACAAATACGAGGCCATCGAGTATTCAATGCGGATCCCCGGGTTAATTAA	TCTTCATTTTCGCCTTGATGTATATATATCAAGCATTCACAACTCAGGATCGGATCCCCGGGTTAATTAA	GAAGAGAAAAAAGAGAGAATCCAAGAAGAATACGGTTACAAACCATCTCAGAATTCGAGCTCGTTTAAAC	0		0		0
YBR188C	NTC20	2	603779	604201	-	TCTACTTTTTTACGACTTACTTGTTGCGACTACTTTTTACAACCAGTATG	TAAGGAAAAGGGTATTACAGGAACCCGACCGTGACAATGATGATAGCGGC	GCCAACCCAATGAAGTCTTGCGCACGCAATTGGTTGTAATTATCCGATCA	TCTACTTTTTTACGACTTACTTGTTGCGACTACTTTTTACAACCAGTATGCGGATCCCCGGGTTAATTAA	TAAGGAAAAGGGTATTACAGGAACCCGACCGTGACAATGATGATAGCGGCCGGATCCCCGGGTTAATTAA	GCCAACCCAATGAAGTCTTGCGCACGCAATTGGTTGTAATTATCCGATCAGAATTCGAGCTCGTTTAAAC	0		0		0
YBR189W	RPS9B,SUP46,RPS13A	2	604602	605602	+	TGCATAGACAAGAAAGAAAGCAACAAGACAACTAAGACTAAGCAACAATG	GAAAGGCTGAAGCTTCCGGTGAAGCTGCTGAAGAAGCCGAAGACGAAGAA	TGAAAAGTTATAAAATTTATTATACAGTTATGAAATCAGCGAATTATTTA	TGCATAGACAAGAAAGAAAGCAACAAGACAACTAAGACTAAGCAACAATGCGGATCCCCGGGTTAATTAA	GAAAGGCTGAAGCTTCCGGTGAAGCTGCTGAAGAAGCCGAAGACGAAGAACGGATCCCCGGGTTAATTAA	TGAAAAGTTATAAAATTTATTATACAGTTATGAAATCAGCGAATTATTTAGAATTCGAGCTCGTTTAAAC	0		0		0
YBR190W	YBR190W	2	606060	606371	+	CCTGTACATCTTCACCATCACCACACCCTTTTTTACTGGAGGCAAGGATG	TTGAACTTTGGAATAAGAGAACCAAGACAAAAATAACTAGCAACAATGGG	CATGATTCGTTCGTGCTGTAGATTCATAGGATTAAATGACATACGATTTA	CCTGTACATCTTCACCATCACCACACCCTTTTTTACTGGAGGCAAGGATGCGGATCCCCGGGTTAATTAA	TTGAACTTTGGAATAAGAGAACCAAGACAAAAATAACTAGCAACAATGGGCGGATCCCCGGGTTAATTAA	CATGATTCGTTCGTGCTGTAGATTCATAGGATTAAATGACATACGATTTAGAATTCGAGCTCGTTTAAAC	1	YBR191W	1	YBR191W	0
YBR191W	RPL21A,URP1	2	606364	607234	+	GATTGAACTTTGGAATAAGAGAACCAAGACAAAAATAACTAGCAACAATG	AAGGTAACGTTCCTCAAACTTTGGCCCCAGTTCCATACGAAACTTTCATC	CCTAAAACCTGAAAATCTTTTTCGATACAAAACCAGCATCGGGTAAATTA	GATTGAACTTTGGAATAAGAGAACCAAGACAAAAATAACTAGCAACAATGCGGATCCCCGGGTTAATTAA	AAGGTAACGTTCCTCAAACTTTGGCCCCAGTTCCATACGAAACTTTCATCCGGATCCCCGGGTTAATTAA	CCTAAAACCTGAAAATCTTTTTCGATACAAAACCAGCATCGGGTAAATTAGAATTCGAGCTCGTTTAAAC	1	YBR190W	1	YBR190W	0
YBR191W-A	YBR191W-A	2	607243	607317	+	CAAACTTTGGCCCCAGTTCCATACGAAACTTTCATCTAATTTACCCGATG	GATTTTCAGGTTTTAGGTTTTATTTTTTGTCTATTTTTAAATATATAATA	TAATCTAAATGTACAAATTATGGATATTAGACACAATTTATTTTTTATTA	CAAACTTTGGCCCCAGTTCCATACGAAACTTTCATCTAATTTACCCGATGCGGATCCCCGGGTTAATTAA	GATTTTCAGGTTTTAGGTTTTATTTTTTGTCTATTTTTAAATATATAATACGGATCCCCGGGTTAATTAA	TAATCTAAATGTACAAATTATGGATATTAGACACAATTTATTTTTTATTAGAATTCGAGCTCGTTTAAAC	0		0		0
YBR192W	RIM2,PYT1	2	607746	608879	+	ACATAGTTGACCATTCTCATATCCCATAATTTTTCAAGGAGATAAAGATG	ACAGTATAATTATGTTTGGTACATGGGAAATTGTTATAAGGCTACTATCG	GTATGTCTTGGCCCTAAAGTGAATTTAGAGTTTTTTAGATTTCAAGGCTA	ACATAGTTGACCATTCTCATATCCCATAATTTTTCAAGGAGATAAAGATGCGGATCCCCGGGTTAATTAA	ACAGTATAATTATGTTTGGTACATGGGAAATTGTTATAAGGCTACTATCGCGGATCCCCGGGTTAATTAA	GTATGTCTTGGCCCTAAAGTGAATTTAGAGTTTTTTAGATTTCAAGGCTAGAATTCGAGCTCGTTTAAAC	0		0		0
YBR193C	MED8	2	609176	609847	-	AACCCCGAGCAAGAAGAACAAAAGAAAAACATAAAGCAACGTGGAATATG	CAGGGGAAAAGCCCATTATTACGGGATCTACTTCAACATCATCTAGTAAT	CTAGTAACAATAAAATGTTTTAAAATATCAGTAGCGTGAAGTAAAATTCA	AACCCCGAGCAAGAAGAACAAAAGAAAAACATAAAGCAACGTGGAATATGCGGATCCCCGGGTTAATTAA	CAGGGGAAAAGCCCATTATTACGGGATCTACTTCAACATCATCTAGTAATCGGATCCCCGGGTTAATTAA	CTAGTAACAATAAAATGTTTTAAAATATCAGTAGCGTGAAGTAAAATTCAGAATTCGAGCTCGTTTAAAC	0		0		0
YBR194W	SOY1	2	610132	610503	+	TTTAGTTCTCGCATTCCATCATTTTATACTATATACGTTTGAGCTTAATG	CTGAAGTTCAAGCCAGACTGGGAAACCTCGAGAATATCAAAATACCAAAG	TATTGTATTTCGAAGAAAGTGGTTGCTCATTTATTACCTTTGAACTTTCA	TTTAGTTCTCGCATTCCATCATTTTATACTATATACGTTTGAGCTTAATGCGGATCCCCGGGTTAATTAA	CTGAAGTTCAAGCCAGACTGGGAAACCTCGAGAATATCAAAATACCAAAGCGGATCCCCGGGTTAATTAA	TATTGTATTTCGAAGAAAGTGGTTGCTCATTTATTACCTTTGAACTTTCAGAATTCGAGCTCGTTTAAAC	0		0		0
YBR195C	MSI1,CAC3	2	610708	611976	-	TATCAGGTCCTATTTCTGACAAACAATATACAAATTTAGTTTCAAAGATG	ATAATTCAGTTCACATATGGAAACCTGCAGGAAACCTTGTTGGACATTCG	ATAGGGACAGGAGCCATTAGCATGCCTGGCTTCAAGGAACGTTTAGGTCA	TATCAGGTCCTATTTCTGACAAACAATATACAAATTTAGTTTCAAAGATGCGGATCCCCGGGTTAATTAA	ATAATTCAGTTCACATATGGAAACCTGCAGGAAACCTTGTTGGACATTCGCGGATCCCCGGGTTAATTAA	ATAGGGACAGGAGCCATTAGCATGCCTGGCTTCAAGGAACGTTTAGGTCAGAATTCGAGCTCGTTTAAAC	0		0		0
YBR196C	PGI1,CDC30	2	612330	613994	-	CCTCTAGTCTTGCAAAATCGATTTAGAATCAAGATACCAGCCTAAAAATG	CCCACGATGCTTCTACCAACGGTTTAATCAATCAATTCAAGGAATGGATG	TAATATAGCTTTAATGTTCTTTAGGTATATATTTAAGAGCGATTTGTTCA	CCTCTAGTCTTGCAAAATCGATTTAGAATCAAGATACCAGCCTAAAAATGCGGATCCCCGGGTTAATTAA	CCCACGATGCTTCTACCAACGGTTTAATCAATCAATTCAAGGAATGGATGCGGATCCCCGGGTTAATTAA	TAATATAGCTTTAATGTTCTTTAGGTATATATTTAAGAGCGATTTGTTCAGAATTCGAGCTCGTTTAAAC	0		0		0
YBR196C-A	YBR196C-A	2	614118	614267	-	TGGTAATTTTTTGGGTTTGCAATCATCACCATCTGCACGTTGTTATAATG	TTCCCTATTTGTTTCGTCCCATTTTTCCTTTTCTCATTGTTCTCATATCT	TAAAATATTAAGTAAAAGAAAGCATTGATTATGAAGAAAGGACCTTTTTA	TGGTAATTTTTTGGGTTTGCAATCATCACCATCTGCACGTTGTTATAATGCGGATCCCCGGGTTAATTAA	TTCCCTATTTGTTTCGTCCCATTTTTCCTTTTCTCATTGTTCTCATATCTCGGATCCCCGGGTTAATTAA	TAAAATATTAAGTAAAAGAAAGCATTGATTATGAAGAAAGGACCTTTTTAGAATTCGAGCTCGTTTAAAC	0		0		0
YBR196C-B	YBR196C-B	2	614620	614724	-	CATTTCCTGGCGGCTATTTGCATCGCTATGTAAGTGGCAATGTTCGGATG	CCAAGACTATTTTATTCTCAGCACTTGTCCTACGTGGGGTTAGAGGCGAG	ATGTCCGATGGCAAAATTCTCTTTGCTTCCGCAGCGGGGCCAAAGTCTTA	CATTTCCTGGCGGCTATTTGCATCGCTATGTAAGTGGCAATGTTCGGATGCGGATCCCCGGGTTAATTAA	CCAAGACTATTTTATTCTCAGCACTTGTCCTACGTGGGGTTAGAGGCGAGCGGATCCCCGGGTTAATTAA	ATGTCCGATGGCAAAATTCTCTTTGCTTCCGCAGCGGGGCCAAAGTCTTAGAATTCGAGCTCGTTTAAAC	0		0		0
YBR197C	YBR197C	2	615297	615949	-	GAGAAATAAGATGAAATGTATGTTGCTGGCACGAACGAAGACAAATAATG	AGAAGTACGTGAGCCAAGTTGTCGATACTATTAAAGATGTTCACCGATGC	GACGGGACTTTTAGCATCCTCTAAATATTTTCAACCCATACATGTCATCA	GAGAAATAAGATGAAATGTATGTTGCTGGCACGAACGAAGACAAATAATGCGGATCCCCGGGTTAATTAA	AGAAGTACGTGAGCCAAGTTGTCGATACTATTAAAGATGTTCACCGATGCCGGATCCCCGGGTTAATTAA	GACGGGACTTTTAGCATCCTCTAAATATTTTCAACCCATACATGTCATCAGAATTCGAGCTCGTTTAAAC	0		0		0
YBR198C	TAF5,TAF90	2	616220	618616	-	AGATACGAGAAACTCCGGGTTCAAGTTGAGATACTTGAAAAATAAGAATG	TCAAGTTCAGCAGAAGCAATTTAGCCCTTGCAGGAGGTGCTTTCAGGCCA	ATACTTATTACATATCACTTCCATGCTGTTATTTTTTTCAGTGTGAATTA	AGATACGAGAAACTCCGGGTTCAAGTTGAGATACTTGAAAAATAAGAATGCGGATCCCCGGGTTAATTAA	TCAAGTTCAGCAGAAGCAATTTAGCCCTTGCAGGAGGTGCTTTCAGGCCACGGATCCCCGGGTTAATTAA	ATACTTATTACATATCACTTCCATGCTGTTATTTTTTTCAGTGTGAATTAGAATTCGAGCTCGTTTAAAC	0		0		0
YBR199W	KTR4	2	619002	620396	+	ACACAATTTTTAGTTTAGACCCAACAAGGTGAACCATACGAACTGATATG	AGGCAACCTGGATAAGACACTCTATGTCTGAGGAAGAGTTAGAAATGTAT	GATGCCGTTCTCGAAAGCAGCGGCACAAATTCTCAAAGCTAATGTCTTCA	ACACAATTTTTAGTTTAGACCCAACAAGGTGAACCATACGAACTGATATGCGGATCCCCGGGTTAATTAA	AGGCAACCTGGATAAGACACTCTATGTCTGAGGAAGAGTTAGAAATGTATCGGATCCCCGGGTTAATTAA	GATGCCGTTCTCGAAAGCAGCGGCACAAATTCTCAAAGCTAATGTCTTCAGAATTCGAGCTCGTTTAAAC	0		0		0
YBR200W	BEM1,SRO1	2	620965	622620	+	ACGTTGAAAGCACTGTGTGAAAAGAAATTGTCAAGAAAGCCATATAAATG	AAGTCAGTAACATAATCCAAGCCAAACTGAAAATTTCCGTTCACGATATT	CATCTGCCAAGTAAAGAAGAAAAATGCTTCGTCTTCTAACACTAGATTCA	ACGTTGAAAGCACTGTGTGAAAAGAAATTGTCAAGAAAGCCATATAAATGCGGATCCCCGGGTTAATTAA	AAGTCAGTAACATAATCCAAGCCAAACTGAAAATTTCCGTTCACGATATTCGGATCCCCGGGTTAATTAA	CATCTGCCAAGTAAAGAAGAAAAATGCTTCGTCTTCTAACACTAGATTCAGAATTCGAGCTCGTTTAAAC	0		0		0
YBR200W-A	YBR200W-A	2	623076	623240	+	TTCAGAAGAGACTACAAGAAAAATTCTGAACATATCTATTCTTAACTATG	ACCGCAGCCCAAAGATACTTTCTCTTTATTTTATTAGCGATAGGACAGGC	TACAATAATTTCAATTACTTTCTGCTTGATTAATAGTGATTATCATTTTA	TTCAGAAGAGACTACAAGAAAAATTCTGAACATATCTATTCTTAACTATGCGGATCCCCGGGTTAATTAA	ACCGCAGCCCAAAGATACTTTCTCTTTATTTTATTAGCGATAGGACAGGCCGGATCCCCGGGTTAATTAA	TACAATAATTTCAATTACTTTCTGCTTGATTAATAGTGATTATCATTTTAGAATTCGAGCTCGTTTAAAC	0		0		0
YBR201W	DER1	2	623669	624304	+	AGCAGAGATTTCGTCACCAACAGAAGAAAAGCTAAAGCCCAAGCAATATG	TCGATTTGTGTAAATCTCCGTACGACTGGTTCCGCAACACTGAAACACCC	CGTTCACTTTTGTTATTGGTTTTTGGTAAATAAAAACGGCCTTCCCTTTA	AGCAGAGATTTCGTCACCAACAGAAGAAAAGCTAAAGCCCAAGCAATATGCGGATCCCCGGGTTAATTAA	TCGATTTGTGTAAATCTCCGTACGACTGGTTCCGCAACACTGAAACACCCCGGATCCCCGGGTTAATTAA	CGTTCACTTTTGTTATTGGTTTTTGGTAAATAAAAACGGCCTTCCCTTTAGAATTCGAGCTCGTTTAAAC	0		0		0
YBR201C-A	YBR201C-A	2	624586	624789	-	TTTCTTTATAATATATAGGAAATATCACAAAAGATCGAGGACTAACAATG	CACACAACTACAAGGACGAATTTTGTTCTCAACGATCATACACCAGGTTT	GTCTCGGTAATTTTCTCCCTAATGATAACCCATATTTTCGAAAGACTTTA	TTTCTTTATAATATATAGGAAATATCACAAAAGATCGAGGACTAACAATGCGGATCCCCGGGTTAATTAA	CACACAACTACAAGGACGAATTTTGTTCTCAACGATCATACACCAGGTTTCGGATCCCCGGGTTAATTAA	GTCTCGGTAATTTTCTCCCTAATGATAACCCATATTTTCGAAAGACTTTAGAATTCGAGCTCGTTTAAAC	0		0		0
YBR202W	MCM7,CDC47	2	625865	628402	+	ATTAGCTTCAATCTTGCAGGAAGAACTCAATACAGACAGACCAGATTATG	CTTCCGCTAACGCGAGCGCCCAAGATTCTGATATCGATCTACAAGACGCT	AAAAAGAATAAGGAATGAAGGCCCTGTTGCTTTTTTTTTTAGAACTTTCA	ATTAGCTTCAATCTTGCAGGAAGAACTCAATACAGACAGACCAGATTATGCGGATCCCCGGGTTAATTAA	CTTCCGCTAACGCGAGCGCCCAAGATTCTGATATCGATCTACAAGACGCTCGGATCCCCGGGTTAATTAA	AAAAAGAATAAGGAATGAAGGCCCTGTTGCTTTTTTTTTTAGAACTTTCAGAATTCGAGCTCGTTTAAAC	0		0		0
YBR203W	COS111	2	629265	632039	+	AAAAGGAGAAAGGAAAAAAGGTACGCTAAACAAGGTCGAGTGTATTGATG	ATCTAAGGAGAAATGTTGGCGAAAATAACTACTATGCTGAAAGCATCATA	TGGCCAAATAAATTAACAGAACGTATGCTGTTAAAAGAGAGCAGTCGTTA	AAAAGGAGAAAGGAAAAAAGGTACGCTAAACAAGGTCGAGTGTATTGATGCGGATCCCCGGGTTAATTAA	ATCTAAGGAGAAATGTTGGCGAAAATAACTACTATGCTGAAAGCATCATACGGATCCCCGGGTTAATTAA	TGGCCAAATAAATTAACAGAACGTATGCTGTTAAAAGAGAGCAGTCGTTAGAATTCGAGCTCGTTTAAAC	0		0		0
YBR204C	YBR204C	2	632351	633478	-	CTCAACGTTAGAAGAAAGCCTTAAACCGAGAACTTTTTCTCTTGGTAATG	AATTGGTGTGTGAAAACTTTCAACGAGAGGTGATTGATAATTCCAAATTG	AGTGTGCACGAAAATCTAGTTACGCAATGTGAAATCTAGAAAACCTTCTA	CTCAACGTTAGAAGAAAGCCTTAAACCGAGAACTTTTTCTCTTGGTAATGCGGATCCCCGGGTTAATTAA	AATTGGTGTGTGAAAACTTTCAACGAGAGGTGATTGATAATTCCAAATTGCGGATCCCCGGGTTAATTAA	AGTGTGCACGAAAATCTAGTTACGCAATGTGAAATCTAGAAAACCTTCTAGAATTCGAGCTCGTTTAAAC	0		0		0
YBR205W	KTR3	2	633719	634933	+	AGGCCTCGTCTGCGGACAACAACACTATCAATATCCAGCGTGCAATTATG	GTACTAGAAAGTACTTTTCAGCAGGAAATTACAAGCTTCCACCAGGAATT	TTTTAGCACCTGTTTTGACGGAGCAGGCGCTATTTGTAGTTTGGTTTTTA	AGGCCTCGTCTGCGGACAACAACACTATCAATATCCAGCGTGCAATTATGCGGATCCCCGGGTTAATTAA	GTACTAGAAAGTACTTTTCAGCAGGAAATTACAAGCTTCCACCAGGAATTCGGATCCCCGGGTTAATTAA	TTTTAGCACCTGTTTTGACGGAGCAGGCGCTATTTGTAGTTTGGTTTTTAGAATTCGAGCTCGTTTAAAC	1	YBR206W	1	YBR206W	0
YBR206W	YBR206W	2	634698	635021	+	TGATTACTTAGACAGTTCTGGTGGATTCTTCTACGAAAGATGGGGAGATG	CAGGTGCTAAAACGTCAACATGTATCTATCTATATACACATAATTCAATG	ACCCATTTTTGAACCCAAGAAGGCACTAGAATAAAGTGAGGTGGCTACTA	TGATTACTTAGACAGTTCTGGTGGATTCTTCTACGAAAGATGGGGAGATGCGGATCCCCGGGTTAATTAA	CAGGTGCTAAAACGTCAACATGTATCTATCTATATACACATAATTCAATGCGGATCCCCGGGTTAATTAA	ACCCATTTTTGAACCCAAGAAGGCACTAGAATAAAGTGAGGTGGCTACTAGAATTCGAGCTCGTTTAAAC	1	YBR205W	1	YBR205W	0
YBR207W	FTH1	2	635243	636640	+	AACTCTAAGAATAGAGAACTAGAGTGGTATTCATATTTCTAGTCACCATG	CCAAAGATAGTTCTGTGCCCCTAATAATTGATAGCAGTGGTTCAGCGAAT	AATGTATGAAAAGAAGCTTAAAATTATTACGTGTGTTTGTTATGTTCTCA	AACTCTAAGAATAGAGAACTAGAGTGGTATTCATATTTCTAGTCACCATGCGGATCCCCGGGTTAATTAA	CCAAAGATAGTTCTGTGCCCCTAATAATTGATAGCAGTGGTTCAGCGAATCGGATCCCCGGGTTAATTAA	AATGTATGAAAAGAAGCTTAAAATTATTACGTGTGTTTGTTATGTTCTCAGAATTCGAGCTCGTTTAAAC	0		0		0
YBR208C	DUR1,2,DUR80	2	636800	642307	-	GGAATATCTTTTTTATAGTCACAATAAATTTCAGTTTTGATTAAAAAATG	GTGATATGGTTGATTCTGGTGACATAGTGGCCGTCATAGAGACATTCGCA	AGACTAAATGAGTGCTCCTTTGATTTTAGATGCCAACAAAAGGTAATTCA	GGAATATCTTTTTTATAGTCACAATAAATTTCAGTTTTGATTAAAAAATGCGGATCCCCGGGTTAATTAA	GTGATATGGTTGATTCTGGTGACATAGTGGCCGTCATAGAGACATTCGCACGGATCCCCGGGTTAATTAA	AGACTAAATGAGTGCTCCTTTGATTTTAGATGCCAACAAAAGGTAATTCAGAATTCGAGCTCGTTTAAAC	0		0		0
YBR209W	YBR209W	2	642680	642997	+	CAATGGCTTGCGCTAACTGCGAACAGAGTGCCCTATGAAATAGGGGAATG	TTAAAAAGGGTATTGCCAATACACATAGTAGCCTTATCTGCAGCAAGCCA	AACATGTTCTTTGCTTTTTTTCCCCAACGACGTCGAACACATTAGTCCTA	CAATGGCTTGCGCTAACTGCGAACAGAGTGCCCTATGAAATAGGGGAATGCGGATCCCCGGGTTAATTAA	TTAAAAAGGGTATTGCCAATACACATAGTAGCCTTATCTGCAGCAAGCCACGGATCCCCGGGTTAATTAA	AACATGTTCTTTGCTTTTTTTCCCCAACGACGTCGAACACATTAGTCCTAGAATTCGAGCTCGTTTAAAC	0		0		0
YBR210W	ERV15	2	651786	652214	+	GATAAAACTAACTGCAGGCACCAAGAAGTTCGAAGCCAAGAGTAAAGATG	TCTACAGAATGGTCACAGCGTTACTTGAAAATGATGCAAATTTGATAAGC	ACTTCATAGATATGCACAAATCTCTCTTTTTTTTCCTGTTGTCGCTATTA	GATAAAACTAACTGCAGGCACCAAGAAGTTCGAAGCCAAGAGTAAAGATGCGGATCCCCGGGTTAATTAA	TCTACAGAATGGTCACAGCGTTACTTGAAAATGATGCAAATTTGATAAGCCGGATCCCCGGGTTAATTAA	ACTTCATAGATATGCACAAATCTCTCTTTTTTTTCCTGTTGTCGCTATTAGAATTCGAGCTCGTTTAAAC	0		0		0
YBR211C	AME1,ARP100	2	652369	653343	-	TGTATTGTCTTGACTATTTGCGTGTTCATTTAAAGAAAAACCTCAGTATG	AAATAAATAAAATTAATGAAAATCTTTCTAACGAATTACAACCAAGTCTA	TATACATATATATATATATATATATATACATCTTTTGAACCAATTCCCTA	TGTATTGTCTTGACTATTTGCGTGTTCATTTAAAGAAAAACCTCAGTATGCGGATCCCCGGGTTAATTAA	AAATAAATAAAATTAATGAAAATCTTTCTAACGAATTACAACCAAGTCTACGGATCCCCGGGTTAATTAA	TATACATATATATATATATATATATATACATCTTTTGAACCAATTCCCTAGAATTCGAGCTCGTTTAAAC	0		0		0
YBR212W	NGR1,RBP1	2	654096	656108	+	TTTTTCATATCCTTCGCCATCGATTTTTGCCTGAAAAATTTACACAAATG	AGCATCCTAATAGGAACAATGTTCCGCCAATTCATCCTTCTCTTCTACAT	ATAAAACTGCGGACAAGATTGAAATTTTCTTTTTTTGTCTTTTGTAATCA	TTTTTCATATCCTTCGCCATCGATTTTTGCCTGAAAAATTTACACAAATGCGGATCCCCGGGTTAATTAA	AGCATCCTAATAGGAACAATGTTCCGCCAATTCATCCTTCTCTTCTACATCGGATCCCCGGGTTAATTAA	ATAAAACTGCGGACAAGATTGAAATTTTCTTTTTTTGTCTTTTGTAATCAGAATTCGAGCTCGTTTAAAC	0		0		0
YBR213W	MET8	2	656574	657398	+	TTGTTCATGAAGTGTGCAAAATAAGAGAGTGTATAATAGGATAAAAAATG	CCTTGCAGTTCCCTCCCAGAGAACGGTTGCTTAGCGAGTACTGCTCGTCT	CTACACAATAGAAAGGACGCGCCCCTTAAAAGAGGAGGCCCTGTCGCTCA	TTGTTCATGAAGTGTGCAAAATAAGAGAGTGTATAATAGGATAAAAAATGCGGATCCCCGGGTTAATTAA	CCTTGCAGTTCCCTCCCAGAGAACGGTTGCTTAGCGAGTACTGCTCGTCTCGGATCCCCGGGTTAATTAA	CTACACAATAGAAAGGACGCGCCCCTTAAAAGAGGAGGCCCTGTCGCTCAGAATTCGAGCTCGTTTAAAC	0		0		0
YBR214W	SDS24	2	657621	659204	+	AACTATAAACACTTATAGAACAATTACCGTTTCTTCCTTCACACAACATG	AAGAAGTGGATCCGCAATCCGCAAGAAGACAGAGAGGCAGTATCGCCATG	TTTTTTGAGGGAGAGGGAAACAGCGGGAAAAGACAACGTTGCAAGCCTCA	AACTATAAACACTTATAGAACAATTACCGTTTCTTCCTTCACACAACATGCGGATCCCCGGGTTAATTAA	AAGAAGTGGATCCGCAATCCGCAAGAAGACAGAGAGGCAGTATCGCCATGCGGATCCCCGGGTTAATTAA	TTTTTTGAGGGAGAGGGAAACAGCGGGAAAAGACAACGTTGCAAGCCTCAGAATTCGAGCTCGTTTAAAC	0		0		0
YBR215W	HPC2	2	659563	661524	+	TTAAACGAACAGCATTAACCTCCACGACCATATTCAAACGATTGGAAATG	GTTTGGAGCGTGCAAATGGTACCATGAAAAGAGGTGGTGTTAAAAATAAA	CATTTTTTATGTCGTTCAGGGATTTTGGAAAATCTCTGACACAATGCTTA	TTAAACGAACAGCATTAACCTCCACGACCATATTCAAACGATTGGAAATGCGGATCCCCGGGTTAATTAA	GTTTGGAGCGTGCAAATGGTACCATGAAAAGAGGTGGTGTTAAAAATAAACGGATCCCCGGGTTAATTAA	CATTTTTTATGTCGTTCAGGGATTTTGGAAAATCTCTGACACAATGCTTAGAATTCGAGCTCGTTTAAAC	0		0		0
YBR216C	YBP1	2	661785	663809	-	TGAAAAAGAAAATCACCCTAGACATTCAATACGATACTCAGACACTAATG	AAATTGTGGATAAAAACGAATCTCTAAATGACTATTTTACTGGTATAAAA	TATGGCATGTTCAATATCTTGGTGGAAAAATGAAATAGATAAGAACTTCA	TGAAAAAGAAAATCACCCTAGACATTCAATACGATACTCAGACACTAATGCGGATCCCCGGGTTAATTAA	AAATTGTGGATAAAAACGAATCTCTAAATGACTATTTTACTGGTATAAAACGGATCCCCGGGTTAATTAA	TATGGCATGTTCAATATCTTGGTGGAAAAATGAAATAGATAAGAACTTCAGAATTCGAGCTCGTTTAAAC	0		0		0
YBR217W	ATG12,APG12	2	664041	664601	+	GTACATCCCTAACTGTATATTCTACAGTAGAGTGAACCAATGACAGTATG	AGACTAATGATGAGCTTATTGTAAGTTATTGTGCATCCGTAGCGTTTGGT	TGATCGACTGTAGGTTTTCTTCTTAGACCATTCCAGCGCCCGGGTATTTA	GTACATCCCTAACTGTATATTCTACAGTAGAGTGAACCAATGACAGTATGCGGATCCCCGGGTTAATTAA	AGACTAATGATGAGCTTATTGTAAGTTATTGTGCATCCGTAGCGTTTGGTCGGATCCCCGGGTTAATTAA	TGATCGACTGTAGGTTTTCTTCTTAGACCATTCCAGCGCCCGGGTATTTAGAATTCGAGCTCGTTTAAAC	0		0		0
YBR218C	PYC2	2	664916	668458	-	ACAGTTACTAGGAGAGAAAATAAGAGACATAGAGAACAAAATAAAATATG	ATTTGTTGGTTGTCCTAGAAGAAGAAACCCTACCCCCATCCCAAAAAAAG	ACAGCTAGTATTTTCAGATGTCATAAAATATAATTAACGAGTAAAAATTA	ACAGTTACTAGGAGAGAAAATAAGAGACATAGAGAACAAAATAAAATATGCGGATCCCCGGGTTAATTAA	ATTTGTTGGTTGTCCTAGAAGAAGAAACCCTACCCCCATCCCAAAAAAAGCGGATCCCCGGGTTAATTAA	ACAGCTAGTATTTTCAGATGTCATAAAATATAATTAACGAGTAAAAATTAGAATTCGAGCTCGTTTAAAC	0		0		0
YBR219C	YBR219C	2	668708	669512	-	CGGCCTTCCATACAAGAGTTGCAGACCCCGTGCTGGGTGGCACATATATG	TTACGTCTCGAGCTATTTATTATAAGAGTCAGAATTGGCGCAGGGAGTGT	AATCACAGAAACACAATAGGAAATAACCGATGGGGAGTACTTCTTACTTA	CGGCCTTCCATACAAGAGTTGCAGACCCCGTGCTGGGTGGCACATATATGCGGATCCCCGGGTTAATTAA	TTACGTCTCGAGCTATTTATTATAAGAGTCAGAATTGGCGCAGGGAGTGTCGGATCCCCGGGTTAATTAA	AATCACAGAAACACAATAGGAAATAACCGATGGGGAGTACTTCTTACTTAGAATTCGAGCTCGTTTAAAC	1	YBR220C	1	YBR220C	0
YBR220C	YBR220C	2	669204	670886	-	AGCAGTATAAAATACCATAGTTATAGGGGGATAAAACAAAAGTAGGCATG	GGAAAATCCTCCATTTACAAAGTCTGCCAATCAGTTCCTGGAGATGTACG	AAAATTTTCTTGAACGTAATGTCGTACAATTCTTGTTTGAGGGGTCGTTA	AGCAGTATAAAATACCATAGTTATAGGGGGATAAAACAAAAGTAGGCATGCGGATCCCCGGGTTAATTAA	GGAAAATCCTCCATTTACAAAGTCTGCCAATCAGTTCCTGGAGATGTACGCGGATCCCCGGGTTAATTAA	AAAATTTTCTTGAACGTAATGTCGTACAATTCTTGTTTGAGGGGTCGTTAGAATTCGAGCTCGTTTAAAC	1	YBR219C	1	YBR219C	0
YBR221C	PDB1	2	671362	672462	-	ATCGCAGTTTAGTAAGTTCTTTTACTTTTGCAATAATTTTGTTCAACATG	CTGATACTCCAACCATCGTTAAAGCTGTCAAAGAAGTCTTGTCAATTGAA	GTTCCCTATCTCCTTCTTTCTCTCCTTCCTATTGGATTGAAGTTTATTTA	ATCGCAGTTTAGTAAGTTCTTTTACTTTTGCAATAATTTTGTTCAACATGCGGATCCCCGGGTTAATTAA	CTGATACTCCAACCATCGTTAAAGCTGTCAAAGAAGTCTTGTCAATTGAACGGATCCCCGGGTTAATTAA	GTTCCCTATCTCCTTCTTTCTCTCCTTCCTATTGGATTGAAGTTTATTTAGAATTCGAGCTCGTTTAAAC	0		0		0
YBR221W-A	YBR221W-A	2	672747	672851	+	ACTTTTAATGACGGAGAACTTCTTAGTTGAAGACTCGTCTCTTTTGCATG	GAAAAAGAATCAGCTTAGGCATGATAAATACTGTGGTTTCATTAGATAGA	AAAGCTTCTATCTGGCACCCGTTTATATACGCCAATACTTATGTATTTTA	ACTTTTAATGACGGAGAACTTCTTAGTTGAAGACTCGTCTCTTTTGCATGCGGATCCCCGGGTTAATTAA	GAAAAAGAATCAGCTTAGGCATGATAAATACTGTGGTTTCATTAGATAGACGGATCCCCGGGTTAATTAA	AAAGCTTCTATCTGGCACCCGTTTATATACGCCAATACTTATGTATTTTAGAATTCGAGCTCGTTTAAAC	0		0		0
YBR222C	PCS60,FAT2	2	672929	674560	-	CCACTGTGCTGCAAGAGGTTAGACGCTTCACGCACATTTTTGCTACAATG	GAGTTATCGCAGAAACTTTTGCTAAGAGCAGCAGAAATAAGAGTAAGTTG	TGCCAGATAGAAGCTTTCAGAGAGCATAAAATTGTGCAGGATACTGCCTA	CCACTGTGCTGCAAGAGGTTAGACGCTTCACGCACATTTTTGCTACAATGCGGATCCCCGGGTTAATTAA	GAGTTATCGCAGAAACTTTTGCTAAGAGCAGCAGAAATAAGAGTAAGTTGCGGATCCCCGGGTTAATTAA	TGCCAGATAGAAGCTTTCAGAGAGCATAAAATTGTGCAGGATACTGCCTAGAATTCGAGCTCGTTTAAAC	0		0		0
YBR223C	TDP1	2	674872	676506	-	GTGAGCCCAGACAAGAATGATGATAATGTGTTTCCAACCGATTATTAATG	ACGACTTAGCTGAGGACGAGTGCTTTTGCCTTGCTCGTCATGAGAACGAC	CCCATATAGTGATGCCTAAGTGGACAGCAACATCACGCTCTTACTTGTTA	GTGAGCCCAGACAAGAATGATGATAATGTGTTTCCAACCGATTATTAATGCGGATCCCCGGGTTAATTAA	ACGACTTAGCTGAGGACGAGTGCTTTTGCCTTGCTCGTCATGAGAACGACCGGATCCCCGGGTTAATTAA	CCCATATAGTGATGCCTAAGTGGACAGCAACATCACGCTCTTACTTGTTAGAATTCGAGCTCGTTTAAAC	2	YBR223W-A;YBR224W	2	YBR223W-A;YBR224W	0
YBR223W-A	YBR223W-A	2	674930	675049	+	CATGACGAGCAAGGCAAAAGCACTCGTCCTCAGCTAAGTCGTATGGTATG	TAAAAGTACGGCACGTGACCTTCCTGGTATTTGCTAACCTGCGACTATGG	TGGGGCACCGTTTCAAGAAAGCCACGCAATTATGAAGCAGGAGTGCTTTA	CATGACGAGCAAGGCAAAAGCACTCGTCCTCAGCTAAGTCGTATGGTATGCGGATCCCCGGGTTAATTAA	TAAAAGTACGGCACGTGACCTTCCTGGTATTTGCTAACCTGCGACTATGGCGGATCCCCGGGTTAATTAA	TGGGGCACCGTTTCAAGAAAGCCACGCAATTATGAAGCAGGAGTGCTTTAGAATTCGAGCTCGTTTAAAC	1	YBR223C	1	YBR223C	0
YBR224W	YBR224W	2	676334	676849	+	TTGTTCCTATTCTCTCACTCAAATCTTGTTCCTGATTAGTCAAATCAATG	TCATTTATCCACTTTTTATAAACTGCTCAAGTAAATACAATGGGCTCCAA	TACTGGTTAACCCCCTATCATTCTTACTATCAATGTTTTTTGCTTCCTTA	TTGTTCCTATTCTCTCACTCAAATCTTGTTCCTGATTAGTCAAATCAATGCGGATCCCCGGGTTAATTAA	TCATTTATCCACTTTTTATAAACTGCTCAAGTAAATACAATGGGCTCCAACGGATCCCCGGGTTAATTAA	TACTGGTTAACCCCCTATCATTCTTACTATCAATGTTTTTTGCTTCCTTAGAATTCGAGCTCGTTTAAAC	2	YBR223C;YBR225W	2	YBR223C;YBR225W	0
YBR225W	YBR225W	2	676836	679538	+	TTTTCCCCTCATTTATCCACTTTTTATAAACTGCTCAAGTAAATACAATG	TTAGAACTTTGTATGTGGTGGCGCAAAAGCCAAAACTGCCATATACCAAA	GAAGTAATTCTTGAACAATTTAAAAAAAAATTGGAACGGCGGCACAATTA	TTTTCCCCTCATTTATCCACTTTTTATAAACTGCTCAAGTAAATACAATGCGGATCCCCGGGTTAATTAA	TTAGAACTTTGTATGTGGTGGCGCAAAAGCCAAAACTGCCATATACCAAACGGATCCCCGGGTTAATTAA	GAAGTAATTCTTGAACAATTTAAAAAAAAATTGGAACGGCGGCACAATTAGAATTCGAGCTCGTTTAAAC	2	YBR224W;YBR226C	2	YBR224W;YBR226C	0
YBR226C	YBR226C	2	679364	679774	-	ACATTCATACCCCAACAATTCCCAAGAGAAGCTTAACATAAAAAAAAATG	CGGTATCCTTTGGAGGACAACTACTATCTGGTAGTTGCCTCCTTAACATG	ACAGATATGGGCTTTTTGAATGAATTTAATTCTTTAGATATGTGGGACTA	ACATTCATACCCCAACAATTCCCAAGAGAAGCTTAACATAAAAAAAAATGCGGATCCCCGGGTTAATTAA	CGGTATCCTTTGGAGGACAACTACTATCTGGTAGTTGCCTCCTTAACATGCGGATCCCCGGGTTAATTAA	ACAGATATGGGCTTTTTGAATGAATTTAATTCTTTAGATATGTGGGACTAGAATTCGAGCTCGTTTAAAC	1	YBR225W	1	YBR225W	0
YBR227C	MCX1	2	679781	681343	-	CAAACAAAACCATAGAAGACAAGGCACTCTAATTACATTTCACACTCATG	GTCATTCTGCTAACATTCATACCCCAACAATTCCCAAGAGAAGCTTAACA	ACATTTATTACATCTATATTTATATATTCTATACCATTCATTTTTTTTTA	CAAACAAAACCATAGAAGACAAGGCACTCTAATTACATTTCACACTCATGCGGATCCCCGGGTTAATTAA	GTCATTCTGCTAACATTCATACCCCAACAATTCCCAAGAGAAGCTTAACACGGATCCCCGGGTTAATTAA	ACATTTATTACATCTATATTTATATATTCTATACCATTCATTTTTTTTTAGAATTCGAGCTCGTTTAAAC	0		0		0
YBR228W	SLX1	2	681522	682436	+	TAATGTTCTCTTTTTTCAAAAAATATTAAAAAGATAAGAAAGGTACCATG	GGACGACCCTAGTCAAGTTTTCGACAAGAATGAAGTTAGCTCACGGGAAG	ATAACCATTATCTATAGAAAAAAAAGAACCGAAAATTGTGTCAGGCCCTA	TAATGTTCTCTTTTTTCAAAAAATATTAAAAAGATAAGAAAGGTACCATGCGGATCCCCGGGTTAATTAA	GGACGACCCTAGTCAAGTTTTCGACAAGAATGAAGTTAGCTCACGGGAAGCGGATCCCCGGGTTAATTAA	ATAACCATTATCTATAGAAAAAAAAGAACCGAAAATTGTGTCAGGCCCTAGAATTCGAGCTCGTTTAAAC	0		0		0
YBR229C	ROT2,GLS2	2	682566	685430	-	TGCTCTGCGTATCTTAAAATAGCGGTCTCGAATCAACCGTATGCAACATG	CCATTCTTAACCTATCGCTTGACATAACTGAAGATTGGGAAGTTATTTTT	TAAGAAAGAGCTAAAAAGATGTAAAGATATCCCTTCGTTTTTTTCCCTCA	TGCTCTGCGTATCTTAAAATAGCGGTCTCGAATCAACCGTATGCAACATGCGGATCCCCGGGTTAATTAA	CCATTCTTAACCTATCGCTTGACATAACTGAAGATTGGGAAGTTATTTTTCGGATCCCCGGGTTAATTAA	TAAGAAAGAGCTAAAAAGATGTAAAGATATCCCTTCGTTTTTTTCCCTCAGAATTCGAGCTCGTTTAAAC	0		0		0
YBR230C	OM14	2	685758	686259	-	TATTCCAACAATTAGAAACATAACATCTACCTCCAGCATCTCATAATATG	CGCTGGACGGTATAATTTCAAAGAAATACTACTCCAGATACGACAAGAAA	GTGTGAGTGTGTGAGTGTGTGAAAGGACGTTATTAAATAGTATGTTATTA	TATTCCAACAATTAGAAACATAACATCTACCTCCAGCATCTCATAATATGCGGATCCCCGGGTTAATTAA	CGCTGGACGGTATAATTTCAAAGAAATACTACTCCAGATACGACAAGAAACGGATCCCCGGGTTAATTAA	GTGTGAGTGTGTGAGTGTGTGAAAGGACGTTATTAAATAGTATGTTATTAGAATTCGAGCTCGTTTAAAC	0		0		0
YBR230W-A	YBR230W-A	2	686569	686769	+	TAAGCAACAAAGGAAAAGGAAACAAGTAAAAAAAAAAAGAGACTAGCATG	AAGCAGCTAAGGCCCTATCACAACGGGTCAAGAAAGAGTACGCCGCCAAT	CACGCAACCAAATATGTAAGTATATAAAATATATGTATGTGTGTGCACTA	TAAGCAACAAAGGAAAAGGAAACAAGTAAAAAAAAAAAGAGACTAGCATGCGGATCCCCGGGTTAATTAA	AAGCAGCTAAGGCCCTATCACAACGGGTCAAGAAAGAGTACGCCGCCAATCGGATCCCCGGGTTAATTAA	CACGCAACCAAATATGTAAGTATATAAAATATATGTATGTGTGTGCACTAGAATTCGAGCTCGTTTAAAC	0		0		0
YBR231C	SWC5,AOR1	2	688388	689299	-	AAACTGGAATAATATTGTTTCAAGAAAGAAAACCCACTAGCCTATAAATG	TGCGCCGGCAACAACTTGCTCAGCAGTTGCAGCAGGATAACGAAGCTTCA	AAAAATTTGAGCATAAAAGCATGTTATTTAATACATGTAATATTTGTCTA	AAACTGGAATAATATTGTTTCAAGAAAGAAAACCCACTAGCCTATAAATGCGGATCCCCGGGTTAATTAA	TGCGCCGGCAACAACTTGCTCAGCAGTTGCAGCAGGATAACGAAGCTTCACGGATCCCCGGGTTAATTAA	AAAAATTTGAGCATAAAAGCATGTTATTTAATACATGTAATATTTGTCTAGAATTCGAGCTCGTTTAAAC	0		0		0
YBR232C	YBR232C	2	689582	689941	-	CCCTCACGTAAACAATTCTTTCAGGAACACCTCTGATATTATTTGATATG	TTGAGCTAAAAAGTATTACAGAAAGATTATTTAATGCCGCGCTGGACGAT	CTTTTTCATATTCAAACTTATCCATAGCCACATCCACTCTAACAATTTTA	CCCTCACGTAAACAATTCTTTCAGGAACACCTCTGATATTATTTGATATGCGGATCCCCGGGTTAATTAA	TTGAGCTAAAAAGTATTACAGAAAGATTATTTAATGCCGCGCTGGACGATCGGATCCCCGGGTTAATTAA	CTTTTTCATATTCAAACTTATCCATAGCCACATCCACTCTAACAATTTTAGAATTCGAGCTCGTTTAAAC	1	YBR233W	1	YBR233W	0
YBR233W	PBP2,HEK1	2	689637	690878	+	CCAGCGCGGCATTAAATAATCTTTCTGTAATACTTTTTAGCTCAATTATG	AAATTGAAATTGATAGATCAAATGCTGAACGTAAAAGAAGGTCGCCCCTC	TTTCTGTATTTTTATTTTCTATGTGTTTTTATTGACTAGCAGTATATTTA	CCAGCGCGGCATTAAATAATCTTTCTGTAATACTTTTTAGCTCAATTATGCGGATCCCCGGGTTAATTAA	AAATTGAAATTGATAGATCAAATGCTGAACGTAAAAGAAGGTCGCCCCTCCGGATCCCCGGGTTAATTAA	TTTCTGTATTTTTATTTTCTATGTGTTTTTATTGACTAGCAGTATATTTAGAATTCGAGCTCGTTTAAAC	1	YBR232C	1	YBR232C	0
YBR233W-A	DAD3	2	691187	691471	+	AGCCAGTCAAAGTCGCTGTGAAACATACACGGCGTTGTAGTCACAGTATG	TTATCTTGCAAAGAAAGCAAGAACAGGAGTCTTTGGGTAGCAATTCTAAA	GTGCCGTAAAAAATAAAGCATCAGAATCAATTTCTTGCACCAAACCATTA	AGCCAGTCAAAGTCGCTGTGAAACATACACGGCGTTGTAGTCACAGTATGCGGATCCCCGGGTTAATTAA	TTATCTTGCAAAGAAAGCAAGAACAGGAGTCTTTGGGTAGCAATTCTAAACGGATCCCCGGGTTAATTAA	GTGCCGTAAAAAATAAAGCATCAGAATCAATTTCTTGCACCAAACCATTAGAATTCGAGCTCGTTTAAAC	0		0		0
YBR234C	ARC40	2	691647	692801	-	TAGGAAAAATAAGCCAAAGTAAACGTATATTAGTTGAGAGTCTCCTAATG	CACAAGTCTCTTCCTGTGGGTTAGACGGTAAGATCGTCATTTATACAATT	TGAGGTAGGGAATACACATAACAATATATATATATACGTATGTATATTTA	TAGGAAAAATAAGCCAAAGTAAACGTATATTAGTTGAGAGTCTCCTAATGCGGATCCCCGGGTTAATTAA	CACAAGTCTCTTCCTGTGGGTTAGACGGTAAGATCGTCATTTATACAATTCGGATCCCCGGGTTAATTAA	TGAGGTAGGGAATACACATAACAATATATATATATACGTATGTATATTTAGAATTCGAGCTCGTTTAAAC	0		0		0
YBR235W	YBR235W	2	693111	696473	+	TTTTGCCAGCCAATTCTCTTTAAGAATAGGCCTTTCTTGTAGGATTAATG	CTCCATGCATGTTAATCAATTCGCAAACCATGACAGTAACTACTGCATTA	TGTAGTAAATAAGTTCTGGGGAAATGCATAACGATATATGTGTTATTCTA	TTTTGCCAGCCAATTCTCTTTAAGAATAGGCCTTTCTTGTAGGATTAATGCGGATCCCCGGGTTAATTAA	CTCCATGCATGTTAATCAATTCGCAAACCATGACAGTAACTACTGCATTACGGATCCCCGGGTTAATTAA	TGTAGTAAATAAGTTCTGGGGAAATGCATAACGATATATGTGTTATTCTAGAATTCGAGCTCGTTTAAAC	0		0		0
YBR236C	ABD1	2	696593	697903	-	AACTACTACAACGTGGAGTCGTCCATTATCCGTGTTAGAAAAGTAGAATG	CATTCCGTAAGGTAAAACAGTATATCGAACCGGAAAGCGTAAAGCCCAAC	AATACAGATGCTTTATAGTAGGGTTATTGTTTCTATTCATTTTTATTTCA	AACTACTACAACGTGGAGTCGTCCATTATCCGTGTTAGAAAAGTAGAATGCGGATCCCCGGGTTAATTAA	CATTCCGTAAGGTAAAACAGTATATCGAACCGGAAAGCGTAAAGCCCAACCGGATCCCCGGGTTAATTAA	AATACAGATGCTTTATAGTAGGGTTATTGTTTCTATTCATTTTTATTTCAGAATTCGAGCTCGTTTAAAC	0		0		0
YBR237W	PRP5,RNA5	2	698179	700728	+	TTCGAGAAGGGAAATTATAACGCTGTTGTCTTGGGTTTATTTGAGGTATG	AAGAGGGGGTCGTAAAGGCTGCAAGCTTGTCTTTGAAGAGTACTAAGTAC	CTAACTACGAAAGTATATAGCACCACGAGTGAGTTAAATTCTAAAAACTA	TTCGAGAAGGGAAATTATAACGCTGTTGTCTTGGGTTTATTTGAGGTATGCGGATCCCCGGGTTAATTAA	AAGAGGGGGTCGTAAAGGCTGCAAGCTTGTCTTTGAAGAGTACTAAGTACCGGATCCCCGGGTTAATTAA	CTAACTACGAAAGTATATAGCACCACGAGTGAGTTAAATTCTAAAAACTAGAATTCGAGCTCGTTTAAAC	0		0		0
YBR238C	YBR238C	2	701319	703514	-	TGATATTTCTTACTCTAATTGCTTTTCTATCTTGCAAATCTGATCCTATG	TTAACGATATTCCTATTCCTGAATTACATAATTTGAAGCCAACGTGTGTT	TTTTTTGTTCTGTAGAGAAAGAAGGTGAAAAGTGAAGGATATTAACTTTA	TGATATTTCTTACTCTAATTGCTTTTCTATCTTGCAAATCTGATCCTATGCGGATCCCCGGGTTAATTAA	TTAACGATATTCCTATTCCTGAATTACATAATTTGAAGCCAACGTGTGTTCGGATCCCCGGGTTAATTAA	TTTTTTGTTCTGTAGAGAAAGAAGGTGAAAAGTGAAGGATATTAACTTTAGAATTCGAGCTCGTTTAAAC	0		0		0
YBR239C	YBR239C	2	704563	706152	-	CAGACACACGAAGGTATAAAAATAAAATACATTGATGAATCATCGTGATG	TCTCTGGTTTGCCCCTCATGATCTTGGGTAACTTCATGCCCATACTCAAT	GTATTATATAATACGAGGTAGTAAAATGAGAAAAAAAGAAAAAAAAGTCA	CAGACACACGAAGGTATAAAAATAAAATACATTGATGAATCATCGTGATGCGGATCCCCGGGTTAATTAA	TCTCTGGTTTGCCCCTCATGATCTTGGGTAACTTCATGCCCATACTCAATCGGATCCCCGGGTTAATTAA	GTATTATATAATACGAGGTAGTAAAATGAGAAAAAAAGAAAAAAAAGTCAGAATTCGAGCTCGTTTAAAC	0		0		0
YBR240C	THI2,PHO6	2	706711	708063	-	TCACCACGTATATATATAGCCTATATATATATCCGCACTAGAACCAAATG	AACTGAAGTGTAATCAACAATTTTACAAGGATGTATATGCCATGCAGGAC	TTTGGCTTTTTTTTTCTTGAAATGAGTGAAGGGAAGGCTCAATAAGCCTA	TCACCACGTATATATATAGCCTATATATATATCCGCACTAGAACCAAATGCGGATCCCCGGGTTAATTAA	AACTGAAGTGTAATCAACAATTTTACAAGGATGTATATGCCATGCAGGACCGGATCCCCGGGTTAATTAA	TTTGGCTTTTTTTTTCTTGAAATGAGTGAAGGGAAGGCTCAATAAGCCTAGAATTCGAGCTCGTTTAAAC	0		0		0
YBR241C	YBR241C	2	708810	710276	-	TTGGAACAACAACAAAACACAGAGACTAAGGCATAACAAACTAAGTCATG	TACCCGAGACAAAGGGCAAGACTACATACAGCGAGGTTTGGGCTGGCTAC	GAAAGAAGTAAAAAATAGTTGCTTAGGTATATATGACTGGCTACAGATCA	TTGGAACAACAACAAAACACAGAGACTAAGGCATAACAAACTAAGTCATGCGGATCCCCGGGTTAATTAA	TACCCGAGACAAAGGGCAAGACTACATACAGCGAGGTTTGGGCTGGCTACCGGATCCCCGGGTTAATTAA	GAAAGAAGTAAAAAATAGTTGCTTAGGTATATATGACTGGCTACAGATCAGAATTCGAGCTCGTTTAAAC	0		0		0
YBR242W	YBR242W	2	710891	711607	+	TATTCTCATAAAAAACAATTGTCAAAGAAAGCCTACATAAAAAAAATATG	TCGTGCAGCGCCAAAAATACTTCGCCGATTTGACTCAATCGATAACTAAA	GTAGTTACTTTGTACTTTTATGACGCAAAAGTTGGTATTTATGATAATTA	TATTCTCATAAAAAACAATTGTCAAAGAAAGCCTACATAAAAAAAATATGCGGATCCCCGGGTTAATTAA	TCGTGCAGCGCCAAAAATACTTCGCCGATTTGACTCAATCGATAACTAAACGGATCCCCGGGTTAATTAA	GTAGTTACTTTGTACTTTTATGACGCAAAAGTTGGTATTTATGATAATTAGAATTCGAGCTCGTTTAAAC	0		0		0
YBR243C	ALG7,TUR1	2	711668	713014	-	TTTATCAAGTAGAGCAAGGCGGAGAACGGTAACAAAAAGTAGACTATATG	ACGCTATAGGCGCTATCATCTTTGGCCACGACAACCTATGGACAGTACGT	CAACTTTTGCGTCATAAAAGTACAAAGTAACTACCAATACATAATCTTCA	TTTATCAAGTAGAGCAAGGCGGAGAACGGTAACAAAAAGTAGACTATATGCGGATCCCCGGGTTAATTAA	ACGCTATAGGCGCTATCATCTTTGGCCACGACAACCTATGGACAGTACGTCGGATCCCCGGGTTAATTAA	CAACTTTTGCGTCATAAAAGTACAAAGTAACTACCAATACATAATCTTCAGAATTCGAGCTCGTTTAAAC	0		0		0
YBR244W	GPX2,AMI1	2	713749	714237	+	CTGACCTTGACAAGAATACAATTAGCAACAAAAAGTAATAATTCAAAATG	TAACAAAACCATCGTCCTTGGACCAAGAAATCCAAAGCCTGTTAAGTAAA	TGTATTATTTATTGTTCCGGATAATTGCTTGATTATAGACAAAGATATCA	CTGACCTTGACAAGAATACAATTAGCAACAAAAAGTAATAATTCAAAATGCGGATCCCCGGGTTAATTAA	TAACAAAACCATCGTCCTTGGACCAAGAAATCCAAAGCCTGTTAAGTAAACGGATCCCCGGGTTAATTAA	TGTATTATTTATTGTTCCGGATAATTGCTTGATTATAGACAAAGATATCAGAATTCGAGCTCGTTTAAAC	0		0		0
YBR245C	ISW1,SGN2	2	714371	717760	-	ATAGCTATGCAAAAACCAGCTAGAGGTGGATGTAGAAATACCCTATTATG	GAACTGAACAGTTGGTAGCAGAGAAAATTCCGGAAAACGAAACCACTCAT	ATGGTGTAGGATATATTAAAAAAAATCGAAATATAAAAAAAGAAGGTTTA	ATAGCTATGCAAAAACCAGCTAGAGGTGGATGTAGAAATACCCTATTATGCGGATCCCCGGGTTAATTAA	GAACTGAACAGTTGGTAGCAGAGAAAATTCCGGAAAACGAAACCACTCATCGGATCCCCGGGTTAATTAA	ATGGTGTAGGATATATTAAAAAAAATCGAAATATAAAAAAAGAAGGTTTAGAATTCGAGCTCGTTTAAAC	0		0		0
YBR246W	YBR246W	2	717812	718975	+	GGGTATTTCTACATCCACCTCTAGCTGGTTTTTGCATAGCTATACATATG	TGATCGCAACATGCTCATTTTATGATAATTCCTTGCAAACATGGATAGTT	TATTAGCCTATATATTAGTCCATATATTGCAGACTGAATTTTTTTTTCTA	GGGTATTTCTACATCCACCTCTAGCTGGTTTTTGCATAGCTATACATATGCGGATCCCCGGGTTAATTAA	TGATCGCAACATGCTCATTTTATGATAATTCCTTGCAAACATGGATAGTTCGGATCCCCGGGTTAATTAA	TATTAGCCTATATATTAGTCCATATATTGCAGACTGAATTTTTTTTTCTAGAATTCGAGCTCGTTTAAAC	0		0		0
YBR247C	ENP1,MEG1	2	719225	720676	-	GTTTTAAGACTTACAGATAAAACAATATATTAGAAAGATTAACTATAATG	AGTTTGTTGATCCACAGGAAGCTAATGATGATTTAATGATTGATGTCAAT	GGAAAGACCGAGCGATATAAAATTGATGAAAAATTGATATTACAGCATCA	GTTTTAAGACTTACAGATAAAACAATATATTAGAAAGATTAACTATAATGCGGATCCCCGGGTTAATTAA	AGTTTGTTGATCCACAGGAAGCTAATGATGATTTAATGATTGATGTCAATCGGATCCCCGGGTTAATTAA	GGAAAGACCGAGCGATATAAAATTGATGAAAAATTGATATTACAGCATCAGAATTCGAGCTCGTTTAAAC	0		0		0
YBR248C	HIS7	2	721028	722686	-	GTATCCAGTTTAGGTTTTTTAATTATTTACAAGTAAAGAAAAAGAGAATG	TAAAGGAGTATTTACTAGAGCACGGATTAAAGGTTAGAATGGATGAAGAG	CGTATATAGACTGAGTCAAGATTATAAAGTATACATATCCAACCACATTA	GTATCCAGTTTAGGTTTTTTAATTATTTACAAGTAAAGAAAAAGAGAATGCGGATCCCCGGGTTAATTAA	TAAAGGAGTATTTACTAGAGCACGGATTAAAGGTTAGAATGGATGAAGAGCGGATCCCCGGGTTAATTAA	CGTATATAGACTGAGTCAAGATTATAAAGTATACATATCCAACCACATTAGAATTCGAGCTCGTTTAAAC	0		0		0
YBR249C	ARO4	2	723103	724215	-	TTATATATTTAACCGCTAAATTTAGTAAACAAAAGAATCTATCAGAAATG	TGAGGAAATTGGCTGCTGCTGTCAGACAAAGAAGAGAAGTTAACAAGAAA	AGTGGTAGAGGAAAGAATGTACGTTACATATATCATTAAAAAAACATCTA	TTATATATTTAACCGCTAAATTTAGTAAACAAAAGAATCTATCAGAAATGCGGATCCCCGGGTTAATTAA	TGAGGAAATTGGCTGCTGCTGTCAGACAAAGAAGAGAAGTTAACAAGAAACGGATCCCCGGGTTAATTAA	AGTGGTAGAGGAAAGAATGTACGTTACATATATCATTAAAAAAACATCTAGAATTCGAGCTCGTTTAAAC	0		0		0
YBR250W	SPO23	2	725254	726825	+	CTTGCAACAAAATCAGACAAATAGAATTTCCCTTTTTTGTTTGACTAATG	TACAAGATGAACCCCCACTATATTCTATGGTAGCAGGTGAGAATAGCTTA	AAAAAAAAAAGGATAAAATAGAGGCGTTGTTCTGAGGTACCGAACATTCA	CTTGCAACAAAATCAGACAAATAGAATTTCCCTTTTTTGTTTGACTAATGCGGATCCCCGGGTTAATTAA	TACAAGATGAACCCCCACTATATTCTATGGTAGCAGGTGAGAATAGCTTACGGATCCCCGGGTTAATTAA	AAAAAAAAAAGGATAAAATAGAGGCGTTGTTCTGAGGTACCGAACATTCAGAATTCGAGCTCGTTTAAAC	0		0		0
YBR251W	MRPS5	2	727611	728534	+	GACGGTAAACCATACAAGAAACAGATTTCATAGATCAATAGGTAAAGATG	TGGGTAGAGGCAAAAAGCTTGTTGATGTCAGGAAAGTTTACTATTCAAGC	CTTATGTAAAACGAGAGATAATGGTGCGTGTGTATGTACATAGTATTTCA	GACGGTAAACCATACAAGAAACAGATTTCATAGATCAATAGGTAAAGATGCGGATCCCCGGGTTAATTAA	TGGGTAGAGGCAAAAAGCTTGTTGATGTCAGGAAAGTTTACTATTCAAGCCGGATCCCCGGGTTAATTAA	CTTATGTAAAACGAGAGATAATGGTGCGTGTGTATGTACATAGTATTTCAGAATTCGAGCTCGTTTAAAC	0		0		0
YBR252W	DUT1	2	728832	729275	+	CTCGAATGAGATGTTTGCACTGATACAGCGAGCCAAAAAATAACCAAATG	CTCTGGAAGAAAGTGCAAGAGGGGCCGGTGGCTTTGGTAGCACTGGTAAC	TGATTTTATTATACATTATACAAGTGTGCCAAAGTATATACACTAAGTTA	CTCGAATGAGATGTTTGCACTGATACAGCGAGCCAAAAAATAACCAAATGCGGATCCCCGGGTTAATTAA	CTCTGGAAGAAAGTGCAAGAGGGGCCGGTGGCTTTGGTAGCACTGGTAACCGGATCCCCGGGTTAATTAA	TGATTTTATTATACATTATACAAGTGTGCCAAAGTATATACACTAAGTTAGAATTCGAGCTCGTTTAAAC	0		0		0
YBR253W	SRB6,MED22	2	729491	729856	+	ACAGATTGTGATGATAGGCATCCTGTACTCCTTTTTTTTACAAGAAAATG	AGGAATTACTGGATAACTGTATAGAAACGTTCGTGGCGGAAAAAACTACG	GTATTTTTTTTTTTTTTTTGGCCAAATAATAGATAAATACCGCCTTTTTA	ACAGATTGTGATGATAGGCATCCTGTACTCCTTTTTTTTACAAGAAAATGCGGATCCCCGGGTTAATTAA	AGGAATTACTGGATAACTGTATAGAAACGTTCGTGGCGGAAAAAACTACGCGGATCCCCGGGTTAATTAA	GTATTTTTTTTTTTTTTTTGGCCAAATAATAGATAAATACCGCCTTTTTAGAATTCGAGCTCGTTTAAAC	0		0		0
YBR254C	TRS20	2	729958	730485	-	ACTAATACGAATAGAGAATACAGAAAAAACATACAAAGCACATTGAGATG	CGGCATTCGACTCGAGGGTAAGGACATTAGCACGTAAGCATTTGTCCAAA	ATATACATATACGCCATAAAAAATCTCTGCATCTATCTTATTTCCCATTA	ACTAATACGAATAGAGAATACAGAAAAAACATACAAAGCACATTGAGATGCGGATCCCCGGGTTAATTAA	CGGCATTCGACTCGAGGGTAAGGACATTAGCACGTAAGCATTTGTCCAAACGGATCCCCGGGTTAATTAA	ATATACATATACGCCATAAAAAATCTCTGCATCTATCTTATTTCCCATTAGAATTCGAGCTCGTTTAAAC	0		0		0
YBR255W	YBR255W	2	730678	732762	+	ATATACACTTCAGCAGAGGAGGGGGAGGTACTTTAAACGGATGAAACATG	TTCGGTTCACAATTTTTTTAGTTCTAAAAATCATTAAGGCATTGCTGTGG	TATATCAGTGCAGATGGTTTATTTCTATAAATACATAGACCCGCAAATTA	ATATACACTTCAGCAGAGGAGGGGGAGGTACTTTAAACGGATGAAACATGCGGATCCCCGGGTTAATTAA	TTCGGTTCACAATTTTTTTAGTTCTAAAAATCATTAAGGCATTGCTGTGGCGGATCCCCGGGTTAATTAA	TATATCAGTGCAGATGGTTTATTTCTATAAATACATAGACCCGCAAATTAGAATTCGAGCTCGTTTAAAC	0		0		0
YBR255C-A	YBR255C-A	2	732840	733296	-	GTAACCAACCGTCCCTAAATACCAACGACACAAAAACTGCTGCTACTATG	GAGGCCTTTTTCTGGAGGATGAGAGTTTGAACTCTTCCCGGTCAACTACA	CCATCTGCACTGATATATGAATATATAAGTAGACATGAAAATAACTTTCA	GTAACCAACCGTCCCTAAATACCAACGACACAAAAACTGCTGCTACTATGCGGATCCCCGGGTTAATTAA	GAGGCCTTTTTCTGGAGGATGAGAGTTTGAACTCTTCCCGGTCAACTACACGGATCCCCGGGTTAATTAA	CCATCTGCACTGATATATGAATATATAAGTAGACATGAAAATAACTTTCAGAATTCGAGCTCGTTTAAAC	0		0		0
YBR256C	RIB5	2	733608	734324	-	CCTAACGTACATGTCAAACCAATTGGTGAGATCGTAACCATAGCACAATG	CTATGATCTCAAACATTATCGAGGAGAAGGTTAGAAACTACCTAAATAAA	CACTTCAAAAATGCGTTTATGAAACCTATTTATGACGAATTTTTTATTTA	CCTAACGTACATGTCAAACCAATTGGTGAGATCGTAACCATAGCACAATGCGGATCCCCGGGTTAATTAA	CTATGATCTCAAACATTATCGAGGAGAAGGTTAGAAACTACCTAAATAAACGGATCCCCGGGTTAATTAA	CACTTCAAAAATGCGTTTATGAAACCTATTTATGACGAATTTTTTATTTAGAATTCGAGCTCGTTTAAAC	0		0		0
YBR257W	POP4	2	735107	735946	+	AAAGACTAAAGAAAATAAGCACGATTTGGACTCCCCTATTTGTCAGAATG	GGAAGTTCAAAAGTCGTCGTTGTGATGATATGCTATATTATATACAGAAT	TGAACTCTTATGAAGAGGAAGCAAATGGAAGTACGTAATAACTCTTACTA	AAAGACTAAAGAAAATAAGCACGATTTGGACTCCCCTATTTGTCAGAATGCGGATCCCCGGGTTAATTAA	GGAAGTTCAAAAGTCGTCGTTGTGATGATATGCTATATTATATACAGAATCGGATCCCCGGGTTAATTAA	TGAACTCTTATGAAGAGGAAGCAAATGGAAGTACGTAATAACTCTTACTAGAATTCGAGCTCGTTTAAAC	0		0		0
YBR258C	SHG1,CPS15	2	735956	736384	-	AGCTGAAACACAGTATAAGAGAGTAGAGCTTATTTCAAATCCAAAAAATG	AACTTCAGGAAACACTGAACTCTTATGAAGAGGAAGCAAATGGAAGTACG	GTCGTTGTGATGATATGCTATATTATATACAGAATTAGTAAGAGTTATTA	AGCTGAAACACAGTATAAGAGAGTAGAGCTTATTTCAAATCCAAAAAATGCGGATCCCCGGGTTAATTAA	AACTTCAGGAAACACTGAACTCTTATGAAGAGGAAGCAAATGGAAGTACGCGGATCCCCGGGTTAATTAA	GTCGTTGTGATGATATGCTATATTATATACAGAATTAGTAAGAGTTATTAGAATTCGAGCTCGTTTAAAC	0		0		0
YBR259W	YBR259W	2	736609	738675	+	CAAGCGGTATATGAACTCAGTTTTAAGGTGTAGTTTATTTTATAGTCATG	ATTTTAAGTACAAAAGGGATGGACAGAAAACATCATTAATAAGGTTAATT	ATTTACTACAAAACTTGCTAAGGTCCAACTCCCTGTCTTCACGGTTGTTA	CAAGCGGTATATGAACTCAGTTTTAAGGTGTAGTTTATTTTATAGTCATGCGGATCCCCGGGTTAATTAA	ATTTTAAGTACAAAAGGGATGGACAGAAAACATCATTAATAAGGTTAATTCGGATCCCCGGGTTAATTAA	ATTTACTACAAAACTTGCTAAGGTCCAACTCCCTGTCTTCACGGTTGTTAGAATTCGAGCTCGTTTAAAC	0		0		0
YBR260C	RGD1	2	738861	740861	-	AAAAACATACAATCTCGGAAGATTAAAAGAGAAGTGATATAGACAAGATG	TGGCAATGGAAGTATTATTAGAGGTTTCAGATCAAGCTTTTGAGCCTGAA	TACAAGTGGAAATTAAAGACGGAATGAAAATATCATAAGTGCTATGTTTA	AAAAACATACAATCTCGGAAGATTAAAAGAGAAGTGATATAGACAAGATGCGGATCCCCGGGTTAATTAA	TGGCAATGGAAGTATTATTAGAGGTTTCAGATCAAGCTTTTGAGCCTGAACGGATCCCCGGGTTAATTAA	TACAAGTGGAAATTAAAGACGGAATGAAAATATCATAAGTGCTATGTTTAGAATTCGAGCTCGTTTAAAC	0		0		0
YBR261C	YBR261C	2	741054	741752	-	CATCGGTGTCAAGAGCATCTCCAAGAAAGAATACATAAACAACAACGATG	CAAGAGAATTGTACCCAGTGAGGATGTACGCACTCAAGCCCATGCCAAAC	AGCACAAGAAAAGGGGCGTATCTATATAAATCTATGCATCCTTGATCCTA	CATCGGTGTCAAGAGCATCTCCAAGAAAGAATACATAAACAACAACGATGCGGATCCCCGGGTTAATTAA	CAAGAGAATTGTACCCAGTGAGGATGTACGCACTCAAGCCCATGCCAAACCGGATCCCCGGGTTAATTAA	AGCACAAGAAAAGGGGCGTATCTATATAAATCTATGCATCCTTGATCCTAGAATTCGAGCTCGTTTAAAC	0		0		0
YBR262C	FMP51	2	741942	742262	-	GACAGAACAGACAGTGGACTAAGAACCAGCAGATAACGGAGAGAATCATG	ATGAACAGATAAGAAACTCTGTCGATTGGATCTACTCCTGGGGTAAGAAT	TTATATACATGAGGATGTTCGTTACAGTAGGAGAAATAGAAAGCTCGCTA	GACAGAACAGACAGTGGACTAAGAACCAGCAGATAACGGAGAGAATCATGCGGATCCCCGGGTTAATTAA	ATGAACAGATAAGAAACTCTGTCGATTGGATCTACTCCTGGGGTAAGAATCGGATCCCCGGGTTAATTAA	TTATATACATGAGGATGTTCGTTACAGTAGGAGAAATAGAAAGCTCGCTAGAATTCGAGCTCGTTTAAAC	0		0		0
YBR263W	SHM1,TMP3,SHMT1	2	742486	743958	+	AATCATCAAGCCGACATTTCCACATCGAGTCTCATAGTCTTTCAATCATG	CTGGCGAGATTTCCAAGTGGGTCGGTCAATACCCTGTCCCAGGTGATATC	GCTGTATATGTTAATACATAAAGTATTTGATTTTAAATCATAATTACTTA	AATCATCAAGCCGACATTTCCACATCGAGTCTCATAGTCTTTCAATCATGCGGATCCCCGGGTTAATTAA	CTGGCGAGATTTCCAAGTGGGTCGGTCAATACCCTGTCCCAGGTGATATCCGGATCCCCGGGTTAATTAA	GCTGTATATGTTAATACATAAAGTATTTGATTTTAAATCATAATTACTTAGAATTCGAGCTCGTTTAAAC	0		0		0
YBR264C	YPT10	2	743992	744591	-	AATTACTCCAGGAAATACAAGTAGCACAAAATACGGAGGAATACGATATG	GAAATATACTGGAAATAAATAAAAAAAAAAGCGGCAGTGGCTGTATATGT	CAGGTGATATCTAAGTAATTATGATTTAAAATCAAATACTTTATGTATTA	AATTACTCCAGGAAATACAAGTAGCACAAAATACGGAGGAATACGATATGCGGATCCCCGGGTTAATTAA	GAAATATACTGGAAATAAATAAAAAAAAAAGCGGCAGTGGCTGTATATGTCGGATCCCCGGGTTAATTAA	CAGGTGATATCTAAGTAATTATGATTTAAAATCAAATACTTTATGTATTAGAATTCGAGCTCGTTTAAAC	0		0		0
YBR265W	TSC10	2	744804	745766	+	AAGATTGCCTCAAGAAAAGAAGTTATCGGTATAATCTTTTGTAGGTAATG	CCTGGTATATCAGGAAATGGTTTCGTGAAAATGACGGCAAGAAGGCCAAC	AATAAAGAGAGTCACGGGGAATATCGGGAATGAGAGTGGATGTGCTCTCA	AAGATTGCCTCAAGAAAAGAAGTTATCGGTATAATCTTTTGTAGGTAATGCGGATCCCCGGGTTAATTAA	CCTGGTATATCAGGAAATGGTTTCGTGAAAATGACGGCAAGAAGGCCAACCGGATCCCCGGGTTAATTAA	AATAAAGAGAGTCACGGGGAATATCGGGAATGAGAGTGGATGTGCTCTCAGAATTCGAGCTCGTTTAAAC	0		0		0
YBR267W	REI1	2	746063	747244	+	ATGCTTCTCATTAGAAGTCAAGAAGAGAGCATATCAGTAACAATACGATG	GTGCCAAGTTCGTCAATAACCAACCACACTACAGAGACCAACTTCTGCAG	AGCAGTATATATGCGACAAAATACTAAAAAAAGTAGTGCAAAAAGAATTA	ATGCTTCTCATTAGAAGTCAAGAAGAGAGCATATCAGTAACAATACGATGCGGATCCCCGGGTTAATTAA	GTGCCAAGTTCGTCAATAACCAACCACACTACAGAGACCAACTTCTGCAGCGGATCCCCGGGTTAATTAA	AGCAGTATATATGCGACAAAATACTAAAAAAAGTAGTGCAAAAAGAATTAGAATTCGAGCTCGTTTAAAC	1	YBR266C	1	YBR266C	0
YBR266C	SLM6	2	746158	746610	-	CGACTAGATATTTCTGTTCTGGGATATAAAACCCGTGGGTCCTAAACATG	ATGTCTCAAATGATATTGGTGGCAATTGTGCAACACGTCTTTTCAAATTG	GATTCAAGCGACGAGCAGCGGGCCCACATGAAGTCCGATTGGCATCGCTA	CGACTAGATATTTCTGTTCTGGGATATAAAACCCGTGGGTCCTAAACATGCGGATCCCCGGGTTAATTAA	ATGTCTCAAATGATATTGGTGGCAATTGTGCAACACGTCTTTTCAAATTGCGGATCCCCGGGTTAATTAA	GATTCAAGCGACGAGCAGCGGGCCCACATGAAGTCCGATTGGCATCGCTAGAATTCGAGCTCGTTTAAAC	1	YBR267W	1	YBR267W	0
YBR268W	MRPL37	2	747521	747838	+	AAAGCAGTTATATCTACAGCAAAGGAAATAGCTGCTGAAGACTGAAGATG	GGAAGGCGAACAGGCAGCGAATCAAGCAAAACAATTTCTTGAGCCAACTT	ACATATTTATTTACAAGGATACCAAACTTGATCTTATTAACGGAGGCTTA	AAAGCAGTTATATCTACAGCAAAGGAAATAGCTGCTGAAGACTGAAGATGCGGATCCCCGGGTTAATTAA	GGAAGGCGAACAGGCAGCGAATCAAGCAAAACAATTTCTTGAGCCAACTTCGGATCCCCGGGTTAATTAA	ACATATTTATTTACAAGGATACCAAACTTGATCTTATTAACGGAGGCTTAGAATTCGAGCTCGTTTAAAC	0		0		0
YBR269C	FMP21	2	748382	748798	-	AACTTGCTAAAGAGTCAGAAAGAACCAAATAATAAAAAGAAGAACTAATG	ACCCGTTGAGACACGGCGATTATTCGTTTAACGGAAGAGTAACGGATTTC	TTCATCAAATAAGAATAGTATTATTAAAAATTGGCCGGACCAAATATCTA	AACTTGCTAAAGAGTCAGAAAGAACCAAATAATAAAAAGAAGAACTAATGCGGATCCCCGGGTTAATTAA	ACCCGTTGAGACACGGCGATTATTCGTTTAACGGAAGAGTAACGGATTTCCGGATCCCCGGGTTAATTAA	TTCATCAAATAAGAATAGTATTATTAAAAATTGGCCGGACCAAATATCTAGAATTCGAGCTCGTTTAAAC	0		0		0
YBR270C	BIT2	2	748983	750620	-	CAATAAGCATAAGTGGCTAGGCGAGTCTTAAACTACAGAGTCAAGCAATG	GAAACCAAAGAATTATTGGTGAACTTCTTGAGGGCATACGCATGAGTATA	CACCTATCTATATGCCACTATTGTATATTACTAAATAAAATATTTAATTA	CAATAAGCATAAGTGGCTAGGCGAGTCTTAAACTACAGAGTCAAGCAATGCGGATCCCCGGGTTAATTAA	GAAACCAAAGAATTATTGGTGAACTTCTTGAGGGCATACGCATGAGTATACGGATCCCCGGGTTAATTAA	CACCTATCTATATGCCACTATTGTATATTACTAAATAAAATATTTAATTAGAATTCGAGCTCGTTTAAAC	0		0		0
YBR271W	YBR271W	2	751074	752333	+	AGTATCTAACTCATGCAAGTTAGGAGTTCCATAGCGGATATTTCACTATG	TGGATGATTGGGGTGCCGTTAAGTATTTATATAGGCAAATCGTTCGCAAT	TATTATAAAGAAAAACTATTCGCCTAAGCGCGTTCGTTTCTTTCCCACTA	AGTATCTAACTCATGCAAGTTAGGAGTTCCATAGCGGATATTTCACTATGCGGATCCCCGGGTTAATTAA	TGGATGATTGGGGTGCCGTTAAGTATTTATATAGGCAAATCGTTCGCAATCGGATCCCCGGGTTAATTAA	TATTATAAAGAAAAACTATTCGCCTAAGCGCGTTCGTTTCTTTCCCACTAGAATTCGAGCTCGTTTAAAC	0		0		0
YBR272C	HSM3	2	752583	754025	-	AGTTTACAACTATAATCACCGCAAAAGAACTCAGCGAAACAGGAGCAATG	ACGGAAAAAATTATTCCACAGGCAGTGAAACTAAGATTGCAGATTGCAGA	CATTAAACAATCAAGGCCGCCTTTATAGTTGCGCTTATGCAACATAATCA	AGTTTACAACTATAATCACCGCAAAAGAACTCAGCGAAACAGGAGCAATGCGGATCCCCGGGTTAATTAA	ACGGAAAAAATTATTCCACAGGCAGTGAAACTAAGATTGCAGATTGCAGACGGATCCCCGGGTTAATTAA	CATTAAACAATCAAGGCCGCCTTTATAGTTGCGCTTATGCAACATAATCAGAATTCGAGCTCGTTTAAAC	0		0		0
YBR273C	UBX7,CUI3	2	754283	755593	-	GCACTTACAAAGAAGCAAGGATAGCTAAACCAAACAGCCGTAACCAAATG	TTAATGGTAATAATGTCCATTTAGAAAAGAAAAAGGACGAAGATAAAAAA	ATTCACGTCTAATACTAGTCATAAATGGAGTTGAAGCCATTAACTACTTA	GCACTTACAAAGAAGCAAGGATAGCTAAACCAAACAGCCGTAACCAAATGCGGATCCCCGGGTTAATTAA	TTAATGGTAATAATGTCCATTTAGAAAAGAAAAAGGACGAAGATAAAAAACGGATCCCCGGGTTAATTAA	ATTCACGTCTAATACTAGTCATAAATGGAGTTGAAGCCATTAACTACTTAGAATTCGAGCTCGTTTAAAC	0		0		0
YBR274W	CHK1	2	755816	757399	+	CATAAGAGTATATCATAAGTTGCTGTATATGGGCAGCACGTATTACTATG	TGTTCAAGAAAATTTCAACTATCTGTAGGGATATTATCCTAATTCCCAAC	TTTTTTTTGATCAGTGCATCTTAACCCTTCTTTTGTCTCCATTTTTTTCA	CATAAGAGTATATCATAAGTTGCTGTATATGGGCAGCACGTATTACTATGCGGATCCCCGGGTTAATTAA	TGTTCAAGAAAATTTCAACTATCTGTAGGGATATTATCCTAATTCCCAACCGGATCCCCGGGTTAATTAA	TTTTTTTTGATCAGTGCATCTTAACCCTTCTTTTGTCTCCATTTTTTTCAGAATTCGAGCTCGTTTAAAC	0		0		0
YBR275C	RIF1	2	757578	763328	-	TTATTACAGGATTGCCATTGCAAAATCGTTTTTGTGGTCAATTTGCAATG	ATTTTATGATGAGGCTCGAATATTACTCAAACAGGGATAATGATATGAAT	ATTGTAATTAATTTATTGCCATTTTGATCTATTCTACATACTAACAATCA	TTATTACAGGATTGCCATTGCAAAATCGTTTTTGTGGTCAATTTGCAATGCGGATCCCCGGGTTAATTAA	ATTTTATGATGAGGCTCGAATATTACTCAAACAGGGATAATGATATGAATCGGATCCCCGGGTTAATTAA	ATTGTAATTAATTTATTGCCATTTTGATCTATTCTACATACTAACAATCAGAATTCGAGCTCGTTTAAAC	0		0		0
YBR276C	PPS1	2	763842	766265	-	TGTCATTGAGGTAGAAGGGGCGGGTATAGAAAACTAGAGCAACAACCATG	ATTGGCACATCATCTGTAGGGGTATCGCTGAGGTTAATATGAAGTACACA	ATTTTCCTACGTATTATACAGTTGTACGTATACTTATATAACAAAGTTCA	TGTCATTGAGGTAGAAGGGGCGGGTATAGAAAACTAGAGCAACAACCATGCGGATCCCCGGGTTAATTAA	ATTGGCACATCATCTGTAGGGGTATCGCTGAGGTTAATATGAAGTACACACGGATCCCCGGGTTAATTAA	ATTTTCCTACGTATTATACAGTTGTACGTATACTTATATAACAAAGTTCAGAATTCGAGCTCGTTTAAAC	0		0		0
YBR277C	YBR277C	2	766437	766838	-	ATTCAGGCTCTTCTATAACAACCTCTTGATCGCTCCGACCCGGTTGCATG	CTTGTTTTTATCAGTTGGGACAGGCAGTTGTTAAGGCCATTAATTTCGCG	TTGCAATTATGTTTCCATGATGCTTTTGAAGTAATAATTTATTTTTATTA	ATTCAGGCTCTTCTATAACAACCTCTTGATCGCTCCGACCCGGTTGCATGCGGATCCCCGGGTTAATTAA	CTTGTTTTTATCAGTTGGGACAGGCAGTTGTTAAGGCCATTAATTTCGCGCGGATCCCCGGGTTAATTAA	TTGCAATTATGTTTCCATGATGCTTTTGAAGTAATAATTTATTTTTATTAGAATTCGAGCTCGTTTAAAC	1	YBR278W	1	YBR278W	0
YBR278W	DPB3	2	766516	767121	+	GTCCCAACTGATAAAAACAAGCAAGGGTCAACCGTGTTGCAAAAAAAATG	ATTCCGACTCTTCTGATATCGAAGTTGACCATACGAAAAGCACCGATCCT	AACATATTGCATCGAATAGTAATTACATAGCAATAATAGCAATAACACTA	GTCCCAACTGATAAAAACAAGCAAGGGTCAACCGTGTTGCAAAAAAAATGCGGATCCCCGGGTTAATTAA	ATTCCGACTCTTCTGATATCGAAGTTGACCATACGAAAAGCACCGATCCTCGGATCCCCGGGTTAATTAA	AACATATTGCATCGAATAGTAATTACATAGCAATAATAGCAATAACACTAGAATTCGAGCTCGTTTAAAC	1	YBR277C	1	YBR277C	0
YBR279W	PAF1	2	767482	768837	+	GTATTCAGTACAATAGAACAGTGCTCATAATAGTATAAAGGGTCACAATG	TTCATACTGAACAAAAACCAGAGGAAGAAAAGGAAACTTTACAAGAAGAA	AAAAGAACTACAGGTTTAAAATCAATCTCCCTTCACTTCTCAATATTCTA	GTATTCAGTACAATAGAACAGTGCTCATAATAGTATAAAGGGTCACAATGCGGATCCCCGGGTTAATTAA	TTCATACTGAACAAAAACCAGAGGAAGAAAAGGAAACTTTACAAGAAGAACGGATCCCCGGGTTAATTAA	AAAAGAACTACAGGTTTAAAATCAATCTCCCTTCACTTCTCAATATTCTAGAATTCGAGCTCGTTTAAAC	0		0		0
YBR280C	SAF1	2	769027	770940	-	TTATTGTCCAAAGGATATACTCTCAATTATAAATGGAAAAGCACATCATG	GTGTAACTGCTGGTGGCTGGCAAACCGGTGCATTAATCATCAAGAAGCAT	CACCCAAACGGAATCCAAAATGCAAAATCGAAATGACACCTAAAAATTCA	TTATTGTCCAAAGGATATACTCTCAATTATAAATGGAAAAGCACATCATGCGGATCCCCGGGTTAATTAA	GTGTAACTGCTGGTGGCTGGCAAACCGGTGCATTAATCATCAAGAAGCATCGGATCCCCGGGTTAATTAA	CACCCAAACGGAATCCAAAATGCAAAATCGAAATGACACCTAAAAATTCAGAATTCGAGCTCGTTTAAAC	0		0		0
YBR281C	DUG2	2	771213	773849	-	CCCTGTAAGGAAAAGTGAAAAACGAGGGCAGAAGTAATTGTGAAATCATG	AAAATTGGTCTAATTTGACTGAGATTTTGTCTAAAGTATTCAATAGGTTA	AAATTGGGTATATATTAAGCACTTTAAAATCAATTGTTTGTAGTTGTTTA	CCCTGTAAGGAAAAGTGAAAAACGAGGGCAGAAGTAATTGTGAAATCATGCGGATCCCCGGGTTAATTAA	AAAATTGGTCTAATTTGACTGAGATTTTGTCTAAAGTATTCAATAGGTTACGGATCCCCGGGTTAATTAA	AAATTGGGTATATATTAAGCACTTTAAAATCAATTGTTTGTAGTTGTTTAGAATTCGAGCTCGTTTAAAC	0		0		0
YBR282W	MRPL27	2	774482	774922	+	ACGGGAATCAAAGATTACCTTGAAAGTGAGGACAGCAAATAACTAAAATG	GGGTACAAAGCGAAGGGGCCACCGACACTTCATGTTATAAGGAGCGTGGA	TCGAAAACTAGTATTTACACGCATATTGAAGAAAGATTATAAATAACTTA	ACGGGAATCAAAGATTACCTTGAAAGTGAGGACAGCAAATAACTAAAATGCGGATCCCCGGGTTAATTAA	GGGTACAAAGCGAAGGGGCCACCGACACTTCATGTTATAAGGAGCGTGGACGGATCCCCGGGTTAATTAA	TCGAAAACTAGTATTTACACGCATATTGAAGAAAGATTATAAATAACTTAGAATTCGAGCTCGTTTAAAC	0		0		0
YBR283C	SSH1	2	775185	776657	-	ACGCATTTTTTAGCACATTTGCCCCCGCCACTCTCCATTGTTTTAGTATG	GTGGCGGTCAAAGTGCTTTGAATCAAGTCTTGGGTGTTCCAGGTGCTATG	AATTTGATCTTCTTTTTTGTTTTCCTTCTTTTTTTTCTTTTCTTTGTTTA	ACGCATTTTTTAGCACATTTGCCCCCGCCACTCTCCATTGTTTTAGTATGCGGATCCCCGGGTTAATTAA	GTGGCGGTCAAAGTGCTTTGAATCAAGTCTTGGGTGTTCCAGGTGCTATGCGGATCCCCGGGTTAATTAA	AATTTGATCTTCTTTTTTGTTTTCCTTCTTTTTTTTCTTTTCTTTGTTTAGAATTCGAGCTCGTTTAAAC	0		0		0
YBR284W	YBR284W	2	777481	779874	+	GTAAATAGTACAGGAAAAGGAGGACTTATCAGGGTATCACACAAACAATG	GTCAATATCGCAGTAGCACTCTCGCAGGGGAGTGGCGACTCATAATTGCG	TAATATTAGCGTCACAATATGCGCCCCTCGAAGAAACATGAGCGAATTCA	GTAAATAGTACAGGAAAAGGAGGACTTATCAGGGTATCACACAAACAATGCGGATCCCCGGGTTAATTAA	GTCAATATCGCAGTAGCACTCTCGCAGGGGAGTGGCGACTCATAATTGCGCGGATCCCCGGGTTAATTAA	TAATATTAGCGTCACAATATGCGCCCCTCGAAGAAACATGAGCGAATTCAGAATTCGAGCTCGTTTAAAC	0		0		0
YBR285W	YBR285W	2	780164	780598	+	TTTATAACATAACAATTCGAAATCTCTAAGCTCGCTTATAGTTGACAATG	GCAGAATACTAAAGTGTAGCACTAGAAGGAGCTACTTGAGATACAAGAAA	AAGAAAGGTGATTATATCAAGATATATAATGAAGCAGCTCAATTGTCTTA	TTTATAACATAACAATTCGAAATCTCTAAGCTCGCTTATAGTTGACAATGCGGATCCCCGGGTTAATTAA	GCAGAATACTAAAGTGTAGCACTAGAAGGAGCTACTTGAGATACAAGAAACGGATCCCCGGGTTAATTAA	AAGAAAGGTGATTATATCAAGATATATAATGAAGCAGCTCAATTGTCTTAGAATTCGAGCTCGTTTAAAC	0		0		0
YBR286W	APE3,APY1	2	780942	782555	+	AATTGGTAGAAGAAGCCAAAAAAAAAAAAAAAACAGAAACGCCAACCATG	TGAATGCTCAACAACCACAATTTAAGTACAGGGCCGACTTCTTGATTATT	TTTTCTTTTAGATAATTATACAGAAATACTTGATGTGAACAGTACACTTA	AATTGGTAGAAGAAGCCAAAAAAAAAAAAAAAACAGAAACGCCAACCATGCGGATCCCCGGGTTAATTAA	TGAATGCTCAACAACCACAATTTAAGTACAGGGCCGACTTCTTGATTATTCGGATCCCCGGGTTAATTAA	TTTTCTTTTAGATAATTATACAGAAATACTTGATGTGAACAGTACACTTAGAATTCGAGCTCGTTTAAAC	0		0		0
YBR287W	ZSP1	2	782813	784096	+	ATTCCCAACTAACCATACCCTCATAGATTACTCTGCATTTCTACTATATG	TTATTGTTGTCTCAGGTGCAATTTACGTTTTACAGTGGGCTAACCCAACT	AAGACTTTCATTCATGAAGACTCTATACAAAGGAATGAAAAGTTGTATTA	ATTCCCAACTAACCATACCCTCATAGATTACTCTGCATTTCTACTATATGCGGATCCCCGGGTTAATTAA	TTATTGTTGTCTCAGGTGCAATTTACGTTTTACAGTGGGCTAACCCAACTCGGATCCCCGGGTTAATTAA	AAGACTTTCATTCATGAAGACTCTATACAAAGGAATGAAAAGTTGTATTAGAATTCGAGCTCGTTTAAAC	0		0		0
YBR288C	APM3,YKS6	2	784254	785705	-	TTGGGCAACAACAGAGGCTGTAAACCTTACCAACCCAACCAAAATAGATG	ACAAGGGTGCAAAGTATAAGACCCAGACAGGCAATTTTCAAGTAAGGCTG	CATTATATTCTATTTAGTTTCGCATGGAATTTCAAGTACACATATAACTA	TTGGGCAACAACAGAGGCTGTAAACCTTACCAACCCAACCAAAATAGATGCGGATCCCCGGGTTAATTAA	ACAAGGGTGCAAAGTATAAGACCCAGACAGGCAATTTTCAAGTAAGGCTGCGGATCCCCGGGTTAATTAA	CATTATATTCTATTTAGTTTCGCATGGAATTTCAAGTACACATATAACTAGAATTCGAGCTCGTTTAAAC	0		0		0
YBR289W	SNF5,TYE4,SWI10,HAF4	2	785909	788626	+	AAGCATCATCAAGGGAACATATAGTAAAGAACTACACAAAAGCAACAATG	TGTTGACTAATAGCAATAATGGTAGCAGTAACAATAACACACAGAATACA	ACGGTTATTTACATCTCCGGTATATTTTATATATGTGTATATATTTTCTA	AAGCATCATCAAGGGAACATATAGTAAAGAACTACACAAAAGCAACAATGCGGATCCCCGGGTTAATTAA	TGTTGACTAATAGCAATAATGGTAGCAGTAACAATAACACACAGAATACACGGATCCCCGGGTTAATTAA	ACGGTTATTTACATCTCCGGTATATTTTATATATGTGTATATATTTTCTAGAATTCGAGCTCGTTTAAAC	0		0		0
YBR290W	BSD2	2	788833	789798	+	AAGAGCATGAGAATAACAAGAACACGTAGTCTAGGAAACTAAGCGCTATG	AAGTCAAAAAATTGGAAAAGAAATACCTCAACCAAAGTCAAAATCAAGCA	ACTTAAAAAAGTTATATATCTCTTTTTATCATAATGAAGAAGATGGCTTA	AAGAGCATGAGAATAACAAGAACACGTAGTCTAGGAAACTAAGCGCTATGCGGATCCCCGGGTTAATTAA	AAGTCAAAAAATTGGAAAAGAAATACCTCAACCAAAGTCAAAATCAAGCACGGATCCCCGGGTTAATTAA	ACTTAAAAAAGTTATATATCTCTTTTTATCATAATGAAGAAGATGGCTTAGAATTCGAGCTCGTTTAAAC	0		0		0
YBR291C	CTP1	2	789915	790814	-	GAAAGAACTCCAAAGTAGAGCTTGAATTATAAATTAGCATTTTACCGATG	GTGGTGGTATTGTTTTCACTATCTATGAAAAGGTCTTAGTTATGCTAGCC	TAACGAGTAGAAAACATTAGATGATATATTGTACACAATAATACATTTCA	GAAAGAACTCCAAAGTAGAGCTTGAATTATAAATTAGCATTTTACCGATGCGGATCCCCGGGTTAATTAA	GTGGTGGTATTGTTTTCACTATCTATGAAAAGGTCTTAGTTATGCTAGCCCGGATCCCCGGGTTAATTAA	TAACGAGTAGAAAACATTAGATGATATATTGTACACAATAATACATTTCAGAATTCGAGCTCGTTTAAAC	0		0		0
YBR292C	YBR292C	2	790944	791315	-	TGCAATAACTCTTCTTACTAAGAGGTAACTTACATCTTGACTTTTTAATG	CTGCGGAATTTTCAATTATTAGAAGTGAAAAAAAAAAAAAAGAAGAACAA	CTTCGACATTTTACGTTTTATATATCACGCTAAAGTGAGACTAAATTTCA	TGCAATAACTCTTCTTACTAAGAGGTAACTTACATCTTGACTTTTTAATGCGGATCCCCGGGTTAATTAA	CTGCGGAATTTTCAATTATTAGAAGTGAAAAAAAAAAAAAAGAAGAACAACGGATCCCCGGGTTAATTAA	CTTCGACATTTTACGTTTTATATATCACGCTAAAGTGAGACTAAATTTCAGAATTCGAGCTCGTTTAAAC	0		0		0
YBR293W	VBA2	2	793248	794672	+	CCGTTACAGCTTCGACGTACCAAACGATTGGTAACGAATTTAATCAGATG	TGATACTCTGCATCCTTAAAGACAATCTGGCGAAACCTAAAACAAGAAGA	CTGTTAATGTATCAATTGAGTCGGTCAAGGGCATAGGTATATATTGTTTA	CCGTTACAGCTTCGACGTACCAAACGATTGGTAACGAATTTAATCAGATGCGGATCCCCGGGTTAATTAA	TGATACTCTGCATCCTTAAAGACAATCTGGCGAAACCTAAAACAAGAAGACGGATCCCCGGGTTAATTAA	CTGTTAATGTATCAATTGAGTCGGTCAAGGGCATAGGTATATATTGTTTAGAATTCGAGCTCGTTTAAAC	0		0		0
YBR294W	SUL1,SFP2	2	795477	798056	+	TAGCTTTAAAAATAAAAATAAATCCCTGCAGAATACTCGGAAAGAATATG	ATTTACCGTTTTTTCATATCGATATACCCGATTTTTCTAAATGGGACGTT	ATAACTAAAAACAGGGGGGGTAATTAAAGTACTTACTATCTACTACACTA	TAGCTTTAAAAATAAAAATAAATCCCTGCAGAATACTCGGAAAGAATATGCGGATCCCCGGGTTAATTAA	ATTTACCGTTTTTTCATATCGATATACCCGATTTTTCTAAATGGGACGTTCGGATCCCCGGGTTAATTAA	ATAACTAAAAACAGGGGGGGTAATTAAAGTACTTACTATCTACTACACTAGAATTCGAGCTCGTTTAAAC	0		0		0
YBR295W	PCA1,PAY2,CAD2	2	799091	802741	+	TGCTTCCAGGATTTATACAATGAAAGAGCCCAAAGCTGCTGATAACGATG	GTATCCTCCCTGTAATTTTTGTAGCTATACTTCTGCGTTATGCAAAGATT	AGAAAAGAAAAAAGAAAATCTACAATCAAATAGCAGCAGTACCTGGACTA	TGCTTCCAGGATTTATACAATGAAAGAGCCCAAAGCTGCTGATAACGATGCGGATCCCCGGGTTAATTAA	GTATCCTCCCTGTAATTTTTGTAGCTATACTTCTGCGTTATGCAAAGATTCGGATCCCCGGGTTAATTAA	AGAAAAGAAAAAAGAAAATCTACAATCAAATAGCAGCAGTACCTGGACTAGAATTCGAGCTCGTTTAAAC	0		0		0
YBR296C	PHO89,ITN1	2	803040	804764	-	ACTGGAGCGTATCTAATCGAATCAATATAAACAAAGATTAAGCAAAAATG	ATGGTATCATTTTGAATGCTCCTCGCTTTGGTGTGGAATACCAAATGACA	TCTACCTAATGTTGTAAAACTGTATTCATAACCGAAACACATTATGATTA	ACTGGAGCGTATCTAATCGAATCAATATAAACAAAGATTAAGCAAAAATGCGGATCCCCGGGTTAATTAA	ATGGTATCATTTTGAATGCTCCTCGCTTTGGTGTGGAATACCAAATGACACGGATCCCCGGGTTAATTAA	TCTACCTAATGTTGTAAAACTGTATTCATAACCGAAACACATTATGATTAGAATTCGAGCTCGTTTAAAC	0		0		0
YBR296C-A	YBR296C-A	2	806365	806484	-	CTGGGGAATTTATTTTTCAAGATTTGGTTCCAGGTTTTTCCCCAGAAATG	CCATTTCCTTGTCAACTCTGTCTTATATCAGAGTCCATAAACTAGTAAAA	GTTTGTGAAAAAAATTTTATGGTGAGATATTGTTCGATTCTACGAAGTCA	CTGGGGAATTTATTTTTCAAGATTTGGTTCCAGGTTTTTCCCCAGAAATGCGGATCCCCGGGTTAATTAA	CCATTTCCTTGTCAACTCTGTCTTATATCAGAGTCCATAAACTAGTAAAACGGATCCCCGGGTTAATTAA	GTTTGTGAAAAAAATTTTATGGTGAGATATTGTTCGATTCTACGAAGTCAGAATTCGAGCTCGTTTAAAC	0		0		0
YBR297W	MAL33,MALR,MAL3R	2	806765	808171	+	TATCAAACATCGAACGAGAGCATCTTGAAGATATTTATGTTCTAAATATG	GACCACTGCGCCTAAATGATGATTCCAAAGATGAAGACGACATAATTCCT	TCTATCAGTATATCTATCTCGTATAAGTGAACGGCGTGAACAATAAATTA	TATCAAACATCGAACGAGAGCATCTTGAAGATATTTATGTTCTAAATATGCGGATCCCCGGGTTAATTAA	GACCACTGCGCCTAAATGATGATTCCAAAGATGAAGACGACATAATTCCTCGGATCCCCGGGTTAATTAA	TCTATCAGTATATCTATCTCGTATAAGTGAACGGCGTGAACAATAAATTAGAATTCGAGCTCGTTTAAAC	0		0		0
YBR298C	MAL31,MALT,MAL3T	2	808873	810717	-	GTATTCAGTATAACAATAAGAATTACATCCAAGACTATTAATTAACTATG	AAACTTCTGTGGTAGATGAAGGGCGAAACACCTCATCTGTTGTGAACAAA	ATAAAATAAAATTAAATAACGCCGTATCTACCTACTGGCTAAAAAAATCA	GTATTCAGTATAACAATAAGAATTACATCCAAGACTATTAATTAACTATGCGGATCCCCGGGTTAATTAA	AAACTTCTGTGGTAGATGAAGGGCGAAACACCTCATCTGTTGTGAACAAACGGATCCCCGGGTTAATTAA	ATAAAATAAAATTAAATAACGCCGTATCTACCTACTGGCTAAAAAAATCAGAATTCGAGCTCGTTTAAAC	0		0		0
YBR298C-A	YBR298C-A	2	811277	811498	-	AAAAACTGCTTAAGAGATAGATGGTTTAATTTTTTAGAGACGTATTAATG	CACTCTTCGAGCCAATTCTTAATTGTGTGGGGTCCGCGAAAACTTCCGGA	GTTGAAAATTTCGCTAAACACGGGGTTTAAGTTTAAGTTTACAGGATTTA	AAAAACTGCTTAAGAGATAGATGGTTTAATTTTTTAGAGACGTATTAATGCGGATCCCCGGGTTAATTAA	CACTCTTCGAGCCAATTCTTAATTGTGTGGGGTCCGCGAAAACTTCCGGACGGATCCCCGGGTTAATTAA	GTTGAAAATTTCGCTAAACACGGGGTTTAAGTTTAAGTTTACAGGATTTAGAATTCGAGCTCGTTTAAAC	0		0		0
YBR299W	MAL32,MALS,MAL3S	2	811593	813347	+	TTGATAATCTCAAATGTACATCAGTCAAGCGTAACTAAAATACATAAATG	TTTCCTCCAGAGTTTTGAAACCATGGGAAGGTAGAATCTACCTCGTCAAA	TCTGTTATTTCGTTAAAGTACGCGCTAAAAAAAAGTCGGCACTAATTTTA	TTGATAATCTCAAATGTACATCAGTCAAGCGTAACTAAAATACATAAATGCGGATCCCCGGGTTAATTAA	TTTCCTCCAGAGTTTTGAAACCATGGGAAGGTAGAATCTACCTCGTCAAACGGATCCCCGGGTTAATTAA	TCTGTTATTTCGTTAAAGTACGCGCTAAAAAAAAGTCGGCACTAATTTTAGAATTCGAGCTCGTTTAAAC	0		0		0
YBR300C	YBR300C	2	814842	815339	-	TTTCGTCAGATTGAGCTAGAGTGGTGGTTGCGGAAGCAGTAGCAGCGATG	ACCAAATTTGCTTTGAACCCTCGTTAAGAGGCCACCTAATCTTTGTGCTC	TTCTATTTTAAGAAAAACAGAATCGACAATTTTCCCGTAGCAACCGTTTA	TTTCGTCAGATTGAGCTAGAGTGGTGGTTGCGGAAGCAGTAGCAGCGATGCGGATCCCCGGGTTAATTAA	ACCAAATTTGCTTTGAACCCTCGTTAAGAGGCCACCTAATCTTTGTGCTCCGGATCCCCGGGTTAATTAA	TTCTATTTTAAGAAAAACAGAATCGACAATTTTCCCGTAGCAACCGTTTAGAATTCGAGCTCGTTTAAAC	1	YBR301W	1	YBR301W	0
YBR301W	DAN3	2	815299	815661	+	TATTTCTTGTTAAGCTTACATCAGCACTAAAAAACAAAACAAATACAATG	CAGCCATCTCTAGTGCTCTATCCAAGGACGGTATCTACACTATCGCAAAC	GTTATTTCTTAAGGTTTATGGAATTTCATTCGTAAAGGCATCAGTCTCTA	TATTTCTTGTTAAGCTTACATCAGCACTAAAAAACAAAACAAATACAATGCGGATCCCCGGGTTAATTAA	CAGCCATCTCTAGTGCTCTATCCAAGGACGGTATCTACACTATCGCAAACCGGATCCCCGGGTTAATTAA	GTTATTTCTTAAGGTTTATGGAATTTCATTCGTAAAGGCATCAGTCTCTAGAATTCGAGCTCGTTTAAAC	1	YBR300C	1	YBR300C	0
YBR302C	COS2	2	816581	817720	-	NNNNNNNNNNNNNNNNNNNNNNNNNNNNNNNNNNNNNNNNNNCGAAAATG	GGCCATACATTAAAGAAGCGCAATTATCCCGCAGTGAGGTGCTCTTAGTG	AGCTGACAAACTACAAAATATATAAATTGAAAAAGTTGTATTTATCTCTA	NNNNNNNNNNNNNNNNNNNNNNNNNNNNNNNNNNNNNNNNNNCGAAAATGCGGATCCCCGGGTTAATTAA	GGCCATACATTAAAGAAGCGCAATTATCCCGCAGTGAGGTGCTCTTAGTGCGGATCCCCGGGTTAATTAA	AGCTGACAAACTACAAAATATATAAATTGAAAAAGTTGTATTTATCTCTAGAATTCGAGCTCGTTTAAAC	0		0		0
YCL076W	YCL076W	3	1396	2139	+	ATTACATTTACATGACATATAGGAAGGTCCAATAAACTTACTACATTATG	TTGCACAAGACAGAAGAAACTATCAAAAGAAAGGAAATAAGGGATGTATA	TCGTTTAAGCAGAGAACAGTTGCTTATGCGATGATCAGCTCCGTAAATTA	ATTACATTTACATGACATATAGGAAGGTCCAATAAACTTACTACATTATGCGGATCCCCGGGTTAATTAA	TTGCACAAGACAGAAGAAACTATCAAAAGAAAGGAAATAAGGGATGTATACGGATCCCCGGGTTAATTAA	TCGTTTAAGCAGAGAACAGTTGCTTATGCGATGATCAGCTCCGTAAATTAGAATTCGAGCTCGTTTAAAC	1	YCL075W	1	YCL075W	0
YCL075W	YCL075W	3	2130	2570	+	TTGGTTGCACAAGACAGAAGAAACTATCAAAAGAAAGGAAATAAGGGATG	TACATGACGTATCTTACGTTCCTGATTTACCAGTTAACCTGATATCCGTT	CCCTCTTTTGTGAACGTAACAGAAGAGTTTGATTTAGTGCATAGTTTTCA	TTGGTTGCACAAGACAGAAGAAACTATCAAAAGAAAGGAAATAAGGGATGCGGATCCCCGGGTTAATTAA	TACATGACGTATCTTACGTTCCTGATTTACCAGTTAACCTGATATCCGTTCGGATCCCCGGGTTAATTAA	CCCTCTTTTGTGAACGTAACAGAAGAGTTTGATTTAGTGCATAGTTTTCAGAATTCGAGCTCGTTTAAAC	1	YCL076W	1	YCL076W	0
YCL074W	YCL074W	3	2828	3754	+	GATTATTTCTGGCCCTTGCTAGCTGCCTCAAACTAATAGTATATCAGATG	CATCTACTGAGGCAGAATACATTACTGCAAGTGAAACTGTCATGGAGATA	GATGAGATAAGTGGCTGGCCTAAGTGTTCAAACAAGTTTTGAATCCATTA	GATTATTTCTGGCCCTTGCTAGCTGCCTCAAACTAATAGTATATCAGATGCGGATCCCCGGGTTAATTAA	CATCTACTGAGGCAGAATACATTACTGCAAGTGAAACTGTCATGGAGATACGGATCCCCGGGTTAATTAA	GATGAGATAAGTGGCTGGCCTAAGTGTTCAAACAAGTTTTGAATCCATTAGAATTCGAGCTCGTTTAAAC	0		0		0
YCL073C	YCL073C	3	6483	8330	-	AAAGAGAAAAAAAAAAAAAAGGAATAATCAAGTAAATAAATTATCGGATG	AAATCAAGGCACTTTTTAGACATAATCGAAGTAACAAGAAATTAGGATGT	TGATTTTGCTTTCATTTTTTTTTGCCCTTTTTTCACCAGCTTGGGGATCA	AAAGAGAAAAAAAAAAAAAAGGAATAATCAAGTAAATAAATTATCGGATGCGGATCCCCGGGTTAATTAA	AAATCAAGGCACTTTTTAGACATAATCGAAGTAACAAGAAATTAGGATGTCGGATCCCCGGGTTAATTAA	TGATTTTGCTTTCATTTTTTTTTGCCCTTTTTTCACCAGCTTGGGGATCAGAATTCGAGCTCGTTTAAAC	0		0		0
YCL069W	VBA3	3	9710	11086	+	TACTTATTTTTGAAGCCGGATCCCTAATTGCTGCCCTTGCCTCTTCAATG	TAATCATACCAAAAAAGGACGAGACACCAGAAGATAATTTAGAAGACAAG	TGTATAAAAGGCGAAAAAAATAAAATGAAAATAAGAAAATAACTGCGCTA	TACTTATTTTTGAAGCCGGATCCCTAATTGCTGCCCTTGCCTCTTCAATGCGGATCCCCGGGTTAATTAA	TAATCATACCAAAAAAGGACGAGACACCAGAAGATAATTTAGAAGACAAGCGGATCCCCGGGTTAATTAA	TGTATAAAAGGCGAAAAAAATAAAATGAAAATAAGAAAATAACTGCGCTAGAATTCGAGCTCGTTTAAAC	0		0		0
YCL068C	YCL068C	3	11507	12289	-	TCGCAAAAATACATAAACAATCAACCCTCTCCTCAGACACTACTAAGATG	TTAATAAAAACAAACACAAAAATCACTCCGTCCCTCGTCTAATACAAGTT	GCGCACATAGAATGAAATGTAAACAAAGATTTCAGAAAAATCGTCATTCA	TCGCAAAAATACATAAACAATCAACCCTCTCCTCAGACACTACTAAGATGCGGATCCCCGGGTTAATTAA	TTAATAAAAACAAACACAAAAATCACTCCGTCCCTCGTCTAATACAAGTTCGGATCCCCGGGTTAATTAA	GCGCACATAGAATGAAATGTAAACAAAGATTTCAGAAAAATCGTCATTCAGAATTCGAGCTCGTTTAAAC	0		0		0
YCL067C	HMLALPHA2,ALPHA2	3	12390	13022	-	ATCAGCTTAGAAGTGGGCAAGAAAAAAAGGAAGATAAGCAAGAAAAAATG	CAGAATTAGCGGACCTCTTGAGCGGTGAGCCTCTGGCAAAGAAGAAAGAA	TATATATATATATTCTACACAGATATATACATATTTGTTTTTCGGGCTCA	ATCAGCTTAGAAGTGGGCAAGAAAAAAAGGAAGATAAGCAAGAAAAAATGCGGATCCCCGGGTTAATTAA	CAGAATTAGCGGACCTCTTGAGCGGTGAGCCTCTGGCAAAGAAGAAAGAACGGATCCCCGGGTTAATTAA	TATATATATATATTCTACACAGATATATACATATTTGTTTTTCGGGCTCAGAATTCGAGCTCGTTTAAAC	0		0		0
YCL066W	HMLALPHA1,ALPHA1	3	13286	13813	+	GAAATGTATCAACCATATATAATAACTTAATAGACGACATTCACAATATG	AAGTACGTGGTGACGGATATTGGGAAGATGTGTTTGTACATTTGGCCTTA	CAACATTCAGTACTCGAAAGATAAACAACCTCCGCCACGACCACACTCTA	GAAATGTATCAACCATATATAATAACTTAATAGACGACATTCACAATATGCGGATCCCCGGGTTAATTAA	AAGTACGTGGTGACGGATATTGGGAAGATGTGTTTGTACATTTGGCCTTACGGATCCCCGGGTTAATTAA	CAACATTCAGTACTCGAAAGATAAACAACCTCCGCCACGACCACACTCTAGAATTCGAGCTCGTTTAAAC	1	YCL065W	1	YCL065W	0
YCL065W	YCL065W	3	13755	14123	+	TTTTATAAACCCTGGTTTTGGTTTTGTAGAGTGGTTGACGAATAATTATG	TTGCATTGTCTATATACTGTATTTACCAAATCTTAATTTTAGTCAAACAT	ATTTTCCCAAGGCTTAGTATACACATCCTTAAATACGAAAGTAAACATTA	TTTTATAAACCCTGGTTTTGGTTTTGTAGAGTGGTTGACGAATAATTATGCGGATCCCCGGGTTAATTAA	TTGCATTGTCTATATACTGTATTTACCAAATCTTAATTTTAGTCAAACATCGGATCCCCGGGTTAATTAA	ATTTTCCCAAGGCTTAGTATACACATCCTTAAATACGAAAGTAAACATTAGAATTCGAGCTCGTTTAAAC	1	YCL066W	1	YCL066W	0
YCL064C	CHA1	3	15802	16884	-	TTTTTTAAGTGCTGGATAGACAAGAGACAGGAAAATTAACCAGCGAGATG	CTGACAATTTCATATTTCCAGAAAAAAATATTGTGAATTTAAAAAGTGCT	AATTATCAAGGGCAAATTGATGCTTCAACGAAAAAGTTATTGGATTTTCA	TTTTTTAAGTGCTGGATAGACAAGAGACAGGAAAATTAACCAGCGAGATGCGGATCCCCGGGTTAATTAA	CTGACAATTTCATATTTCCAGAAAAAAATATTGTGAATTTAAAAAGTGCTCGGATCCCCGGGTTAATTAA	AATTATCAAGGGCAAATTGATGCTTCAACGAAAAAGTTATTGGATTTTCAGAATTCGAGCTCGTTTAAAC	0		0		0
YCL063W	VAC17,YCL062W	3	17294	18565	+	GATAGATAAGAAACAGCTCGCATAAGGAAACAAGGACACATCGATTAATG	GCGTCTCTATAGAAGAATTGCAAGATGCTTTGAATACAGAACTGCTGTTT	AAACATTTGGAGCAAAAGAAGAGTAGGTTAGGTAAAGGAGGCATTAATTA	GATAGATAAGAAACAGCTCGCATAAGGAAACAAGGACACATCGATTAATGCGGATCCCCGGGTTAATTAA	GCGTCTCTATAGAAGAATTGCAAGATGCTTTGAATACAGAACTGCTGTTTCGGATCCCCGGGTTAATTAA	AAACATTTGGAGCAAAAGAAGAGTAGGTTAGGTAAAGGAGGCATTAATTAGAATTCGAGCTCGTTTAAAC	0		0		0
YCL061C	MRC1,YCL060C	3	18820	22110	-	AGGAAGTTCGTTATTCGCTTTTGAACTTATCACCAAATATTTTAGTGATG	AAACAAAATCGAATAAACTTTTTGAAAGCGGACAAGATAGCTTTGATAAT	ACAGCTTCTGGAGTTCAATCAACTTCTTCGGAAAAGATAAAAAACCACTA	AGGAAGTTCGTTATTCGCTTTTGAACTTATCACCAAATATTTTAGTGATGCGGATCCCCGGGTTAATTAA	AAACAAAATCGAATAAACTTTTTGAAAGCGGACAAGATAGCTTTGATAATCGGATCCCCGGGTTAATTAA	ACAGCTTCTGGAGTTCAATCAACTTCTTCGGAAAAGATAAAAAACCACTAGAATTCGAGCTCGTTTAAAC	0		0		0
YCL059C	KRR1	3	22433	23383	-	GTAGACAGCAAACAAAAGGGTCACACAAATATCCAAATTGGCAAACGATG	CAAAAGATTTCATAGCTCCGGAAGAAGAAGCATACAAGCCAAACCAAAAT	TTCTATATATATATAGACATATATGAAGGATTCCGTAGCGGTGTAAACTA	GTAGACAGCAAACAAAAGGGTCACACAAATATCCAAATTGGCAAACGATGCGGATCCCCGGGTTAATTAA	CAAAAGATTTCATAGCTCCGGAAGAAGAAGCATACAAGCCAAACCAAAATCGGATCCCCGGGTTAATTAA	TTCTATATATATATAGACATATATGAAGGATTCCGTAGCGGTGTAAACTAGAATTCGAGCTCGTTTAAAC	0		0		0
YCL058C	FYV5	3	23527	23985	-	TAAGCGACGATGCTTTATATATATTCAAAAAAAAAAATAATAAAAATATG	TGCTAAATGCCCTTGAGTTATTGTACCTTATTATAGCAGGCTTGCACATC	TCATCGCTAAAAGAATTAGAAATATAAGGAAAAAAAAATTTTCGTTTTCA	TAAGCGACGATGCTTTATATATATTCAAAAAAAAAAATAATAAAAATATGCGGATCCCCGGGTTAATTAA	TGCTAAATGCCCTTGAGTTATTGTACCTTATTATAGCAGGCTTGCACATCCGGATCCCCGGGTTAATTAA	TCATCGCTAAAAGAATTAGAAATATAAGGAAAAAAAAATTTTCGTTTTCAGAATTCGAGCTCGTTTAAAC	1	YCL058W-A	1	YCL058W-A	0
YCL058W-A	YCL058W-A	3	23588	23929	+	CTGCTATAATAAGGTACAATAACTCAAGGGCATTTAGCAAGGAAAAAATG	CAAACGACAGCATGCTGAAGCAGATCGAAATGATATCCGGCTTTTCCTTA	CATTCCGCTCTATATGTATATATTTACGTAACTTTCACCACTATTCCCTA	CTGCTATAATAAGGTACAATAACTCAAGGGCATTTAGCAAGGAAAAAATGCGGATCCCCGGGTTAATTAA	CAAACGACAGCATGCTGAAGCAGATCGAAATGATATCCGGCTTTTCCTTACGGATCCCCGGGTTAATTAA	CATTCCGCTCTATATGTATATATTTACGTAACTTTCACCACTATTCCCTAGAATTCGAGCTCGTTTAAAC	1	YCL058C	1	YCL058C	0
YCL057C-A	YCL057C-A	3	24036	24329	-	AACTTTGCTACGAGAGGGAATAAACACGGAAAAAGACAAAATATACCATG	AGGGCGACGCCATCTTTAGATCCAGCGCTGGCCTCAGATCCTCGAAGGTT	TTTATTATTTTTTTTTTTGAATATATATAAAGCATCGTCGCTTAAGACTA	AACTTTGCTACGAGAGGGAATAAACACGGAAAAAGACAAAATATACCATGCGGATCCCCGGGTTAATTAA	AGGGCGACGCCATCTTTAGATCCAGCGCTGGCCTCAGATCCTCGAAGGTTCGGATCCCCGGGTTAATTAA	TTTATTATTTTTTTTTTTGAATATATATAAAGCATCGTCGCTTAAGACTAGAATTCGAGCTCGTTTAAAC	0		0		0
YCL057W	PRD1	3	24772	26910	+	GAAGGAATGGTTGGATTTGAGTTTAAAAATAGAGGGAATACTTGGAGATG	GTAGGGAACCTTCTAAGGATGCTTTCTTGAAGGAGCTGGGCTTACAGAAC	TAATAACACTTTGTAGAATAATTGTATAATTTTATGCTTGAACGAATTTA	GAAGGAATGGTTGGATTTGAGTTTAAAAATAGAGGGAATACTTGGAGATGCGGATCCCCGGGTTAATTAA	GTAGGGAACCTTCTAAGGATGCTTTCTTGAAGGAGCTGGGCTTACAGAACCGGATCCCCGGGTTAATTAA	TAATAACACTTTGTAGAATAATTGTATAATTTTATGCTTGAACGAATTTAGAATTCGAGCTCGTTTAAAC	0		0		0
YCL056C	YCL056C	3	26929	27363	-	GTAAAGAGGAGATGAATAAAAGTAAAGGAAGAAGAAAAGAAAGTTGAATG	GGTTATTTAAAAGATTATCTAACATAATAACACTTTGTAGAATAATTGTA	TCTTGAAGGAGCTGGGCTTACAGAACTAAATTCGTTCAAGCATAAAATTA	GTAAAGAGGAGATGAATAAAAGTAAAGGAAGAAGAAAAGAAAGTTGAATGCGGATCCCCGGGTTAATTAA	GGTTATTTAAAAGATTATCTAACATAATAACACTTTGTAGAATAATTGTACGGATCCCCGGGTTAATTAA	TCTTGAAGGAGCTGGGCTTACAGAACTAAATTCGTTCAAGCATAAAATTAGAATTCGAGCTCGTTTAAAC	0		0		0
YCL055W	KAR4	3	27933	28940	+	GTAGAACAGCCATTATAAAACAAAAGAGAAGTGAGAATACTATTAAGATG	AAAATGAGATTGAGCTGTTAAGACCAAGAAGTCCAGTACAAAAAGCACAA	TACTAGTATATTTAATTGAGCTAAGCAAGGATTTATGTGTTGATGCTTTA	GTAGAACAGCCATTATAAAACAAAAGAGAAGTGAGAATACTATTAAGATGCGGATCCCCGGGTTAATTAA	AAAATGAGATTGAGCTGTTAAGACCAAGAAGTCCAGTACAAAAAGCACAACGGATCCCCGGGTTAATTAA	TACTAGTATATTTAATTGAGCTAAGCAAGGATTTATGTGTTGATGCTTTAGAATTCGAGCTCGTTTAAAC	0		0		0
YCL054W	SPB1	3	31453	33978	+	GCTTCAGTTTGTAGTTAGATTTAACTCAATAGAGGTGATTGGCAAAAATG	ATGAACAAAGAGCCCTAAGACGTATCGCAAAGAAGCATCACAAGAAAAAG	TATTTTCAATATTATACAAGGGAATGGAAAAATAATGCTCTTTGTTACTA	GCTTCAGTTTGTAGTTAGATTTAACTCAATAGAGGTGATTGGCAAAAATGCGGATCCCCGGGTTAATTAA	ATGAACAAAGAGCCCTAAGACGTATCGCAAAGAAGCATCACAAGAAAAAGCGGATCCCCGGGTTAATTAA	TATTTTCAATATTATACAAGGGAATGGAAAAATAATGCTCTTTGTTACTAGAATTCGAGCTCGTTTAAAC	0		0		0
YCL052C	PBN1	3	34147	35397	-	AATCGGGAGGAGAATAAACGCAAGAAGTGTGCGTTTCTAGCTGAGTAATG	TCTCCAAGGTATTTGGTAACAACAAGAAGAAAAGATCAGTAAAACGGGAA	CCTATCGTTTTGAATTCAGAAAATACGAGTGCACAGTAGAACAATTTTTA	AATCGGGAGGAGAATAAACGCAAGAAGTGTGCGTTTCTAGCTGAGTAATGCGGATCCCCGGGTTAATTAA	TCTCCAAGGTATTTGGTAACAACAAGAAGAAAAGATCAGTAAAACGGGAACGGATCCCCGGGTTAATTAA	CCTATCGTTTTGAATTCAGAAAATACGAGTGCACAGTAGAACAATTTTTAGAATTCGAGCTCGTTTAAAC	0		0		0
YCL051W	LRE1	3	35869	37620	+	TTCTGAACCCTCGGCAATTATTTCATACTCCTTCTCAGAATAGGAAAATG	GGAAAAGAAAATCCAAATTAGGACTCTTTAGACATATTTTTTCAAGGAAG	TAAGGTTACGATTCACCTTTTTATTACTTATTATTAATATTGTTGTATTA	TTCTGAACCCTCGGCAATTATTTCATACTCCTTCTCAGAATAGGAAAATGCGGATCCCCGGGTTAATTAA	GGAAAAGAAAATCCAAATTAGGACTCTTTAGACATATTTTTTCAAGGAAGCGGATCCCCGGGTTAATTAA	TAAGGTTACGATTCACCTTTTTATTACTTATTATTAATATTGTTGTATTAGAATTCGAGCTCGTTTAAAC	0		0		0
YCL050C	APA1,DTP1	3	37840	38805	-	TTTAGATAGATTTTAGAACAAACAGAAAAGTAAAAATTAAAATAAAAATG	AATGTGGTTTCCCAAACACTTCTGGTCAAAAACCAAACGAATACAACTAT	ATATATATACATACATGTATACGTGTATACTTGTACTTGTGAAGGACTCA	TTTAGATAGATTTTAGAACAAACAGAAAAGTAAAAATTAAAATAAAAATGCGGATCCCCGGGTTAATTAA	AATGTGGTTTCCCAAACACTTCTGGTCAAAAACCAAACGAATACAACTATCGGATCCCCGGGTTAATTAA	ATATATATACATACATGTATACGTGTATACTTGTACTTGTGAAGGACTCAGAATTCGAGCTCGTTTAAAC	0		0		0
YCL049C	YCL049C	3	39790	40728	-	GCAATTCCAGGGTTCAAGAGAGAAAAATCTGTAATCACTTCGAACCAATG	AATCTCTTTGGAGTACATTGAAAAAAATTTTCTCTAAAAGAAGTATAAGT	TTGTAGACTTTTTGCTAGAGACCTCATCAAAGTGCTACCAACTAAGATCA	GCAATTCCAGGGTTCAAGAGAGAAAAATCTGTAATCACTTCGAACCAATGCGGATCCCCGGGTTAATTAA	AATCTCTTTGGAGTACATTGAAAAAAATTTTCTCTAAAAGAAGTATAAGTCGGATCCCCGGGTTAATTAA	TTGTAGACTTTTTGCTAGAGACCTCATCAAAGTGCTACCAACTAAGATCAGAATTCGAGCTCGTTTAAAC	0		0		0
YCL048W-A	YCL048W-A	3	41492	41731	+	TAAAACAATTAAAGCTCCCTTTTCAAACCTTATACTTCCGTTAAATAATG	CGGCGGGTGCCTTTGGAGCAGCAATCGCTGCCGGTGTTGCCTTCTTATTC	TTATGGAATTAGAAAGAAAGAAAAAAATAAAGGAAATAAAAATGTTCCTA	TAAAACAATTAAAGCTCCCTTTTCAAACCTTATACTTCCGTTAAATAATGCGGATCCCCGGGTTAATTAA	CGGCGGGTGCCTTTGGAGCAGCAATCGCTGCCGGTGTTGCCTTCTTATTCCGGATCCCCGGGTTAATTAA	TTATGGAATTAGAAAGAAAGAAAAAAATAAAGGAAATAAAAATGTTCCTAGAATTCGAGCTCGTTTAAAC	0		0		0
YCL048W	SPS22	3	42169	43560	+	TACAACAAGGAAAACCAAAAGCCATTTTTTCATTACTTGATCGACTTATG	AATTGGACCCCCTTCTTTTTGGTACATGCCTTGTTGCTATGTTATTGTTT	TAATATTAGGAACAAAAAAAACTTTCTGTTATACTAGACTAGTAATCTTA	TACAACAAGGAAAACCAAAAGCCATTTTTTCATTACTTGATCGACTTATGCGGATCCCCGGGTTAATTAA	AATTGGACCCCCTTCTTTTTGGTACATGCCTTGTTGCTATGTTATTGTTTCGGATCCCCGGGTTAATTAA	TAATATTAGGAACAAAAAAAACTTTCTGTTATACTAGACTAGTAATCTTAGAATTCGAGCTCGTTTAAAC	0		0		0
YCL047C	YCL047C	3	43665	44441	-	ACTTAATCAATGACGGTTGATAGCAGTACGTGCACTAGCAGACTAATATG	TGCCATTGTGCATATACGATTATTTGATCAATAATAAGACAATATTTGAT	TATACATATATCTCCATGAAAGGCATTTGAATTTCTATCTTTCTCTTTCA	ACTTAATCAATGACGGTTGATAGCAGTACGTGCACTAGCAGACTAATATGCGGATCCCCGGGTTAATTAA	TGCCATTGTGCATATACGATTATTTGATCAATAATAAGACAATATTTGATCGGATCCCCGGGTTAATTAA	TATACATATATCTCCATGAAAGGCATTTGAATTTCTATCTTTCTCTTTCAGAATTCGAGCTCGTTTAAAC	0		0		0
YCL045C	YCL045C	3	44627	46909	-	TACCTACATTCATATCAACACTTTCATCCTCCCCTTCCCCCATAGCAATG	TCCGTCCTTCTGTTTCAAACAAGAAGTTGAAATCCCAATGGCTAATTAAA	GGAGCCTTGAAATGTGTATCTGATATATATAATGTGTATGTAAATATCTA	TACCTACATTCATATCAACACTTTCATCCTCCCCTTCCCCCATAGCAATGCGGATCCCCGGGTTAATTAA	TCCGTCCTTCTGTTTCAAACAAGAAGTTGAAATCCCAATGGCTAATTAAACGGATCCCCGGGTTAATTAA	GGAGCCTTGAAATGTGTATCTGATATATATAATGTGTATGTAAATATCTAGAATTCGAGCTCGTTTAAAC	1	YCL046W	1	YCL046W	0
YCL046W	YCL046W	3	46644	46967	+	CACAAACCATTGCGTTATGGTCATTACTATCCAGTTGAATCTCATCAATG	TGGGGGAAGGGGAGGATGAAAGTGTTGATATGAATGTAGGTATTAGTTAT	ATATTATATATGCAAATATATAATAACATATATATATATACACTCCATTA	CACAAACCATTGCGTTATGGTCATTACTATCCAGTTGAATCTCATCAATGCGGATCCCCGGGTTAATTAA	TGGGGGAAGGGGAGGATGAAAGTGTTGATATGAATGTAGGTATTAGTTATCGGATCCCCGGGTTAATTAA	ATATTATATATGCAAATATATAATAACATATATATATATACACTCCATTAGAATTCGAGCTCGTTTAAAC	1	YCL045C	1	YCL045C	0
YCL044C	MGR1	3	47115	48368	-	CTCATCCTCCTCCATTCCCTCTCCTTTTCCAATTACCGTAATAAAAGATG	AGCCGTTACCAGGGCCTACCCCCAAGGCTCTCACTAATGAAAAGACACAT	AGAAGGATTTAATATACGCACGGTACAACTAAGCAATCCGCAAAGACCTA	CTCATCCTCCTCCATTCCCTCTCCTTTTCCAATTACCGTAATAAAAGATGCGGATCCCCGGGTTAATTAA	AGCCGTTACCAGGGCCTACCCCCAAGGCTCTCACTAATGAAAAGACACATCGGATCCCCGGGTTAATTAA	AGAAGGATTTAATATACGCACGGTACAACTAAGCAATCCGCAAAGACCTAGAATTCGAGCTCGTTTAAAC	0		0		0
YCL043C	PDI1,TRG1,MFP1	3	48657	50225	-	TAAAGCTGCCAAGCTCTACATAAAGAAAAACATACATCTATCCCGTTATG	ATGCTGACGCTGAATTGGCTGACGAAGAAGATGCCATTCACGATGAATTG	AAATTTCTTATATATCTCTATTTAATGAAAAACCAAAGTGATCAGAATTA	TAAAGCTGCCAAGCTCTACATAAAGAAAAACATACATCTATCCCGTTATGCGGATCCCCGGGTTAATTAA	ATGCTGACGCTGAATTGGCTGACGAAGAAGATGCCATTCACGATGAATTGCGGATCCCCGGGTTAATTAA	AAATTTCTTATATATCTCTATTTAATGAAAAACCAAAGTGATCAGAATTAGAATTCGAGCTCGTTTAAAC	1	YCL041C	1	YCL041C	0
YCL041C	YCL041C	3	50137	50631	-	GGGGGCCCCCTGAAAGGGGTTGACCGTCCGTCGGCACACCACTTATAATG	TCCCTGCTGCTCGCCTCCTCTGTTTTCGCCCAACAAGAGGCTGTGGCCCC	TGTACTCATTGAAGGAGTCGGTGGCCAACTTAACGACAGCGGAGTCTTCA	GGGGGCCCCCTGAAAGGGGTTGACCGTCCGTCGGCACACCACTTATAATGCGGATCCCCGGGTTAATTAA	TCCCTGCTGCTCGCCTCCTCTGTTTTCGCCCAACAAGAGGCTGTGGCCCCCGGATCCCCGGGTTAATTAA	TGTACTCATTGAAGGAGTCGGTGGCCAACTTAACGACAGCGGAGTCTTCAGAATTCGAGCTCGTTTAAAC	2	YCL043C;YCL042W	2	YCL043C;YCL042W	0
YCL042W	YCL042W	3	50588	50947	+	AAAAAATCAAAAAAAACAAAAAACGGGAAATAACAATAACGACAAAAATG	GGACCAGATCTGCGACGATTTCGAGGTTACCCCCGAGAAGCTGGACGAAT	CTTTGGTGGAGCTAGACCTTTTTCCATTTGTTCGATGAAGTAAGCAGTTA	AAAAAATCAAAAAAAACAAAAAACGGGAAATAACAATAACGACAAAAATGCGGATCCCCGGGTTAATTAA	GGACCAGATCTGCGACGATTTCGAGGTTACCCCCGAGAAGCTGGACGAATCGGATCCCCGGGTTAATTAA	CTTTGGTGGAGCTAGACCTTTTTCCATTTGTTCGATGAAGTAAGCAGTTAGAATTCGAGCTCGTTTAAAC	2	YCL041C;YCL040W	2	YCL041C;YCL040W	0
YCL040W	GLK1,HOR3	3	50842	52344	+	TCCGTAAACCACAACACCACCACTAATACAACTCTATCATACACAAGATG	TTGCCAAGGATGGTTCCGGAGTGGGTGCCGCCTTGTGTGCGCTTGTAGCA	GGTAAGTACGGTGGGATACGTACACAAACCAAAAAAATGTAAAAAGATCA	TCCGTAAACCACAACACCACCACTAATACAACTCTATCATACACAAGATGCGGATCCCCGGGTTAATTAA	TTGCCAAGGATGGTTCCGGAGTGGGTGCCGCCTTGTGTGCGCTTGTAGCACGGATCCCCGGGTTAATTAA	GGTAAGTACGGTGGGATACGTACACAAACCAAAAAAATGTAAAAAGATCAGAATTCGAGCTCGTTTAAAC	1	YCL042W	1	YCL042W	0
YCL039W	GID7,MOH2	3	52649	54886	+	AAATATGAAAAACACTTCCAAGGGGGCGTACTACTTCAACTAATAAAATG	CTTCTGGCGGTGATGACGGTAAGATAAAAATCTGGAAAATTTCAAGAAAT	TTTTTGTTACATAAAACTTTGCTTACGTATATATATAAGGTGGAGTATTA	AAATATGAAAAACACTTCCAAGGGGGCGTACTACTTCAACTAATAAAATGCGGATCCCCGGGTTAATTAA	CTTCTGGCGGTGATGACGGTAAGATAAAAATCTGGAAAATTTCAAGAAATCGGATCCCCGGGTTAATTAA	TTTTTGTTACATAAAACTTTGCTTACGTATATATATAAGGTGGAGTATTAGAATTCGAGCTCGTTTAAAC	0		0		0
YCL038C	ATG22,AUT4	3	54945	56531	-	GCCCTTATAAGCAATAGTTTGCTCATAACATATTCTCTACATTAGATATG	AGGCTGAAGAACTCAGTCAAGTTTTACCTGAAAGTGAAAGAAGGTTGGAT	ATATATATACGTAAGCAAAGTTTTATGTAACAAAAAAAAAAAAAGAACTA	GCCCTTATAAGCAATAGTTTGCTCATAACATATTCTCTACATTAGATATGCGGATCCCCGGGTTAATTAA	AGGCTGAAGAACTCAGTCAAGTTTTACCTGAAAGTGAAAGAAGGTTGGATCGGATCCCCGGGTTAATTAA	ATATATATACGTAAGCAAAGTTTTATGTAACAAAAAAAAAAAAAGAACTAGAATTCGAGCTCGTTTAAAC	0		0		0
YCL037C	SRO9	3	57378	58682	-	CTGGACCTGCTAACGTGTTTCATCTTCTTTTCACTTCTCTGCCCACGATG	CCAAAGAAGACTCTGCGCCGGTTGCTGCCGGTGAATCCGAGTCTTCCTTA	AATGCAATGAACGAATCCATTTTTTATTTTGCAAGTGTGAGAGGCCTTTA	CTGGACCTGCTAACGTGTTTCATCTTCTTTTCACTTCTCTGCCCACGATGCGGATCCCCGGGTTAATTAA	CCAAAGAAGACTCTGCGCCGGTTGCTGCCGGTGAATCCGAGTCTTCCTTACGGATCCCCGGGTTAATTAA	AATGCAATGAACGAATCCATTTTTTATTTTGCAAGTGTGAGAGGCCTTTAGAATTCGAGCTCGTTTAAAC	0		0		0
YCL036W	GFD2	3	59030	60730	+	AAAGGAGGCAATGAGAACTTGGGTCTTGCTCGAGAGTCCAGATCCACATG	CGTATTTCGGAACTGCTAAAGACGCCTTCACAAGCACTCTTCCGACACAC	ATACAAGCATGTGTTTGTATTTACAGGAAAAAAATCGATGAATATATTTA	AAAGGAGGCAATGAGAACTTGGGTCTTGCTCGAGAGTCCAGATCCACATGCGGATCCCCGGGTTAATTAA	CGTATTTCGGAACTGCTAAAGACGCCTTCACAAGCACTCTTCCGACACACCGGATCCCCGGGTTAATTAA	ATACAAGCATGTGTTTGTATTTACAGGAAAAAAATCGATGAATATATTTAGAATTCGAGCTCGTTTAAAC	0		0		0
YCL035C	GRX1	3	60845	61177	-	GCATTCGCATAATTATACAAATAGACAAAACCTCAGAAGGAAAAAAAATG	TGAGGGAGACTGGTGAATTGGAGGAATTGTTAGAACCTATTCTTGCAAAT	ATAAGCTCATTATAAACCTGTGTGCATGGAAAAAACTTTGTCTGCCCTTA	GCATTCGCATAATTATACAAATAGACAAAACCTCAGAAGGAAAAAAAATGCGGATCCCCGGGTTAATTAA	TGAGGGAGACTGGTGAATTGGAGGAATTGTTAGAACCTATTCTTGCAAATCGGATCCCCGGGTTAATTAA	ATAAGCTCATTATAAACCTGTGTGCATGGAAAAAACTTTGTCTGCCCTTAGAATTCGAGCTCGTTTAAAC	0		0		0
YCL034W	LSB5	3	61662	62726	+	ACAGTGTGAGAGAGTGATAAAGCATTGGAGGCAGGCAAAACAAGAACATG	CTTATCAGCCGTCCACGATCTCAAACCCTTTCGGTGATCATAACAAAATT	TATATATATATATATATATATGTGTGTATGCATACGTACATACTTCTTCA	ACAGTGTGAGAGAGTGATAAAGCATTGGAGGCAGGCAAAACAAGAACATGCGGATCCCCGGGTTAATTAA	CTTATCAGCCGTCCACGATCTCAAACCCTTTCGGTGATCATAACAAAATTCGGATCCCCGGGTTAATTAA	TATATATATATATATATATATGTGTGTATGCATACGTACATACTTCTTCAGAATTCGAGCTCGTTTAAAC	0		0		0
YCL033C	YCL033C	3	62780	63286	-	CGCCGATGATAGTTTAAATAAAGGGAGAAAGGAAGCAATATCAAAAAATG	AGGACACCAGACACTGTGTGAACAGTGCGTCTTTAAACCTCAAGAAGGAT	ATGTACGTATGCATACACACATATATATATATATATATATAGTACATTTA	CGCCGATGATAGTTTAAATAAAGGGAGAAAGGAAGCAATATCAAAAAATGCGGATCCCCGGGTTAATTAA	AGGACACCAGACACTGTGTGAACAGTGCGTCTTTAAACCTCAAGAAGGATCGGATCCCCGGGTTAATTAA	ATGTACGTATGCATACACACATATATATATATATATATATAGTACATTTAGAATTCGAGCTCGTTTAAAC	0		0		0
YCL032W	STE50	3	63445	64485	+	AAGGACTCGAAAAGACAGAGGTCGTACTAGCAGAGATAGCAAATCAGATG	AAGTAGCAATGATGAACGGAAGTGACAATGTCACCCCCGGTGGAAGACTC	TCCTATTCGTGTAAGTTTAGTATGATGATGTGCATGACAACTGCACATTA	AAGGACTCGAAAAGACAGAGGTCGTACTAGCAGAGATAGCAAATCAGATGCGGATCCCCGGGTTAATTAA	AAGTAGCAATGATGAACGGAAGTGACAATGTCACCCCCGGTGGAAGACTCCGGATCCCCGGGTTAATTAA	TCCTATTCGTGTAAGTTTAGTATGATGATGTGCATGACAACTGCACATTAGAATTCGAGCTCGTTTAAAC	0		0		0
YCL031C	RRP7	3	64679	65572	-	CGAACGAACTAGGTAACAGATAACAACCTCAGATAGAGTGTTACGGGATG	AAGAAAGAATCAAGGTAATGAAAGCTAAGAGAAAATTCAATCCATACACT	TTATAGATATATTGAGATATGTTGAATATGATGACGAGGATGGTGGTTTA	CGAACGAACTAGGTAACAGATAACAACCTCAGATAGAGTGTTACGGGATGCGGATCCCCGGGTTAATTAA	AAGAAAGAATCAAGGTAATGAAAGCTAAGAGAAAATTCAATCCATACACTCGGATCCCCGGGTTAATTAA	TTATAGATATATTGAGATATGTTGAATATGATGACGAGGATGGTGGTTTAGAATTCGAGCTCGTTTAAAC	0		0		0
YCL030C	HIS4	3	65938	68337	-	GCTGTGTAATAGTAATACAATAGTTTACAAAATTTTTTTTCTGAATAATG	CTGTGAAAATCAGAATGAGTAAGCTTGGGTTGATCCCAAAGGATTTCCAG	TATACATATTATTTTCGTTAGTGTTCGGTTTCCAAGTTAGAAATAATCTA	GCTGTGTAATAGTAATACAATAGTTTACAAAATTTTTTTTCTGAATAATGCGGATCCCCGGGTTAATTAA	CTGTGAAAATCAGAATGAGTAAGCTTGGGTTGATCCCAAAGGATTTCCAGCGGATCCCCGGGTTAATTAA	TATACATATTATTTTCGTTAGTGTTCGGTTTCCAAGTTAGAAATAATCTAGAATTCGAGCTCGTTTAAAC	0		0		0
YCL029C	BIK1,PAC14,ARM5	3	68603	69925	-	GTAAAAGGCGTTGAGCTGTGGCTGGCTGTGTATGCGTTTGAAATACCATG	ATAATACAGCAGAATGCCCCCATCACAATCCTGACAACCAGCAGTTCTTC	TTAATTAACTAATTTACCGGAGTCACTATTAGAGTCAGTTCGACTGCCTA	GTAAAAGGCGTTGAGCTGTGGCTGGCTGTGTATGCGTTTGAAATACCATGCGGATCCCCGGGTTAATTAA	ATAATACAGCAGAATGCCCCCATCACAATCCTGACAACCAGCAGTTCTTCCGGATCCCCGGGTTAATTAA	TTAATTAACTAATTTACCGGAGTCACTATTAGAGTCAGTTCGACTGCCTAGAATTCGAGCTCGTTTAAAC	0		0		0
YCL028W	RNQ1,%5BPIN(%2B)%5D	3	70154	71371	+	TAAAAGAACGTACATATAGCGATACAAACGTATAGCAAAGATCTGAAATG	TTTCTGGCAACTTTTCTCAACAGAACAATAACGGCAACCAGAACCGCTAC	ATAAACAAATACGTAAACAAAGGATAGAAGGCGAACTGAATCATCGTTCA	TAAAAGAACGTACATATAGCGATACAAACGTATAGCAAAGATCTGAAATGCGGATCCCCGGGTTAATTAA	TTTCTGGCAACTTTTCTCAACAGAACAATAACGGCAACCAGAACCGCTACCGGATCCCCGGGTTAATTAA	ATAAACAAATACGTAAACAAAGGATAGAAGGCGAACTGAATCATCGTTCAGAATTCGAGCTCGTTTAAAC	0		0		0
YCL027W	FUS1	3	71807	73345	+	TTTCCTTTAAGAGCAGGATATAAGCCATCAAGTTTCTGAAAATCAAAATG	TCAATGAAGATAGAGGCATTGTGCCTGGTGACTGTCTCCAAGAATACGAC	ACAGAATTATAGGTATAGATTAAATGCGAACGTCAATATTATTTTCATCA	TTTCCTTTAAGAGCAGGATATAAGCCATCAAGTTTCTGAAAATCAAAATGCGGATCCCCGGGTTAATTAA	TCAATGAAGATAGAGGCATTGTGCCTGGTGACTGTCTCCAAGAATACGACCGGATCCCCGGGTTAATTAA	ACAGAATTATAGGTATAGATTAAATGCGAACGTCAATATTATTTTCATCAGAATTCGAGCTCGTTTAAAC	0		0		0
YCL026C-B	HBN1,YCL027C-A	3	73409	73990	-	CTGAAGTATCCTATATCAACATATATACAAAAAAACAATCCAATATCATG	CACCTCCAGGTGAAAAGACCTACATCAAAAACGATGTTGAAATCTTCAAT	GTTCGCATTTAATCTATACCTATAATTCTGTACTTATATACTGTTCCTTA	CTGAAGTATCCTATATCAACATATATACAAAAAAACAATCCAATATCATGCGGATCCCCGGGTTAATTAA	CACCTCCAGGTGAAAAGACCTACATCAAAAACGATGTTGAAATCTTCAATCGGATCCCCGGGTTAATTAA	GTTCGCATTTAATCTATACCTATAATTCTGTACTTATATACTGTTCCTTAGAATTCGAGCTCGTTTAAAC	0		0		0
YCL026C-A	FRM2,YCLX08C	3	74708	75289	-	TATATACACCATCAAAATCAAGAACACCAGACCTCCAAGCCAAAGAAATG	CCTTGCCAGAAGAAAAGACTTTTATCAATAACGTAATCAACGTTTATCAC	TTACTTCATGAGATAAATTAAGATCTCCTCATATGCGAATTTCCTGTTCA	TATATACACCATCAAAATCAAGAACACCAGACCTCCAAGCCAAAGAAATGCGGATCCCCGGGTTAATTAA	CCTTGCCAGAAGAAAAGACTTTTATCAATAACGTAATCAACGTTTATCACCGGATCCCCGGGTTAATTAA	TTACTTCATGAGATAAATTAAGATCTCCTCATATGCGAATTTCCTGTTCAGAATTCGAGCTCGTTTAAAC	0		0		0
YCL025C	AGP1,YCC5	3	76022	77923	-	TCTTTATAGAAGAAGCACGCTAATATAGACAAAGATAGCTTCGCACAATG	AACGTTTGAGGAACGGACCTTATTGGAAAAGGGTCGTTGCCTTCTGGTGT	AGAAGTACAAAAATGAATAAATATAAAAGAAGTAAATGCTTTTTTTTTTA	TCTTTATAGAAGAAGCACGCTAATATAGACAAAGATAGCTTCGCACAATGCGGATCCCCGGGTTAATTAA	AACGTTTGAGGAACGGACCTTATTGGAAAAGGGTCGTTGCCTTCTGGTGTCGGATCCCCGGGTTAATTAA	AGAAGTACAAAAATGAATAAATATAAAAGAAGTAAATGCTTTTTTTTTTAGAATTCGAGCTCGTTTAAAC	0		0		0
YCL023C	YCL023C	3	78953	79300	-	CCGTTGTTGTTGAAAATGGACTTTGAGATTACTTTGACGGCTGTTCTATG	ACGCGTTTTCTTGCACAGCACGCGAAAAAAAGAACGAGATGTTTTCCTTT	GTAAAGGCGCTCTTTCAGCAATGACGATTTATGCTAATATGTTTTCCTTA	CCGTTGTTGTTGAAAATGGACTTTGAGATTACTTTGACGGCTGTTCTATGCGGATCCCCGGGTTAATTAA	ACGCGTTTTCTTGCACAGCACGCGAAAAAAAGAACGAGATGTTTTCCTTTCGGATCCCCGGGTTAATTAA	GTAAAGGCGCTCTTTCAGCAATGACGATTTATGCTAATATGTTTTCCTTAGAATTCGAGCTCGTTTAAAC	1	YCL024W	1	YCL024W	0
YCL024W	KCC4	3	79166	82279	+	ATAGGCTTGATAATAGTGCTGACGTAAATTACCAGAACTACTGCAGTATG	TTGCTACAGAAATCCAAATTATTTTACAAAAAGAAGGTGTTTTGGACAAA	GTTACATCGTATTGTCCATTTGGGGATCGATTATCCCTCCCTTTTTTTTA	ATAGGCTTGATAATAGTGCTGACGTAAATTACCAGAACTACTGCAGTATGCGGATCCCCGGGTTAATTAA	TTGCTACAGAAATCCAAATTATTTTACAAAAAGAAGGTGTTTTGGACAAACGGATCCCCGGGTTAATTAA	GTTACATCGTATTGTCCATTTGGGGATCGATTATCCCTCCCTTTTTTTTAGAATTCGAGCTCGTTTAAAC	2	YCL023C;YCL022C	2	YCL023C;YCL022C	0
YCL022C	YCL022C	3	81574	82089	-	GCGTAGATCGTAAAAATAAAATACTGTCATTCACCAATTTTCCTGTTATG	GGTTTGGATTTTTATCCTTCATGTCGTATTCCTGTGATATGCCAACGCCT	AAGGATGGTGATAATGTGAATAATGATAATATATTGAGCGACTTTCCTCA	GCGTAGATCGTAAAAATAAAATACTGTCATTCACCAATTTTCCTGTTATGCGGATCCCCGGGTTAATTAA	GGTTTGGATTTTTATCCTTCATGTCGTATTCCTGTGATATGCCAACGCCTCGGATCCCCGGGTTAATTAA	AAGGATGGTGATAATGTGAATAATGATAATATATTGAGCGACTTTCCTCAGAATTCGAGCTCGTTTAAAC	1	YCL024W	1	YCL024W	0
YCL021W-A	YCL021W-A	3	83624	84001	+	AGAAGAACAGTAAAATAAAGCAAGGTACGTGAAATTAATATTTTTAAATG	TCCTGACACCATTGGCTATTTGGATATTTTATATTGACTTTCGTGTACAT	AATAGTCAATGCCCGTGGTTCATTTGCCAATAGAACAGTCGATGTGATCA	AGAAGAACAGTAAAATAAAGCAAGGTACGTGAAATTAATATTTTTAAATGCGGATCCCCGGGTTAATTAA	TCCTGACACCATTGGCTATTTGGATATTTTATATTGACTTTCGTGTACATCGGATCCCCGGGTTAATTAA	AATAGTCAATGCCCGTGGTTCATTTGCCAATAGAACAGTCGATGTGATCAGAATTCGAGCTCGTTTAAAC	0		0		0
YCL020W	YCL020W	3	85229	85269	+	AGAACTTCTAGTATATCTACATACCTAATATTATTGCCTTATAAAAAATG	GCCTTATAAAAAATGGAATCCCAACAATTACATCAAAATCCACGTTCTCT	NNNNNTTTTGAACACACATGAACAAGGAAGTACAGGACAATTGATTTTGA	AGAACTTCTAGTATATCTACATACCTAATATTATTGCCTTATAAAAAATGCGGATCCCCGGGTTAATTAA	GCCTTATAAAAAATGGAATCCCAACAATTACATCAAAATCCACGTTCTCTCGGATCCCCGGGTTAATTAA	NNNNNTTTTGAACACACATGAACAAGGAAGTACAGGACAATTGATTTTGAGAATTCGAGCTCGTTTAAAC	1	YCL019W	1	YCL019W	0
YCL019W	YCL019W	3	85229	85269	+	AGAACTTCTAGTATATCTACATACCTAATATTATTGCCTTATAAAAAATG	GCCTTATAAAAAATGGAATCCCAACAATTACATCAAAATCCACGTTCTCT	NNNNNTTTTGAACACACATGAACAAGGAAGTACAGGACAATTGATTTTGA	AGAACTTCTAGTATATCTACATACCTAATATTATTGCCTTATAAAAAATGCGGATCCCCGGGTTAATTAA	GCCTTATAAAAAATGGAATCCCAACAATTACATCAAAATCCACGTTCTCTCGGATCCCCGGGTTAATTAA	NNNNNTTTTGAACACACATGAACAAGGAAGTACAGGACAATTGATTTTGAGAATTCGAGCTCGTTTAAAC	1	YCL020W	1	YCL020W	0
YCL018W	LEU2	3	86177	87271	+	NNNNNNNNNNNNNNNNNNNNNNNNNNNNNNNNNNNNNNNNNNNNNNNNNN	NNNNNNNNNNNNNNNNNNNNNNNNNNNNNNNNNNNNNNNNNNNNNNNNNN	NNNNNNNNNNNNNNNNNNNNNNNNNNNNNNNNNNNNNNNNNNNNNNNNNN	NNNNNNNNNNNNNNNNNNNNNNNNNNNNNNNNNNNNNNNNNNNNNNNATGCGGATCCCCGGGTTAATTAA	NNNNNNNNNNNNNNNNNNNNNNNNNNNNNNNNNNNNNNNNNNNNNNNNNNCGGATCCCCGGGTTAATTAA	NNNNNNNNNNNNNNNNNNNNNNNNNNNNNNNNNNNNNNNNNNNNNNNNNNGAATTCGAGCTCGTTTAAAC	0		0		0
YCL017C	NFS1,SPL1	3	87630	89123	-	TTCATTAAAATATATCGCATACACGAAGGAACTGCTACAACTGGAAGATG	NNNNNNNNNNNNNNNNNNNNNNNNNNNNNNNNNNNNNNNNNNNNNNNNNN	NNNNNNNNNNNNNNNNNNNNNNNNNNNNNNNNNNNNNNNNNNNNNNNNNN	TTCATTAAAATATATCGCATACACGAAGGAACTGCTACAACTGGAAGATGCGGATCCCCGGGTTAATTAA	NNNNNNNNNNNNNNNNNNNNNNNNNNNNNNNNNNNNNNNNNNNNNNNNNNCGGATCCCCGGGTTAATTAA	NNNNNNNNNNNNNNNNNNNNNNNNNNNNNNNNNNNNNNNNNNNNNNNNNNGAATTCGAGCTCGTTTAAAC	0		0		0
YCL016C	DCC1	3	89474	90616	-	GAACGGTAAAAATCCACCAGAGATTTGCTCACTAATAATCCTGTACCATG	AGTATGCCCGCCGTAAAAGACTGGGCAAAAAGACCGTGGTCACGAGCAGG	TGGTTCCGCTATATATTCGCATTGCCCATCGAAGGCAGTTTTGTGTGCTA	GAACGGTAAAAATCCACCAGAGATTTGCTCACTAATAATCCTGTACCATGCGGATCCCCGGGTTAATTAA	AGTATGCCCGCCGTAAAAGACTGGGCAAAAAGACCGTGGTCACGAGCAGGCGGATCCCCGGGTTAATTAA	TGGTTCCGCTATATATTCGCATTGCCCATCGAAGGCAGTTTTGTGTGCTAGAATTCGAGCTCGTTTAAAC	0		0		0
YCL014W	BUD3,YCL012W	3	91134	96044	+	TTCGGGCTGTTATCTGGTTGCTAAAAGAGTATATTTACACCTCACCAATG	ATGGGAAACAGAACTGCGCTGTTGGTGGCCCAGAGAAACTGAAATTTTAT	GTATACATTGCATTAAATTAAAAAGAAAAAAAAAATCAATAAAACACTCA	TTCGGGCTGTTATCTGGTTGCTAAAAGAGTATATTTACACCTCACCAATGCGGATCCCCGGGTTAATTAA	ATGGGAAACAGAACTGCGCTGTTGGTGGCCCAGAGAAACTGAAATTTTATCGGATCCCCGGGTTAATTAA	GTATACATTGCATTAAATTAAAAAGAAAAAAAAAATCAATAAAACACTCAGAATTCGAGCTCGTTTAAAC	0		0		0
YCL012C	YCL012C	3	96170	96641	-	GAGAAGAAAAGCTACACAATTAATTTCCAAAAATTGCAAATACGAGTATG	CCCCCGATGGAACCCCTATTGATCCAAAAGCATTCACCTTTGATAGTAGG	GGGGGAAAAACCTCCCACTTAAGTAAAACTGAATATATTAGATACCTTTA	GAGAAGAAAAGCTACACAATTAATTTCCAAAAATTGCAAATACGAGTATGCGGATCCCCGGGTTAATTAA	CCCCCGATGGAACCCCTATTGATCCAAAAGCATTCACCTTTGATAGTAGGCGGATCCCCGGGTTAATTAA	GGGGGAAAAACCTCCCACTTAAGTAAAACTGAATATATTAGATACCTTTAGAATTCGAGCTCGTTTAAAC	0		0		0
YCL011C	GBP2,RLF6	3	96928	98211	-	GCTATGGGCGAAAAGGAAACAAACATCAGCTGGATTTTTTCGCCAAGATG	ATTATAATTATGGTGGTTGTAGTTTACAGATCTCTTATGCTAGACGTGAT	ACGTTATCATAAAGTACACAGGTCATGGTTCGGTTGGTGCTTAGGAATTA	GCTATGGGCGAAAAGGAAACAAACATCAGCTGGATTTTTTCGCCAAGATGCGGATCCCCGGGTTAATTAA	ATTATAATTATGGTGGTTGTAGTTTACAGATCTCTTATGCTAGACGTGATCGGATCCCCGGGTTAATTAA	ACGTTATCATAAAGTACACAGGTCATGGTTCGGTTGGTGCTTAGGAATTAGAATTCGAGCTCGTTTAAAC	0		0		0
YCL010C	SGF29	3	98424	99203	-	AGTGGGGGGAGTTTTTCACAGCAAAACACACGGTCACCTTTCTTATTATG	GCCGTCTAGTGCTGCCTTCGCCAACGGCTTTGGCAAACCTAGCAAGGAAA	TGCCATGAGAAGATCTTATGATATGTAGTAAATGTTAACCACCATTGCTA	AGTGGGGGGAGTTTTTCACAGCAAAACACACGGTCACCTTTCTTATTATGCGGATCCCCGGGTTAATTAA	GCCGTCTAGTGCTGCCTTCGCCAACGGCTTTGGCAAACCTAGCAAGGAAACGGATCCCCGGGTTAATTAA	TGCCATGAGAAGATCTTATGATATGTAGTAAATGTTAACCACCATTGCTAGAATTCGAGCTCGTTTAAAC	0		0		0
YCL009C	ILV6	3	99472	100401	-	TATACAGAATCTTTAGAACATCTGAGCTCACTAACCCAGTCTTTCTAATG	AAGACGAAAAGATCAGCGAAATCGTCGACATTTCCCAACTACCACCTGGT	TGTATAGAGGAGAGTCCCGAGGGCGATCGCAAGGCCGAGAGACTAACCTA	TATACAGAATCTTTAGAACATCTGAGCTCACTAACCCAGTCTTTCTAATGCGGATCCCCGGGTTAATTAA	AAGACGAAAAGATCAGCGAAATCGTCGACATTTCCCAACTACCACCTGGTCGGATCCCCGGGTTAATTAA	TGTATAGAGGAGAGTCCCGAGGGCGATCGCAAGGCCGAGAGACTAACCTAGAATTCGAGCTCGTTTAAAC	0		0		0
YCL008C	STP22,VPS23	3	100549	101706	-	AGTTGGTATCTTAACGGCCAAGAAAAGAGAGAGAGTGAAGAGCAACGATG	AGCAATTCCTTGTGCGATGGCACATCCAACGAATCACCTCACCGTTATCG	TAAAAAAATATTTTTTATGGCACTTCGGCGATGCGAAAGAAAGTGAGTCA	AGTTGGTATCTTAACGGCCAAGAAAAGAGAGAGAGTGAAGAGCAACGATGCGGATCCCCGGGTTAATTAA	AGCAATTCCTTGTGCGATGGCACATCCAACGAATCACCTCACCGTTATCGCGGATCCCCGGGTTAATTAA	TAAAAAAATATTTTTTATGGCACTTCGGCGATGCGAAAGAAAGTGAGTCAGAATTCGAGCTCGTTTAAAC	0		0		0
YCL007C	YCL007C	3	101827	102219	-	TCTGCAAATTCAGGTCTCAAATCTGAACGGCGTGGAGCCACCAAGGGATG	TCATTACTCTTTGTTCTTTATTATTCGTTGGACCTTTGTTTCTTAAAGTA	TATTCTCGCTCTGTGAAAAAAGACTACTACATTTTTTGACCTTTTATCTA	TCTGCAAATTCAGGTCTCAAATCTGAACGGCGTGGAGCCACCAAGGGATGCGGATCCCCGGGTTAATTAA	TCATTACTCTTTGTTCTTTATTATTCGTTGGACCTTTGTTTCTTAAAGTACGGATCCCCGGGTTAATTAA	TATTCTCGCTCTGTGAAAAAAGACTACTACATTTTTTGACCTTTTATCTAGAATTCGAGCTCGTTTAAAC	1	YCL005W-A	1	YCL005W-A	0
YCL005W-A	VMA9,LDB10,CWH36	3	101876	102270	+	ATACTTTAAGAAACAAAGGTCCAACGAATAATAAAGAACAAAGAGTAATG	ATCCCTTGGTGGCTCCACGCCGTTCAGATTTGAGACCTGAATTTGCAGAA	TTTTCTTATACTCAGGAAACGTCACTTGGCTTGATATACTCGACGCTTTA	ATACTTTAAGAAACAAAGGTCCAACGAATAATAAAGAACAAAGAGTAATGCGGATCCCCGGGTTAATTAA	ATCCCTTGGTGGCTCCACGCCGTTCAGATTTGAGACCTGAATTTGCAGAACGGATCCCCGGGTTAATTAA	TTTTCTTATACTCAGGAAACGTCACTTGGCTTGATATACTCGACGCTTTAGAATTCGAGCTCGTTTAAAC	1	YCL007C	1	YCL007C	0
YCL005W	LDB16	3	102874	103644	+	CATCAGCAACTGTAGGAGGAGAAAGCAGGTATATAACTAGCCGCAATATG	CCAGTGATGCGGACATCGTTAATATAAAGATTTTACGAAGGAATTCTAGG	ATTTCTATCATTCACTTGTTAGTGCATGAGAAGAAGTAATTGCAATATCA	CATCAGCAACTGTAGGAGGAGAAAGCAGGTATATAACTAGCCGCAATATGCGGATCCCCGGGTTAATTAA	CCAGTGATGCGGACATCGTTAATATAAAGATTTTACGAAGGAATTCTAGGCGGATCCCCGGGTTAATTAA	ATTTCTATCATTCACTTGTTAGTGCATGAGAAGAAGTAATTGCAATATCAGAATTCGAGCTCGTTTAAAC	0		0		0
YCL004W	PGS1,YCL003W,PEL1	3	103958	105523	+	CAGCTTGTCCATAATTGCTAATAGCATACTCAGGATAACATATATTAATG	ATGTTGGCACTGGTGTAAAGATAGCTACCTCCATTTTGGGTAAAAAACTT	TTTTATTTTTCCATATTTACAGGCGACATACTATGATAGAATAGAATCTA	CAGCTTGTCCATAATTGCTAATAGCATACTCAGGATAACATATATTAATGCGGATCCCCGGGTTAATTAA	ATGTTGGCACTGGTGTAAAGATAGCTACCTCCATTTTGGGTAAAAAACTTCGGATCCCCGGGTTAATTAA	TTTTATTTTTCCATATTTACAGGCGACATACTATGATAGAATAGAATCTAGAATTCGAGCTCGTTTAAAC	0		0		0
YCL002C	YCL002C	3	105696	106528	-	AGGAGAGGTTGAGGAGCCCTGCGAAGCAATTATATTGAATCATTCACATG	ACAATTTGTCACCTTATTGGTCATACTTTGTCAAGTTCAGTATGTTTACG	GAGCTGACCTTGTTATAGTTTTCCTTTTGGCAACCGTGGTTTCCGTCCTA	AGGAGAGGTTGAGGAGCCCTGCGAAGCAATTATATTGAATCATTCACATGCGGATCCCCGGGTTAATTAA	ACAATTTGTCACCTTATTGGTCATACTTTGTCAAGTTCAGTATGTTTACGCGGATCCCCGGGTTAATTAA	GAGCTGACCTTGTTATAGTTTTCCTTTTGGCAACCGTGGTTTCCGTCCTAGAATTCGAGCTCGTTTAAAC	0		0		0
YCL001W	RER1	3	106769	107335	+	ACTAAGTGTTACACGAAAGGCATAGAGTATCAAAAAAAGGAAGCAAGATG	GATATATACCCTTAGATATCGGTAAGAAGAAATATTCTCATTCTTCTAAC	TAAGATACGAATGTGTTCGTTGAATAGGTATGTGGAGTCAGGGTATATCA	ACTAAGTGTTACACGAAAGGCATAGAGTATCAAAAAAAGGAAGCAAGATGCGGATCCCCGGGTTAATTAA	GATATATACCCTTAGATATCGGTAAGAAGAAATATTCTCATTCTTCTAACCGGATCCCCGGGTTAATTAA	TAAGATACGAATGTGTTCGTTGAATAGGTATGTGGAGTCAGGGTATATCAGAATTCGAGCTCGTTTAAAC	0		0		0
YCL001W-A	YCL001W-A	3	107933	108394	+	CGAAGATAACGGTTACACAATTATCACGTTGATTCGTCAACTTAAAGATG	ACAAGAAAGAACGGATGACACAGTGGTTAGAAATTTCAATTTTGATGAAC	CAGCAGTGTCTTCGCATAAAATCCAGGGGAGCATAATATTATTATTCTCA	CGAAGATAACGGTTACACAATTATCACGTTGATTCGTCAACTTAAAGATGCGGATCCCCGGGTTAATTAA	ACAAGAAAGAACGGATGACACAGTGGTTAGAAATTTCAATTTTGATGAACCGGATCCCCGGGTTAATTAA	CAGCAGTGTCTTCGCATAAAATCCAGGGGAGCATAATATTATTATTCTCAGAATTCGAGCTCGTTTAAAC	0		0		0
YCL001W-B	YCL001W-B	3	108623	108877	+	ACTCTATGATAGTGCATAACACTAAAAAGTTGAAAGAATCCCGTATCATG	TACTCAGTACTTCAAAAATCACAGTGAGCAACTTGACAAACCAACAGATA	TTTGAAAAGTTCATCAAGGTATTGGATGGTATATTTTAAGACACAGCCTA	ACTCTATGATAGTGCATAACACTAAAAAGTTGAAAGAATCCCGTATCATGCGGATCCCCGGGTTAATTAA	TACTCAGTACTTCAAAAATCACAGTGAGCAACTTGACAAACCAACAGATACGGATCCCCGGGTTAATTAA	TTTGAAAAGTTCATCAAGGTATTGGATGGTATATTTTAAGACACAGCCTAGAATTCGAGCTCGTTTAAAC	0		0		0
YCR001W	YCR001W	3	110538	110852	+	GGAGTTCTACGTAAACCACTTAGAATGCAGTTTCTCTTCTAAATAACATG	TTCTAAAGAAAATATCCTTTTTTATTTATGTGAACTTCACTGTATACTTT	GTCAAGAAAAGTGATCGAGTAAAATAGAAGAAATCCACCGAAAGGTACTA	GGAGTTCTACGTAAACCACTTAGAATGCAGTTTCTCTTCTAAATAACATGCGGATCCCCGGGTTAATTAA	TTCTAAAGAAAATATCCTTTTTTATTTATGTGAACTTCACTGTATACTTTCGGATCCCCGGGTTAATTAA	GTCAAGAAAAGTGATCGAGTAAAATAGAAGAAATCCACCGAAAGGTACTAGAATTCGAGCTCGTTTAAAC	0		0		0
YCR002C	CDC10	3	112233	113201	-	ACAAGGCCAAGCCCCACGGTTACTACAAGCACTCTATAAATATATTAATG	ATGCGAATAGTCGTTCCTCAGCTCATATGTCTAGCAACGCCATTCAACGT	AATTCTTAATAACATAAGATATATAATCACCACCATTCTTATGAGATTCA	ACAAGGCCAAGCCCCACGGTTACTACAAGCACTCTATAAATATATTAATGCGGATCCCCGGGTTAATTAA	ATGCGAATAGTCGTTCCTCAGCTCATATGTCTAGCAACGCCATTCAACGTCGGATCCCCGGGTTAATTAA	AATTCTTAATAACATAAGATATATAATCACCACCATTCTTATGAGATTCAGAATTCGAGCTCGTTTAAAC	0		0		0
YCR003W	MRPL32	3	113473	114024	+	ACCTTAACTTGGAGACAAAAACACCAGGGAATATCAGCAAACAAACTATG	AAGATAAAGATAACTATTTGGAACGTCGCGTTCGGACTTTAAAAAAGGAC	CAGGCTTAAGTTTATTTAAAAAGGAAACCACTAGATGAAAGATGAGCCTA	ACCTTAACTTGGAGACAAAAACACCAGGGAATATCAGCAAACAAACTATGCGGATCCCCGGGTTAATTAA	AAGATAAAGATAACTATTTGGAACGTCGCGTTCGGACTTTAAAAAAGGACCGGATCCCCGGGTTAATTAA	CAGGCTTAAGTTTATTTAAAAAGGAAACCACTAGATGAAAGATGAGCCTAGAATTCGAGCTCGTTTAAAC	0		0		0
YCR004C	YCP4	3	114428	115171	-	AAAGAGAGTAAACAAAACAATACAGACTCAATTGAAGCACTATAAGAATG	CTGCAGAAAAGAAGGAGGACAAAGGATTATTATCCTGCTGTACTGTCATG	GAATTAATGTTAGTAAGAACTAAATATTAGACGCGAACTGTTGTTTCTTA	AAAGAGAGTAAACAAAACAATACAGACTCAATTGAAGCACTATAAGAATGCGGATCCCCGGGTTAATTAA	CTGCAGAAAAGAAGGAGGACAAAGGATTATTATCCTGCTGTACTGTCATGCGGATCCCCGGGTTAATTAA	GAATTAATGTTAGTAAGAACTAAATATTAGACGCGAACTGTTGTTTCTTAGAATTCGAGCTCGTTTAAAC	0		0		0
YCR005C	CIT2	3	115799	117181	-	ACAGGTTCTCAAAACTTTTTGTTTTAATAATACTAGTAACAAGAAAAATG	ATTCTACTGAGAAATACAAGGAATTGGTCAAAAACATTGAAAGCAAACTA	AGGAAAGAAAAATATGCAGAGGGGTGTAAAAGTAGGATGTAATCCAACTA	ACAGGTTCTCAAAACTTTTTGTTTTAATAATACTAGTAACAAGAAAAATGCGGATCCCCGGGTTAATTAA	ATTCTACTGAGAAATACAAGGAATTGGTCAAAAACATTGAAAGCAAACTACGGATCCCCGGGTTAATTAA	AGGAAAGAAAAATATGCAGAGGGGTGTAAAAGTAGGATGTAATCCAACTAGAATTCGAGCTCGTTTAAAC	0		0		0
YCR006C	YCR006C	3	117383	117856	-	ATTAAAAACAAGAAAATGTGTTGCCATTTCCGTAAAATGAATGGCCCATG	AAAACAATAACAATGGTAAGCGCAATTACCTTTTGAGCGTTACATTCGTA	TGGGCCCTTTTGAGAGCATGACTATCTTTAGATTAACGTCACCAATTTCA	ATTAAAAACAAGAAAATGTGTTGCCATTTCCGTAAAATGAATGGCCCATGCGGATCCCCGGGTTAATTAA	AAAACAATAACAATGGTAAGCGCAATTACCTTTTGAGCGTTACATTCGTACGGATCCCCGGGTTAATTAA	TGGGCCCTTTTGAGAGCATGACTATCTTTAGATTAACGTCACCAATTTCAGAATTCGAGCTCGTTTAAAC	0		0		0
YCR007C	YCR007C	3	120864	121583	-	CGGTTGTCTATACCATATCAAGACAAGAAACAAAACTCCGTATCTGCATG	AAGCACAACAGGAATATTGGAGAAAGCAATATCCTGACGCCGATATACCA	TACATCGCTCAGTATAAGTGCTAAATAAAATTATCAAGATTTATATTTCA	CGGTTGTCTATACCATATCAAGACAAGAAACAAAACTCCGTATCTGCATGCGGATCCCCGGGTTAATTAA	AAGCACAACAGGAATATTGGAGAAAGCAATATCCTGACGCCGATATACCACGGATCCCCGGGTTAATTAA	TACATCGCTCAGTATAAGTGCTAAATAAAATTATCAAGATTTATATTTCAGAATTCGAGCTCGTTTAAAC	0		0		0
YCR008W	SAT4,HAL4	3	123323	125134	+	AAAAAGTAATCAGATTTTATTTTATTTCGACATTACCCCTCAAATATATG	GTGAATGGGGAAGGGAGATAAAATGCTGCCATAATGGGCGCGCATTGAAA	ACCGAATTGTTCCAAAATATCGTGATATTTGAAAGTGAAGTACTCGTTTA	AAAAAGTAATCAGATTTTATTTTATTTCGACATTACCCCTCAAATATATGCGGATCCCCGGGTTAATTAA	GTGAATGGGGAAGGGAGATAAAATGCTGCCATAATGGGCGCGCATTGAAACGGATCCCCGGGTTAATTAA	ACCGAATTGTTCCAAAATATCGTGATATTTGAAAGTGAAGTACTCGTTTAGAATTCGAGCTCGTTTAAAC	0		0		0
YCR009C	RVS161,SPE161,FUS7,END6	3	125598	126395	-	AACTATACAAATCCTATTATAAGAAGCCAGAAGAAAGCTGATACAAGATG	AACTATTAGGACAAATGACAAGCCTAGATATTTGTGCGCTCGGGATAAAA	GAAAGAAACATAAATGACCGTAAAAAACTAAAGGCAAAAGCATTAATTTA	AACTATACAAATCCTATTATAAGAAGCCAGAAGAAAGCTGATACAAGATGCGGATCCCCGGGTTAATTAA	AACTATTAGGACAAATGACAAGCCTAGATATTTGTGCGCTCGGGATAAAACGGATCCCCGGGTTAATTAA	GAAAGAAACATAAATGACCGTAAAAAACTAAAGGCAAAAGCATTAATTTAGAATTCGAGCTCGTTTAAAC	0		0		0
YCR010C	ADY2,ATO1	3	127126	127977	-	AGATATAACTAAACAACCACAAAACAACTCATATACAAACAAATAATATG	ATGTACTGGCTCGTCCATTCCCATTACCATCTACTGAAAGGGTAATCTTT	CTACTCTTTTTTATTTCAATAGTTCTCGTTATTAGTAGGTCGTGCTCTTA	AGATATAACTAAACAACCACAAAACAACTCATATACAAACAAATAATATGCGGATCCCCGGGTTAATTAA	ATGTACTGGCTCGTCCATTCCCATTACCATCTACTGAAAGGGTAATCTTTCGGATCCCCGGGTTAATTAA	CTACTCTTTTTTATTTCAATAGTTCTCGTTATTAGTAGGTCGTGCTCTTAGAATTCGAGCTCGTTTAAAC	0		0		0
YCR011C	ADP1	3	128577	131726	-	TACAGAAACTTGCACACTAAAAATACACAACTAAAAGCAATTACAGTATG	TTTTAATAATGGGGTATCTAGCCCTTAAGTGGATAGTTGTGGAACAAAAG	AAATTATTATTTCTTATGTAAAAGAAGAGACTATATACGACGCCTATCTA	TACAGAAACTTGCACACTAAAAATACACAACTAAAAGCAATTACAGTATGCGGATCCCCGGGTTAATTAA	TTTTAATAATGGGGTATCTAGCCCTTAAGTGGATAGTTGTGGAACAAAAGCGGATCCCCGGGTTAATTAA	AAATTATTATTTCTTATGTAAAAGAAGAGACTATATACGACGCCTATCTAGAATTCGAGCTCGTTTAAAC	0		0		0
YCR012W	PGK1	3	132599	133849	+	GATCATCAAGGAAGTAATTATCTACTTTTTACAACAAATATAAAACAATG	TATTGGAAGGTAAGGAATTGCCAGGTGTTGCTTTCTTATCCGAAAAGAAA	AAAGAGAAAAGAAAAAAATTGATCTATCGATTTCAATTCAATTCAATTTA	GATCATCAAGGAAGTAATTATCTACTTTTTACAACAAATATAAAACAATGCGGATCCCCGGGTTAATTAA	TATTGGAAGGTAAGGAATTGCCAGGTGTTGCTTTCTTATCCGAAAAGAAACGGATCCCCGGGTTAATTAA	AAAGAGAAAAGAAAAAAATTGATCTATCGATTTCAATTCAATTCAATTTAGAATTCGAGCTCGTTTAAAC	1	YCR013C	1	YCR013C	0
YCR013C	YCR013C	3	133255	133902	-	TAAAAAATATTCAAAAAATAAAATAAACTATTATTTTAGCGTAAAGGATG	CACCACCAATGATGATAGAGTCGACCTTGTCCAACAAGTTGTCAATCAAT	AGACCATTCTTGGCCATCTTAGGTGGTGCCAAGGTTGCTGACAAGATTCA	TAAAAAATATTCAAAAAATAAAATAAACTATTATTTTAGCGTAAAGGATGCGGATCCCCGGGTTAATTAA	CACCACCAATGATGATAGAGTCGACCTTGTCCAACAAGTTGTCAATCAATCGGATCCCCGGGTTAATTAA	AGACCATTCTTGGCCATCTTAGGTGGTGCCAAGGTTGCTGACAAGATTCAGAATTCGAGCTCGTTTAAAC	1	YCR012W	1	YCR012W	0
YCR014C	POL4,POLX	3	134038	135786	-	TGATAATAAGTAAAGGATAAACATGCGACCTGTTAGACAAATCGCACATG	AATACGCTGAACCCGAACATAGAAATATCGAATGGGAAAAAAAAACTGCA	TTATTAAGATTTTTATTAAAAAAAAATTCGCTCCTCTTTTAATGCCTTTA	TGATAATAAGTAAAGGATAAACATGCGACCTGTTAGACAAATCGCACATGCGGATCCCCGGGTTAATTAA	AATACGCTGAACCCGAACATAGAAATATCGAATGGGAAAAAAAAACTGCACGGATCCCCGGGTTAATTAA	TTATTAAGATTTTTATTAAAAAAAAATTCGCTCCTCTTTTAATGCCTTTAGAATTCGAGCTCGTTTAAAC	0		0		0
YCR015C	YCR015C	3	136070	137023	-	CCAATGCATTTAACAATTGCAGTAACCAGAAGCGAACAGTGGAGGATATG	TGAAATCCTGGGACTCTTTAAAAGATTTGATCATGCAGGTAACAAAAATG	CAACGTCCTGGTTATATAAATTTGAATATACAGGATTTCATCCGTTTCTA	CCAATGCATTTAACAATTGCAGTAACCAGAAGCGAACAGTGGAGGATATGCGGATCCCCGGGTTAATTAA	TGAAATCCTGGGACTCTTTAAAAGATTTGATCATGCAGGTAACAAAAATGCGGATCCCCGGGTTAATTAA	CAACGTCCTGGTTATATAAATTTGAATATACAGGATTTCATCCGTTTCTAGAATTCGAGCTCGTTTAAAC	0		0		0
YCR016W	YCR016W	3	138567	139439	+	CTTTATCGACAAATTACAAGCAGAAGAAACATTCACTTCACAATTAAATG	AGAATGATGACTCGGAGCAGATAGAACTTAAGAATTTCTTCGTTGATGTT	CACAGTAAAATATATACTACAACTGAACAACGTTGTTGAACTCTATGTTA	CTTTATCGACAAATTACAAGCAGAAGAAACATTCACTTCACAATTAAATGCGGATCCCCGGGTTAATTAA	AGAATGATGACTCGGAGCAGATAGAACTTAAGAATTTCTTCGTTGATGTTCGGATCCCCGGGTTAATTAA	CACAGTAAAATATATACTACAACTGAACAACGTTGTTGAACTCTATGTTAGAATTCGAGCTCGTTTAAAC	0		0		0
YCR017C	CWH43	3	139706	142567	-	CTCGAGGAATAAGTAACCAGGAATACAGAAGGTATCCACCGCCAGTTATG	GTGAGAGGGGTCACTTCTACCATGTTTTTGATGAGCCACGTTATTACTTA	TACACACAATGTGATTACACTGATTTATAAAACCACCTTACGGCCTCTTA	CTCGAGGAATAAGTAACCAGGAATACAGAAGGTATCCACCGCCAGTTATGCGGATCCCCGGGTTAATTAA	GTGAGAGGGGTCACTTCTACCATGTTTTTGATGAGCCACGTTATTACTTACGGATCCCCGGGTTAATTAA	TACACACAATGTGATTACACTGATTTATAAAACCACCTTACGGCCTCTTAGAATTCGAGCTCGTTTAAAC	0		0		0
YCR018C	SRD1	3	143171	146210	-	TGTTAAGAGGTTGCTAGGTAAATAACCAGACATTTACTATTGNNNNNNNN	ATGAAAAAAAAAGGCAAGCAGCAGATAAAAGGATAGATCGAAACAATCCA	TCCTAGTGGAAAAATATCATCTATGCGGTGAAAGAATTAAATAGATACTA	TGTTAAGAGGTTGCTAGGTAAATAACCAGACATTTACTATTGNNNNNATGCGGATCCCCGGGTTAATTAA	ATGAAAAAAAAAGGCAAGCAGCAGATAAAAGGATAGATCGAAACAATCCACGGATCCCCGGGTTAATTAA	TCCTAGTGGAAAAATATCATCTATGCGGTGAAAGAATTAAATAGATACTAGAATTCGAGCTCGTTTAAAC	0		0		0
YCR018C-A	YCR018C-A	3	157028	158301	-	NNNNNNNNNNNNNNNNNNNNNNNNNNNNNNNNNNNNNNNNNNTTCTGATG	TTATCAATCCTTGCACTTCAGCTTCCTCTAACTTCGATGACAGCTTCTCA	NNNNNNTCAATATATTATCATATACGGTGTTAAGATGATGACATAAGTTA	NNNNNNNNNNNNNNNNNNNNNNNNNNNNNNNNNNNNNNNNNNTTCTGATGCGGATCCCCGGGTTAATTAA	TTATCAATCCTTGCACTTCAGCTTCCTCTAACTTCGATGACAGCTTCTCACGGATCCCCGGGTTAATTAA	NNNNNNTCAATATATTATCATATACGGTGTTAAGATGATGACATAAGTTAGAATTCGAGCTCGTTTAAAC	0		0		0
YCR019W	MAK32	3	162498	163589	+	ATTTGATTTAAGAAGTTTACTGTTCTAAGAAAATAAAGAACGTGATAATG	AGTCCGGTCTTCAATATAATATAAACGATCTTTACAAAAGTCTAACACGA	ATGTATATTTTTGCAGAAAAATAAGAGCAATGAACAAGCTGATATGATCA	ATTTGATTTAAGAAGTTTACTGTTCTAAGAAAATAAAGAACGTGATAATGCGGATCCCCGGGTTAATTAA	AGTCCGGTCTTCAATATAATATAAACGATCTTTACAAAAGTCTAACACGACGGATCCCCGGGTTAATTAA	ATGTATATTTTTGCAGAAAAATAAGAGCAATGAACAAGCTGATATGATCAGAATTCGAGCTCGTTTAAAC	0		0		0
YCR020C	PET18,HIT2	3	163673	164320	-	TTTAGCGCAAATAATAACAATATCAACAATATCTGCAAGGAAGAACAATG	TGAAGGTTTCACAGTTCGAGTTCGAATTTTTTGAATCTTGTTACAACGCC	AAAATATACATATATATATATAAGTAAGTGTTATATACTACTTGAGATTA	TTTAGCGCAAATAATAACAATATCAACAATATCTGCAAGGAAGAACAATGCGGATCCCCGGGTTAATTAA	TGAAGGTTTCACAGTTCGAGTTCGAATTTTTTGAATCTTGTTACAACGCCCGGATCCCCGGGTTAATTAA	AAAATATACATATATATATATAAGTAAGTGTTATATACTACTTGAGATTAGAATTCGAGCTCGTTTAAAC	0		0		0
YCR020C-A	MAK31,SMX1,LSM9	3	164491	164757	-	GGGTGAAGATAGTCTTCAACAAACTTAGTAAGGGGCACCAAAGCGTCATG	TTCTGCAGGAGCTTACTGCGAATAAAGTTGAATTGATGGCTAATATTGTT	TTTTTGCCAAGCAATTGTTACTATGGAAACTATTAGAACCATATGCGCTA	GGGTGAAGATAGTCTTCAACAAACTTAGTAAGGGGCACCAAAGCGTCATGCGGATCCCCGGGTTAATTAA	TTCTGCAGGAGCTTACTGCGAATAAAGTTGAATTGATGGCTAATATTGTTCGGATCCCCGGGTTAATTAA	TTTTTGCCAAGCAATTGTTACTATGGAAACTATTAGAACCATATGCGCTAGAATTCGAGCTCGTTTAAAC	0		0		0
YCR020W-B	HTL1	3	164981	165217	+	TAGAACGAAAGGATTGTGTTATTTAGAACAGAGTATCAGTATATCGTATG	TGGAAGAAATGAAAAAAATGCTCGATGCTTTGAAAAATGAAAGGAAAAAG	TTCACATTCAATATTTTGTAGCTTACAATTGTGAATGTTGCGTTTTCCTA	TAGAACGAAAGGATTGTGTTATTTAGAACAGAGTATCAGTATATCGTATGCGGATCCCCGGGTTAATTAA	TGGAAGAAATGAAAAAAATGCTCGATGCTTTGAAAAATGAAAGGAAAAAGCGGATCCCCGGGTTAATTAA	TTCACATTCAATATTTTGTAGCTTACAATTGTGAATGTTGCGTTTTCCTAGAATTCGAGCTCGTTTAAAC	0		0		0
YCR021C	HSP30,YRO1	3	165770	166768	-	GTTTGAGACTTTAATATCTTTTGATTACTAAAAACAACAAATTTCAAATG	CAATCCACGAACCCGAACCTGAAGCAGAGCAAGCTGTCGAAGATACTGCT	TTTGAAATGTGTTAAGCAAAGAATGATTAAGACAATCTCAAGCTGCTCTA	GTTTGAGACTTTAATATCTTTTGATTACTAAAAACAACAAATTTCAAATGCGGATCCCCGGGTTAATTAA	CAATCCACGAACCCGAACCTGAAGCAGAGCAAGCTGTCGAAGATACTGCTCGGATCCCCGGGTTAATTAA	TTTGAAATGTGTTAAGCAAAGAATGATTAAGACAATCTCAAGCTGCTCTAGAATTCGAGCTCGTTTAAAC	0		0		0
YCR022C	YCR022C	3	167082	167426	-	CGTTTTGCATAAGTAAGAATAACTACTTGTGCAGGGTGCCGAAAGGGATG	CTTCGTTATTTCATCATCCCTTTCTGCTATGGCAAGGACAAGTTTTTTTC	TATGAAAACTTTGGCCAATTAGGGAGAGGAAAGTTTTCGATGAGATGCTA	CGTTTTGCATAAGTAAGAATAACTACTTGTGCAGGGTGCCGAAAGGGATGCGGATCCCCGGGTTAATTAA	CTTCGTTATTTCATCATCCCTTTCTGCTATGGCAAGGACAAGTTTTTTTCCGGATCCCCGGGTTAATTAA	TATGAAAACTTTGGCCAATTAGGGAGAGGAAAGTTTTCGATGAGATGCTAGAATTCGAGCTCGTTTAAAC	0		0		0
YCR023C	YCR023C	3	168199	170034	-	AAGGAACTAGGAAGTGGTAAGCATATGAACACACGAATATAAAAGATATG	TGGCTCATCGATCTAGTTTAAGCAGCTTAAGTAACCAACGCTGTACCACA	TTTTTTTATTAGATATCCTTTTTGCAAGCCTTCTGAAAAAAAATTTCTCA	AAGGAACTAGGAAGTGGTAAGCATATGAACACACGAATATAAAAGATATGCGGATCCCCGGGTTAATTAA	TGGCTCATCGATCTAGTTTAAGCAGCTTAAGTAACCAACGCTGTACCACACGGATCCCCGGGTTAATTAA	TTTTTTTATTAGATATCCTTTTTGCAAGCCTTCTGAAAAAAAATTTCTCAGAATTCGAGCTCGTTTAAAC	0		0		0
YCR024C	SLM5	3	170405	171883	-	CGCTTACTAAGAGAGAAAGAAAGAGAACAAGCGAATACAAACAGCTAATG	TAAAGGATGCCATACCCTTTTATAGAACATCTGCAGAATCCATCGATTTT	TGAACAGTGAGTAAATACATAGAAGGAGATAAGAAACAAATGGAATATCA	CGCTTACTAAGAGAGAAAGAAAGAGAACAAGCGAATACAAACAGCTAATGCGGATCCCCGGGTTAATTAA	TAAAGGATGCCATACCCTTTTATAGAACATCTGCAGAATCCATCGATTTTCGGATCCCCGGGTTAATTAA	TGAACAGTGAGTAAATACATAGAAGGAGATAAGAAACAAATGGAATATCAGAATTCGAGCTCGTTTAAAC	0		0		0
YCR024C-B	YCR024C-B	3	172260	172525	-	CCCTTCATCTTTGTTTATATCCATTCTAGAACATGAATTAGACTACTATG	TCCAAATTGTTCGCTTTTTTCCTTTTATCACTATTATTTTTTTCCACTCT	AGTTATCATGAGGAGTCATCAGCCAGACTTAACAATCACACACATTGTTA	CCCTTCATCTTTGTTTATATCCATTCTAGAACATGAATTAGACTACTATGCGGATCCCCGGGTTAATTAA	TCCAAATTGTTCGCTTTTTTCCTTTTATCACTATTATTTTTTTCCACTCTCGGATCCCCGGGTTAATTAA	AGTTATCATGAGGAGTCATCAGCCAGACTTAACAATCACACACATTGTTAGAATTCGAGCTCGTTTAAAC	0		0		0
YCR024C-A	PMP1	3	172605	172727	-	TTGTTTGTTTCTCCTCTTCCCATTTCAGCACTTTTAATCTATCATAAATG	CCATTATCTACAGAAAATGGCAAGCTAGACAAAGAGGATTGCAAAGATTC	AACAAAGATGAAGGGGACAGGAAATAAAATGGCTCGCTCCGCCCTTTTTA	TTGTTTGTTTCTCCTCTTCCCATTTCAGCACTTTTAATCTATCATAAATGCGGATCCCCGGGTTAATTAA	CCATTATCTACAGAAAATGGCAAGCTAGACAAAGAGGATTGCAAAGATTCCGGATCCCCGGGTTAATTAA	AACAAAGATGAAGGGGACAGGAAATAAAATGGCTCGCTCCGCCCTTTTTAGAATTCGAGCTCGTTTAAAC	0		0		0
YCR025C	YCR025C	3	173108	173518	-	ACAAGCTGAAACTAGGCGTGTTAACTCTTTCCTAAACGAGGAGGTTTATG	CAAACAGAAAGCAGAAAGCAGAAAGATGTCAATATAGACTTGTCACTGCG	AAAAAAAATGGGAAATTATTATCGGAAAAAATTGAAGCTATCTTCTATTA	ACAAGCTGAAACTAGGCGTGTTAACTCTTTCCTAAACGAGGAGGTTTATGCGGATCCCCGGGTTAATTAA	CAAACAGAAAGCAGAAAGCAGAAAGATGTCAATATAGACTTGTCACTGCGCGGATCCCCGGGTTAATTAA	AAAAAAAATGGGAAATTATTATCGGAAAAAATTGAAGCTATCTTCTATTAGAATTCGAGCTCGTTTAAAC	0		0		0
YCR026C	NPP1	3	173773	176001	-	GTAATTACATATATCTGAAAAGAGGTACAGTATAACACTCTCTATAGATG	TCATTGACGACATAATTGACAGCATCGACGATTTAGTCGATTCTGATACC	ACAAGGATGCGTCTTTTATTTCATAACGCGGTTGTCCCACCTTAAGCTTA	GTAATTACATATATCTGAAAAGAGGTACAGTATAACACTCTCTATAGATGCGGATCCCCGGGTTAATTAA	TCATTGACGACATAATTGACAGCATCGACGATTTAGTCGATTCTGATACCCGGATCCCCGGGTTAATTAA	ACAAGGATGCGTCTTTTATTTCATAACGCGGTTGTCCCACCTTAAGCTTAGAATTCGAGCTCGTTTAAAC	0		0		0
YCR027C	RHB1,RSG1	3	177032	177661	-	AACAGTTTTATTGGGGCACGGCGAGAAAAGATATAACCTGTGACATAATG	AAGGAACTCTGGGGCTTGATGCCGAAAATAATAATAAATGTTCTATAATG	GCTTTCCTACTAATAAAACCAATGATATCCTAGGGACGCTCGAGTTTTCA	AACAGTTTTATTGGGGCACGGCGAGAAAAGATATAACCTGTGACATAATGCGGATCCCCGGGTTAATTAA	AAGGAACTCTGGGGCTTGATGCCGAAAATAATAATAAATGTTCTATAATGCGGATCCCCGGGTTAATTAA	GCTTTCCTACTAATAAAACCAATGATATCCTAGGGACGCTCGAGTTTTCAGAATTCGAGCTCGTTTAAAC	0		0		0
YCR028C	FEN2	3	180548	182086	-	GAAGCTGTTTTCAGAATTTTTGATTGGAGAGAGCCTGGGCCTAAGTCATG	AAGTTGAACTTCATAATGAGGAAATGGCCGAAATTTCAAATCCTTTCCGA	CATTACCATCAACAGGACCAATGAATAGCTAAAAGAATCGAATGTATCTA	GAAGCTGTTTTCAGAATTTTTGATTGGAGAGAGCCTGGGCCTAAGTCATGCGGATCCCCGGGTTAATTAA	AAGTTGAACTTCATAATGAGGAAATGGCCGAAATTTCAAATCCTTTCCGACGGATCCCCGGGTTAATTAA	CATTACCATCAACAGGACCAATGAATAGCTAAAAGAATCGAATGTATCTAGAATTCGAGCTCGTTTAAAC	0		0		0
YCR028C-A	RIM1	3	182612	183102	-	TGTCCTTGACAAATACAAAACAAACAAAAATCCACTAATCCATTGTAATG	GGAAGAAATTAGAAGATGCTGAGGGCCAAGAAAATGCTGCTTCTTCAGAA	AAAAAATATCGAGGAAGAGTCGAAATAAGCAAGCGTAAATATTACAATTA	TGTCCTTGACAAATACAAAACAAACAAAAATCCACTAATCCATTGTAATGCGGATCCCCGGGTTAATTAA	GGAAGAAATTAGAAGATGCTGAGGGCCAAGAAAATGCTGCTTCTTCAGAACGGATCCCCGGGTTAATTAA	AAAAAATATCGAGGAAGAGTCGAAATAAGCAAGCGTAAATATTACAATTAGAATTCGAGCTCGTTTAAAC	0		0		0
YCR030C	SYP1,YCR029C-A	3	185243	187855	-	GTCGTATTGAAGCAAGCTTATTTGAAAATTGCGAATAATCACCTCTCATG	ATGTAAACACAAAAAGAACTTTGACCACTGGTAACTACCATGGTCTCGCT	AAACAAAAGAACAATTAATATTGAAAAATAGAAGCATAGCAGAAATATCA	GTCGTATTGAAGCAAGCTTATTTGAAAATTGCGAATAATCACCTCTCATGCGGATCCCCGGGTTAATTAA	ATGTAAACACAAAAAGAACTTTGACCACTGGTAACTACCATGGTCTCGCTCGGATCCCCGGGTTAATTAA	AAACAAAAGAACAATTAATATTGAAAAATAGAAGCATAGCAGAAATATCAGAATTCGAGCTCGTTTAAAC	0		0		0
YCR031C	RPS14A,RPL59,CRY1	3	188917	189637	-	GATTCTATTTTAAACCCAAGGAGAGTAAGAAACCACAAGAACCCGCCATG	TTCCATCTGACTCCACCAGAAAGAAGGGTGGTAGAAGAGGTAGAAGATTA	TAACTGTAAAAAATAATACGGCAATACAAGTACAATACATGCATAACTCA	GATTCTATTTTAAACCCAAGGAGAGTAAGAAACCACAAGAACCCGCCATGCGGATCCCCGGGTTAATTAA	TTCCATCTGACTCCACCAGAAAGAAGGGTGGTAGAAGAGGTAGAAGATTACGGATCCCCGGGTTAATTAA	TAACTGTAAAAAATAATACGGCAATACAAGTACAATACATGCATAACTCAGAATTCGAGCTCGTTTAAAC	0		0		0
YCR032W	BPH1	3	190937	197440	+	CCAATTGGTTCTTTCTCCTTTCTGCCAAAAAAAAACACAATACGGATATG	AGATAGAAGTGATTGCGGGAACATTAGATGGCAGATTAGCTATTTGGTAC	AACTACAAAAATTGAATCATTTAAAGAAAGGCGTTACGATGTGATGCCTA	CCAATTGGTTCTTTCTCCTTTCTGCCAAAAAAAAACACAATACGGATATGCGGATCCCCGGGTTAATTAA	AGATAGAAGTGATTGCGGGAACATTAGATGGCAGATTAGCTATTTGGTACCGGATCCCCGGGTTAATTAA	AACTACAAAAATTGAATCATTTAAAGAAAGGCGTTACGATGTGATGCCTAGAATTCGAGCTCGTTTAAAC	0		0		0
YCR033W	SNT1	3	197906	201586	+	TACTAACTTGTGCATAGAACAGCAAACAGAAACAAAGCGTAAGAAACATG	CCGCGCCAGATGCAATGAGCAGTTTTTTATCTAAAAAGGAAAATAATAAT	GATGGAAAAGAAGTAGAGCATATGTATTGCCCGTCTCAGCCGTTTGTTCA	TACTAACTTGTGCATAGAACAGCAAACAGAAACAAAGCGTAAGAAACATGCGGATCCCCGGGTTAATTAA	CCGCGCCAGATGCAATGAGCAGTTTTTTATCTAAAAAGGAAAATAATAATCGGATCCCCGGGTTAATTAA	GATGGAAAAGAAGTAGAGCATATGTATTGCCCGTCTCAGCCGTTTGTTCAGAATTCGAGCTCGTTTAAAC	0		0		0
YCR034W	FEN1,VBM2,GNS1,ELO2	3	202009	203052	+	TTTGTACAAAGTGAAAAGGTTGAACTAATTATCTTCGTCTAGAAGCCATG	ACGTTCCTACTCCATCTCCATCACCAAAACCTCAACACAGAAGAAAAAGG	CGAATATACGAAAGTTGAATACTTAAATTCTTTCAAAGATTTTACACTTA	TTTGTACAAAGTGAAAAGGTTGAACTAATTATCTTCGTCTAGAAGCCATGCGGATCCCCGGGTTAATTAA	ACGTTCCTACTCCATCTCCATCACCAAAACCTCAACACAGAAGAAAAAGGCGGATCCCCGGGTTAATTAA	CGAATATACGAAAGTTGAATACTTAAATTCTTTCAAAGATTTTACACTTAGAATTCGAGCTCGTTTAAAC	0		0		0
YCR035C	RRP43	3	203251	204435	-	TACACAAATAAGTTTGACAGTAGTTTCACAGGCATCTAATATTGGAAATG	TGTTGTTATCTAGGGTTAGAGCGGACGATTTGTCAACAAGATTTAACATA	TTTTCCGTTTCCTTTCGACAGTCATCAGATAATTTTATCCGAGTCTTTTA	TACACAAATAAGTTTGACAGTAGTTTCACAGGCATCTAATATTGGAAATGCGGATCCCCGGGTTAATTAA	TGTTGTTATCTAGGGTTAGAGCGGACGATTTGTCAACAAGATTTAACATACGGATCCCCGGGTTAATTAA	TTTTCCGTTTCCTTTCGACAGTCATCAGATAATTTTATCCGAGTCTTTTAGAATTCGAGCTCGTTTAAAC	0		0		0
YCR036W	RBK1	3	204714	205715	+	GATGTTTGTTGTCTTTCATCCCAAAGTTCCAACAGCATATTTCAAAGATG	AAGGTGCTGCTGAAAGCATGCCACTGTATAAAGATGTTCAGAAAGATGCA	CGAAAACTAAAATTTAACAAACTAAAAGTAAAAAATTGCAGTAGATTTTA	GATGTTTGTTGTCTTTCATCCCAAAGTTCCAACAGCATATTTCAAAGATGCGGATCCCCGGGTTAATTAA	AAGGTGCTGCTGAAAGCATGCCACTGTATAAAGATGTTCAGAAAGATGCACGGATCCCCGGGTTAATTAA	CGAAAACTAAAATTTAACAAACTAAAAGTAAAAAATTGCAGTAGATTTTAGAATTCGAGCTCGTTTAAAC	0		0		0
YCR037C	PHO87	3	205831	208602	-	AAGGTGCAGCAAAACTACGGTAAAGGCGGCTATTATTGTGCCTCGAAATG	TAATTACTCTCGGTTATGGTATTAGTTCTTCCGTCTTAAAAGGTAGCACT	AGGTACAAAGAATGCAGTAATAAGAAATGTAATTACATGAGGGCAGTTTA	AAGGTGCAGCAAAACTACGGTAAAGGCGGCTATTATTGTGCCTCGAAATGCGGATCCCCGGGTTAATTAA	TAATTACTCTCGGTTATGGTATTAGTTCTTCCGTCTTAAAAGGTAGCACTCGGATCCCCGGGTTAATTAA	AGGTACAAAGAATGCAGTAATAAGAAATGTAATTACATGAGGGCAGTTTAGAATTCGAGCTCGTTTAAAC	0		0		0
YCR038C	BUD5	3	209038	210966	-	GAATTAGCGGACCTCTTGAGCGGTGAGCCTCTGGCAAAGAAGAAAGAATG	ACAAAGACAGGGCGTATCAAGTCAGTATAGCTAAGGTTCCAAGGCTTACC	CGTACAAGAAGCAAAAGGAAGTCATCTTTCTTTGAACAGTTCTGTTTTTA	GAATTAGCGGACCTCTTGAGCGGTGAGCCTCTGGCAAAGAAGAAAGAATGCGGATCCCCGGGTTAATTAA	ACAAAGACAGGGCGTATCAAGTCAGTATAGCTAAGGTTCCAAGGCTTACCCGGATCCCCGGGTTAATTAA	CGTACAAGAAGCAAAAGGAAGTCATCTTTCTTTGAACAGTTCTGTTTTTAGAATTCGAGCTCGTTTAAAC	2	YCR038W-A;YCR039C	2	YCR038W-A;YCR039C	0
YCR038W-A	YCR038W-A	3	210710	210835	+	GGATTTTTTTTGGGACGATATTGTCATTATAGGGCAGTGTGTGACTTATG	CCTGGATAGCGAAGCGTGCGGTTACAAATAGGTCGTCTTGTTCAAGAAGG	TCCTCAGACACTACTAAGATGTTTGTACTGATAGATAATGTCCTCGCCTA	GGATTTTTTTTGGGACGATATTGTCATTATAGGGCAGTGTGTGACTTATGCGGATCCCCGGGTTAATTAA	CCTGGATAGCGAAGCGTGCGGTTACAAATAGGTCGTCTTGTTCAAGAAGGCGGATCCCCGGGTTAATTAA	TCCTCAGACACTACTAAGATGTTTGTACTGATAGATAATGTCCTCGCCTAGAATTCGAGCTCGTTTAAAC	1	YCR038C	1	YCR038C	0
YCR039C	MATALPHA2,ALPHA2	3	210963	211600	-	TTTCCGCCATACTACAAATACCATCCATGTTGTCCTTCTTGATTTTCATT	CAGAATTAGCGGACCTCTTGAGCGGTGAGCCTCTGGCAAAGAAGAAAGAA	TATATATATATATTCTACACAGATATATACATATTTGTTTTTCGGGCTCA	TTTCCGCCATACTACAAATACCATCCATGTTGTCCTTCTTGATTTTCATGCGGATCCCCGGGTTAATTAA	CAGAATTAGCGGACCTCTTGAGCGGTGAGCCTCTGGCAAAGAAGAAAGAACGGATCCCCGGGTTAATTAA	TATATATATATATTCTACACAGATATATACATATTTGTTTTTCGGGCTCAGAATTCGAGCTCGTTTAAAC	2	YCR038C;YCR040W	2	YCR038C;YCR040W	0
YCR040W	MATALPHA1,ALPHA1	3	211600	211832	+	AAACTTCCAAAAAGGAAAAGTAAAACAATACATCTCCTTATATCAAATGA	AAGTACGTGGTGACGGATATTGGGAAGATGTGTTTGTACATTTGGCCTTA	CAACATTCAGTACTCGAAAGATAAACAACCTCCGCCACGACCACACTCTA	AAACTTCCAAAAAGGAAAAGTAAAACAATACATCTCCTTATATCAAAATGCGGATCCCCGGGTTAATTAA	AAGTACGTGGTGACGGATATTGGGAAGATGTGTTTGTACATTTGGCCTTACGGATCCCCGGGTTAATTAA	CAACATTCAGTACTCGAAAGATAAACAACCTCCGCCACGACCACACTCTAGAATTCGAGCTCGTTTAAAC	2	YCR039C;YCR041W	2	YCR039C;YCR041W	0
YCR041W	YCR041W	3	211774	212106	+	TTTTATAAACCCTGGTTTTGGTTTTGTAGAGTGGTTGACGAATAATTATG	TCTTTGTTCTTATCTTAACCATAAACGATCTTGATGTGACTTTTGTAATT	CCTAGAGTAATGGTGCATTTGTCATCCGTCCCGTATAGCCAATTCGTTCA	TTTTATAAACCCTGGTTTTGGTTTTGTAGAGTGGTTGACGAATAATTATGCGGATCCCCGGGTTAATTAA	TCTTTGTTCTTATCTTAACCATAAACGATCTTGATGTGACTTTTGTAATTCGGATCCCCGGGTTAATTAA	CCTAGAGTAATGGTGCATTTGTCATCCGTCCCGTATAGCCAATTCGTTCAGAATTCGAGCTCGTTTAAAC	2	YCR040W;YCR042C	2	YCR040W;YCR042C	0
YCR042C	TAF2,TSM1,TAF150	3	212037	216260	-	AGTTTTGGACAGTGAAGAGGTGACAACAGGATAAATAGGTGGACTTCATG	CATCAAGATCGTTTATGGTTAAGATAAGAACAAAGAATGATGCTAAGAAT	CTATGTATTTGTATAAAATATGATATTACTCAGACTCAAGCAAACAATCA	AGTTTTGGACAGTGAAGAGGTGACAACAGGATAAATAGGTGGACTTCATGCGGATCCCCGGGTTAATTAA	CATCAAGATCGTTTATGGTTAAGATAAGAACAAAGAATGATGCTAAGAATCGGATCCCCGGGTTAATTAA	CTATGTATTTGTATAAAATATGATATTACTCAGACTCAAGCAAACAATCAGAATTCGAGCTCGTTTAAAC	1	YCR041W	1	YCR041W	0
YCR043C	YCR043C	3	217124	217507	-	GGGCAACAGTAGGCAGTGAAAGCGCTCTTAACGTACTTTGGCAAAGGATG	ACGACTTTAAGATGGAAGGAGGTGATTTAGAGTACCAACATGTAAAGATC	TTCCTTCGAAACCAGCAGTAATAAGTCGTCCTGAGAACGATGTAGATTTA	GGGCAACAGTAGGCAGTGAAAGCGCTCTTAACGTACTTTGGCAAAGGATGCGGATCCCCGGGTTAATTAA	ACGACTTTAAGATGGAAGGAGGTGATTTAGAGTACCAACATGTAAAGATCCGGATCCCCGGGTTAATTAA	TTCCTTCGAAACCAGCAGTAATAAGTCGTCCTGAGAACGATGTAGATTTAGAATTCGAGCTCGTTTAAAC	0		0		0
YCR044C	PER1,COS16	3	217740	218813	-	GAAACCATACCCTTCGGGAGAAAAGAAACAGAAGTGTGGCAAGAAATATG	ACGACTTTTTCCTCGAGGATTATGCCTATTGGGGTAATAGACAATTGTAC	ACATATATAACTATTATTCATGATAGTAAACAGGTGAATTAAGATATTTA	GAAACCATACCCTTCGGGAGAAAAGAAACAGAAGTGTGGCAAGAAATATGCGGATCCCCGGGTTAATTAA	ACGACTTTTTCCTCGAGGATTATGCCTATTGGGGTAATAGACAATTGTACCGGATCCCCGGGTTAATTAA	ACATATATAACTATTATTCATGATAGTAAACAGGTGAATTAAGATATTTAGAATTCGAGCTCGTTTAAAC	0		0		0
YCR045C	YCR045C	3	218998	220473	-	GACATCCTCTAACATCCGCCAAGAAAAACAGCAAAAAAACACTGGTCATG	TACCTCTTGGTGAGATTCGATTGAAGAGGCGTGATTTTATGAAAAATTTG	GACATGACATTATGCAATAATTTATTTATGAGAGAAAGAGAAAAACACTA	GACATCCTCTAACATCCGCCAAGAAAAACAGCAAAAAAACACTGGTCATGCGGATCCCCGGGTTAATTAA	TACCTCTTGGTGAGATTCGATTGAAGAGGCGTGATTTTATGAAAAATTTGCGGATCCCCGGGTTAATTAA	GACATGACATTATGCAATAATTTATTTATGAGAGAAAGAGAAAAACACTAGAATTCGAGCTCGTTTAAAC	1	YCR045W-A	1	YCR045W-A	0
YCR045W-A	YCR045W-A	3	219614	219964	+	CTAAATTGAAGTTCCCCGCCGCGGCAACAAATACAATACCTTCTTCAATG	CTCTGTCTTCGAATTCCGGATGGTCCGCGAAGATACCCGTATCCATGATA	TTCAATTACTACTATGAACACGACTATCAAGGTCAAGACGTCAACGCCTA	CTAAATTGAAGTTCCCCGCCGCGGCAACAAATACAATACCTTCTTCAATGCGGATCCCCGGGTTAATTAA	CTCTGTCTTCGAATTCCGGATGGTCCGCGAAGATACCCGTATCCATGATACGGATCCCCGGGTTAATTAA	TTCAATTACTACTATGAACACGACTATCAAGGTCAAGACGTCAACGCCTAGAATTCGAGCTCGTTTAAAC	1	YCR045C	1	YCR045C	0
YCR046C	IMG1	3	220777	221286	-	GAGTCTTCCCTCTGAGCAGCTGCTGAAAGGGAGAGAGAACCATAGCGATG	GTACAAGGTTGGATGTCGGCGACCTCGAGGCAGGTCTAAGAAGAAAGAAA	TTTTTCTTATATACAGGAGATGGGTGGCCACAGAACCCGCGCCTAGCCTA	GAGTCTTCCCTCTGAGCAGCTGCTGAAAGGGAGAGAGAACCATAGCGATGCGGATCCCCGGGTTAATTAA	GTACAAGGTTGGATGTCGGCGACCTCGAGGCAGGTCTAAGAAGAAAGAAACGGATCCCCGGGTTAATTAA	TTTTTCTTATATACAGGAGATGGGTGGCCACAGAACCCGCGCCTAGCCTAGAATTCGAGCTCGTTTAAAC	0		0		0
YCR047C	BUD23	3	221581	222408	-	AAAAAGGTGCGGTACGGAAACACAGGAAATATATCAGAGAAGAAATAATG	AAGTTGCGAAGGACTCCAAGTTCACCGGGAGGAAAAGAAGACACAGGTTC	TTTTTATAGTATACAAAAGAATATGCGTGTGAGGATGTGTGTTTCTTCTA	AAAAAGGTGCGGTACGGAAACACAGGAAATATATCAGAGAAGAAATAATGCGGATCCCCGGGTTAATTAA	AAGTTGCGAAGGACTCCAAGTTCACCGGGAGGAAAAGAAGACACAGGTTCCGGATCCCCGGGTTAATTAA	TTTTTATAGTATACAAAAGAATATGCGTGTGAGGATGTGTGTTTCTTCTAGAATTCGAGCTCGTTTAAAC	1	YCR047W-A	1	YCR047W-A	0
YCR047W-A	YCR047W-A	3	222164	222370	+	GCAACATCAAGTCGCCCTCCAGCTCTCTACTAAGACCGGTCGCAAGCATG	TATGCTGCACTCTGGTCGAACCCGTGTACTTGTGTGCTTCGCTATCATTA	GAAGAAATAATGTCACGTCCTGAGGAGTTGGCACCACCGGAGATTTTCTA	GCAACATCAAGTCGCCCTCCAGCTCTCTACTAAGACCGGTCGCAAGCATGCGGATCCCCGGGTTAATTAA	TATGCTGCACTCTGGTCGAACCCGTGTACTTGTGTGCTTCGCTATCATTACGGATCCCCGGGTTAATTAA	GAAGAAATAATGTCACGTCCTGAGGAGTTGGCACCACCGGAGATTTTCTAGAATTCGAGCTCGTTTAAAC	1	YCR047C	1	YCR047C	0
YCR049C	YCR049C	3	222734	223180	-	GTTTCTCCAGCACCGGACCTTTGAAAGTCGTCTGGAAGGGCACGTTGATG	CAATCTGTTTTGGCGCTCTTGCTGCAAGCCGTGCTGAACAACCACCTGCG	TATAAGAAGGACGAGCGTGGTGGAGGAAAGGGGCGCCATTGGCACACTCA	GTTTCTCCAGCACCGGACCTTTGAAAGTCGTCTGGAAGGGCACGTTGATGCGGATCCCCGGGTTAATTAA	CAATCTGTTTTGGCGCTCTTGCTGCAAGCCGTGCTGAACAACCACCTGCGCGGATCCCCGGGTTAATTAA	TATAAGAAGGACGAGCGTGGTGGAGGAAAGGGGCGCCATTGGCACACTCAGAATTCGAGCTCGTTTAAAC	1	YCR048W	1	YCR048W	0
YCR048W	ARE1,SAT2	3	222792	224624	+	GTTGTTCAGCACGGCTTGCAGCAAGAGCGCCAAAACAGATTGCAAGAATG	TTGGTGTCTGTTCAGGGCCCAGTATCATTATGACGTTGTACCTGACCTTA	TATATCTATCAAGGGCTTGCGAGGGACACACGTGGTATGGTGGCAGTTCA	GTTGTTCAGCACGGCTTGCAGCAAGAGCGCCAAAACAGATTGCAAGAATGCGGATCCCCGGGTTAATTAA	TTGGTGTCTGTTCAGGGCCCAGTATCATTATGACGTTGTACCTGACCTTACGGATCCCCGGGTTAATTAA	TATATCTATCAAGGGCTTGCGAGGGACACACGTGGTATGGTGGCAGTTCAGAATTCGAGCTCGTTTAAAC	2	YCR049C;YCR050C	2	YCR049C;YCR050C	0
YCR050C	YCR050C	3	224327	224635	-	ATTCCCTATTGTATATCTATCAAGGGCTTGCGAGGGACACACGTGGTATG	AATGCAATGCGCCCATGGAGCTGTGGTACACGTGTCTTAGTAAAAATTTG	AATTGCGTTTCGTTTGAAGAGTTTAGCAGAATCTGGAACGTCCCCGTTCA	ATTCCCTATTGTATATCTATCAAGGGCTTGCGAGGGACACACGTGGTATGCGGATCCCCGGGTTAATTAA	AATGCAATGCGCCCATGGAGCTGTGGTACACGTGTCTTAGTAAAAATTTGCGGATCCCCGGGTTAATTAA	AATTGCGTTTCGTTTGAAGAGTTTAGCAGAATCTGGAACGTCCCCGTTCAGAATTCGAGCTCGTTTAAAC	1	YCR048W	1	YCR048W	0
YCR051W	YCR051W	3	224934	225602	+	GTTTGCAGGTGACAAAAATCGATGATTATAGGTGTTGTGACGACAAAATG	AGGGCTCCATGGCGGGTTCCGGGGACGAACCAGATTCCAAGAGAAGAAAA	GCGTTCAATTTCTTTTAGCAAGCTGTAAGAGCCTTTGTGCTGGGTCGTTA	GTTTGCAGGTGACAAAAATCGATGATTATAGGTGTTGTGACGACAAAATGCGGATCCCCGGGTTAATTAA	AGGGCTCCATGGCGGGTTCCGGGGACGAACCAGATTCCAAGAGAAGAAAACGGATCCCCGGGTTAATTAA	GCGTTCAATTTCTTTTAGCAAGCTGTAAGAGCCTTTGTGCTGGGTCGTTAGAATTCGAGCTCGTTTAAAC	0		0		0
YCR052W	RSC6	3	225857	227308	+	CAAGGCAGCTTCGTATAGTAATACAGCACGAAAAACAGCTCATAGAAATG	ACAGGTCACTAATGGGCAATATCTCACTACTGTACTCCCAAGGAAGACTA	GAGGAGGCGTGCAATAATTGCAGAAAGAATGAGATCATACAGTGATGTTA	CAAGGCAGCTTCGTATAGTAATACAGCACGAAAAACAGCTCATAGAAATGCGGATCCCCGGGTTAATTAA	ACAGGTCACTAATGGGCAATATCTCACTACTGTACTCCCAAGGAAGACTACGGATCCCCGGGTTAATTAA	GAGGAGGCGTGCAATAATTGCAGAAAGAATGAGATCATACAGTGATGTTAGAATTCGAGCTCGTTTAAAC	0		0		0
YCR053W	THR4	3	227560	229104	+	TATAGCAGCAAATATTTGTTCTTAGACGGCCACCATCCCTCACACCAATG	TTGAATTGGTCAAAAACGCTATTGAAGAAGAACTTGCTAAAATGAAATTA	TTCTATATGTTATATAAGATAAAATATATTCATTAAAAAGGAAGATCTTA	TATAGCAGCAAATATTTGTTCTTAGACGGCCACCATCCCTCACACCAATGCGGATCCCCGGGTTAATTAA	TTGAATTGGTCAAAAACGCTATTGAAGAAGAACTTGCTAAAATGAAATTACGGATCCCCGGGTTAATTAA	TTCTATATGTTATATAAGATAAAATATATTCATTAAAAAGGAAGATCTTAGAATTCGAGCTCGTTTAAAC	0		0		0
YCR054C	CTR86	3	229239	230930	-	CCTTATAAAATTATTGATTCATCAAAAAAGAAGATAACTAAATAACAATG	AAGAAGACCCTGGGAACGAGAATTCTGAGATTATTAGCATAGATGAAGAT	ATGTTAATCAAAGTGAATCATGATTGCGAGAGTAAGGAACCATAAAATTA	CCTTATAAAATTATTGATTCATCAAAAAAGAAGATAACTAAATAACAATGCGGATCCCCGGGTTAATTAA	AAGAAGACCCTGGGAACGAGAATTCTGAGATTATTAGCATAGATGAAGATCGGATCCCCGGGTTAATTAA	ATGTTAATCAAAGTGAATCATGATTGCGAGAGTAAGGAACCATAAAATTAGAATTCGAGCTCGTTTAAAC	0		0		0
YCR057C	PWP2,UTP1,YCR058C,YCR055C	3	231320	234091	-	TTCAACAGGTAGACAGGAGAGCAGACCGCAGATTGAACCGCATCCCAATG	CTAATGAAAATGATTCCAGTGATGAAGAAGAAAATGAGAAAGAGCTTCCT	GGAATACATGATGTGAATGTGCATAAATAGAGGACAGTGAATATTTTTCA	TTCAACAGGTAGACAGGAGAGCAGACCGCAGATTGAACCGCATCCCAATGCGGATCCCCGGGTTAATTAA	CTAATGAAAATGATTCCAGTGATGAAGAAGAAAATGAGAAAGAGCTTCCTCGGATCCCCGGGTTAATTAA	GGAATACATGATGTGAATGTGCATAAATAGAGGACAGTGAATATTTTTCAGAATTCGAGCTCGTTTAAAC	0		0		0
YCR059C	YIH1	3	234317	235093	-	AGGAATATGTAACAAGAAAAAAAAAAGAGAGAGGAAAGAAAAGCTCAATG	ACATCAATTCTACGGCAAGAGAAGCTGTTGTCAGGGCCGGCTTCGACTCG	CCGTCGCATGTGATCAAGGTTACAGGTGCTTGACATAATCATAATGATTA	AGGAATATGTAACAAGAAAAAAAAAAGAGAGAGGAAAGAAAAGCTCAATGCGGATCCCCGGGTTAATTAA	ACATCAATTCTACGGCAAGAGAAGCTGTTGTCAGGGCCGGCTTCGACTCGCGGATCCCCGGGTTAATTAA	CCGTCGCATGTGATCAAGGTTACAGGTGCTTGACATAATCATAATGATTAGAATTCGAGCTCGTTTAAAC	0		0		0
YCR060W	TAH1	3	235262	235597	+	GGTTTTTTCTTTTCAGCACTGCGAAAGAGAGAGCAACGGTAAAGAGCATG	AGATCCCTGTTGTAGAGGTTGATGAACTACCGGAGGGATACGACCGGTCC	TATATATAATTTTAAAGATAAATTAGAAGTGTTCCCTTTCTCTTTTCTCA	GGTTTTTTCTTTTCAGCACTGCGAAAGAGAGAGCAACGGTAAAGAGCATGCGGATCCCCGGGTTAATTAA	AGATCCCTGTTGTAGAGGTTGATGAACTACCGGAGGGATACGACCGGTCCCGGATCCCCGGGTTAATTAA	TATATATAATTTTAAAGATAAATTAGAAGTGTTCCCTTTCTCTTTTCTCAGAATTCGAGCTCGTTTAAAC	0		0		0
YCR061W	YCR061W	3	236426	238321	+	TGCATTGTACTCTTAATACCCCAACCAAAAACAAAATAGTGAGAGTAATG	TTTTATTTATTTGGAAAGACTGGCTCATCAAAACCAGGAAAACCAGTCTT	GAGGGGGGGGTGAAAAAAAAAAGAAAAAAGAAAAGCCATTATGGCGGTTA	TGCATTGTACTCTTAATACCCCAACCAAAAACAAAATAGTGAGAGTAATGCGGATCCCCGGGTTAATTAA	TTTTATTTATTTGGAAAGACTGGCTCATCAAAACCAGGAAAACCAGTCTTCGGATCCCCGGGTTAATTAA	GAGGGGGGGGTGAAAAAAAAAAGAAAAAAGAAAAGCCATTATGGCGGTTAGAATTCGAGCTCGTTTAAAC	0		0		0
YCR064C	YCR064C	3	238957	239367	-	CGTAAAGGTCTTTGGAGATGGCCTTTCTCTTGTAGTACAGAGTATATATG	CCACAACGCGTGTGATTGATCTTGTACTGGTTGTAAATGTGCTAAGTCTG	TTTTTTTTAAATAACATCGTTGATTAAAACAATCCTATTCACTGCAGTCA	CGTAAAGGTCTTTGGAGATGGCCTTTCTCTTGTAGTACAGAGTATATATGCGGATCCCCGGGTTAATTAA	CCACAACGCGTGTGATTGATCTTGTACTGGTTGTAAATGTGCTAAGTCTGCGGATCCCCGGGTTAATTAA	TTTTTTTTAAATAACATCGTTGATTAAAACAATCCTATTCACTGCAGTCAGAATTCGAGCTCGTTTAAAC	1	YCR063W	1	YCR063W	0
YCR063W	BUD31,CWC14	3	239180	239653	+	CACCTCTACAGCCGTCAAGACTAGCAAAGCTCACCTCACAAAACGACATG	CCTTCCATCAGTGCGTCCACTGCGGCTGCCGTGGATGTGCAAGCACAGAC	AGAGATAATTACATGGCCAGAACAATACTGCAACGTGCATATAGTCGTTA	CACCTCTACAGCCGTCAAGACTAGCAAAGCTCACCTCACAAAACGACATGCGGATCCCCGGGTTAATTAA	CCTTCCATCAGTGCGTCCACTGCGGCTGCCGTGGATGTGCAAGCACAGACCGGATCCCCGGGTTAATTAA	AGAGATAATTACATGGCCAGAACAATACTGCAACGTGCATATAGTCGTTAGAATTCGAGCTCGTTTAAAC	1	YCR064C	1	YCR064C	0
YCR065W	HCM1	3	240172	241866	+	ATTTCGAAGCAAAAAAAAAAAAAATCAACAAAAATTCCAACTTTTCAATG	ATCATCCTTATCATAATCACCCTTCCAACGATAGCGGTAATGAAAAGAAT	TTAGTTTTCGGTGAGGAAAAGAAAATGAAAAAAAAAAAAAAAAAAAGTCA	ATTTCGAAGCAAAAAAAAAAAAAATCAACAAAAATTCCAACTTTTCAATGCGGATCCCCGGGTTAATTAA	ATCATCCTTATCATAATCACCCTTCCAACGATAGCGGTAATGAAAAGAATCGGATCCCCGGGTTAATTAA	TTAGTTTTCGGTGAGGAAAAGAAAATGAAAAAAAAAAAAAAAAAAAGTCAGAATTCGAGCTCGTTTAAAC	0		0		0
YCR066W	RAD18	3	242362	243825	+	CGCAAGTGAGCATCACAGCTACTAAGAAAAGGCCATTTTTACTACTCATG	GAGAATTAATGGACTTGAATGAATATAGTAAAGACCCACCCGGTAACAAT	ACAAATGTGCACAAGCTAACAAACAGGCCTGATTACATATACACACCTTA	CGCAAGTGAGCATCACAGCTACTAAGAAAAGGCCATTTTTACTACTCATGCGGATCCCCGGGTTAATTAA	GAGAATTAATGGACTTGAATGAATATAGTAAAGACCCACCCGGTAACAATCGGATCCCCGGGTTAATTAA	ACAAATGTGCACAAGCTAACAAACAGGCCTGATTACATATACACACCTTAGAATTCGAGCTCGTTTAAAC	0		0		0
YCR067C	SED4	3	243987	247184	-	CTTCCTTTTTTTTCTCTCCTTTTAAACTTAGAAAAACTAGCATAATAATG	ATAATGCAGTAGCAGGAACCGTAAACTACGCTGGCCTTCATGACGAATTG	CAAAGCTATGTAATCATATTTAACATTAATATATATTATTTCGTTATTCA	CTTCCTTTTTTTTCTCTCCTTTTAAACTTAGAAAAACTAGCATAATAATGCGGATCCCCGGGTTAATTAA	ATAATGCAGTAGCAGGAACCGTAAACTACGCTGGCCTTCATGACGAATTGCGGATCCCCGGGTTAATTAA	CAAAGCTATGTAATCATATTTAACATTAATATATATTATTTCGTTATTCAGAATTCGAGCTCGTTTAAAC	0		0		0
YCR068W	ATG15,CVT17,AUT5	3	248076	249638	+	TGATCTAGGCATTACAATTAAAGGAAACAAGGGAAATATTCTATTGAATG	CTACCTGTGTAGGCCGCAATTGGCTTGGCTTCTGCACCAAATACGAGTTG	CGCATAGGCCCTAAAACAACACTAGGGTCATAATAGATGTATGGGTCTTA	TGATCTAGGCATTACAATTAAAGGAAACAAGGGAAATATTCTATTGAATGCGGATCCCCGGGTTAATTAA	CTACCTGTGTAGGCCGCAATTGGCTTGGCTTCTGCACCAAATACGAGTTGCGGATCCCCGGGTTAATTAA	CGCATAGGCCCTAAAACAACACTAGGGTCATAATAGATGTATGGGTCTTAGAATTCGAGCTCGTTTAAAC	0		0		0
YCR069W	CPR4,SCC3,YCR070W,CYP4	3	249917	250873	+	GAAGACCGAAGAAAATAGATAGACTTTCGAATAAGTTCAGCAACAACATG	CCTACAAGGGCATGCACGAAAAGCCTCATACGGTTTCATTAAGACACAAG	ATTAAAATCATAGCCATGTGGTCATCAAGCCATCGAAAAGAAGTTGCTTA	GAAGACCGAAGAAAATAGATAGACTTTCGAATAAGTTCAGCAACAACATGCGGATCCCCGGGTTAATTAA	CCTACAAGGGCATGCACGAAAAGCCTCATACGGTTTCATTAAGACACAAGCGGATCCCCGGGTTAATTAA	ATTAAAATCATAGCCATGTGGTCATCAAGCCATCGAAAAGAAGTTGCTTAGAATTCGAGCTCGTTTAAAC	0		0		0
YCR071C	IMG2	3	250965	251405	-	CCGTTTACCTAAAGCAACTTACTCCAAGGTAGCGTGTGAGCAAAACTATG	TCAAGGGCAATGCAGTAGAGGCTGTCAAAAGGGTATTAACCAAGAAATTT	AATTAATATATATACATGACAATTATTTTTTTATACATTAGCGATACCTA	CCGTTTACCTAAAGCAACTTACTCCAAGGTAGCGTGTGAGCAAAACTATGCGGATCCCCGGGTTAATTAA	TCAAGGGCAATGCAGTAGAGGCTGTCAAAAGGGTATTAACCAAGAAATTTCGGATCCCCGGGTTAATTAA	AATTAATATATATACATGACAATTATTTTTTTATACATTAGCGATACCTAGAATTCGAGCTCGTTTAAAC	0		0		0
YCR072C	RSA4	3	251667	253214	-	TTTTTATATTTGTAACCTCGATAAACACACACTAACACAATATACAGATG	AAAGAGTGTGTAGTGGTGGGAAAGACAAGATGGTAAGATTGTGGACGCAT	ATATAATATTTATATGTGCATGTATGTTACTTGTCTTTGCACATAACTCA	TTTTTATATTTGTAACCTCGATAAACACACACTAACACAATATACAGATGCGGATCCCCGGGTTAATTAA	AAAGAGTGTGTAGTGGTGGGAAAGACAAGATGGTAAGATTGTGGACGCATCGGATCCCCGGGTTAATTAA	ATATAATATTTATATGTGCATGTATGTTACTTGTCTTTGCACATAACTCAGAATTCGAGCTCGTTTAAAC	0		0		0
YCR073C	SSK22	3	253450	257445	-	TTGTTTTACTTAGGGTGGCTATAAAAGGTAGTTCCTTGTAGGTGAAAATG	AAATAGCATTTGGCAACTCAGAGAAAGATCAAGTACCTATCCTAAGCTCA	ATTACATTATATATCGTAGTATATCATATTTTTAGACGTTGACCACTCTA	TTGTTTTACTTAGGGTGGCTATAAAAGGTAGTTCCTTGTAGGTGAAAATGCGGATCCCCGGGTTAATTAA	AAATAGCATTTGGCAACTCAGAGAAAGATCAAGTACCTATCCTAAGCTCACGGATCCCCGGGTTAATTAA	ATTACATTATATATCGTAGTATATCATATTTTTAGACGTTGACCACTCTAGAATTCGAGCTCGTTTAAAC	0		0		0
YCR073W-A	SOL2,YCRX13W	3	257825	258772	+	CAGTGTAGGTATGGACTAGAACAGAAAGCAATTTGCAGCAAGACAATATG	ACGTCCTCGTCACCAAAAAAAAGTATAAATTCCACCAAGGTTTGTCTATT	ATGTATGTATGTATGTGTGTATGTATGTATGTACACACATGCATGGTTTA	CAGTGTAGGTATGGACTAGAACAGAAAGCAATTTGCAGCAAGACAATATGCGGATCCCCGGGTTAATTAA	ACGTCCTCGTCACCAAAAAAAAGTATAAATTCCACCAAGGTTTGTCTATTCGGATCCCCGGGTTAATTAA	ATGTATGTATGTATGTGTGTATGTATGTATGTACACACATGCATGGTTTAGAATTCGAGCTCGTTTAAAC	0		0		0
YCR075C	ERS1	3	258895	259677	-	ACAAGGGAAGAAAAACTAAAAGCAAACAAAAGCAAACGCGAAGCAAAATG	GGTTTGTATATCGATCTCGAGGCCATGATCTGGCGTCAGAGTACCCGCTG	ATATATATATATATATATGCGTAATTATGCAGATTTCTCCTTGTGTGCTA	ACAAGGGAAGAAAAACTAAAAGCAAACAAAAGCAAACGCGAAGCAAAATGCGGATCCCCGGGTTAATTAA	GGTTTGTATATCGATCTCGAGGCCATGATCTGGCGTCAGAGTACCCGCTGCGGATCCCCGGGTTAATTAA	ATATATATATATATATATGCGTAATTATGCAGATTTCTCCTTGTGTGCTAGAATTCGAGCTCGTTTAAAC	0		0		0
YCR075W-A	YCR075W-A	3	259837	260064	+	AGGGCAATACCACAACCTCAAACCAAATCACCTAAACCAAATCAAAGATG	ACCTGTACAAACGCAATGATATCACTTTAGCTGTATATACCAGCGCTCAA	TTTAGATAGTATACAGACATAGCTATGTCGAAAGGGAAGGAAAGAATTTA	AGGGCAATACCACAACCTCAAACCAAATCACCTAAACCAAATCAAAGATGCGGATCCCCGGGTTAATTAA	ACCTGTACAAACGCAATGATATCACTTTAGCTGTATATACCAGCGCTCAACGGATCCCCGGGTTAATTAA	TTTAGATAGTATACAGACATAGCTATGTCGAAAGGGAAGGAAAGAATTTAGAATTCGAGCTCGTTTAAAC	0		0		0
YCR076C	YCR076C	3	260155	260907	-	CCGTATTAGCATCAATAATACCACCATAGTAACGCAAGAGTTAAACAATG	TTGGAGGTTCAGGATCCGGCGGATTTGGAGGGTCAGGATCTGGCTTTATT	TAAAAACTAAATATCACAATAAACAAAGTACTAAAATAAACACCCATTTA	CCGTATTAGCATCAATAATACCACCATAGTAACGCAAGAGTTAAACAATGCGGATCCCCGGGTTAATTAA	TTGGAGGTTCAGGATCCGGCGGATTTGGAGGGTCAGGATCTGGCTTTATTCGGATCCCCGGGTTAATTAA	TAAAAACTAAATATCACAATAAACAAAGTACTAAAATAAACACCCATTTAGAATTCGAGCTCGTTTAAAC	0		0		0
YCR077C	PAT1,MRT1	3	261100	263490	-	GAAGCAAAGGTTTTAACCGGAAGTAAGAGCAGCAAGAAGCACTAGCAATG	TAAACGTTATGGGGTTGGTGTATCGCGATGGTGAAATATCAGAACTAAAG	AGAAAAAAAAATACATGCGTAAGTACATTAAAATTACAGGAAAAATCTTA	GAAGCAAAGGTTTTAACCGGAAGTAAGAGCAGCAAGAAGCACTAGCAATGCGGATCCCCGGGTTAATTAA	TAAACGTTATGGGGTTGGTGTATCGCGATGGTGAAATATCAGAACTAAAGCGGATCCCCGGGTTAATTAA	AGAAAAAAAAATACATGCGTAAGTACATTAAAATTACAGGAAAAATCTTAGAATTCGAGCTCGTTTAAAC	0		0		0
YCR079W	PTC6,AUP1	3	263707	265035	+	TAACAGGCTGCAATCGGGGCAATTAAGCATCAGAAGAGGGGAATTTGATG	AAAGAGAAACCAAACTAATGAATGCACAATCTAACGAAACAAAATTAAAC	AATACAAAAGATGATTATCTAGGACTTGTTTCCACCCAGGGGGGTGTTTA	TAACAGGCTGCAATCGGGGCAATTAAGCATCAGAAGAGGGGAATTTGATGCGGATCCCCGGGTTAATTAA	AAAGAGAAACCAAACTAATGAATGCACAATCTAACGAAACAAAATTAAACCGGATCCCCGGGTTAATTAA	AATACAAAAGATGATTATCTAGGACTTGTTTCCACCCAGGGGGGTGTTTAGAATTCGAGCTCGTTTAAAC	0		0		0
YCR081W	SRB8,MED12,YCR080W,SSN5,NUT6,GIG1	3	265233	269516	+	TAATCGAAAGATTAAAAAAAGGTCTATAGAGGTAAGCCAATAACGCGATG	GTGTAAACCTGAGTCTTTTTGATGCTCGGTTTGAGAGGAAAAATCCACAT	CTGTTATTGGTAAATTTATAATTTATCCATTTGGATATATTCTGAGATCA	TAATCGAAAGATTAAAAAAAGGTCTATAGAGGTAAGCCAATAACGCGATGCGGATCCCCGGGTTAATTAA	GTGTAAACCTGAGTCTTTTTGATGCTCGGTTTGAGAGGAAAAATCCACATCGGATCCCCGGGTTAATTAA	CTGTTATTGGTAAATTTATAATTTATCCATTTGGATATATTCTGAGATCAGAATTCGAGCTCGTTTAAAC	1	YCR081C-A	1	YCR081C-A	0
YCR081C-A	YCR081C-A	3	269277	269513	-	TTATTGGTAAATTTATAATTTATCCATTTGGATATATTCTGAGATCAATG	ATGAGCCATTTCTGTTCGTTTTCGTGCGCTATTTCAACTATGCCGATTCC	ACGGGGAAGAAGAAGATGCAGACCAAGAAGAATCGTTTAGTTTAAATTTA	TTATTGGTAAATTTATAATTTATCCATTTGGATATATTCTGAGATCAATGCGGATCCCCGGGTTAATTAA	ATGAGCCATTTCTGTTCGTTTTCGTGCGCTATTTCAACTATGCCGATTCCCGGATCCCCGGGTTAATTAA	ACGGGGAAGAAGAAGATGCAGACCAAGAAGAATCGTTTAGTTTAAATTTAGAATTCGAGCTCGTTTAAAC	1	YCR081W	1	YCR081W	0
YCR082W	AHC2	3	269745	270131	+	CCGCTTACAAGATCAGTACTAGCGTGTACCAGTCTATTTAAACTGGAATG	ATATAGCAGAGAACGATCAATTGTTGGCTTTGTATGAAGATGGCTTATTA	ATATATATATAAATATATGTTTAAAAATGTCCATAGCCGCTATTTGATCA	CCGCTTACAAGATCAGTACTAGCGTGTACCAGTCTATTTAAACTGGAATGCGGATCCCCGGGTTAATTAA	ATATAGCAGAGAACGATCAATTGTTGGCTTTGTATGAAGATGGCTTATTACGGATCCCCGGGTTAATTAA	ATATATATATAAATATATGTTTAAAAATGTCCATAGCCGCTATTTGATCAGAATTCGAGCTCGTTTAAAC	0		0		0
YCR083W	TRX3	3	270439	270822	+	ACCAAAGAAAGCAGGATTGGTTAGTACATAGAGAAACCAAAGCTGTTATG	AGATCATTGGAGCTAACCCTACTGCTTTAGAGAAGGGAATCAAAGATCTA	TTAAAACTAAAAAAAAAAAAAACTACATGTGCTTATGAATATAAAATTTA	ACCAAAGAAAGCAGGATTGGTTAGTACATAGAGAAACCAAAGCTGTTATGCGGATCCCCGGGTTAATTAA	AGATCATTGGAGCTAACCCTACTGCTTTAGAGAAGGGAATCAAAGATCTACGGATCCCCGGGTTAATTAA	TTAAAACTAAAAAAAAAAAAAACTACATGTGCTTATGAATATAAAATTTAGAATTCGAGCTCGTTTAAAC	0		0		0
YCR084C	TUP1,UMR7,SFL2,ROX4,FLK1,CYC9,CRT4,AMM1,AER2,AAR1	3	271173	273314	-	TTTGATAAGCAGGGGAAGAAAGAAATCAGCTTTCCATCCAAACCAATATG	GCGGTGATTGTAAAGCAAGGATTTGGAAGTATAAAAAAATAGCGCCAAAT	TAGTTTAGTTAGTTACATTTGTAAAGTGTTCCTTTTGTGTTCTGTTCTTA	TTTGATAAGCAGGGGAAGAAAGAAATCAGCTTTCCATCCAAACCAATATGCGGATCCCCGGGTTAATTAA	GCGGTGATTGTAAAGCAAGGATTTGGAAGTATAAAAAAATAGCGCCAAATCGGATCCCCGGGTTAATTAA	TAGTTTAGTTAGTTACATTTGTAAAGTGTTCCTTTTGTGTTCTGTTCTTAGAATTCGAGCTCGTTTAAAC	0		0		0
YCR085W	YCR085W	3	273778	274131	+	CCAAAAAGAAGGGTAAATTAGGGCTTTCCTGGTTTATTTATTTGTTTATG	ATTTTATTTTGTTTATGCTTCAATATCTTGTATTTGTTTACATTGAAAAA	TCTGTCTGCTTCTTCACTGTTTTGATTTCAATGTAACCTTTTTCCAATCA	CCAAAAAGAAGGGTAAATTAGGGCTTTCCTGGTTTATTTATTTGTTTATGCGGATCCCCGGGTTAATTAA	ATTTTATTTTGTTTATGCTTCAATATCTTGTATTTGTTTACATTGAAAAACGGATCCCCGGGTTAATTAA	TCTGTCTGCTTCTTCACTGTTTTGATTTCAATGTAACCTTTTTCCAATCAGAATTCGAGCTCGTTTAAAC	0		0		0
YCR086W	CSM1	3	274256	274828	+	CAATAAAAAAAAAAGAAAGCGAAACAAGACAATCCAACGTGCGCAAAATG	AAATCGCTAAAAGCCTGAATAAGAAAAGAGAGAAAAAAGATGAAACCGAG	GAATAATCGGAATTTTATGTGTAGATATATAGACATTATGTAGCAGCTTA	CAATAAAAAAAAAAGAAAGCGAAACAAGACAATCCAACGTGCGCAAAATGCGGATCCCCGGGTTAATTAA	AAATCGCTAAAAGCCTGAATAAGAAAAGAGAGAAAAAAGATGAAACCGAGCGGATCCCCGGGTTAATTAA	GAATAATCGGAATTTTATGTGTAGATATATAGACATTATGTAGCAGCTTAGAATTCGAGCTCGTTTAAAC	0		0		0
YCR087W	YCR087W	3	274840	275340	+	AATAAGAAAAGAGAGAAAAAAGATGAAACCGAGTAAGCTGCTACATAATG	TTGCACACCTCACAGTTGAACGTAACCATCCTGTAATAACAAATATTTCT	GCGATGAGCTCTAAGAGTATTCTGTATACAACAGCAAACGGTCTCAGTCA	AATAAGAAAAGAGAGAAAAAAGATGAAACCGAGTAAGCTGCTACATAATGCGGATCCCCGGGTTAATTAA	TTGCACACCTCACAGTTGAACGTAACCATCCTGTAATAACAAATATTTCTCGGATCCCCGGGTTAATTAA	GCGATGAGCTCTAAGAGTATTCTGTATACAACAGCAAACGGTCTCAGTCAGAATTCGAGCTCGTTTAAAC	1	YCR087C-A	1	YCR087C-A	0
YCR087C-A	LUG1	3	274870	275316	-	TATACAACAGCAAACGGTCTCAGTCAAGAAATATTTGTTATTACAGGATG	TGAAAAGTCTGGTTGTGGATTCTGAGGGGCAAATCAGGTATGCAAAGGAA	GAGTAAGCTGCTACATAATGTCTATATATCTACACATAAAATTCCGATTA	TATACAACAGCAAACGGTCTCAGTCAAGAAATATTTGTTATTACAGGATGCGGATCCCCGGGTTAATTAA	TGAAAAGTCTGGTTGTGGATTCTGAGGGGCAAATCAGGTATGCAAAGGAACGGATCCCCGGGTTAATTAA	GAGTAAGCTGCTACATAATGTCTATATATCTACACATAAAATTCCGATTAGAATTCGAGCTCGTTTAAAC	1	YCR087W	1	YCR087W	0
YCR088W	ABP1	3	275917	277695	+	CAATCGCATAACCGCACGTATATATACGCACACACCTATCAATCACAATG	AAGACGGCTCAAAAGGTCTCTTCCCCAGCAATTATGTGTCTTTGGGCAAC	TTTTTTTACGTAAGAATAATATAATAGCATGACGCTGACGTGTGATTCTA	CAATCGCATAACCGCACGTATATATACGCACACACCTATCAATCACAATGCGGATCCCCGGGTTAATTAA	AAGACGGCTCAAAAGGTCTCTTCCCCAGCAATTATGTGTCTTTGGGCAACCGGATCCCCGGGTTAATTAA	TTTTTTTACGTAAGAATAATATAATAGCATGACGCTGACGTGTGATTCTAGAATTCGAGCTCGTTTAAAC	0		0		0
YCR089W	FIG2	3	278283	283127	+	AAAAGCACACTACAAAAATACGCTATCATCTACCGAATATAACTGCAATG	TTCTCTGTAGTAAGTTCTTTATGATAATGGTAATGGTGATCAACTTCATT	AGTGTCTGTTTATAGCATATATACGTACATATAATATATACGGGAAATTA	AAAAGCACACTACAAAAATACGCTATCATCTACCGAATATAACTGCAATGCGGATCCCCGGGTTAATTAA	TTCTCTGTAGTAAGTTCTTTATGATAATGGTAATGGTGATCAACTTCATTCGGATCCCCGGGTTAATTAA	AGTGTCTGTTTATAGCATATATACGTACATATAATATATACGGGAAATTAGAATTCGAGCTCGTTTAAAC	0		0		0
YCR090C	YCR090C	3	283179	283727	-	GAATAAAGACAACTTAACCAATAAAGAAAACCAGGTTGTGTACGATAATG	GGGAAGAAGTAACAATGACTGATTTCTCATCAAGCATTATTAAAGGTAAG	CCGTATATATTATATGTACGTATATATGCTATAAACAGACACTCTTTTTA	GAATAAAGACAACTTAACCAATAAAGAAAACCAGGTTGTGTACGATAATGCGGATCCCCGGGTTAATTAA	GGGAAGAAGTAACAATGACTGATTTCTCATCAAGCATTATTAAAGGTAAGCGGATCCCCGGGTTAATTAA	CCGTATATATTATATGTACGTATATATGCTATAAACAGACACTCTTTTTAGAATTCGAGCTCGTTTAAAC	0		0		0
YCR091W	KIN82	3	285267	287429	+	AGTGCCCTAAGGATTACCGCAAACAAGGTTCAACAGTGTTGGTACACATG	GGCATAACAGCTCACATAGAAGTTTCTTTAAAGACATCATACCTGAACTA	GAAACAATACAGAAATTTGGCCATGGGTTTATCTTTCTGTAAACATGTTA	AGTGCCCTAAGGATTACCGCAAACAAGGTTCAACAGTGTTGGTACACATGCGGATCCCCGGGTTAATTAA	GGCATAACAGCTCACATAGAAGTTTCTTTAAAGACATCATACCTGAACTACGGATCCCCGGGTTAATTAA	GAAACAATACAGAAATTTGGCCATGGGTTTATCTTTCTGTAAACATGTTAGAATTCGAGCTCGTTTAAAC	0		0		0
YCR092C	MSH3	3	287627	290683	-	CCAAAAGCAGTGCAAATAGATTTATTTTGTTGAATCTATTAACAATAATG	ATATAACAGCAACGGATAAACTCGCGAAATTACTATCATTGGATATCCAC	ATTTATTGTCTGATAATGCTGCATTTAGAACATACGTACCATCCGCATCA	CCAAAAGCAGTGCAAATAGATTTATTTTGTTGAATCTATTAACAATAATGCGGATCCCCGGGTTAATTAA	ATATAACAGCAACGGATAAACTCGCGAAATTACTATCATTGGATATCCACCGGATCCCCGGGTTAATTAA	ATTTATTGTCTGATAATGCTGCATTTAGAACATACGTACCATCCGCATCAGAATTCGAGCTCGTTTAAAC	0		0		0
YCR093W	CDC39,SMD6,ROS1,NOT1	3	290980	297306	+	GTAAAAGATAAGCAATTGAGAAACGTCACTCAGGGACAATTGATTACATG	ACCAATCCGCCACCATCAATAGAAGGCAAACCCCTCTACAATCCAACGCA	TTTTTTTCTGAAATCATGATTTTCGTATATAAATAAATGCAGTTTTTTTA	GTAAAAGATAAGCAATTGAGAAACGTCACTCAGGGACAATTGATTACATGCGGATCCCCGGGTTAATTAA	ACCAATCCGCCACCATCAATAGAAGGCAAACCCCTCTACAATCCAACGCACGGATCCCCGGGTTAATTAA	TTTTTTTCTGAAATCATGATTTTCGTATATAAATAAATGCAGTTTTTTTAGAATTCGAGCTCGTTTAAAC	0		0		0
YCR094W	CDC50	3	297625	298800	+	AGAATAATTGAGTAATCGAACTTGAAGTTCTATAGAACAGCTTGTATATG	AGGATTATGAGGATGTACACGCAGAGAATACAACATTGAGGGAAATTTTA	CTTATAAACACAAATACCTACAGGCACTAAAGTTTGTTTTTTGGCCTCTA	AGAATAATTGAGTAATCGAACTTGAAGTTCTATAGAACAGCTTGTATATGCGGATCCCCGGGTTAATTAA	AGGATTATGAGGATGTACACGCAGAGAATACAACATTGAGGGAAATTTTACGGATCCCCGGGTTAATTAA	CTTATAAACACAAATACCTACAGGCACTAAAGTTTGTTTTTTGGCCTCTAGAATTCGAGCTCGTTTAAAC	0		0		0
YCR095C	OCA4	3	299033	300121	-	AAGAGAGACACTTACAGCACTGGTGCGATCCATAACCTGAATTCATAATG	AAGAAAACGTTCCGGAAGAGCATCACTTTTATAGGGAACATATTTTTACA	AAAACGTTTATCATGAAATCATCTATACATATACGTAAAAATGTAAACTA	AAGAGAGACACTTACAGCACTGGTGCGATCCATAACCTGAATTCATAATGCGGATCCCCGGGTTAATTAA	AAGAAAACGTTCCGGAAGAGCATCACTTTTATAGGGAACATATTTTTACACGGATCCCCGGGTTAATTAA	AAAACGTTTATCATGAAATCATCTATACATATACGTAAAAATGTAAACTAGAATTCGAGCTCGTTTAAAC	0		0		0
YCR095W-A	YCR095W-A	3	300502	300660	+	AAAACTTTTAAAATATGATATTCAAAGCTTGAGCATTGGGCTTCTGGATG	TAAATAAAAAAAGTTCAATGCATGCCTTCCTATGCAAGATTTATAAAAGG	CACCGTCTTTAACTGCCTTTATTGAGATGTGGCTGCTCCTGACCTGTTCA	AAAACTTTTAAAATATGATATTCAAAGCTTGAGCATTGGGCTTCTGGATGCGGATCCCCGGGTTAATTAA	TAAATAAAAAAAGTTCAATGCATGCCTTCCTATGCAAGATTTATAAAAGGCGGATCCCCGGGTTAATTAA	CACCGTCTTTAACTGCCTTTATTGAGATGTGGCTGCTCCTGACCTGTTCAGAATTCGAGCTCGTTTAAAC	0		0		0
YCR096C	HMRA2,A2	3	304037	304396	-	AAACAACATCTCAACTCACTACTACCATTACTGTATTACTCAAAGAAATG	CAGAATTAGCGGACCTCTTGAGCGGTGAGCCTCTGGCAAAGAAGAAAGAA	TATATATATATATTCTACACAGATATATACATATTTGTTTTTCGGGCTCA	AAACAACATCTCAACTCACTACTACCATTACTGTATTACTCAAAGAAATGCGGATCCCCGGGTTAATTAA	CAGAATTAGCGGACCTCTTGAGCGGTGAGCCTCTGGCAAAGAAGAAAGAACGGATCCCCGGGTTAATTAA	TATATATATATATTCTACACAGATATATACATATTTGTTTTTCGGGCTCAGAATTCGAGCTCGTTTAAAC	0		0		0
YCR097W	HMRA1,YCR097WB	3	304693	305179	+	GTAAAACAATACATCTCCTTATATCAAAGAAAATCAAGAAGGACAACATG	TATCCTATACTAACAATTTGTAGTTCATAAATAAACGTATGAGATCTAAA	ACTAAAAGAAAAACCCGACTATGCTATTTTAATCATTGAAAACGAATTTA	GTAAAACAATACATCTCCTTATATCAAAGAAAATCAAGAAGGACAACATGCGGATCCCCGGGTTAATTAA	TATCCTATACTAACAATTTGTAGTTCATAAATAAACGTATGAGATCTAAACGGATCCCCGGGTTAATTAA	ACTAAAAGAAAAACCCGACTATGCTATTTTAATCATTGAAAACGAATTTAGAATTCGAGCTCGTTTAAAC	0		0		0
YCR097W-A	YCR097W-A	3	305297	305563	+	TTTTATAAACCCTGGTTTTGGTTTTGTAGAGTGGTTGACGAATAATTATG	ATGTAGTGACATTTTCTCTTAATCTTATACTAATTTCTATGACATTTATA	ATATTTCTCTCAAAGTTTGCAAAATTATGTTGATCATAAGTCTCTTCTTA	TTTTATAAACCCTGGTTTTGGTTTTGTAGAGTGGTTGACGAATAATTATGCGGATCCCCGGGTTAATTAA	ATGTAGTGACATTTTCTCTTAATCTTATACTAATTTCTATGACATTTATACGGATCCCCGGGTTAATTAA	ATATTTCTCTCAAAGTTTGCAAAATTATGTTGATCATAAGTCTCTTCTTAGAATTCGAGCTCGTTTAAAC	0		0		0
YCR098C	GIT1	3	309896	311452	-	GAGTTGATCTTTTTGCTTATAATCAAAAAAATAGAATAGGATAAAAAATG	GTAGTAAGAAAAACGCAGAAATAATTTCAGTCAGACAGGTCGATCAAAGT	AAAGAAATTTTGAGGTTAAAGGATGGAGGAAGAAATCGATACCAATTTCA	GAGTTGATCTTTTTGCTTATAATCAAAAAAATAGAATAGGATAAAAAATGCGGATCCCCGGGTTAATTAA	GTAGTAAGAAAAACGCAGAAATAATTTCAGTCAGACAGGTCGATCAAAGTCGGATCCCCGGGTTAATTAA	AAAGAAATTTTGAGGTTAAAGGATGGAGGAAGAAATCGATACCAATTTCAGAATTCGAGCTCGTTTAAAC	0		0		0
YCR099C	YCR099C	3	313679	314146	-	AGAAGGAAACAACACCAACATCTCATATATTGCAAGAAGTGTCCTGTATG	CGAATGGTAAGAAAATAGCAACCATTGAAAACAAGTTTGACTTTGAAATT	AGCATGATAAAAGATTCACGCAAAACTGTATCGAAATATTGATAAAATTA	AGAAGGAAACAACACCAACATCTCATATATTGCAAGAAGTGTCCTGTATGCGGATCCCCGGGTTAATTAA	CGAATGGTAAGAAAATAGCAACCATTGAAAACAAGTTTGACTTTGAAATTCGGATCCCCGGGTTAATTAA	AGCATGATAAAAGATTCACGCAAAACTGTATCGAAATATTGATAAAATTAGAATTCGAGCTCGTTTAAAC	1	YCR100C	1	YCR100C	0
YCR100C	YCR100C	3	314118	315068	-	TGAAGTCATATGTGGTCGTTTTAACGCAAGATGACGGGCATAACGAGATG	CATATATTGCAAGAAGTGTCCTGTATGCGATCGATTTTTCTGCTGCATTT	CTGCCAAATTCCAGTCTTCGAAATCTTCCTCTTCACACGTTTTATAGTCA	TGAAGTCATATGTGGTCGTTTTAACGCAAGATGACGGGCATAACGAGATGCGGATCCCCGGGTTAATTAA	CATATATTGCAAGAAGTGTCCTGTATGCGATCGATTTTTCTGCTGCATTTCGGATCCCCGGGTTAATTAA	CTGCCAAATTCCAGTCTTCGAAATCTTCCTCTTCACACGTTTTATAGTCAGAATTCGAGCTCGTTTAAAC	1	YCR099C	1	YCR099C	0
YCR101C	YCR101C	3	315329	315877	-	CTTTGAAAAAAAACTTTGAACTAAGAAAAGGTAAGAGATCCTCAATTATG	ATCCTTTTTTAAAATTAAACCTTCCTTGGAAAAGAAAAAAGACGACGATA	AAAGTCAGAATCCTTGCTAGACTTAATGAAATGACAGCTTTAAGTTGTTA	CTTTGAAAAAAAACTTTGAACTAAGAAAAGGTAAGAGATCCTCAATTATGCGGATCCCCGGGTTAATTAA	ATCCTTTTTTAAAATTAAACCTTCCTTGGAAAAGAAAAAAGACGACGATACGGATCCCCGGGTTAATTAA	AAAGTCAGAATCCTTGCTAGACTTAATGAAATGACAGCTTTAAGTTGTTAGAATTCGAGCTCGTTTAAAC	0		0		0
YCR102C	YCR102C	3	317207	318313	-	ACAATTACATATAACCTACAAACAGGCAAGTTGCAATTCCAGAAACCATG	ACATTAAAATCGGTAAGAACTCTGGTGAAAAACTAGTTGCCGTATTAAAC	TACGTAATAACTGTGTATACAAAAGAAAAATAATATCTGTTCGTCATCTA	ACAATTACATATAACCTACAAACAGGCAAGTTGCAATTCCAGAAACCATGCGGATCCCCGGGTTAATTAA	ACATTAAAATCGGTAAGAACTCTGGTGAAAAACTAGTTGCCGTATTAAACCGGATCCCCGGGTTAATTAA	TACGTAATAACTGTGTATACAAAAGAAAAATAATATCTGTTCGTCATCTAGAATTCGAGCTCGTTTAAAC	0		0		0
YCR102W-A	YCR102W-A	3	319581	319778	+	ATCAACTATTATGAATTCTCTAGAAAGTGGTTGCAAAGGAAATAAATATG	GGAAATACATCCAAGAAGCACAATTGAGCTCTAACGATGAACCGTTACCA	AATTGATACTCCTTGCAGCTTCTAAGTCAAAAGAAATGTCTCTATCTTTA	ATCAACTATTATGAATTCTCTAGAAAGTGGTTGCAAAGGAAATAAATATGCGGATCCCCGGGTTAATTAA	GGAAATACATCCAAGAAGCACAATTGAGCTCTAACGATGAACCGTTACCACGGATCCCCGGGTTAATTAA	AATTGATACTCCTTGCAGCTTCTAAGTCAAAAGAAATGTCTCTATCTTTAGAATTCGAGCTCGTTTAAAC	0		0		0
YCR104W	PAU3	3	320643	321017	+	TCTTTCCTGCTAAGCTTATATCAGCACTAACAAACAAAACAAATACAATG	CCATCTCCAGTGCTCTATCTAAGGACGGTATCTACACTGCTATTCCAAAA	TCGTTATTTTTCAATGTCTATGGAAGTTCATTAGTAAAGGCATGTCTCTA	TCTTTCCTGCTAAGCTTATATCAGCACTAACAAACAAAACAAATACAATGCGGATCCCCGGGTTAATTAA	CCATCTCCAGTGCTCTATCTAAGGACGGTATCTACACTGCTATTCCAAAACGGATCCCCGGGTTAATTAA	TCGTTATTTTTCAATGTCTATGGAAGTTCATTAGTAAAGGCATGTCTCTAGAATTCGAGCTCGTTTAAAC	0		0		0
YCR105W	ADH7,ADHVII	3	321912	322997	+	ATTGAAATAAAAAAAAACATAGAACCACTGAAAAATACAAAAAAAAAATG	ACGTCAAATACAGATTTACTTTGGTCGATTATGATAAGAAATTCCATAAA	ATTTGACATGCATTTTAAGAGATTCTGAAAAATATTACGTATATAGACTA	ATTGAAATAAAAAAAAACATAGAACCACTGAAAAATACAAAAAAAAAATGCGGATCCCCGGGTTAATTAA	ACGTCAAATACAGATTTACTTTGGTCGATTATGATAAGAAATTCCATAAACGGATCCCCGGGTTAATTAA	ATTTGACATGCATTTTAAGAGATTCTGAAAAATATTACGTATATAGACTAGAATTCGAGCTCGTTTAAAC	0		0		0
YCR106W	RDS1	3	323800	326298	+	GCGGTAGATAAACAAATGAACATGAAATTGGCTGCTGAAATGCTCTGATG	ATGCCTTCTGGGATTTATTAGGTGAAAATCTGAGCGATATGCCTTCTTTG	TTTTTGGCTTGTTTTTTTTTTTTTAGCCTTTCCAAATATCCGTATTCTCA	GCGGTAGATAAACAAATGAACATGAAATTGGCTGCTGAAATGCTCTGATGCGGATCCCCGGGTTAATTAA	ATGCCTTCTGGGATTTATTAGGTGAAAATCTGAGCGATATGCCTTCTTTGCGGATCCCCGGGTTAATTAA	TTTTTGGCTTGTTTTTTTTTTTTTAGCCTTTCCAAATATCCGTATTCTCAGAATTCGAGCTCGTTTAAAC	0		0		0
YCR107W	AAD3	3	326732	327823	+	AATTACTCTTTCGATCATCTAGAAGAAGCATATCCATCGTGCTTAAAATG	ATTTTATCGTGTTAAATTCCTTGACTCAAAAATATGGTACGAATAATGTT	TAACGTATTTACTGCTTTACTTGCGTAGTTGATTACTGAAAAATTATCTA	AATTACTCTTTCGATCATCTAGAAGAAGCATATCCATCGTGCTTAAAATGCGGATCCCCGGGTTAATTAA	ATTTTATCGTGTTAAATTCCTTGACTCAAAAATATGGTACGAATAATGTTCGGATCCCCGGGTTAATTAA	TAACGTATTTACTGCTTTACTTGCGTAGTTGATTACTGAAAAATTATCTAGAATTCGAGCTCGTTTAAAC	0		0		0
YCR108C	YCR108C	3	328839	329054	-	NNNNNNNNNNNNNNNNNNNNNNNNNNNNNNNNNNNNNNNNNNNNNNNNNN	NNNNNNNNNNNNNNNNNNNNNNNNNNNNNNNNNNNNNNNNNNNNNNCCCA	GCCCGCCGAATGAGATATAGATATTAAAATGTGGATAATCGTGGGCTTTA	NNNNNNNNNNNNNNNNNNNNNNNNNNNNNNNNNNNNNNNNNNNNNNNATGCGGATCCCCGGGTTAATTAA	NNNNNNNNNNNNNNNNNNNNNNNNNNNNNNNNNNNNNNNNNNNNNNCCCACGGATCCCCGGGTTAATTAA	GCCCGCCGAATGAGATATAGATATTAAAATGTGGATAATCGTGGGCTTTAGAATTCGAGCTCGTTTAAAC	0		0		0
YDL248W	COS7	4	2605	3756	+	ACTATCTCGAATAAAAAACNNNNNNNNNNNNNNNNNNNNNNNNNNNNNNN	ATATTAAAGAAGCGCAATTGTCCCGCAATGAAGAGTCTTTAATGAAGAAA	NNNNNNNNNNNNNNAAAGTATGAATTTTTAAGTCCAGAAGGGCGTTCTCA	ACTATCTCGAATAAAAAACNNNNNNNNNNNNNNNNNNNNNNNNNNNNATGCGGATCCCCGGGTTAATTAA	ATATTAAAGAAGCGCAATTGTCCCGCAATGAAGAGTCTTTAATGAAGAAACGGATCCCCGGGTTAATTAA	NNNNNNNNNNNNNNAAAGTATGAATTTTTAAGTCCAGAAGGGCGTTCTCAGAATTCGAGCTCGTTTAAAC	0		0		0
YDL247W-A	YDL247W-A	4	4566	4640	+	NNNNNNNNNNNNNNNNNNNNNNNNNNNNNNNNNNNNNNNNNNNNNNNNNN	NNNNNNNNNNNNNNNNNNNNNNNNNNNNNNNNNNNNNNNNNNNNNNNNNN	TAGTTAATTTGTTAACCAACGCGACTCCAGCTAACTGAGCGCANNNNNNN	NNNNNNNNNNNNNNNNNNNNNNNNNNNNNNNNNNNNNNNNNNNNNNNATGCGGATCCCCGGGTTAATTAA	NNNNNNNNNNNNNNNNNNNNNNNNNNNNNNNNNNNNNNNNNNNNNNNNNNCGGATCCCCGGGTTAATTAA	TAGTTAATTTGTTAACCAACGCGACTCCAGCTAACTGAGCGCANNNNNNNGAATTCGAGCTCGTTTAAAC	0		0		0
YDL247W	MPH2	4	6789	8619	+	NNNNNNNNNNNNNNNNNNNNNNNNNNNNNNNNNNNNNNNNNNNNNNNNNN	NNNNNNNNNNNNNNNNNNNNNNNNNNNNNNNNNNNNNNNNNNNNNNNNNN	NNNNNNNNNNNNNNNNNNNNNNNNNNNNNNNNNNNNNNNNNNNNNNNNNN	NNNNNNNNNNNNNNNNNNNNNNNNNNNNNNNNNNNNNNNNNNNNNNNATGCGGATCCCCGGGTTAATTAA	NNNNNNNNNNNNNNNNNNNNNNNNNNNNNNNNNNNNNNNNNNNNNNNNNNCGGATCCCCGGGTTAATTAA	NNNNNNNNNNNNNNNNNNNNNNNNNNNNNNNNNNNNNNNNNNNNNNNNNNGAATTCGAGCTCGTTTAAAC	0		0		0
YDL246C	SOR2	4	9488	10561	-	NNNNNNNNNNNNNNNNNNNNNNNNNNNNNNNNNNNNNNNNNNNNNNNNNN	NNNNNNNNNNNNNNNNNNNNNNNNNNNNNNNNNNNNNNNNNNNNNNNNNN	NNNNNNNNNNNNNNNNNNNNNNNNNNNNNNNNNNNNNNNNNNNNNNNNNN	NNNNNNNNNNNNNNNNNNNNNNNNNNNNNNNNNNNNNNNNNNNNNNNATGCGGATCCCCGGGTTAATTAA	NNNNNNNNNNNNNNNNNNNNNNNNNNNNNNNNNNNNNNNNNNNNNNNNNNCGGATCCCCGGGTTAATTAA	NNNNNNNNNNNNNNNNNNNNNNNNNNNNNNNNNNNNNNNNNNNNNNNNNNGAATTCGAGCTCGTTTAAAC	0		0		0
YDL245C	HXT15	4	12484	14187	-	NNNNNNNNNNNNNNNNNNNNNNNNNNNNNNNNNNNNNNNNNNNNNNNNNN	NNNNNNNNNNNNNNNNNNNNNNNNNNNNNNNNNNNNNNNNNNNNNNNNNN	NNNNNNNNNNNNNNNNNNNNNNNNNNNNNNNNNNNNNNNNNNNNNNNNNN	NNNNNNNNNNNNNNNNNNNNNNNNNNNNNNNNNNNNNNNNNNNNNNNATGCGGATCCCCGGGTTAATTAA	NNNNNNNNNNNNNNNNNNNNNNNNNNNNNNNNNNNNNNNNNNNNNNNNNNCGGATCCCCGGGTTAATTAA	NNNNNNNNNNNNNNNNNNNNNNNNNNNNNNNNNNNNNNNNNNNNNNNNNNGAATTCGAGCTCGTTTAAAC	0		0		0
YDL244W	THI13	4	17031	18053	+	TCAATTATATAAAAATACCACAACAACAATACACATACTTCCAAGCTATG	AAGAAAAATGCAGACAGGAAGGTACTTTCAAGAGATTGGCTCTTCCAGCT	AAACAAGTCGTAGAGGAAGGCTACGCTCGAGGAGTGACGAAGTGCGTTTA	TCAATTATATAAAAATACCACAACAACAATACACATACTTCCAAGCTATGCGGATCCCCGGGTTAATTAA	AAGAAAAATGCAGACAGGAAGGTACTTTCAAGAGATTGGCTCTTCCAGCTCGGATCCCCGGGTTAATTAA	AAACAAGTCGTAGAGGAAGGCTACGCTCGAGGAGTGACGAAGTGCGTTTAGAATTCGAGCTCGTTTAAAC	0		0		0
YDL243C	AAD4	4	18404	19393	-	CACTAATCTTAGGAGGAGCTTCACTTGGCGATGCATGGTCAGCCTTTATG	CCAAGAAGGCTTCACTTCTCACGGCAATGTCTGCGCAGATTTCCTTCGAT	ATATAAGGACATATTTCTTACACAAACGCACCAAAAAAGAAATCTGATTA	CACTAATCTTAGGAGGAGCTTCACTTGGCGATGCATGGTCAGCCTTTATGCGGATCCCCGGGTTAATTAA	CCAAGAAGGCTTCACTTCTCACGGCAATGTCTGCGCAGATTTCCTTCGATCGGATCCCCGGGTTAATTAA	ATATAAGGACATATTTCTTACACAAACGCACCAAAAAAGAAATCTGATTAGAATTCGAGCTCGTTTAAAC	0		0		0
YDL242W	YDL242W	4	19786	20139	+	CTGCTTACTAATTTTATGTTGACGGTTGAAAGCGGATTTTAAAACGTATG	GAGACCATGAGGTTAGACAATGTGAGGATACCAACTTCGGCTTCAAAATT	TTTTAAATAAGGCCGAACCTAAATGTTGCCTTCAAAATTAACCTGTATCA	CTGCTTACTAATTTTATGTTGACGGTTGAAAGCGGATTTTAAAACGTATGCGGATCCCCGGGTTAATTAA	GAGACCATGAGGTTAGACAATGTGAGGATACCAACTTCGGCTTCAAAATTCGGATCCCCGGGTTAATTAA	TTTTAAATAAGGCCGAACCTAAATGTTGCCTTCAAAATTAACCTGTATCAGAATTCGAGCTCGTTTAAAC	0		0		0
YDL241W	YDL241W	4	21452	21823	+	ATTTTTGCATCACACCCAAGAAAAATCTATAATAGAGACACAAAAAAATG	CTCTCGCCAAATTTACCATACTGTTCATGCTAGTGTTGTATACAATTGTC	TATGGTGGCTACTGCGACCACCAATCCAAAGTGTCATACCTTGAGAATTA	ATTTTTGCATCACACCCAAGAAAAATCTATAATAGAGACACAAAAAAATGCGGATCCCCGGGTTAATTAA	CTCTCGCCAAATTTACCATACTGTTCATGCTAGTGTTGTATACAATTGTCCGGATCCCCGGGTTAATTAA	TATGGTGGCTACTGCGACCACCAATCCAAAGTGTCATACCTTGAGAATTAGAATTCGAGCTCGTTTAAAC	0		0		0
YDL240C-A	YDL240C-A	4	23288	23425	-	GCCTTGGTTGGCTCGAGAGGAATGATTTACATATTTTAAATTCTCAAATG	AAAAAGATACTTACATAAAGATAAGGATATACTCGCCAAGATCGATTTCT	TTGCAGGTTAGCCCATCGCTACAACACCTCCCCACAAAGTATTTACTTCA	GCCTTGGTTGGCTCGAGAGGAATGATTTACATATTTTAAATTCTCAAATGCGGATCCCCGGGTTAATTAA	AAAAAGATACTTACATAAAGATAAGGATATACTCGCCAAGATCGATTTCTCGGATCCCCGGGTTAATTAA	TTGCAGGTTAGCCCATCGCTACAACACCTCCCCACAAAGTATTTACTTCAGAATTCGAGCTCGTTTAAAC	0		0		0
YDL240W	LRG1	4	23640	26693	+	AAAAAAGAGCAGACAAATTATCAAACAACAAGTACCGGAGGTGAGCAATG	TCACAGTCAAAGATTCGACCACAACGGTCATACAAGGTGAAATAAACAAA	GGAGAAGAAAAAAAGGAAAATGAGGGGAAACTTACAGTTTCTGCCTATTA	AAAAAAGAGCAGACAAATTATCAAACAACAAGTACCGGAGGTGAGCAATGCGGATCCCCGGGTTAATTAA	TCACAGTCAAAGATTCGACCACAACGGTCATACAAGGTGAAATAAACAAACGGATCCCCGGGTTAATTAA	GGAGAAGAAAAAAAGGAAAATGAGGGGAAACTTACAGTTTCTGCCTATTAGAATTCGAGCTCGTTTAAAC	0		0		0
YDL239C	ADY3	4	27221	29593	-	TTTGGGATTTTGAATGGGATAGTTGAATACAACAAACTTCTCCGAATATG	AGCATCCTCTTGAGTATGATTTGCAAGCGTTGTTTAAATATTTCTTTTCT	TTAATGACACCATTGAATATATTAGTTCTAAATAAAAAAAAAAAAAGCTA	TTTGGGATTTTGAATGGGATAGTTGAATACAACAAACTTCTCCGAATATGCGGATCCCCGGGTTAATTAA	AGCATCCTCTTGAGTATGATTTGCAAGCGTTGTTTAAATATTTCTTTTCTCGGATCCCCGGGTTAATTAA	TTAATGACACCATTGAATATATTAGTTCTAAATAAAAAAAAAAAAAGCTAGAATTCGAGCTCGTTTAAAC	0		0		0
YDL238C	GUD1	4	29803	31272	-	CATTTTATTGAATGAATATATGAATTGGGCTGTCCTTTGAAGAGGATATG	ATCGCAACACCACTAAAGTTTGGGTAGCCGGCCAGCAAGTCTACCAGATT	TCATTAATACTTGGAACAAGATATAGTAGCCCTCTAAACATATACAACTA	CATTTTATTGAATGAATATATGAATTGGGCTGTCCTTTGAAGAGGATATGCGGATCCCCGGGTTAATTAA	ATCGCAACACCACTAAAGTTTGGGTAGCCGGCCAGCAAGTCTACCAGATTCGGATCCCCGGGTTAATTAA	TCATTAATACTTGGAACAAGATATAGTAGCCCTCTAAACATATACAACTAGAATTCGAGCTCGTTTAAAC	0		0		0
YDL237W	YDL237W	4	31475	32647	+	ACTCGAGATAAGACCAACAAAGATAAGTACCTCGGTTTAGTTAAGCGATG	GTTCCGATTTACTTAACCTGGACAATTTATTCATGGCATCGTCATTGATA	AATGTTTATATAAATATATGGCTTTTCTTATCCACAGCTCAAGCCACTTA	ACTCGAGATAAGACCAACAAAGATAAGTACCTCGGTTTAGTTAAGCGATGCGGATCCCCGGGTTAATTAA	GTTCCGATTTACTTAACCTGGACAATTTATTCATGGCATCGTCATTGATACGGATCCCCGGGTTAATTAA	AATGTTTATATAAATATATGGCTTTTCTTATCCACAGCTCAAGCCACTTAGAATTCGAGCTCGTTTAAAC	0		0		0
YDL236W	PHO13	4	33114	34052	+	AAAAAGCCTTATAGCTTGCCCTGACAAAGAATATACAACTCGGGAAAATG	TTTACATTGATAAACTTGGTGACATCTACGCCTTAACCAATAATGAGTTA	TTTCCTTTTCAAAAAGTAATTCTACCCCTAGATTTTGCATTGCTCCTCTA	AAAAAGCCTTATAGCTTGCCCTGACAAAGAATATACAACTCGGGAAAATGCGGATCCCCGGGTTAATTAA	TTTACATTGATAAACTTGGTGACATCTACGCCTTAACCAATAATGAGTTACGGATCCCCGGGTTAATTAA	TTTCCTTTTCAAAAAGTAATTCTACCCCTAGATTTTGCATTGCTCCTCTAGAATTCGAGCTCGTTTAAAC	0		0		0
YDL235C	YPD1	4	34231	34734	-	AAGAAATAACAACACTCGTTCTCGGAAACAAGAAAATACACACAATAATG	AGTTCAAACTGGCGAGAATTGAGTTATCTAAATATTACAACACAAACCTA	TCCGGGGAAGAATGGATTATCCGGAGGTGTGAATAAAATGATGACGATTA	AAGAAATAACAACACTCGTTCTCGGAAACAAGAAAATACACACAATAATGCGGATCCCCGGGTTAATTAA	AGTTCAAACTGGCGAGAATTGAGTTATCTAAATATTACAACACAAACCTACGGATCCCCGGGTTAATTAA	TCCGGGGAAGAATGGATTATCCGGAGGTGTGAATAAAATGATGACGATTAGAATTCGAGCTCGTTTAAAC	0		0		0
YDL234C	GYP7	4	35053	37293	-	TTGCACAAATTGGCAAAGTTCTACAAGAGTCATTCATACATCCCCTGATG	AAAAACCTATCATAAGACATGAAGGGCAAAGGAGCAAAAATTCCGTTAAA	ATTATATCTCCGGTATTCAATATGTAAAGTTCCGTTTCTATTTACCACTA	TTGCACAAATTGGCAAAGTTCTACAAGAGTCATTCATACATCCCCTGATGCGGATCCCCGGGTTAATTAA	AAAAACCTATCATAAGACATGAAGGGCAAAGGAGCAAAAATTCCGTTAAACGGATCCCCGGGTTAATTAA	ATTATATCTCCGGTATTCAATATGTAAAGTTCCGTTTCTATTTACCACTAGAATTCGAGCTCGTTTAAAC	0		0		0
YDL233W	YDL233W	4	37613	38989	+	TTGACACTGTTCATGGGGCAGAAGGAAAAGCAAAGATTATCTGCAATATG	GTGATGTGAATGATATTAACAAAGACATGACAAAAAAGATGATGAAGTTT	GCAATTCTCTTAATATTTCAATGGGTGACGTTAGGTAATTACCTTCTTTA	TTGACACTGTTCATGGGGCAGAAGGAAAAGCAAAGATTATCTGCAATATGCGGATCCCCGGGTTAATTAA	GTGATGTGAATGATATTAACAAAGACATGACAAAAAAGATGATGAAGTTTCGGATCCCCGGGTTAATTAA	GCAATTCTCTTAATATTTCAATGGGTGACGTTAGGTAATTACCTTCTTTAGAATTCGAGCTCGTTTAAAC	0		0		0
YDL232W	OST4	4	39303	39413	+	TTACACTTGCAAGTCAGTAGAGAAACCCAGTACAGAGCAAGCAAAAGATG	CTTTAATTGTCATTTACCATGCTGTTGACTCCACCATGTCTCCTAAGAAC	AGCGACGTATAATAAAAACTGAAGTTCGCTATCCAAATGTAACCACTTTA	TTACACTTGCAAGTCAGTAGAGAAACCCAGTACAGAGCAAGCAAAAGATGCGGATCCCCGGGTTAATTAA	CTTTAATTGTCATTTACCATGCTGTTGACTCCACCATGTCTCCTAAGAACCGGATCCCCGGGTTAATTAA	AGCGACGTATAATAAAAACTGAAGTTCGCTATCCAAATGTAACCACTTTAGAATTCGAGCTCGTTTAAAC	0		0		0
YDL231C	BRE4	4	39683	43060	-	CTAAGGAAAGCATGTACAGTATAGTGCTGGAATTGTAACAGGTCCTCATG	TGTTCCAGGTAGAGAGTTGTGCAAAAGATATACTGGGCGAAGAAAACTTT	TCATTATTAATAAAAAGAATTCCTATACATATATTCAAAAACAAATGTTA	CTAAGGAAAGCATGTACAGTATAGTGCTGGAATTGTAACAGGTCCTCATGCGGATCCCCGGGTTAATTAA	TGTTCCAGGTAGAGAGTTGTGCAAAAGATATACTGGGCGAAGAAAACTTTCGGATCCCCGGGTTAATTAA	TCATTATTAATAAAAAGAATTCCTATACATATATTCAAAAACAAATGTTAGAATTCGAGCTCGTTTAAAC	0		0		0
YDL230W	PTP1	4	43516	44523	+	GAGTTATCAAGAAAAGCGTTTGTTAGTAGTAGTTTGCGACAGTGGAGATG	TATTTATCTACCATGCTGCCAAGTATCTTAACAGTCTTTCCGTGAACCAA	GTATTGTTATTGAAAAAATGCACAATTAGGAACTTTTATATAGCTGTCTA	GAGTTATCAAGAAAAGCGTTTGTTAGTAGTAGTTTGCGACAGTGGAGATGCGGATCCCCGGGTTAATTAA	TATTTATCTACCATGCTGCCAAGTATCTTAACAGTCTTTCCGTGAACCAACGGATCCCCGGGTTAATTAA	GTATTGTTATTGAAAAAATGCACAATTAGGAACTTTTATATAGCTGTCTAGAATTCGAGCTCGTTTAAAC	0		0		0
YDL229W	SSB1,YG101	4	44881	46722	+	GGATTTTCAGATGTCCCAAGATCATTACAGTATTTTAATTGAACAAAATG	AGGCTGAAGTTGGTTTGAAGAGAGTTGTCACCAAGGCCATGTCTTCTCGT	TTATATACAATATAAGTAATATTCATATATATGTGATGAATGCAGTCTTA	GGATTTTCAGATGTCCCAAGATCATTACAGTATTTTAATTGAACAAAATGCGGATCCCCGGGTTAATTAA	AGGCTGAAGTTGGTTTGAAGAGAGTTGTCACCAAGGCCATGTCTTCTCGTCGGATCCCCGGGTTAATTAA	TTATATACAATATAAGTAATATTCATATATATGTGATGAATGCAGTCTTAGAATTCGAGCTCGTTTAAAC	1	YDL228C	1	YDL228C	0
YDL228C	YDL228C	4	46093	46734	-	AGAAAACAAAATTTATATACAATATAAGTAATATTCATATATATGTGATG	GTGTTTCTTGGAACAACGATACCGAACATGTCACCTTGCATACCAACACC	CTGACGAAACCAAGGACTTGTTGTTGTTAGATGTTGCTCCATTATCTCTA	AGAAAACAAAATTTATATACAATATAAGTAATATTCATATATATGTGATGCGGATCCCCGGGTTAATTAA	GTGTTTCTTGGAACAACGATACCGAACATGTCACCTTGCATACCAACACCCGGATCCCCGGGTTAATTAA	CTGACGAAACCAAGGACTTGTTGTTGTTAGATGTTGCTCCATTATCTCTAGAATTCGAGCTCGTTTAAAC	1	YDL229W	1	YDL229W	0
YDL227C	HO	4	47087	48847	-	AAATCCATATCCTCATAAGCAGCAATCAATTCTATCTATACTTTAAAATG	TCCGCGGGCCTCATAAGAGTTGTGGTAACAACGCAGGTGCGCGCATCTGC	AAATTTTACTTTTATTACATACAACTTTTTAAACTAATATACACATTTTA	AAATCCATATCCTCATAAGCAGCAATCAATTCTATCTATACTTTAAAATGCGGATCCCCGGGTTAATTAA	TCCGCGGGCCTCATAAGAGTTGTGGTAACAACGCAGGTGCGCGCATCTGCCGGATCCCCGGGTTAATTAA	AAATTTTACTTTTATTACATACAACTTTTTAAACTAATATACACATTTTAGAATTCGAGCTCGTTTAAAC	0		0		0
YDL226C	GCS1	4	51931	52989	-	GAGTTTAAATGGTGCCAATTGAGCAATTTTATCGCGGATTATAGAGCATG	ATAATAACGATAAGAAGAATGAACAGGACGAGGACAAATGGGACGATTTC	AATGTGAATTGAACTTTCCTTGAATGTTGAGAAAAACTATATTAAAATTA	GAGTTTAAATGGTGCCAATTGAGCAATTTTATCGCGGATTATAGAGCATGCGGATCCCCGGGTTAATTAA	ATAATAACGATAAGAAGAATGAACAGGACGAGGACAAATGGGACGATTTCCGGATCCCCGGGTTAATTAA	AATGTGAATTGAACTTTCCTTGAATGTTGAGAAAAACTATATTAAAATTAGAATTCGAGCTCGTTTAAAC	0		0		0
YDL225W	SHS1,SEP7	4	53261	54916	+	AGCCCCAAAGATCTGCTTATAATTGCTAGAAAAATATATTATTAATCATG	AAAAAAATGACACGTATACTGATTTAGCCTCTATTGCATCGGGTAGAGAT	TATTTATTTATTTATTTGCTCAGCTTTGGATTTTGTACAGATACAACTCA	AGCCCCAAAGATCTGCTTATAATTGCTAGAAAAATATATTATTAATCATGCGGATCCCCGGGTTAATTAA	AAAAAAATGACACGTATACTGATTTAGCCTCTATTGCATCGGGTAGAGATCGGATCCCCGGGTTAATTAA	TATTTATTTATTTATTTGCTCAGCTTTGGATTTTGTACAGATACAACTCAGAATTCGAGCTCGTTTAAAC	0		0		0
YDL224C	WHI4	4	55213	57162	-	TGCCACATCTACGCTGAAAAATAACGCTTAAGGTTTCTCAATTAACAATG	ACAGTAGGAGTAAATCTGGTTACAGCTTTAATGGAAGTTACGGGAAATCA	GTCAGAAAGTAAAGCAAAAGAAAATTAATAAAGCAATACTAAATCTATCA	TGCCACATCTACGCTGAAAAATAACGCTTAAGGTTTCTCAATTAACAATGCGGATCCCCGGGTTAATTAA	ACAGTAGGAGTAAATCTGGTTACAGCTTTAATGGAAGTTACGGGAAATCACGGATCCCCGGGTTAATTAA	GTCAGAAAGTAAAGCAAAAGAAAATTAATAAAGCAATACTAAATCTATCAGAATTCGAGCTCGTTTAAAC	0		0		0
YDL223C	HBT1	4	58081	62115	-	AAGATTTCCCAGTGGAGAGCTATCAAGAATATCACCCAACCCAAGATATG	GAGTGAGAAAAAGTATTTCTGGCGGTACTTTTGGATTTAGGAGTGAAATT	AAAAATAGATTTCAAAGAATACTGGGAATTTGTTAATCGAGAAGTGTTTA	AAGATTTCCCAGTGGAGAGCTATCAAGAATATCACCCAACCCAAGATATGCGGATCCCCGGGTTAATTAA	GAGTGAGAAAAAGTATTTCTGGCGGTACTTTTGGATTTAGGAGTGAAATTCGGATCCCCGGGTTAATTAA	AAAAATAGATTTCAAAGAATACTGGGAATTTGTTAATCGAGAAGTGTTTAGAATTCGAGCTCGTTTAAAC	0		0		0
YDL222C	FMP45	4	62582	63511	-	CTTTTTATCCAAGTAACAAGTAACACTAATCACTATAATCTACCGCTATG	TAGAACCAGCTGGGGATGGTGGTCTTGCCGGGCCAGTGACGGTACGCGAC	GGAAGAAAAAAAAAATTAGGAAGTATTTTATGGTGATTATTTCCTTCCTA	CTTTTTATCCAAGTAACAAGTAACACTAATCACTATAATCTACCGCTATGCGGATCCCCGGGTTAATTAA	TAGAACCAGCTGGGGATGGTGGTCTTGCCGGGCCAGTGACGGTACGCGACCGGATCCCCGGGTTAATTAA	GGAAGAAAAAAAAAATTAGGAAGTATTTTATGGTGATTATTTCCTTCCTAGAATTCGAGCTCGTTTAAAC	0		0		0
YDL221W	YDL221W	4	63721	64272	+	AACTGTTGCAAAGCAACCATCCTTTTATATGTCGGCATCTGCGCCGAATG	ATGAATGGCCGAGAAATTGTGCCAATTGCGTATATTTTTCCTCAAGAGGC	AAGAACTTTGCTTATTTTTTCAACCGCTCAAGCGCCTACTTACAGCGTCA	AACTGTTGCAAAGCAACCATCCTTTTATATGTCGGCATCTGCGCCGAATGCGGATCCCCGGGTTAATTAA	ATGAATGGCCGAGAAATTGTGCCAATTGCGTATATTTTTCCTCAAGAGGCCGGATCCCCGGGTTAATTAA	AAGAACTTTGCTTATTTTTTCAACCGCTCAAGCGCCTACTTACAGCGTCAGAATTCGAGCTCGTTTAAAC	1	YDL220C	1	YDL220C	0
YDL220C	CDC13,EST4	4	63954	66728	-	TATGTTTCTCTTTGGATACGAATGACCGTGGAAACTATCGCCTAAAAATG	TGAAAAAGGAGGAGGATAATGACGATGACGCCGGAGCCGTTCCCACCTCG	CGTCACTGCAATTTGGCACCGCCGCGTTGGGCTGCGCGGATCATGTCTTA	TATGTTTCTCTTTGGATACGAATGACCGTGGAAACTATCGCCTAAAAATGCGGATCCCCGGGTTAATTAA	TGAAAAAGGAGGAGGATAATGACGATGACGCCGGAGCCGTTCCCACCTCGCGGATCCCCGGGTTAATTAA	CGTCACTGCAATTTGGCACCGCCGCGTTGGGCTGCGCGGATCATGTCTTAGAATTCGAGCTCGTTTAAAC	1	YDL221W	1	YDL221W	0
YDL219W	DTD1	4	66952	67475	+	CATGTACATATTAAATAATCCACATATTATTCAGCAGCGGATTTACAATG	GCTCTTTAACTAATGAAGGGCCCGTTACAATCATTCTTGACAGTGACCAA	AATGTTTGCTTTTTATTTTCTTCTCGTATATATCTATAAGGTCAATCTTA	CATGTACATATTAAATAATCCACATATTATTCAGCAGCGGATTTACAATGCGGATCCCCGGGTTAATTAA	GCTCTTTAACTAATGAAGGGCCCGTTACAATCATTCTTGACAGTGACCAACGGATCCCCGGGTTAATTAA	AATGTTTGCTTTTTATTTTCTTCTCGTATATATCTATAAGGTCAATCTTAGAATTCGAGCTCGTTTAAAC	0		0		0
YDL218W	YDL218W	4	68203	69156	+	TTTTCAATTGAGGAACATAAACCAAATAGATATATTATATCAACGTTATG	CTATGAGTGGTAGCACTGCAGAACCAAACAGGAACGTCAATCAAATGCCA	AAAAAGTATGTGAAGGGTATAGACGAACAAAAAGGAAATCATTGAATTTA	TTTTCAATTGAGGAACATAAACCAAATAGATATATTATATCAACGTTATGCGGATCCCCGGGTTAATTAA	CTATGAGTGGTAGCACTGCAGAACCAAACAGGAACGTCAATCAAATGCCACGGATCCCCGGGTTAATTAA	AAAAAGTATGTGAAGGGTATAGACGAACAAAAAGGAAATCATTGAATTTAGAATTCGAGCTCGTTTAAAC	0		0		0
YDL217C	TIM22	4	69693	70316	-	TGCCAAATAAGATCAAGAAATTGTGATTTTAAATACTTTATACGAAGATG	TGTATATGAAAAGTGAGGATGGTAGACCACCTCAAAACGATTTTAAAGAA	TGATATTTACAAATATAAAACATTCATCGTTCGTCGAAATTGGCTATTCA	TGCCAAATAAGATCAAGAAATTGTGATTTTAAATACTTTATACGAAGATGCGGATCCCCGGGTTAATTAA	TGTATATGAAAAGTGAGGATGGTAGACCACCTCAAAACGATTTTAAAGAACGGATCCCCGGGTTAATTAA	TGATATTTACAAATATAAAACATTCATCGTTCGTCGAAATTGGCTATTCAGAATTCGAGCTCGTTTAAAC	0		0		0
YDL216C	RRI1,JAB1,CSN5	4	70707	72029	-	AAATGAATAACAACGATCGAAAATCAATAAAAACTGCAGGAGGCAGCATG	AGATAAAACAATATGAGCGGTTACGTTTTTACAAGGACACCTTTACATTA	CAGATAAACATAAGCTATTGCAGCGTCATTGGAGCAACGTTAGGAATTCA	AAATGAATAACAACGATCGAAAATCAATAAAAACTGCAGGAGGCAGCATGCGGATCCCCGGGTTAATTAA	AGATAAAACAATATGAGCGGTTACGTTTTTACAAGGACACCTTTACATTACGGATCCCCGGGTTAATTAA	CAGATAAACATAAGCTATTGCAGCGTCATTGGAGCAACGTTAGGAATTCAGAATTCGAGCTCGTTTAAAC	0		0		0
YDL215C	GDH2,GDHB,GDH-B	4	72350	75628	-	CATACAAAACAAGGATATTAAATTCACAACAATAAAAAGAATAAAGAATG	AATTCTTGGAATTTATTGGTGGGTTAAAAAGAGAAGCGGAGGCAAGTGCT	CTTTTCTGACGGCAGAACTAATTTATACAAAACAATTTTATTGAAGCTCA	CATACAAAACAAGGATATTAAATTCACAACAATAAAAAGAATAAAGAATGCGGATCCCCGGGTTAATTAA	AATTCTTGGAATTTATTGGTGGGTTAAAAAGAGAAGCGGAGGCAAGTGCTCGGATCCCCGGGTTAATTAA	CTTTTCTGACGGCAGAACTAATTTATACAAAACAATTTTATTGAAGCTCAGAATTCGAGCTCGTTTAAAC	0		0		0
YDL214C	PRR2	4	76156	78255	-	AACGTTCACAATAGCGTACGTAATCCTTTTACTTATCATACGGAGTGATG	CAAACATCGATCAACGATACGCCCACATTGGCGGCCTGCATCAGCGAACG	AGTAAAAGCTGGAGCATATGGCCAGTATGACATTGCTATTCTTCCAGTTA	AACGTTCACAATAGCGTACGTAATCCTTTTACTTATCATACGGAGTGATGCGGATCCCCGGGTTAATTAA	CAAACATCGATCAACGATACGCCCACATTGGCGGCCTGCATCAGCGAACGCGGATCCCCGGGTTAATTAA	AGTAAAAGCTGGAGCATATGGCCAGTATGACATTGCTATTCTTCCAGTTAGAATTCGAGCTCGTTTAAAC	0		0		0
YDL213C	NOP6	4	78999	79676	-	ATCTAATGTAGAGGACAGGATAGAGATTGAAGACGTCTACAGCTAAAATG	ACAAGCCTGTTCCTGCAGGAATTCATCCTGATAGAGCCAAACTACTTAAA	ATTTTCTTTTTGTCTAAGATACATGGCGTATAAAATTAAATTTGTACTCA	ATCTAATGTAGAGGACAGGATAGAGATTGAAGACGTCTACAGCTAAAATGCGGATCCCCGGGTTAATTAA	ACAAGCCTGTTCCTGCAGGAATTCATCCTGATAGAGCCAAACTACTTAAACGGATCCCCGGGTTAATTAA	ATTTTCTTTTTGTCTAAGATACATGGCGTATAAAATTAAATTTGTACTCAGAATTCGAGCTCGTTTAAAC	0		0		0
YDL212W	SHR3,APF1	4	80136	80768	+	ATTGGACTACAGAGCATAAAATCCCGTGATACGATAAAACTCTAACGATG	AGAATGATAACAAATCTAAAGGTGCTCAAAAGAGGAAGAACGCCAAAAAA	GACGGGAAAAGAGGGACAAAAAGAGAAAATGTTAAAAATATTATGGCCTA	ATTGGACTACAGAGCATAAAATCCCGTGATACGATAAAACTCTAACGATGCGGATCCCCGGGTTAATTAA	AGAATGATAACAAATCTAAAGGTGCTCAAAAGAGGAAGAACGCCAAAAAACGGATCCCCGGGTTAATTAA	GACGGGAAAAGAGGGACAAAAAGAGAAAATGTTAAAAATATTATGGCCTAGAATTCGAGCTCGTTTAAAC	0		0		0
YDL211C	YDL211C	4	81004	82122	-	AAAGGCGCGAGGCATCTTGATAATTCTTTCTATTGCGATACTTCGCCATG	TTACTCGGCCAAATATTCAGCAAACCAATAGCTTTTTGAGAGAAATTATT	GCCTTGTTTAGAAGTACGAAAATCTTGGAATCCACTTTTTTCTATTTTTA	AAAGGCGCGAGGCATCTTGATAATTCTTTCTATTGCGATACTTCGCCATGCGGATCCCCGGGTTAATTAA	TTACTCGGCCAAATATTCAGCAAACCAATAGCTTTTTGAGAGAAATTATTCGGATCCCCGGGTTAATTAA	GCCTTGTTTAGAAGTACGAAAATCTTGGAATCCACTTTTTTCTATTTTTAGAATTCGAGCTCGTTTAAAC	0		0		0
YDL210W	UGA4	4	85980	87695	+	TTCAGTTGTGAAGTGTAACAAGGTCTTATAATTTATTATTACTAACAATG	AAGCCGTTGGTGCTGATGTTATCGACACAATTATGTCCAAACAGGAACCA	AGACCTTATAAACTCTGAATATAAAATCTTTATAAAGGTTTGAACATTTA	TTCAGTTGTGAAGTGTAACAAGGTCTTATAATTTATTATTACTAACAATGCGGATCCCCGGGTTAATTAA	AAGCCGTTGGTGCTGATGTTATCGACACAATTATGTCCAAACAGGAACCACGGATCCCCGGGTTAATTAA	AGACCTTATAAACTCTGAATATAAAATCTTTATAAAGGTTTGAACATTTAGAATTCGAGCTCGTTTAAAC	0		0		0
YDL209C	CWC2,NTC40	4	87917	88936	-	GTAGTAACGACGTTAGTAAGACAGTATACGCATTGATAGAAATTTGGATG	TTGGTAAGCTTGGTGGTCCCTTGCTCGATTACCTCTCCTCTGATGAGGAT	AATGTTAATGGCAGATACTTAGAATTTGGTGGAAACGATTTTCTTCTCTA	GTAGTAACGACGTTAGTAAGACAGTATACGCATTGATAGAAATTTGGATGCGGATCCCCGGGTTAATTAA	TTGGTAAGCTTGGTGGTCCCTTGCTCGATTACCTCTCCTCTGATGAGGATCGGATCCCCGGGTTAATTAA	AATGTTAATGGCAGATACTTAGAATTTGGTGGAAACGATTTTCTTCTCTAGAATTCGAGCTCGTTTAAAC	0		0		0
YDL208W	NHP2	4	89222	89692	+	TCAATGGATCATTGGGTAGCAGAGAAACGGAAACAAGTGCAGTAAAAATG	AAGAATACAAGGAATCTTTCAACGAAGTTGTCAAAGAAGTTCAAGCTTTA	TTTTTATTTCTTCTAGATTTCTAATATGGTTAAGAAGCGAACTTTTTTCA	TCAATGGATCATTGGGTAGCAGAGAAACGGAAACAAGTGCAGTAAAAATGCGGATCCCCGGGTTAATTAA	AAGAATACAAGGAATCTTTCAACGAAGTTGTCAAAGAAGTTCAAGCTTTACGGATCCCCGGGTTAATTAA	TTTTTATTTCTTCTAGATTTCTAATATGGTTAAGAAGCGAACTTTTTTCAGAATTCGAGCTCGTTTAAAC	0		0		0
YDL207W	GLE1,BRR3,RSS1	4	89958	91574	+	AAGAGAATCGCGGGCCGTTGCTACAGGATATTCTGCAGAGTCGAAGAATG	TAGAGGCCTGGCAAAATAATAATATGGAGTCCTTTCCGGAAATGTCTCCT	ATTATAAAGTGTATTAGCATAATGTGCATATATAAGTTCAGAATTTTCTA	AAGAGAATCGCGGGCCGTTGCTACAGGATATTCTGCAGAGTCGAAGAATGCGGATCCCCGGGTTAATTAA	TAGAGGCCTGGCAAAATAATAATATGGAGTCCTTTCCGGAAATGTCTCCTCGGATCCCCGGGTTAATTAA	ATTATAAAGTGTATTAGCATAATGTGCATATATAAGTTCAGAATTTTCTAGAATTCGAGCTCGTTTAAAC	0		0		0
YDL206W	YDL206W	4	91886	94174	+	CTTTATTTGTAAATGCTACTCTTCATTTATCAAATTTTTTAAAGCAGATG	TGTATATAGTTGTCACATGTATTAGTGTTTTTTTAGAAGTTCACCAAGTG	TATTTATTATAGCTTGTATATAAAAAATGAAATCTTGATTTATTAAATTA	CTTTATTTGTAAATGCTACTCTTCATTTATCAAATTTTTTAAAGCAGATGCGGATCCCCGGGTTAATTAA	TGTATATAGTTGTCACATGTATTAGTGTTTTTTTAGAAGTTCACCAAGTGCGGATCCCCGGGTTAATTAA	TATTTATTATAGCTTGTATATAAAAAATGAAATCTTGATTTATTAAATTAGAATTCGAGCTCGTTTAAAC	0		0		0
YDL205C	HEM3	4	94472	95455	-	GCGAAGAAAATCTAGATAAATTTGTAGTTGGTAAATACACACGTACTATG	CCGATGGCGCAAAGAAAATTCTGGATGAAATTAATTTAGACAGAATCAAA	TTTAGTTAGTAATAATAGAGTTTTTGGACTGATCAAATTAATGGTGTTCA	GCGAAGAAAATCTAGATAAATTTGTAGTTGGTAAATACACACGTACTATGCGGATCCCCGGGTTAATTAA	CCGATGGCGCAAAGAAAATTCTGGATGAAATTAATTTAGACAGAATCAAACGGATCCCCGGGTTAATTAA	TTTAGTTAGTAATAATAGAGTTTTTGGACTGATCAAATTAATGGTGTTCAGAATTCGAGCTCGTTTAAAC	0		0		0
YDL204W	RTN2	4	96315	97496	+	TAACTTGTTCAATTGCTTGTCTCAACTTGCCACAAACTATCATCAACATG	AAACCTTACACAAAACCACGCACGGCCTAAAGCAAAAATTGCAACACGCA	AAATGAACTACTAGCTAGAAAGAAGAGAGAAAAAAAAAAAAACTAGATTA	TAACTTGTTCAATTGCTTGTCTCAACTTGCCACAAACTATCATCAACATGCGGATCCCCGGGTTAATTAA	AAACCTTACACAAAACCACGCACGGCCTAAAGCAAAAATTGCAACACGCACGGATCCCCGGGTTAATTAA	AAATGAACTACTAGCTAGAAAGAAGAGAGAAAAAAAAAAAAACTAGATTAGAATTCGAGCTCGTTTAAAC	0		0		0
YDL203C	ACK1	4	97792	99663	-	CAGAGTGTACCACCACGTTTTAATACTTTGTTTTAATACAGTAGGCAATG	CAAGAATGGGATTCAGGAAGGCAGTTGATGCTCTTCGAAGTTTGACAAAT	TCCTGAATAATATTTGATTTATGGCATAATAAAGAAATGCGAATTCGTTA	CAGAGTGTACCACCACGTTTTAATACTTTGTTTTAATACAGTAGGCAATGCGGATCCCCGGGTTAATTAA	CAAGAATGGGATTCAGGAAGGCAGTTGATGCTCTTCGAAGTTTGACAAATCGGATCCCCGGGTTAATTAA	TCCTGAATAATATTTGATTTATGGCATAATAAAGAAATGCGAATTCGTTAGAATTCGAGCTCGTTTAAAC	0		0		0
YDL202W	MRPL11	4	100185	100934	+	TTTAGACCTTATTGGAAGTGCTTGGGCGCGGAGTGTGATTATAAATAATG	CTAAAGAGGATGTGGAGTCAACTACAGATGCAGAATCGAAGGGATCAAAG	AATAGTAAAACCTTTATAAAACTTGTCGAATTACGGGCATTTTCTTTTTA	TTTAGACCTTATTGGAAGTGCTTGGGCGCGGAGTGTGATTATAAATAATGCGGATCCCCGGGTTAATTAA	CTAAAGAGGATGTGGAGTCAACTACAGATGCAGAATCGAAGGGATCAAAGCGGATCCCCGGGTTAATTAA	AATAGTAAAACCTTTATAAAACTTGTCGAATTACGGGCATTTTCTTTTTAGAATTCGAGCTCGTTTAAAC	0		0		0
YDL201W	TRM8	4	101271	102131	+	ATTCAGCAGTTCCCATAGGATAAAATTTTCAAGCGTTTATTGTTAAGATG	GTGACAAGTTCGTCGCTTGTTTCACAAGATTACCAACGCCAGCCATATTG	GAAATAGTTATGTATATGTGGTAAATTGTTCTAGTTATACATCTATGTTA	ATTCAGCAGTTCCCATAGGATAAAATTTTCAAGCGTTTATTGTTAAGATGCGGATCCCCGGGTTAATTAA	GTGACAAGTTCGTCGCTTGTTTCACAAGATTACCAACGCCAGCCATATTGCGGATCCCCGGGTTAATTAA	GAAATAGTTATGTATATGTGGTAAATTGTTCTAGTTATACATCTATGTTAGAATTCGAGCTCGTTTAAAC	0		0		0
YDL200C	MGT1,MGMT	4	102211	102777	-	AAAAAAAAATTGAAAACGGTCGCATTTTTGATCTAAATGGACCAACGATG	AACAGTTATTAAATAATGAAAAGGAAAATAGCTTAAGCCTTAGTAGATTG	ATACATAACTATTTCTTATGTTTATTTTCCTAAAATCCTTTATCCAACTA	AAAAAAAAATTGAAAACGGTCGCATTTTTGATCTAAATGGACCAACGATGCGGATCCCCGGGTTAATTAA	AACAGTTATTAAATAATGAAAAGGAAAATAGCTTAAGCCTTAGTAGATTGCGGATCCCCGGGTTAATTAA	ATACATAACTATTTCTTATGTTTATTTTCCTAAAATCCTTTATCCAACTAGAATTCGAGCTCGTTTAAAC	0		0		0
YDL199C	YDL199C	4	103000	105063	-	TTTAATACTACAGAGGAACCTGTTACTATCTCAGCTTTTTCAAGAAAATG	AACCCAGTTCAGGTGGAGGCCAGAATTCGCCTGGAGACATGGCAGTTGCC	CTAAACATTTATACTTAGGATGAAGCAAATATTTTTATGAGGCCATACTA	TTTAATACTACAGAGGAACCTGTTACTATCTCAGCTTTTTCAAGAAAATGCGGATCCCCGGGTTAATTAA	AACCCAGTTCAGGTGGAGGCCAGAATTCGCCTGGAGACATGGCAGTTGCCCGGATCCCCGGGTTAATTAA	CTAAACATTTATACTTAGGATGAAGCAAATATTTTTATGAGGCCATACTAGAATTCGAGCTCGTTTAAAC	0		0		0
YDL198C	GGC1,YHM1	4	105359	106261	-	GACATATATCAAACAAAGCATCTTCCAAAGTATTAGAAAAGGGAAATATG	TTGCGTTAGCTCAATCTTTGATACCTAGATTCGATAACCTGTTGAGCAAA	ATTCACAAGCTGAATGCCAAGGAAAATAGACAAGAAGTTCATGTACTTCA	GACATATATCAAACAAAGCATCTTCCAAAGTATTAGAAAAGGGAAATATGCGGATCCCCGGGTTAATTAA	TTGCGTTAGCTCAATCTTTGATACCTAGATTCGATAACCTGTTGAGCAAACGGATCCCCGGGTTAATTAA	ATTCACAAGCTGAATGCCAAGGAAAATAGACAAGAAGTTCATGTACTTCAGAATTCGAGCTCGTTTAAAC	0		0		0
YDL197C	ASF2	4	106627	108204	-	CTTCGATCAGTGGAGAAAGGAGGGAAAAAGGCCAAGACTGAGTGCTTATG	CTGTGGCACAAAGCTTGGCGGATTCAAAGCATTGTTCAGGACTACATAAA	GCAGATAGGCGGATGCCGTAGTGATCTCTACCGCTTCGTATTTATATTTA	CTTCGATCAGTGGAGAAAGGAGGGAAAAAGGCCAAGACTGAGTGCTTATGCGGATCCCCGGGTTAATTAA	CTGTGGCACAAAGCTTGGCGGATTCAAAGCATTGTTCAGGACTACATAAACGGATCCCCGGGTTAATTAA	GCAGATAGGCGGATGCCGTAGTGATCTCTACCGCTTCGTATTTATATTTAGAATTCGAGCTCGTTTAAAC	0		0		0
YDL196W	YDL196W	4	108451	108780	+	TACCTGCCTTGGTAGTTGGTTTCATAATTTACAATATACAAAGTTATATG	AACAAGTCGTGTCAGATCCATTCCTCTATTCCTGTAGTCGGGTTGCATTC	TTCTACACCTACAGTAGCGAAATAGTGCTGGTTCGTGACGTGTAAATTCA	TACCTGCCTTGGTAGTTGGTTTCATAATTTACAATATACAAAGTTATATGCGGATCCCCGGGTTAATTAA	AACAAGTCGTGTCAGATCCATTCCTCTATTCCTGTAGTCGGGTTGCATTCCGGATCCCCGGGTTAATTAA	TTCTACACCTACAGTAGCGAAATAGTGCTGGTTCGTGACGTGTAAATTCAGAATTCGAGCTCGTTTAAAC	0		0		0
YDL195W	SEC31,WEB1	4	108918	112739	+	CATATTTCCCTTTGTTCCCGTTTGCTCTCCCTAATTGAACAATAAAGATG	GGCTGACAGGAGTGAAGAGGTTGATTGGCATAGCTGAAGCGACTTTGAAT	AACAAGGCCAATACGCCACTTTTTGTACTGAAAGTTTTGAGACTGAATTA	CATATTTCCCTTTGTTCCCGTTTGCTCTCCCTAATTGAACAATAAAGATGCGGATCCCCGGGTTAATTAA	GGCTGACAGGAGTGAAGAGGTTGATTGGCATAGCTGAAGCGACTTTGAATCGGATCCCCGGGTTAATTAA	AACAAGGCCAATACGCCACTTTTTGTACTGAAAGTTTTGAGACTGAATTAGAATTCGAGCTCGTTTAAAC	0		0		0
YDL194W	SNF3	4	113290	115944	+	TAAACAGAAGGATATGCCTTTGTTGGCATAGAAAGAAGAATTTATAAATG	GCGAAGAAAACGCCACTAATCAACCTGTAAATGAAAATAATGATTTGAAA	TATAATGCACGTCCGCTTAATTAATACATCGAATAACATTAAATTAATTA	TAAACAGAAGGATATGCCTTTGTTGGCATAGAAAGAAGAATTTATAAATGCGGATCCCCGGGTTAATTAA	GCGAAGAAAACGCCACTAATCAACCTGTAAATGAAAATAATGATTTGAAACGGATCCCCGGGTTAATTAA	TATAATGCACGTCCGCTTAATTAATACATCGAATAACATTAAATTAATTAGAATTCGAGCTCGTTTAAAC	0		0		0
YDL193W	NUS1	4	116382	117509	+	TTTTGATACAATATATATACATATATTTTCCCCATTGTTTTTCTTAGATG	TCATCCGCGGCCTAAGACAGTACGCAGGATGTAAAGTGAATGTTGGTAAA	TTAAAAGGTTGAGCGAGATACTTATCTTTTCGTTTAGCTCTTAAGTATCA	TTTTGATACAATATATATACATATATTTTCCCCATTGTTTTTCTTAGATGCGGATCCCCGGGTTAATTAA	TCATCCGCGGCCTAAGACAGTACGCAGGATGTAAAGTGAATGTTGGTAAACGGATCCCCGGGTTAATTAA	TTAAAAGGTTGAGCGAGATACTTATCTTTTCGTTTAGCTCTTAAGTATCAGAATTCGAGCTCGTTTAAAC	0		0		0
YDL192W	ARF1	4	118031	118576	+	CATTGAAGGTATAAGAAAGAACTCAAACAGGTTTAATAGAATTAAAAATG	GTTTGTATGAAGGTTTGGAATGGTTAAGTAACAGTTTGAAAAACTCAACT	GTTTCATTTAGTTTATACAAGCGTATTTGATCCATATTCTAGAATTTTTA	CATTGAAGGTATAAGAAAGAACTCAAACAGGTTTAATAGAATTAAAAATGCGGATCCCCGGGTTAATTAA	GTTTGTATGAAGGTTTGGAATGGTTAAGTAACAGTTTGAAAAACTCAACTCGGATCCCCGGGTTAATTAA	GTTTCATTTAGTTTATACAAGCGTATTTGATCCATATTCTAGAATTTTTAGAATTCGAGCTCGTTTAAAC	0		0		0
YDL191W	RPL35A,SOS1	4	119374	120227	+	CACTATTATTGACCGTAGAATAGGTACAGTGAGACAGTATATTCGAAATG	AAAGAAAGAAGCAAATCGCTTTCCCACAAAGAAAGTACGCTATTAAGGCT	GAAAAGTTGGAACTATAGATAATGATAGTATATAATTGAACTTCCAATTA	CACTATTATTGACCGTAGAATAGGTACAGTGAGACAGTATATTCGAAATGCGGATCCCCGGGTTAATTAA	AAAGAAAGAAGCAAATCGCTTTCCCACAAAGAAAGTACGCTATTAAGGCTCGGATCCCCGGGTTAATTAA	GAAAAGTTGGAACTATAGATAATGATAGTATATAATTGAACTTCCAATTAGAATTCGAGCTCGTTTAAAC	0		0		0
YDL190C	UFD2	4	120417	123302	-	TAAGGGGAAAAGTTAACTTTGAAAGTAGAACCCTCATTCCATAGATCATG	TTTGTTTCAAAAAACAAAAAAAGGAAGAAGCAAAACATAAAGCAAGCGAG	TTATTTGATTAGGGTCAATTTTGCAATTTATTCTATCACTTATTCATTCA	TAAGGGGAAAAGTTAACTTTGAAAGTAGAACCCTCATTCCATAGATCATGCGGATCCCCGGGTTAATTAA	TTTGTTTCAAAAAACAAAAAAAGGAAGAAGCAAAACATAAAGCAAGCGAGCGGATCCCCGGGTTAATTAA	TTATTTGATTAGGGTCAATTTTGCAATTTATTCTATCACTTATTCATTCAGAATTCGAGCTCGTTTAAAC	0		0		0
YDL189W	RBS1	4	123926	125299	+	TATTCAAGTCTCTTCAAGTATATAAGGAGTTAGGGCAGAAGTAGGTGATG	CATCTAGGGATACTGATTCGGTAGAGATGAAATTTGATAAATTAAACATT	ATAAACCGTTACGTAATTTTTTCGCTATGTATAGTTCACTCCTCACGCTA	TATTCAAGTCTCTTCAAGTATATAAGGAGTTAGGGCAGAAGTAGGTGATGCGGATCCCCGGGTTAATTAA	CATCTAGGGATACTGATTCGGTAGAGATGAAATTTGATAAATTAAACATTCGGATCCCCGGGTTAATTAA	ATAAACCGTTACGTAATTTTTTCGCTATGTATAGTTCACTCCTCACGCTAGAATTCGAGCTCGTTTAAAC	0		0		0
YDL188C	PPH22,PPH2	4	125575	126708	-	TTTTATATTATTGGCACTTCTGTATAACTGGCTTTCATTCGAAAAAAATG	TGAGACCCGGTGAACCAACCGTCACCAGGAAGACACCGGATTATTTCTTA	GTTGGAATGAAATAGCGTAGTAAGGATAAAGGTGTAATAGATATATATTA	TTTTATATTATTGGCACTTCTGTATAACTGGCTTTCATTCGAAAAAAATGCGGATCCCCGGGTTAATTAA	TGAGACCCGGTGAACCAACCGTCACCAGGAAGACACCGGATTATTTCTTACGGATCCCCGGGTTAATTAA	GTTGGAATGAAATAGCGTAGTAAGGATAAAGGTGTAATAGATATATATTAGAATTCGAGCTCGTTTAAAC	0		0		0
YDL187C	YDL187C	4	127219	127548	-	ATATGGATGCGTGCCATTAATAGCTTCAATTGCGCCACGATGTGAAGATG	TCCACAAGTATATTCCATATAAAAGCACAGAACTACGAAGTGTCGCAAAT	TGTAATAATTTGGTGCGGTGTATGGGTTCAAGTTCCCAAAAAAACAACTA	ATATGGATGCGTGCCATTAATAGCTTCAATTGCGCCACGATGTGAAGATGCGGATCCCCGGGTTAATTAA	TCCACAAGTATATTCCATATAAAAGCACAGAACTACGAAGTGTCGCAAATCGGATCCCCGGGTTAATTAA	TGTAATAATTTGGTGCGGTGTATGGGTTCAAGTTCCCAAAAAAACAACTAGAATTCGAGCTCGTTTAAAC	1	YDL186W	1	YDL186W	0
YDL186W	YDL186W	4	127326	128159	+	CCTGGATGTAGATTTGCTTACAGATAGCCAAGAAATATTAGAAAAATATG	AATGCTGTACAGACTCCAATTGGGCGAGAATATTTTTTTGCCACCACGAT	TAGGAATAAAAAGAACAATAGATAGGACTATAGAAGCAAAGTGGAGTCTA	CCTGGATGTAGATTTGCTTACAGATAGCCAAGAAATATTAGAAAAATATGCGGATCCCCGGGTTAATTAA	AATGCTGTACAGACTCCAATTGGGCGAGAATATTTTTTTGCCACCACGATCGGATCCCCGGGTTAATTAA	TAGGAATAAAAAGAACAATAGATAGGACTATAGAAGCAAAGTGGAGTCTAGAATTCGAGCTCGTTTAAAC	1	YDL187C	1	YDL187C	0
YDL185C-A	YDL185C-A	4	128319	128546	-	AGAGACAGAATAGATGGCACCATATTCAGATTCAGCATGGTCTTCTAATG	ATCAAAATGTTGCAACCTTATCGAAAGAGCCATTTCTTGTTTTCAGCTTT	TTTTTCACATCTTTTTCCACGGCCGCTCAAAGGGGTCTCACACTGGATTA	AGAGACAGAATAGATGGCACCATATTCAGATTCAGCATGGTCTTCTAATGCGGATCCCCGGGTTAATTAA	ATCAAAATGTTGCAACCTTATCGAAAGAGCCATTTCTTGTTTTCAGCTTTCGGATCCCCGGGTTAATTAA	TTTTTCACATCTTTTTCCACGGCCGCTCAAAGGGGTCTCACACTGGATTAGAATTCGAGCTCGTTTAAAC	1	YDL185W	1	YDL185W	0
YDL185W	TFP1,VMA1,CLS8	4	128498	131713	+	TTCTTTCATTCTTAGAGTTAAAAAGCAAATAGAGAAGAAAAGAAACAATG	TCGAAAAATTGTTGAGCACTATGCAAGAAAGATTTGCTGAATCTACCGAT	GAAAAGACATCTAACAAATATACCAGAAGATAAATGCTACATATATCTTA	TTCTTTCATTCTTAGAGTTAAAAAGCAAATAGAGAAGAAAAGAAACAATGCGGATCCCCGGGTTAATTAA	TCGAAAAATTGTTGAGCACTATGCAAGAAAGATTTGCTGAATCTACCGATCGGATCCCCGGGTTAATTAA	GAAAAGACATCTAACAAATATACCAGAAGATAAATGCTACATATATCTTAGAATTCGAGCTCGTTTAAAC	1	YDL185C-A	1	YDL185C-A	0
YDL184C	RPL41A,RPL47A	4	132118	132195	-	CGTTCCATTTTGTACTAAAAGAACCAGACCACATCGATTCAATCGAAATG	GAACTAGAAGACTTAAGAGAAAGAGACGGAAGGTGAGAGCCAGATCCAAA	CTTGAAAGAATTTAAAACAAAATTAGAGTTATTTACTCATAATCCGCTTA	CGTTCCATTTTGTACTAAAAGAACCAGACCACATCGATTCAATCGAAATGCGGATCCCCGGGTTAATTAA	GAACTAGAAGACTTAAGAGAAAGAGACGGAAGGTGAGAGCCAGATCCAAACGGATCCCCGGGTTAATTAA	CTTGAAAGAATTTAAAACAAAATTAGAGTTATTTACTCATAATCCGCTTAGAATTCGAGCTCGTTTAAAC	0		0		0
YDL183C	YDL183C	4	132582	133544	-	ATTTTATCACAATACCAAAACTTCATCCGGTGTATTTTAGATTAAAGATG	TGAACAAAGTCATCCTTCAAGAATCGAAATCTCAAGAGAAAAACAAAATT	AGGAATACCTGTTATGTATATTTACATGAGATAGTGGACAATCTACATTA	ATTTTATCACAATACCAAAACTTCATCCGGTGTATTTTAGATTAAAGATGCGGATCCCCGGGTTAATTAA	TGAACAAAGTCATCCTTCAAGAATCGAAATCTCAAGAGAAAAACAAAATTCGGATCCCCGGGTTAATTAA	AGGAATACCTGTTATGTATATTTACATGAGATAGTGGACAATCTACATTAGAATTCGAGCTCGTTTAAAC	0		0		0
YDL182W	LYS20	4	135148	136434	+	TATCTACATAACAAACAAAGGAAGGACCCTGTATTGTTTTCCTAAAGATG	TACCGGAACTGGCCACCATCCCCGCCGCCAAGCGGACTAAGCCATCCGCC	TATCGTATGTAATAAGTGAAAGAACATAATGTAATGGTTTGGGAACGTTA	TATCTACATAACAAACAAAGGAAGGACCCTGTATTGTTTTCCTAAAGATGCGGATCCCCGGGTTAATTAA	TACCGGAACTGGCCACCATCCCCGCCGCCAAGCGGACTAAGCCATCCGCCCGGATCCCCGGGTTAATTAA	TATCGTATGTAATAAGTGAAAGAACATAATGTAATGGTTTGGGAACGTTAGAATTCGAGCTCGTTTAAAC	0		0		0
YDL181W	INH1	4	136890	137147	+	TTACACGCATTACTACAGCACACTTTTATACAGTTCCACAATAGAATATG	AACGAAAGAAGATTGATTCTTTGGAAAATAAAATTGACTCGATGACCAAA	GAATATTCTAAAAAAAAAAAAAAAAAAGCTTCTGCGGAAACGCATGATTA	TTACACGCATTACTACAGCACACTTTTATACAGTTCCACAATAGAATATGCGGATCCCCGGGTTAATTAA	AACGAAAGAAGATTGATTCTTTGGAAAATAAAATTGACTCGATGACCAAACGGATCCCCGGGTTAATTAA	GAATATTCTAAAAAAAAAAAAAAAAAAGCTTCTGCGGAAACGCATGATTAGAATTCGAGCTCGTTTAAAC	0		0		0
YDL180W	YDL180W	4	137607	139250	+	TCGTATTCTTTACACAAAAGAAAGATACCTGTGAAATATATCTGAATATG	CTTGGAGTCTTCTTGTTTTTGTAACGGGAATACTTTCAACAGTTTATATA	TTTCAAGATATGAACACCCTAATATGTGCACGGTCGTTACTTATATGCTA	TCGTATTCTTTACACAAAAGAAAGATACCTGTGAAATATATCTGAATATGCGGATCCCCGGGTTAATTAA	CTTGGAGTCTTCTTGTTTTTGTAACGGGAATACTTTCAACAGTTTATATACGGATCCCCGGGTTAATTAA	TTTCAAGATATGAACACCCTAATATGTGCACGGTCGTTACTTATATGCTAGAATTCGAGCTCGTTTAAAC	0		0		0
YDL179W	PCL9	4	140002	140916	+	TGTTTCGGTAACAGCATTATTAATTCTGAAGAAATACGCACAAAGAGATG	ACCAACGGTTAAATTTTACAAGGAGGGGCTGGTCATCGTTTTTCAAGCAA	ACGGAAAAGAATATTTATAGAGCTTGTAAAAGGCGAGTAACTTAGAATTA	TGTTTCGGTAACAGCATTATTAATTCTGAAGAAATACGCACAAAGAGATGCGGATCCCCGGGTTAATTAA	ACCAACGGTTAAATTTTACAAGGAGGGGCTGGTCATCGTTTTTCAAGCAACGGATCCCCGGGTTAATTAA	ACGGAAAAGAATATTTATAGAGCTTGTAAAAGGCGAGTAACTTAGAATTAGAATTCGAGCTCGTTTAAAC	0		0		0
YDL178W	DLD2,AIP2	4	141233	142825	+	TTTATTTTACAGACATTAATCCAGCACTACAAGTGGCATATAACAAGATG	TGAAGGTTCATTATGATCCTAATGGAATTTTAAACCCTTACAAATACATT	ATAAATATATACATATGTAGATAACTATAAAACTTGGCATTTTATTTTCA	TTTATTTTACAGACATTAATCCAGCACTACAAGTGGCATATAACAAGATGCGGATCCCCGGGTTAATTAA	TGAAGGTTCATTATGATCCTAATGGAATTTTAAACCCTTACAAATACATTCGGATCCCCGGGTTAATTAA	ATAAATATATACATATGTAGATAACTATAAAACTTGGCATTTTATTTTCAGAATTCGAGCTCGTTTAAAC	0		0		0
YDL177C	YDL177C	4	142920	143432	-	GATTCTTAGATAGGTATTGATGTTTGGTATTACTATTTTTTGGAGAAATG	ACATTTCAACATGTGCAGTGGAAACCTTAAAGAAGGGTGGATTTCTTCCT	CAATATTATATTCTACAATTGTGTATATTATATGGTAAGGGTGATATTTA	GATTCTTAGATAGGTATTGATGTTTGGTATTACTATTTTTTGGAGAAATGCGGATCCCCGGGTTAATTAA	ACATTTCAACATGTGCAGTGGAAACCTTAAAGAAGGGTGGATTTCTTCCTCGGATCCCCGGGTTAATTAA	CAATATTATATTCTACAATTGTGTATATTATATGGTAAGGGTGATATTTAGAATTCGAGCTCGTTTAAAC	0		0		0
YDL176W	YDL176W	4	143808	145934	+	TACACGCAGAAAGCGTCTTTCCACATAATCTGAACATTTTGTTATCGATG	ACGATGAAAAGGACCTTTATACATTCATTGTGAAAAAGGTAAAAAGAGAC	ACCTCATACGCTATTTTCTATTATGGCTAACATCTATGCAACTCAATTTA	TACACGCAGAAAGCGTCTTTCCACATAATCTGAACATTTTGTTATCGATGCGGATCCCCGGGTTAATTAA	ACGATGAAAAGGACCTTTATACATTCATTGTGAAAAAGGTAAAAAGAGACCGGATCCCCGGGTTAATTAA	ACCTCATACGCTATTTTCTATTATGGCTAACATCTATGCAACTCAATTTAGAATTCGAGCTCGTTTAAAC	0		0		0
YDL175C	AIR2	4	146195	147229	-	AACCTTACCTGTACAACGATAGCAGCTTACATCACTTCCTCGCAGTCATG	ACTACAATTCTTATCAACCATATAGGAGTGGTACCTTGGGGAAAAGAAGA	ATATAATGTAACCAAGAACAGCTTGTTAAAGGGCTTCCTATTTAAAGTTA	AACCTTACCTGTACAACGATAGCAGCTTACATCACTTCCTCGCAGTCATGCGGATCCCCGGGTTAATTAA	ACTACAATTCTTATCAACCATATAGGAGTGGTACCTTGGGGAAAAGAAGACGGATCCCCGGGTTAATTAA	ATATAATGTAACCAAGAACAGCTTGTTAAAGGGCTTCCTATTTAAAGTTAGAATTCGAGCTCGTTTAAAC	0		0		0
YDL174C	DLD1	4	147537	149300	-	AAATATTGTACATCATTCCGATCCAGCTGGAAACAAAAGCAAGAACAATG	CGGACAAAATCTTTAAAACTGATCCAAACGAGCCCGCTAATGATTACAGG	AATATATTTCAGGTTTACGTGAAGGGTGAAAAAGGAAAATCAGATACTCA	AAATATTGTACATCATTCCGATCCAGCTGGAAACAAAAGCAAGAACAATGCGGATCCCCGGGTTAATTAA	CGGACAAAATCTTTAAAACTGATCCAAACGAGCCCGCTAATGATTACAGGCGGATCCCCGGGTTAATTAA	AATATATTTCAGGTTTACGTGAAGGGTGAAAAAGGAAAATCAGATACTCAGAATTCGAGCTCGTTTAAAC	0		0		0
YDL173W	YDL173W	4	149902	150789	+	AAGCAGCAGCAGCGTTAGCAGCAGCAGTAGCGTAAGACCAAGTTAGTATG	AGAAGAAGAAGAAATCAGGGTTTTTCAGTTCTTTGAAAACTATGTTTAAT	ATTTATTTATTTTATTTAGTTTATTAATTTTGCTGATGAATGTTATTTCA	AAGCAGCAGCAGCGTTAGCAGCAGCAGTAGCGTAAGACCAAGTTAGTATGCGGATCCCCGGGTTAATTAA	AGAAGAAGAAGAAATCAGGGTTTTTCAGTTCTTTGAAAACTATGTTTAATCGGATCCCCGGGTTAATTAA	ATTTATTTATTTTATTTAGTTTATTAATTTTGCTGATGAATGTTATTTCAGAATTCGAGCTCGTTTAAAC	1	YDL172C	1	YDL172C	0
YDL172C	YDL172C	4	150318	150797	-	ATTTATTTATTTATTTATTTTATTTAGTTTATTAATTTTGCTGATGAATG	CGACAATTGGGGCGTTGTTGTTCGGAGACGAAGTGGTGGCATGCAAAGAC	AACCCGGTGACCAACACCAGGTCTCGTATCAGCGCTACAAGGAGCCATCA	ATTTATTTATTTATTTATTTTATTTAGTTTATTAATTTTGCTGATGAATGCGGATCCCCGGGTTAATTAA	CGACAATTGGGGCGTTGTTGTTCGGAGACGAAGTGGTGGCATGCAAAGACCGGATCCCCGGGTTAATTAA	AACCCGGTGACCAACACCAGGTCTCGTATCAGCGCTACAAGGAGCCATCAGAATTCGAGCTCGTTTAAAC	1	YDL173W	1	YDL173W	0
YDL171C	GLT1	4	150914	157351	-	CCATTTATTTATTTTGAAGAACTAGAAAAAGAATTAGAAAAGAAAGCATG	GTATCGTTCAACGTGATTACAAACTATTGAAAGAATTAGCTAGTCAAGTC	ATAAATAAATAATATACGATCATAAAATAAATAATAACTCAAGCTTTTTA	CCATTTATTTATTTTGAAGAACTAGAAAAAGAATTAGAAAAGAAAGCATGCGGATCCCCGGGTTAATTAA	GTATCGTTCAACGTGATTACAAACTATTGAAAGAATTAGCTAGTCAAGTCCGGATCCCCGGGTTAATTAA	ATAAATAAATAATATACGATCATAAAATAAATAATAACTCAAGCTTTTTAGAATTCGAGCTCGTTTAAAC	0		0		0
YDL170W	UGA3	4	158029	159615	+	TTGTTCATGTATGGATGCCAAGAAAACAAAGTTTTTTAAAGTGAGGTATG	ATGACCTGGTCCACATGATTGACGAATTAGATTACAATATTAATTTTGCC	CAATAATTTAAGACACCCAGGGGGCGGGGAAAGAAAATATATGCTGCTCA	TTGTTCATGTATGGATGCCAAGAAAACAAAGTTTTTTAAAGTGAGGTATGCGGATCCCCGGGTTAATTAA	ATGACCTGGTCCACATGATTGACGAATTAGATTACAATATTAATTTTGCCCGGATCCCCGGGTTAATTAA	CAATAATTTAAGACACCCAGGGGGCGGGGAAAGAAAATATATGCTGCTCAGAATTCGAGCTCGTTTAAAC	0		0		0
YDL169C	UGX2	4	159775	160446	-	TTAAATGCAGATAGTTATATCGTGTTCATAACCGCTACTGAAGAGTCATG	AGGTGGACTCGGACACCCCTGAAAATAATCACCTAAAATGGTTAATTAAA	TTATACCTATACAATGTAGAAATGCTAACGTTGAGACATAGAAGTAATTA	TTAAATGCAGATAGTTATATCGTGTTCATAACCGCTACTGAAGAGTCATGCGGATCCCCGGGTTAATTAA	AGGTGGACTCGGACACCCCTGAAAATAATCACCTAAAATGGTTAATTAAACGGATCCCCGGGTTAATTAA	TTATACCTATACAATGTAGAAATGCTAACGTTGAGACATAGAAGTAATTAGAATTCGAGCTCGTTTAAAC	0		0		0
YDL168W	SFA1,ADH5	4	161315	162475	+	TCTACAAAATCTCCAAGTAAAGAAGGAATATAAGTAATATAAGTACAATG	TGCATAACGGTGATTGCTTAAGAACCGTCTTGAAGTCTGATGAAATAAAA	TATTCCAGAAAATTTGAGTCATGCTTACTTAGTTTAATTAAGTACTCCTA	TCTACAAAATCTCCAAGTAAAGAAGGAATATAAGTAATATAAGTACAATGCGGATCCCCGGGTTAATTAA	TGCATAACGGTGATTGCTTAAGAACCGTCTTGAAGTCTGATGAAATAAAACGGATCCCCGGGTTAATTAA	TATTCCAGAAAATTTGAGTCATGCTTACTTAGTTTAATTAAGTACTCCTAGAATTCGAGCTCGTTTAAAC	0		0		0
YDL167C	NRP1	4	162706	164865	-	CGCTAGGATAATTGTGCATTGCTATTGTGATTTTTGATACAGAAATTATG	TTGGTGATAATAGCGCTTTCGGTAATGGTTTTAATAGTTCAATACGTTGG	AAATACAATGTGGTTGTGTGAAATTTATTGACCTCGCCTGTTCCTAACTA	CGCTAGGATAATTGTGCATTGCTATTGTGATTTTTGATACAGAAATTATGCGGATCCCCGGGTTAATTAA	TTGGTGATAATAGCGCTTTCGGTAATGGTTTTAATAGTTCAATACGTTGGCGGATCCCCGGGTTAATTAA	AAATACAATGTGGTTGTGTGAAATTTATTGACCTCGCCTGTTCCTAACTAGAATTCGAGCTCGTTTAAAC	0		0		0
YDL166C	FAP7	4	165160	165753	-	ATAGAAAGGAACTATTAGAAAATAAAGAAATACTTTGTTATATAGAGATG	ATGAATATCAAGGGCCTCGTAGCGATGACGAAGACGATGAAGACAGTGAG	TTACAATTATATATGTATATATGTAGATACACAAAGTTATGGAACGCCTA	ATAGAAAGGAACTATTAGAAAATAAAGAAATACTTTGTTATATAGAGATGCGGATCCCCGGGTTAATTAA	ATGAATATCAAGGGCCTCGTAGCGATGACGAAGACGATGAAGACAGTGAGCGGATCCCCGGGTTAATTAA	TTACAATTATATATGTATATATGTAGATACACAAAGTTATGGAACGCCTAGAATTCGAGCTCGTTTAAAC	0		0		0
YDL165W	CDC36,NOT2,DNA19	4	166001	166576	+	GGAAAAACAGGAAAAGAAGAGAATCAAAATATACTATTGCCTACATAATG	GGTGGGAAAAGTGCCAAAGAGATTTCTTATTGTTTTATAATGCTATTATG	ATCACATATAATGACATTTATTTACTTCTTTCGTTTCTCTGTCTACCTTA	GGAAAAACAGGAAAAGAAGAGAATCAAAATATACTATTGCCTACATAATGCGGATCCCCGGGTTAATTAA	GGTGGGAAAAGTGCCAAAGAGATTTCTTATTGTTTTATAATGCTATTATGCGGATCCCCGGGTTAATTAA	ATCACATATAATGACATTTATTTACTTCTTTCGTTTCTCTGTCTACCTTAGAATTCGAGCTCGTTTAAAC	0		0		0
YDL164C	CDC9,MMS8	4	166699	168966	-	ATTTTGAAGGTTTAGAGCAGCTTTTAACGTCATTGTTCATCAATTACATG	CTTCTGACCAGATCGTCGAATTGTATGAAAACCAATCCCACATGCAAAAT	CTCTTTTTTTTTTTTTAATGATTAATTGAGAAAAATAGTGTGCACATTTA	ATTTTGAAGGTTTAGAGCAGCTTTTAACGTCATTGTTCATCAATTACATGCGGATCCCCGGGTTAATTAA	CTTCTGACCAGATCGTCGAATTGTATGAAAACCAATCCCACATGCAAAATCGGATCCCCGGGTTAATTAA	CTCTTTTTTTTTTTTTAATGATTAATTGAGAAAAATAGTGTGCACATTTAGAATTCGAGCTCGTTTAAAC	1	YDL163W	1	YDL163W	0
YDL163W	YDL163W	4	168668	168970	+	CACCGGAAGAGGGAGCGGATGATGGTATAGAAGAAAAATTGCTACCCATG	TCAAGGGACGTGCAGATGAAAGAAGGCAACCGGTCAGTAATCTGCGCATG	AATGATTTTGAAGGTTTAGAGCAGCTTTTAACGTCATTGTTCATCAATTA	CACCGGAAGAGGGAGCGGATGATGGTATAGAAGAAAAATTGCTACCCATGCGGATCCCCGGGTTAATTAA	TCAAGGGACGTGCAGATGAAAGAAGGCAACCGGTCAGTAATCTGCGCATGCGGATCCCCGGGTTAATTAA	AATGATTTTGAAGGTTTAGAGCAGCTTTTAACGTCATTGTTCATCAATTAGAATTCGAGCTCGTTTAAAC	1	YDL164C	1	YDL164C	0
YDL162C	YDL162C	4	169071	169426	-	AGTACCCTTTCACCAAATTCTTCGCAGATCTAACAAATTGTTTCGACATG	TGGCTGATGGAATTTTTCACCTTAACGCGAAAACGCGTGAAAGTGAAATT	ATTTTTGAACAAAGTACAGCGAGATGCAAACGCATGGCTTATTGCAGCTA	AGTACCCTTTCACCAAATTCTTCGCAGATCTAACAAATTGTTTCGACATGCGGATCCCCGGGTTAATTAA	TGGCTGATGGAATTTTTCACCTTAACGCGAAAACGCGTGAAAGTGAAATTCGGATCCCCGGGTTAATTAA	ATTTTTGAACAAAGTACAGCGAGATGCAAACGCATGGCTTATTGCAGCTAGAATTCGAGCTCGTTTAAAC	1	YDL161W	1	YDL161W	0
YDL161W	ENT1	4	169425	170789	+	TATGAGTGCCAGGATCAGAAGGAAAGGGAGCAAGAGGCAGAACAATCATG	AGTCTCAAAATAATGGCTCAAATAACCGGGGATATACTCTAATTGATTTA	AAAATGCTCATCTGATTAGAAATGCGGACTGGAATGACAGAATCACTTCA	TATGAGTGCCAGGATCAGAAGGAAAGGGAGCAAGAGGCAGAACAATCATGCGGATCCCCGGGTTAATTAA	AGTCTCAAAATAATGGCTCAAATAACCGGGGATATACTCTAATTGATTTACGGATCCCCGGGTTAATTAA	AAAATGCTCATCTGATTAGAAATGCGGACTGGAATGACAGAATCACTTCAGAATTCGAGCTCGTTTAAAC	1	YDL162C	1	YDL162C	0
YDL160C-A	YDL160C-A	4	171077	171319	-	TATTGCACTTAGAAAGGACATGAGTACAGAGCACAGTAATTGTGGTGATG	TATCGCATCAAGATTTAGAGCGTATCGTAGGGCTTCTTCTGATGGATATG	AGGAATGTCTTATGTCTTTACATGGATGTAATGTAAGTTGAATACTTTTA	TATTGCACTTAGAAAGGACATGAGTACAGAGCACAGTAATTGTGGTGATGCGGATCCCCGGGTTAATTAA	TATCGCATCAAGATTTAGAGCGTATCGTAGGGCTTCTTCTGATGGATATGCGGATCCCCGGGTTAATTAA	AGGAATGTCTTATGTCTTTACATGGATGTAATGTAAGTTGAATACTTTTAGAATTCGAGCTCGTTTAAAC	0		0		0
YDL160C	DHH1	4	172098	173618	-	ATAACTTATCCCAGGCCTAAAATACGACAAGAAAGAAAATAGTAGTAATG	AGCAGGAGCATTTCATGGCGATGCCACCTGGTCAGTCACAACCCCAGTAT	AAAAAAAGCGTATCTCACCACAGTAGTTATTTTTTCTTAGATATTCTTTA	ATAACTTATCCCAGGCCTAAAATACGACAAGAAAGAAAATAGTAGTAATGCGGATCCCCGGGTTAATTAA	AGCAGGAGCATTTCATGGCGATGCCACCTGGTCAGTCACAACCCCAGTATCGGATCCCCGGGTTAATTAA	AAAAAAAGCGTATCTCACCACAGTAGTTATTTTTTCTTAGATATTCTTTAGAATTCGAGCTCGTTTAAAC	0		0		0
YDL159W-A	YDL159W-A	4	173870	174001	+	TAAAAGAATGTGGATGAAACAAAACTGAATCCAATGATGAGAAATAAATG	CTAAGATTGTGTTGTCCTTTTTCTTACGAAATTTTTTTCCCTCCCTTTTT	TATGATATCGCCGTTACCCCACGAATCACTTATAACGAGGACAGTGATCA	TAAAAGAATGTGGATGAAACAAAACTGAATCCAATGATGAGAAATAAATGCGGATCCCCGGGTTAATTAA	CTAAGATTGTGTTGTCCTTTTTCTTACGAAATTTTTTTCCCTCCCTTTTTCGGATCCCCGGGTTAATTAA	TATGATATCGCCGTTACCCCACGAATCACTTATAACGAGGACAGTGATCAGAATTCGAGCTCGTTTAAAC	0		0		0
YDL159W	STE7	4	174169	175716	+	CATCGGATCATATCTGTTTTTGCAGCGTGGTATATTGGTTGTTGGTCATG	CCTTGGACCGTGCCAAGTTAGAAAAGAAACAATCGGAAAGATCAACCCAT	TGTGAAAAAAAGTGCAATATGTTCCTAACTAATGTTATCGCATGCATTCA	CATCGGATCATATCTGTTTTTGCAGCGTGGTATATTGGTTGTTGGTCATGCGGATCCCCGGGTTAATTAA	CCTTGGACCGTGCCAAGTTAGAAAAGAAACAATCGGAAAGATCAACCCATCGGATCCCCGGGTTAATTAA	TGTGAAAAAAAGTGCAATATGTTCCTAACTAATGTTATCGCATGCATTCAGAATTCGAGCTCGTTTAAAC	2	YDL159C-B;YDL158C	2	YDL159C-B;YDL158C	0
YDL159C-B	YDL159C-B	4	174744	174920	-	TTTCATTATTTATATGCTGGTTATAATAAGCTCCATAGAAGGTGATAATG	GTAGTGCCTTCACCACAGTTCCAGAATTTCCAGCACCAATTTTCCCCAAC	TTGTCGGGAACTTCAAATGGTAATTATATACAACTCCAGGACTTGGTTCA	TTTCATTATTTATATGCTGGTTATAATAAGCTCCATAGAAGGTGATAATGCGGATCCCCGGGTTAATTAA	GTAGTGCCTTCACCACAGTTCCAGAATTTCCAGCACCAATTTTCCCCAACCGGATCCCCGGGTTAATTAA	TTGTCGGGAACTTCAAATGGTAATTATATACAACTCCAGGACTTGGTTCAGAATTCGAGCTCGTTTAAAC	1	YDL159W	1	YDL159W	0
YDL158C	YDL158C	4	175554	175862	-	AAGCTTCTCTCAATCGTGAAATTTTCTGTACATAAAGTGCTACTTTGATG	GTCTAAATTTATCATCTTTAGACGGTGATACGTATTTCATTATAAGATCA	TGTATTAAGAATGAAAGGGAAAGGTCATCGATTCATGAATTGCTACATCA	AAGCTTCTCTCAATCGTGAAATTTTCTGTACATAAAGTGCTACTTTGATGCGGATCCCCGGGTTAATTAA	GTCTAAATTTATCATCTTTAGACGGTGATACGTATTTCATTATAAGATCACGGATCCCCGGGTTAATTAA	TGTATTAAGAATGAAAGGGAAAGGTCATCGATTCATGAATTGCTACATCAGAATTCGAGCTCGTTTAAAC	1	YDL159W	1	YDL159W	0
YDL157C	YDL157C	4	175920	176276	-	AGGAAACAAAACACCGCTTAGAGAGAAACAGCAAGTGGTGAAAAACAATG	AATATAAGAACTCTAAGAAATTAAGTAACGATGGTGAAACACAGGCTAAC	CTTTATGTACAGAAAATTTCACGATTGAGAGAAGCTTGCGAATAATACTA	AGGAAACAAAACACCGCTTAGAGAGAAACAGCAAGTGGTGAAAAACAATGCGGATCCCCGGGTTAATTAA	AATATAAGAACTCTAAGAAATTAAGTAACGATGGTGAAACACAGGCTAACCGGATCCCCGGGTTAATTAA	CTTTATGTACAGAAAATTTCACGATTGAGAGAAGCTTGCGAATAATACTAGAATTCGAGCTCGTTTAAAC	0		0		0
YDL156W	YDL156W	4	176606	178174	+	ATCTATTTTAGTACGGTAATTAAAAGAAAGCTGCCTTTCAGTCAAGAATG	GCAAAATATTCCTCTTTACTGATGACTCCGGAACCATAAAGCAGGAAGAA	CTGAAAAGCGGGAGGGAAAAAAGGCAGTGCGGGTAACTGAGATGTTTTCA	ATCTATTTTAGTACGGTAATTAAAAGAAAGCTGCCTTTCAGTCAAGAATGCGGATCCCCGGGTTAATTAA	GCAAAATATTCCTCTTTACTGATGACTCCGGAACCATAAAGCAGGAAGAACGGATCCCCGGGTTAATTAA	CTGAAAAGCGGGAGGGAAAAAAGGCAGTGCGGGTAACTGAGATGTTTTCAGAATTCGAGCTCGTTTAAAC	0		0		0
YDL155W	CLB3	4	178461	179744	+	TTTAAAACATAGAGATATTTTGTCCTTTTTATCATTGCTTATTATAAATG	TCGTAGCGAAGTGGATAGCATTAGCTGAGCACAGAGTAGAAAGATCTAAC	ATGAATCCTTTTTCCTTTGTTGATGCCATGTCTCGAGCTGAGGCTATTTA	TTTAAAACATAGAGATATTTTGTCCTTTTTATCATTGCTTATTATAAATGCGGATCCCCGGGTTAATTAA	TCGTAGCGAAGTGGATAGCATTAGCTGAGCACAGAGTAGAAAGATCTAACCGGATCCCCGGGTTAATTAA	ATGAATCCTTTTTCCTTTGTTGATGCCATGTCTCGAGCTGAGGCTATTTAGAATTCGAGCTCGTTTAAAC	0		0		0
YDL154W	MSH5	4	180022	182727	+	CTCATTCAAAATAACTTACTCATTCATATACTGCCACCAAATGGAATATG	CTACAACAACTTCCGAGAATCTCAGGCTTAAATTGAAAAATTTCCTTCGC	TTAACTTAAATATGTTACAAGTAAGCGTTTTTTTATTCTTTGATATATTA	CTCATTCAAAATAACTTACTCATTCATATACTGCCACCAAATGGAATATGCGGATCCCCGGGTTAATTAA	CTACAACAACTTCCGAGAATCTCAGGCTTAAATTGAAAAATTTCCTTCGCCGGATCCCCGGGTTAATTAA	TTAACTTAAATATGTTACAAGTAAGCGTTTTTTTATTCTTTGATATATTAGAATTCGAGCTCGTTTAAAC	0		0		0
YDL153C	SAS10,UTP3	4	182874	184700	-	AGTTTTGGAGGAAGAGAAAACATATTAGAGTGGGTGTATAGAATAATATG	AAAAGACAGGTATCAAGAAGGGTTTGACGAGGTCTGTTAAATTCAAGAAT	AAATTTTGACACCACTACTTGGGTAAATACTACATATGTAAATTTTTTTA	AGTTTTGGAGGAAGAGAAAACATATTAGAGTGGGTGTATAGAATAATATGCGGATCCCCGGGTTAATTAA	AAAAGACAGGTATCAAGAAGGGTTTGACGAGGTCTGTTAAATTCAAGAATCGGATCCCCGGGTTAATTAA	AAATTTTGACACCACTACTTGGGTAAATACTACATATGTAAATTTTTTTAGAATTCGAGCTCGTTTAAAC	1	YDL152W	1	YDL152W	0
YDL152W	YDL152W	4	184504	184869	+	CTTCTTCCTCATCTTCTCTTTCATCTATTGACTCATCATCTTCATCCATG	CAGAAGCGCAGTTTGAAAATTTTTCATCCGCCCTGCAAAGTCCAATTTTT	ATTGTTCTCTTGAATACCATAATTCTCTGGTCATTATCTTCTGCTGATCA	CTTCTTCCTCATCTTCTCTTTCATCTATTGACTCATCATCTTCATCCATGCGGATCCCCGGGTTAATTAA	CAGAAGCGCAGTTTGAAAATTTTTCATCCGCCCTGCAAAGTCCAATTTTTCGGATCCCCGGGTTAATTAA	ATTGTTCTCTTGAATACCATAATTCTCTGGTCATTATCTTCTGCTGATCAGAATTCGAGCTCGTTTAAAC	1	YDL153C	1	YDL153C	0
YDL151C	BUD30	4	185000	185581	-	CAGGGAATAACTGTTCAATCCGTTTAGATCTCCACTCTTCGTCATCCATG	AGCGCCCATTTCCTTTATTACTGCTCATACTTAATGAATGCTATCCCGCT	ATAATTTGCTAGACTAACCGAAAGTCGAAGCGTAATCTTGTTTTTTATTA	CAGGGAATAACTGTTCAATCCGTTTAGATCTCCACTCTTCGTCATCCATGCGGATCCCCGGGTTAATTAA	AGCGCCCATTTCCTTTATTACTGCTCATACTTAATGAATGCTATCCCGCTCGGATCCCCGGGTTAATTAA	ATAATTTGCTAGACTAACCGAAAGTCGAAGCGTAATCTTGTTTTTTATTAGAATTCGAGCTCGTTTAAAC	1	YDL150W	1	YDL150W	0
YDL150W	RPC53,RPC4	4	185025	186293	+	CGAAGCGTAATCTTGTTTTTTATTAAGCGGGATAGCATTCATTAAGTATG	CGGAACTTCTAGGCCGTGTGGACGGTAAAATAGTAGTCACACCTCAAATC	TTATGACTGTGTATATTCATTTATATACTCGACAGATGCGAGTGCGATTA	CGAAGCGTAATCTTGTTTTTTATTAAGCGGGATAGCATTCATTAAGTATGCGGATCCCCGGGTTAATTAA	CGGAACTTCTAGGCCGTGTGGACGGTAAAATAGTAGTCACACCTCAAATCCGGATCCCCGGGTTAATTAA	TTATGACTGTGTATATTCATTTATATACTCGACAGATGCGAGTGCGATTAGAATTCGAGCTCGTTTAAAC	1	YDL151C	1	YDL151C	0
YDL149W	ATG9,APG9,CVT7,AUT9	4	186608	189601	+	ACATTTAAGAACAGCTTGAAATATCAAAATCACGGAATTATTAGGTTATG	GTGTCTTAGGACTTGTTAAAGAGTATTACAAGAAGTCTGACGTCGGAAGA	AGTTATATATATAGTTATATTGGATGATGTACACGACACAGTCTGCCTTA	ACATTTAAGAACAGCTTGAAATATCAAAATCACGGAATTATTAGGTTATGCGGATCCCCGGGTTAATTAA	GTGTCTTAGGACTTGTTAAAGAGTATTACAAGAAGTCTGACGTCGGAAGACGGATCCCCGGGTTAATTAA	AGTTATATATATAGTTATATTGGATGATGTACACGACACAGTCTGCCTTAGAATTCGAGCTCGTTTAAAC	0		0		0
YDL148C	NOP14,UTP2	4	189837	192269	-	CTGTAAATAGTACAGTTGAGAAGCAAATACAAGGGAAGATCAAATACATG	CGGAAAAAAACAAGTATGAAAGAGAAAGAAAACTACGTGGCGGAAAGAAA	GAGAAGCCTAATAAGAAAAAAAGAGGTTAATAAATTATTATTACTGGTTA	CTGTAAATAGTACAGTTGAGAAGCAAATACAAGGGAAGATCAAATACATGCGGATCCCCGGGTTAATTAA	CGGAAAAAAACAAGTATGAAAGAGAAAGAAAACTACGTGGCGGAAAGAAACGGATCCCCGGGTTAATTAA	GAGAAGCCTAATAAGAAAAAAAGAGGTTAATAAATTATTATTACTGGTTAGAATTCGAGCTCGTTTAAAC	0		0		0
YDL147W	RPN5,NAS5	4	192607	193944	+	TGCTGGGCTCAGTACCATTTTTGTTGCTAGAGTAAACGTAGAGAAAGATG	TAGGCCATTTAATTACAAAAGAGGAAATCATGCACGGTCTGCAAGCTAAA	AATCAAAACCGGATCTGAGATAATCCGACAGTTACTCGAAAATCTCTTCA	TGCTGGGCTCAGTACCATTTTTGTTGCTAGAGTAAACGTAGAGAAAGATGCGGATCCCCGGGTTAATTAA	TAGGCCATTTAATTACAAAAGAGGAAATCATGCACGGTCTGCAAGCTAAACGGATCCCCGGGTTAATTAA	AATCAAAACCGGATCTGAGATAATCCGACAGTTACTCGAAAATCTCTTCAGAATTCGAGCTCGTTTAAAC	0		0		0
YDL146W	LDB17	4	194432	195907	+	ACTTTAGCCTATACTTTCTTCGAACATTTTTCCTTTCATTTTGACTCATG	CGCCTCCGCCTCCTCCTCCTCCTCCATCAAGAAAATGTGGAACTCCAAAA	AAATGGTCGGAAGAACCACATTAATGCAAGAGGAAATAATGCTTTACTTA	ACTTTAGCCTATACTTTCTTCGAACATTTTTCCTTTCATTTTGACTCATGCGGATCCCCGGGTTAATTAA	CGCCTCCGCCTCCTCCTCCTCCTCCATCAAGAAAATGTGGAACTCCAAAACGGATCCCCGGGTTAATTAA	AAATGGTCGGAAGAACCACATTAATGCAAGAGGAAATAATGCTTTACTTAGAATTCGAGCTCGTTTAAAC	0		0		0
YDL145C	COP1,SOO1,RET1,SEC33	4	196254	199859	-	CTTTTTTTCTTCTGTAGTGTCTTTGTTCATTTCATTACTGGATCAAGATG	CTATGATTTCTAAGATCGGTGCACCTGCATCCGGATTAAGAATACGTGTA	GGTCGAGCAGAATACAATCCCGAGAAAATCAATAGGCAAAATAGCATTTA	CTTTTTTTCTTCTGTAGTGTCTTTGTTCATTTCATTACTGGATCAAGATGCGGATCCCCGGGTTAATTAA	CTATGATTTCTAAGATCGGTGCACCTGCATCCGGATTAAGAATACGTGTACGGATCCCCGGGTTAATTAA	GGTCGAGCAGAATACAATCCCGAGAAAATCAATAGGCAAAATAGCATTTAGAATTCGAGCTCGTTTAAAC	0		0		0
YDL144C	YDL144C	4	200344	201414	-	TACAGTCCCGGTGCCAGGATACAAGTTGGCATAAGCTAATGCCGAAAATG	GGAAAGGCCTATTGAAGTTCGACGAAAAAGCTGCCACTCTTGTGGACGAG	CAATATACTAGATGAAGGCTCGTCAACGAGGCAAGCAATGGTTGAAACTA	TACAGTCCCGGTGCCAGGATACAAGTTGGCATAAGCTAATGCCGAAAATGCGGATCCCCGGGTTAATTAA	GGAAAGGCCTATTGAAGTTCGACGAAAAAGCTGCCACTCTTGTGGACGAGCGGATCCCCGGGTTAATTAA	CAATATACTAGATGAAGGCTCGTCAACGAGGCAAGCAATGGTTGAAACTAGAATTCGAGCTCGTTTAAAC	0		0		0
YDL143W	CCT4,ANC2,TCP4	4	201678	203264	+	TGGAGGTGCGGCAAGTGTGCAAGACGGGTAAAGGAGAGTATAGAACGATG	CTGAATGTGTTAAATCCATCTTACGTATTGATGATATTGCATTCAGCCGT	ATATATATGTATATATGCATAAACATATGGATACTGGGAAACCCATGTTA	TGGAGGTGCGGCAAGTGTGCAAGACGGGTAAAGGAGAGTATAGAACGATGCGGATCCCCGGGTTAATTAA	CTGAATGTGTTAAATCCATCTTACGTATTGATGATATTGCATTCAGCCGTCGGATCCCCGGGTTAATTAA	ATATATATGTATATATGCATAAACATATGGATACTGGGAAACCCATGTTAGAATTCGAGCTCGTTTAAAC	0		0		0
YDL142C	CRD1,CLS1	4	203402	204253	-	AAACAAGCAGGCCTGGTAGCATAGTTTGGTCCCTAATAATTTAGTCAATG	TGAGCGGAGTATCCTACGCATTAAAGAGAAACGCTTTTAAACTTTTAAAA	TTCAAAATGAAAAGTCAGGACCCTTTTCAAAAAGGATCGCAATTATACTA	AAACAAGCAGGCCTGGTAGCATAGTTTGGTCCCTAATAATTTAGTCAATGCGGATCCCCGGGTTAATTAA	TGAGCGGAGTATCCTACGCATTAAAGAGAAACGCTTTTAAACTTTTAAAACGGATCCCCGGGTTAATTAA	TTCAAAATGAAAAGTCAGGACCCTTTTCAAAAAGGATCGCAATTATACTAGAATTCGAGCTCGTTTAAAC	0		0		0
YDL141W	BPL1,ACC2	4	204722	206794	+	AGAAGATATTAGAACGATCTTATCAATATTATCCAATTTCAACTAATATG	GTAACACTTTTGATATCTTCAAGAGCTTAATTGCTAAAAAGGTTCAGAGT	CATTTAAATTACGTCCGTCCAACTTCTAAGCTTCAAGTGGTAGACTCTTA	AGAAGATATTAGAACGATCTTATCAATATTATCCAATTTCAACTAATATGCGGATCCCCGGGTTAATTAA	GTAACACTTTTGATATCTTCAAGAGCTTAATTGCTAAAAAGGTTCAGAGTCGGATCCCCGGGTTAATTAA	CATTTAAATTACGTCCGTCCAACTTCTAAGCTTCAAGTGGTAGACTCTTAGAATTCGAGCTCGTTTAAAC	0		0		0
YDL140C	RPO21,SUA8,RPB220,RPB1	4	207043	212244	-	AATCATAAAGATAGCAATAACACTTTACCCCAAAATATAAATCAGACATG	ATTCTCCAAAGCAAGACGAACAAAAGCATAATGAAAATGAAAATTCCAGA	CTATATATAATGTAATAACGTCAAATACGTAAGGATGATATACTATATCA	AATCATAAAGATAGCAATAACACTTTACCCCAAAATATAAATCAGACATGCGGATCCCCGGGTTAATTAA	ATTCTCCAAAGCAAGACGAACAAAAGCATAATGAAAATGAAAATTCCAGACGGATCCCCGGGTTAATTAA	CTATATATAATGTAATAACGTCAAATACGTAAGGATGATATACTATATCAGAATTCGAGCTCGTTTAAAC	0		0		0
YDL139C	SCM3	4	213058	213729	-	AAGTGGGATACAGCATATCGACGCCTCCACTACAAATTAACAGAAGGATG	CAGATTTCAAGAAGTACGAGGCCAAACTCTCGAAAAGGATATTACGAGAT	ATATATTCTGATGGTAATGAAATTCGAATATACGGCATTTTAGCACCTTA	AAGTGGGATACAGCATATCGACGCCTCCACTACAAATTAACAGAAGGATGCGGATCCCCGGGTTAATTAA	CAGATTTCAAGAAGTACGAGGCCAAACTCTCGAAAAGGATATTACGAGATCGGATCCCCGGGTTAATTAA	ATATATTCTGATGGTAATGAAATTCGAATATACGGCATTTTAGCACCTTAGAATTCGAGCTCGTTTAAAC	0		0		0
YDL138W	RGT2	4	215034	217325	+	CACAGAAACCACTATATATATATGGAAATATCTCGAATATTGCTTGTATG	ATTGGACGAGTGACCTCGCTAGTAAGCACAGCCAATACACTTCCCCCCAA	TAAAACGGTTTATAAGACCTCGAACGATCGTAAGATGCTATTGGTTTTTA	CACAGAAACCACTATATATATATGGAAATATCTCGAATATTGCTTGTATGCGGATCCCCGGGTTAATTAA	ATTGGACGAGTGACCTCGCTAGTAAGCACAGCCAATACACTTCCCCCCAACGGATCCCCGGGTTAATTAA	TAAAACGGTTTATAAGACCTCGAACGATCGTAAGATGCTATTGGTTTTTAGAATTCGAGCTCGTTTAAAC	0		0		0
YDL137W	ARF2	4	218212	218757	+	ACCAATAGAGATAAAAAAAAAAGGAATTAAGATTTCATAGAGAAAAGATG	GTCTGTACGAAGGTCTGGAGTGGTTAAGCAACAACTTGAAGAATCAATCC	CAAAACACACAAAGTCCGCATGACTAAACGTTCTATACAGATTTAGATTA	ACCAATAGAGATAAAAAAAAAAGGAATTAAGATTTCATAGAGAAAAGATGCGGATCCCCGGGTTAATTAA	GTCTGTACGAAGGTCTGGAGTGGTTAAGCAACAACTTGAAGAATCAATCCCGGATCCCCGGGTTAATTAA	CAAAACACACAAAGTCCGCATGACTAAACGTTCTATACAGATTTAGATTAGAATTCGAGCTCGTTTAAAC	0		0		0
YDL136W	RPL35B,SOS2	4	219283	220050	+	TTTGATAGTACAGTGAGAACACGATAAAGAACCAAATAGGACTAAAAATG	AAAGAAAGAAGCAAATCGCTTTCCCACAAAGAAAGTACGCTATCAAGGCT	TTAAACTATATCCAAAAATCAAATATTAAAATGATAATCTAACGAAATTA	TTTGATAGTACAGTGAGAACACGATAAAGAACCAAATAGGACTAAAAATGCGGATCCCCGGGTTAATTAA	AAAGAAAGAAGCAAATCGCTTTCCCACAAAGAAAGTACGCTATCAAGGCTCGGATCCCCGGGTTAATTAA	TTAAACTATATCCAAAAATCAAATATTAAAATGATAATCTAACGAAATTAGAATTCGAGCTCGTTTAAAC	0		0		0
YDL135C	RDI1	4	220363	220971	-	ACGAATAACTCGAGTATTGAGCTTTTTTATTAGAGAAAAACTGAATAATG	ATAAAACTAACCACTTGACTTTAAATTGGGGGGTCGAAATTGTCAAAAAA	CTCTTGTTTATACAGGCCATATCTACATTGTGCATTTCAAGAACTTATTA	ACGAATAACTCGAGTATTGAGCTTTTTTATTAGAGAAAAACTGAATAATGCGGATCCCCGGGTTAATTAA	ATAAAACTAACCACTTGACTTTAAATTGGGGGGTCGAAATTGTCAAAAAACGGATCCCCGGGTTAATTAA	CTCTTGTTTATACAGGCCATATCTACATTGTGCATTTCAAGAACTTATTAGAATTCGAGCTCGTTTAAAC	0		0		0
YDL134C	PPH21,PPH1	4	221345	222454	-	GAAAGAGGGATATAAATTATCGCATAAAACAATAAACAAAAAGAAAAATG	TAAGACCAGGTGAACCTAGCGTCAGCAGAAAGACGCCAGATTACTTTTTA	GAGAAAAGTGAATATATATCTATATAGATGCATATATGTATACATACTCA	GAAAGAGGGATATAAATTATCGCATAAAACAATAAACAAAAAGAAAAATGCGGATCCCCGGGTTAATTAA	TAAGACCAGGTGAACCTAGCGTCAGCAGAAAGACGCCAGATTACTTTTTACGGATCCCCGGGTTAATTAA	GAGAAAAGTGAATATATATCTATATAGATGCATATATGTATACATACTCAGAATTCGAGCTCGTTTAAAC	0		0		0
YDL133C-A	RPL41B,YDL134C-A,RPL47B	4	223407	223484	-	TTATATTTTACTTCAATCCTAAGATAGTCATATCGACTTAATTCCAAATG	GAACTAGAAGACTTAAGAGAAAGAGACGGAAGGTGAGAGCCAGATCCAAA	AATCAATTTTTACTTGACCTGAACTTAACGATTTGCTCTCAATCCGCTTA	TTATATTTTACTTCAATCCTAAGATAGTCATATCGACTTAATTCCAAATGCGGATCCCCGGGTTAATTAA	GAACTAGAAGACTTAAGAGAAAGAGACGGAAGGTGAGAGCCAGATCCAAACGGATCCCCGGGTTAATTAA	AATCAATTTTTACTTGACCTGAACTTAACGATTTGCTCTCAATCCGCTTAGAATTCGAGCTCGTTTAAAC	0		0		0
YDL133W	YDL133W	4	224110	225423	+	TTTTTGCATTTTTTGAGGCGTTCTTTTTTTTTACACTGACAAATTTAATG	TCAGTATTGTTAGAGTAGTCGAAAAAGTCAGTTCAATTACCAACAGAAAC	AATCTTGGTATCTAAAAGAATTCTTTTAATTTCTATATTTGTCGAGCTCA	TTTTTGCATTTTTTGAGGCGTTCTTTTTTTTTACACTGACAAATTTAATGCGGATCCCCGGGTTAATTAA	TCAGTATTGTTAGAGTAGTCGAAAAAGTCAGTTCAATTACCAACAGAAACCGGATCCCCGGGTTAATTAA	AATCTTGGTATCTAAAAGAATTCTTTTAATTTCTATATTTGTCGAGCTCAGAATTCGAGCTCGTTTAAAC	0		0		0
YDL132W	CDC53	4	225987	228434	+	ACATATACCTAAACAAAGAATAACAACAAAATCGCAAGCAGCAAAGCATG	AGGGATACCTACAGAGGGGAGACGATGGTGAATCGTATGCTTACCTTGCT	ACTCGTAGGATTTGCTTCGTTCGATCAGCACAAGCCTTCAAAGATGATTA	ACATATACCTAAACAAAGAATAACAACAAAATCGCAAGCAGCAAAGCATGCGGATCCCCGGGTTAATTAA	AGGGATACCTACAGAGGGGAGACGATGGTGAATCGTATGCTTACCTTGCTCGGATCCCCGGGTTAATTAA	ACTCGTAGGATTTGCTTCGTTCGATCAGCACAAGCCTTCAAAGATGATTAGAATTCGAGCTCGTTTAAAC	0		0		0
YDL131W	LYS21	4	229076	230398	+	TTTAAAAGTGCAACGACAACCCAAGTAATTGTATACTTTAACAAACCATG	ATATCGATATTTCCAATGGGCATGTTTCTAAAAAGGCAAAGGTCACCAAA	CCCAGTATGTGTATGTTTGAAATATGTGTACTATATATATAATGAAACTA	TTTAAAAGTGCAACGACAACCCAAGTAATTGTATACTTTAACAAACCATGCGGATCCCCGGGTTAATTAA	ATATCGATATTTCCAATGGGCATGTTTCTAAAAAGGCAAAGGTCACCAAACGGATCCCCGGGTTAATTAA	CCCAGTATGTGTATGTTTGAAATATGTGTACTATATATATAATGAAACTAGAATTCGAGCTCGTTTAAAC	0		0		0
YDL130W-A	STF1,AIS2	4	230854	231114	+	ATTAAGAAGCACTTTCACCCAGTCATCCAACCAAACACGCTATCAATATG	ACAAGAAAAAATTAGAGAATTTAGAAAACAAAATTAATAACCTTTCAAAG	TACGTACAAAACGTGTCTGCAGAACCTTTAGCCTTAACAATGACCAATCA	ATTAAGAAGCACTTTCACCCAGTCATCCAACCAAACACGCTATCAATATGCGGATCCCCGGGTTAATTAA	ACAAGAAAAAATTAGAGAATTTAGAAAACAAAATTAATAACCTTTCAAAGCGGATCCCCGGGTTAATTAA	TACGTACAAAACGTGTCTGCAGAACCTTTAGCCTTAACAATGACCAATCAGAATTCGAGCTCGTTTAAAC	0		0		0
YDL130W	RPP1B,RPLA3,RPL44'	4	231589	232210	+	TTCAGTTAATCTTGGACTAACAAAGAAATCAAACAACTAAGAAGAAAATG	AAGAAGCTGCTGAAGAATCTGACGACGACATGGGTTTCGGTTTATTCGAC	ATAAAGGGTAAAAAAACGTTGCAGAAAAAATGACTTTCCTTGTATGTTTA	TTCAGTTAATCTTGGACTAACAAAGAAATCAAACAACTAAGAAGAAAATGCGGATCCCCGGGTTAATTAA	AAGAAGCTGCTGAAGAATCTGACGACGACATGGGTTTCGGTTTATTCGACCGGATCCCCGGGTTAATTAA	ATAAAGGGTAAAAAAACGTTGCAGAAAAAATGACTTTCCTTGTATGTTTAGAATTCGAGCTCGTTTAAAC	0		0		0
YDL129W	YDL129W	4	232707	233582	+	AACGCGGGCAAGGCTACGGCATACAGGAATTTAACATTTTGTTGGCTATG	ATGTGAGAGTTTTTCATTTGGAGAAAAAAGAACCTAAATCACGAAAAAAA	TGAGAAAGAAAAATTATTGACGTTCAATAATATTTTTTTCTAGCATACTA	AACGCGGGCAAGGCTACGGCATACAGGAATTTAACATTTTGTTGGCTATGCGGATCCCCGGGTTAATTAA	ATGTGAGAGTTTTTCATTTGGAGAAAAAAGAACCTAAATCACGAAAAAAACGGATCCCCGGGTTAATTAA	TGAGAAAGAAAAATTATTGACGTTCAATAATATTTTTTTCTAGCATACTAGAATTCGAGCTCGTTTAAAC	0		0		0
YDL128W	VCX1,MNR1,HUM1	4	234335	235570	+	CATATCATTCATCGGCTGCTGATAGCAAATAAAACAACATAGATACAATG	TTTTCTATTATCCAGACGAAAAAACCCTTGACTCTATTGGAAATAGTTTA	AATATAAAAAAAAAGAGAATGGTGAATTTCTGCGCTACTGTTCTTACTCA	CATATCATTCATCGGCTGCTGATAGCAAATAAAACAACATAGATACAATGCGGATCCCCGGGTTAATTAA	TTTTCTATTATCCAGACGAAAAAACCCTTGACTCTATTGGAAATAGTTTACGGATCCCCGGGTTAATTAA	AATATAAAAAAAAAGAGAATGGTGAATTTCTGCGCTACTGTTCTTACTCAGAATTCGAGCTCGTTTAAAC	0		0		0
YDL127W	PCL2,CLN4	4	236610	237536	+	TCCGACAAGAGCAATTTCAATACGGCAGCAACTTTTTACTACAAAAGATG	AAGAAGATACAAAAGTAAAGAAATCGAATTGGTCAAATTACTTCAAATCG	AAGTGCCATGAAGAAACGCAGGCCAGGCATAATTTCGACATTTAAAATCA	TCCGACAAGAGCAATTTCAATACGGCAGCAACTTTTTACTACAAAAGATGCGGATCCCCGGGTTAATTAA	AAGAAGATACAAAAGTAAAGAAATCGAATTGGTCAAATTACTTCAAATCGCGGATCCCCGGGTTAATTAA	AAGTGCCATGAAGAAACGCAGGCCAGGCATAATTTCGACATTTAAAATCAGAATTCGAGCTCGTTTAAAC	0		0		0
YDL126C	CDC48	4	237840	240347	-	GCCATTGACTCGATAACTGGCTCAACTACAAGACAGATATACAAATCATG	CAGGTGCTGCATTTGGTTCTAATGCGGAGGAAGATGATGATTTGTATAGT	AATGACTTGAATTTACGATTTAAAATAAAAATATACCTGGCATATAACTA	GCCATTGACTCGATAACTGGCTCAACTACAAGACAGATATACAAATCATGCGGATCCCCGGGTTAATTAA	CAGGTGCTGCATTTGGTTCTAATGCGGAGGAAGATGATGATTTGTATAGTCGGATCCCCGGGTTAATTAA	AATGACTTGAATTTACGATTTAAAATAAAAATATACCTGGCATATAACTAGAATTCGAGCTCGTTTAAAC	0		0		0
YDL125C	HNT1	4	240702	241289	-	AAGTAAAAGGACAATCAGCACGCCTTCCAGACTTTTAAGAAACATTGATG	AGTTGGGCAAGCTACACAAGGAATTGCTTGCCAAACTAGAAGGCTCCGAT	TTAAATATGAAAAGAAAACGCTAAAAGAAATCATAGCATGCATTACTCTA	AAGTAAAAGGACAATCAGCACGCCTTCCAGACTTTTAAGAAACATTGATGCGGATCCCCGGGTTAATTAA	AGTTGGGCAAGCTACACAAGGAATTGCTTGCCAAACTAGAAGGCTCCGATCGGATCCCCGGGTTAATTAA	TTAAATATGAAAAGAAAACGCTAAAAGAAATCATAGCATGCATTACTCTAGAATTCGAGCTCGTTTAAAC	0		0		0
YDL124W	YDL124W	4	241942	242880	+	TTGTGTTACCCTAAAGAAACGGAGGTCAGTTAACAACACTTTTACAGATG	TGTATTGGAATAAATTGTACGGTAAATACAACTACGCTGCTCAAAAAGTA	TAAAGTTATACAAAACAAATATGACTCGTACATAAATTATCCGGTATTTA	TTGTGTTACCCTAAAGAAACGGAGGTCAGTTAACAACACTTTTACAGATGCGGATCCCCGGGTTAATTAA	TGTATTGGAATAAATTGTACGGTAAATACAACTACGCTGCTCAAAAAGTACGGATCCCCGGGTTAATTAA	TAAAGTTATACAAAACAAATATGACTCGTACATAAATTATCCGGTATTTAGAATTCGAGCTCGTTTAAAC	0		0		0
YDL123W	SNA4	4	243101	243523	+	CCCAATAAAGGTGCCACACTGAGCAGAGACAGATAGGGACGCGCATCATG	CCCATGACAACAAACAGTCTCTGGTTGAGTCTCCTCCTCCTTATGTGCCA	TCGCTTGCTTGCTTGCTGGAATTTTCATTTTCCTTGCTGTAGCTTCATCA	CCCAATAAAGGTGCCACACTGAGCAGAGACAGATAGGGACGCGCATCATGCGGATCCCCGGGTTAATTAA	CCCATGACAACAAACAGTCTCTGGTTGAGTCTCCTCCTCCTTATGTGCCACGGATCCCCGGGTTAATTAA	TCGCTTGCTTGCTTGCTGGAATTTTCATTTTCCTTGCTGTAGCTTCATCAGAATTCGAGCTCGTTTAAAC	0		0		0
YDL122W	UBP1	4	244235	246664	+	CTAGATACTTTCGAACACTTCTCCCCTTTTAATCTACAAAATTTTGTATG	AGTTCGAGAGAACAGAAGACCATAGAGATATTTCTGGTAAAGATGTAAAC	ATTATAGTTATTGTTATTTACACAATTACGGATATCGTATTTATAACTTA	CTAGATACTTTCGAACACTTCTCCCCTTTTAATCTACAAAATTTTGTATGCGGATCCCCGGGTTAATTAA	AGTTCGAGAGAACAGAAGACCATAGAGATATTTCTGGTAAAGATGTAAACCGGATCCCCGGGTTAATTAA	ATTATAGTTATTGTTATTTACACAATTACGGATATCGTATTTATAACTTAGAATTCGAGCTCGTTTAAAC	0		0		0
YDL121C	YDL121C	4	246816	247265	-	ACGAATTCCCTTAAAGTTCTCGGTGCCTAAGTCAATAAGTCCGGAGCATG	AGTTGAAGAAGTACAATGGTAAGAAAAATGAAGCTTACGAAGGATTTGTA	GAATGTCTAAAGTTTTTGTAGGACAATTGCAAAAATCACTTCCATTATTA	ACGAATTCCCTTAAAGTTCTCGGTGCCTAAGTCAATAAGTCCGGAGCATGCGGATCCCCGGGTTAATTAA	AGTTGAAGAAGTACAATGGTAAGAAAAATGAAGCTTACGAAGGATTTGTACGGATCCCCGGGTTAATTAA	GAATGTCTAAAGTTTTTGTAGGACAATTGCAAAAATCACTTCCATTATTAGAATTCGAGCTCGTTTAAAC	0		0		0
YDL120W	YFH1	4	247606	248130	+	AAAGATAGTATTTCAAAAAAAACTAAGCGAGAAGATAGAGTGTAGCAATG	TAACAGATATACTTACTGAAGAAGTTGAGAAGGCCATTTCTAAAAGCCAA	GTTACAAGTGTTTAAATAAATATAAGAGAGTCGATGGATAAGTGCACTTA	AAAGATAGTATTTCAAAAAAAACTAAGCGAGAAGATAGAGTGTAGCAATGCGGATCCCCGGGTTAATTAA	TAACAGATATACTTACTGAAGAAGTTGAGAAGGCCATTTCTAAAAGCCAACGGATCCCCGGGTTAATTAA	GTTACAAGTGTTTAAATAAATATAAGAGAGTCGATGGATAAGTGCACTTAGAATTCGAGCTCGTTTAAAC	0		0		0
YDL119C	YDL119C	4	248372	249295	-	GCACAGCGGGAACAACTAGAAGGTACACAATTTGTGAAGCAGCATACATG	GTGCAGGTATTGCGTGGGGTATATATGAGGAGTTGGTCAAAAGATTCATG	ACCTTTTTTGAAGAATGCGAGATTGCAATGAAATATGTGTCTATTTTTTA	GCACAGCGGGAACAACTAGAAGGTACACAATTTGTGAAGCAGCATACATGCGGATCCCCGGGTTAATTAA	GTGCAGGTATTGCGTGGGGTATATATGAGGAGTTGGTCAAAAGATTCATGCGGATCCCCGGGTTAATTAA	ACCTTTTTTGAAGAATGCGAGATTGCAATGAAATATGTGTCTATTTTTTAGAATTCGAGCTCGTTTAAAC	1	YDL118W	1	YDL118W	0
YDL118W	YDL118W	4	248985	249365	+	TTTCATACATCGTTAATCGTGGTAAGCTACTGCTCTTGTTATATACAATG	TTGTGTACCTTCTAGTTGTTCCCGCTGTGCTATTTGCTTTTCTTTTGGTA	TCCACATTAAATTCTCACGAGGGGGTGATTGAAGTAAAAGGATAAGCTTA	TTTCATACATCGTTAATCGTGGTAAGCTACTGCTCTTGTTATATACAATGCGGATCCCCGGGTTAATTAA	TTGTGTACCTTCTAGTTGTTCCCGCTGTGCTATTTGCTTTTCTTTTGGTACGGATCCCCGGGTTAATTAA	TCCACATTAAATTCTCACGAGGGGGTGATTGAAGTAAAAGGATAAGCTTAGAATTCGAGCTCGTTTAAAC	1	YDL119C	1	YDL119C	0
YDL117W	CYK3	4	250264	252921	+	ATAACATTTAATTCCTGAATTTACCGTATTACATTTAAATTTGCATAATG	TCGCTGACTCTGGTATTGGGTGGTCCGTTTTTGCTGAATGGTTGTGCGTA	TTGAATGATACAGATTATAGCGCTGTAAAAAAATTTGTGAAAAACGTTTA	ATAACATTTAATTCCTGAATTTACCGTATTACATTTAAATTTGCATAATGCGGATCCCCGGGTTAATTAA	TCGCTGACTCTGGTATTGGGTGGTCCGTTTTTGCTGAATGGTTGTGCGTACGGATCCCCGGGTTAATTAA	TTGAATGATACAGATTATAGCGCTGTAAAAAAATTTGTGAAAAACGTTTAGAATTCGAGCTCGTTTAAAC	0		0		0
YDL116W	NUP84	4	253249	255429	+	AAAACCAATTGAGTGCTACTTCGAAGTAAAATACATAGCCATTTCAAATG	AGTTAAAAGAGTATCTGGATCTCGTTGCTCGCACAGCAACCCTTTCGAAC	TTGCTGTTTACTTAAAATATAAACTTATTCTGCAATACATTAATTGATCA	AAAACCAATTGAGTGCTACTTCGAAGTAAAATACATAGCCATTTCAAATGCGGATCCCCGGGTTAATTAA	AGTTAAAAGAGTATCTGGATCTCGTTGCTCGCACAGCAACCCTTTCGAACCGGATCCCCGGGTTAATTAA	TTGCTGTTTACTTAAAATATAAACTTATTCTGCAATACATTAATTGATCAGAATTCGAGCTCGTTTAAAC	0		0		0
YDL115C	IWR1	4	255678	256809	-	TCTCTGAGGTATAGCTTTTGTTGAGGTAGGCATACAAGATTTCGGGAATG	ATCATAGGGACAGAATTTTTCATCAGCTACAGAAAAAAATTAATAGAAGC	TACAGATGCAGTTACTTACATACATTGAACAGTTTCTGACGGCAAATTTA	TCTCTGAGGTATAGCTTTTGTTGAGGTAGGCATACAAGATTTCGGGAATGCGGATCCCCGGGTTAATTAA	ATCATAGGGACAGAATTTTTCATCAGCTACAGAAAAAAATTAATAGAAGCCGGATCCCCGGGTTAATTAA	TACAGATGCAGTTACTTACATACATTGAACAGTTTCTGACGGCAAATTTAGAATTCGAGCTCGTTTAAAC	1	YDL114W-A	1	YDL114W-A	0
YDL114W-A	YDL114W-A	4	256618	256731	+	GCTCGGATTGATAGCTTTCAGAGCTCACAGTCTTTGATAATTTAAATATG	TAGTTAGTCAAACGCATTTTTGTTATATCGGTAGAATAACAACACATACA	AGTTTATCAGAGTAAAGAGAAGAAGGGATGAGGATTCTGTGCAGGCATTA	GCTCGGATTGATAGCTTTCAGAGCTCACAGTCTTTGATAATTTAAATATGCGGATCCCCGGGTTAATTAA	TAGTTAGTCAAACGCATTTTTGTTATATCGGTAGAATAACAACACATACACGGATCCCCGGGTTAATTAA	AGTTTATCAGAGTAAAGAGAAGAAGGGATGAGGATTCTGTGCAGGCATTAGAATTCGAGCTCGTTTAAAC	1	YDL115C	1	YDL115C	0
YDL114W	YDL114W	4	257287	258213	+	CAGTGACATATTTAACATAGTTTTATGGGTAAGAAATATTATTAATTATG	ACCATGTAACGTCAACCAGCCCGCGAGCAATAAATCCGAAGAGAAGTGCA	CAACGTGAAGATCAAATAACGTCAAATGTATTAAATAGACTAAAATATTA	CAGTGACATATTTAACATAGTTTTATGGGTAAGAAATATTATTAATTATGCGGATCCCCGGGTTAATTAA	ACCATGTAACGTCAACCAGCCCGCGAGCAATAAATCCGAAGAGAAGTGCACGGATCCCCGGGTTAATTAA	CAACGTGAAGATCAAATAACGTCAAATGTATTAAATAGACTAAAATATTAGAATTCGAGCTCGTTTAAAC	0		0		0
YDL113C	ATG20,CVT20,SNX42	4	258316	260238	-	GTGCAATTGAACATACCATCTAGAAAAGTTGTCTTCTACAGCACACAATG	GTCAAAATTTAGAAATTTGGAAAGAAGTCAAAAGACATCAAGATTTTGCA	TATATATATCAAGTATGCTATAACGCTAAAAAAAAATGCTCATAATACTA	GTGCAATTGAACATACCATCTAGAAAAGTTGTCTTCTACAGCACACAATGCGGATCCCCGGGTTAATTAA	GTCAAAATTTAGAAATTTGGAAAGAAGTCAAAAGACATCAAGATTTTGCACGGATCCCCGGGTTAATTAA	TATATATATCAAGTATGCTATAACGCTAAAAAAAAATGCTCATAATACTAGAATTCGAGCTCGTTTAAAC	0		0		0
YDL112W	TRM3	4	260598	264908	+	TTGTTTAACGAACGTTACAAACTCTATACCTTTTTTTTACCAGCAAAATG	TTCAAACGGCAACCGCAGTTATCGTTCATTCCTATACAGTTCAACACATG	ATACTAAAAACTTCATGGTTAACAAAAGTGGGAATGAAACCTGATTCTTA	TTGTTTAACGAACGTTACAAACTCTATACCTTTTTTTTACCAGCAAAATGCGGATCCCCGGGTTAATTAA	TTCAAACGGCAACCGCAGTTATCGTTCATTCCTATACAGTTCAACACATGCGGATCCCCGGGTTAATTAA	ATACTAAAAACTTCATGGTTAACAAAAGTGGGAATGAAACCTGATTCTTAGAATTCGAGCTCGTTTAAAC	0		0		0
YDL111C	RRP42	4	264996	265793	-	TTTGACTAGCACAACGACAGTTTGAGATTCTGTTGAAATAATCATTTATG	CAATGGTGGAGAAATACGCCCCCGACGTAGTACGATCACTGGAGAATTTA	TTAGTATGTAAACTAATTTGTCTTTTTATCTAATTGTGACTATATTTTTA	TTTGACTAGCACAACGACAGTTTGAGATTCTGTTGAAATAATCATTTATGCGGATCCCCGGGTTAATTAA	CAATGGTGGAGAAATACGCCCCCGACGTAGTACGATCACTGGAGAATTTACGGATCCCCGGGTTAATTAA	TTAGTATGTAAACTAATTTGTCTTTTTATCTAATTGTGACTATATTTTTAGAATTCGAGCTCGTTTAAAC	0		0		0
YDL110C	TMA17	4	266195	266647	-	TAAAACATAAAGCAAATCAAAACATAATAACTACTACAAGTAACATAATG	ACATGGACAATTCAAATGTGGACGTCGTGACACCAAACAGCATATTCATT	AAGAGTATGACGTGAAAATGATGCGCAGTAAAACTAAATCCCGTCTCTTA	TAAAACATAAAGCAAATCAAAACATAATAACTACTACAAGTAACATAATGCGGATCCCCGGGTTAATTAA	ACATGGACAATTCAAATGTGGACGTCGTGACACCAAACAGCATATTCATTCGGATCCCCGGGTTAATTAA	AAGAGTATGACGTGAAAATGATGCGCAGTAAAACTAAATCCCGTCTCTTAGAATTCGAGCTCGTTTAAAC	0		0		0
YDL109C	YDL109C	4	266941	268884	-	CTCACCTGACCTTATTCACCCAAAAACATCGGGGAAACGGTAGTAATATG	CTAGCCAGCTCGCCAGCTCCTGGATTAGCAAGCATTCCTCTGTGACAGAT	CAATAGTAAATTGCAAGTCAATCCCGGGATGACGTCAAGATAGACAGTCA	CTCACCTGACCTTATTCACCCAAAAACATCGGGGAAACGGTAGTAATATGCGGATCCCCGGGTTAATTAA	CTAGCCAGCTCGCCAGCTCCTGGATTAGCAAGCATTCCTCTGTGACAGATCGGATCCCCGGGTTAATTAA	CAATAGTAAATTGCAAGTCAATCCCGGGATGACGTCAAGATAGACAGTCAGAATTCGAGCTCGTTTAAAC	0		0		0
YDL108W	KIN28	4	269381	270382	+	TACTTAAAAGTCATCAAAAAAAATATTCCCGGCCTCAGAGCGAACATATG	TCAAAGAATTACCACCACCAAGTGACCCGTCTTCAATAAAAATACGTAAC	ACATCTAATGTCAATAACACAGATTCTACAAATTTTATAAAATCATATCA	TACTTAAAAGTCATCAAAAAAAATATTCCCGGCCTCAGAGCGAACATATGCGGATCCCCGGGTTAATTAA	TCAAAGAATTACCACCACCAAGTGACCCGTCTTCAATAAAAATACGTAACCGGATCCCCGGGTTAATTAA	ACATCTAATGTCAATAACACAGATTCTACAAATTTTATAAAATCATATCAGAATTCGAGCTCGTTTAAAC	0		0		0
YDL107W	MSS2	4	270604	271659	+	TAGCAGACGAAAACGAAAACAAAAGCAAGAAATATCTGATCTAAAATATG	TTCTTGAAAGTAGAAAAGATTCCATAAAGTTGCTGGACAAAGCACGGCTT	GGAGACATGTGTCCTTATATAAATCGCAAAAAGAATCGATCAGACATTTA	TAGCAGACGAAAACGAAAACAAAAGCAAGAAATATCTGATCTAAAATATGCGGATCCCCGGGTTAATTAA	TTCTTGAAAGTAGAAAAGATTCCATAAAGTTGCTGGACAAAGCACGGCTTCGGATCCCCGGGTTAATTAA	GGAGACATGTGTCCTTATATAAATCGCAAAAAGAATCGATCAGACATTTAGAATTCGAGCTCGTTTAAAC	0		0		0
YDL106C	PHO2,GRF10,BAS2	4	271905	273584	-	GGCTAGACAAGTCACGGCTTACTGCTAAATAACGTATACAATACGCTATG	CAGATTTTTTGAAGAACACTAACGAACTAACTGACGAGCATAGATGGATA	AGAGTTGAAAATGCAATCGCAAAAAAAAAAAAACAGAATTATTTTCATCA	GGCTAGACAAGTCACGGCTTACTGCTAAATAACGTATACAATACGCTATGCGGATCCCCGGGTTAATTAA	CAGATTTTTTGAAGAACACTAACGAACTAACTGACGAGCATAGATGGATACGGATCCCCGGGTTAATTAA	AGAGTTGAAAATGCAATCGCAAAAAAAAAAAAACAGAATTATTTTCATCAGAATTCGAGCTCGTTTAAAC	0		0		0
YDL105W	NSE4,QRI2	4	274072	275280	+	ATCAAGAAATCAGAGTTTTGCAAAAAAAAGAGAGTACAGACAGAGACATG	CTTGGCGAAAACTAATAAAGAAATACAACATCACTTCACCATTCTTAGAC	AAAAAAAAAAAAAAACTGTACATATTATATGCAGCGCTCTATCGCTGTTA	ATCAAGAAATCAGAGTTTTGCAAAAAAAAGAGAGTACAGACAGAGACATGCGGATCCCCGGGTTAATTAA	CTTGGCGAAAACTAATAAAGAAATACAACATCACTTCACCATTCTTAGACCGGATCCCCGGGTTAATTAA	AAAAAAAAAAAAAAACTGTACATATTATATGCAGCGCTCTATCGCTGTTAGAATTCGAGCTCGTTTAAAC	0		0		0
YDL104C	QRI7	4	275336	276559	-	CTGAAATAAGTAGAGTAGAAGAAAGGATAGAAACTTTTTTTTTCATTATG	GGCCATTGAATGACCTATTAAGTGTTGATGGTTGGAGAACGGACCAGCTA	GAGCGCTGCATATAATATGTACAGTTTTTTTTTTTTTTTTTTTTTTTTCA	CTGAAATAAGTAGAGTAGAAGAAAGGATAGAAACTTTTTTTTTCATTATGCGGATCCCCGGGTTAATTAA	GGCCATTGAATGACCTATTAAGTGTTGATGGTTGGAGAACGGACCAGCTACGGATCCCCGGGTTAATTAA	GAGCGCTGCATATAATATGTACAGTTTTTTTTTTTTTTTTTTTTTTTTCAGAATTCGAGCTCGTTTAAAC	0		0		0
YDL103C	QRI1,UAP1	4	276831	278264	-	GCAAAGAAACGCAGATATAAAGGAGAACACCAGATCGAACTGCAACTATG	CCCAGTTCAAAGGTAAAGTCTTTGACAGAAGTGGTATAGTATTAGAAAAA	TACTTTTCAATTACATGTTAAAAGTGCTTCATAAGTAGCTCAAACAGTTA	GCAAAGAAACGCAGATATAAAGGAGAACACCAGATCGAACTGCAACTATGCGGATCCCCGGGTTAATTAA	CCCAGTTCAAAGGTAAAGTCTTTGACAGAAGTGGTATAGTATTAGAAAAACGGATCCCCGGGTTAATTAA	TACTTTTCAATTACATGTTAAAAGTGCTTCATAAGTAGCTCAAACAGTTAGAATTCGAGCTCGTTTAAAC	0		0		0
YDL102W	POL3,CDC2,TEX1,HPR6	4	278555	281848	+	TGAGCACTTGCTATTAAGCATTAATCTTTATACATATACGCACAGCAATG	TTAAGGTTAAAAAAGAGCTGCAGGAGAAAGTAGAACAATTAAGCAAATGG	TTGTTAGCCTTTCTTAATCCTAATATGATGTGCCACCCTATCGTTTTTTA	TGAGCACTTGCTATTAAGCATTAATCTTTATACATATACGCACAGCAATGCGGATCCCCGGGTTAATTAA	TTAAGGTTAAAAAAGAGCTGCAGGAGAAAGTAGAACAATTAAGCAAATGGCGGATCCCCGGGTTAATTAA	TTGTTAGCCTTTCTTAATCCTAATATGATGTGCCACCCTATCGTTTTTTAGAATTCGAGCTCGTTTAAAC	0		0		0
YDL101C	DUN1	4	281990	283531	-	CAAGTAAAGGGGCTTAACATACAGTAAAAAAGGCAATTATAGTGAAGATG	AAATTACTGACAATAAAATACCCAAAACATACTCAGAATTATCTTGCCTC	GAAAAATCCAGATTCAAACAATGTTTTTGAAATAATGCTTCTCATGTTTA	CAAGTAAAGGGGCTTAACATACAGTAAAAAAGGCAATTATAGTGAAGATGCGGATCCCCGGGTTAATTAA	AAATTACTGACAATAAAATACCCAAAACATACTCAGAATTATCTTGCCTCCGGATCCCCGGGTTAATTAA	GAAAAATCCAGATTCAAACAATGTTTTTGAAATAATGCTTCTCATGTTTAGAATTCGAGCTCGTTTAAAC	0		0		0
YDL100C	GET3,ARR4	4	283795	284859	-	TTTAGGAAAACGTACGACAAGAACAAGAAGATCATCACATTGTAATTATG	ATAACCCTATTACTGATGGCAAAGTCATTTATGAGTTAGAAGATAAGGAA	TCTATGGTTATATGTCGTATGTATCTATTTATGGTATTCAGGGGCTTCTA	TTTAGGAAAACGTACGACAAGAACAAGAAGATCATCACATTGTAATTATGCGGATCCCCGGGTTAATTAA	ATAACCCTATTACTGATGGCAAAGTCATTTATGAGTTAGAAGATAAGGAACGGATCCCCGGGTTAATTAA	TCTATGGTTATATGTCGTATGTATCTATTTATGGTATTCAGGGGCTTCTAGAATTCGAGCTCGTTTAAAC	0		0		0
YDL099W	BUG1	4	285102	286127	+	TTTGCATTGAACCAACCTGAATTGAGCAAGTTTATCATATAGTTACAATG	TAGACATGACCACTTGGAGAAGTATTGGTTCTGGCCCAATAATGGAATTT	ATGTATATAAACCCTTAATTAAAATATATACGCGAAAATATTCATTCTCA	TTTGCATTGAACCAACCTGAATTGAGCAAGTTTATCATATAGTTACAATGCGGATCCCCGGGTTAATTAA	TAGACATGACCACTTGGAGAAGTATTGGTTCTGGCCCAATAATGGAATTTCGGATCCCCGGGTTAATTAA	ATGTATATAAACCCTTAATTAAAATATATACGCGAAAATATTCATTCTCAGAATTCGAGCTCGTTTAAAC	0		0		0
YDL098C	SNU23	4	286264	286848	-	ACCAGAAGTTCCTACAAGCCTTAGCTGACAAAAATTCGAGAAAGCTAATG	CAAAAGTCAGTCAAATGATGGGATTTTCCAATTTTGCCACCTCTAAAAAA	TATGTGCTCTATGCTTGTATTATGCTCATTTATCTTTACTTGGTTTCTCA	ACCAGAAGTTCCTACAAGCCTTAGCTGACAAAAATTCGAGAAAGCTAATGCGGATCCCCGGGTTAATTAA	CAAAAGTCAGTCAAATGATGGGATTTTCCAATTTTGCCACCTCTAAAAAACGGATCCCCGGGTTAATTAA	TATGTGCTCTATGCTTGTATTATGCTCATTTATCTTTACTTGGTTTCTCAGAATTCGAGCTCGTTTAAAC	0		0		0
YDL097C	RPN6,NAS4	4	287074	288378	-	GCGCTGAAAGAGGACAATTGGTGATTAATCTATAAACGAGGAACTTCATG	AACTAAATAAAGTCGTCGATCAACTATTTGAAAAGGCAAGTGTCTTGTAT	CTTACTCTGGTACTTGTGAGTATACATACATATATATACATGTAAACCTA	GCGCTGAAAGAGGACAATTGGTGATTAATCTATAAACGAGGAACTTCATGCGGATCCCCGGGTTAATTAA	AACTAAATAAAGTCGTCGATCAACTATTTGAAAAGGCAAGTGTCTTGTATCGGATCCCCGGGTTAATTAA	CTTACTCTGGTACTTGTGAGTATACATACATATATATACATGTAAACCTAGAATTCGAGCTCGTTTAAAC	0		0		0
YDL096C	OPI6	4	288681	289007	-	ACATCTTTGCAAGAGGAGGATGCACATCCATGAAGTAAGTCCCCCTAATG	TTGTAGCTGTTAGCTGTTTCTTGATAGGCTCTTCTGATACTACCTCGCTT	GATCTTGATTATTTTCGAGCAGCAAAACAAGACAAACAGGTGCATTGTTA	ACATCTTTGCAAGAGGAGGATGCACATCCATGAAGTAAGTCCCCCTAATGCGGATCCCCGGGTTAATTAA	TTGTAGCTGTTAGCTGTTTCTTGATAGGCTCTTCTGATACTACCTCGCTTCGGATCCCCGGGTTAATTAA	GATCTTGATTATTTTCGAGCAGCAAAACAAGACAAACAGGTGCATTGTTAGAATTCGAGCTCGTTTAAAC	1	YDL095W	1	YDL095W	0
YDL095W	PMT1	4	288742	291195	+	TATCAGAAGAGCCTATCAAGAAACAGCTAACAGCTACAAGCACGGTCATG	AAGAGGAGGGAGCTAACATTTTAAAAGTAGAAAAAAGGGCTGTTTTGGAA	GAGCTTATAGAAGACTTTACATAAAAATGTGGAGAGTACTGGGAAATTTA	TATCAGAAGAGCCTATCAAGAAACAGCTAACAGCTACAAGCACGGTCATGCGGATCCCCGGGTTAATTAA	AAGAGGAGGGAGCTAACATTTTAAAAGTAGAAAAAAGGGCTGTTTTGGAACGGATCCCCGGGTTAATTAA	GAGCTTATAGAAGACTTTACATAAAAATGTGGAGAGTACTGGGAAATTTAGAATTCGAGCTCGTTTAAAC	1	YDL096C	1	YDL096C	0
YDL094C	YDL094C	4	291255	291764	-	CACCAAAAACAACACTATTTGGCAGGGAGATATTGTGTAGCCTTACGATG	TTCAAGACATTTTTTTTATTCATGATGTTTTTTTTGTCTATTTTCGTTTT	TCTCCACATTTTTATGTAAAGTCTTCTATAAGCTCTCGAGCGTATAATTA	CACCAAAAACAACACTATTTGGCAGGGAGATATTGTGTAGCCTTACGATGCGGATCCCCGGGTTAATTAA	TTCAAGACATTTTTTTTATTCATGATGTTTTTTTTGTCTATTTTCGTTTTCGGATCCCCGGGTTAATTAA	TCTCCACATTTTTATGTAAAGTCTTCTATAAGCTCTCGAGCGTATAATTAGAATTCGAGCTCGTTTAAAC	1	YDL093W	1	YDL093W	0
YDL093W	PMT5	4	291592	293823	+	TTGATTTAACAATTAAGCAGGTGTGTAAGATCATAACTGCTTTAAAGATG	GCAATTCACTATTACTATCCGATAGCCACTATGAATTAAACGCTGAATCA	TAAATCTTTTGCTAAACGAATGTCCAATCTGAATACGGGTGGATGGATCA	TTGATTTAACAATTAAGCAGGTGTGTAAGATCATAACTGCTTTAAAGATGCGGATCCCCGGGTTAATTAA	GCAATTCACTATTACTATCCGATAGCCACTATGAATTAAACGCTGAATCACGGATCCCCGGGTTAATTAA	TAAATCTTTTGCTAAACGAATGTCCAATCTGAATACGGGTGGATGGATCAGAATTCGAGCTCGTTTAAAC	1	YDL094C	1	YDL094C	0
YDL092W	SRP14	4	294464	294904	+	TCTTTAATACAAATCAAAAAACGTAGCTTTCTTACCACCCTAAAACAATG	ACGGTACCATCAGTAAGACAGGAAAGAAAAACAAGGTAGCGAAGAAAAAC	AAGATAACAAGAGGCGCACATGCCTTTTGACTCAAGTGTCACGTGCATCA	TCTTTAATACAAATCAAAAAACGTAGCTTTCTTACCACCCTAAAACAATGCGGATCCCCGGGTTAATTAA	ACGGTACCATCAGTAAGACAGGAAAGAAAAACAAGGTAGCGAAGAAAAACCGGATCCCCGGGTTAATTAA	AAGATAACAAGAGGCGCACATGCCTTTTGACTCAAGTGTCACGTGCATCAGAATTCGAGCTCGTTTAAAC	0		0		0
YDL091C	UBX3	4	295075	296442	-	GTACCTCATCAATCGGCTTGACTGCGATTTAAACATACCCTTTAAACATG	TTAGCGGCATATATCCATCAGGAAATATTGTAATGGAACGCCTGGACGAA	TAAACTTTAGAATAAACGTTTTGAGATGACTATTTTTGAAATTCCTTTCA	GTACCTCATCAATCGGCTTGACTGCGATTTAAACATACCCTTTAAACATGCGGATCCCCGGGTTAATTAA	TTAGCGGCATATATCCATCAGGAAATATTGTAATGGAACGCCTGGACGAACGGATCCCCGGGTTAATTAA	TAAACTTTAGAATAAACGTTTTGAGATGACTATTTTTGAAATTCCTTTCAGAATTCGAGCTCGTTTAAAC	0		0		0
YDL090C	RAM1,STE16,SGP2,SCG2,FUS8,DPR1	4	296717	298012	-	TGCAGAAACAACTGCAGTGCTTGTAAAGCTATAGGCAATCAAAGCGTATG	ATGTAAGAAAAATTATCCACTACTTTAAATCCAATTTATCTTCTCCAAGT	AGACTGACCGCTAAGGAGATTGAATACATATATATAATAGTATGTGGTTA	TGCAGAAACAACTGCAGTGCTTGTAAAGCTATAGGCAATCAAAGCGTATGCGGATCCCCGGGTTAATTAA	ATGTAAGAAAAATTATCCACTACTTTAAATCCAATTTATCTTCTCCAAGTCGGATCCCCGGGTTAATTAA	AGACTGACCGCTAAGGAGATTGAATACATATATATAATAGTATGTGGTTAGAATTCGAGCTCGTTTAAAC	0		0		0
YDL089W	YDL089W	4	298503	299957	+	AACTTTGTTGTGCAGTAGAGAGCTTTACATTTACCTTCGGCAGTAAAATG	TTAATTCCATTCTTCGCTCTCCAAAGAAAAAGAAGAACTATCACAAAAGA	TATTGATTTTTACGTAACTGTATATACTTAGACATAATTAAGAAACGTTA	AACTTTGTTGTGCAGTAGAGAGCTTTACATTTACCTTCGGCAGTAAAATGCGGATCCCCGGGTTAATTAA	TTAATTCCATTCTTCGCTCTCCAAAGAAAAAGAAGAACTATCACAAAAGACGGATCCCCGGGTTAATTAA	TATTGATTTTTACGTAACTGTATATACTTAGACATAATTAAGAAACGTTAGAATTCGAGCTCGTTTAAAC	0		0		0
YDL088C	ASM4,NUP59	4	300100	301686	-	TTTTTTTTTTTTCTCTGTAACCTGAAAACAAGGAACGGCAAATTAAAATG	CTGGTTTTACGCACAAACTGAGTAATTGGTTATTTGGTTGGAATGACCTA	TATGAAGTATTGTAAATGTTCATGAATAATTAGCTGGACGATTTCTGTTA	TTTTTTTTTTTTCTCTGTAACCTGAAAACAAGGAACGGCAAATTAAAATGCGGATCCCCGGGTTAATTAA	CTGGTTTTACGCACAAACTGAGTAATTGGTTATTTGGTTGGAATGACCTACGGATCCCCGGGTTAATTAA	TATGAAGTATTGTAAATGTTCATGAATAATTAGCTGGACGATTTCTGTTAGAATTCGAGCTCGTTTAAAC	0		0		0
YDL087C	LUC7,EPE1,EXM2	4	301897	302682	-	ACAAAAGGCTCTACACTCCCAGCAGAAAGCTGCCAACTACCGTCAGAATG	CAACTAACGCCAGCAAGACAGCTACTACACTACCCGGAAGACGCTTTGTG	TCTCCTTCGAACAAAATTTTTCTAGCATCATTTTTTTATGTATGGCCCTA	ACAAAAGGCTCTACACTCCCAGCAGAAAGCTGCCAACTACCGTCAGAATGCGGATCCCCGGGTTAATTAA	CAACTAACGCCAGCAAGACAGCTACTACACTACCCGGAAGACGCTTTGTGCGGATCCCCGGGTTAATTAA	TCTCCTTCGAACAAAATTTTTCTAGCATCATTTTTTTATGTATGGCCCTAGAATTCGAGCTCGTTTAAAC	0		0		0
YDL086W	YDL086W	4	303096	303917	+	CTGAAAATGACGCCGTAATAAACTCGTGGTAGTAGATAAAGCAAACAATG	TCGATTTGGGTGAATTTGTCGATGACAATACACCTTTGGAGCACGTTTGT	CTTTTTCTTATTGTTATTTAGTATATAGCGTGTACAGAGTGAAGATCTTA	CTGAAAATGACGCCGTAATAAACTCGTGGTAGTAGATAAAGCAAACAATGCGGATCCCCGGGTTAATTAA	TCGATTTGGGTGAATTTGTCGATGACAATACACCTTTGGAGCACGTTTGTCGGATCCCCGGGTTAATTAA	CTTTTTCTTATTGTTATTTAGTATATAGCGTGTACAGAGTGAAGATCTTAGAATTCGAGCTCGTTTAAAC	1	YDL086C-A	1	YDL086C-A	0
YDL086C-A	YDL086C-A	4	303338	303772	-	TTTGAGTGATAGCGGAGTCGAACCTGCCCTTGCTGAACTCGTCACGGATG	ACGGCTTCTTGATCTTGTACTCGTTACCAATATCGGTACCCTGCACGTCA	GTGGCACCTGCCATATACCACAACTTTATGGGCCCTGAAGCGTTGCCCTA	TTTGAGTGATAGCGGAGTCGAACCTGCCCTTGCTGAACTCGTCACGGATGCGGATCCCCGGGTTAATTAA	ACGGCTTCTTGATCTTGTACTCGTTACCAATATCGGTACCCTGCACGTCACGGATCCCCGGGTTAATTAA	GTGGCACCTGCCATATACCACAACTTTATGGGCCCTGAAGCGTTGCCCTAGAATTCGAGCTCGTTTAAAC	1	YDL086W	1	YDL086W	0
YDL085C-A	YDL085C-A	4	304147	304353	-	ACTACACAGAGCAACAAATTACGTCGCAAGACGATACATCTTTAACAATG	GAAGAGAGGCTGAAAAGCTTGAGAAGTTAAAAGCCGAAAAGACGAGAAGA	TACTGGCACTATTCATTCCAATAAAAGGACAGGTATAAAGTGTCTGCTTA	ACTACACAGAGCAACAAATTACGTCGCAAGACGATACATCTTTAACAATGCGGATCCCCGGGTTAATTAA	GAAGAGAGGCTGAAAAGCTTGAGAAGTTAAAAGCCGAAAAGACGAGAAGACGGATCCCCGGGTTAATTAA	TACTGGCACTATTCATTCCAATAAAAGGACAGGTATAAAGTGTCTGCTTAGAATTCGAGCTCGTTTAAAC	0		0		0
YDL085W	NDE2,NDH2	4	304894	306531	+	ACATAGTAGAAAGACAAAAACAACCACCGTACTTGCCATTCGTATAGATG	TTGCCATGGACTGGACCAAAGTTTACTTTCTTGGAAGGGATTCCTCCGTG	TGATAGTAAACAATTTGAATTGGAACAATGAATATATAAAACAAGGACTA	ACATAGTAGAAAGACAAAAACAACCACCGTACTTGCCATTCGTATAGATGCGGATCCCCGGGTTAATTAA	TTGCCATGGACTGGACCAAAGTTTACTTTCTTGGAAGGGATTCCTCCGTGCGGATCCCCGGGTTAATTAA	TGATAGTAAACAATTTGAATTGGAACAATGAATATATAAAACAAGGACTAGAATTCGAGCTCGTTTAAAC	0		0		0
YDL084W	SUB2	4	306920	308260	+	GGCAATAGGTTAAAAAAAGCTCGTTCATTTTTTTAAAAACAGCAACGATG	TCGCTGAATTCCCAGAAGAAGGCATTGATCCGTCCACTTATTTGAATAAT	ACAAAATCTTTATATAATCTATATAAAAACGTATCTTTTTTCCTTTATTA	GGCAATAGGTTAAAAAAAGCTCGTTCATTTTTTTAAAAACAGCAACGATGCGGATCCCCGGGTTAATTAA	TCGCTGAATTCCCAGAAGAAGGCATTGATCCGTCCACTTATTTGAATAATCGGATCCCCGGGTTAATTAA	ACAAAATCTTTATATAATCTATATAAAAACGTATCTTTTTTCCTTTATTAGAATTCGAGCTCGTTTAAAC	0		0		0
YDL083C	RPS16B	4	308609	309472	-	TTATTTAGCAGTGTTTCGAAAAATACAGCAAGAGAATAAGCAACAAGATG	AGAAATTCGGTGGTAAGGGTGCTCGTTCTAGATTCCAAAAATCTTACCGT	GTGCAAAGAAAAGTGAAGAGATTTCTGGAAAAAATCTTGAAATTTTCTTA	TTATTTAGCAGTGTTTCGAAAAATACAGCAAGAGAATAAGCAACAAGATGCGGATCCCCGGGTTAATTAA	AGAAATTCGGTGGTAAGGGTGCTCGTTCTAGATTCCAAAAATCTTACCGTCGGATCCCCGGGTTAATTAA	GTGCAAAGAAAAGTGAAGAGATTTCTGGAAAAAATCTTGAAATTTTCTTAGAATTCGAGCTCGTTTAAAC	0		0		0
YDL082W	RPL13A	4	310107	311071	+	AAGGGGTTTGAGAAAAGCATAGTACAGCACAGCAGGAATCGTACACAATG	GAGAAAAGAGAGCTAGAGAAAAGGCTGAAGCTGAAGCTGAAAAGAAGAAA	AAATACAAAAATTGTGGATGAAAAATTCTTTGATGAAGTTTTTAGATCTA	AAGGGGTTTGAGAAAAGCATAGTACAGCACAGCAGGAATCGTACACAATGCGGATCCCCGGGTTAATTAA	GAGAAAAGAGAGCTAGAGAAAAGGCTGAAGCTGAAGCTGAAAAGAAGAAACGGATCCCCGGGTTAATTAA	AAATACAAAAATTGTGGATGAAAAATTCTTTGATGAAGTTTTTAGATCTAGAATTCGAGCTCGTTTAAAC	0		0		0
YDL081C	RPP1A,RPLA1	4	311485	311805	-	TCCAATACAACAGCTTAAACCGATTATCTCTAAAATAACAAGAAGAAATG	AAGAAGCTAAAGAAGAATCCGATGACGACATGGGTTTCGGTTTATTTGAT	ATTTTAAATGTTAGAATATGCAATTTCTTCTAAACAGTGCGGCACTTCTA	TCCAATACAACAGCTTAAACCGATTATCTCTAAAATAACAAGAAGAAATGCGGATCCCCGGGTTAATTAA	AAGAAGCTAAAGAAGAATCCGATGACGACATGGGTTTCGGTTTATTTGATCGGATCCCCGGGTTAATTAA	ATTTTAAATGTTAGAATATGCAATTTCTTCTAAACAGTGCGGCACTTCTAGAATTCGAGCTCGTTTAAAC	0		0		0
YDL080C	THI3,KID1	4	312325	314154	-	GGTTTGAAAGAACATAACTACTAAAACGCACCGTCGTCATTCTGAAGATG	CGCCAACTCCAGAATTCCAACCACTTCTAAAAAAAAATCAAGTTGGATAC	CGAGCGGTAATCATGAGGGTCCCTGGTAGTAGGGCGGAGAGATCAGATCA	GGTTTGAAAGAACATAACTACTAAAACGCACCGTCGTCATTCTGAAGATGCGGATCCCCGGGTTAATTAA	CGCCAACTCCAGAATTCCAACCACTTCTAAAAAAAAATCAAGTTGGATACCGGATCCCCGGGTTAATTAA	CGAGCGGTAATCATGAGGGTCCCTGGTAGTAGGGCGGAGAGATCAGATCAGAATTCGAGCTCGTTTAAAC	0		0		0
YDL079C	MRK1	4	314634	316431	-	AAAATAATCTCAAGATTGAAGAGGTGAAAATTGTAAAATAGTCTACTATG	CCATTGAAGAACGGTTGAAACATTTTGTTTCTGCACCTTCATCGTCTTTG	TAATAGTAATGATACAATAGACTAAGAAATTTGAAGGATGAGATATATCA	AAAATAATCTCAAGATTGAAGAGGTGAAAATTGTAAAATAGTCTACTATGCGGATCCCCGGGTTAATTAA	CCATTGAAGAACGGTTGAAACATTTTGTTTCTGCACCTTCATCGTCTTTGCGGATCCCCGGGTTAATTAA	TAATAGTAATGATACAATAGACTAAGAAATTTGAAGGATGAGATATATCAGAATTCGAGCTCGTTTAAAC	0		0		0
YDL078C	MDH3	4	317040	318071	-	CACTTGTCAGTGCAAAAGAAAATAAAAAGAGACAAACAATCATAAACATG	GCAAGAATATTGAAAAAGGCAAGAGTTTCATCCTAGACTCTTCCAAGCTA	GATACAAAGGAGTATAGAGTTAAGAAAAATATAAAAATTGAAGTAGCTCA	CACTTGTCAGTGCAAAAGAAAATAAAAAGAGACAAACAATCATAAACATGCGGATCCCCGGGTTAATTAA	GCAAGAATATTGAAAAAGGCAAGAGTTTCATCCTAGACTCTTCCAAGCTACGGATCCCCGGGTTAATTAA	GATACAAAGGAGTATAGAGTTAAGAAAAATATAAAAATTGAAGTAGCTCAGAATTCGAGCTCGTTTAAAC	0		0		0
YDL077C	VAM6,VPS39,VPL22,VPL18,CVT4	4	318654	321803	-	TTGATCAGCAAAAACCCTTCAAAATATCAATTTATACCAAAAATTAAATG	GAATTAAACAGAAGACTTTGGGAGAAGTTATAAATGAGCTAAATAATAAG	TATATATAAGAAATACTAACAACAATAACAGCAGCTGTTAAGGGATCTTA	TTGATCAGCAAAAACCCTTCAAAATATCAATTTATACCAAAAATTAAATGCGGATCCCCGGGTTAATTAA	GAATTAAACAGAAGACTTTGGGAGAAGTTATAAATGAGCTAAATAATAAGCGGATCCCCGGGTTAATTAA	TATATATAAGAAATACTAACAACAATAACAGCAGCTGTTAAGGGATCTTAGAATTCGAGCTCGTTTAAAC	0		0		0
YDL076C	RXT3	4	322351	323235	-	TCGCAGTTTTTTTTTTGAGAGAAGTAACAATACAATATAAGATAAAAATG	GAGATAAACCTCATGAACCAAACGGGTATATTAAAAATTTAAAATGGACC	AACTAAGGTTGGAAGGGAAAGAAGGACGACCAATATTATGTCTTTCCTTA	TCGCAGTTTTTTTTTTGAGAGAAGTAACAATACAATATAAGATAAAAATGCGGATCCCCGGGTTAATTAA	GAGATAAACCTCATGAACCAAACGGGTATATTAAAAATTTAAAATGGACCCGGATCCCCGGGTTAATTAA	AACTAAGGTTGGAAGGGAAAGAAGGACGACCAATATTATGTCTTTCCTTAGAATTCGAGCTCGTTTAAAC	0		0		0
YDL075W	RPL31A,RPL34	4	323909	324671	+	TTTTAAAGAAAGAATTAATAAGCAAACAGAACTCAATCAAAGGAAAAATG	TAGTTGCTTCTGCCAAGGGTCTACAAACTGTTGTTGTCGAAGAAGATGCT	CTTTATATTTATTAATATAAAATGAGTATTATTTTTATTTAATTGATTTA	TTTTAAAGAAAGAATTAATAAGCAAACAGAACTCAATCAAAGGAAAAATGCGGATCCCCGGGTTAATTAA	TAGTTGCTTCTGCCAAGGGTCTACAAACTGTTGTTGTCGAAGAAGATGCTCGGATCCCCGGGTTAATTAA	CTTTATATTTATTAATATAAAATGAGTATTATTTTTATTTAATTGATTTAGAATTCGAGCTCGTTTAAAC	0		0		0
YDL074C	BRE1	4	325730	327832	-	GCTTTCACCGTTTTTATGCTAATCGTGCTAGCTGATAATAATCAGATATG	CTACATGCAACAAAGCATTCAGTTCCAATGATTTATTGACAGTGCACTTG	GTGGAGGATATAACACAAACAGTGGAAAAGTGGTAGAATAATTAGTATTA	GCTTTCACCGTTTTTATGCTAATCGTGCTAGCTGATAATAATCAGATATGCGGATCCCCGGGTTAATTAA	CTACATGCAACAAAGCATTCAGTTCCAATGATTTATTGACAGTGCACTTGCGGATCCCCGGGTTAATTAA	GTGGAGGATATAACACAAACAGTGGAAAAGTGGTAGAATAATTAGTATTAGAATTCGAGCTCGTTTAAAC	0		0		0
YDL073W	YDL073W	4	328296	331250	+	CTATATACGCATTGTTGTAGCACTAAAGATCATATTGCTCATTAAGCATG	ATTTTGAAGTGAGGAAACCTAGTAGTAATAATTCTATTAATATCAAAGTC	TAATAATAATAATACTACACGTTTACGTATGTAACTCATTCTATTATTCA	CTATATACGCATTGTTGTAGCACTAAAGATCATATTGCTCATTAAGCATGCGGATCCCCGGGTTAATTAA	ATTTTGAAGTGAGGAAACCTAGTAGTAATAATTCTATTAATATCAAAGTCCGGATCCCCGGGTTAATTAA	TAATAATAATAATACTACACGTTTACGTATGTAACTCATTCTATTATTCAGAATTCGAGCTCGTTTAAAC	0		0		0
YDL072C	YET3	4	331519	332130	-	ACCACGTCACATTATACTCATAACCATAGAATTCACAGAATTGAATCATG	AAATTGCACGTTTAAAGGAGAAGTCGGAATCGTTGCAAGAAGAAATAAAT	ATATATATACACACTTCTGTGCAGAAGAAAAGGAATAAAACGTCAAACTA	ACCACGTCACATTATACTCATAACCATAGAATTCACAGAATTGAATCATGCGGATCCCCGGGTTAATTAA	AAATTGCACGTTTAAAGGAGAAGTCGGAATCGTTGCAAGAAGAAATAAATCGGATCCCCGGGTTAATTAA	ATATATATACACACTTCTGTGCAGAAGAAAAGGAATAAAACGTCAAACTAGAATTCGAGCTCGTTTAAAC	0		0		0
YDL071C	YDL071C	4	332349	332723	-	CACTCTGTGGTGCTGCCAGTAAAGCAGAATGTGCGTGTCTTGTATCCATG	CCTGTTCACCCTCTATGCGTAAACACTTGCGCGTTTCTCCCTTTCTCTTT	TAGCTAAAAAAAGAAAGAGGCGAAAAAAGAGTGCAACGTCAACAACGCTA	CACTCTGTGGTGCTGCCAGTAAAGCAGAATGTGCGTGTCTTGTATCCATGCGGATCCCCGGGTTAATTAA	CCTGTTCACCCTCTATGCGTAAACACTTGCGCGTTTCTCCCTTTCTCTTTCGGATCCCCGGGTTAATTAA	TAGCTAAAAAAAGAAAGAGGCGAAAAAAGAGTGCAACGTCAACAACGCTAGAATTCGAGCTCGTTTAAAC	1	YDL070W	1	YDL070W	0
YDL070W	BDF2	4	332707	334623	+	CGGAAAAACTGAAACAAACAGATTGAGCGAAATAAACCTCGGCGGCTATG	ATTCCGATTCTGAAGAAGACAGTAGTGATAGTAGCGACAGTGACAGTGAT	TTCTTTTCTTTTTTTCCTTAATTAGGGCATGAAGCCCATTTCGATTGTTA	CGGAAAAACTGAAACAAACAGATTGAGCGAAATAAACCTCGGCGGCTATGCGGATCCCCGGGTTAATTAA	ATTCCGATTCTGAAGAAGACAGTAGTGATAGTAGCGACAGTGACAGTGATCGGATCCCCGGGTTAATTAA	TTCTTTTCTTTTTTTCCTTAATTAGGGCATGAAGCCCATTTCGATTGTTAGAATTCGAGCTCGTTTAAAC	1	YDL071C	1	YDL071C	0
[truncated: 5,727 more rows]

## Sheet: ncRNA
Species: Saccharomyces cerevisiae
Strain: W303
Systematic name	Common name	Chromosome	Start	End	Strand	Forward deletion	Reverse deletion	Forward deletion pFA6a	Reverse pFA6a	Overlapping gene	Overlapping gene	Overlapping CDS	Overlapping CDS	Overlapping ncRNA	Overlapping ncRNA
[truncated: 446 more rows]

## Sheet: tRNA
Species: Saccharomyces cerevisiae
Strain: W303
[truncated: 276 more rows]
