# Supplementary material for: PRIMED: PRIMEr Database for Deleting and Tagging All Fission and Budding Yeast Genes Developed Using the Open-Source Genome Retrieval Script (GRS)
Source: PLoS One. 2015 Feb 2;10(2):e0116657. doi: 10.1371/journal.pone.0116657 (PMC4314071; doi:10.1371/journal.pone.0116657)
Supplement: S6 Table — (XLSX) [file pone.0116657.s009.xlsx]

## Sheet: CDS
Species: Saccharomyces cerevisiae
Strain: Y55
Systematic name	Common name	Chromosome	Start	End	Strand	Forward deletion	Forward tagging	Reverse deletion	Forward deletion pFA6a	Forward tagging pFA6a	Reverse pFA6a	Overlapping gene	Overlapping gene	Overlapping CDS	Overlapping CDS	Overlapping ncRNA	Overlapping ncRNA
YAL069W	YAL069W	1	925	1235	+	GCTACTCACCATACTGTTGTTCACCCACCATATTGAAACGCTAACAAATG	TTATCCACATTTTAATATCTATATCTCATTCGGCGGCCCCAAATATTGTA	GGTAAGTATATGGTGCAAAAGTGGTATAACGTATGTACTAAGAGCAGTTA	GCTACTCACCATACTGTTGTTCACCCACCATATTGAAACGCTAACAAATGCGGATCCCCGGGTTAATTAA	TTATCCACATTTTAATATCTATATCTCATTCGGCGGCCCCAAATATTGTACGGATCCCCGGGTTAATTAA	GGTAAGTATATGGTGCAAAAGTGGTATAACGTATGTACTAAGAGCAGTTAGAATTCGAGCTCGTTTAAAC	1	YAL068W-A	1	YAL068W-A	0
YAL068W-A	YAL068W-A	1	1124	2900	+	TCCATGGCCCATCCTCACTAAATCAGTACAAATGCACTCACATCACTATG	TGACTCTGTCACGTATCCATTGGAGNNNNNNNNNNNNNNNNNNNNNNNNN	NNNNNNNNNNNNNNNNNNNNNNNNNNNNNNNNNNNNNNNNNNNNNNNNNN	TCCATGGCCCATCCTCACTAAATCAGTACAAATGCACTCACATCACTATGCGGATCCCCGGGTTAATTAA	TGACTCTGTCACGTATCCATTGGAGNNNNNNNNNNNNNNNNNNNNNNNNNCGGATCCCCGGGTTAATTAA	NNNNNNNNNNNNNNNNNNNNNNNNNNNNNNNNNNNNNNNNNNNNNNNNNNGAATTCGAGCTCGTTTAAAC	1	YAL069W	1	YAL069W	0
YAL068C	PAU8	1	4125	4487	-	TCTTTCCTGTTAAGCTTATATCAGCACTAACAAACAAAACAAATACAATG	CAGCCATCTCCAGTGCTCTATCCAAGGACGGTATCTACACTATCGCAAAC	NNNNNNNNNNNNNNNNNNNNNNNNNNNNNNNNNNNNNNNNNNNNNNNCTA	TCTTTCCTGTTAAGCTTATATCAGCACTAACAAACAAAACAAATACAATGCGGATCCCCGGGTTAATTAA	CAGCCATCTCCAGTGCTCTATCCAAGGACGGTATCTACACTATCGCAAACCGGATCCCCGGGTTAATTAA	NNNNNNNNNNNNNNNNNNNNNNNNNNNNNNNNNNNNNNNNNNNNNNNCTAGAATTCGAGCTCGTTTAAAC	0		0		0
YAL067W-A	YAL067W-A	1	4796	5022	+	TACTGTTTTATGGCACTCATGTGTATTCGTATGCGTAGAATGTGGGAATG	ATCTCTTGAATTCGTACAACATTAAACGTGTGTTGGGAGTCGTATACTGT	CGTAATTGCACCAAGGCATTTGCCGAGAGTTCACAAGTTTACAGAACCTA	TACTGTTTTATGGCACTCATGTGTATTCGTATGCGTAGAATGTGGGAATGCGGATCCCCGGGTTAATTAA	ATCTCTTGAATTCGTACAACATTAAACGTGTGTTGGGAGTCGTATACTGTCGGATCCCCGGGTTAATTAA	CGTAATTGCACCAAGGCATTTGCCGAGAGTTCACAAGTTTACAGAACCTAGAATTCGAGCTCGTTTAAAC	0		0		0
YAL067C	SEO1	1	9551	11332	-	GTTAAAAAAAATTACAAAGAGAACTACTGCATATATAAATAACATACATG	AAAAGCCAACGTCAAAAGACGTTGAAACCTTATCAGTATCTGATGAAAAA	TGTGCGAATTTTGTGTTAAAGCTGGATGATGAGAAATTATTCTCGTATTA	GTTAAAAAAAATTACAAAGAGAACTACTGCATATATAAATAACATACATGCGGATCCCCGGGTTAATTAA	AAAAGCCAACGTCAAAAGACGTTGAAACCTTATCAGTATCTGATGAAAAACGGATCCCCGGGTTAATTAA	TGTGCGAATTTTGTGTTAAAGCTGGATGATGAGAAATTATTCTCGTATTAGAATTCGAGCTCGTTTAAAC	0		0		0
YAL066W	YAL066W	1	12407	12715	+	ATGATATAATAACGTTATACGGATAACTTTATTTCAAAAGCACCATCATG	TCCAAACAAAAATGCTTGAAAAGCATACAGCTTCCGATACATCATGTATA	AGGCGAAACGGTTATACATAAATTCAAAATTTTTGTACTGTGATTTTCTA	ATGATATAATAACGTTATACGGATAACTTTATTTCAAAAGCACCATCATGCGGATCCCCGGGTTAATTAA	TCCAAACAAAAATGCTTGAAAAGCATACAGCTTCCGATACATCATGTATACGGATCCCCGGGTTAATTAA	AGGCGAAACGGTTATACATAAATTCAAAATTTTTGTACTGTGATTTTCTAGAATTCGAGCTCGTTTAAAC	0		0		0
YAL065C	YAL065C	1	13881	14267	-	CAACATGGAGGCCACAGACTACGAATGAAGAGTCTGTCAGCTCTAAAATG	ATAATGGCATAAGTGTTTTTATTTCCACCGTATTGCTGGCAATCGTATGG	CTATAAGCGTGATGATAGAATTATTAATATAAGATGATGCCGTGCGTTTA	CAACATGGAGGCCACAGACTACGAATGAAGAGTCTGTCAGCTCTAAAATGCGGATCCCCGGGTTAATTAA	ATAATGGCATAAGTGTTTTTATTTCCACCGTATTGCTGGCAATCGTATGGCGGATCCCCGGGTTAATTAA	CTATAAGCGTGATGATAGAATTATTAATATAAGATGATGCCGTGCGTTTAGAATTCGAGCTCGTTTAAAC	0		0		0
YAL064W-B	YAL064W-B	1	14362	14763	+	GATAGACCGTAACAACATCATTCACAGTAGCCGTGGCCGTCGAAACAATG	TAACGGTGGCCGTGGAAACAATCGCAGAGGAGATGGATTCAGTGCACACA	AAAACGAGCGAACAAACCACTTTGGTTACCGTGACATCCTGCGAATCTCA	GATAGACCGTAACAACATCATTCACAGTAGCCGTGGCCGTCGAAACAATGCGGATCCCCGGGTTAATTAA	TAACGGTGGCCGTGGAAACAATCGCAGAGGAGATGGATTCAGTGCACACACGGATCCCCGGGTTAATTAA	AAAACGAGCGAACAAACCACTTTGGTTACCGTGACATCCTGCGAATCTCAGAATTCGAGCTCGTTTAAAC	0		0		0
YAL064C-A	YAL064C-A	1	17968	18349	-	NNNNNNNNNNNNNNNNNNNNNNNNNNNNNNNNNNNNNNNNNNNNNNNNNN	NNNNNNNNNNNNNNNNNNNNNNNNNNNNNNNNNNNNNNNNNNNNNNNNNN	CAAGCCAGGGGATCCTCTNNNNNNNNNNNNNNNNNNNNNNNNNNNNNNNN	NNNNNNNNNNNNNNNNNNNNNNNNNNNNNNNNNNNNNNNNNNNNNNNATGCGGATCCCCGGGTTAATTAA	NNNNNNNNNNNNNNNNNNNNNNNNNNNNNNNNNNNNNNNNNNNNNNNNNNCGGATCCCCGGGTTAATTAA	CAAGCCAGGGGATCCTCTNNNNNNNNNNNNNNNNNNNNNNNNNNNNNNNNGAATTCGAGCTCGTTTAAAC	0		0		0
YAL064W	YAL064W	1	27162	27489	+	NNNNNNNNNNNNNNNNNNNNNNNNNNNNNNNNNNNNNNNNNNNNNNNNNN	NNNNNNNNNNNNNNNNNNNNNNNNNNNNNNNNNNNNNNNNNNNNNNNNNN	NNNNNNNNNNNNNNNNNNNNNNNNNNNNNNNNNNNNNNNNNNNNNNNNNN	NNNNNNNNNNNNNNNNNNNNNNNNNNNNNNNNNNNNNNNNNNNNNNNATGCGGATCCCCGGGTTAATTAA	NNNNNNNNNNNNNNNNNNNNNNNNNNNNNNNNNNNNNNNNNNNNNNNNNNCGGATCCCCGGGTTAATTAA	NNNNNNNNNNNNNNNNNNNNNNNNNNNNNNNNNNNNNNNNNNNNNNNNNNGAATTCGAGCTCGTTTAAAC	0		0		0
YAL063C-A	YAL063C-A	1	28036	28326	-	NNNNNNNNNNNNNNNNNNNNNNNNNNNNNNNNNNNNNNNNNNNNNNNNNN	NNNNNNNNNNNNNNNNNNNNNNNNNNNNNNNNNNNNNNNNNNNNNNNNNN	NNNNNNNNNNNNNNNNNNNNNNNNNNNNNNNNNNNNNNNNNNNNNNNNNN	NNNNNNNNNNNNNNNNNNNNNNNNNNNNNNNNNNNNNNNNNNNNNNNATGCGGATCCCCGGGTTAATTAA	NNNNNNNNNNNNNNNNNNNNNNNNNNNNNNNNNNNNNNNNNNNNNNNNNNCGGATCCCCGGGTTAATTAA	NNNNNNNNNNNNNNNNNNNNNNNNNNNNNNNNNNNNNNNNNNNNNNNNNNGAATTCGAGCTCGTTTAAAC	0		0		0
YAL063C	FLO9	1	29646	33047	-	TAAATTTGGAATTTAAAAGGAACAATTGTACATTAAAAGCCCCAACAATG	NNNNNNNNNNNNNNNNNNNNNNNNNNNNNNNNNNNNNNNNNNNNNNNNNN	NNNNNNNNNNNNNNNNNNNNNNNNNNNNNNNNNNNNNNNNNNNNNNNNNN	TAAATTTGGAATTTAAAAGGAACAATTGTACATTAAAAGCCCCAACAATGCGGATCCCCGGGTTAATTAA	NNNNNNNNNNNNNNNNNNNNNNNNNNNNNNNNNNNNNNNNNNNNNNNNNNCGGATCCCCGGGTTAATTAA	NNNNNNNNNNNNNNNNNNNNNNNNNNNNNNNNNNNNNNNNNNNNNNNNNNGAATTCGAGCTCGTTTAAAC	0		0		0
YAL062W	GDH3,FUN51	1	36686	38059	+	TAGGGAAGTAGCAACAGTCGCCGAAAAGAAAAGGTAAAAAGTAAAAAATG	CCAGCTTCGTCATGGTGGCTGACGCAATGCTTGACCAGGGAGACGTTTTT	ACTACATACACAGATAGTTACGAACAAAAAGAAAATAGCGTTTACGGCTA	TAGGGAAGTAGCAACAGTCGCCGAAAAGAAAAGGTAAAAAGTAAAAAATGCGGATCCCCGGGTTAATTAA	CCAGCTTCGTCATGGTGGCTGACGCAATGCTTGACCAGGGAGACGTTTTTCGGATCCCCGGGTTAATTAA	ACTACATACACAGATAGTTACGAACAAAAAGAAAATAGCGTTTACGGCTAGAATTCGAGCTCGTTTAAAC	0		0		0
YAL061W	BDH2	1	38567	39820	+	AACAACAGCAATAAGAATAACAATAAATTCATTGAACATATTTCAGAATG	ATCAAGAAAGACTACGAGAATCAATAAACGAGGCTAAACTGCGTCACACA	CAAGAAGACCGCGGGATTAACGCGAGAACGTGAGTACTCAATCACAATCA	AACAACAGCAATAAGAATAACAATAAATTCATTGAACATATTTCAGAATGCGGATCCCCGGGTTAATTAA	ATCAAGAAAGACTACGAGAATCAATAAACGAGGCTAAACTGCGTCACACACGGATCCCCGGGTTAATTAA	CAAGAAGACCGCGGGATTAACGCGAGAACGTGAGTACTCAATCACAATCAGAATTCGAGCTCGTTTAAAC	0		0		0
YAL060W	BDH1	1	40275	41423	+	GTCAGAAAAAAAAAAAAAAAAAGAACTAAAAAAAGTTTTAATTAATTATG	AATCCAACGTTAAGATTCTATTGACGCCTAACAATCACGGTGAAATGAAG	TAGATACTACAAATGAGCCGCGAGGGGCCCCAAATATCATTTTGTCATTA	GTCAGAAAAAAAAAAAAAAAAAGAACTAAAAAAAGTTTTAATTAATTATGCGGATCCCCGGGTTAATTAA	AATCCAACGTTAAGATTCTATTGACGCCTAACAATCACGGTGAAATGAAGCGGATCCCCGGGTTAATTAA	TAGATACTACAAATGAGCCGCGAGGGGCCCCAAATATCATTTTGTCATTAGAATTCGAGCTCGTTTAAAC	0		0		0
YAL059C-A	YAL059C-A	1	41614	42036	-	TTATAGTCTCATTGGTGCTATCCCAGCCAGCCTTTCTTGTATTTTGAATG	TCAAGGAAAAAACTACCTTTTGTCATCTTTGTTCCCACATTCAATACTTC	TTATTCAACTTGGCGATGAGCTGAAAATTTTTTTGGTTAAGGACCCTTTA	TTATAGTCTCATTGGTGCTATCCCAGCCAGCCTTTCTTGTATTTTGAATGCGGATCCCCGGGTTAATTAA	TCAAGGAAAAAACTACCTTTTGTCATCTTTGTTCCCACATTCAATACTTCCGGATCCCCGGGTTAATTAA	TTATTCAACTTGGCGATGAGCTGAAAATTTTTTTGGTTAAGGACCCTTTAGAATTCGAGCTCGTTTAAAC	1	YAL059W	1	YAL059W	0
YAL059W	ECM1	1	41627	42265	+	CGATGAGCTGAAAATTTTTTTGGTTAAGGACCCTTTAGAAGTATTGAATG	AGAAGACTCCTACAAATAGATTCGGTGTCCTGCCAGACGATGTTGAAGAA	TGCGTACAAGAATCGTGTATTCCTAGGACCTTTCATATGAAAATTTTCTA	CGATGAGCTGAAAATTTTTTTGGTTAAGGACCCTTTAGAAGTATTGAATGCGGATCCCCGGGTTAATTAA	AGAAGACTCCTACAAATAGATTCGGTGTCCTGCCAGACGATGTTGAAGAACGGATCCCCGGGTTAATTAA	TGCGTACAAGAATCGTGTATTCCTAGGACCTTTCATATGAAAATTTTCTAGAATTCGAGCTCGTTTAAAC	1	YAL059C-A	1	YAL059C-A	0
YAL058W	CNE1,FUN48	1	42555	44062	+	TCGTTAAGGATTGTGTAAAAAAGTGAACGGCCACACAAAGTAGTACTATG	CGGCCGTCGTGCTCTTGACGACGTCGGTTCTTTGTTGTGTAGTATTTACA	GTTGTGGTGCAATTATTGAGACCATGTTATAAACTAACACTTGTCCACTA	TCGTTAAGGATTGTGTAAAAAAGTGAACGGCCACACAAAGTAGTACTATGCGGATCCCCGGGTTAATTAA	CGGCCGTCGTGCTCTTGACGACGTCGGTTCTTTGTTGTGTAGTATTTACACGGATCCCCGGGTTAATTAA	GTTGTGGTGCAATTATTGAGACCATGTTATAAACTAACACTTGTCCACTAGAATTCGAGCTCGTTTAAAC	1	YAL056C-A	1	YAL056C-A	0
YAL056C-A	YAL056C-A	1	43786	44136	-	AGTATTATACATCATCATTTAATCATGGTGATAATATTGATACTATAATG	GCCAAGTCTTATTCCCAATAATTTGCGCCTCTGTTACATTTTTACCAACA	ATCCTCGAGTTTTGGAGTGGATCTCCAAACATGTTGATAAGCAACATTTA	AGTATTATACATCATCATTTAATCATGGTGATAATATTGATACTATAATGCGGATCCCCGGGTTAATTAA	GCCAAGTCTTATTCCCAATAATTTGCGCCTCTGTTACATTTTTACCAACACGGATCCCCGGGTTAATTAA	ATCCTCGAGTTTTGGAGTGGATCTCCAAACATGTTGATAAGCAACATTTAGAATTCGAGCTCGTTTAAAC	1	YAL058W	1	YAL058W	0
YAL056W	GPB2,KRH1	1	44349	46991	+	ATTGTGATTCATTGGCAGGTCCATTGTCGCATTACTAAATCATAGGCATG	TACATGGTACCATAACGAAAAGTATTTTTCCTAGTGTAAATCCTAGTGCA	TACTACTAAACAAAGTTTACAAAGTGAAAGCATTGAAAACTGCCTTTTTA	ATTGTGATTCATTGGCAGGTCCATTGTCGCATTACTAAATCATAGGCATGCGGATCCCCGGGTTAATTAA	TACATGGTACCATAACGAAAAGTATTTTTCCTAGTGTAAATCCTAGTGCACGGATCCCCGGGTTAATTAA	TACTACTAAACAAAGTTTACAAAGTGAAAGCATTGAAAACTGCCTTTTTAGAATTCGAGCTCGTTTAAAC	0		0		0
YAL055W	PEX22,YAF5	1	47267	47809	+	AGACAATGAAACAATAATGAAGAATAAAGAAGAAGAAGATATAAAACATG	TTGTTGTTGATAGCGATGTAGAGGATGTGCTGATTGACACTTTATGCAAT	ATAATTATTTATTCTTTACATACTGTTACAAGAAACTCTTTTCTACATTA	AGACAATGAAACAATAATGAAGAATAAAGAAGAAGAAGATATAAAACATGCGGATCCCCGGGTTAATTAA	TTGTTGTTGATAGCGATGTAGAGGATGTGCTGATTGACACTTTATGCAATCGGATCCCCGGGTTAATTAA	ATAATTATTTATTCTTTACATACTGTTACAAGAAACTCTTTTCTACATTAGAATTCGAGCTCGTTTAAAC	0		0		0
YAL054C	ACS1,FUN44	1	47971	50112	-	AAAACCAAACATATCAAAACTACTAGAAAGACATTGCCCACTGTGCTATG	CATTGTCAAACCCTGGCATTGTTAGACATCTAATTGATTCGGTCAAGTTG	ACACGAAAAAAAAAAAGTCGTCAATATAAAAAGGAAAGAAATCATCATTA	AAAACCAAACATATCAAAACTACTAGAAAGACATTGCCCACTGTGCTATGCGGATCCCCGGGTTAATTAA	CATTGTCAAACCCTGGCATTGTTAGACATCTAATTGATTCGGTCAAGTTGCGGATCCCCGGGTTAATTAA	ACACGAAAAAAAAAAAGTCGTCAATATAAAAAGGAAAGAAATCATCATTAGAATTCGAGCTCGTTTAAAC	0		0		0
YAL053W	FLC2,HUF2	1	50989	53340	+	TCTGTTTCATTACGATTATATTGACGTGATAAAAAGATTATATAGCCATG	TTAACAACAACGGCAGCAACGAAAACGCCCGCAACAACAACCCATATTTG	CCTTAAATATTTATATAATAAGTTGTTACATGTGAGTATATATTGGATTA	TCTGTTTCATTACGATTATATTGACGTGATAAAAAGATTATATAGCCATGCGGATCCCCGGGTTAATTAA	TTAACAACAACGGCAGCAACGAAAACGCCCGCAACAACAACCCATATTTGCGGATCCCCGGGTTAATTAA	CCTTAAATATTTATATAATAAGTTGTTACATGTGAGTATATATTGGATTAGAATTCGAGCTCGTTTAAAC	0		0		0
YAL051W	OAF1,YAF1	1	53654	56797	+	TATTTTGTGTTAGAAGCAGGTTAATAATAGATTAGGTTGCGTAAGTCATG	GAGGTTTGGATTTATTTGATTATGACTTTTTGTTTGGCAATGACTTTGCT	TTAATTAATTGATGAAATGAATAGGTAGGAGTTTGGAAAGAAAATTTTTA	TATTTTGTGTTAGAAGCAGGTTAATAATAGATTAGGTTGCGTAAGTCATGCGGATCCCCGGGTTAATTAA	GAGGTTTGGATTTATTTGATTATGACTTTTTGTTTGGCAATGACTTTGCTCGGATCCCCGGGTTAATTAA	TTAATTAATTGATGAAATGAATAGGTAGGAGTTTGGAAAGAAAATTTTTAGAATTCGAGCTCGTTTAAAC	0		0		0
YAL049C	YAL049C	1	56945	57685	-	GTTTTCCGCTGCGTCTAACTACAGCAGAATAAAATTATTTCAATCAAATG	AGAAAGTCTTGCTCGACCAAATATACTGGTTCAATCATTTTTCGAATGTT	TATATATATATGTATATAACGGTTAACGTAAGAAGAGCTCTTCCCTCTTA	GTTTTCCGCTGCGTCTAACTACAGCAGAATAAAATTATTTCAATCAAATGCGGATCCCCGGGTTAATTAA	AGAAAGTCTTGCTCGACCAAATATACTGGTTCAATCATTTTTCGAATGTTCGGATCCCCGGGTTAATTAA	TATATATATATGTATATAACGGTTAACGTAAGAAGAGCTCTTCCCTCTTAGAATTCGAGCTCGTTTAAAC	0		0		0
YAL048C	GEM1,GON1	1	57891	59879	-	AAAACAAAAATAGCGGACTTCTAAATACTAGTGTGTTGAACAACACAATG	TATGTTCCTTTACGTTAATGAAATTATTCAAATCATCAAAATTCTCAAAA	TATCATAGAAATGCAACACTTCCCTAATATAGAAATTTGGGCATTAATTA	AAAACAAAAATAGCGGACTTCTAAATACTAGTGTGTTGAACAACACAATGCGGATCCCCGGGTTAATTAA	TATGTTCCTTTACGTTAATGAAATTATTCAAATCATCAAAATTCTCAAAACGGATCCCCGGGTTAATTAA	TATCATAGAAATGCAACACTTCCCTAATATAGAAATTTGGGCATTAATTAGAATTCGAGCTCGTTTAAAC	1	YAL047W-A	1	YAL047W-A	0
YAL047W-A	YAL047W-A	1	59674	60003	+	ACACAAGCCAAATTACGTCGGCGGACTTCAACTCATGGTCTAAAGCTATG	AATTTCATTCTTGTTTTGAGGGTAAACCACTATACCAAATGTTGAAGATC	TAATGTAACACTCAGTCACTCTCTAGCAACATATTTGATCGATACCTTTA	ACACAAGCCAAATTACGTCGGCGGACTTCAACTCATGGTCTAAAGCTATGCGGATCCCCGGGTTAATTAA	AATTTCATTCTTGTTTTGAGGGTAAACCACTATACCAAATGTTGAAGATCCGGATCCCCGGGTTAATTAA	TAATGTAACACTCAGTCACTCTCTAGCAACATATTTGATCGATACCTTTAGAATTCGAGCTCGTTTAAAC	1	YAL048C	1	YAL048C	0
YAL047C	SPC72,LDB4	1	60079	61947	-	CACTAATATCAAAAAACTAAGCAAACAACATAAGGAAAGTTATAGCCATG	AAAATGAGTCATTGAGATCGAAACTTTTCAACCTATCAATCAACAATCCC	GTGACTGAGTGTTACATTAAATATATTTATATATAAACGTATGATATTTA	CACTAATATCAAAAAACTAAGCAAACAACATAAGGAAAGTTATAGCCATGCGGATCCCCGGGTTAATTAA	AAAATGAGTCATTGAGATCGAAACTTTTCAACCTATCAATCAACAATCCCCGGATCCCCGGGTTAATTAA	GTGACTGAGTGTTACATTAAATATATTTATATATAAACGTATGATATTTAGAATTCGAGCTCGTTTAAAC	0		0		0
YAL046C	YAL046C	1	62119	62475	-	TGGTCACTGAGAACCATAAAAGCGAAAAGAGAAGGTAAAACATAGAAATG	GCCTACAATTGACCACTAAGAAGTCAACTGGGAAGGGTCCGGCATCATCA	GTAAACTAAAAGTGATACTTACACGAGCTTTTTTGGTTCCAAACTGTTCA	TGGTCACTGAGAACCATAAAAGCGAAAAGAGAAGGTAAAACATAGAAATGCGGATCCCCGGGTTAATTAA	GCCTACAATTGACCACTAAGAAGTCAACTGGGAAGGGTCCGGCATCATCACGGATCCCCGGGTTAATTAA	GTAAACTAAAAGTGATACTTACACGAGCTTTTTTGGTTCCAAACTGTTCAGAATTCGAGCTCGTTTAAAC	0		0		0
YAL045C	YAL045C	1	62578	62886	-	GCTTTGGATTCATACTCCTGTGGGGTCTTTAGTGACAATTGTAAAGCATG	GTGCTCATTGCTCTCTTGAACATTATTCTCTTTCCACTTTCGTTTGCTGC	AACTTATATATGTTCCGGAATGACGAATCAAAAAGAGAATAGCATCGTTA	GCTTTGGATTCATACTCCTGTGGGGTCTTTAGTGACAATTGTAAAGCATGCGGATCCCCGGGTTAATTAA	GTGCTCATTGCTCTCTTGAACATTATTCTCTTTCCACTTTCGTTTGCTGCCGGATCCCCGGGTTAATTAA	AACTTATATATGTTCCGGAATGACGAATCAAAAAGAGAATAGCATCGTTAGAATTCGAGCTCGTTTAAAC	1	YAL044W-A	1	YAL044W-A	0
YAL044W-A	YAL044W-A	1	62608	62940	+	AAAAGAGAATAGCATCGTTAGCAGCAAACGAAAGTGGAAAGAGAATAATG	CTTTACAATTGTCACTAAAGACCCCACAGGAGTATGAATCCAAAGCGAAA	GGGAAATAAAACAATAAACTCAACGTGTACACTTATGCTTATGCATTCTA	AAAAGAGAATAGCATCGTTAGCAGCAAACGAAAGTGGAAAGAGAATAATGCGGATCCCCGGGTTAATTAA	CTTTACAATTGTCACTAAAGACCCCACAGGAGTATGAATCCAAAGCGAAACGGATCCCCGGGTTAATTAA	GGGAAATAAAACAATAAACTCAACGTGTACACTTATGCTTATGCATTCTAGAATTCGAGCTCGTTTAAAC	1	YAL045C	1	YAL045C	0
YAL044C	GCV3	1	63040	63552	-	TATCTAATGGGAAAGGGAATCTACACATGAAGCATACCACATCGACAATG	AGGGTCTAATGTCCTTAGAACAGTACGAAAAGACACTGGTTCATGATGAC	TATATATACATATATATGAAATTACTTTACGTACGTATAAGCTTTGTTCA	TATCTAATGGGAAAGGGAATCTACACATGAAGCATACCACATCGACAATGCGGATCCCCGGGTTAATTAA	AGGGTCTAATGTCCTTAGAACAGTACGAAAAGACACTGGTTCATGATGACCGGATCCCCGGGTTAATTAA	TATATATACATATATATGAAATTACTTTACGTACGTATAAGCTTTGTTCAGAATTCGAGCTCGTTTAAAC	0		0		0
YAL043C	PTA1,FUN39	1	63785	66142	-	ATGGTTAAATCGTGGCAAGAAGCATATAACTACCACTAAGCAGCGCAATG	AAGATGAAGGCTTACACAAGCAGTGCGATTCACTGCTTGACAGGCTAAAA	AGGAAGACCCTACACATGCGTATATATGATGTATGTAATGGTTGTGATCA	ATGGTTAAATCGTGGCAAGAAGCATATAACTACCACTAAGCAGCGCAATGCGGATCCCCGGGTTAATTAA	AAGATGAAGGCTTACACAAGCAGTGCGATTCACTGCTTGACAGGCTAAAACGGATCCCCGGGTTAATTAA	AGGAAGACCCTACACATGCGTATATATGATGTATGTAATGGTTGTGATCAGAATTCGAGCTCGTTTAAAC	0		0		0
YAL042C-A	YAL042C-A	1	66321	66698	-	GGCGACCCTCGCTATTCAACCTAGACATCGTGAACCCTGCGTCAAGAATG	TCACTGTCCTACTCCGCATGTATACGAGACATAAAACTAGCTTTCCTTTA	ACATCAGAACGGCGATTTTCCATCAAGATGGAGTGGAAACCACGCCATTA	GGCGACCCTCGCTATTCAACCTAGACATCGTGAACCCTGCGTCAAGAATGCGGATCCCCGGGTTAATTAA	TCACTGTCCTACTCCGCATGTATACGAGACATAAAACTAGCTTTCCTTTACGGATCCCCGGGTTAATTAA	ACATCAGAACGGCGATTTTCCATCAAGATGGAGTGGAAACCACGCCATTAGAATTCGAGCTCGTTTAAAC	1	YAL042W	1	YAL042W	0
YAL042W	ERV46,FUN9	1	66406	67653	+	GGAGTAGGACAGTGATATAACACACATAGCTAGACACAATAGACATCATG	ACAAGCTATTCTACAAAGCACAGAGATCGATCTGGGGCAAGAAGAGCCAG	ATGTAGTAGTATGTAGAAAGGGCTCTTCCCTATGACAGTCTCTTCTTCTA	GGAGTAGGACAGTGATATAACACACATAGCTAGACACAATAGACATCATGCGGATCCCCGGGTTAATTAA	ACAAGCTATTCTACAAAGCACAGAGATCGATCTGGGGCAAGAAGAGCCAGCGGATCCCCGGGTTAATTAA	ATGTAGTAGTATGTAGAAAGGGCTCTTCCCTATGACAGTCTCTTCTTCTAGAATTCGAGCTCGTTTAAAC	1	YAL042C-A	1	YAL042C-A	0
YAL041W	CDC24,CLS4	1	67928	70492	+	TTGCCTAGCCCTATCAAGACCTGTCTGCTAATCCAACCCGAGAGATCATG	AAGAAATGTTGGCAGAAAACAATGAGAAATTCTTGAACATTCGTCTGTAT	TTTTTTTCTTGAATTATTTAGTATTTGCTGTATACTAGTTTTATTTATCA	TTGCCTAGCCCTATCAAGACCTGTCTGCTAATCCAACCCGAGAGATCATGCGGATCCCCGGGTTAATTAA	AAGAAATGTTGGCAGAAAACAATGAGAAATTCTTGAACATTCGTCTGTATCGGATCCCCGGGTTAATTAA	TTTTTTTCTTGAATTATTTAGTATTTGCTGTATACTAGTTTTATTTATCAGAATTCGAGCTCGTTTAAAC	0		0		0
YAL040C	CLN3,WHI1,FUN10,DAF1	1	70866	72608	-	CCCTTTTACTCTCGTTCAAGACACTGATTTGATACGCTTTCTGTACGATG	CCTCTGTGGATTGTGATTTTAATGATAGTAGCAACCTCAAGAAAACTCGC	TGCAAATTTTAATTTATTTGTTGTTAAATGCATTTTTCTTTGTCGTTTCA	CCCTTTTACTCTCGTTCAAGACACTGATTTGATACGCTTTCTGTACGATGCGGATCCCCGGGTTAATTAA	CCTCTGTGGATTGTGATTTTAATGATAGTAGCAACCTCAAGAAAACTCGCCGGATCCCCGGGTTAATTAA	TGCAAATTTTAATTTATTTGTTGTTAAATGCATTTTTCTTTGTCGTTTCAGAATTCGAGCTCGTTTAAAC	0		0		0
YAL039C	CYC3	1	73803	74612	-	CGAGTAGCACGAATAAAACAGAGCAAATACAACAGAAACTACAAAAGATG	GTTTCTTGGACCGGATGATCTCGGGTCCGCCCTCTTCGTCCTCGGCCCCT	ATTTCTTACTTGGCTATTTACACGTACTTACGCTGGCTGTATATCATTTA	CGAGTAGCACGAATAAAACAGAGCAAATACAACAGAAACTACAAAAGATGCGGATCCCCGGGTTAATTAA	GTTTCTTGGACCGGATGATCTCGGGTCCGCCCTCTTCGTCCTCGGCCCCTCGGATCCCCGGGTTAATTAA	ATTTCTTACTTGGCTATTTACACGTACTTACGCTGGCTGTATATCATTTAGAATTCGAGCTCGTTTAAAC	0		0		0
YAL038W	CDC19,PYK1	1	76840	78342	+	GTTTCTATTTACAAGACACCAATCAAAACAAATAAAACATCATTACAATG	GTTTCAAGGCCGGTGCTGGTCACTCCAACACTTTGCAAGTCTCTACCGTT	AATATAATTCAAAAAAATAATATCTTCATTCAATCATGATTCTTTTTTTA	GTTTCTATTTACAAGACACCAATCAAAACAAATAAAACATCATTACAATGCGGATCCCCGGGTTAATTAA	GTTTCAAGGCCGGTGCTGGTCACTCCAACACTTTGCAAGTCTCTACCGTTCGGATCCCCGGGTTAATTAA	AATATAATTCAAAAAAATAATATCTTCATTCAATCATGATTCTTTTTTTAGAATTCGAGCTCGTTTAAAC	1	YAL037C-B	1	YAL037C-B	0
YAL037C-B	YAL037C-B	1	77380	78354	-	TAAAATTTAAAAAATATAATTCAAAAAAATAATATCTTCATTCAATCATG	TCTTCCTTGTCCTTTTCAGACAAAGCTGGCAAATCGACATCGGTACCTGG	TCAAGGCTTTGAACGCCGGTAAGATCTGTTCCCACAAGGGTGTCAACTTA	TAAAATTTAAAAAATATAATTCAAAAAAATAATATCTTCATTCAATCATGCGGATCCCCGGGTTAATTAA	TCTTCCTTGTCCTTTTCAGACAAAGCTGGCAAATCGACATCGGTACCTGGCGGATCCCCGGGTTAATTAA	TCAAGGCTTTGAACGCCGGTAAGATCTGTTCCCACAAGGGTGTCAACTTAGAATTCGAGCTCGTTTAAAC	1	YAL038W	1	YAL038W	0
YAL037C-A	YAL037C-A	1	78480	78572	-	AGATTATCTTGCGATGGGAGGGAACAAATTTAGCAAGTTTTGACTCTATG	CGACGACAATTGGAGACAAAAAGGTTAACAATAACATAATACTCTTTTTA	ATAAAGATTTATAAGTTACTTAAATAACATACATTTTATAAGGTATTCTA	AGATTATCTTGCGATGGGAGGGAACAAATTTAGCAAGTTTTGACTCTATGCGGATCCCCGGGTTAATTAA	CGACGACAATTGGAGACAAAAAGGTTAACAATAACATAATACTCTTTTTACGGATCCCCGGGTTAATTAA	ATAAAGATTTATAAGTTACTTAAATAACATACATTTTATAAGGTATTCTAGAATTCGAGCTCGTTTAAAC	0		0		0
YAL037W	YAL037W	1	79074	79877	+	GACATAGTGCCAATAATTACGCAAAAAGCAAAGGAAATAACACTGCTATG	CTACGATCGATAACAGAATACTTATGGGTACCACAAAGCGAGGTCGCTTT	AAAAAAACAGTCGTAATAATTAAAAATATTATGCTACCGAGGGCCCTTCA	GACATAGTGCCAATAATTACGCAAAAAGCAAAGGAAATAACACTGCTATGCGGATCCCCGGGTTAATTAA	CTACGATCGATAACAGAATACTTATGGGTACCACAAAGCGAGGTCGCTTTCGGATCCCCGGGTTAATTAA	AAAAAAACAGTCGTAATAATTAAAAATATTATGCTACCGAGGGCCCTTCAGAATTCGAGCTCGTTTAAAC	0		0		0
YAL036C	RBG1,FUN11	1	80093	81202	-	GAAGCTAGATGCAGTAGGTGCAAGCGTAGAGTTGTTGATTGAGCAAAATG	GGTTGAGTCACATTTTGGAAGACGAAGATGTTGTTACCATCTTGAAAAAG	TAAATTATTTTTTTTTTTCATTTCTTATATTATTTTTTGTTCGAGAATCA	GAAGCTAGATGCAGTAGGTGCAAGCGTAGAGTTGTTGATTGAGCAAAATGCGGATCCCCGGGTTAATTAA	GGTTGAGTCACATTTTGGAAGACGAAGATGTTGTTACCATCTTGAAAAAGCGGATCCCCGGGTTAATTAA	TAAATTATTTTTTTTTTTCATTTCTTATATTATTTTTTGTTCGAGAATCAGAATTCGAGCTCGTTTAAAC	0		0		0
YAL035W	FUN12,yIF2	1	81477	84476	+	CTTTGAGGGGATAAGAAGGGCAATCAGGAACATCAGACAAGTGAAAGATG	GATCCGATTGGCTGCTATTGAAGAAGCTGAAGGTCGTTTTCGGCATCGAA	AAATTTTGTAGAATGTGATTGGGTTGACAAGTCGGCGTATGCCATGCTCA	CTTTGAGGGGATAAGAAGGGCAATCAGGAACATCAGACAAGTGAAAGATGCGGATCCCCGGGTTAATTAA	GATCCGATTGGCTGCTATTGAAGAAGCTGAAGGTCGTTTTCGGCATCGAACGGATCCCCGGGTTAATTAA	AAATTTTGTAGAATGTGATTGGGTTGACAAGTCGGCGTATGCCATGCTCAGAATTCGAGCTCGTTTAAAC	0		0		0
YAL034C-B	YAL034C-B	1	84530	84884	-	CATAATCTTCCTCGCCGATTTTGCTCTTGGATAGCAGATATTTTTCCATG	AATTGAAACTAATACACAAAGGTTCACATTTTTATATACAATTACCTATT	CATACGCCGACTTGTCAACCCAATCACATTCTACAAAATTTAATGAATTA	CATAATCTTCCTCGCCGATTTTGCTCTTGGATAGCAGATATTTTTCCATGCGGATCCCCGGGTTAATTAA	AATTGAAACTAATACACAAAGGTTCACATTTTTATATACAATTACCTATTCGGATCCCCGGGTTAATTAA	CATACGCCGACTTGTCAACCCAATCACATTCTACAAAATTTAATGAATTAGAATTCGAGCTCGTTTAAAC	1	YAL034W-A	1	YAL034W-A	0
YAL034W-A	MTW1,NSL2,DSN3	1	84760	85629	+	GTTGAGTAAGAACACGTTGAAACTGGGTTAAGACGATCAAAACAACCATG	TTAGTATAGATATTGAAGAACCTCAATTGGATTTACTTGATGATGTGTTA	GTGAATACATACATCATATCATAGCACATACTTTTTCCCACTTTATATTA	GTTGAGTAAGAACACGTTGAAACTGGGTTAAGACGATCAAAACAACCATGCGGATCCCCGGGTTAATTAA	TTAGTATAGATATTGAAGAACCTCAATTGGATTTACTTGATGATGTGTTACGGATCCCCGGGTTAATTAA	GTGAATACATACATCATATCATAGCACATACTTTTTCCCACTTTATATTAGAATTCGAGCTCGTTTAAAC	1	YAL034C-B	1	YAL034C-B	0
YAL034C	FUN19	1	85753	86994	-	CATCGATAAACAGGATATTCGCGCATCGTAACATTTATAGGGGAAACATG	CTTTCGAGAAGGTTGGCTGGCTACAGGATTCGAATTTTACGAAGTACTTA	AATTGGATAAAAGAAAACCATGTTTAAAATGCATACCACCATGTGTATTA	CATCGATAAACAGGATATTCGCGCATCGTAACATTTATAGGGGAAACATGCGGATCCCCGGGTTAATTAA	CTTTCGAGAAGGTTGGCTGGCTACAGGATTCGAATTTTACGAAGTACTTACGGATCCCCGGGTTAATTAA	AATTGGATAAAAGAAAACCATGTTTAAAATGCATACCACCATGTGTATTAGAATTCGAGCTCGTTTAAAC	0		0		0
YAL033W	POP5,FUN53	1	87749	88270	+	ATTGATGTGATAGCAATAGTTAGTGCAACAAAGAAACAAGTCGATAAATG	ATGATTTCAAGAAAATTGGAAGGGAAAACGAAAACGAAAACGAGGACGAT	AAAATAAAACTACTGCATATACGTGTACATCTATATATTAATATATTCTA	ATTGATGTGATAGCAATAGTTAGTGCAACAAAGAAACAAGTCGATAAATGCGGATCCCCGGGTTAATTAA	ATGATTTCAAGAAAATTGGAAGGGAAAACGAAAACGAAAACGAGGACGATCGGATCCCCGGGTTAATTAA	AAAATAAAACTACTGCATATACGTGTACATCTATATATTAATATATTCTAGAATTCGAGCTCGTTTAAAC	0		0		0
YAL032C	PRP45,FUN20	1	88378	89516	-	CATGGCAGCTCTGAGCCGAGAGGACGTATCAGCAACCTCAACCAAATATG	TTCAGTTTACTAAAGCTGAATCCGATGATAAATCGGATAACTATGGCGCC	CAACTCAAGCACAAGAATGCTTTGTTTTCCTAGTGCTCATCCTGGGCCTG	CATGGCAGCTCTGAGCCGAGAGGACGTATCAGCAACCTCAACCAAATATGCGGATCCCCGGGTTAATTAA	TTCAGTTTACTAAAGCTGAATCCGATGATAAATCGGATAACTATGGCGCCCGGATCCCCGGGTTAATTAA	CAACTCAAGCACAAGAATGCTTTGTTTTCCTAGTGCTCATCCTGGGCCTGGAATTCGAGCTCGTTTAAAC	0		0		0
YAL031W-A	YAL031W-A	1	89711	90018	+	AATATTAAAAAATAGTATGAGTACTTTTGAATCATCAGACAAGAACAATG	TGGACTTATGCTGTAGCGGCTTGATCATTGCCGAAGCAGGTATTGGCGGA	CCTAAACCAACAAAGGTGGGTTGGTACAAGAAGCCGGCTGTGCTACATTA	AATATTAAAAAATAGTATGAGTACTTTTGAATCATCAGACAAGAACAATGCGGATCCCCGGGTTAATTAA	TGGACTTATGCTGTAGCGGCTTGATCATTGCCGAAGCAGGTATTGGCGGACGGATCCCCGGGTTAATTAA	CCTAAACCAACAAAGGTGGGTTGGTACAAGAAGCCGGCTGTGCTACATTAGAATTCGAGCTCGTTTAAAC	1	YAL031C	1	YAL031C	0
YAL031C	GIP4,FUN21	1	89790	92072	-	GATTGGAAGCTGAAGGTTGAGGATTTAGACTAGTTTTATATTACAACATG	AAGAGTCGACCGGGCATAGAATAGCTTCTAAAATCAGAAGCAAATTGAGA	CTTTTTTTTTCCAGGGACATAAAGAGTTGTTTTTATAAGGTGCGGAGTTA	GATTGGAAGCTGAAGGTTGAGGATTTAGACTAGTTTTATATTACAACATGCGGATCCCCGGGTTAATTAA	AAGAGTCGACCGGGCATAGAATAGCTTCTAAAATCAGAAGCAAATTGAGACGGATCCCCGGGTTAATTAA	CTTTTTTTTTCCAGGGACATAAAGAGTTGTTTTTATAAGGTGCGGAGTTAGAATTCGAGCTCGTTTAAAC	1	YAL031W-A	1	YAL031W-A	0
YAL030W	SNC1	1	92327	92793	+	TGAAAATTTGCGCCAAAGACATAGCAAGCGCAACGTATTCATTGTCCATG	TCATATTGCTTGTTGTAATCATCGTCCCCATTGCTGTTCACTTTAGTCGA	CACTACATATGGAAGCTCCCTATATATATAGCATTGCGAGTGAACTTCTA	TGAAAATTTGCGCCAAAGACATAGCAAGCGCAACGTATTCATTGTCCATGCGGATCCCCGGGTTAATTAA	TCATATTGCTTGTTGTAATCATCGTCCCCATTGCTGTTCACTTTAGTCGACGGATCCCCGGGTTAATTAA	CACTACATATGGAAGCTCCCTATATATATAGCATTGCGAGTGAACTTCTAGAATTCGAGCTCGTTTAAAC	0		0		0
YAL029C	MYO4,SHE1,FUN22	1	92896	97311	-	TCTAAAAAACAAAAAAACAAAAAAAATCCTATAACCAGTTCTCCCGCATG	ATACAGAGGGCTTAGCTACTGTCAGTAAAATTATAAAATTAGACAGAACA	ATGTATATATACATATATACATATATGGGCGTATATTTACTTTGTTCTTA	TCTAAAAAACAAAAAAACAAAAAAAATCCTATAACCAGTTCTCCCGCATGCGGATCCCCGGGTTAATTAA	ATACAGAGGGCTTAGCTACTGTCAGTAAAATTATAAAATTAGACAGAACACGGATCCCCGGGTTAATTAA	ATGTATATATACATATATACATATATGGGCGTATATTTACTTTGTTCTTAGAATTCGAGCTCGTTTAAAC	0		0		0
YAL028W	FRT2,HPH2	1	97940	99526	+	CAAATTGATGGCAGTTTTTTACGTAGTCCAGTAGTTGTTCAGGTACAATG	TTATCATCATCGTCATATGCTATACCTTCAAGCATCTAATATCGCATAAA	ATATGAAAAAATCACAGGATCATTTTTTGATATACAAGTACTATTTTTTA	CAAATTGATGGCAGTTTTTTACGTAGTCCAGTAGTTGTTCAGGTACAATGCGGATCCCCGGGTTAATTAA	TTATCATCATCGTCATATGCTATACCTTCAAGCATCTAATATCGCATAAACGGATCCCCGGGTTAATTAA	ATATGAAAAAATCACAGGATCATTTTTTGATATACAAGTACTATTTTTTAGAATTCGAGCTCGTTTAAAC	0		0		0
YAL027W	YAL027W	1	99727	100512	+	GAATACAAGAAGATTGAGTATATTGGACTTCACAGTAACCGTGAAAAATG	GGCCTAGAAGACATAAGGTACGTACCCAATCGAAGCAACCCCAGGAGGAA	GTTATATAGAAGTTATAATATTAAGCCATCACTTTGTTATCGGTTTTTCA	GAATACAAGAAGATTGAGTATATTGGACTTCACAGTAACCGTGAAAAATGCGGATCCCCGGGTTAATTAA	GGCCTAGAAGACATAAGGTACGTACCCAATCGAAGCAACCCCAGGAGGAACGGATCCCCGGGTTAATTAA	GTTATATAGAAGTTATAATATTAAGCCATCACTTTGTTATCGGTTTTTCAGAATTCGAGCTCGTTTAAAC	1	YAL026C-A	1	YAL026C-A	0
YAL026C-A	YAL026C-A	1	100426	100862	-	CTTTTCACAGGCTGAAGAGGGTGGGCAAGAAAAAATTGTCAGAATGTATG	ACCTTATGTCTTCTAGGCCTATGCAAGACATGTACATCAATAATTTCGCC	AGGATATAAAACCTGTAATAGAATTTATGTACAAACCCGTTATTAATTTG	CTTTTCACAGGCTGAAGAGGGTGGGCAAGAAAAAATTGTCAGAATGTATGCGGATCCCCGGGTTAATTAA	ACCTTATGTCTTCTAGGCCTATGCAAGACATGTACATCAATAATTTCGCCCGGATCCCCGGGTTAATTAA	AGGATATAAAACCTGTAATAGAATTTATGTACAAACCCGTTATTAATTTGGAATTCGAGCTCGTTTAAAC	2	YAL027W;YAL026C	2	YAL027W;YAL026C	0
YAL026C	DRS2,SWA3,FUN38	1	100669	104736	-	GCCAAGCAATAATTTACTGGTAGGTTCTTTCATTCCCTGATTTTACCATG	AAAATTCAAATAGATTCAGTTCTTCGAGAGATGATATTTCATTTGATATA	TTATTTTTATTTTATATTTTTTGTCTTCTGCTCTTTGTTTCTGTGCCTCA	GCCAAGCAATAATTTACTGGTAGGTTCTTTCATTCCCTGATTTTACCATGCGGATCCCCGGGTTAATTAA	AAAATTCAAATAGATTCAGTTCTTCGAGAGATGATATTTCATTTGATATACGGATCCCCGGGTTAATTAA	TTATTTTTATTTTATATTTTTTGTCTTCTGCTCTTTGTTTCTGTGCCTCAGAATTCGAGCTCGTTTAAAC	1	YAL026C-A	1	YAL026C-A	1	HRA1
YAL025C	MAK16	1	105262	106182	-	GTGTTCTCTTCAGTAGATAACTACAACGGTTAGAATACAACGAGGATATG	AATACGAGGAGGAACACGAAGTTCAAAATGCTGAGCAAGAAGTGGCACAA	TAATAGAAACTGAAATCATGTAATGTTGCGTAGTATAGTGCGTGAGCTTA	GTGTTCTCTTCAGTAGATAACTACAACGGTTAGAATACAACGAGGATATGCGGATCCCCGGGTTAATTAA	AATACGAGGAGGAACACGAAGTTCAAAATGCTGAGCAAGAAGTGGCACAACGGATCCCCGGGTTAATTAA	TAATAGAAACTGAAATCATGTAATGTTGCGTAGTATAGTGCGTGAGCTTAGAATTCGAGCTCGTTTAAAC	0		0		0
YAL024C	LTE1,MSI2	1	106597	110904	-	TTGCTTTACATAGCCTCTAGCCATTCAAAGATTCGCTACCCTGAACCATG	GTGTTTATATCAGCACATTAACACAAGAAGAGATTAATGAACTATCCACA	TTTTTTACAAGAGGAATTTGGGAACTGGAGGAAAGTGGCACAATATCTCA	TTGCTTTACATAGCCTCTAGCCATTCAAAGATTCGCTACCCTGAACCATGCGGATCCCCGGGTTAATTAA	GTGTTTATATCAGCACATTAACACAAGAAGAGATTAATGAACTATCCACACGGATCCCCGGGTTAATTAA	TTTTTTACAAGAGGAATTTGGGAACTGGAGGAAAGTGGCACAATATCTCAGAATTCGAGCTCGTTTAAAC	0		0		0
YAL023C	PMT2,FUN25	1	111304	113583	-	GTCCACATCGCTACTGTCATTCTGTTTCGAACCGTGGTCCAGCAATCATG	GCTACTTAAACTGGTTTTCCACTTGGGACATTGCCGACAAGCAAGAAGCA	ATTTAATTCTTGTTTTTTACTTATGTACTTACTACGATGATCTTAATTCA	GTCCACATCGCTACTGTCATTCTGTTTCGAACCGTGGTCCAGCAATCATGCGGATCCCCGGGTTAATTAA	GCTACTTAAACTGGTTTTCCACTTGGGACATTGCCGACAAGCAAGAAGCACGGATCCCCGGGTTAATTAA	ATTTAATTCTTGTTTTTTACTTATGTACTTACTACGATGATCTTAATTCAGAATTCGAGCTCGTTTAAAC	0		0		0
YAL022C	FUN26	1	113909	115462	-	GGCGACAGCTTATCATCAAACGCAAGAAAGCATACCAGATTGCAAAAATG	GCAGCATCATAAGCTACGTATTCGTCTTCATAATTGACTTTATTATCAGG	CGTATCACGACTGTAAATGATGGCGTTTCGGTATGTACAGTATCTATCTA	GGCGACAGCTTATCATCAAACGCAAGAAAGCATACCAGATTGCAAAAATGCGGATCCCCGGGTTAATTAA	GCAGCATCATAAGCTACGTATTCGTCTTCATAATTGACTTTATTATCAGGCGGATCCCCGGGTTAATTAA	CGTATCACGACTGTAAATGATGGCGTTTCGGTATGTACAGTATCTATCTAGAATTCGAGCTCGTTTAAAC	0		0		0
YAL021C	CCR4,NUT21,FUN27	1	115871	118387	-	ACCAGCAAGGGAACTCCGACTGACGTTATCCCTGCAAACTACCGCTAATG	TGTTAGCAAGATTTGAATTTATGAAGACAAACACAGGCAGTAGGAAAGTA	AGGTAGTGTACAGAGAGGAGGGAGGGAGTGGGATGAAAGTGTGCGGTTTA	ACCAGCAAGGGAACTCCGACTGACGTTATCCCTGCAAACTACCGCTAATGCGGATCCCCGGGTTAATTAA	TGTTAGCAAGATTTGAATTTATGAAGACAAACACAGGCAGTAGGAAAGTACGGATCCCCGGGTTAATTAA	AGGTAGTGTACAGAGAGGAGGGAGGGAGTGGGATGAAAGTGTGCGGTTTAGAATTCGAGCTCGTTTAAAC	0		0		0
YAL020C	ATS1,KTI13,FUN28	1	118642	119643	-	GCAAGTGATGAAATGTGATCATTAAAGGCTATAAAAGGCTTGTATCGATG	CTGGAAAACCTCGCGTGTTTGGCGGATGTGCCACCACGTGGATCGTGCTC	ATGGACATCTATGTATATGATAGTGGGTATATAGTTACTTATCAGTGCTA	GCAAGTGATGAAATGTGATCATTAAAGGCTATAAAAGGCTTGTATCGATGCGGATCCCCGGGTTAATTAA	CTGGAAAACCTCGCGTGTTTGGCGGATGTGCCACCACGTGGATCGTGCTCCGGATCCCCGGGTTAATTAA	ATGGACATCTATGTATATGATAGTGGGTATATAGTTACTTATCAGTGCTAGAATTCGAGCTCGTTTAAAC	1	YAL019W-A	1	YAL019W-A	0
YAL019W-A	YAL019W-A	1	119278	119847	+	AAACATCCGTATACTGCGATGCGCCCATCGTTGGAATTCAATGGCACATG	GCCCATCTCGCAATGCAACACGTAACTTAAATCAGTACTGGCGTGTGCTA	TAGATAGTCGGGTGTCCACCAGTAGCAACAAACTCGAATATAAAGCACTA	AAACATCCGTATACTGCGATGCGCCCATCGTTGGAATTCAATGGCACATGCGGATCCCCGGGTTAATTAA	GCCCATCTCGCAATGCAACACGTAACTTAAATCAGTACTGGCGTGTGCTACGGATCCCCGGGTTAATTAA	TAGATAGTCGGGTGTCCACCAGTAGCAACAAACTCGAATATAAAGCACTAGAATTCGAGCTCGTTTAAAC	1	YAL020C	1	YAL020C	0
YAL019W	FUN30	1	119947	123333	+	AGGAACGTAAACGAGAAAAAGAGAGAAAATACGCTATAGTTGAAAACATG	TGGAGGATATAATTTATGATGAAAACTCGAAACCGAAGGGAACCAAAGAA	TTTATTTTCTGCTTATCTATTTACTTTTTTACTATATTTTTATTTATTTA	AGGAACGTAAACGAGAAAAAGAGAGAAAATACGCTATAGTTGAAAACATGCGGATCCCCGGGTTAATTAA	TGGAGGATATAATTTATGATGAAAACTCGAAACCGAAGGGAACCAAAGAACGGATCCCCGGGTTAATTAA	TTTATTTTCTGCTTATCTATTTACTTTTTTACTATATTTTTATTTATTTAGAATTCGAGCTCGTTTAAAC	0		0		0
YAL018C	YAL018C	1	123584	124561	-	GTGTAGGGAACAAAGGTACATTATACAAACAATAACAACAACAGGAAATG	AAGCTGAAATCGAAGCAGCACCACAAGATATCAATCAACAACCGAATCAA	GCTAGGTAATTTTAATCTGGGGAGAGAAATGGTGAACTTTTTTCAATTTA	GTGTAGGGAACAAAGGTACATTATACAAACAATAACAACAACAGGAAATGCGGATCCCCGGGTTAATTAA	AAGCTGAAATCGAAGCAGCACCACAAGATATCAATCAACAACCGAATCAACGGATCCCCGGGTTAATTAA	GCTAGGTAATTTTAATCTGGGGAGAGAAATGGTGAACTTTTTTCAATTTAGAATTCGAGCTCGTTTAAAC	0		0		0
YAL017W	PSK1,FUN31	1	125241	129311	+	GTTTTGTTCTCTCCCTAATTTGCATATAGGTAAACATCAAAGAAGTAATG	CGAAGAGACCCACCATTGACGACATAAATAACGACAAATGGTTGGTTATT	GCATTTTCTTTTCCAATTACTAATGTCCTAGAATGATCATTAATCCTTCA	GTTTTGTTCTCTCCCTAATTTGCATATAGGTAAACATCAAAGAAGTAATGCGGATCCCCGGGTTAATTAA	CGAAGAGACCCACCATTGACGACATAAATAACGACAAATGGTTGGTTATTCGGATCCCCGGGTTAATTAA	GCATTTTCTTTTCCAATTACTAATGTCCTAGAATGATCATTAATCCTTCAGAATTCGAGCTCGTTTAAAC	0		0		0
YAL016C-B	YAL016C-B	1	129323	129508	-	ATAAATATGTAAATTTTTTATATTTAAGTCTTGATTAACTGCTTTGGATG	CTACTGGATATTTTTTTGCATTTTCTTTTCCAATTACTAATGTCCTAGAA	GACGACATAAATAACGACAAATGGTTGGTTATTTGAAGGATTAATGATCA	ATAAATATGTAAATTTTTTATATTTAAGTCTTGATTAACTGCTTTGGATGCGGATCCCCGGGTTAATTAA	CTACTGGATATTTTTTTGCATTTTCTTTTCCAATTACTAATGTCCTAGAACGGATCCCCGGGTTAATTAA	GACGACATAAATAACGACAAATGGTTGGTTATTTGAAGGATTAATGATCAGAATTCGAGCTCGTTTAAAC	0		0		0
YAL016C-A	YAL016C-A	1	129771	130085	-	AGGGAATCAACTCGTTTCTTGTTCTTTCGGGACCGAGTGCCAACGCGATG	GTTCCACGTTAGTATTGTTGCTATCTGCCTTCCTTCGTAACTTAGTTCCC	TTTTGCAGGGACAGCGAAAAAGGTGAAAGAGTTAACAGGAGAAAGTGTTA	AGGGAATCAACTCGTTTCTTGTTCTTTCGGGACCGAGTGCCAACGCGATGCGGATCCCCGGGTTAATTAA	GTTCCACGTTAGTATTGTTGCTATCTGCCTTCCTTCGTAACTTAGTTCCCCGGATCCCCGGGTTAATTAA	TTTTGCAGGGACAGCGAAAAAGGTGAAAGAGTTAACAGGAGAAAGTGTTAGAATTCGAGCTCGTTTAAAC	1	YAL016W	1	YAL016W	0
YAL016W	TPD3,FUN32	1	129895	131802	+	GTATCTGATTATCGAAGAATAATTGAGTGGTCAGAAAGGAACGAAATATG	AATACTTCGCTAAGAAAAGTTTGGCAGAATGTCAAGAACTTTTAAAAAAT	TCATTCAAGTGTACATATGTGTATGTATGTATATATTTGAACTAGTATCA	GTATCTGATTATCGAAGAATAATTGAGTGGTCAGAAAGGAACGAAATATGCGGATCCCCGGGTTAATTAA	AATACTTCGCTAAGAAAAGTTTGGCAGAATGTCAAGAACTTTTAAAAAATCGGATCCCCGGGTTAATTAA	TCATTCAAGTGTACATATGTGTATGTATGTATATATTTGAACTAGTATCAGAATTCGAGCTCGTTTAAAC	1	YAL016C-A	1	YAL016C-A	0
YAL015C	NTG1,SCR1,FUN33	1	131919	133118	-	CATATATTTGTATTTATATATACTTTATAGCCCAAAAAAAAAAAAATATG	AAGAAACTATGGTCAAACTGGAAAATGATATTTCTGTTAAAGTAGAGGAC	ACTAGGCCTGCTTTCTTTTCTTTTTTTTTTTTTTTTTTTTATCACAGTTA	CATATATTTGTATTTATATATACTTTATAGCCCAAAAAAAAAAAAATATGCGGATCCCCGGGTTAATTAA	AAGAAACTATGGTCAAACTGGAAAATGATATTTCTGTTAAAGTAGAGGACCGGATCCCCGGGTTAATTAA	ACTAGGCCTGCTTTCTTTTCTTTTTTTTTTTTTTTTTTTTATCACAGTTAGAATTCGAGCTCGTTTAAAC	0		0		0
YAL014C	SYN8,SLT2,UIP2	1	133266	134033	-	TAGAGACAGATCTCACGACAGCAAATAGATGCGTAAGCACACACGGTATG	TGATTATTCTTGTGCTGATAGTGGTGCTCCTGTTACTTCTATTAGTATTA	GATCAAAACCAAACTTCGTATTCGAGCCTAAAAAACAGAATATAATGTTA	TAGAGACAGATCTCACGACAGCAAATAGATGCGTAAGCACACACGGTATGCGGATCCCCGGGTTAATTAA	TGATTATTCTTGTGCTGATAGTGGTGCTCCTGTTACTTCTATTAGTATTACGGATCCCCGGGTTAATTAA	GATCAAAACCAAACTTCGTATTCGAGCCTAAAAAACAGAATATAATGTTAGAATTCGAGCTCGTTTAAAC	0		0		0
YAL013W	DEP1,FUN54	1	134284	135544	+	AAGGGAAGGAAGCACAGAAGCAAGAGGAGGCGCATCGATCGTGGCAGATG	GGCCCAGTGACCGCCACACTGGACCCCATACCACTTCTTTTTGTTATTCT	CTAATTATTAGTAATGAAGGGTGGAATTACATAGCGTTACAACATATTTA	AAGGGAAGGAAGCACAGAAGCAAGAGGAGGCGCATCGATCGTGGCAGATGCGGATCCCCGGGTTAATTAA	GGCCCAGTGACCGCCACACTGGACCCCATACCACTTCTTTTTGTTATTCTCGGATCCCCGGGTTAATTAA	CTAATTATTAGTAATGAAGGGTGGAATTACATAGCGTTACAACATATTTAGAATTCGAGCTCGTTTAAAC	0		0		0
YAL012W	CYS3,STR1,FUN35,CYI1	1	135813	136997	+	ACATTTGCACCTTATACATATACACACAAGACAAAACCAAAAAAAATATG	CTGACGATCTTTTGGAAGACATCAAGCAAGCCTTGAAACAAGCCACCAAC	TCGTACTTAAAAAGGTCCGGTCGAAAGCAGAGACGTGGCACTGGCGATTA	ACATTTGCACCTTATACATATACACACAAGACAAAACCAAAAAAAATATGCGGATCCCCGGGTTAATTAA	CTGACGATCTTTTGGAAGACATCAAGCAAGCCTTGAAACAAGCCACCAACCGGATCCCCGGGTTAATTAA	TCGTACTTAAAAAGGTCCGGTCGAAAGCAGAGACGTGGCACTGGCGATTAGAATTCGAGCTCGTTTAAAC	0		0		0
YAL011W	SWC3,SWC1	1	137213	139090	+	GCATATGCATGCGATTTGGAAGTAACGCTCGCCGTAGACAAGTAAGAATG	TCGAACTAAATGAGTGGGAGCACGCCATGAGAAGCAGAAGACACAAAAGA	GTGTATAATCATAATGGCGTTAAAGCAGAATAAATTAACCGAACACCTTA	GCATATGCATGCGATTTGGAAGTAACGCTCGCCGTAGACAAGTAAGAATGCGGATCCCCGGGTTAATTAA	TCGAACTAAATGAGTGGGAGCACGCCATGAGAAGCAGAAGACACAAAAGACGGATCCCCGGGTTAATTAA	GTGTATAATCATAATGGCGTTAAAGCAGAATAAATTAACCGAACACCTTAGAATTCGAGCTCGTTTAAAC	0		0		0
YAL010C	MDM10,FUN37	1	139198	140679	-	GCAAATATACGTTAGGAAAAAGACACGAACAGAGAAGACCGATCTTGATG	ATATACCAGTTTTCCCGGCAAAGTTTGGCATACAATTCCAGTACTCCACA	TTTTTTAACCTGTATATTAAAACCTTTATTTTATTTCACATTACTCATTA	GCAAATATACGTTAGGAAAAAGACACGAACAGAGAAGACCGATCTTGATGCGGATCCCCGGGTTAATTAA	ATATACCAGTTTTCCCGGCAAAGTTTGGCATACAATTCCAGTACTCCACACGGATCCCCGGGTTAATTAA	TTTTTTAACCTGTATATTAAAACCTTTATTTTATTTCACATTACTCATTAGAATTCGAGCTCGTTTAAAC	0		0		0
YAL009W	SPO7	1	140868	141647	+	ATACACACAAAGGAAGAAAGATAGTGGAAAGCTAAATAAAGGAGGTCATG	AAGGTGCTAGAAGACGCAAACAAGCGCACGAACTCCGACCTAAATCAGAA	TAGGTAAATATGACCTCTTATTCGAAGGAAGAAGCCCTCCAACTCTTTCA	ATACACACAAAGGAAGAAAGATAGTGGAAAGCTAAATAAAGGAGGTCATGCGGATCCCCGGGTTAATTAA	AAGGTGCTAGAAGACGCAAACAAGCGCACGAACTCCGACCTAAATCAGAACGGATCCCCGGGTTAATTAA	TAGGTAAATATGACCTCTTATTCGAAGGAAGAAGCCCTCCAACTCTTTCAGAATTCGAGCTCGTTTAAAC	0		0		0
YAL008W	FUN14	1	141928	142524	+	TAACGCTAGAGGGGCAAGAAGGAAGAACTTAAAATAATAGGTGTAAAATG	AAGTATTCTTTACATTGAGTTTCGTATTAGCAAGTTTAAATGCTAACAAA	AAAACGAAAGAATATAACCCTCGTTTATATCTGGTCATTTGTCTTGCTCA	TAACGCTAGAGGGGCAAGAAGGAAGAACTTAAAATAATAGGTGTAAAATGCGGATCCCCGGGTTAATTAA	AAGTATTCTTTACATTGAGTTTCGTATTAGCAAGTTTAAATGCTAACAAACGGATCCCCGGGTTAATTAA	AAAACGAAAGAATATAACCCTCGTTTATATCTGGTCATTTGTCTTGCTCAGAATTCGAGCTCGTTTAAAC	0		0		0
YAL007C	ERP2	1	142712	143359	-	ACTAGAATAAGATAAACAGTGGAGTACACTCATTGTAAAGGAAAACCATG	AAGTTCTACTTATTCAATTCCTCTTCACTGGTCGTCAAAAAAATTACGTT	TTGTGTTCTATATTGCGGACATATATTTTTCGTAGATTGAAAAGTTCTTA	ACTAGAATAAGATAAACAGTGGAGTACACTCATTGTAAAGGAAAACCATGCGGATCCCCGGGTTAATTAA	AAGTTCTACTTATTCAATTCCTCTTCACTGGTCGTCAAAAAAATTACGTTCGGATCCCCGGGTTAATTAA	TTGTGTTCTATATTGCGGACATATATTTTTCGTAGATTGAAAAGTTCTTAGAATTCGAGCTCGTTTAAAC	0		0		0
YAL005C	SSA1,YG100	1	144990	146918	-	TAATCAAGTATTACAAGAAACAAAAATTCAAGTAAATAACAGATAATATG	GTGCTCCTCCAGCTCCAGAGGCTGAAGGTCCAACCGTTGAAGAAGTTGAT	ATCATTAAAAGACATTTTCGTTATTATCAATTGCCGCACCAATTGGCTTA	TAATCAAGTATTACAAGAAACAAAAATTCAAGTAAATAACAGATAATATGCGGATCCCCGGGTTAATTAA	GTGCTCCTCCAGCTCCAGAGGCTGAAGGTCCAACCGTTGAAGAAGTTGATCGGATCCCCGGGTTAATTAA	ATCATTAAAAGACATTTTCGTTATTATCAATTGCCGCACCAATTGGCTTAGAATTCGAGCTCGTTTAAAC	1	YAL004W	1	YAL004W	0
YAL004W	YAL004W	1	146247	146894	+	TGGATGAAGTGGTTGACCAATCTGTTGTCAAAATCTTCACCACCCAAATG	ATGTCCACACGATCATTAGCAAAGTGAGCAACACACGAGTATGTTGTACC	AATTCAAGTAAATAACAGATAATATGTCAAAAGCTGTCGGTATTGATTTA	TGGATGAAGTGGTTGACCAATCTGTTGTCAAAATCTTCACCACCCAAATGCGGATCCCCGGGTTAATTAA	ATGTCCACACGATCATTAGCAAAGTGAGCAACACACGAGTATGTTGTACCCGGATCCCCGGGTTAATTAA	AATTCAAGTAAATAACAGATAATATGTCAAAAGCTGTCGGTATTGATTTAGAATTCGAGCTCGTTTAAAC	1	YAL005C	1	YAL005C	0
YAL003W	EFB1,TEF5	1	147661	148647	+	TTCTACCTTTCAGCACTGAAGAGTCCAACCGAATATATAAACACATAATG	AAGACGAAGACCACGTCCAATCTACCGATATTGCTGCTATGCAAAAATTA	TTGTTTTTGCTTTAATGTTAATTATAAAAAGTTTATAAAAAAGCCTTTTA	TTCTACCTTTCAGCACTGAAGAGTCCAACCGAATATATAAACACATAATGCGGATCCCCGGGTTAATTAA	AAGACGAAGACCACGTCCAATCTACCGATATTGCTGCTATGCAAAAATTACGGATCCCCGGGTTAATTAA	TTGTTTTTGCTTTAATGTTAATTATAAAAAGTTTATAAAAAAGCCTTTTAGAATTCGAGCTCGTTTAAAC	0		0		1	snR18
YAL002W	VPS8,VPT8,FUN15	1	149193	153016	+	AAGTGTAAAATATATATCTACCGAGACCATTACTCATTACACCTAGAATG	ATGAATATTCTTGTTTAATTTGCCAGACTGAATCTAACCCAAAAATAGTA	AAATTTTACTTTTATGTAACCAAAGTTGTATTAAATATTTAGAAATGTTA	AAGTGTAAAATATATATCTACCGAGACCATTACTCATTACACCTAGAATGCGGATCCCCGGGTTAATTAA	ATGAATATTCTTGTTTAATTTGCCAGACTGAATCTAACCCAAAAATAGTACGGATCCCCGGGTTAATTAA	AAATTTTACTTTTATGTAACCAAAGTTGTATTAAATATTTAGAAATGTTAGAATTCGAGCTCGTTTAAAC	0		0		0
YAL001C	TFC3,TSV115,FUN24	1	153079	156651	-	TAAGAGAGAAGAGGATGTTTGGTTGAAGCCAACTAGCCACAAGAAAAATG	TTGATGGCTATTGGGTCAATCATAATTGGTATTCTATATTTGAATCTACA	AATACAACTTTGGTTACATAAAAGTAAAATTTATACACCTCATTTCATTA	TAAGAGAGAAGAGGATGTTTGGTTGAAGCCAACTAGCCACAAGAAAAATGCGGATCCCCGGGTTAATTAA	TTGATGGCTATTGGGTCAATCATAATTGGTATTCTATATTTGAATCTACACGGATCCCCGGGTTAATTAA	AATACAACTTTGGTTACATAAAAGTAAAATTTATACACCTCATTTCATTAGAATTCGAGCTCGTTTAAAC	0		0		0
YAR002W	NUP60	1	157742	159361	+	CCTTTACATCAAATAAGCACCGCAAGATATCCTAAAATCGACATCCAATG	GCTTGGTTGATGAAAATAAAGTTGAGGCTTTCAAGTCCCTATATACCTTT	TTGAGTTGGGCTATACGGTAATTATGTCACGGCTAAAATTTTCATTATCA	CCTTTACATCAAATAAGCACCGCAAGATATCCTAAAATCGACATCCAATGCGGATCCCCGGGTTAATTAA	GCTTGGTTGATGAAAATAAAGTTGAGGCTTTCAAGTCCCTATATACCTTTCGGATCCCCGGGTTAATTAA	TTGAGTTGGGCTATACGGTAATTATGTCACGGCTAAAATTTTCATTATCAGAATTCGAGCTCGTTTAAAC	0		0		0
YAR002C-A	ERP1	1	159553	160212	-	CTGTAATTTGGAAAAGTATTTAAAGGTAACCAATCTCTCTACTAATCATG	GCTGGCAAATGAAACACCTGGGCAAATTTTTCGTTAAGCAAAAAATTTTA	TATAAACTATAAATTTCTAGAAGATACATAAAAGGTTTTTAGTCTGATCA	CTGTAATTTGGAAAAGTATTTAAAGGTAACCAATCTCTCTACTAATCATGCGGATCCCCGGGTTAATTAA	GCTGGCAAATGAAACACCTGGGCAAATTTTTCGTTAAGCAAAAAATTTTACGGATCCCCGGGTTAATTAA	TATAAACTATAAATTTCTAGAAGATACATAAAAGGTTTTTAGTCTGATCAGAATTCGAGCTCGTTTAAAC	0		0		0
YAR003W	SWD1,SAF49,CPS50,FUN16	1	160490	161769	+	GAGACGGAGTCCTTTTAGTTTGTGTATATCAGCTGGTTCTTTTCGTTATG	GGTTCACAATCCCTACAGATTATACGAGGATAATTAAGATGCAGTCATCA	CTTCAGTGTCAGTTGCCTGTTTAAACTTTCTCCTTTTGATGAGAAACCTA	GAGACGGAGTCCTTTTAGTTTGTGTATATCAGCTGGTTCTTTTCGTTATGCGGATCCCCGGGTTAATTAA	GGTTCACAATCCCTACAGATTATACGAGGATAATTAAGATGCAGTCATCACGGATCCCCGGGTTAATTAA	CTTCAGTGTCAGTTGCCTGTTTAAACTTTCTCCTTTTGATGAGAAACCTAGAATTCGAGCTCGTTTAAAC	0		0		0
YAR007C	RFA1,RPA1,FUN3,BUF2	1	162238	164103	-	ACGGTAAAGGCGAAACCAGCAAGAAAACCAGATTATACTTACAAGAGATG	GGGCTGAAGCCGACTATCTTGCCGATGAGTTATCCAAGGCTTTGTTAGCT	TTTCTCATATGTTACATAGATTAAATAGTACTTGATTATTTGATACATTA	ACGGTAAAGGCGAAACCAGCAAGAAAACCAGATTATACTTACAAGAGATGCGGATCCCCGGGTTAATTAA	GGGCTGAAGCCGACTATCTTGCCGATGAGTTATCCAAGGCTTTGTTAGCTCGGATCCCCGGGTTAATTAA	TTTCTCATATGTTACATAGATTAAATAGTACTTGATTATTTGATACATTAGAATTCGAGCTCGTTTAAAC	0		0		0
YAR008W	SEN34,FUN4	1	164450	165277	+	CTATTAACATATATGCAAAAAGAACGGCAAAAGGCGAGGAGGTTTTTATG	AAGAGACAAAGGAAACTCATTTCTTCTCAATAGAATGGGCTGGATTTGGT	AAATACATAAATTCTGAGAAAATAATTATACATGACTGATTCTCAGCTTA	CTATTAACATATATGCAAAAAGAACGGCAAAAGGCGAGGAGGTTTTTATGCGGATCCCCGGGTTAATTAA	AAGAGACAAAGGAAACTCATTTCTTCTCAATAGAATGGGCTGGATTTGGTCGGATCCCCGGGTTAATTAA	AAATACATAAATTCTGAGAAAATAATTATACATGACTGATTCTCAGCTTAGAATTCGAGCTCGTTTAAAC	0		0		0
YAR009C	YAR009C	1	166049	166049	-	GTAGTAGAGATTTAAGGCCATCAATTACATTGTTGAAAATAAGAAAATCA		ATGATAATATGCTAGCAGTTTTAATACAAATTGATCGAAGATAGTTGATT	GTAGTAGAGATTTAAGGCCATCAATTACATTGTTGAAAATAAGAAAAATGCGGATCCCCGGGTTAATTAA	CGGATCCCCGGGTTAATTAA	ATGATAATATGCTAGCAGTTTTAATACAAATTGATCGAAGATAGTTGATTGAATTCGAGCTCGTTTAAAC	1	YAR010C	1	YAR010C	0
YAR010C	YAR010C	1	166049	166051	-	ATGTAGTAGAGATTTAAGGCCATCAATTACATTGTTGAAAATAAGAAAAT	ATGATGTAGTAGAGATTTAAGGCCATCAATTACATTGTTGAAAATAAGAA	ATGATAATATGCTAGCAGTTTTAATACAAATTGATCGAAGATAGTTGATT	ATGTAGTAGAGATTTAAGGCCATCAATTACATTGTTGAAAATAAGAAATGCGGATCCCCGGGTTAATTAA	ATGATGTAGTAGAGATTTAAGGCCATCAATTACATTGTTGAAAATAAGAACGGATCCCCGGGTTAATTAA	ATGATAATATGCTAGCAGTTTTAATACAAATTGATCGAAGATAGTTGATTGAATTCGAGCTCGTTTAAAC	1	YAR009C	1	YAR009C	0
YAR014C	BUD14	1	166630	168759	-	GTGAAATACACGTAGTTTTTAGATAACATTCTCTGCTTGGTAAGAGAATG	TTGACAGAATGGATGTGTTGATGAAACGATTGGATGAAATTATTCGTAAA	AAGTTCGTTGGATGAGAAAAAGACCAGGCTTTATTGTAGGGACAATATCA	GTGAAATACACGTAGTTTTTAGATAACATTCTCTGCTTGGTAAGAGAATGCGGATCCCCGGGTTAATTAA	TTGACAGAATGGATGTGTTGATGAAACGATTGGATGAAATTATTCGTAAACGGATCCCCGGGTTAATTAA	AAGTTCGTTGGATGAGAAAAAGACCAGGCTTTATTGTAGGGACAATATCAGAATTCGAGCTCGTTTAAAC	0		0		0
YAR015W	ADE1	1	169261	170181	+	TCATAAGCATTGCTTACAAAGAATACACATACGAAATATTAACGATAATG	CCAAATATATAGAGGCTTATGAAACATTGACAGGGTCTAAATGGTCTCAC	ATTCAGTGAGGAGTTACACTGACGACTTGTAGTATATGTAAATCACGTTA	TCATAAGCATTGCTTACAAAGAATACACATACGAAATATTAACGATAATGCGGATCCCCGGGTTAATTAA	CCAAATATATAGAGGCTTATGAAACATTGACAGGGTCTAAATGGTCTCACCGGATCCCCGGGTTAATTAA	ATTCAGTGAGGAGTTACACTGACGACTTGTAGTATATGTAAATCACGTTAGAATTCGAGCTCGTTTAAAC	0		0		0
YAR018C	KIN3,NPK1,FUN52	1	170282	171589	-	TTCAATGAGAGTGCTATTTGATAATTGAATCAATTCTCTGTGTGAGTATG	ATGGTAAAAAATTTGCCAAACCTGCATACCACTGGCAAACAAGATATCGA	CATACATACCCGTATGTATTAATGTATAAATGTTCTCAGAGCAAATTTTA	TTCAATGAGAGTGCTATTTGATAATTGAATCAATTCTCTGTGTGAGTATGCGGATCCCCGGGTTAATTAA	ATGGTAAAAAATTTGCCAAACCTGCATACCACTGGCAAACAAGATATCGACGGATCCCCGGGTTAATTAA	CATACATACCCGTATGTATTAATGTATAAATGTTCTCAGAGCAAATTTTAGAATTCGAGCTCGTTTAAAC	0		0		0
YAR019C	CDC15,LYT1	1	172097	175021	-	GACAAAACACACATAAGCACTACCCATTTTCCTGGTAAGACTATACCATG	CCAAAGATAAAAGTGACGGCTTTTCCGTCCCCATTACAACATTTCAAACA	CTGTATTATTTCTCTATATATGTATGTATGCACATGCAATTCCTACATTA	GACAAAACACACATAAGCACTACCCATTTTCCTGGTAAGACTATACCATGCGGATCCCCGGGTTAATTAA	CCAAAGATAAAAGTGACGGCTTTTCCGTCCCCATTACAACATTTCAAACACGGATCCCCGGGTTAATTAA	CTGTATTATTTCTCTATATATGTATGTATGCACATGCAATTCCTACATTAGAATTCGAGCTCGTTTAAAC	1	YAR019W-A	1	YAR019W-A	0
YAR019W-A	YAR019W-A	1	174884	175229	+	TCATCATTTTCGTACACGACCTCCTTTATTGCCACGACTTGGTCAGTATG	TAATGGCACAGCAAAGTCCGCACAGAGGACTACAGTATAGCATAGAGTGC	GTCGTGTATGGAAAAGAGGCATAATCAAAATTGGGCCTATCAACTCATTA	TCATCATTTTCGTACACGACCTCCTTTATTGCCACGACTTGGTCAGTATGCGGATCCCCGGGTTAATTAA	TAATGGCACAGCAAAGTCCGCACAGAGGACTACAGTATAGCATAGAGTGCCGGATCCCCGGGTTAATTAA	GTCGTGTATGGAAAAGAGGCATAATCAAAATTGGGCCTATCAACTCATTAGAATTCGAGCTCGTTTAAAC	1	YAR019C	1	YAR019C	0
YAR020C	PAU7	1	176740	176906	-	TAAGCCTATATCATCACTAAGCAATAACCCAAAAAACAACAAATACAATG	GTGTTTATGTTTCCGATATCAGAGCTCATTTGGCTGAATACTACTCTTTC	ACAGCTTCTGCAATTTCAACTGGATAAGTTTCAGTTGGGTGAGCAGCTTG	TAAGCCTATATCATCACTAAGCAATAACCCAAAAAACAACAAATACAATGCGGATCCCCGGGTTAATTAA	GTGTTTATGTTTCCGATATCAGAGCTCATTTGGCTGAATACTACTCTTTCCGGATCCCCGGGTTAATTAA	ACAGCTTCTGCAATTTCAACTGGATAAGTTTCAGTTGGGTGAGCAGCTTGGAATTCGAGCTCGTTTAAAC	0		0		0
YAR023C	YAR023C	1	179165	179704	-	CATACCAGAGTTATTTGCTTTACGAAATTGTACGCGCCAAGTATGTAATG	TGCGGGAATATTGGCAAAGTCAATATCCAGATGTGGGCATACCTGCAATA	AAAGATGCGTTCTTTTTATACCAATATATTAGATACGTAAACTCTACTCA	CATACCAGAGTTATTTGCTTTACGAAATTGTACGCGCCAAGTATGTAATGCGGATCCCCGGGTTAATTAA	TGCGGGAATATTGGCAAAGTCAATATCCAGATGTGGGCATACCTGCAATACGGATCCCCGGGTTAATTAA	AAAGATGCGTTCTTTTTATACCAATATATTAGATACGTAAACTCTACTCAGAATTCGAGCTCGTTTAAAC	0		0		0
YAR027W	UIP3	1	192119	192827	+	TCCAAAACCATATAATAACCTTACACAAGACAAGATATCAATTCAACATG	AAGCTGAATTTGAGTATTGGAGAAAGCANNNNNNNNNNNNNNNNNNNNNN	NNNNNNNNNNNNNNNNNNNNNNNNNNNNNNNNNNNNNNNNNNNNNNNNNN	TCCAAAACCATATAATAACCTTACACAAGACAAGATATCAATTCAACATGCGGATCCCCGGGTTAATTAA	AAGCTGAATTTGAGTATTGGAGAAAGCANNNNNNNNNNNNNNNNNNNNNNCGGATCCCCGGGTTAATTAA	NNNNNNNNNNNNNNNNNNNNNNNNNNNNNNNNNNNNNNNNNNNNNNNNNNGAATTCGAGCTCGTTTAAAC	0		0		0
YAR028W	YAR028W	1	193243	193947	+	AAAATAACATCTGTAAGTGCTATATTAAGGCAAAATATCAATTGACCATG	AGGCTCAAAGTGAATACTGGAGAAAGCAATATCCTGACGCTGATTTACCT	CGTTTTAAAGAAAAGTAAGTATACTTGGTGAATAAAATGCTTCCGCTTCA	AAAATAACATCTGTAAGTGCTATATTAAGGCAAAATATCAATTGACCATGCGGATCCCCGGGTTAATTAA	AGGCTCAAAGTGAATACTGGAGAAAGCAATATCCTGACGCTGATTTACCTCGGATCCCCGGGTTAATTAA	CGTTTTAAAGAAAAGTAAGTATACTTGGTGAATAAAATGCTTCCGCTTCAGAATTCGAGCTCGTTTAAAC	0		0		0
YAR029W	YAR029W	1	194671	194894	+	CATGCAAGCCTTCGGTGAAAGGGGAATGAAGCATTATCACGTACAAGATG	TTAAATCTCGGAGCAGATTTTCAAATTGCTTTCCAAGACAGCGGATATTG	TCAAATAATGGCATCGATATCTTGCCAATACTTCACTTAAGATTGTTCTA	CATGCAAGCCTTCGGTGAAAGGGGAATGAAGCATTATCACGTACAAGATGCGGATCCCCGGGTTAATTAA	TTAAATCTCGGAGCAGATTTTCAAATTGCTTTCCAAGACAGCGGATATTGCGGATCCCCGGGTTAATTAA	TCAAATAATGGCATCGATATCTTGCCAATACTTCACTTAAGATTGTTCTAGAATTCGAGCTCGTTTAAAC	1	YAR030C	1	YAR030C	0
YAR030C	YAR030C	1	194862	195201	-	GGCATTTTTCATTCAATACTAAAGTTCCGGAATGATACAAAATGAAAATG	ATACTTCACTTAAGATTGTTCTACAATATCCGCTGTCTTGGAAAGCAATT	GAGACTGAAGCTGGTGAATCTTTCACATTAAATCTCGGAGCAGATTTTCA	GGCATTTTTCATTCAATACTAAAGTTCCGGAATGATACAAAATGAAAATGCGGATCCCCGGGTTAATTAA	ATACTTCACTTAAGATTGTTCTACAATATCCGCTGTCTTGGAAAGCAATTCGGATCCCCGGGTTAATTAA	GAGACTGAAGCTGGTGAATCTTTCACATTAAATCTCGGAGCAGATTTTCAGAATTCGAGCTCGTTTAAAC	2	YAR029W;YAR031W	2	YAR029W;YAR031W	0
YAR031W	PRM9	1	195184	196057	+	CGATCAGAAAACTTAACCCGCAACCATCTTTGCTGTGCTAACAACTTATG	CTCAAGATGAATATTGGCGACAAGAATATCCTGGTGTCGATGAGTTTTTT	AATACCTTGCCCGGTAAAGTTGTGTGCTAATGTCTCCCGTCTTCTATCTA	CGATCAGAAAACTTAACCCGCAACCATCTTTGCTGTGCTAACAACTTATGCGGATCCCCGGGTTAATTAA	CTCAAGATGAATATTGGCGACAAGAATATCCTGGTGTCGATGAGTTTTTTCGGATCCCCGGGTTAATTAA	AATACCTTGCCCGGTAAAGTTGTGTGCTAATGTCTCCCGTCTTCTATCTAGAATTCGAGCTCGTTTAAAC	1	YAR030C	1	YAR030C	0
YAR033W	MST28	1	196432	197136	+	CAATCAGGAATACTATAGTCATAGGCAATACAAGGTATATATTGGCTATG	ACTGGCGAAGGCGGCATCCCAATATCGATGCGCTTCTTAAAAAGACGGAA	ATCATACTCTAGTTTATGTTCGCTTTACGTATGGCAGTGTCTCTAAGCTA	CAATCAGGAATACTATAGTCATAGGCAATACAAGGTATATATTGGCTATGCGGATCCCCGGGTTAATTAA	ACTGGCGAAGGCGGCATCCCAATATCGATGCGCTTCTTAAAAAGACGGAACGGATCCCCGGGTTAATTAA	ATCATACTCTAGTTTATGTTCGCTTTACGTATGGCAGTGTCTCTAAGCTAGAATTCGAGCTCGTTTAAAC	0		0		0
YAR035W	YAT1	1	199411	201474	+	ACTACACGACAATAACCACACCCCCCCACCCCTCCTTTCCGTATACAATG	TGAAATACCTGTTGTCCGGCTACGATTACTTCGACGTGAGCGTGTCCGGT	GTAGTAGTAGTAGTAGTAGTATTGATGCGCAAAAACTCAGCATAAACTCA	ACTACACGACAATAACCACACCCCCCCACCCCTCCTTTCCGTATACAATGCGGATCCCCGGGTTAATTAA	TGAAATACCTGTTGTCCGGCTACGATTACTTCGACGTGAGCGTGTCCGGTCGGATCCCCGGGTTAATTAA	GTAGTAGTAGTAGTAGTAGTATTGATGCGCAAAAACTCAGCATAAACTCAGAATTCGAGCTCGTTTAAAC	0		0		0
YAR035C-A	YAR035C-A	1	201564	201646	-	TGGTGCACGTTCGCTCGGCGAGTAAAAGAGGTAATGCAAACGACGGGATG	AGTAGCCAGCGGCGGCGCCAGTCACTTCCAAAGCGTTTTCCTCTTATTTT	ACTACTATTATTATTATTATTTTTACTACTACATACTATTAAATATACTA	TGGTGCACGTTCGCTCGGCGAGTAAAAGAGGTAATGCAAACGACGGGATGCGGATCCCCGGGTTAATTAA	AGTAGCCAGCGGCGGCGCCAGTCACTTCCAAAGCGTTTTCCTCTTATTTTCGGATCCCCGGGTTAATTAA	ACTACTATTATTATTATTATTTTTACTACTACATACTATTAAATATACTAGAATTCGAGCTCGTTTAAAC	0		0		0
YAR042W	SWH1,OSH1,YAR044W	1	201852	205418	+	GGGAAAAGTTTAAACATCAAAGTACACCTTTCACCCCTCCACACACTATG	ATTGGAACAAAAGAAAAAATCATGACTTTAAAGATTGTGCTGATATTTTC	GCAATGGATACAAATGAACGAGTGTTATTGTGACCACATTGCACAGCTTA	GGGAAAAGTTTAAACATCAAAGTACACCTTTCACCCCTCCACACACTATGCGGATCCCCGGGTTAATTAA	ATTGGAACAAAAGAAAAAATCATGACTTTAAAGATTGTGCTGATATTTTCCGGATCCCCGGGTTAATTAA	GCAATGGATACAAATGAACGAGTGTTATTGTGACCACATTGCACAGCTTAGAATTCGAGCTCGTTTAAAC	0		0		0
YAR047C	YAR047C	1	211962	212282	-	NNNNNNNNNNNNNNNNNNNNNNNNNNNNNNNNNNNNNNNNNNNNNNNNNN	NNNNNNNNNNNNNNNNNNNNNNNNNNNNNNNNNNNNNNNNNNNNNNNNNN	NNNNNNNNNNNNNNNNNNNNNNNNNNNNNNNNNNNNNNNNNNNNNNNNNN	NNNNNNNNNNNNNNNNNNNNNNNNNNNNNNNNNNNNNNNNNNNNNNNATGCGGATCCCCGGGTTAATTAA	NNNNNNNNNNNNNNNNNNNNNNNNNNNNNNNNNNNNNNNNNNNNNNNNNNCGGATCCCCGGGTTAATTAA	NNNNNNNNNNNNNNNNNNNNNNNNNNNNNNNNNNNNNNNNNNNNNNNNNNGAATTCGAGCTCGTTTAAAC	0		0		0
YAR050W	FLO1,FLO4,FLO2	1	215796	225155	+	GGGTTCTTATTTTTAATTCTTGTCACCAGTTAACAGAACATCCAAAAATG	ATACTGGGGCTGCTGAGACAAAAACAGCAGTCACCTCTTCACTTTCAAGA	CGGAAGCCGTCTGTGTTTCAGCGTGATNNNNNNNNNNNNNNNNNNNNGAA	GGGTTCTTATTTTTAATTCTTGTCACCAGTTAACAGAACATCCAAAAATGCGGATCCCCGGGTTAATTAA	ATACTGGGGCTGCTGAGACAAAAACAGCAGTCACCTCTTCACTTTCAAGACGGATCCCCGGGTTAATTAA	CGGAAGCCGTCTGTGTTTCAGCGTGATNNNNNNNNNNNNNNNNNNNNGAAGAATTCGAGCTCGTTTAAAC	0		0		0
YAR053W	YAR053W	1	225847	226135	+	NNNNNNNNNNNNNNNNNNNNNNNNNNNNNNNNNNNNNNNNNNNNNNNNNN	TATTTATTTCGAATTCTTTTGCACTAGTATTTAAAATATCAGCAGAGGCG	AGTATCAATTTTAGGGCAAGTAGTTTTACAATAATTTTGGTGCACTTTTA	NNNNNNNNNNNNNNNNNNNNNNNNNNNNNNNNNNNNNNNNNNNNNNNATGCGGATCCCCGGGTTAATTAA	TATTTATTTCGAATTCTTTTGCACTAGTATTTAAAATATCAGCAGAGGCGCGGATCCCCGGGTTAATTAA	AGTATCAATTTTAGGGCAAGTAGTTTTACAATAATTTTGGTGCACTTTTAGAATTCGAGCTCGTTTAAAC	0		0		0
YAR060C	YAR060C	1	234640	234975	-	CTTTATCGGCGTGCGCAGGAAAAGAAAGAAAAAGGAAGGAAAAAGAGATG	TAATAGGTATCTCGTCTAGCGTAGTATCTCGAGTTTCCAGAAGTTGCAGA	CTCTTCTAAGCTGTAATTTAAAAAAAGCGATAAAACAATGATTTTGATTA	CTTTATCGGCGTGCGCAGGAAAAGAAAGAAAAAGGAAGGAAAAAGAGATGCGGATCCCCGGGTTAATTAA	TAATAGGTATCTCGTCTAGCGTAGTATCTCGAGTTTCCAGAAGTTGCAGACGGATCCCCGGGTTAATTAA	CTCTTCTAAGCTGTAATTTAAAAAAAGCGATAAAACAATGATTTTGATTAGAATTCGAGCTCGTTTAAAC	0		0		0
YAR061W	YAR061W	1	235623	235826	+	TAAAAGTTATTGTTTAATATACCCATACCTGATTGACGAACCAAGAAATG	CGTATTCCTACCCGCAATATATGACTTCTGGATATGCCTCGAATTGGAAT	AGAAAGATCGTAGTCAATTGAGAAATCCGTCTGTCCGCCAACGGAACCTA	TAAAAGTTATTGTTTAATATACCCATACCTGATTGACGAACCAAGAAATGCGGATCCCCGGGTTAATTAA	CGTATTCCTACCCGCAATATATGACTTCTGGATATGCCTCGAATTGGAATCGGATCCCCGGGTTAATTAA	AGAAAGATCGTAGTCAATTGAGAAATCCGTCTGTCCGCCAACGGAACCTAGAATTCGAGCTCGTTTAAAC	0		0		0
YAR062W	YAR062W	1	236032	236628	+	ACTGATTTACTTGGTTTCTTACTATCCCAAAAAACGCTACTCTAGAAATG	CCAGTTTGTCATCATCTTCTTCAGAACAAATCACCAGCTCTATCACGTCT	ACTACAGAAGTTCCATTGCTGCGATAGAATGGAGTAATAATTGGATGCTA	ACTGATTTACTTGGTTTCTTACTATCCCAAAAAACGCTACTCTAGAAATGCGGATCCCCGGGTTAATTAA	CCAGTTTGTCATCATCTTCTTCAGAACAAATCACCAGCTCTATCACGTCTCGGATCCCCGGGTTAATTAA	ACTACAGAAGTTCCATTGCTGCGATAGAATGGAGTAATAATTGGATGCTAGAATTCGAGCTCGTTTAAAC	0		0		0
YAR064W	YAR064W	1	237681	237980	+	GGAAAGATATTCTTTAACGAGACGGAGTAATTCTCGTCAGGAATAGGATG	ATCTTTTTCTTTTCTGTTTTTGGCGTATGATCTGTTCTGAGCCAAAGTTA	CTTTCTATACAATCCCTACTCTGTGAGGTGCTTATTCAAGCAATGATCTA	GGAAAGATATTCTTTAACGAGACGGAGTAATTCTCGTCAGGAATAGGATGCGGATCCCCGGGTTAATTAA	ATCTTTTTCTTTTCTGTTTTTGGCGTATGATCTGTTCTGAGCCAAAGTTACGGATCCCCGGGTTAATTAA	CTTTCTATACAATCCCTACTCTGTGAGGTGCTTATTCAAGCAATGATCTAGAATTCGAGCTCGTTTAAAC	0		0		0
YAR066W	YAR066W	1	238532	239143	+	TCTTTCTTTTTATTGGTAAACTCTCGCCCATTACAAAAAAAAAAGAGATG	CCTTTTCTTTGTCAAATGCTATTCTCAACGGTGGTTCTGTTTCCGGTTTG	AGGTTGATTTCACCGTTATTTACAGAGCCTTCATCGTCGTCTCTACGTTA	TCTTTCTTTTTATTGGTAAACTCTCGCCCATTACAAAAAAAAAAGAGATGCGGATCCCCGGGTTAATTAA	CCTTTTCTTTGTCAAATGCTATTCTCAACGGTGGTTCTGTTTCCGGTTTGCGGATCCCCGGGTTAATTAA	AGGTTGATTTCACCGTTATTTACAGAGCCTTCATCGTCGTCTCTACGTTAGAATTCGAGCTCGTTTAAAC	0		0		0
YAR068W	YAR068W	1	239889	240374	+	CACCTCAGGTTCCGCTTCTGTCTACACTACTACATTAACTTACTTGAATG	CAGCACCTTCACTGGTATTGTCGTTCAATCCGAAGGTATGGCTGCTGGTT	AAAAGCAAGGATGAAAATACCTGCCAAAGTACTTAAAGCATTGGTTCTCA	CACCTCAGGTTCCGCTTCTGTCTACACTACTACATTAACTTACTTGAATGCGGATCCCCGGGTTAATTAA	CAGCACCTTCACTGGTATTGTCGTTCAATCCGAAGGTATGGCTGCTGGTTCGGATCCCCGGGTTAATTAA	AAAAGCAAGGATGAAAATACCTGCCAAAGTACTTAAAGCATTGGTTCTCAGAATTCGAGCTCGTTTAAAC	0		0		0
YAR069C	YAR069C	1	241495	241788	-	NNNNNNNNNNNNNNNNNNNNNNNNNNNNNNNNNNNNNNNNNNNNNNNNNN	NNNNNNNNNNNNNNNNNNNNNNNNNNNNNNNNNNNNNNNNNNNNNNNNNN	NNNNNNNNNNNNNNNNNNNNNNNNNNNNNNNNNNNNNNNNNNNNNNNNNN	NNNNNNNNNNNNNNNNNNNNNNNNNNNNNNNNNNNNNNNNNNNNNNNATGCGGATCCCCGGGTTAATTAA	NNNNNNNNNNNNNNNNNNNNNNNNNNNNNNNNNNNNNNNNNNNNNNNNNNCGGATCCCCGGGTTAATTAA	NNNNNNNNNNNNNNNNNNNNNNNNNNNNNNNNNNNNNNNNNNNNNNNNNNGAATTCGAGCTCGTTTAAAC	0		0		0
YAR070C	YAR070C	1	242386	242685	-	NNNNNNNNNNNNNNNNNNNNNNNNNNNNNNNNNNNNNNNNNNNNNNNNNN	NNNNNNNNNNNNNNNNNNNNNNNNNNNNNNNNNNNNNNNNNNNNNNNNNN	NNNNNNNNNNNNNNNNNNNNNNNNNNNNNNNNNNNNNNNNNNNNNNNNNN	NNNNNNNNNNNNNNNNNNNNNNNNNNNNNNNNNNNNNNNNNNNNNNNATGCGGATCCCCGGGTTAATTAA	NNNNNNNNNNNNNNNNNNNNNNNNNNNNNNNNNNNNNNNNNNNNNNNNNNCGGATCCCCGGGTTAATTAA	NNNNNNNNNNNNNNNNNNNNNNNNNNNNNNNNNNNNNNNNNNNNNNNNNNGAATTCGAGCTCGTTTAAAC	0		0		0
YAR071W	PHO11	1	243283	244686	+	GAGGAACAACAACAGCAAAGAGAGCAAGAACATCATCAGAAATACCAATG	TTTTCTGGGAGTGGAATACCAAGCACTACAACGACACTTTATTAAAACAG	NNNNNNNNNNNNNNNNNNNNNNNNNNNNNNNNTCATATTAGGTCTATTTA	GAGGAACAACAACAGCAAAGAGAGCAAGAACATCATCAGAAATACCAATGCGGATCCCCGGGTTAATTAA	TTTTCTGGGAGTGGAATACCAAGCACTACAACGACACTTTATTAAAACAGCGGATCCCCGGGTTAATTAA	NNNNNNNNNNNNNNNNNNNNNNNNNNNNNNNNTCATATTAGGTCTATTTAGAATTCGAGCTCGTTTAAAC	0		0		0
YAR073W	IMD1	1	245786	246997	+	NNNNNNNNNNNNNNNNNNNNNNNNNNNNNNNNNNNNNNNNNNNNNNNNNN	NNNNNNNNNNNNNNNNNNNNNNNNNNNNNNNNNNNNNNNNNNNNNNNNNN	NNNNNNNNNNNNNNNNNNNNNNNNNNNNNNNNNNNNNNNNNNNNNNNNNN	NNNNNNNNNNNNNNNNNNNNNNNNNNNNNNNNNNNNNNNNNNNNNNNATGCGGATCCCCGGGTTAATTAA	NNNNNNNNNNNNNNNNNNNNNNNNNNNNNNNNNNNNNNNNNNNNNNNNNNCGGATCCCCGGGTTAATTAA	NNNNNNNNNNNNNNNNNNNNNNNNNNNNNNNNNNNNNNNNNNNNNNNNNNGAATTCGAGCTCGTTTAAAC	1	YAR075W	1	YAR075W	0
YAR075W	YAR075W	1	246888	247361	+	NNNNNNNNNNNNNNNNNNNNNNNNNNNNNNNNNNNNNNNNNNNNNNNNNN	NNNNNNNNNNNNNNNNNNNNNNNNNNNNNNNNNNNNNNNNNNNNNNNNNN	NNNNNNNNNNNNNNNNNNNNNNNNNNNNNNNNNNNNNNNNNNNNNNNNNN	NNNNNNNNNNNNNNNNNNNNNNNNNNNNNNNNNNNNNNNNNNNNNNNATGCGGATCCCCGGGTTAATTAA	NNNNNNNNNNNNNNNNNNNNNNNNNNNNNNNNNNNNNNNNNNNNNNNNNNCGGATCCCCGGGTTAATTAA	NNNNNNNNNNNNNNNNNNNNNNNNNNNNNNNNNNNNNNNNNNNNNNNNNNGAATTCGAGCTCGTTTAAAC	1	YAR073W	1	YAR073W	0
YBL113C	YBL113C	2	280	3773	-	NNNNNNNNNNNNNNNNNNNNNNNNNNNNNNNNNNNNNNNNNNNNNNNNNN	NNNNNNNNNNNNNNNNNNNNNNNNNNNNNNNNNNNNNNNNNNNNNNNNNN	NNNNNNNNNNNNNNNNNNNNNNNNNNNNNNNNNNNNNNNNNNNNNNNNNN	NNNNNNNNNNNNNNNNNNNNNNNNNNNNNNNNNNNNNNNNNNNNNNNATGCGGATCCCCGGGTTAATTAA	NNNNNNNNNNNNNNNNNNNNNNNNNNNNNNNNNNNNNNNNNNNNNNNNNNCGGATCCCCGGGTTAATTAA	NNNNNNNNNNNNNNNNNNNNNNNNNNNNNNNNNNNNNNNNNNNNNNNNNNGAATTCGAGCTCGTTTAAAC	2	YBL113W-A;YBL112C	2	YBL113W-A;YBL112C	0
YBL113W-A	YBL113W-A	2	646	1128	+	NNNNNNNNNNNNNNNNNNNNNNNNNNNNNNNNNNNNNNNNNNNNNNNNNN	NNNNNNNNNNNNNNNNNNNNNNNNNNNNNNNNNNNNNNNNNNNNNNNNNN	NNNNNNNNNNNNNNNNNNNNNNNNNNNNNNNNNNNNNNNNNNNNNNNNNN	NNNNNNNNNNNNNNNNNNNNNNNNNNNNNNNNNNNNNNNNNNNNNNNATGCGGATCCCCGGGTTAATTAA	NNNNNNNNNNNNNNNNNNNNNNNNNNNNNNNNNNNNNNNNNNNNNNNNNNCGGATCCCCGGGTTAATTAA	NNNNNNNNNNNNNNNNNNNNNNNNNNNNNNNNNNNNNNNNNNNNNNNNNNGAATTCGAGCTCGTTTAAAC	1	YBL113C	1	YBL113C	0
YBL112C	YBL112C	2	3697	4014	-	NNNNNNNNNNNNNNNNNNNNNNNNNNNNNNNNNNNNNNNNNNNNNNNNNN	NNNNNNNNNNNNNNNNNNNNNNNNNNNNNNNNNNNNNNNNNNNNNNNNNN	NNNNNNNNNNNNNNNNNNNNNNNNNNNNNNNNNNNNNNNNNNNNNNNNNN	NNNNNNNNNNNNNNNNNNNNNNNNNNNNNNNNNNNNNNNNNNNNNNNATGCGGATCCCCGGGTTAATTAA	NNNNNNNNNNNNNNNNNNNNNNNNNNNNNNNNNNNNNNNNNNNNNNNNNNCGGATCCCCGGGTTAATTAA	NNNNNNNNNNNNNNNNNNNNNNNNNNNNNNNNNNNNNNNNNNNNNNNNNNGAATTCGAGCTCGTTTAAAC	1	YBL113C	1	YBL113C	0
YBL111C	YBL111C	2	4022	6124	-	NNNNNNNNNNNNNNNNNNNNNNNNNNNNNNNNNNNNNNNNNNNNNNNNNN	NNNNNNNNNNNNNNNNNNNNNNNNNNNNNNNNNNNNNNNNNNNNNNNNNN	NNNNNNNNNNNNNNNNNNNNNNNNNNNNNNNNNNNNNNNNNNNNNNNNNN	NNNNNNNNNNNNNNNNNNNNNNNNNNNNNNNNNNNNNNNNNNNNNNNATGCGGATCCCCGGGTTAATTAA	NNNNNNNNNNNNNNNNNNNNNNNNNNNNNNNNNNNNNNNNNNNNNNNNNNCGGATCCCCGGGTTAATTAA	NNNNNNNNNNNNNNNNNNNNNNNNNNNNNNNNNNNNNNNNNNNNNNNNNNGAATTCGAGCTCGTTTAAAC	0		0		0
YBL109W	YBL109W	2	6973	7310	+	NNNNNNNNNNNNNNNNNNNNNNNNNNNNNNNNNNNNNNNNNNNNNNNNNN	NNNNNNNNNNNNNNNNNNNNNNNNNNNNNNNNNNNNNNNNNNNNNNNNNN	NNNNNNNNNNNNNNNNNNNNNNNNNNNNNNNNNNNNNNNNNNNNNNNNNN	NNNNNNNNNNNNNNNNNNNNNNNNNNNNNNNNNNNNNNNNNNNNNNNATGCGGATCCCCGGGTTAATTAA	NNNNNNNNNNNNNNNNNNNNNNNNNNNNNNNNNNNNNNNNNNNNNNNNNNCGGATCCCCGGGTTAATTAA	NNNNNNNNNNNNNNNNNNNNNNNNNNNNNNNNNNNNNNNNNNNNNNNNNNGAATTCGAGCTCGTTTAAAC	0		0		0
YBL108C-A	PAU9	2	8780	8908	-	CAGTCGAAGTTGCTGAAGCCGTTTTCAACTACGGTGACTTCACCACTATG	CAGCTATCTCCAAGGCTCTATCCAAGGACGGTATCTACACTATCGCAAAC	ATTACTTTTCACTGTCTATGGATTTTCATTCGTAAAGGCATCACTCCCTA	CAGTCGAAGTTGCTGAAGCCGTTTTCAACTACGGTGACTTCACCACTATGCGGATCCCCGGGTTAATTAA	CAGCTATCTCCAAGGCTCTATCCAAGGACGGTATCTACACTATCGCAAACCGGATCCCCGGGTTAATTAA	ATTACTTTTCACTGTCTATGGATTTTCATTCGTAAAGGCATCACTCCCTAGAATTCGAGCTCGTTTAAAC	0		0		0
YBL108W	YBL108W	2	9350	9655	+	CTCACATATTCTCCATATCTCATCTTTCACACAATCTCATTATCACTATG	CTAAACGGTTTCCATGCAAAGCAACATCTTTGTTACTCATTCCTGAAGGT	AGAATCTAACAATATACGACTCCCTGCACATGGTTGCTATTTTTTATTCA	CTCACATATTCTCCATATCTCATCTTTCACACAATCTCATTATCACTATGCGGATCCCCGGGTTAATTAA	CTAAACGGTTTCCATGCAAAGCAACATCTTTGTTACTCATTCCTGAAGGTCGGATCCCCGGGTTAATTAA	AGAATCTAACAATATACGACTCCCTGCACATGGTTGCTATTTTTTATTCAGAATTCGAGCTCGTTTAAAC	0		0		0
YBL107W-A	YBL107W-A	2	10441	10545	+	AAGGATTGATAATGTAATAGGATCAATGAATATTAACATATAAAACGATG	TTCCTAAATCCTGGAGGAGAACTTCTAGTATATCTACATACCTAATATTA	AGAATGTGGATTTTGATGTAATTGTTGGGATTCCATTGTGATTAAGGCTA	AAGGATTGATAATGTAATAGGATCAATGAATATTAACATATAAAACGATGCGGATCCCCGGGTTAATTAA	TTCCTAAATCCTGGAGGAGAACTTCTAGTATATCTACATACCTAATATTACGGATCCCCGGGTTAATTAA	AGAATGTGGATTTTGATGTAATTGTTGGGATTCCATTGTGATTAAGGCTAGAATTCGAGCTCGTTTAAAC	0		0		0
YBL107C	YBL107C	2	11134	11724	-	AGTTAGAAAAAAAACTTCTCATTTATACACGTAGACAAAAAGACGGTATG	AAAATAATGACTACTTGAAGGAGTTTACGCAATTCTGCAAGGACAACAGT	AATCTTTAAGTGATATAATCTTTCAGCGGACTAGAAGAATAGGGCGTTCA	AGTTAGAAAAAAAACTTCTCATTTATACACGTAGACAAAAAGACGGTATGCGGATCCCCGGGTTAATTAA	AAAATAATGACTACTTGAAGGAGTTTACGCAATTCTGCAAGGACAACAGTCGGATCCCCGGGTTAATTAA	AATCTTTAAGTGATATAATCTTTCAGCGGACTAGAAGAATAGGGCGTTCAGAATTCGAGCTCGTTTAAAC	0		0		0
YBL106C	SRO77,SNI2,SOP2	2	12020	15052	-	ATAAAAGTTACAAAATTGTCAATTGAACAGATACAAAAATTTTATAAATG	ACGCAATGGAAGAAACGGGAAGGGATATGATGAAGAGCGCTGTAGGTTTT	TGCGAGCAAGGGCAACCTGATCGAATTTTATAAAAACTATTTATGGACTA	ATAAAAGTTACAAAATTGTCAATTGAACAGATACAAAAATTTTATAAATGCGGATCCCCGGGTTAATTAA	ACGCAATGGAAGAAACGGGAAGGGATATGATGAAGAGCGCTGTAGGTTTTCGGATCCCCGGGTTAATTAA	TGCGAGCAAGGGCAACCTGATCGAATTTTATAAAAACTATTTATGGACTAGAATTCGAGCTCGTTTAAAC	0		0		0
YBL105C	PKC1,STT1,HPO2,CLY15	2	15414	18869	-	AGGAAAAGTAAGTATAGTATCACACATATAGGGAGCAGTTTACAGTCATG	AGCAAGAAGAGTTTAGAGGATTTTCCTTTATGCCAGATGATTTGGATTTA	TTAGATGTTTTATATAAAATTAAATAAATCATGGCATGACCTTTTCTTCA	AGGAAAAGTAAGTATAGTATCACACATATAGGGAGCAGTTTACAGTCATGCGGATCCCCGGGTTAATTAA	AGCAAGAAGAGTTTAGAGGATTTTCCTTTATGCCAGATGATTTGGATTTACGGATCCCCGGGTTAATTAA	TTAGATGTTTTATATAAAATTAAATAAATCATGGCATGACCTTTTCTTCAGAATTCGAGCTCGTTTAAAC	0		0		0
YBL104C	YBL104C	2	19350	22466	-	TACTGGTAGTCGTAAGTGCAGTATCACGAACGTATAGAAGAATAAACATG	ACAGACATAATGTTTGTCCCACTCCAGGTTGCACCTGCCAGTGTAATAAG	ATTGTGAGAATAAAGAGAAGTTGCAAGATTTGGTTTATTGTACAATACTA	TACTGGTAGTCGTAAGTGCAGTATCACGAACGTATAGAAGAATAAACATGCGGATCCCCGGGTTAATTAA	ACAGACATAATGTTTGTCCCACTCCAGGTTGCACCTGCCAGTGTAATAAGCGGATCCCCGGGTTAATTAA	ATTGTGAGAATAAAGAGAAGTTGCAAGATTTGGTTTATTGTACAATACTAGAATTCGAGCTCGTTTAAAC	0		0		0
YBL103C	RTG3	2	23249	24709	-	TACTCTTATTTTTTGTCAGGCGAACCTACTTCTTAAATAAGTGAAGAATG	GAGATGACAACTCTAATCCAGCTGACTATCTTTTAGAATTTGGTTCGGGG	CCTGACCTTTTTCAAATTTAATTTTTTCCCGCTAATAAGACCATAAACTA	TACTCTTATTTTTTGTCAGGCGAACCTACTTCTTAAATAAGTGAAGAATGCGGATCCCCGGGTTAATTAA	GAGATGACAACTCTAATCCAGCTGACTATCTTTTAGAATTTGGTTCGGGGCGGATCCCCGGGTTAATTAA	CCTGACCTTTTTCAAATTTAATTTTTTCCCGCTAATAAGACCATAAACTAGAATTCGAGCTCGTTTAAAC	0		0		0
YBL102W	SFT2	2	25271	25918	+	GCGTTTTTTTTTTTTGCTGGTAAAAAAAAAGAACAAGTGTGGAGAATATG	GGATGTTAAGCTCTGCTGGTGTCAATTCGGCAAGAGGTGTTCTGCGCATC	TTTTTCTTCTTCAACTAATCAATTCAATATGCACTATGAATGATAATTCA	GCGTTTTTTTTTTTTGCTGGTAAAAAAAAAGAACAAGTGTGGAGAATATGCGGATCCCCGGGTTAATTAA	GGATGTTAAGCTCTGCTGGTGTCAATTCGGCAAGAGGTGTTCTGCGCATCCGGATCCCCGGGTTAATTAA	TTTTTCTTCTTCAACTAATCAATTCAATATGCACTATGAATGATAATTCAGAATTCGAGCTCGTTTAAAC	0		0		0
YBL101C	ECM21	2	26119	29391	-	TTTAAATAGAGAAGAACAAGCAAGATTTTTCCCTACCCCTATTGGGCATG	ACGAGCCTCCGCGTTATGACGAAATAGTGCCTTTGATGAGTGATGAAGAA	TATAATTATCGTAGAATAATTCAAAAAAAAATAAAAAACGAAAAAATTCA	TTTAAATAGAGAAGAACAAGCAAGATTTTTCCCTACCCCTATTGGGCATGCGGATCCCCGGGTTAATTAA	ACGAGCCTCCGCGTTATGACGAAATAGTGCCTTTGATGAGTGATGAAGAACGGATCCCCGGGTTAATTAA	TATAATTATCGTAGAATAATTCAAAAAAAAATAAAAAACGAAAAAATTCAGAATTCGAGCTCGTTTAAAC	0		0		0
YBL100W-C	YBL100W-C	2	29519	29638	+	AAACGTGGCTTATCTCAGAGCTAAGACAGACCTTCCGAGCAATAATAATG	GCGGGAAAGTGGAGAACCCTTGGAAGAGTCAGATCAGAGATTGGAAAAAT	TATATCACTCACACTCGATTCACAGGATCTGTAGATATCCATTGGTCTTA	AAACGTGGCTTATCTCAGAGCTAAGACAGACCTTCCGAGCAATAATAATGCGGATCCCCGGGTTAATTAA	GCGGGAAAGTGGAGAACCCTTGGAAGAGTCAGATCAGAGATTGGAAAAATCGGATCCCCGGGTTAATTAA	TATATCACTCACACTCGATTCACAGGATCTGTAGATATCCATTGGTCTTAGAATTCGAGCTCGTTTAAAC	0		0		0
YBL100W-A	YBL100W-A	2	30733	30733	+	AGAAACAGTGATCAAACTCAATAAAGAGCTGAATACAAGCACATATAATA		TTATTATTATTATTCTTTCATAATGTGTGTTATCGTTCATTATTCTATTA	AGAAACAGTGATCAAACTCAATAAAGAGCTGAATACAAGCACATATAATGCGGATCCCCGGGTTAATTAA	CGGATCCCCGGGTTAATTAA	TTATTATTATTATTCTTTCATAATGTGTGTTATCGTTCATTATTCTATTAGAATTCGAGCTCGTTTAAAC	1	YBL100W-B	1	YBL100W-B	0
YBL100W-B	YBL100W-B	2	30733	30733	+	AGAAACAGTGATCAAACTCAATAAAGAGCTGAATACAAGCACATATAATA		TTATTATTATTATTCTTTCATAATGTGTGTTATCGTTCATTATTCTATTA	AGAAACAGTGATCAAACTCAATAAAGAGCTGAATACAAGCACATATAATGCGGATCCCCGGGTTAATTAA	CGGATCCCCGGGTTAATTAA	TTATTATTATTATTCTTTCATAATGTGTGTTATCGTTCATTATTCTATTAGAATTCGAGCTCGTTTAAAC	1	YBL100W-A	1	YBL100W-A	0
YBL100C	YBL100C	2	31729	32044	-	CCATACCTTTAACACCAGAGGAGAACTCGACCAATTCTTCAGCCTGAATG	GTGTTTTTTTTTATTTATTTTGTTACTGTTCTTGCGATAGTTATGAGAGC	GAAGTTTTTTTCCTCATCGCGAACCATTAGTATAACAGATTGATCGTTCA	CCATACCTTTAACACCAGAGGAGAACTCGACCAATTCTTCAGCCTGAATGCGGATCCCCGGGTTAATTAA	GTGTTTTTTTTTATTTATTTTGTTACTGTTCTTGCGATAGTTATGAGAGCCGGATCCCCGGGTTAATTAA	GAAGTTTTTTTCCTCATCGCGAACCATTAGTATAACAGATTGATCGTTCAGAATTCGAGCTCGTTTAAAC	1	YBL099W	1	YBL099W	0
YBL099W	ATP1	2	31794	33431	+	GCAAGAACAGTAACAAAATAAATAAAAAAAAACACGCACATATAATAATG	AATTGTTGGCATCTCTAAAGAGTGCTACTGAATCATTTGTTGCCACTTTT	TCTTTTTGAGACGTACCTTATATTCATTTTTATTTTTTTAGTTCACATTA	GCAAGAACAGTAACAAAATAAATAAAAAAAAACACGCACATATAATAATGCGGATCCCCGGGTTAATTAA	AATTGTTGGCATCTCTAAAGAGTGCTACTGAATCATTTGTTGCCACTTTTCGGATCCCCGGGTTAATTAA	TCTTTTTGAGACGTACCTTATATTCATTTTTATTTTTTTAGTTCACATTAGAATTCGAGCTCGTTTAAAC	1	YBL100C	1	YBL100C	0
YBL098W	BNA4	2	33885	35267	+	GACAGTTAAAAAATCACGTAGTCAGTTAATCTGTTTAACTTGAAAATATG	TATCTATTGGCGGTTACAAGCTTTTCAAATTTTTGACAAGAGAACGTTCC	TTAATAATCCTCTCCTAGCGTACACGGATGGCAAGAATAAACTGGCTTCA	GACAGTTAAAAAATCACGTAGTCAGTTAATCTGTTTAACTTGAAAATATGCGGATCCCCGGGTTAATTAA	TATCTATTGGCGGTTACAAGCTTTTCAAATTTTTGACAAGAGAACGTTCCCGGATCCCCGGGTTAATTAA	TTAATAATCCTCTCCTAGCGTACACGGATGGCAAGAATAAACTGGCTTCAGAATTCGAGCTCGTTTAAAC	0		0		0
YBL097W	BRN1	2	35570	37834	+	CTTAGTGGACTTTTTGGAGCAAAAAAACCAGCAGGTAGTTATATAAGATG	ATGACTTGATAGTGAATTATGAGGATCTAGCGACAACACAGGCAGCGTCA	CTTTGCAGCACAAAAAAAAAAAAAAAAAAAAAAAAAAAGATCATCAACTA	CTTAGTGGACTTTTTGGAGCAAAAAAACCAGCAGGTAGTTATATAAGATGCGGATCCCCGGGTTAATTAA	ATGACTTGATAGTGAATTATGAGGATCTAGCGACAACACAGGCAGCGTCACGGATCCCCGGGTTAATTAA	CTTTGCAGCACAAAAAAAAAAAAAAAAAAAAAAAAAAAGATCATCAACTAGAATTCGAGCTCGTTTAAAC	0		0		0
YBL096C	YBL096C	2	37913	38221	-	CCTGGGCCAACTTGTTGTAAACCTCGCTTTTCTCGATTTGAGCGAGGATG	ATAAATACCTTGTTTTATATCCACTTTTCGAAGCGGTCCCCTTTCGGCGA	TTTTTGTGCTGCAAAGTTTCTTAAAGCCTTCGGGCTTACGAAATCCTTTA	CCTGGGCCAACTTGTTGTAAACCTCGCTTTTCTCGATTTGAGCGAGGATGCGGATCCCCGGGTTAATTAA	ATAAATACCTTGTTTTATATCCACTTTTCGAAGCGGTCCCCTTTCGGCGACGGATCCCCGGGTTAATTAA	TTTTTGTGCTGCAAAGTTTCTTAAAGCCTTCGGGCTTACGAAATCCTTTAGAATTCGAGCTCGTTTAAAC	1	YBL095W	1	YBL095W	0
YBL095W	YBL095W	2	38016	38828	+	TATAGACAATGACCAAATGACAGGATAGATCGAGGGTGAGTTCCAATATG	TTCTCGTTGAGCCTACTTGGTTCAAATATTTTAAATGGCTTGATATGTTT	AATATTAATTAACACGGAATAGGCTATTTTGAGACAGGCATGCTTTTTCA	TATAGACAATGACCAAATGACAGGATAGATCGAGGGTGAGTTCCAATATGCGGATCCCCGGGTTAATTAA	TTCTCGTTGAGCCTACTTGGTTCAAATATTTTAAATGGCTTGATATGTTTCGGATCCCCGGGTTAATTAA	AATATTAATTAACACGGAATAGGCTATTTTGAGACAGGCATGCTTTTTCAGAATTCGAGCTCGTTTAAAC	2	YBL096C;YBL094C	2	YBL096C;YBL094C	0
YBL094C	YBL094C	2	38504	38836	-	GAATATAGAATATTAATTAACACGGAATAGGCTATTTTGAGACAGGCATG	ACAGCCTTGCAGTTACACCTCTTTTACTAGGCAACAAAGGGAAGCCACAA	AACGTCCATAAGGGCTTGTTGTCATTGTTGCTGGATGAAGCATTGTGCTA	GAATATAGAATATTAATTAACACGGAATAGGCTATTTTGAGACAGGCATGCGGATCCCCGGGTTAATTAA	ACAGCCTTGCAGTTACACCTCTTTTACTAGGCAACAAAGGGAAGCCACAACGGATCCCCGGGTTAATTAA	AACGTCCATAAGGGCTTGTTGTCATTGTTGCTGGATGAAGCATTGTGCTAGAATTCGAGCTCGTTTAAAC	1	YBL095W	1	YBL095W	0
YBL093C	ROX3,MED19,SSN7,NUT3	2	38995	39657	-	GAGTGCGAATAGCAATAGTAAGTGAACGAAAAAGGAATACGATAATAATG	CACCAACACATAGTGACAGTCATGAGGATATGAAAAGAAGGAGGCTGGAG	ACACTTGCTCTTTATTTATAGTGGGGCTGATATGCGATGGCGTAAAGCTA	GAGTGCGAATAGCAATAGTAAGTGAACGAAAAAGGAATACGATAATAATGCGGATCCCCGGGTTAATTAA	CACCAACACATAGTGACAGTCATGAGGATATGAAAAGAAGGAGGCTGGAGCGGATCCCCGGGTTAATTAA	ACACTTGCTCTTTATTTATAGTGGGGCTGATATGCGATGGCGTAAAGCTAGAATTCGAGCTCGTTTAAAC	0		0		0
YBL092W	RPL32	2	40718	41110	+	TATACTAACAAACTTTTAATTTTCATTTTTTTTTTTTTTTTGATTAGATG	CTTTGGGTATCAAGGTCACCAACCCAAAGGGTCGTTTGGCTTTGGAAGCT	AATTTAAAATTAAATGAAGGTTATTATTTTGTAAATCTTTATTTAATTTA	TATACTAACAAACTTTTAATTTTCATTTTTTTTTTTTTTTTGATTAGATGCGGATCCCCGGGTTAATTAA	CTTTGGGTATCAAGGTCACCAACCCAAAGGGTCGTTTGGCTTTGGAAGCTCGGATCCCCGGGTTAATTAA	AATTTAAAATTAAATGAAGGTTATTATTTTGTAAATCTTTATTTAATTTAGAATTCGAGCTCGTTTAAAC	0		0		0
YBL091C-A	SCS22	2	41305	41920	-	GTGGTATGACGACAGATAATATAAGCACTAGTTCAGACGAGTAAACAATG	CATTGCTTATCATCACCGTTATCGCATTGCTCGTCGGCTGGATATACTAC	AAAACTAGGGCATTCTTCCTCACTTTTAGTGATAAACTTTTGTAAACTCA	GTGGTATGACGACAGATAATATAAGCACTAGTTCAGACGAGTAAACAATGCGGATCCCCGGGTTAATTAA	CATTGCTTATCATCACCGTTATCGCATTGCTCGTCGGCTGGATATACTACCGGATCCCCGGGTTAATTAA	AAAACTAGGGCATTCTTCCTCACTTTTAGTGATAAACTTTTGTAAACTCAGAATTCGAGCTCGTTTAAAC	0		0		0
YBL091C	MAP2	2	42103	43368	-	GGGCTTTTACATCAACAAGTACTGTAGAAGCTCTACCGTATTGAAAAATG	TCTTGTTGCATGCTCACAAAAAGGAAGTCGTTTCGAAAGGTGATGACTAC	AGTATTCATATACCTAGTGAGGAGGCCATTTGAAAGCGCATTTTACCTCA	GGGCTTTTACATCAACAAGTACTGTAGAAGCTCTACCGTATTGAAAAATGCGGATCCCCGGGTTAATTAA	TCTTGTTGCATGCTCACAAAAAGGAAGTCGTTTCGAAAGGTGATGACTACCGGATCCCCGGGTTAATTAA	AGTATTCATATACCTAGTGAGGAGGCCATTTGAAAGCGCATTTTACCTCAGAATTCGAGCTCGTTTAAAC	0		0		0
YBL090W	MRP21,MRP50	2	43565	44098	+	GAAGAGTAAAAAATCTGTCAAATATCACCCATAAGAGCATAACCATAATG	GCTTCAAGAGGTTGATTGAAATTGTTAAAGATGCCAAGAGGAAAGGATAC	GAAATCAATGGCGAAAATTTCACAATATTCAAGAGTTGATGGTACGATTA	GAAGAGTAAAAAATCTGTCAAATATCACCCATAAGAGCATAACCATAATGCGGATCCCCGGGTTAATTAA	GCTTCAAGAGGTTGATTGAAATTGTTAAAGATGCCAAGAGGAAAGGATACCGGATCCCCGGGTTAATTAA	GAAATCAATGGCGAAAATTTCACAATATTCAAGAGTTGATGGTACGATTAGAATTCGAGCTCGTTTAAAC	0		0		0
YBL089W	AVT5	2	44314	45693	+	CGAACAGCAAGATAAAGTGGAAACGAAAAGTAAGCAGCTTCCTCAATATG	TAATGGTAGCTTCACTATCAGCGATTGTATTTTTGGGCACATCATCGCAT	ATACTTCTTTTTTTTGTTTATAGAAATACGAAAAGTAATGTACAAAGTCA	CGAACAGCAAGATAAAGTGGAAACGAAAAGTAAGCAGCTTCCTCAATATGCGGATCCCCGGGTTAATTAA	TAATGGTAGCTTCACTATCAGCGATTGTATTTTTGGGCACATCATCGCATCGGATCCCCGGGTTAATTAA	ATACTTCTTTTTTTTGTTTATAGAAATACGAAAAGTAATGTACAAAGTCAGAATTCGAGCTCGTTTAAAC	0		0		0
YBL088C	TEL1	2	45759	54121	-	GAAAAAAAAGCCTTCAAAGAAAAAGGGAAATCAGTGTAACATAGACGATG	CGGATCCATCAAATTTGAGTGTTATATATATGGGATGGTCACCTTTTTAT	GTATTTCTATAAACAAAAAAAAGAAGTATAAAGCATCTGCATAGCAATTA	GAAAAAAAAGCCTTCAAAGAAAAAGGGAAATCAGTGTAACATAGACGATGCGGATCCCCGGGTTAATTAA	CGGATCCATCAAATTTGAGTGTTATATATATGGGATGGTCACCTTTTTATCGGATCCCCGGGTTAATTAA	GTATTTCTATAAACAAAAAAAAGAAGTATAAAGCATCTGCATAGCAATTAGAATTCGAGCTCGTTTAAAC	0		0		0
YBL087C	RPL23A	2	54561	55478	-	GGGTCTTACAAGCAATACAAAACCAACACACCTATATATAACTAATAATG	AATGTGCCGATTTATGGCCAAGAGTTGCATCTAACTCCGGTGTTGTTGTG	ATATATAATTGAAGAATCTAAGAGTATGAGTCAAAATAATTTCCTTTTTA	GGGTCTTACAAGCAATACAAAACCAACACACCTATATATAACTAATAATGCGGATCCCCGGGTTAATTAA	AATGTGCCGATTTATGGCCAAGAGTTGCATCTAACTCCGGTGTTGTTGTGCGGATCCCCGGGTTAATTAA	ATATATAATTGAAGAATCTAAGAGTATGAGTCAAAATAATTTCCTTTTTAGAATTCGAGCTCGTTTAAAC	0		0		0
YBL086C	YBL086C	2	55944	57344	-	GTATTAGGTACCCAAGAAAGGTATAATACCGCTCACAAAATATTAAGATG	CAGATAGAATAAGAGAAAACAAAAACTGGTCTATAATAACCCCATCAGGC	GGTATTGCAAGCTTAAGATTATAACTACATAAAACAATACAATTTTTTTA	GTATTAGGTACCCAAGAAAGGTATAATACCGCTCACAAAATATTAAGATGCGGATCCCCGGGTTAATTAA	CAGATAGAATAAGAGAAAACAAAAACTGGTCTATAATAACCCCATCAGGCCGGATCCCCGGGTTAATTAA	GGTATTGCAAGCTTAAGATTATAACTACATAAAACAATACAATTTTTTTAGAATTCGAGCTCGTTTAAAC	0		0		0
YBL085W	BOI1,BOB1,GIN7	2	58617	61559	+	TCCAACTCGAGGTGACCGGAGGCCACTGCAATAATAAAAAATAGAAGATG	CCAGCGATTACCTGGAAAGTTCAGCATTTGAATACCCTGGTGGCAGACTT	TATTAAGGTGTTTGAGTTGGTCAAGAAGTAACTAATGATTGCAGTTCTCA	TCCAACTCGAGGTGACCGGAGGCCACTGCAATAATAAAAAATAGAAGATGCGGATCCCCGGGTTAATTAA	CCAGCGATTACCTGGAAAGTTCAGCATTTGAATACCCTGGTGGCAGACTTCGGATCCCCGGGTTAATTAA	TATTAAGGTGTTTGAGTTGGTCAAGAAGTAACTAATGATTGCAGTTCTCAGAATTCGAGCTCGTTTAAAC	0		0		0
YBL084C	CDC27,SNB1,APC3	2	61910	64145	-	CATAAATCGACACGAACTTTTCGTGCAGGATACATAATAAAAATAGCATG	AGGGTAACCAAGTTATCATCGATGAATTACAAAAATGTCATATGCAAGAA	AAAACATTTAACATGTTTCAATTTGTTATGTTTTGGCCAACCTGCGTTTA	CATAAATCGACACGAACTTTTCGTGCAGGATACATAATAAAAATAGCATGCGGATCCCCGGGTTAATTAA	AGGGTAACCAAGTTATCATCGATGAATTACAAAAATGTCATATGCAAGAACGGATCCCCGGGTTAATTAA	AAAACATTTAACATGTTTCAATTTGTTATGTTTTGGCCAACCTGCGTTTAGAATTCGAGCTCGTTTAAAC	0		0		0
YBL083C	YBL083C	2	64413	64838	-	CTCACCACACTGTTCGTCACAAGATACCCTCGCATCCTGCCCGATTTATG	AAAAAGCTCAACTGAAACAGATGTATAAATATCATATAATCGTATTGTTT	CACCATTAAATACTAGTAGTACTATATAGATGGTATAAAGAAATGATTTA	CTCACCACACTGTTCGTCACAAGATACCCTCGCATCCTGCCCGATTTATGCGGATCCCCGGGTTAATTAA	AAAAAGCTCAACTGAAACAGATGTATAAATATCATATAATCGTATTGTTTCGGATCCCCGGGTTAATTAA	CACCATTAAATACTAGTAGTACTATATAGATGGTATAAAGAAATGATTTAGAATTCGAGCTCGTTTAAAC	1	YBL082C	1	YBL082C	0
YBL082C	ALG3,RHK1	2	64451	65827	-	TATCATAGAGTGTATATGGGAGAGAGAAAGAGTTAGATACTAGTAGTATG	TCGCCAAAAGCCATCTTCGTACCACCAGCTCCATGGAAAAAAAGCTCAAC	AGAAATGATTTAAAACAATACGATTATATGATATTTATACATCTGTTTCA	TATCATAGAGTGTATATGGGAGAGAGAAAGAGTTAGATACTAGTAGTATGCGGATCCCCGGGTTAATTAA	TCGCCAAAAGCCATCTTCGTACCACCAGCTCCATGGAAAAAAAGCTCAACCGGATCCCCGGGTTAATTAA	AGAAATGATTTAAAACAATACGATTATATGATATTTATACATCTGTTTCAGAATTCGAGCTCGTTTAAAC	1	YBL083C	1	YBL083C	0
YBL081W	YBL081W	2	66565	67683	+	TAATTTTCTCTTTTTTTTTGGCTCTATTTCACTAAGACATCGTATATATG	CATCATCAAGACCCTTTGGCATTTGGAATACTGACATGAGCGTTTGGAGT	TAGTAATACTAATGATAATAATATACATAAAAATATACGTAAACATCTCA	TAATTTTCTCTTTTTTTTTGGCTCTATTTCACTAAGACATCGTATATATGCGGATCCCCGGGTTAATTAA	CATCATCAAGACCCTTTGGCATTTGGAATACTGACATGAGCGTTTGGAGTCGGATCCCCGGGTTAATTAA	TAGTAATACTAATGATAATAATATACATAAAAATATACGTAAACATCTCAGAATTCGAGCTCGTTTAAAC	0		0		0
YBL080C	PET112	2	67781	69406	-	GTTATTGTTAGCATTCCTGTCCAAAAAGACCAGAGTAGGAACTAGATATG	AGGCAAACGAATTCGAGAAAAAATTCAAAGAGATCTTAAATATTCAATGG	TTGTTATTATTTATGCACGGTTCCTATTTACACGCGGCGTTTATATTTTA	GTTATTGTTAGCATTCCTGTCCAAAAAGACCAGAGTAGGAACTAGATATGCGGATCCCCGGGTTAATTAA	AGGCAAACGAATTCGAGAAAAAATTCAAAGAGATCTTAAATATTCAATGGCGGATCCCCGGGTTAATTAA	TTGTTATTATTTATGCACGGTTCCTATTTACACGCGGCGTTTATATTTTAGAATTCGAGCTCGTTTAAAC	0		0		0
YBL079W	NUP170,NLE3	2	69971	74479	+	ACAAAAAAGCAGAGTGCGTTTATTACTTCTCTTTCTAGCGGTTGTTCATG	AGTACGTTAAGAACAGCGGCAATAATTTGGGGATTTGTTTCTACAAAGAA	AATATACACGTACATTACCCTGCTATCTATATGTCGAACATGAATTTTTA	ACAAAAAAGCAGAGTGCGTTTATTACTTCTCTTTCTAGCGGTTGTTCATGCGGATCCCCGGGTTAATTAA	AGTACGTTAAGAACAGCGGCAATAATTTGGGGATTTGTTTCTACAAAGAACGGATCCCCGGGTTAATTAA	AATATACACGTACATTACCCTGCTATCTATATGTCGAACATGAATTTTTAGAATTCGAGCTCGTTTAAAC	0		0		0
YBL078C	ATG8,AUT7,CVT5,APG8	2	75089	75442	-	AATAATTGTAAAGTTGAGAAAATCATAATAAAATAATTACTAGAGACATG	AGGACGGGTTTTTGTATGTCACTTACTCAGGAGAAAATACATTTGGCAGG	AATTTCGATTTTAGATGTTAACGCTTCATTTCTTTTCATATAAAAGACTA	AATAATTGTAAAGTTGAGAAAATCATAATAAAATAATTACTAGAGACATGCGGATCCCCGGGTTAATTAA	AGGACGGGTTTTTGTATGTCACTTACTCAGGAGAAAATACATTTGGCAGGCGGATCCCCGGGTTAATTAA	AATTTCGATTTTAGATGTTAACGCTTCATTTCTTTTCATATAAAAGACTAGAATTCGAGCTCGTTTAAAC	0		0		0
YBL077W	YBL077W	2	75608	76039	+	ATTTTTGCCGCCGCCGAAAATAACCGGCCTCCGGGTGATGATATATCATG	GGATTCTGTTGACCAGCTCTCTTGCGAGACCTTCACTCTTTAGTTCAGAG	GAAACCAGAACCGACCAAGACGTGTTAATCATCATGGATACAAATATTTA	ATTTTTGCCGCCGCCGAAAATAACCGGCCTCCGGGTGATGATATATCATGCGGATCCCCGGGTTAATTAA	GGATTCTGTTGACCAGCTCTCTTGCGAGACCTTCACTCTTTAGTTCAGAGCGGATCCCCGGGTTAATTAA	GAAACCAGAACCGACCAAGACGTGTTAATCATCATGGATACAAATATTTAGAATTCGAGCTCGTTTAAAC	1	YBL076C	1	YBL076C	0
YBL076C	ILS1	2	75754	78972	-	CGACTTCCTACAACCTTTAGCCAAAAGCTTCAAAAAACCAAGGAAATATG	AAGAACAATCTATTAATGACACCATTTTCAAATTAAAAGTGTTCAAATTA	ATCACTTCGAGTAGAGAAAAATTTGTACGTATTTATATGAGTTGTTTTCA	CGACTTCCTACAACCTTTAGCCAAAAGCTTCAAAAAACCAAGGAAATATGCGGATCCCCGGGTTAATTAA	AAGAACAATCTATTAATGACACCATTTTCAAATTAAAAGTGTTCAAATTACGGATCCCCGGGTTAATTAA	ATCACTTCGAGTAGAGAAAAATTTGTACGTATTTATATGAGTTGTTTTCAGAATTCGAGCTCGTTTAAAC	1	YBL077W	1	YBL077W	0
YBL075C	SSA3,YG106	2	79209	81158	-	GTTTGTCACTAAACGGATAGAACAGGTACTTAACGCTACAAAGAAAAATG	GTGCTACGGGAGGTGGAGAGGATACAGGTCCAACAGTGGAAGAGGTTGAT	AAGGTTAAACATAAAAAGTAGCTAAATAGAACACTATAGAAGAATAATCA	GTTTGTCACTAAACGGATAGAACAGGTACTTAACGCTACAAAGAAAAATGCGGATCCCCGGGTTAATTAA	GTGCTACGGGAGGTGGAGAGGATACAGGTCCAACAGTGGAAGAGGTTGATCGGATCCCCGGGTTAATTAA	AAGGTTAAACATAAAAAGTAGCTAAATAGAACACTATAGAAGAATAATCAGAATTCGAGCTCGTTTAAAC	0		0		0
YBL074C	AAR2	2	81432	82499	-	TTACCGCTGGGACATGGGGCTAAAAAACAAAATATCGGAAGCCTGCAATG	ATGATGAGCACAACCCTACCATTGTTGGCGGTCTCTATTACCAAAGGCCA	TAGGCATCAAGTCAAATACGTTTGGTGATAGCGCCGCACGATGATCGTTA	TTACCGCTGGGACATGGGGCTAAAAAACAAAATATCGGAAGCCTGCAATGCGGATCCCCGGGTTAATTAA	ATGATGAGCACAACCCTACCATTGTTGGCGGTCTCTATTACCAAAGGCCACGGATCCCCGGGTTAATTAA	TAGGCATCAAGTCAAATACGTTTGGTGATAGCGCCGCACGATGATCGTTAGAATTCGAGCTCGTTTAAAC	1	YBL073W	1	YBL073W	0
YBL073W	YBL073W	2	82356	82667	+	ATTCTACAGTCAAACCAGTAGCCATACCTCATGCTGGAATTATCTGCATG	CGATTTTTTCCGCTTTCAAGATGTGTCCTTTCTTCATCTCTTGGTTCTTA	GGGATGTGAAAAGGAAAAAGTAATTAGGAGGGGTTTGCGGCGCCCTTTTA	ATTCTACAGTCAAACCAGTAGCCATACCTCATGCTGGAATTATCTGCATGCGGATCCCCGGGTTAATTAA	CGATTTTTTCCGCTTTCAAGATGTGTCCTTTCTTCATCTCTTGGTTCTTACGGATCCCCGGGTTAATTAA	GGGATGTGAAAAGGAAAAAGTAATTAGGAGGGGTTTGCGGCGCCCTTTTAGAATTCGAGCTCGTTTAAAC	1	YBL074C	1	YBL074C	0
YBL072C	RPS8A	2	83229	83831	-	TTTATTTTACTAACAAGCGTCATTAAATTTTCTATTACAGTTACAAAATG	TGGAAGGTGAAGAATTAGCTTTCTACCTAAGAAGATTGACTGCTAAGAAA	TATGAAGAGATGAGGAGAAGAAAAAATTGGTAGTATTTTCATTTCATCTA	TTTATTTTACTAACAAGCGTCATTAAATTTTCTATTACAGTTACAAAATGCGGATCCCCGGGTTAATTAA	TGGAAGGTGAAGAATTAGCTTTCTACCTAAGAAGATTGACTGCTAAGAAACGGATCCCCGGGTTAATTAA	TATGAAGAGATGAGGAGAAGAAAAAATTGGTAGTATTTTCATTTCATCTAGAATTCGAGCTCGTTTAAAC	0		0		0
YBL071C-B	YBL071C-B	2	84163	84261	-	GGAAAGCTTGAGGGCTTTCTCTTACGCAGTGTTCATGGTGTTACGGGATG	TAGGAAATTACACTTGCCATTTGCTTTTTGGTACTCACAAGAAGACGTTA	TTCCATTACTCATATGACCATAGCACATACTTTTTGTCCTGGTGTGTTTA	GGAAAGCTTGAGGGCTTTCTCTTACGCAGTGTTCATGGTGTTACGGGATGCGGATCCCCGGGTTAATTAA	TAGGAAATTACACTTGCCATTTGCTTTTTGGTACTCACAAGAAGACGTTACGGATCCCCGGGTTAATTAA	TTCCATTACTCATATGACCATAGCACATACTTTTTGTCCTGGTGTGTTTAGAATTCGAGCTCGTTTAAAC	0		0		0
YBL071W-A	KTI11,DPH3	2	84683	84931	+	TACCACGACTGTAAGCACATCATTTGTACAATACATTACCAGCTGAAATG	ACTACGAAGAGGCAGGCATCCAACCCCCTGAGCCTATTGCCGCTGCTGCT	AGCTCTTTCTTTATTTCTATTTGTATTCTCGATCTAGCCTCTCATCTTTA	TACCACGACTGTAAGCACATCATTTGTACAATACATTACCAGCTGAAATGCGGATCCCCGGGTTAATTAA	ACTACGAAGAGGCAGGCATCCAACCCCCTGAGCCTATTGCCGCTGCTGCTCGGATCCCCGGGTTAATTAA	AGCTCTTTCTTTATTTCTATTTGTATTCTCGATCTAGCCTCTCATCTTTAGAATTCGAGCTCGTTTAAAC	1	YBL071C	1	YBL071C	0
YBL071C	YBL071C	2	84928	85236	-	AGAAAAATCCCTCGCCTTTCCGGTGAAATTTGTCACAGCCATTTGAGATG	ATAGCTCTTTCTTTATTTCTATTTGTATTCTCGATCTAGCCTCTCATCTT	TACGAAGAGGCAGGCATCCAACCCCCTGAGCCTATTGCCGCTGCTGCTTA	AGAAAAATCCCTCGCCTTTCCGGTGAAATTTGTCACAGCCATTTGAGATGCGGATCCCCGGGTTAATTAA	ATAGCTCTTTCTTTATTTCTATTTGTATTCTCGATCTAGCCTCTCATCTTCGGATCCCCGGGTTAATTAA	TACGAAGAGGCAGGCATCCAACCCCCTGAGCCTATTGCCGCTGCTGCTTAGAATTCGAGCTCGTTTAAAC	1	YBL071W-A	1	YBL071W-A	0
YBL070C	YBL070C	2	85310	85630	-	TGTTCTTAGGAATAGGCGTCTTGATCTTCTTTTCATAAGAAAAATCCATG	CTTTGATTATAATATGTACTTTTATATATTTTCTTTATTTTTCATTATTT	GGAAAGGCGAGGGATTTTTCTGTTGACATTATCAAATTAGCTTTTTGTCA	TGTTCTTAGGAATAGGCGTCTTGATCTTCTTTTCATAAGAAAAATCCATGCGGATCCCCGGGTTAATTAA	CTTTGATTATAATATGTACTTTTATATATTTTCTTTATTTTTCATTATTTCGGATCCCCGGGTTAATTAA	GGAAAGGCGAGGGATTTTTCTGTTGACATTATCAAATTAGCTTTTTGTCAGAATTCGAGCTCGTTTAAAC	1	YBL069W	1	YBL069W	0
YBL069W	AST1	2	85446	86735	+	GGAAGCTACAAATACGACATTCCATACCAAGAGGCAAACGTTGAACAATG	TGGCCACTCAACGTGCCCAAGGAAAGTTAATCATGAACGTCGAAAAATTC	GTTCATTAAGTTTAACAATAAAACATATTGTAAATGTAAGTGGGTATCTA	GGAAGCTACAAATACGACATTCCATACCAAGAGGCAAACGTTGAACAATGCGGATCCCCGGGTTAATTAA	TGGCCACTCAACGTGCCCAAGGAAAGTTAATCATGAACGTCGAAAAATTCCGGATCCCCGGGTTAATTAA	GTTCATTAAGTTTAACAATAAAACATATTGTAAATGTAAGTGGGTATCTAGAATTCGAGCTCGTTTAAAC	2	YBL070C;YBL068W-A	2	YBL070C;YBL068W-A	0
YBL068W-A	YBL068W-A	2	86499	86735	+	AAGACATTTTCGATTCATGGGATAACCCAAGTGCCAATGCAAGAAAAATG	TGGCCACTCAACGTGCCCAAGGAAAGTTAATCATGAACGTCGAAAAATTC	GTTCATTAAGTTTAACAATAAAACATATTGTAAATGTAAGTGGGTATCTA	AAGACATTTTCGATTCATGGGATAACCCAAGTGCCAATGCAAGAAAAATGCGGATCCCCGGGTTAATTAA	TGGCCACTCAACGTGCCCAAGGAAAGTTAATCATGAACGTCGAAAAATTCCGGATCCCCGGGTTAATTAA	GTTCATTAAGTTTAACAATAAAACATATTGTAAATGTAAGTGGGTATCTAGAATTCGAGCTCGTTTAAAC	1	YBL069W	1	YBL069W	0
YBL068W	PRS4	2	87119	88099	+	TGCACATAGACTCTCAGCTTCAACTCCAAAAGGCTTCTCCAGCAAAAATG	GACTACACAATGGTGAATCCGTGTCATATTTGTTCACCCATGCTCCAGTA	GTATTTAGGCATGCAAGCAATCAGGAATCTGAGAATAAAAAATTGTCCTA	TGCACATAGACTCTCAGCTTCAACTCCAAAAGGCTTCTCCAGCAAAAATGCGGATCCCCGGGTTAATTAA	GACTACACAATGGTGAATCCGTGTCATATTTGTTCACCCATGCTCCAGTACGGATCCCCGGGTTAATTAA	GTATTTAGGCATGCAAGCAATCAGGAATCTGAGAATAAAAAATTGTCCTAGAATTCGAGCTCGTTTAAAC	0		0		0
YBL067C	UBP13	2	88344	90587	-	CCAGTACTTTCATTAACATACTAAACCCACGCAAGAAGGGCGCAATCATG	CCATAAAGTCTTCTAAAAAAAAGTCGAGAATGTTTAGTTTTAGGAAAAGC	TTAAAGGAGACGGTGAACCTTTACCTTCCTTGATATGCAAATATTTTTCA	CCAGTACTTTCATTAACATACTAAACCCACGCAAGAAGGGCGCAATCATGCGGATCCCCGGGTTAATTAA	CCATAAAGTCTTCTAAAAAAAAGTCGAGAATGTTTAGTTTTAGGAAAAGCCGGATCCCCGGGTTAATTAA	TTAAAGGAGACGGTGAACCTTTACCTTCCTTGATATGCAAATATTTTTCAGAATTCGAGCTCGTTTAAAC	0		0		0
YBL066C	SEF1	2	91372	94818	-	GGTCCCGTATACAGATTATATTGGCTCTGCGTATACGCATTCTCGTCATG	GTAATGATGACTTTTTTGGTTGGTTCGATATGAACATGGAACAAGGTTTT	AAAACAAGGGTAATAATATTTCTTAGAATATTAGAAGAATATGGGCGTTA	GGTCCCGTATACAGATTATATTGGCTCTGCGTATACGCATTCTCGTCATGCGGATCCCCGGGTTAATTAA	GTAATGATGACTTTTTTGGTTGGTTCGATATGAACATGGAACAAGGTTTTCGGATCCCCGGGTTAATTAA	AAAACAAGGGTAATAATATTTCTTAGAATATTAGAAGAATATGGGCGTTAGAATTCGAGCTCGTTTAAAC	1	YBL065W	1	YBL065W	0
YBL065W	YBL065W	2	94666	95010	+	CATTTGATTTTGTGCTGTCTACAATGTGTACATGAGGTAACTGGTCTATG	ATCCAATGAGCGGCCCTTCGTACGAGATGAGATATAATAAAAATGAAAGA	CTTTACTATATACAGGTATATGAAGTATCTCTAACTAAAACTTTTATCTA	CATTTGATTTTGTGCTGTCTACAATGTGTACATGAGGTAACTGGTCTATGCGGATCCCCGGGTTAATTAA	ATCCAATGAGCGGCCCTTCGTACGAGATGAGATATAATAAAAATGAAAGACGGATCCCCGGGTTAATTAA	CTTTACTATATACAGGTATATGAAGTATCTCTAACTAAAACTTTTATCTAGAATTCGAGCTCGTTTAAAC	1	YBL066C	1	YBL066C	0
YBL064C	PRX1	2	95074	95859	-	TTCTCGCAGTAGGATGAGATAAATTTCAAAGAAGCAGGAAGCAAAGGATG	TTGGTCAATTCAATGAAATTAAACCCTATTTAAGATTCACCAAGTCGAAA	GAGATACTTCATATACCTGTATATAGTAAAGTCGTTTATTTCATAGCTTA	TTCTCGCAGTAGGATGAGATAAATTTCAAAGAAGCAGGAAGCAAAGGATGCGGATCCCCGGGTTAATTAA	TTGGTCAATTCAATGAAATTAAACCCTATTTAAGATTCACCAAGTCGAAACGGATCCCCGGGTTAATTAA	GAGATACTTCATATACCTGTATATAGTAAAGTCGTTTATTTCATAGCTTAGAATTCGAGCTCGTTTAAAC	0		0		0
YBL063W	KIP1,CIN9	2	96591	99926	+	ACAGTTCGCGCTTCCCTCACTAAATATGGCGAGATAGTTAAACAATCATG	GAGAAGAAACTGAAAATAATGACATACTGCAAAATAAAAAACTTCATCAA	ACTCAATGCATATAGTGATACAAATATTTTACAATGGCTATATCCCCTTA	ACAGTTCGCGCTTCCCTCACTAAATATGGCGAGATAGTTAAACAATCATGCGGATCCCCGGGTTAATTAA	GAGAAGAAACTGAAAATAATGACATACTGCAAAATAAAAAACTTCATCAACGGATCCCCGGGTTAATTAA	ACTCAATGCATATAGTGATACAAATATTTTACAATGGCTATATCCCCTTAGAATTCGAGCTCGTTTAAAC	0		0		0
YBL062W	YBL062W	2	100013	100393	+	CATTGAGTGTAAACTGTTGCACCTATAAGGAATGAAAACAATCTAGTATG	ATGTTTCAGATTTTGAAGAAACTCTTGAATTTGACCCTACGTTACTTGTT	AAAAATAAAAGTATCAGTACTTTGAATTTATTCTCTACTGTGGACAGTCA	CATTGAGTGTAAACTGTTGCACCTATAAGGAATGAAAACAATCTAGTATGCGGATCCCCGGGTTAATTAA	ATGTTTCAGATTTTGAAGAAACTCTTGAATTTGACCCTACGTTACTTGTTCGGATCCCCGGGTTAATTAA	AAAAATAAAAGTATCAGTACTTTGAATTTATTCTCTACTGTGGACAGTCAGAATTCGAGCTCGTTTAAAC	1	YBL061C	1	YBL061C	0
YBL061C	SKT5,CSD4,CHS4,CAL2	2	100021	102111	-	AGGTTCTCGTCTTTTATGGTGATAAAGTTAAAATAGAAGGATAAAAAATG	AGAACAAGAAGGATAAACAAGGTAAAAAAAAAAAAGACTGTGTAATTATG	GTAAACTGTTGCACCTATAAGGAATGAAAACAATCTAGTATGTGTACCTA	AGGTTCTCGTCTTTTATGGTGATAAAGTTAAAATAGAAGGATAAAAAATGCGGATCCCCGGGTTAATTAA	AGAACAAGAAGGATAAACAAGGTAAAAAAAAAAAAGACTGTGTAATTATGCGGATCCCCGGGTTAATTAA	GTAAACTGTTGCACCTATAAGGAATGAAAACAATCTAGTATGTGTACCTAGAATTCGAGCTCGTTTAAAC	1	YBL062W	1	YBL062W	0
YBL060W	YEL1	2	102637	104700	+	GTACAATTTTGTGCAGTCAATGGACTATTAAGCGATCGCAAAGAGGTATG	GACTGAGCTACTTGAAAGCTTTGCAAAAAGCCATGGGTTCTGTTCAGTTC	TTTATATTTCTTCACCGCAGTCTTTATATTTATATCTTTAAATATACTTA	GTACAATTTTGTGCAGTCAATGGACTATTAAGCGATCGCAAAGAGGTATGCGGATCCCCGGGTTAATTAA	GACTGAGCTACTTGAAAGCTTTGCAAAAAGCCATGGGTTCTGTTCAGTTCCGGATCCCCGGGTTAATTAA	TTTATATTTCTTCACCGCAGTCTTTATATTTATATCTTTAAATATACTTAGAATTCGAGCTCGTTTAAAC	0		0		0
YBL059C-A	YBL059C-A	2	104829	105243	-	TTTACAAGTGCAGTTGAACAAAAGCAAGATAAGACAGGTACTACAACATG	GACAGTACGCCAAGAAAAAGCAGGCGAGTGACAATGATGCGAACTCGAAA	GATATTGAGATGATTTGTGTGAATGAAGTAGCGACAGAAAAAAGCTTTTA	TTTACAAGTGCAGTTGAACAAAAGCAAGATAAGACAGGTACTACAACATGCGGATCCCCGGGTTAATTAA	GACAGTACGCCAAGAAAAAGCAGGCGAGTGACAATGATGCGAACTCGAAACGGATCCCCGGGTTAATTAA	GATATTGAGATGATTTGTGTGAATGAAGTAGCGACAGAAAAAAGCTTTTAGAATTCGAGCTCGTTTAAAC	0		0		0
YBL059W	YBL059W	2	105298	105948	+	TACCTGTCTTATCTTGCTTTTGTTCAACTGCACTTGTAAATCAGTGAATG	AGCAAGTAGTGGACAGCTTAGTTAAGACACACAATTCATCTCTTTGTAAA	ATAGAAGTAGTGGAATATATTATTGAAACTACTACTATGGTATAACACTA	TACCTGTCTTATCTTGCTTTTGTTCAACTGCACTTGTAAATCAGTGAATGCGGATCCCCGGGTTAATTAA	AGCAAGTAGTGGACAGCTTAGTTAAGACACACAATTCATCTCTTTGTAAACGGATCCCCGGGTTAATTAA	ATAGAAGTAGTGGAATATATTATTGAAACTACTACTATGGTATAACACTAGAATTCGAGCTCGTTTAAAC	0		0		0
YBL058W	SHP1,UBX1	2	106139	107412	+	ATATATAAGAAACGTCGGTAGCACAACAATTAACTCATTATTTAGGTATG	CATTGAAGGACGCTGATCTGCTGAACTCAGTTGTCGTGCAAAGATGGGCA	ATATTAAGTTGAAGTCTTTTCCCGTTTCTGTTTTTGTATATTTATGCTCA	ATATATAAGAAACGTCGGTAGCACAACAATTAACTCATTATTTAGGTATGCGGATCCCCGGGTTAATTAA	CATTGAAGGACGCTGATCTGCTGAACTCAGTTGTCGTGCAAAGATGGGCACGGATCCCCGGGTTAATTAA	ATATTAAGTTGAAGTCTTTTCCCGTTTCTGTTTTTGTATATTTATGCTCAGAATTCGAGCTCGTTTAAAC	0		0		0
YBL057C	PTH2	2	107505	108148	-	AAGAGCTAATTGTTTCTTGCTATATTACTTGTTGACAGCAGAGTAACATG	CTGCTCCAAAAGCAGTATTGGATCAAATAACAGGTGATTTGAAATTGTAT	ATATAAATGCACGTATATCTATACCCGTAGTATATATCATTTGTACCTCA	AAGAGCTAATTGTTTCTTGCTATATTACTTGTTGACAGCAGAGTAACATGCGGATCCCCGGGTTAATTAA	CTGCTCCAAAAGCAGTATTGGATCAAATAACAGGTGATTTGAAATTGTATCGGATCCCCGGGTTAATTAA	ATATAAATGCACGTATATCTATACCCGTAGTATATATCATTTGTACCTCAGAATTCGAGCTCGTTTAAAC	0		0		0
YBL056W	PTC3	2	108466	109872	+	CAGACGAAGAAGGCCAAGAAGACAAATCGAAGAAAGAGAGAGATAACATG	ACGGCAAGAATGAAAATGCGAAGAAGGGTTCCAAGATTGAAGAAATTGAA	AAAGTTTGACTACCCTTTCGTTGCAAAGTACGGTTCGACAATATTTATTA	CAGACGAAGAAGGCCAAGAAGACAAATCGAAGAAAGAGAGAGATAACATGCGGATCCCCGGGTTAATTAA	ACGGCAAGAATGAAAATGCGAAGAAGGGTTCCAAGATTGAAGAAATTGAACGGATCCCCGGGTTAATTAA	AAAGTTTGACTACCCTTTCGTTGCAAAGTACGGTTCGACAATATTTATTAGAATTCGAGCTCGTTTAAAC	0		0		0
YBL055C	YBL055C	2	110274	111530	-	TTTCGCTGCCAAGGCATTTTTTGAGGTGACAGTACTGTTATAGTCATATG	CCACTTTGATAGATACCACGTGGAAGACGACCTGTAAGATATTTGGAGAG	TGTACTTACTAAAAATAATGTAACTTTGCTCTTTGCACCAATAGATGTTA	TTTCGCTGCCAAGGCATTTTTTGAGGTGACAGTACTGTTATAGTCATATGCGGATCCCCGGGTTAATTAA	CCACTTTGATAGATACCACGTGGAAGACGACCTGTAAGATATTTGGAGAGCGGATCCCCGGGTTAATTAA	TGTACTTACTAAAAATAATGTAACTTTGCTCTTTGCACCAATAGATGTTAGAATTCGAGCTCGTTTAAAC	0		0		0
YBL054W	YBL054W	2	112287	113864	+	TGGGTAGAGAAAAGAATATATCACTGTTCTTATGAAGTTCCCTCGCGATG	ATGAGCAAGATGAACTTCCAGGTATAAATTCTATCTTTAAAAATATATTT	GTACTCATTAAACGAATAGTCAAAACAAACTAAATTCGTCTCTTAGCTTA	TGGGTAGAGAAAAGAATATATCACTGTTCTTATGAAGTTCCCTCGCGATGCGGATCCCCGGGTTAATTAA	ATGAGCAAGATGAACTTCCAGGTATAAATTCTATCTTTAAAAATATATTTCGGATCCCCGGGTTAATTAA	GTACTCATTAAACGAATAGTCAAAACAAACTAAATTCGTCTCTTAGCTTAGAATTCGAGCTCGTTTAAAC	0		0		0
YBL053W	YBL053W	2	114033	114407	+	GAATTCTGTAATACTATTGACTACAAGGGTTCTTATTGCTATTAATAATG	CTTCATCCTGCTCTAAACTTGATATTCCAGTATCGTTTCTCCTAGCTGCA	TGGGAGCTCTGCTTCACTATTAAAAACTCCGAAACACCACTTGGAAATCA	GAATTCTGTAATACTATTGACTACAAGGGTTCTTATTGCTATTAATAATGCGGATCCCCGGGTTAATTAA	CTTCATCCTGCTCTAAACTTGATATTCCAGTATCGTTTCTCCTAGCTGCACGGATCCCCGGGTTAATTAA	TGGGAGCTCTGCTTCACTATTAAAAACTCCGAAACACCACTTGGAAATCAGAATTCGAGCTCGTTTAAAC	1	YBL052C	1	YBL052C	0
YBL052C	SAS3	2	114077	116572	-	TCTCTTCTTCCTTTTTCATTAATTAGTCTCCGTATAATTTGCAGATAATG	AGAGAGTCAGAAAAAGAAGAAAAATAACTCTAATAGAGGATGACGAAGAA	ATAATGTTACATGTATATGCTTATATCCAATATATACCCATCGCCGCTTA	TCTCTTCTTCCTTTTTCATTAATTAGTCTCCGTATAATTTGCAGATAATGCGGATCCCCGGGTTAATTAA	AGAGAGTCAGAAAAAGAAGAAAAATAACTCTAATAGAGGATGACGAAGAACGGATCCCCGGGTTAATTAA	ATAATGTTACATGTATATGCTTATATCCAATATATACCCATCGCCGCTTAGAATTCGAGCTCGTTTAAAC	1	YBL053W	1	YBL053W	0
YBL051C	PIN4,MDT1	2	117447	119453	-	AGAGGCAGGCTACAGACTAGGGAAAGCGTGTTCAACAACAATAAGAAATG	GTTCTTTAAGCGGACTGGATTTACAAAACCAAAACAAGAAGAATCTATGG	ACAAATACCAAACAAACTCTATAATCATAGAATAATGGAAGTATATATTA	AGAGGCAGGCTACAGACTAGGGAAAGCGTGTTCAACAACAATAAGAAATGCGGATCCCCGGGTTAATTAA	GTTCTTTAAGCGGACTGGATTTACAAAACCAAAACAAGAAGAATCTATGGCGGATCCCCGGGTTAATTAA	ACAAATACCAAACAAACTCTATAATCATAGAATAATGGAAGTATATATTAGAATTCGAGCTCGTTTAAAC	0		0		0
YBL050W	SEC17	2	119819	120813	+	GACTCGAGAATATAGTAAGAACACCATCATTAACCTGAAAGTTAAAAATG	TTTTGAATAAAATTAAGGAGTCCATCCAGCAACAAGAAGATGATTTGTTA	TTTATAATATATATGTATATATGTATGTGCGCGTAAATATATGCCGTTCA	GACTCGAGAATATAGTAAGAACACCATCATTAACCTGAAAGTTAAAAATGCGGATCCCCGGGTTAATTAA	TTTTGAATAAAATTAAGGAGTCCATCCAGCAACAAGAAGATGATTTGTTACGGATCCCCGGGTTAATTAA	TTTATAATATATATGTATATATGTATGTGCGCGTAAATATATGCCGTTCAGAATTCGAGCTCGTTTAAAC	0		0		0
YBL049W	MOH1	2	121521	121937	+	AGCAGCACTGAAGGAAAAGGGAGAAGCTTATCTTACTGTAGAAGAAAATG	ATAAGGAAGGAAAGTTTATCTTAGAGCTGAAAAACATTTGTAAATGTACT	AAAGCACTAAAAGACGAGAGGTGCTAGATAGCAGACAAAGGAAGACATCA	AGCAGCACTGAAGGAAAAGGGAGAAGCTTATCTTACTGTAGAAGAAAATGCGGATCCCCGGGTTAATTAA	ATAAGGAAGGAAAGTTTATCTTAGAGCTGAAAAACATTTGTAAATGTACTCGGATCCCCGGGTTAATTAA	AAAGCACTAAAAGACGAGAGGTGCTAGATAGCAGACAAAGGAAGACATCAGAATTCGAGCTCGTTTAAAC	0		0		0
YBL048W	YBL048W	2	121992	122303	+	CTTTGTCTGCTATCTAGCACCTCTCGTCTTTTAGTGCTTTTTAGCGTATG	TCTTACTTTACTTTTTTTGTATTTTCAATAATGTCGTGTTTCCCATGTTG	ACACTAACCAAAAAAAAAAAAGCTCTACCACACAATCCTTGGGCGTATTA	CTTTGTCTGCTATCTAGCACCTCTCGTCTTTTAGTGCTTTTTAGCGTATGCGGATCCCCGGGTTAATTAA	TCTTACTTTACTTTTTTTGTATTTTCAATAATGTCGTGTTTCCCATGTTGCGGATCCCCGGGTTAATTAA	ACACTAACCAAAAAAAAAAAAGCTCTACCACACAATCCTTGGGCGTATTAGAATTCGAGCTCGTTTAAAC	0		0		0
YBL047C	EDE1,BUD15	2	122587	126732	-	CCTGTTTTTATCTGTGTGTTTTCAATAGGATTCGAACGATATAGGCCATG	AGTGCAACTGGGATCTAGAAGCCGCCACTAACTTTTTGTTGGATAGTGCT	GCTTCGAGGAAGAAGTACAAAAAGAAGACGAAATGGTCCATTACAGACTA	CCTGTTTTTATCTGTGTGTTTTCAATAGGATTCGAACGATATAGGCCATGCGGATCCCCGGGTTAATTAA	AGTGCAACTGGGATCTAGAAGCCGCCACTAACTTTTTGTTGGATAGTGCTCGGATCCCCGGGTTAATTAA	GCTTCGAGGAAGAAGTACAAAAAGAAGACGAAATGGTCCATTACAGACTAGAATTCGAGCTCGTTTAAAC	0		0		0
YBL046W	PSY4	2	127116	128468	+	ATTTTTTGTTGGTGTTCTCATCGATTGTCAAAGCACAATAAAAAGCTATG	GTATTACCTACCGTGAGAATATTAGCAGTCCATTAGGCAAGAAGTCCAGA	TGATATTATGCAAATGGAAAGTTGTTGGTAGAGAAGTCATCTCTCGATCA	ATTTTTTGTTGGTGTTCTCATCGATTGTCAAAGCACAATAAAAAGCTATGCGGATCCCCGGGTTAATTAA	GTATTACCTACCGTGAGAATATTAGCAGTCCATTAGGCAAGAAGTCCAGACGGATCCCCGGGTTAATTAA	TGATATTATGCAAATGGAAAGTTGTTGGTAGAGAAGTCATCTCTCGATCAGAATTCGAGCTCGTTTAAAC	0		0		0
YBL045C	COR1,QCR1	2	128855	130228	-	TCACCATATCACTGAGAAAGAAAACACAAGATATATAAACAAAAAAAATG	GGTTATTAGATTACATGAGAATCAGAAGTGACATGTCCATGATGAGATGG	TTGCTTATTTCTATTTTATGTGCATGGAAAATATATTATCACACATCTTA	TCACCATATCACTGAGAAAGAAAACACAAGATATATAAACAAAAAAAATGCGGATCCCCGGGTTAATTAA	GGTTATTAGATTACATGAGAATCAGAAGTGACATGTCCATGATGAGATGGCGGATCCCCGGGTTAATTAA	TTGCTTATTTCTATTTTATGTGCATGGAAAATATATTATCACACATCTTAGAATTCGAGCTCGTTTAAAC	0		0		0
YBL044W	YBL044W	2	130710	131080	+	GAATATCTGGTTTTAAAATCACTCTTTTCTTTTTCCCCCTGGTGGGTATG	GGGTCAGAAACTTCGAGGAAGCTGTGACAATTGGAAAAAAAAGGCAAAAC	ATCCGAAAACATCACAAATAATGCATGGGCAACCGGATACATTGCATTTA	GAATATCTGGTTTTAAAATCACTCTTTTCTTTTTCCCCCTGGTGGGTATGCGGATCCCCGGGTTAATTAA	GGGTCAGAAACTTCGAGGAAGCTGTGACAATTGGAAAAAAAAGGCAAAACCGGATCCCCGGGTTAATTAA	ATCCGAAAACATCACAAATAATGCATGGGCAACCGGATACATTGCATTTAGAATTCGAGCTCGTTTAAAC	0		0		0
YBL043W	ECM13	2	131398	132171	+	TATTTATTGTTTTTCTCACATAGAAAATTCCGCATACTGCGATTATAATG	ACGATGGTTCCGTACCATTAACGAGATTTCATTCTTGTCCTATCACAGCA	GAATATGATAATGCAAAACGAAGTTGTGTTATTTCCTTCATTTTAATTTA	TATTTATTGTTTTTCTCACATAGAAAATTCCGCATACTGCGATTATAATGCGGATCCCCGGGTTAATTAA	ACGATGGTTCCGTACCATTAACGAGATTTCATTCTTGTCCTATCACAGCACGGATCCCCGGGTTAATTAA	GAATATGATAATGCAAAACGAAGTTGTGTTATTTCCTTCATTTTAATTTAGAATTCGAGCTCGTTTAAAC	0		0		0
YBL042C	FUI1	2	133039	134958	-	AAAGGCGGTAACTAGTCCTCTCATTCATTAATTCTATATAAGAGAAAATG	TTGAAGAATATGGCGGCGTTTCCACTGGCTATGAAAAGATACGATATGTC	TTGACATTATCATGATAAGGTGCTACTTGCGTTGTTAACAGTTGTGTTTA	AAAGGCGGTAACTAGTCCTCTCATTCATTAATTCTATATAAGAGAAAATGCGGATCCCCGGGTTAATTAA	TTGAAGAATATGGCGGCGTTTCCACTGGCTATGAAAAGATACGATATGTCCGGATCCCCGGGTTAATTAA	TTGACATTATCATGATAAGGTGCTACTTGCGTTGTTAACAGTTGTGTTTAGAATTCGAGCTCGTTTAAAC	0		0		0
YBL041W	PRE7,PRS3	2	135945	136670	+	TGGAAAGGGAGTAGCTAAGACTATTGAACTATAAAGTTAAACAAAATATG	TTGTCACCAAGGATGGTGTAAGGAAAGAATTTTATGAGCTAAAAAGAGAT	TGATGTTGATATTGGTCTATTTCTTTTTATACAATGATATGTATGCATTA	TGGAAAGGGAGTAGCTAAGACTATTGAACTATAAAGTTAAACAAAATATGCGGATCCCCGGGTTAATTAA	TTGTCACCAAGGATGGTGTAAGGAAAGAATTTTATGAGCTAAAAAGAGATCGGATCCCCGGGTTAATTAA	TGATGTTGATATTGGTCTATTTCTTTTTATACAATGATATGTATGCATTAGAATTCGAGCTCGTTTAAAC	0		0		0
YBL040C	ERD2	2	136810	137567	-	GTTCAAGAGTGAGATATACGCGCAAGTTGAGGCATAATCAGTAAGCAATG	CATTTACTACACTAAAGTCATCAGAGGAAAAGGTTTCAAACTGCCAAAAT	AAATTTGTATATATTGCTGCGAACACTATTTAAAACAGGTTTTTTTTTTT	GTTCAAGAGTGAGATATACGCGCAAGTTGAGGCATAATCAGTAAGCAATGCGGATCCCCGGGTTAATTAA	CATTTACTACACTAAAGTCATCAGAGGAAAAGGTTTCAAACTGCCAAAATCGGATCCCCGGGTTAATTAA	AAATTTGTATATATTGCTGCGAACACTATTTAAAACAGGTTTTTTTTTTTGAATTCGAGCTCGTTTAAAC	0		0		0
YBL039W-B	YBL039W-B	2	138092	138271	+	GTAGCGTGGATAACAATTTACTTTAATCAATCGTTAGGATACTTCTAATG	CATCACCTACAATCGACTTCAACTCGAAGAGTAAGAAAAAAAATGATAAA	AAATAACTTTCCATGGCGTGCTTTTACCAAAGTACTGAACAGGGAGATTA	GTAGCGTGGATAACAATTTACTTTAATCAATCGTTAGGATACTTCTAATGCGGATCCCCGGGTTAATTAA	CATCACCTACAATCGACTTCAACTCGAAGAGTAAGAAAAAAAATGATAAACGGATCCCCGGGTTAATTAA	AAATAACTTTCCATGGCGTGCTTTTACCAAAGTACTGAACAGGGAGATTAGAATTCGAGCTCGTTTAAAC	0		0		0
YBL039C	URA7	2	138688	140427	-	TTCTCAGTGAATTGGTCAATAGAAAAAAAGAAACTTATAGACAGAAAATG	TCATTGAAGGTAAGTACGATCTTGAGGCCGGCGAAAACAAATTCAACTTT	AATTTATCTTTGTTAATGCAGTAGACTTTTAATTCTAAAATTTTGATTTA	TTCTCAGTGAATTGGTCAATAGAAAAAAAGAAACTTATAGACAGAAAATGCGGATCCCCGGGTTAATTAA	TCATTGAAGGTAAGTACGATCTTGAGGCCGGCGAAAACAAATTCAACTTTCGGATCCCCGGGTTAATTAA	AATTTATCTTTGTTAATGCAGTAGACTTTTAATTCTAAAATTTTGATTTAGAATTCGAGCTCGTTTAAAC	1	YBL039C-A	1	YBL039C-A	0
YBL039C-A	YBL039C-A	2	139647	139730	-	TGAAATTTTGGATAAACCAACAATCGATAAGATTGCCATGTTTTGTCATG	CGATGTTAACTCTACTTATCACGTCCCATTGTTGCTACTGGAACAAAAGA	TGTAAGTGATATTTCATCTAACTTTAATCTGGCGTGCAAGTAATCAATCA	TGAAATTTTGGATAAACCAACAATCGATAAGATTGCCATGTTTTGTCATGCGGATCCCCGGGTTAATTAA	CGATGTTAACTCTACTTATCACGTCCCATTGTTGCTACTGGAACAAAAGACGGATCCCCGGGTTAATTAA	TGTAAGTGATATTTCATCTAACTTTAATCTGGCGTGCAAGTAATCAATCAGAATTCGAGCTCGTTTAAAC	1	YBL039C	1	YBL039C	0
YBL038W	MRPL16	2	140886	141584	+	AGTTGATTACCTTTCACCAGAGGTACAGAAGAATAGAATTTTGCAACATG	TGAATATTTTAAAGTCTCAAGAACCACAGTACAAACTCTTCAGAGGACGT	TATTTTTCAATAGTTATATACATGTATACATGGTGTGTTCAGTCCGTTCA	AGTTGATTACCTTTCACCAGAGGTACAGAAGAATAGAATTTTGCAACATGCGGATCCCCGGGTTAATTAA	TGAATATTTTAAAGTCTCAAGAACCACAGTACAAACTCTTCAGAGGACGTCGGATCCCCGGGTTAATTAA	TATTTTTCAATAGTTATATACATGTATACATGGTGTGTTCAGTCCGTTCAGAATTCGAGCTCGTTTAAAC	0		0		0
YBL037W	APL3	2	141908	144985	+	GAGTTTCCAATTTCGCAACCTTTATTATAGTACTATTCTTATAAGCCATG	GTCCCCTGGCGAAGTACATTGTCGAATGTATAAAGAATGTGCTTACGAAG	ATATGTACAATGCGGATGATTTTCATTATAGTGAATTCGAGAAAATTTTA	GAGTTTCCAATTTCGCAACCTTTATTATAGTACTATTCTTATAAGCCATGCGGATCCCCGGGTTAATTAA	GTCCCCTGGCGAAGTACATTGTCGAATGTATAAAGAATGTGCTTACGAAGCGGATCCCCGGGTTAATTAA	ATATGTACAATGCGGATGATTTTCATTATAGTGAATTCGAGAAAATTTTAGAATTCGAGCTCGTTTAAAC	0		0		0
YBL036C	YBL036C	2	145151	145923	-	GCATCACTCTTTCCTTTTTGACTAAGATTCCAGCATCACATTGCAATATG	GTACCGAAATTTTTGGTGCTAGACCTCCAAAAAACGAAGCTAGAATCATT	GCTATAAAAAAAAGATCTTCGTATAAAATCTCAGTTCATTCAACCTACTA	GCATCACTCTTTCCTTTTTGACTAAGATTCCAGCATCACATTGCAATATGCGGATCCCCGGGTTAATTAA	GTACCGAAATTTTTGGTGCTAGACCTCCAAAAAACGAAGCTAGAATCATTCGGATCCCCGGGTTAATTAA	GCTATAAAAAAAAGATCTTCGTATAAAATCTCAGTTCATTCAACCTACTAGAATTCGAGCTCGTTTAAAC	0		0		0
YBL035C	POL12	2	146197	148314	-	ACCTTGAAAGTAAATTTAGGCAGGAGCAAGTGACTGAAAAAAAAAAAATG	TTTATCTACACAACGTGTGGAAGCGCGCTAGAGTTGACTTGATTGCTAGT	TGGTGCTACCTTGAGCTATTCCATTAGTTAAGTTTGAATTAAATATATCA	ACCTTGAAAGTAAATTTAGGCAGGAGCAAGTGACTGAAAAAAAAAAAATGCGGATCCCCGGGTTAATTAA	TTTATCTACACAACGTGTGGAAGCGCGCTAGAGTTGACTTGATTGCTAGTCGGATCCCCGGGTTAATTAA	TGGTGCTACCTTGAGCTATTCCATTAGTTAAGTTTGAATTAAATATATCAGAATTCGAGCTCGTTTAAAC	0		0		0
YBL034C	STU1	2	148551	153092	-	CGGTAATTATTAGGGTTTTTGGAGAGACCTTGTATTCTTCAGAAATAATG	GTTTGCCTAAGAATGTCTTTAAAATGATCATGTTCATCGCCTCAAACGAA	GAGACGCGTCACGGTAAAAAAAAATTACGCGTCTACCACGCTATTCTCTA	CGGTAATTATTAGGGTTTTTGGAGAGACCTTGTATTCTTCAGAAATAATGCGGATCCCCGGGTTAATTAA	GTTTGCCTAAGAATGTCTTTAAAATGATCATGTTCATCGCCTCAAACGAACGGATCCCCGGGTTAATTAA	GAGACGCGTCACGGTAAAAAAAAATTACGCGTCTACCACGCTATTCTCTAGAATTCGAGCTCGTTTAAAC	0		0		0
YBL033C	RIB1	2	153359	154396	-	AGTCATTACAAAAAGTGGCGTACATAAAACTACAACAAACCTACAGGATG	ATCAAAACCGTATGAACTCTGCGTTGTCATCAACATCGACGCTGGCAATA	TTACAAAAAAAGCACTATATGTACTAATAATTATGCTACACTTGTGTTTA	AGTCATTACAAAAAGTGGCGTACATAAAACTACAACAAACCTACAGGATGCGGATCCCCGGGTTAATTAA	ATCAAAACCGTATGAACTCTGCGTTGTCATCAACATCGACGCTGGCAATACGGATCCCCGGGTTAATTAA	TTACAAAAAAAGCACTATATGTACTAATAATTATGCTACACTTGTGTTTAGAATTCGAGCTCGTTTAAAC	0		0		0
YBL032W	HEK2,KHD1	2	154887	156032	+	TCAACTGATCGGGTAACTTAGAGACAGCATTAGTATATATACCAGCCATG	AAGAGAAGGAAGAACCTCAAGAGAATCATGATAACAAAGAGGAGCAGTCG	GATAGTTTGTTTTGTCTGTGTGGGACGTGCGCACGCACACGTATATACTA	TCAACTGATCGGGTAACTTAGAGACAGCATTAGTATATATACCAGCCATGCGGATCCCCGGGTTAATTAA	AAGAGAAGGAAGAACCTCAAGAGAATCATGATAACAAAGAGGAGCAGTCGCGGATCCCCGGGTTAATTAA	GATAGTTTGTTTTGTCTGTGTGGGACGTGCGCACGCACACGTATATACTAGAATTCGAGCTCGTTTAAAC	0		0		0
YBL031W	SHE1	2	156401	157417	+	ACAATAAACATGCAATTACAGCTCTAGAACACATACTATCTTCATGGATG	TTAAGCAAAGTACTGCCGCCGGCACAAAGAGTGATAGACCTATTTGGCGG	GTCATCACATGATGTTTCTTATAAAATGCAATTTTTTTATTACTTAATCA	ACAATAAACATGCAATTACAGCTCTAGAACACATACTATCTTCATGGATGCGGATCCCCGGGTTAATTAA	TTAAGCAAAGTACTGCCGCCGGCACAAAGAGTGATAGACCTATTTGGCGGCGGATCCCCGGGTTAATTAA	GTCATCACATGATGTTTCTTATAAAATGCAATTTTTTTATTACTTAATCAGAATTCGAGCTCGTTTAAAC	0		0		0
YBL030C	PET9,OP1,ANC2,AAC2	2	157743	158699	-	TTTTATACTTCAGAATCATACATTAACATACATATAAGCAAATAGCCATG	TCTCAATGTACGACCAACTGCAAATGATCTTGTTTGGTAAGAAGTTCAAA	GGAAAATGTGAGAAAGAATTTAGATTAAGAATCAAGCCAGATTAGACTTA	TTTTATACTTCAGAATCATACATTAACATACATATAAGCAAATAGCCATGCGGATCCCCGGGTTAATTAA	TCTCAATGTACGACCAACTGCAAATGATCTTGTTTGGTAAGAAGTTCAAACGGATCCCCGGGTTAATTAA	GGAAAATGTGAGAAAGAATTTAGATTAAGAATCAAGCCAGATTAGACTTAGAATTCGAGCTCGTTTAAAC	0		0		0
YBL029C-A	YBL029C-A	2	159190	159474	-	AATCAGATAAGCAACTTAATACACAACCTCAAAAAGAAAAAATTACCATG	TTAATAAAGTCATTCAAGAACAACAAAACTTACGACAAAAGCAGCCCAAC	ATATATAAATACATATATAAGAGGAAGAAAAGGGAATTATTTCGTTATCA	AATCAGATAAGCAACTTAATACACAACCTCAAAAAGAAAAAATTACCATGCGGATCCCCGGGTTAATTAA	TTAATAAAGTCATTCAAGAACAACAAAACTTACGACAAAAGCAGCCCAACCGGATCCCCGGGTTAATTAA	ATATATAAATACATATATAAGAGGAAGAAAAGGGAATTATTTCGTTATCAGAATTCGAGCTCGTTTAAAC	0		0		0
YBL029W	YBL029W	2	160833	161963	+	AAAGCTTAGTCGTAATATATAGAGATTATAAAACCAAAATAAAGCTAATG	GGTTAAGAAGAGAGAGGAGAATGAAGCTTAAGGAACGTAAAAGAACAACC	TATATATGGATGAAATATATAATGCATTTTTTTTTTGGGTAATAAAATTA	AAAGCTTAGTCGTAATATATAGAGATTATAAAACCAAAATAAAGCTAATGCGGATCCCCGGGTTAATTAA	GGTTAAGAAGAGAGAGGAGAATGAAGCTTAAGGAACGTAAAAGAACAACCCGGATCCCCGGGTTAATTAA	TATATATGGATGAAATATATAATGCATTTTTTTTTTGGGTAATAAAATTAGAATTCGAGCTCGTTTAAAC	0		0		0
YBL028C	YBL028C	2	162217	162537	-	AAGAGTTCAGCATATAAAATAAGTTAAAACTTACTAGAACAAGAATCATG	AGGCTAAGCTGATGAAACAATCTAAGAAAAAAACTTCTTTCACTAGATTC	AAATTTTACAACCTAGCTCCTATCAAGTTCTTATTACCTTCATTTTATCA	AAGAGTTCAGCATATAAAATAAGTTAAAACTTACTAGAACAAGAATCATGCGGATCCCCGGGTTAATTAA	AGGCTAAGCTGATGAAACAATCTAAGAAAAAAACTTCTTTCACTAGATTCCGGATCCCCGGGTTAATTAA	AAATTTTACAACCTAGCTCCTATCAAGTTCTTATTACCTTCATTTTATCAGAATTCGAGCTCGTTTAAAC	0		0		0
YBL027W	RPL19B	2	163124	164077	+	ATCTTTTCACCAAATCGAATAAAAAGTCACCAATAAATTAGAGGAAAATG	GAGCTCAAAGAGTTGCTGAAAAGAGAGACGCTTTGCTAAAGGAAGACGCT	GAACAATGAGAAGGTACGTAATTTCTTAGCTAATTATTTGTAATCAATTA	ATCTTTTCACCAAATCGAATAAAAAGTCACCAATAAATTAGAGGAAAATGCGGATCCCCGGGTTAATTAA	GAGCTCAAAGAGTTGCTGAAAAGAGAGACGCTTTGCTAAAGGAAGACGCTCGGATCCCCGGGTTAATTAA	GAACAATGAGAAGGTACGTAATTTCTTAGCTAATTATTTGTAATCAATTAGAATTCGAGCTCGTTTAAAC	0		0		0
YBL026W	LSM2,SNP3,SMX5	2	165305	165720	+	ACAATACTTTCGAACACGTATCTCACGCTGATAACACCCTAGCAAGTATG	CGAATTTGCTACAAGACGCTACCAGAAGGGAGGTAATGACTGAAAGAAAA	TAAAAAACTAATGAGAAAAAATGCCATGAGGATAGACTGCATAATTCTTA	ACAATACTTTCGAACACGTATCTCACGCTGATAACACCCTAGCAAGTATGCGGATCCCCGGGTTAATTAA	CGAATTTGCTACAAGACGCTACCAGAAGGGAGGTAATGACTGAAAGAAAACGGATCCCCGGGTTAATTAA	TAAAAAACTAATGAGAAAAAATGCCATGAGGATAGACTGCATAATTCTTAGAATTCGAGCTCGTTTAAAC	0		0		0
YBL025W	RRN10	2	166163	166600	+	TAAGCACTATATTTCGAACGTTAACCTAAATCTCTCCCACTAAGAAAATG	GCGAATTCATATCAAAACATATTGATTATAGGCATGCGCCAGGTAATATC	AAAGCCTTCCATCCTCCCCAGCCGCAAAAGCCAGGTTTTTGTTACATTCA	TAAGCACTATATTTCGAACGTTAACCTAAATCTCTCCCACTAAGAAAATGCGGATCCCCGGGTTAATTAA	GCGAATTCATATCAAAACATATTGATTATAGGCATGCGCCAGGTAATATCCGGATCCCCGGGTTAATTAA	AAAGCCTTCCATCCTCCCCAGCCGCAAAAGCCAGGTTTTTGTTACATTCAGAATTCGAGCTCGTTTAAAC	0		0		0
YBL024W	NCL1,TRM4	2	167215	169263	+	AGCACTTCCTTTTATCTACACTGTAATCCGAAGAATACACTATAAGGATG	CCGCAGAAACTACTACCGGAACCTCTACTGAAGCTCCTAGCGCTGCTAAT	AATATACATTTACTTTACAGTGGAGGGGATAAGAAACATGATAACTATCA	AGCACTTCCTTTTATCTACACTGTAATCCGAAGAATACACTATAAGGATGCGGATCCCCGGGTTAATTAA	CCGCAGAAACTACTACCGGAACCTCTACTGAAGCTCCTAGCGCTGCTAATCGGATCCCCGGGTTAATTAA	AATATACATTTACTTTACAGTGGAGGGGATAAGAAACATGATAACTATCAGAATTCGAGCTCGTTTAAAC	0		0		0
YBL023C	MCM2	2	169594	172200	-	CTCTTTGCCTCTTTTCTAAGAAGTATAACACAACTACAATATAAGTGATG	GTGTTCGCCGCCAACTCCGCAGGTCTTTCGCAATTTATACCTTGGGTCAC	AGAATTTTTTATCTTCATATCCAGATATTCGTAGGAATAACAAAGTTTTA	CTCTTTGCCTCTTTTCTAAGAAGTATAACACAACTACAATATAAGTGATGCGGATCCCCGGGTTAATTAA	GTGTTCGCCGCCAACTCCGCAGGTCTTTCGCAATTTATACCTTGGGTCACCGGATCCCCGGGTTAATTAA	AGAATTTTTTATCTTCATATCCAGATATTCGTAGGAATAACAAAGTTTTAGAATTCGAGCTCGTTTAAAC	0		0		0
YBL022C	PIM1,LON1	2	172548	175949	-	TCTTTTGGTTTTCGAGGTGCCTGAACGAAAAGATTTGCAAATAAAGCATG	CAGTATGGAAGGCTGAATTTGAGATTTTGGATGCTAAAAAGGAAAAGGAC	TATTTACAGAATGTTTAAACAGGTATTTAATCCATTTAGATGAAAAGTTA	TCTTTTGGTTTTCGAGGTGCCTGAACGAAAAGATTTGCAAATAAAGCATGCGGATCCCCGGGTTAATTAA	CAGTATGGAAGGCTGAATTTGAGATTTTGGATGCTAAAAAGGAAAAGGACCGGATCCCCGGGTTAATTAA	TATTTACAGAATGTTTAAACAGGTATTTAATCCATTTAGATGAAAAGTTAGAATTCGAGCTCGTTTAAAC	0		0		0
YBL021C	HAP3	2	176334	176768	-	AGGACTAAGCTAGGTAGTAACACAAGTGGCACAAACCTCTCGAGAATATG	AGGCGCTCAAGAATCAACTAATGTATGAGCAGGACGACGAAGAGGTGCCT	TCCTGACAGCTAGCAACTTTTGCGATCTACCACCTGGTTTTGTCTTCTCA	AGGACTAAGCTAGGTAGTAACACAAGTGGCACAAACCTCTCGAGAATATGCGGATCCCCGGGTTAATTAA	AGGCGCTCAAGAATCAACTAATGTATGAGCAGGACGACGAAGAGGTGCCTCGGATCCCCGGGTTAATTAA	TCCTGACAGCTAGCAACTTTTGCGATCTACCACCTGGTTTTGTCTTCTCAGAATTCGAGCTCGTTTAAAC	0		0		0
YBL020W	RFT1	2	177075	178799	+	GGTGATCTGAAGTTGATTCTGCTTTTGTCAGTGAAGGAAAAGAAAAAATG	CCATACAATCTTTTATTAACAAGAGGGCGGTTTCCAATTCTAAAGATGTA	ATTTAAGCGCATATTATGTGTCGCCTAAGTTATATAAGAATTTTTGTTTA	GGTGATCTGAAGTTGATTCTGCTTTTGTCAGTGAAGGAAAAGAAAAAATGCGGATCCCCGGGTTAATTAA	CCATACAATCTTTTATTAACAAGAGGGCGGTTTCCAATTCTAAAGATGTACGGATCCCCGGGTTAATTAA	ATTTAAGCGCATATTATGTGTCGCCTAAGTTATATAAGAATTTTTGTTTAGAATTCGAGCTCGTTTAAAC	0		0		0
YBL019W	APN2,ETH1	2	179027	180589	+	AGAAGCTATTTCACCGTAAAGAAAATCCCTTTCCTTGTCAGGACACTATG	GGGGTGATTCAAATAATACAGAATCATCTTGTGGGTTTTTTCAGTGGGTT	GAAGAAAGTGTTTTATTCTCCCAAAATATCAGCTGACGTTCTCATATTTA	AGAAGCTATTTCACCGTAAAGAAAATCCCTTTCCTTGTCAGGACACTATGCGGATCCCCGGGTTAATTAA	GGGGTGATTCAAATAATACAGAATCATCTTGTGGGTTTTTTCAGTGGGTTCGGATCCCCGGGTTAATTAA	GAAGAAAGTGTTTTATTCTCCCAAAATATCAGCTGACGTTCTCATATTTAGAATTCGAGCTCGTTTAAAC	0		0		0
YBL018C	POP8	2	180672	181148	-	CAGAATAAGAAAAGGCAGATAAATAGTTTGATAAATGGCCAGTTGTGATG	TATGGCTGAAAAAAGTAATGGAAGAAGAAGAACAAGACTGTAAATGTATA	AACACTTTCTTCTATGCCCAAGTTTTTTTAAATAATAAACTGATATTCTA	CAGAATAAGAAAAGGCAGATAAATAGTTTGATAAATGGCCAGTTGTGATGCGGATCCCCGGGTTAATTAA	TATGGCTGAAAAAAGTAATGGAAGAAGAAGAACAAGACTGTAAATGTATACGGATCCCCGGGTTAATTAA	AACACTTTCTTCTATGCCCAAGTTTTTTTAAATAATAAACTGATATTCTAGAATTCGAGCTCGTTTAAAC	0		0		0
YBL017C	PEP1,VPT1,VPS10	2	181518	186257	-	CTGTATATCTGGAAAAGTCCTGAAGTGTCCAGTAGTCATCACACGTTATG	AGGAAAACATCGACAGGCCTGATTCTACAGCGCCATCTAACGAAAACCAG	TTTATGAAAAGTATATGGAATTATCTACTCTATGTAAAGTAATCTCTCTA	CTGTATATCTGGAAAAGTCCTGAAGTGTCCAGTAGTCATCACACGTTATGCGGATCCCCGGGTTAATTAA	AGGAAAACATCGACAGGCCTGATTCTACAGCGCCATCTAACGAAAACCAGCGGATCCCCGGGTTAATTAA	TTTATGAAAAGTATATGGAATTATCTACTCTATGTAAAGTAATCTCTCTAGAATTCGAGCTCGTTTAAAC	0		0		0
YBL016W	FUS3,DAC2	2	187125	188186	+	GTTTGAACTACAAGGAAATAAGGCAGAGAAAAAGAAAAGAAAATAATATG	CACTAACGACGAAAGACCTCAAGAAACTCATTTGGAACGAAATATTTAGT	ATATGTATACATTGTTCTTCGGGTTGATATTTTAATGATAATGATGGCTA	GTTTGAACTACAAGGAAATAAGGCAGAGAAAAAGAAAAGAAAATAATATGCGGATCCCCGGGTTAATTAA	CACTAACGACGAAAGACCTCAAGAAACTCATTTGGAACGAAATATTTAGTCGGATCCCCGGGTTAATTAA	ATATGTATACATTGTTCTTCGGGTTGATATTTTAATGATAATGATGGCTAGAATTCGAGCTCGTTTAAAC	0		0		0
YBL015W	ACH1	2	188794	190374	+	AAACAAACAACACATTTCTTTTTTTCTTTTTCACATATTGCACTAAAATG	ACTTAGCTGAAAAGGGTACAATGAAGGTCGACAGCTGGGAACCAGTTGAC	CCTTTCTTTTTTTTTTAAATACTCATCTCTCGGTTTGCGCACAAACACTA	AAACAAACAACACATTTCTTTTTTTCTTTTTCACATATTGCACTAAAATGCGGATCCCCGGGTTAATTAA	ACTTAGCTGAAAAGGGTACAATGAAGGTCGACAGCTGGGAACCAGTTGACCGGATCCCCGGGTTAATTAA	CCTTTCTTTTTTTTTTAAATACTCATCTCTCGGTTTGCGCACAAACACTAGAATTCGAGCTCGTTTAAAC	0		0		0
YBL014C	RRN6	2	194931	197618	-	GATGTGGCAAGTTGAAGTAAAGAGAGAAGGCGTTCTATGGGCTGAGCATG	GTAATTCTCAAAAAGCCAAAAAGAAGAAGAAAAGGATCCGGGGGTTTGGA	TTTATTACTTGTTACATTGTTTTGATTACCTGTGCACGCATTATACCTTA	GATGTGGCAAGTTGAAGTAAAGAGAGAAGGCGTTCTATGGGCTGAGCATGCGGATCCCCGGGTTAATTAA	GTAATTCTCAAAAAGCCAAAAAGAAGAAGAAAAGGATCCGGGGGTTTGGACGGATCCCCGGGTTAATTAA	TTTATTACTTGTTACATTGTTTTGATTACCTGTGCACGCATTATACCTTAGAATTCGAGCTCGTTTAAAC	0		0		0
YBL013W	FMT1	2	197926	199131	+	ACCTAGGCACCTCATAGTGAGAAGATTGAAAACGGCGTATCAAACAAATG	CGCGCCTGCGGAAAAGATGCGGCGCCCTGAGTGAAAAGTTAGTTTTCCTG	TGAAAGAAGGGAGAAGAAGAATACTAAAAGAGGAATGTAGAGCCGGGTTA	ACCTAGGCACCTCATAGTGAGAAGATTGAAAACGGCGTATCAAACAAATGCGGATCCCCGGGTTAATTAA	CGCGCCTGCGGAAAAGATGCGGCGCCCTGAGTGAAAAGTTAGTTTTCCTGCGGATCCCCGGGTTAATTAA	TGAAAGAAGGGAGAAGAAGAATACTAAAAGAGGAATGTAGAGCCGGGTTAGAATTCGAGCTCGTTTAAAC	0		0		0
YBL012C	YBL012C	2	199276	199677	-	TTCTTCACCTCGCCCATAAGGATTACAGGGTCGACGAACTGGTTAGCATG	CTGTTATGAACTACAAGCCATTACTAACATCAATCTTTCCGAATCATAAA	CTATGAAGAAAAAGAAAAGTAGGCCCGCCTTCTTTCCCAGTTGCAGTTTA	TTCTTCACCTCGCCCATAAGGATTACAGGGTCGACGAACTGGTTAGCATGCGGATCCCCGGGTTAATTAA	CTGTTATGAACTACAAGCCATTACTAACATCAATCTTTCCGAATCATAAACGGATCCCCGGGTTAATTAA	CTATGAAGAAAAAGAAAAGTAGGCCCGCCTTCTTTCCCAGTTGCAGTTTAGAATTCGAGCTCGTTTAAAC	1	YBL011W	1	YBL011W	0
YBL011W	SCT1,GAT2	2	199408	201684	+	TATATAGTAAAAAGAGCACAGGGGCGTTTACATCGGGGTAAAAAAAAATG	AAGAGGAAGAAGAAGAGGAAGAAGAAGAAGAAGGGAAAGAAGGAGATGCG	CGGCGAAAGATTTAGTTTCTAGTATCTTCACCGTCAGTAAATGGCATCTA	TATATAGTAAAAAGAGCACAGGGGCGTTTACATCGGGGTAAAAAAAAATGCGGATCCCCGGGTTAATTAA	AAGAGGAAGAAGAAGAGGAAGAAGAAGAAGAAGGGAAAGAAGGAGATGCGCGGATCCCCGGGTTAATTAA	CGGCGAAAGATTTAGTTTCTAGTATCTTCACCGTCAGTAAATGGCATCTAGAATTCGAGCTCGTTTAAAC	1	YBL012C	1	YBL012C	0
YBL010C	YBL010C	2	201974	202816	-	TTAAGGTGTAGCAAGATAGAAAAAGGCACCTCTTTCAAAGCAAGCAAATG	TGTATAACAAAAAGCGAAACAAAAAGAAAAGGTTCAGTTGGGTAGGATAC	TATTCTCTTCAAACTTGAACGTTTAACCTGCTTTGCCGAGACGGCGATTA	TTAAGGTGTAGCAAGATAGAAAAAGGCACCTCTTTCAAAGCAAGCAAATGCGGATCCCCGGGTTAATTAA	TGTATAACAAAAAGCGAAACAAAAAGAAAAGGTTCAGTTGGGTAGGATACCGGATCCCCGGGTTAATTAA	TATTCTCTTCAAACTTGAACGTTTAACCTGCTTTGCCGAGACGGCGATTAGAATTCGAGCTCGTTTAAAC	0		0		0
YBL009W	ALK2	2	203060	205090	+	AAATCATTTCACCAAACACACATATATGCGCTATTTGTATTGAGAAAATG	TTATAAGAACTTGCGGTGATTTGTTATCTTTGAAGGGAGAAATAATGCAG	CTCATTAAGAAGGATACAAAAGCTTGTACCTTATTACTACGATGTCTTTA	AAATCATTTCACCAAACACACATATATGCGCTATTTGTATTGAGAAAATGCGGATCCCCGGGTTAATTAA	TTATAAGAACTTGCGGTGATTTGTTATCTTTGAAGGGAGAAATAATGCAGCGGATCCCCGGGTTAATTAA	CTCATTAAGAAGGATACAAAAGCTTGTACCTTATTACTACGATGTCTTTAGAATTCGAGCTCGTTTAAAC	0		0		0
YBL008W-A	YBL008W-A	2	205275	205514	+	TTAGCTTGCCCCACAAACTGAAAGCACATTTTTAAAATGTGTTACAGATG	TTAAGGCTTACTAACGAAGCATAATAAAATTGCCAGTAACCAAAGGTCTC	ATTCTTCACGGTGAGCCAACCATGGAAACTTTACCACTTTCATGTTATCA	TTAGCTTGCCCCACAAACTGAAAGCACATTTTTAAAATGTGTTACAGATGCGGATCCCCGGGTTAATTAA	TTAAGGCTTACTAACGAAGCATAATAAAATTGCCAGTAACCAAAGGTCTCCGGATCCCCGGGTTAATTAA	ATTCTTCACGGTGAGCCAACCATGGAAACTTTACCACTTTCATGTTATCAGAATTCGAGCTCGTTTAAAC	0		0		0
YBL008W	HIR1	2	205519	208041	+	CTAACGAAGCATAATAAAATTGCCAGTAACCAAAGGTCTCTGATAACATG	AAAATGTGTATAAATGGACTAAGGATCTGGGTTGTTGGTCGTTATATAAA	GTAATTATGAGGGAAAAAACTTGTCCAAAGGAAGGGGTATAAGCTTATTA	CTAACGAAGCATAATAAAATTGCCAGTAACCAAAGGTCTCTGATAACATGCGGATCCCCGGGTTAATTAA	AAAATGTGTATAAATGGACTAAGGATCTGGGTTGTTGGTCGTTATATAAACGGATCCCCGGGTTAATTAA	GTAATTATGAGGGAAAAAACTTGTCCAAAGGAAGGGGTATAAGCTTATTAGAATTCGAGCTCGTTTAAAC	0		0		0
YBL007C	SLA1	2	208500	212234	-	AACATAGCCAAGGCGACAGAGTGTGTTATATACAAAAGAGCTAGAGTATG	CAAGGCAAGCCAACATATTCAATGCTACTGCATCAAATCCGTTTGGATTC	ATAGCTTGTTTTAGTTATTATCCTATAAAATCTTAAAATACATTAATCTA	AACATAGCCAAGGCGACAGAGTGTGTTATATACAAAAGAGCTAGAGTATGCGGATCCCCGGGTTAATTAA	CAAGGCAAGCCAACATATTCAATGCTACTGCATCAAATCCGTTTGGATTCCGGATCCCCGGGTTAATTAA	ATAGCTTGTTTTAGTTATTATCCTATAAAATCTTAAAATACATTAATCTAGAATTCGAGCTCGTTTAAAC	0		0		0
YBL006C	LDB7,RSC14	2	212455	212997	-	TTTACCTGAAAGCAGCAGAGCACGGTGTTAACAAGGAATAGCTGAGAATG	TTATAGGTCCCCATAGGCGGTCTCAACTTAGAGAACATGCCTGCGTAGAT	TCGTCACTTTCTACGAAGCAACATTCTACCTCTATCAATTACATGGTTTA	TTTACCTGAAAGCAGCAGAGCACGGTGTTAACAAGGAATAGCTGAGAATGCGGATCCCCGGGTTAATTAA	TTATAGGTCCCCATAGGCGGTCTCAACTTAGAGAACATGCCTGCGTAGATCGGATCCCCGGGTTAATTAA	TCGTCACTTTCTACGAAGCAACATTCTACCTCTATCAATTACATGGTTTAGAATTCGAGCTCGTTTAAAC	1	YBL006W-A	1	YBL006W-A	0
YBL006W-A	YBL006W-A	2	212579	212728	+	TTATCACTTTTCTTTTCCTTTTAGCCTCGCTATTCCTGGGGCTCTCTATG	GGTGCGAAAAGTCGACACTTGACAGGGCTTCCAACTGCTGGCGTGGCACA	GATGCAGCACAGGTGGAGTATGAAGTAGGCCATTCACTGCTGGGCAGTTA	TTATCACTTTTCTTTTCCTTTTAGCCTCGCTATTCCTGGGGCTCTCTATGCGGATCCCCGGGTTAATTAA	GGTGCGAAAAGTCGACACTTGACAGGGCTTCCAACTGCTGGCGTGGCACACGGATCCCCGGGTTAATTAA	GATGCAGCACAGGTGGAGTATGAAGTAGGCCATTCACTGCTGGGCAGTTAGAATTCGAGCTCGTTTAAAC	1	YBL006C	1	YBL006C	0
YBL005W	PDR3,TPE2,AMY2	2	213338	216268	+	CAACTGCATCAGCAGTTTTATTAATTTTTTCTTATTGCGTGACCGCAATG	CTGATTTATATCATACTCTGTGGAATGACAATACTTCATATCCCTTCTTA	TCCCATTTACTATGGTTATGCTCTGCTTCCCTATTTTCTTTGCGTTTTCA	CAACTGCATCAGCAGTTTTATTAATTTTTTCTTATTGCGTGACCGCAATGCGGATCCCCGGGTTAATTAA	CTGATTTATATCATACTCTGTGGAATGACAATACTTCATATCCCTTCTTACGGATCCCCGGGTTAATTAA	TCCCATTTACTATGGTTATGCTCTGCTTCCCTATTTTCTTTGCGTTTTCAGAATTCGAGCTCGTTTAAAC	0		0		0
YBL005W-A	YBL005W-A	2	216899	216899	+	TTCTAGTATTATCTGTATATCTAATATTATAGTCTCTAACAACAGTGGTA		GATAGTTGATTTTTACTCCAACAATTTTGTCATAACTGTTGGGATTACCA	TTCTAGTATTATCTGTATATCTAATATTATAGTCTCTAACAACAGTGATGCGGATCCCCGGGTTAATTAA	CGGATCCCCGGGTTAATTAA	GATAGTTGATTTTTACTCCAACAATTTTGTCATAACTGTTGGGATTACCAGAATTCGAGCTCGTTTAAAC	1	YBL005W-B	1	YBL005W-B	0
YBL005W-B	YBL005W-B	2	216899	216900	+	TTCTAGTATTATCTGTATATCTAATATTATAGTCTCTAACAACAGTGGTA		TGATAGTTGATTTTTACTCCAACAATTTTGTCATAACTGTTGGGATTACC	TTCTAGTATTATCTGTATATCTAATATTATAGTCTCTAACAACAGTGATGCGGATCCCCGGGTTAATTAA	CGGATCCCCGGGTTAATTAA	TGATAGTTGATTTTTACTCCAACAATTTTGTCATAACTGTTGGGATTACCGAATTCGAGCTCGTTTAAAC	1	YBL005W-A	1	YBL005W-A	0
YBL004W	UTP20	2	217980	225461	+	CGTATTGGTATATTTCTAGTATCAGTTACACATATTTCATTGAAAGTATG	AAAAGGATGAAAATGGGTATTATCAAAGACGTAACAAAAGAAAGAGAGTC	TTGGATTTTTTATTCATTAGTATACATGTTATAAAGATATATTACAGCTA	CGTATTGGTATATTTCTAGTATCAGTTACACATATTTCATTGAAAGTATGCGGATCCCCGGGTTAATTAA	AAAAGGATGAAAATGGGTATTATCAAAGACGTAACAAAAGAAAGAGAGTCCGGATCCCCGGGTTAATTAA	TTGGATTTTTTATTCATTAGTATACATGTTATAAAGATATATTACAGCTAGAATTCGAGCTCGTTTAAAC	0		0		0
YBL003C	HTA2,H2A2	2	225738	226136	-	TACATAAGAATTAGGAAAGTACAGAACAAGAGCAAATTTAATATATAATG	ACTTGTTGCCAAAGAAGTCTGCCAAGACTGCCAAAGCTTCTCAAGAACTG	AAATGACAAGAATGTTTGATTTGCTTTGTTTCTTTTCAACTCAGTTCTTA	TACATAAGAATTAGGAAAGTACAGAACAAGAGCAAATTTAATATATAATGCGGATCCCCGGGTTAATTAA	ACTTGTTGCCAAAGAAGTCTGCCAAGACTGCCAAAGCTTCTCAAGAACTGCGGATCCCCGGGTTAATTAA	AAATGACAAGAATGTTTGATTTGCTTTGTTTCTTTTCAACTCAGTTCTTAGAATTCGAGCTCGTTTAAAC	0		0		0
YBL002W	HTB2	2	226835	227230	+	TTCTGATTGCTCTATACTCAAACCAACAACAACTTACTCTACAACTAATG	TCTCCGAAGGTACTAGGGCTGTTACCAAATACTCCTCCTCTACTCAAGCC	ACTAATAAAAAGAAAACATGACTAAATCACAATACCTAGTGAGTGACTTA	TTCTGATTGCTCTATACTCAAACCAACAACAACTTACTCTACAACTAATGCGGATCCCCGGGTTAATTAA	TCTCCGAAGGTACTAGGGCTGTTACCAAATACTCCTCCTCTACTCAAGCCCGGATCCCCGGGTTAATTAA	ACTAATAAAAAGAAAACATGACTAAATCACAATACCTAGTGAGTGACTTAGAATTCGAGCTCGTTTAAAC	0		0		0
YBL001C	ECM15	2	227496	227810	-	CCGTCGTGATCATTAAATATAAAGCACATAAACTACAAGTTTAGAAAATG	ACCAAACTGCTCAAGACAAGATCGATGTTGTTTTAAAAAAAATTTCTCAA	AAACTCTCCTTAAAGATATACCCTATTTAGGTTCACTACACGAGCGTTCA	CCGTCGTGATCATTAAATATAAAGCACATAAACTACAAGTTTAGAAAATGCGGATCCCCGGGTTAATTAA	ACCAAACTGCTCAAGACAAGATCGATGTTGTTTTAAAAAAAATTTCTCAACGGATCCCCGGGTTAATTAA	AAACTCTCCTTAAAGATATACCCTATTTAGGTTCACTACACGAGCGTTCAGAATTCGAGCTCGTTTAAAC	0		0		0
YBR001C	NTH2	2	229282	231624	-	TCGGATCAGACATTTGGTATATAAGGAGACCTGCATATACTCAAATAATG	TGCCATTTTTCAATAGTTTGAAACCCTCTGAGAAAAAATTGTATTACCTT	TAGAAAGAAGAATATAACATATATCTTATTACATATGTTCGTCAATATTA	TCGGATCAGACATTTGGTATATAAGGAGACCTGCATATACTCAAATAATGCGGATCCCCGGGTTAATTAA	TGCCATTTTTCAATAGTTTGAAACCCTCTGAGAAAAAATTGTATTACCTTCGGATCCCCGGGTTAATTAA	TAGAAAGAAGAATATAACATATATCTTATTACATATGTTCGTCAATATTAGAATTCGAGCTCGTTTAAAC	0		0		0
YBR002C	RER2	2	232049	232908	-	ATAGAACTTAAGCAGTAAAAATAGGGTAAACACAGGTAAAAGACGGTATG	GACGAGGAAACCAATGGGGACCCCATCGATTTGAAAGAAAAAAAGTGAAT	TCTATAAATATCTATGCCATGTGGTAGGAAAAAAATGCAGACCTTTCTTA	ATAGAACTTAAGCAGTAAAAATAGGGTAAACACAGGTAAAAGACGGTATGCGGATCCCCGGGTTAATTAA	GACGAGGAAACCAATGGGGACCCCATCGATTTGAAAGAAAAAAAGTGAATCGGATCCCCGGGTTAATTAA	TCTATAAATATCTATGCCATGTGGTAGGAAAAAAATGCAGACCTTTCTTAGAATTCGAGCTCGTTTAAAC	0		0		0
YBR003W	COQ1	2	233149	234570	+	CAACACAAGAACTGTGCCATTCAGTCCGAATTGAGTACAGTGGGACGATG	CTCGTTCTGCCCTAGAGTTTTTAACTAATAGTATACTAACAAGAAGAAAG	TCTTCATTTTCTCTTTATTCTTCACCCTTTATTTGAAATTTCAAGGTTTA	CAACACAAGAACTGTGCCATTCAGTCCGAATTGAGTACAGTGGGACGATGCGGATCCCCGGGTTAATTAA	CTCGTTCTGCCCTAGAGTTTTTAACTAATAGTATACTAACAAGAAGAAAGCGGATCCCCGGGTTAATTAA	TCTTCATTTTCTCTTTATTCTTCACCCTTTATTTGAAATTTCAAGGTTTAGAATTCGAGCTCGTTTAAAC	0		0		0
YBR004C	GPI18,FMP44	2	234706	236007	-	AAAAGAGAGGCTTCGAGAGAGGAGGCGGAATAAGACTAAATTAAAATATG	TCTGGATACCTTTACAGACTATCCTATTTGCAGCTTTTTTACCACCAGCC	GTTTTTATATGTTTTTAGTAAAAGAAGAAATATACAAGCATTAAGGATCA	AAAAGAGAGGCTTCGAGAGAGGAGGCGGAATAAGACTAAATTAAAATATGCGGATCCCCGGGTTAATTAA	TCTGGATACCTTTACAGACTATCCTATTTGCAGCTTTTTTACCACCAGCCCGGATCCCCGGGTTAATTAA	GTTTTTATATGTTTTTAGTAAAAGAAGAAATATACAAGCATTAAGGATCAGAATTCGAGCTCGTTTAAAC	0		0		0
YBR005W	RCR1	2	236247	236888	+	GATCATTCCAATAAATAGAAAAGTATAACTCGAATTAAGAATAAGGAATG	CAACGCAGGAAATTAACCCACCGGAGAGGGCAAAGGTAAATGCAAGGTCA	ATATTGTAACTCAACTGTAAGAGGACAGCCGGAAAAAAAGATTCAGTTCA	GATCATTCCAATAAATAGAAAAGTATAACTCGAATTAAGAATAAGGAATGCGGATCCCCGGGTTAATTAA	CAACGCAGGAAATTAACCCACCGGAGAGGGCAAAGGTAAATGCAAGGTCACGGATCCCCGGGTTAATTAA	ATATTGTAACTCAACTGTAAGAGGACAGCCGGAAAAAAAGATTCAGTTCAGAATTCGAGCTCGTTTAAAC	0		0		0
YBR006W	UGA2,UGA5	2	237351	238844	+	GAAAACCAGCCACATTAAAAGCAAATTTTACAAACTACTATTTCAACATG	ATTACACTGTTTTGAAGACCATCACAATTGGGAATTTGCCAAACAGCATT	CAAAGAATCATATTCAATTCTAAGTATCGTCCACGATTACTATTGCTTTA	GAAAACCAGCCACATTAAAAGCAAATTTTACAAACTACTATTTCAACATGCGGATCCCCGGGTTAATTAA	ATTACACTGTTTTGAAGACCATCACAATTGGGAATTTGCCAAACAGCATTCGGATCCCCGGGTTAATTAA	CAAAGAATCATATTCAATTCTAAGTATCGTCCACGATTACTATTGCTTTAGAATTCGAGCTCGTTTAAAC	0		0		0
YBR007C	DSF2	2	239147	241357	-	CAGAAAATCTAGAAAAACAAACGGACTTTTACGTCACACGAAAAGTAATG	TAGGTTCAGATTGGATTTATAAGGAAAAGTACATGAAACAAGGTCCGAAA	TTTTAAGCCTTTCTGTAAGCTTTTATGTATACAACGTTTCTTTATCTTTA	CAGAAAATCTAGAAAAACAAACGGACTTTTACGTCACACGAAAAGTAATGCGGATCCCCGGGTTAATTAA	TAGGTTCAGATTGGATTTATAAGGAAAAGTACATGAAACAAGGTCCGAAACGGATCCCCGGGTTAATTAA	TTTTAAGCCTTTCTGTAAGCTTTTATGTATACAACGTTTCTTTATCTTTAGAATTCGAGCTCGTTTAAAC	0		0		0
YBR008C	FLR1	2	242902	244548	-	TGGTGAAGCTATTATAAAAGAGTATCCGTTGAACGACAATCTCCACTATG	TTTATAAGTATGGGCCATCATTACGTGCAAGATCTTCGTACACAGAGGAG	AATTGTGTTATTATAATTCAAATTTTCATGGTAAGAACATCGGCTTTCTA	TGGTGAAGCTATTATAAAAGAGTATCCGTTGAACGACAATCTCCACTATGCGGATCCCCGGGTTAATTAA	TTTATAAGTATGGGCCATCATTACGTGCAAGATCTTCGTACACAGAGGAGCGGATCCCCGGGTTAATTAA	AATTGTGTTATTATAATTCAAATTTTCATGGTAAGAACATCGGCTTTCTAGAATTCGAGCTCGTTTAAAC	0		0		0
YBR009C	HHF1	2	245712	246023	-	ACTAAAGCAACAAACAAAAACAAGCAACAAATATAATATAGTATAATATG	TTGTTTATGCTTTGAAGAGACAAGGTAGAACCTTATACGGTTTCGGTGGT	ATCCCAAATATTTGCTTGTTGTTACCGTTTTCTTAGAATTAGCTAAATTA	ACTAAAGCAACAAACAAAAACAAGCAACAAATATAATATAGTATAATATGCGGATCCCCGGGTTAATTAA	TTGTTTATGCTTTGAAGAGACAAGGTAGAACCTTATACGGTTTCGGTGGTCGGATCCCCGGGTTAATTAA	ATCCCAAATATTTGCTTGTTGTTACCGTTTTCTTAGAATTAGCTAAATTAGAATTCGAGCTCGTTTAAAC	0		0		0
YBR010W	HHT1,SIN2,BUR5	2	246671	247081	+	TCTAGTTAATAAGAAAAACATCTAACATAAATATATAAACGCAAACAATG	TCCAAAAGAAGGATATCAAGTTGGCTAGAAGATTAAGAGGTGAAAGATCA	ATTGTGTTTTTGTTCGTTTTTGACTAAAACTGATGACAATCAACAAACTA	TCTAGTTAATAAGAAAAACATCTAACATAAATATATAAACGCAAACAATGCGGATCCCCGGGTTAATTAA	TCCAAAAGAAGGATATCAAGTTGGCTAGAAGATTAAGAGGTGAAAGATCACGGATCCCCGGGTTAATTAA	ATTGTGTTTTTGTTCGTTTTTGACTAAAACTGATGACAATCAACAAACTAGAATTCGAGCTCGTTTAAAC	0		0		0
YBR011C	IPP1,PPA1	2	247452	248315	-	TGTCCCTTAGGTCTATAGAACAGGATATCCCGCCGCGCAATTTACTAATG	CTCCAATTGACAAGTCTATTGACAAGTGGTTCTTCATCTCCGGTTCTGTT	TTGAAGCCGCATACGTGGTAGGTGTCTCATTTTCAATTCAAAATATTTTA	TGTCCCTTAGGTCTATAGAACAGGATATCCCGCCGCGCAATTTACTAATGCGGATCCCCGGGTTAATTAA	CTCCAATTGACAAGTCTATTGACAAGTGGTTCTTCATCTCCGGTTCTGTTCGGATCCCCGGGTTAATTAA	TTGAAGCCGCATACGTGGTAGGTGTCTCATTTTCAATTCAAAATATTTTAGAATTCGAGCTCGTTTAAAC	0		0		0
YBR012C	YBR012C	2	249492	249911	-	TACAGAATATTTTTTATCAATTGTTGTTAACCGTGAATTACTTTAACATG	TATCGGCAGTAGGTGTAGAACATCGATATCATAAAAGTGTTCCTCGTCTA	ACATGTCCAATACACTTTTTCGAACTATAACCGCCAACAAATTTATCTTA	TACAGAATATTTTTTATCAATTGTTGTTAACCGTGAATTACTTTAACATGCGGATCCCCGGGTTAATTAA	TATCGGCAGTAGGTGTAGAACATCGATATCATAAAAGTGTTCCTCGTCTACGGATCCCCGGGTTAATTAA	ACATGTCCAATACACTTTTTCGAACTATAACCGCCAACAAATTTATCTTAGAATTCGAGCTCGTTTAAAC	0		0		0
YBR012W-A	YBR012W-A	2	249917	249917	+	TCTTTGTAGGTAATTCTTCTGGCTTACTTTGATCTTATTCATGTTAAAGT		CGCTTATACAGAATATTTTTTATCAATTGTTGTTAACCGTGAATTACTTT	TCTTTGTAGGTAATTCTTCTGGCTTACTTTGATCTTATTCATGTTAAATGCGGATCCCCGGGTTAATTAA	CGGATCCCCGGGTTAATTAA	CGCTTATACAGAATATTTTTTATCAATTGTTGTTAACCGTGAATTACTTTGAATTCGAGCTCGTTTAAAC	2	YBR012W-B;YBR013C	2	YBR012W-B;YBR013C	0
YBR012W-B	YBR012W-B	2	249917	249917	+	TCTTTGTAGGTAATTCTTCTGGCTTACTTTGATCTTATTCATGTTAAAGT		CGCTTATACAGAATATTTTTTATCAATTGTTGTTAACCGTGAATTACTTT	TCTTTGTAGGTAATTCTTCTGGCTTACTTTGATCTTATTCATGTTAAATGCGGATCCCCGGGTTAATTAA	CGGATCCCCGGGTTAATTAA	CGCTTATACAGAATATTTTTTATCAATTGTTGTTAACCGTGAATTACTTTGAATTCGAGCTCGTTTAAAC	2	YBR012W-A;YBR013C	2	YBR012W-A;YBR013C	0
YBR013C	YBR013C	2	249917	250304	-	GTACAAGGATCCGTATTAATTGCGTTTTTAGGCCACTTAACCTCATAATG	GGGGACGCTTATACAGAATATTTTTTATCAATTGTTGTTAACCGTGAATT	TCTTTGTAGGTAATTCTTCTGGCTTACTTTGATCTTATTCATGTTAAAGT	GTACAAGGATCCGTATTAATTGCGTTTTTAGGCCACTTAACCTCATAATGCGGATCCCCGGGTTAATTAA	GGGGACGCTTATACAGAATATTTTTTATCAATTGTTGTTAACCGTGAATTCGGATCCCCGGGTTAATTAA	TCTTTGTAGGTAATTCTTCTGGCTTACTTTGATCTTATTCATGTTAAAGTGAATTCGAGCTCGTTTAAAC	2	YBR012W-A;YBR012W-B	2	YBR012W-A;YBR012W-B	0
YBR014C	GRX6	2	251148	251759	-	AAGCAAAATTTTCAAATTAAACGCAAAACAACTGAAGAAAATTAGAGATG	GGAGCGATGGGGCGTTTACTGTAAAAGCTAATTCGCAATCTGAGAGTGCC	GCTACTGTGGGAGAAGAAGAAGAATAACTCTCAGTTTATAATCTGATCTA	AAGCAAAATTTTCAAATTAAACGCAAAACAACTGAAGAAAATTAGAGATGCGGATCCCCGGGTTAATTAA	GGAGCGATGGGGCGTTTACTGTAAAAGCTAATTCGCAATCTGAGAGTGCCCGGATCCCCGGGTTAATTAA	GCTACTGTGGGAGAAGAAGAAGAATAACTCTCAGTTTATAATCTGATCTAGAATTCGAGCTCGTTTAAAC	0		0		0
YBR015C	MNN2,LDB8,CRV4,TTP1	2	252133	253926	-	TTCGAGACAAATCAGTGTAGGTAGGTCAGTAAAATTATATTTTCAGTATG	ATAGATTAGCATTTTTAGAATCTACTCATGATAAGGCGATTGCCGGTAAA	AAAACGCCAATGGAAGTTGTCCAAACTATAGTCCGACCCGTTGCATATTA	TTCGAGACAAATCAGTGTAGGTAGGTCAGTAAAATTATATTTTCAGTATGCGGATCCCCGGGTTAATTAA	ATAGATTAGCATTTTTAGAATCTACTCATGATAAGGCGATTGCCGGTAAACGGATCCCCGGGTTAATTAA	AAAACGCCAATGGAAGTTGTCCAAACTATAGTCCGACCCGTTGCATATTAGAATTCGAGCTCGTTTAAAC	0		0		0
YBR016W	YBR016W	2	254670	255053	+	TGAAGAGGCTCACTAGTAAGCTTAAGATAGTCCTACACACAACCACCATG	CTGCATGTCTGGCTGCATTATGTATATGCTGCACCATGGATATGCTATTC	AGATTATTCTTTTTTTTTTTCATTCTTGAATACTTTTGCGGGTTCTCTTA	TGAAGAGGCTCACTAGTAAGCTTAAGATAGTCCTACACACAACCACCATGCGGATCCCCGGGTTAATTAA	CTGCATGTCTGGCTGCATTATGTATATGCTGCACCATGGATATGCTATTCCGGATCCCCGGGTTAATTAA	AGATTATTCTTTTTTTTTTTCATTCTTGAATACTTTTGCGGGTTCTCTTAGAATTCGAGCTCGTTTAAAC	0		0		0
YBR017C	KAP104	2	255366	258116	-	GCAGTCTTTGGTTTCCAGAATTGTTAGCAGTAGTTAAGTGAATAAAGATG	CAATAAATTTCACGCCCGATGAAATCTCCTTCTTACAACAGTTCACCAGC	ATAATGTACCAAACTATACAAACACGTAGGATACAGTAAAAAAAATTTTA	GCAGTCTTTGGTTTCCAGAATTGTTAGCAGTAGTTAAGTGAATAAAGATGCGGATCCCCGGGTTAATTAA	CAATAAATTTCACGCCCGATGAAATCTCCTTCTTACAACAGTTCACCAGCCGGATCCCCGGGTTAATTAA	ATAATGTACCAAACTATACAAACACGTAGGATACAGTAAAAAAAATTTTAGAATTCGAGCTCGTTTAAAC	0		0		0
YBR018C	GAL7	2	258827	259927	-	CAGAGCATCAACATGATAAAAAAAAACAGTTGAATATTCCCTCAAAAATG	CTGAAAAACTAAGAAATTTGGATGGTCAGATTCATTATCTGCAAAGACTG	GCAGTTAATAGAAAAAATATGATATGAATGAATATTCCACTTTCTTTTTA	CAGAGCATCAACATGATAAAAAAAAACAGTTGAATATTCCCTCAAAAATGCGGATCCCCGGGTTAATTAA	CTGAAAAACTAAGAAATTTGGATGGTCAGATTCATTATCTGCAAAGACTGCGGATCCCCGGGTTAATTAA	GCAGTTAATAGAAAAAATATGATATGAATGAATATTCCACTTTCTTTTTAGAATTCGAGCTCGTTTAAAC	0		0		0
YBR019C	GAL10	2	260653	262753	-	NNNNNNNNNNNNNNNNNNNNNNNNNNNNNNNNNNNNNNNNNNNNNNNNNN	CCTTGAAAAACGGTGAAACTTACGGGTCCAAGATTGTCTACAGATTTTCC	AAAAGATATAGAGTGCATATTTTCAAGAAGGATAGTAAGCTGGCAAATCA	NNNNNNNNNNNNNNNNNNNNNNNNNNNNNNNNNNNNNNNNNNNNNNNATGCGGATCCCCGGGTTAATTAA	CCTTGAAAAACGGTGAAACTTACGGGTCCAAGATTGTCTACAGATTTTCCCGGATCCCCGGGTTAATTAA	AAAAGATATAGAGTGCATATTTTCAAGAAGGATAGTAAGCTGGCAAATCAGAATTCGAGCTCGTTTAAAC	0		0		0
YBR020W	GAL1	2	263422	265008	+	NNNNNNNNNNNNNNNNNNNNNNNNNNNNNNNNNNNNNNNNNNNNNNNNNN	ATGCTATTATCGTCTCTAAACCAGCATTGGGCAGCTGTCTATATGAATTA	AAAAAAATGAGAAGTTGTTCTGAACAAAGTAAAAAAAAGAAGTATACTTA	NNNNNNNNNNNNNNNNNNNNNNNNNNNNNNNNNNNNNNNNNNNNNNNATGCGGATCCCCGGGTTAATTAA	ATGCTATTATCGTCTCTAAACCAGCATTGGGCAGCTGTCTATATGAATTACGGATCCCCGGGTTAATTAA	AAAAAAATGAGAAGTTGTTCTGAACAAAGTAAAAAAAAGAAGTATACTTAGAATTCGAGCTCGTTTAAAC	0		0		0
YBR021W	FUR4	2	265844	267745	+	TTTCGGTTCGAAGACATTCCTACGCATAATAAGAATAGGAGGGAATAATG	TAGATGACAATATTAGTGTCTACGAACACGAACACGAAAAGACTTTCATT	GAAAAATATTTCAGATTAATGCAGAAAGTGATGTAGATATGGAGAGCTTA	TTTCGGTTCGAAGACATTCCTACGCATAATAAGAATAGGAGGGAATAATGCGGATCCCCGGGTTAATTAA	TAGATGACAATATTAGTGTCTACGAACACGAACACGAAAAGACTTTCATTCGGATCCCCGGGTTAATTAA	GAAAAATATTTCAGATTAATGCAGAAAGTGATGTAGATATGGAGAGCTTAGAATTCGAGCTCGTTTAAAC	0		0		0
YBR022W	POA1	2	268139	268672	+	GTTTATTAGTATCTTCTCCAAGATAAATATAGCATCAACTTACAGGTATG	GCGTGTTAGAAGAATTTAGTGGCGACATGAGTTTTACAGTATATCAGCTG	TAAATATTTCTCTATCTTTAAAGGCACATATTACGTGGCTAAGGCAATTA	GTTTATTAGTATCTTCTCCAAGATAAATATAGCATCAACTTACAGGTATGCGGATCCCCGGGTTAATTAA	GCGTGTTAGAAGAATTTAGTGGCGACATGAGTTTTACAGTATATCAGCTGCGGATCCCCGGGTTAATTAA	TAAATATTTCTCTATCTTTAAAGGCACATATTACGTGGCTAAGGCAATTAGAATTCGAGCTCGTTTAAAC	0		0		0
YBR023C	CHS3,KTI2,DIT101,CSD2,CAL1	2	268829	272326	-	TTTTCTTCAAAGGTCCTGTTTAGACTATCCGCAGGAAAGAAATTAGAATG	AAAGGGAAGATATTCTCAATCGGAAGGAGGAAAGTGACTCCTTAGTTGCA	CCATATATCAACTTGTAAGTATCACAGTAAAAATATTTTCATACTGTCTA	TTTTCTTCAAAGGTCCTGTTTAGACTATCCGCAGGAAAGAAATTAGAATGCGGATCCCCGGGTTAATTAA	AAAGGGAAGATATTCTCAATCGGAAGGAGGAAAGTGACTCCTTAGTTGCACGGATCCCCGGGTTAATTAA	CCATATATCAACTTGTAAGTATCACAGTAAAAATATTTTCATACTGTCTAGAATTCGAGCTCGTTTAAAC	0		0		0
YBR024W	SCO2	2	273846	274751	+	TTTTATAATATTACCATAGAAAGGGGAATTTGGGAAGCGAGAGTAAAATG	AGGAAGAACGGGAGCGTAGGTCAAAAAAATGGTACTCTTTTATCTTCAAT	CCCATAAGTTCGGTATCCTAGCTGTGTCTTTTTCTTTTTTTTTTTGCTCA	TTTTATAATATTACCATAGAAAGGGGAATTTGGGAAGCGAGAGTAAAATGCGGATCCCCGGGTTAATTAA	AGGAAGAACGGGAGCGTAGGTCAAAAAAATGGTACTCTTTTATCTTCAATCGGATCCCCGGGTTAATTAA	CCCATAAGTTCGGTATCCTAGCTGTGTCTTTTTCTTTTTTTTTTTGCTCAGAATTCGAGCTCGTTTAAAC	0		0		0
YBR025C	OLA1	2	275082	276266	-	TACTTCTAGTATCCGTAAAAACAATCAAATAAATAGCACTGTAAAACATG	TCGTTGAAGACGGTGATATCATTTACTTCAGAGCTGGTGCTGGTAAGAAT	GTAGGGAACTAAACCAAATAAAGAAAAGTCAACTTTAGTGCACGAAATCA	TACTTCTAGTATCCGTAAAAACAATCAAATAAATAGCACTGTAAAACATGCGGATCCCCGGGTTAATTAA	TCGTTGAAGACGGTGATATCATTTACTTCAGAGCTGGTGCTGGTAAGAATCGGATCCCCGGGTTAATTAA	GTAGGGAACTAAACCAAATAAAGAAAAGTCAACTTTAGTGCACGAAATCAGAATTCGAGCTCGTTTAAAC	0		0		0
YBR026C	ETR1,MRF1',MRF1	2	277278	278419	-	TCATTTAAGAAGGTTCATAATCTGCCAATTACATTTGATATAACAAGATG	AAAAAGGCATAACTGGGAAGGGGAAGAAAAAAATGGTTGTTTTAGAATGG	GAATATTATCTTTGGTGGTTGTCTAACTCTAAGCAATGCTAAGGCCCTTA	TCATTTAAGAAGGTTCATAATCTGCCAATTACATTTGATATAACAAGATGCGGATCCCCGGGTTAATTAA	AAAAAGGCATAACTGGGAAGGGGAAGAAAAAAATGGTTGTTTTAGAATGGCGGATCCCCGGGTTAATTAA	GAATATTATCTTTGGTGGTTGTCTAACTCTAAGCAATGCTAAGGCCCTTAGAATTCGAGCTCGTTTAAAC	0		0		0
YBR027C	YBR027C	2	278424	278756	-	GAGAGAAGGCTCGGATCTGCACTGACTTACTTTTTTTTGTTTTTTTGATG	ACGTACATTGTCATTTAAGAAGGTTCATAATCTGCCAATTACATTTGATA	GATGAGCTGAGGACGACATGTAACGTTTGAATGTGGGAAGCATCTTGTTA	GAGAGAAGGCTCGGATCTGCACTGACTTACTTTTTTTTGTTTTTTTGATGCGGATCCCCGGGTTAATTAA	ACGTACATTGTCATTTAAGAAGGTTCATAATCTGCCAATTACATTTGATACGGATCCCCGGGTTAATTAA	GATGAGCTGAGGACGACATGTAACGTTTGAATGTGGGAAGCATCTTGTTAGAATTCGAGCTCGTTTAAAC	0		0		0
YBR028C	YBR028C	2	278825	280402	-	TTTTTCATCAACCAATCTAGCTGAGCATACTGTTGGCAGTAATTAGGATG	TCAAGGGATTTAGTTATAAAGCAAGTGGTAGCTATTTGGAGAAGTACTTT	GTCAGTGCAGATCCGAGCCTTCTCTCTTAATCTATCTAACTTTTAATTCA	TTTTTCATCAACCAATCTAGCTGAGCATACTGTTGGCAGTAATTAGGATGCGGATCCCCGGGTTAATTAA	TCAAGGGATTTAGTTATAAAGCAAGTGGTAGCTATTTGGAGAAGTACTTTCGGATCCCCGGGTTAATTAA	GTCAGTGCAGATCCGAGCCTTCTCTCTTAATCTATCTAACTTTTAATTCAGAATTCGAGCTCGTTTAAAC	0		0		0
YBR029C	CDS1,CDG1	2	280765	282138	-	AACAGCGAACCTGTCATACTTAACTGTTCCACTTCCATATACCTAAAATG	AGTTGGCTGACATCTTTAATGTGACCAAGAAATCATTGACCAATCACTCT	AAACTATTCATACACTCATATATACTTTTATATGGTCTTTTTTATATTCA	AACAGCGAACCTGTCATACTTAACTGTTCCACTTCCATATACCTAAAATGCGGATCCCCGGGTTAATTAA	AGTTGGCTGACATCTTTAATGTGACCAAGAAATCATTGACCAATCACTCTCGGATCCCCGGGTTAATTAA	AAACTATTCATACACTCATATATACTTTTATATGGTCTTTTTTATATTCAGAATTCGAGCTCGTTTAAAC	0		0		0
YBR030W	YBR030W	2	282688	284340	+	TGTTGCCATATATAATAGCAATTAAAAAATAAATTTGAAAGAGTGAGATG	TTGCACAATCGGAGCATAATATCTTAGATAGATGTCTCAAGAGACTATCC	TCGTGTGACGTGATATTAATATAGTAAAAGTGCATATTCAATATTATTTA	TGTTGCCATATATAATAGCAATTAAAAAATAAATTTGAAAGAGTGAGATGCGGATCCCCGGGTTAATTAA	TTGCACAATCGGAGCATAATATCTTAGATAGATGTCTCAAGAGACTATCCCGGATCCCCGGGTTAATTAA	TCGTGTGACGTGATATTAATATAGTAAAAGTGCATATTCAATATTATTTAGAATTCGAGCTCGTTTAAAC	0		0		0
YBR031W	RPL4A	2	284550	285638	+	CATCACTTTTCTTGTAATTTAGCAATATCCCAAGAACAATCATCGAAATG	AGACTGGTACCAAGCCAGCTGCTGTTTTCACCGAAACTTTGAAACACGAT	TGTATGTATATAAAAAATAAAAGAATATTTTTAATGTACTAATAAGTTTA	CATCACTTTTCTTGTAATTTAGCAATATCCCAAGAACAATCATCGAAATGCGGATCCCCGGGTTAATTAA	AGACTGGTACCAAGCCAGCTGCTGTTTTCACCGAAACTTTGAAACACGATCGGATCCCCGGGTTAATTAA	TGTATGTATATAAAAAATAAAAGAATATTTTTAATGTACTAATAAGTTTAGAATTCGAGCTCGTTTAAAC	0		0		0
YBR032W	YBR032W	2	285901	286203	+	AAGGTTACATACAAGATTTCTTCAGCGTTTGTTACTTCAGGAAGGCAATG	ACACTCCATGCCAGTATCTGTATGTGTTTTTGCAGCAAGCACGACTGGAG	CAGAATCTTAATCTTATAGAGACAAATTTTGCTAACGTGACTCTTTATTA	AAGGTTACATACAAGATTTCTTCAGCGTTTGTTACTTCAGGAAGGCAATGCGGATCCCCGGGTTAATTAA	ACACTCCATGCCAGTATCTGTATGTGTTTTTGCAGCAAGCACGACTGGAGCGGATCCCCGGGTTAATTAA	CAGAATCTTAATCTTATAGAGACAAATTTTGCTAACGTGACTCTTTATTAGAATTCGAGCTCGTTTAAAC	0		0		0
YBR033W	EDS1	2	286326	289085	+	GTAGCCCGCTACGTAGAAATACATAACAATAGAATAATCTATCAAAAATG	GGAAATTGATGGATGATTCAGAATTGGGTTGTTGCTGTTGCTTCTTTAAC	ATCTATCCTTCATTAGGATGCTATTTTTCACCTTGTTATCATGAATATTA	GTAGCCCGCTACGTAGAAATACATAACAATAGAATAATCTATCAAAAATGCGGATCCCCGGGTTAATTAA	GGAAATTGATGGATGATTCAGAATTGGGTTGTTGCTGTTGCTTCTTTAACCGGATCCCCGGGTTAATTAA	ATCTATCCTTCATTAGGATGCTATTTTTCACCTTGTTATCATGAATATTAGAATTCGAGCTCGTTTAAAC	0		0		0
YBR034C	HMT1,RMT1,ODP1,HCP1	2	289311	290357	-	CGTTTCCAAAAAAGAGTTAGAACCGACAAATTCATCCAAAGAAAATAATG	TCGACGGTAATTCAAGAAGCAGAAAAAACGAAGGTTCTTATTTAATGCAT	GTTTATTTGCTTTTCAAATTTTTTTCTTTCTCCAGCAAACAAAAGTCTTA	CGTTTCCAAAAAAGAGTTAGAACCGACAAATTCATCCAAAGAAAATAATGCGGATCCCCGGGTTAATTAA	TCGACGGTAATTCAAGAAGCAGAAAAAACGAAGGTTCTTATTTAATGCATCGGATCCCCGGGTTAATTAA	GTTTATTTGCTTTTCAAATTTTTTTCTTTCTCCAGCAAACAAAAGTCTTAGAATTCGAGCTCGTTTAAAC	0		0		0
YBR035C	PDX3	2	290650	291336	-	GATACTCTACCTAGACCAGTAGCACACTTCACGGATCTGCACTGAAAATG	ACAGAAGAAAAACAGAAAACGATCCATGGAAAGTCGTTAGACTAGCCCCA	ATATGGTGTTAAATAGATCCGACATTGAATTTTTCATTAACAGTCCCTCA	GATACTCTACCTAGACCAGTAGCACACTTCACGGATCTGCACTGAAAATGCGGATCCCCGGGTTAATTAA	ACAGAAGAAAAACAGAAAACGATCCATGGAAAGTCGTTAGACTAGCCCCACGGATCCCCGGGTTAATTAA	ATATGGTGTTAAATAGATCCGACATTGAATTTTTCATTAACAGTCCCTCAGAATTCGAGCTCGTTTAAAC	0		0		0
YBR036C	CSG2,CLS2	2	293472	294704	-	TCTTGAGCTGGTGAGTTAGCACGATAACAAAACAAAGATACAGCGTCATG	TAAGTTTGTTGGTCCTATCAGTAACACTCGGGGAAGGTAAATACCACCAT	ATATGCTTGTTACATCATCATCAGTCATATAAAGTATGTTGTCCGTACTA	TCTTGAGCTGGTGAGTTAGCACGATAACAAAACAAAGATACAGCGTCATGCGGATCCCCGGGTTAATTAA	TAAGTTTGTTGGTCCTATCAGTAACACTCGGGGAAGGTAAATACCACCATCGGATCCCCGGGTTAATTAA	ATATGCTTGTTACATCATCATCAGTCATATAAAGTATGTTGTCCGTACTAGAATTCGAGCTCGTTTAAAC	0		0		0
YBR037C	SCO1,PET161	2	294956	295843	-	GTTCGTATAAGGCAAGGGAAACAGAAAAAACAGCAAACGTAGAAAAGATG	CAGAGCAGCGCGCCAAGCAGAAGGAGGCATGGTACTCCTTCTTATTTAAA	AAGTATATATGTATATACAAGGAAGAAAGTAGCATATATTTACAATCTTA	GTTCGTATAAGGCAAGGGAAACAGAAAAAACAGCAAACGTAGAAAAGATGCGGATCCCCGGGTTAATTAA	CAGAGCAGCGCGCCAAGCAGAAGGAGGCATGGTACTCCTTCTTATTTAAACGGATCCCCGGGTTAATTAA	AAGTATATATGTATATACAAGGAAGAAAGTAGCATATATTTACAATCTTAGAATTCGAGCTCGTTTAAAC	0		0		0
YBR038W	CHS2	2	296289	299180	+	GAAGTTACATATAGACCCAAATAAAAACCAAAGAACCACATATAGAAATG	CATGGGAAGTCTCTAAATTAGACTTACCAAATGTTTTCCACAAAAAGGGC	TGAGAAAAAAGAGGGAATGACGAGAAATTAGCTGAAAAATACTGGCATTA	GAAGTTACATATAGACCCAAATAAAAACCAAAGAACCACATATAGAAATGCGGATCCCCGGGTTAATTAA	CATGGGAAGTCTCTAAATTAGACTTACCAAATGTTTTCCACAAAAAGGGCCGGATCCCCGGGTTAATTAA	TGAGAAAAAAGAGGGAATGACGAGAAATTAGCTGAAAAATACTGGCATTAGAATTCGAGCTCGTTTAAAC	0		0		0
YBR039W	ATP3	2	299966	300901	+	TGGAAACAATTGAAGACGAGCAGTAAACATTATTTTATTTAGTAGTCATG	TCATTACTAATGAACTGGTTGATATTATTACTGGTGCTTCCTCTTTGGGA	TACAAAAACAACGTCAAATAAAGAGGCAATGCAGGGTGATTTTTTTATCA	TGGAAACAATTGAAGACGAGCAGTAAACATTATTTTATTTAGTAGTCATGCGGATCCCCGGGTTAATTAA	TCATTACTAATGAACTGGTTGATATTATTACTGGTGCTTCCTCTTTGGGACGGATCCCCGGGTTAATTAA	TACAAAAACAACGTCAAATAAAGAGGCAATGCAGGGTGATTTTTTTATCAGAATTCGAGCTCGTTTAAAC	0		0		0
YBR040W	FIG1	2	301359	302255	+	AACTATAGTAAACAAACAAACAAACAAACAAAAAAAAAAAAAAAAAAATG	ATAGGTACAATAACTACTCTTCGGATTCATCTACATTGCATTCCAAAGTT	ATTCTGAAATATCCGCTCATAACTTATATGTTTATTTGAGGATAAAACTA	AACTATAGTAAACAAACAAACAAACAAACAAAAAAAAAAAAAAAAAAATGCGGATCCCCGGGTTAATTAA	ATAGGTACAATAACTACTCTTCGGATTCATCTACATTGCATTCCAAAGTTCGGATCCCCGGGTTAATTAA	ATTCTGAAATATCCGCTCATAACTTATATGTTTATTTGAGGATAAAACTAGAATTCGAGCTCGTTTAAAC	0		0		0
YBR041W	FAT1	2	302657	304666	+	TTCAAACTCTATATCGTTGAACTTTTAATAGGCTGCGAATACCGACTATG	TCTTGACCGCTGCTGATTGGGAAGCCATCGATGCACAAACAATTAAATTA	ACTCTCGTGCAAGGAAAAATACTTTATCCTAATTCAGGAACATCAAATCA	TTCAAACTCTATATCGTTGAACTTTTAATAGGCTGCGAATACCGACTATGCGGATCCCCGGGTTAATTAA	TCTTGACCGCTGCTGATTGGGAAGCCATCGATGCACAAACAATTAAATTACGGATCCCCGGGTTAATTAA	ACTCTCGTGCAAGGAAAAATACTTTATCCTAATTCAGGAACATCAAATCAGAATTCGAGCTCGTTTAAAC	0		0		0
YBR042C	CST26	2	304807	306000	-	ATATCAGGTCCACTGGTATTGAGATTGCTAGCGAGGTCAATAAGCTGATG	CAACTCTAACAATAATTTGGTTAGTTTATAAACTTTATTGTTTTATTTTT	TCTATCTATATATGTACCTAATAACATATGGAAAGGATTATTTAAATTCA	ATATCAGGTCCACTGGTATTGAGATTGCTAGCGAGGTCAATAAGCTGATGCGGATCCCCGGGTTAATTAA	CAACTCTAACAATAATTTGGTTAGTTTATAAACTTTATTGTTTTATTTTTCGGATCCCCGGGTTAATTAA	TCTATCTATATATGTACCTAATAACATATGGAAAGGATTATTTAAATTCAGAATTCGAGCTCGTTTAAAC	0		0		0
YBR043C	QDR3,AQR2	2	306267	308336	-	TAACTTGTTAACGTCTATGCTAGGACCGAAGTCAGAAAGCGATAAACATG	ATTACTGGAGAGAGAACTACGACTTACAAAAATTGTACGACAAAATTGAT	AGTCTACAATGAAAATATTTACGCTTCCTTCTTATTAACCGATATGATTA	TAACTTGTTAACGTCTATGCTAGGACCGAAGTCAGAAAGCGATAAACATGCGGATCCCCGGGTTAATTAA	ATTACTGGAGAGAGAACTACGACTTACAAAAATTGTACGACAAAATTGATCGGATCCCCGGGTTAATTAA	AGTCTACAATGAAAATATTTACGCTTCCTTCTTATTAACCGATATGATTAGAATTCGAGCTCGTTTAAAC	0		0		0
YBR044C	TCM62	2	308728	310450	-	TCTCCCACACTACTGTAAACATAAAACTCTCTTATGCTTTAACGAGTATG	TACAATTATCACATGTGTATACAAAAAGCCTGAACGGCACAAAGCCTAGA	TCTATTTACAATGACTCATTCTGACTATTTAAAAGTATGTAAGGGCTTTA	TCTCCCACACTACTGTAAACATAAAACTCTCTTATGCTTTAACGAGTATGCGGATCCCCGGGTTAATTAA	TACAATTATCACATGTGTATACAAAAAGCCTGAACGGCACAAAGCCTAGACGGATCCCCGGGTTAATTAA	TCTATTTACAATGACTCATTCTGACTATTTAAAAGTATGTAAGGGCTTTAGAATTCGAGCTCGTTTAAAC	0		0		0
YBR045C	GIP1	2	312763	314485	-	CAGTTCGCAAATTTTTTGGTGAAGAGCTATTCAATTATTAGCTAATTATG	TCAATATACAGAGTATAAAAGGCAGAGAAATGAAGCAGAAAATTATAGAC	ATCCAAAGGATATTCTTTAGAATAGTACTTGCTTAGTTGCTCTCCTCTCA	CAGTTCGCAAATTTTTTGGTGAAGAGCTATTCAATTATTAGCTAATTATGCGGATCCCCGGGTTAATTAA	TCAATATACAGAGTATAAAAGGCAGAGAAATGAAGCAGAAAATTATAGACCGGATCCCCGGGTTAATTAA	ATCCAAAGGATATTCTTTAGAATAGTACTTGCTTAGTTGCTCTCCTCTCAGAATTCGAGCTCGTTTAAAC	0		0		0
YBR046C	ZTA1	2	314901	315905	-	GCTACTAGTAAGCATTAAGAGACGAGATCGCTAACAACAAGACAAAAATG	ACATAGAAAGTAGAAAAACTGTTGGTAAGCTAGTTCTTGAAATACCACAA	AAGGCAAGAAAGCTGTCCAAATTATTACGATAAATCAATATATGATTCTA	GCTACTAGTAAGCATTAAGAGACGAGATCGCTAACAACAAGACAAAAATGCGGATCCCCGGGTTAATTAA	ACATAGAAAGTAGAAAAACTGTTGGTAAGCTAGTTCTTGAAATACCACAACGGATCCCCGGGTTAATTAA	AAGGCAAGAAAGCTGTCCAAATTATTACGATAAATCAATATATGATTCTAGAATTCGAGCTCGTTTAAAC	0		0		0
YBR047W	FMP23	2	316227	316754	+	GTAAATCTTTGTTCTGTGGACATAACTGAAAAAAAATCAGTACATCAATG	TTGATGTCATGCTACAAGCCAAAGAAGTATTTGACAAAATGCAGAAAGAA	TAAAAAACTAACTGAATGAGTATAATTCAAATTTTTTATAGCTTTCTTCA	GTAAATCTTTGTTCTGTGGACATAACTGAAAAAAAATCAGTACATCAATGCGGATCCCCGGGTTAATTAA	TTGATGTCATGCTACAAGCCAAAGAAGTATTTGACAAAATGCAGAAAGAACGGATCCCCGGGTTAATTAA	TAAAAAACTAACTGAATGAGTATAATTCAAATTTTTTATAGCTTTCTTCAGAATTCGAGCTCGTTTAAAC	0		0		0
YBR048W	RPS11B	2	317225	318206	+	AGCATTTGCTGAAGACTTAGAGGAAACGTATCAAGCCAGGGAAAAAGATG	TCAAGGTCTCTGCTGCTGCCGGTAAGGCCAACAAGCAATTTGCTAAATTT	GTTTTATCCTCCACTTATTATTATATCATCTTGTTAATTTTATTTCTTTA	AGCATTTGCTGAAGACTTAGAGGAAACGTATCAAGCCAGGGAAAAAGATGCGGATCCCCGGGTTAATTAA	TCAAGGTCTCTGCTGCTGCCGGTAAGGCCAACAAGCAATTTGCTAAATTTCGGATCCCCGGGTTAATTAA	GTTTTATCCTCCACTTATTATTATATCATCTTGTTAATTTTATTTCTTTAGAATTCGAGCTCGTTTAAAC	0		0		0
YBR049C	REB1,GRF2	2	318778	321210	-	GAACTCACGTGTTGCTGCTGAATTAGAATATTTATAGCTCAATCAATATG	AAGAGCTAGTTGATTATTTTAGCTCCAATATTTCAATGAAAACAGAAAAT	TCAAACATTATTGAGTTTTTCGCTTTCACCAATTATATTTTCTGGAATTA	GAACTCACGTGTTGCTGCTGAATTAGAATATTTATAGCTCAATCAATATGCGGATCCCCGGGTTAATTAA	AAGAGCTAGTTGATTATTTTAGCTCCAATATTTCAATGAAAACAGAAAATCGGATCCCCGGGTTAATTAA	TCAAACATTATTGAGTTTTTCGCTTTCACCAATTATATTTTCTGGAATTAGAATTCGAGCTCGTTTAAAC	0		0		0
YBR050C	REG2	2	321575	322591	-	TATATTGGAATAAGAAAAAAGAAATAGGAACAAGAAAGTGTGTGAGAATG	AAAATGACATTGACGCTTACATAGACACCAGTATACCCAACCTGCTCCTA	GAAGAAAATGAGACACAATTTCAATGTATTGAAAGTTTACGTAAAATTTA	TATATTGGAATAAGAAAAAAGAAATAGGAACAAGAAAGTGTGTGAGAATGCGGATCCCCGGGTTAATTAA	AAAATGACATTGACGCTTACATAGACACCAGTATACCCAACCTGCTCCTACGGATCCCCGGGTTAATTAA	GAAGAAAATGAGACACAATTTCAATGTATTGAAAGTTTACGTAAAATTTAGAATTCGAGCTCGTTTAAAC	1	YBR051W	1	YBR051W	0
YBR051W	YBR051W	2	322380	322730	+	TTCTTTGCTCGTGAAAGTCGAAATTTTTCTTCTTAACTGCTGGCAACATG	AGTTTCGAGACAACGCTAAATTTGACGGACATGCGAAGACATGCCATATA	AAAATAGTTATTGCTTCTTGAGTTGCAGCTTCTTCCTGGACGTACTGTTA	TTCTTTGCTCGTGAAAGTCGAAATTTTTCTTCTTAACTGCTGGCAACATGCGGATCCCCGGGTTAATTAA	AGTTTCGAGACAACGCTAAATTTGACGGACATGCGAAGACATGCCATATACGGATCCCCGGGTTAATTAA	AAAATAGTTATTGCTTCTTGAGTTGCAGCTTCTTCCTGGACGTACTGTTAGAATTCGAGCTCGTTTAAAC	1	YBR050C	1	YBR050C	0
YBR052C	RFS1	2	323112	323744	-	CCAGCATACTACTCACTATTATCAGCACATACTACGCCACATAGATAATG	GAGTTCACCAACTTCAAGGGAAGGCCTTTTACGACCGTATCAAAGATTTG	ATGTTACAGTTATACCATATCGTACTTATGTAAAGATATATACGGTTTTA	CCAGCATACTACTCACTATTATCAGCACATACTACGCCACATAGATAATGCGGATCCCCGGGTTAATTAA	GAGTTCACCAACTTCAAGGGAAGGCCTTTTACGACCGTATCAAAGATTTGCGGATCCCCGGGTTAATTAA	ATGTTACAGTTATACCATATCGTACTTATGTAAAGATATATACGGTTTTAGAATTCGAGCTCGTTTAAAC	0		0		0
YBR053C	YBR053C	2	324067	325143	-	CTTAGATTAAGTTTATATGCATTGAGCAACTAGACACTTTTTGTAAAATG	TGCTAGACGGAAATGTTCCTCTGGAATCTACAAAGCGACAACCTCTCCAC	TGCGCTGGATACGTATGCTGCATATATATAAACATATGTATATACACCTA	CTTAGATTAAGTTTATATGCATTGAGCAACTAGACACTTTTTGTAAAATGCGGATCCCCGGGTTAATTAA	TGCTAGACGGAAATGTTCCTCTGGAATCTACAAAGCGACAACCTCTCCACCGGATCCCCGGGTTAATTAA	TGCGCTGGATACGTATGCTGCATATATATAAACATATGTATATACACCTAGAATTCGAGCTCGTTTAAAC	0		0		0
YBR054W	YRO2	2	327495	328520	+	TTCCTGATAACTTAAAGTGACACTATTTTTTTAAAAAAAGCATCAAAATG	AGGCCAAGAAGGCCCAAGAAGAGGAGGAGGATGTAGCCACCGACTCTGAG	CGGAAAAAGAAGGAAAAAAACATTGCTACATCAGCAGATCAAAGCATTTA	TTCCTGATAACTTAAAGTGACACTATTTTTTTAAAAAAAGCATCAAAATGCGGATCCCCGGGTTAATTAA	AGGCCAAGAAGGCCCAAGAAGAGGAGGAGGATGTAGCCACCGACTCTGAGCGGATCCCCGGGTTAATTAA	CGGAAAAAGAAGGAAAAAAACATTGCTACATCAGCAGATCAAAGCATTTAGAATTCGAGCTCGTTTAAAC	0		0		0
YBR055C	PRP6,TSM7269,RNA6	2	328982	331681	-	GGGTGAGTTGACATAAAGAGTTTAACAGCAAGAAAACGTCACATTTTATG	TGCAATACTGCACACCTAGAGAGATTTTATTGCGCTTGATGAATGACAAA	AAATATACGCGCAGGCTAAGTAGAAAACAACGCAAGATAGAATTACTTTA	GGGTGAGTTGACATAAAGAGTTTAACAGCAAGAAAACGTCACATTTTATGCGGATCCCCGGGTTAATTAA	TGCAATACTGCACACCTAGAGAGATTTTATTGCGCTTGATGAATGACAAACGGATCCCCGGGTTAATTAA	AAATATACGCGCAGGCTAAGTAGAAAACAACGCAAGATAGAATTACTTTAGAATTCGAGCTCGTTTAAAC	0		0		0
YBR056W	YBR056W	2	332259	333764	+	CTCTCTATCCATCTATAAAATTTAGTAAAACTTTTGAACTGCACAGAATG	GGGAATGGGATCAAGGCTACCAACGTGGGTTAGATGAGTTTAATAAGTAT	AAAGAATAGAAACGCCAATAGTTAGTATATATGTGTTTGTATATTTCTTA	CTCTCTATCCATCTATAAAATTTAGTAAAACTTTTGAACTGCACAGAATGCGGATCCCCGGGTTAATTAA	GGGAATGGGATCAAGGCTACCAACGTGGGTTAGATGAGTTTAATAAGTATCGGATCCCCGGGTTAATTAA	AAAGAATAGAAACGCCAATAGTTAGTATATATGTGTTTGTATATTTCTTAGAATTCGAGCTCGTTTAAAC	0		0		0
YBR056W-A	YBR056W-A	2	336479	336679	+	CCTTGTACTTTGAGAAATATCATCAAAAAAAAAAGTGCGACATCACAATG	TATGTTGTCTGTGTCTAATTGATCTATGTTGTAGCTGCGCTGGCGGCATG	TACTCCACGAAGAAAAGCGTTTATGATGATACAAGGCAAACCACAGCTTA	CCTTGTACTTTGAGAAATATCATCAAAAAAAAAAGTGCGACATCACAATGCGGATCCCCGGGTTAATTAA	TATGTTGTCTGTGTCTAATTGATCTATGTTGTAGCTGCGCTGGCGGCATGCGGATCCCCGGGTTAATTAA	TACTCCACGAAGAAAAGCGTTTATGATGATACAAGGCAAACCACAGCTTAGAATTCGAGCTCGTTTAAAC	1	YBR056C-B	1	YBR056C-B	0
YBR056C-B	YBR056C-B	2	336517	336675	-	CCACGAAGAAAAGCGTTTATGATGATACAAGGCAAACCACAGCTTACATG	TTCTTGGTGGTGGCGGCCCTTGTTGTATGTATATAGGTTGCGGTTGTGGT	GACATCACAATGAGACATCAATACTATCAACCACAACCGATGTATTATCA	CCACGAAGAAAAGCGTTTATGATGATACAAGGCAAACCACAGCTTACATGCGGATCCCCGGGTTAATTAA	TTCTTGGTGGTGGCGGCCCTTGTTGTATGTATATAGGTTGCGGTTGTGGTCGGATCCCCGGGTTAATTAA	GACATCACAATGAGACATCAATACTATCAACCACAACCGATGTATTATCAGAATTCGAGCTCGTTTAAAC	1	YBR056W-A	1	YBR056W-A	0
YBR057C	MUM2,SPOT8	2	337410	338510	-	CCTCATTCTTTTTGCATACACGGCTCGTTTGGAATACTGTTGTAAAAATG	TGGAAGCCCATTTGGCTTCAAAGGAGTCTTCAAAGGAGGACGTTGCTAAT	CGTTTTTTAGAATTAGCCATATGTTCTCGATAATGAGTAAACCTCTTTCA	CCTCATTCTTTTTGCATACACGGCTCGTTTGGAATACTGTTGTAAAAATGCGGATCCCCGGGTTAATTAA	TGGAAGCCCATTTGGCTTCAAAGGAGTCTTCAAAGGAGGACGTTGCTAATCGGATCCCCGGGTTAATTAA	CGTTTTTTAGAATTAGCCATATGTTCTCGATAATGAGTAAACCTCTTTCAGAATTCGAGCTCGTTTAAAC	0		0		0
YBR058C	UBP14,GID6	2	338864	341208	-	ATAAGTTCATCCAAAAAGAGAGCCCGAAGTCTTTCTCACATTCAGAAATG	GCATTGAAGATATGAAAAAAAATGGTTATATTTATTTCTATACAAGATGC	TATATATATATATGTGTGTGTGTGTGTGTGTGTGTGTAAACGTTCTTTTA	ATAAGTTCATCCAAAAAGAGAGCCCGAAGTCTTTCTCACATTCAGAAATGCGGATCCCCGGGTTAATTAA	GCATTGAAGATATGAAAAAAAATGGTTATATTTATTTCTATACAAGATGCCGGATCCCCGGGTTAATTAA	TATATATATATATGTGTGTGTGTGTGTGTGTGTGTGTAAACGTTCTTTTAGAATTCGAGCTCGTTTAAAC	0		0		0
YBR058C-A	TSC3	2	341515	341757	-	TGTAGAAACCGGAAGAACAAAGGTGGAACATATCATAAGGGGAAGAAATG	TCACAATTTTCAGTTTGAGTTTCTTCGGTATACTAAAGTATTGCTTCCTT	CCTCCAGCTTATACTATTATTAACCGAATAAGGATATAAATAATCATTCA	TGTAGAAACCGGAAGAACAAAGGTGGAACATATCATAAGGGGAAGAAATGCGGATCCCCGGGTTAATTAA	TCACAATTTTCAGTTTGAGTTTCTTCGGTATACTAAAGTATTGCTTCCTTCGGATCCCCGGGTTAATTAA	CCTCCAGCTTATACTATTATTAACCGAATAAGGATATAAATAATCATTCAGAATTCGAGCTCGTTTAAAC	0		0		0
YBR059C	AKL1	2	342052	345378	-	GTTTTCGTCCCTGTCGCCTGTTATTTTCTTTCTAATTAGCACTGATCATG	GCAGTAACGGGAAAAGGAGATCTTTTTTCTCAGTCTTTAGAAGCGAGAAA	ATGTAACAATGTATGTATATGATTTTATATGTGCTCTATTTATCGAATCA	GTTTTCGTCCCTGTCGCCTGTTATTTTCTTTCTAATTAGCACTGATCATGCGGATCCCCGGGTTAATTAA	GCAGTAACGGGAAAAGGAGATCTTTTTTCTCAGTCTTTAGAAGCGAGAAACGGATCCCCGGGTTAATTAA	ATGTAACAATGTATGTATATGATTTTATATGTGCTCTATTTATCGAATCAGAATTCGAGCTCGTTTAAAC	0		0		0
YBR060C	ORC2,SIR5,RRR1	2	345843	347705	-	GCTATATCTTTAAAACAAGTTTTTGTAGTACTGCGAATTGCCATAACATG	ACACGTATGCGGAACTTGAAAAACTTCTGAAAACCGTTTTAAATACTCTA	AGCTAGCAAGCCTAGTACTATTACAATTGTTCGTGATATGTATACATTTA	GCTATATCTTTAAAACAAGTTTTTGTAGTACTGCGAATTGCCATAACATGCGGATCCCCGGGTTAATTAA	ACACGTATGCGGAACTTGAAAAACTTCTGAAAACCGTTTTAAATACTCTACGGATCCCCGGGTTAATTAA	AGCTAGCAAGCCTAGTACTATTACAATTGTTCGTGATATGTATACATTTAGAATTCGAGCTCGTTTAAAC	0		0		0
YBR061C	TRM7	2	349974	350906	-	ACAACAGTAGATGAGTACAAGGCAAGCTTAAAAAGAAAGTATTCAAGATG	ACAAGAAAGCTTTGGAATTAAAAAGGAGCGGGAAACTCACTAGATCAGTT	ATGTAGTGACTTATTTAATTGTTTGATTAGAGGTAGTAATATTGCAATCA	ACAACAGTAGATGAGTACAAGGCAAGCTTAAAAAGAAAGTATTCAAGATGCGGATCCCCGGGTTAATTAA	ACAAGAAAGCTTTGGAATTAAAAAGGAGCGGGAAACTCACTAGATCAGTTCGGATCCCCGGGTTAATTAA	ATGTAGTGACTTATTTAATTGTTTGATTAGAGGTAGTAATATTGCAATCAGAATTCGAGCTCGTTTAAAC	0		0		0
YBR062C	YBR062C	2	351163	351787	-	GAAATAATAGAAAGATATATTCATCAAACATAATCACAATCAAAAAAATG	AGATTGATACAACTGAAGCAGAACTGGAAGAAGATTGGGGTATGTACGGT	CTATTCTACTTAGGTTTGGTGTCTTTATATAATATAAAAGAAAGATATTA	GAAATAATAGAAAGATATATTCATCAAACATAATCACAATCAAAAAAATGCGGATCCCCGGGTTAATTAA	AGATTGATACAACTGAAGCAGAACTGGAAGAAGATTGGGGTATGTACGGTCGGATCCCCGGGTTAATTAA	CTATTCTACTTAGGTTTGGTGTCTTTATATAATATAAAAGAAAGATATTAGAATTCGAGCTCGTTTAAAC	0		0		0
YBR063C	YBR063C	2	352157	353371	-	GATTTCTGATAGCTCTTTTTTTTCCAATATCGATAAAAAACTAAAATATG	TTAATGATAAAGGCGCAACTTCGATTCTACTGTGGTACTCTAACTATTCA	GTTGGCATATCTTACATTTTCCGGATTATGTATCAAATAAACTTTATCTA	GATTTCTGATAGCTCTTTTTTTTCCAATATCGATAAAAAACTAAAATATGCGGATCCCCGGGTTAATTAA	TTAATGATAAAGGCGCAACTTCGATTCTACTGTGGTACTCTAACTATTCACGGATCCCCGGGTTAATTAA	GTTGGCATATCTTACATTTTCCGGATTATGTATCAAATAAACTTTATCTAGAATTCGAGCTCGTTTAAAC	1	YBR064W	1	YBR064W	0
YBR064W	YBR064W	2	352950	353378	+	TAACGTCACTTCGATTATTGAGGCAGTCTTCATTAAAGTTTATTACAATG	AGCCATATTCATATGGAAAAGTGCTTTTTAAACCTAGTTCCTCCATATTT	ATTGACTGATTTCTGATAGCTCTTTTTTTTCCAATATCGATAAAAAACTA	TAACGTCACTTCGATTATTGAGGCAGTCTTCATTAAAGTTTATTACAATGCGGATCCCCGGGTTAATTAA	AGCCATATTCATATGGAAAAGTGCTTTTTAAACCTAGTTCCTCCATATTTCGGATCCCCGGGTTAATTAA	ATTGACTGATTTCTGATAGCTCTTTTTTTTCCAATATCGATAAAAAACTAGAATTCGAGCTCGTTTAAAC	1	YBR063C	1	YBR063C	0
YBR065C	ECM2,SLT11	2	353771	354865	-	TGAATAGAAGGTAGCTAACGGAAAAGAGTTATTACACCCTTAATATAATG	ATAAGGCCAGATCAAAGAAATCGAAACCTCGCGCTAACAAGTTAACAATA	GATCAAACAGTTCGTTTCTTCAACCCATAATTTTTCTTACGTTTCATCTA	TGAATAGAAGGTAGCTAACGGAAAAGAGTTATTACACCCTTAATATAATGCGGATCCCCGGGTTAATTAA	ATAAGGCCAGATCAAAGAAATCGAAACCTCGCGCTAACAAGTTAACAATACGGATCCCCGGGTTAATTAA	GATCAAACAGTTCGTTTCTTCAACCCATAATTTTTCTTACGTTTCATCTAGAATTCGAGCTCGTTTAAAC	0		0		0
YBR066C	NRG2	2	355226	355888	-	CTACTGTTCGAAGAACAAAAAATATAAAGCTTCTACAAAATTTCCAGATG	CTCATGCAAACAAGAAGAAAAGAAACTGGAAGAGGAGGGAGGCTAGCAGT	TGTACGTTATTTGAATATTTAAATGTTTTTGGCTGAGCTCACTCACATCA	CTACTGTTCGAAGAACAAAAAATATAAAGCTTCTACAAAATTTCCAGATGCGGATCCCCGGGTTAATTAA	CTCATGCAAACAAGAAGAAAAGAAACTGGAAGAGGAGGGAGGCTAGCAGTCGGATCCCCGGGTTAATTAA	TGTACGTTATTTGAATATTTAAATGTTTTTGGCTGAGCTCACTCACATCAGAATTCGAGCTCGTTTAAAC	0		0		0
YBR067C	TIP1	2	357292	357996	-	ACAATAATTGCTATTGCATAACTATACCCTCTGCTAAATAAAATAAAATG	GCGCTGCCTCTTTCGGTGCTGTTGTTGCAGGTGCAGCTGCTTTATTGTTA	TAATAATGGAGGTAATTTTTCAAATATTTGTTGTAAAAGGTTCCCTTTTA	ACAATAATTGCTATTGCATAACTATACCCTCTGCTAAATAAAATAAAATGCGGATCCCCGGGTTAATTAA	GCGCTGCCTCTTTCGGTGCTGTTGTTGCAGGTGCAGCTGCTTTATTGTTACGGATCCCCGGGTTAATTAA	TAATAATGGAGGTAATTTTTCAAATATTTGTTGTAAAAGGTTCCCTTTTAGAATTCGAGCTCGTTTAAAC	0		0		0
YBR068C	BAP2	2	359122	360951	-	ATACTATCAATTTATTTAGCTTCAATAAAACTCAAGTGATTTTAGAAATG	AAAAACTAAGAAATATGTCTTTGATGAGAAAAGCTTATCATTTCTGGTGT	AACCGGCTCTAATGGGAAGTGTCCAGACCTGGGTGGTGTAGTTAAGTTTA	ATACTATCAATTTATTTAGCTTCAATAAAACTCAAGTGATTTTAGAAATGCGGATCCCCGGGTTAATTAA	AAAAACTAAGAAATATGTCTTTGATGAGAAAAGCTTATCATTTCTGGTGTCGGATCCCCGGGTTAATTAA	AACCGGCTCTAATGGGAAGTGTCCAGACCTGGGTGGTGTAGTTAAGTTTAGAATTCGAGCTCGTTTAAAC	0		0		0
YBR069C	TAT1,VAP1	2	361835	363694	-	TTACCACCGTAGCTACCTAATATAGTTTCTCGATAAAAGGCGTAAAAATG	ACAGCTCGCGTTCAAGAAAGTTTTTTAAGAGGATGACCAATTTCTGGTGC	GCAACGAAAGCCCGATGAAGCCAAGCGGAAAATGAATGGAATTGCTGTTA	TTACCACCGTAGCTACCTAATATAGTTTCTCGATAAAAGGCGTAAAAATGCGGATCCCCGGGTTAATTAA	ACAGCTCGCGTTCAAGAAAGTTTTTTAAGAGGATGACCAATTTCTGGTGCCGGATCCCCGGGTTAATTAA	GCAACGAAAGCCCGATGAAGCCAAGCGGAAAATGAATGGAATTGCTGTTAGAATTCGAGCTCGTTTAAAC	0		0		0
YBR070C	ALG14	2	364480	365193	-	CGGTTTACTATTGTATCAGGAAAGTCGAAAGAAGTGACTTGAAGATCATG	AATTGAGGGACAATTATTTACCAAGATCCAAGTGGTTCGGCGTCCTTGTT	ACTTCAAAAATAGTTGGAAGTTTTACTATCCTACATAAATGGTTTACTTA	CGGTTTACTATTGTATCAGGAAAGTCGAAAGAAGTGACTTGAAGATCATGCGGATCCCCGGGTTAATTAA	AATTGAGGGACAATTATTTACCAAGATCCAAGTGGTTCGGCGTCCTTGTTCGGATCCCCGGGTTAATTAA	ACTTCAAAAATAGTTGGAAGTTTTACTATCCTACATAAATGGTTTACTTAGAATTCGAGCTCGTTTAAAC	0		0		0
YBR071W	YBR071W	2	365669	366307	+	CATACCAACTATATATTGTGACGGCACAAAAAGACAAAATACGTAAAATG	TGGACAACCTGGATATGGGTTCCAGTAGAAGGACATCGTTGGACTTTTTT	CGAATTGTCCAACATCAACAACAAAGTGTGTCCTATGGTAGGTTATATTA	CATACCAACTATATATTGTGACGGCACAAAAAGACAAAATACGTAAAATGCGGATCCCCGGGTTAATTAA	TGGACAACCTGGATATGGGTTCCAGTAGAAGGACATCGTTGGACTTTTTTCGGATCCCCGGGTTAATTAA	CGAATTGTCCAACATCAACAACAAAGTGTGTCCTATGGTAGGTTATATTAGAATTCGAGCTCGTTTAAAC	0		0		0
YBR072W	HSP26	2	367272	367916	+	TAAAACAGGTATCCAAAAAAGCAAACAAACAAACTAAACAAATTAACATG	AGAACCACGTCAAGAAGATTGAAGTTTCTTCTCAAGAATCGTGGGGTAAC	CAACAATGGTCCTCGCGAGAGGGACAACACTATAGAGCCAGGTCACTTTA	TAAAACAGGTATCCAAAAAAGCAAACAAACAAACTAAACAAATTAACATGCGGATCCCCGGGTTAATTAA	AGAACCACGTCAAGAAGATTGAAGTTTCTTCTCAAGAATCGTGGGGTAACCGGATCCCCGGGTTAATTAA	CAACAATGGTCCTCGCGAGAGGGACAACACTATAGAGCCAGGTCACTTTAGAATTCGAGCTCGTTTAAAC	0		0		0
YBR072C-A	YBR072C-A	2	368102	368264	-	TTCTTTTTTTTTTTTTAGCTCTTCGCGTTTTATTTTTTATTTTCTTGATG	TAAAGATTTTGGTAAGTACAAGAACGAGGTTAAATTCCTTCGTTAAAACT	AGTTATAAAAGCTTGCTTTGGCTTCGATATATGACCGTTATTTTTGACTA	TTCTTTTTTTTTTTTTAGCTCTTCGCGTTTTATTTTTTATTTTCTTGATGCGGATCCCCGGGTTAATTAA	TAAAGATTTTGGTAAGTACAAGAACGAGGTTAAATTCCTTCGTTAAAACTCGGATCCCCGGGTTAATTAA	AGTTATAAAAGCTTGCTTTGGCTTCGATATATGACCGTTATTTTTGACTAGAATTCGAGCTCGTTTAAAC	0		0		0
YBR073W	RDH54,TID1	2	368459	371233	+	AAACAGCTCGGGTATATCAAACGGTATTTGATTCCGGTACTACTCAAATG	GTATTACCTTTGCGTTTGTAAAGCCCGGCGAGATATGTCTCAGAGAACAA	ATTAAATAATAGCTATTTTATTAGTATATAAGTGTCCATATTTGGCGTCA	AAACAGCTCGGGTATATCAAACGGTATTTGATTCCGGTACTACTCAAATGCGGATCCCCGGGTTAATTAA	GTATTACCTTTGCGTTTGTAAAGCCCGGCGAGATATGTCTCAGAGAACAACGGATCCCCGGGTTAATTAA	ATTAAATAATAGCTATTTTATTAGTATATAAGTGTCCATATTTGGCGTCAGAATTCGAGCTCGTTTAAAC	0		0		0
YBR074W	YBR074W	2	371531	374461	+	TTATCTACAAGGAAATAAATTGATAGGTAAAGTTAAAGAATCACGGCATG	TTACCAACGAACAGAAAGGATTAGTTATTGTCAAGGATGCTATAATTTTA	TAGGCGAATTTGAGTTTATAGGAATTTACATTTAAAACTAATTAGAATTA	TTATCTACAAGGAAATAAATTGATAGGTAAAGTTAAAGAATCACGGCATGCGGATCCCCGGGTTAATTAA	TTACCAACGAACAGAAAGGATTAGTTATTGTCAAGGATGCTATAATTTTACGGATCCCCGGGTTAATTAA	TAGGCGAATTTGAGTTTATAGGAATTTACATTTAAAACTAATTAGAATTAGAATTCGAGCTCGTTTAAAC	0		0		0
YBR076W	ECM8	2	375622	376641	+	TGACTCTTCAACATCCACTCTTTCGAGGGTTTTAACGGACACCACGAATG	AATTTGCCGCTAGTAACGAACTAAACGATTACGAGACGGCTGATAAATAC	GGTAACCGTTATAAATTTAAAGCGTTTCTTCGCTAGGATGGTGAATATTA	TGACTCTTCAACATCCACTCTTTCGAGGGTTTTAACGGACACCACGAATGCGGATCCCCGGGTTAATTAA	AATTTGCCGCTAGTAACGAACTAAACGATTACGAGACGGCTGATAAATACCGGATCCCCGGGTTAATTAA	GGTAACCGTTATAAATTTAAAGCGTTTCTTCGCTAGGATGGTGAATATTAGAATTCGAGCTCGTTTAAAC	1	YBR076C-A	1	YBR076C-A	0
YBR076C-A	YBR076C-A	2	376598	376863	-	GATTACGCGGATTGCCGTGGTGCACTTTCGTGCACTCGCACATATATATG	TGGTGAATATTAGTATTTATCAGCCGTCTCGTAATCGTTTAGTTCGTTAC	GATATTAAAAATAAATGATCATATAACAAATCAAACAAAATTTGCCGCTA	GATTACGCGGATTGCCGTGGTGCACTTTCGTGCACTCGCACATATATATGCGGATCCCCGGGTTAATTAA	TGGTGAATATTAGTATTTATCAGCCGTCTCGTAATCGTTTAGTTCGTTACCGGATCCCCGGGTTAATTAA	GATATTAAAAATAAATGATCATATAACAAATCAAACAAAATTTGCCGCTAGAATTCGAGCTCGTTTAAAC	1	YBR076W	1	YBR076W	0
YBR077C	SLM4,GSE1,NIR1,EGO3	2	377051	377539	-	AAAAGGCAGTTATCAGCAGCAAACGGTATCCAAAATATTGAAGCAATATG	TTGAAAGAGCTATGAGAGAGTTAACTGATTTGTTTGGCTACAAGCTAGGT	CGGAGACGCATGAAAAGGTGTGGCCTCGATACATATTGTTAAACCCATCA	AAAAGGCAGTTATCAGCAGCAAACGGTATCCAAAATATTGAAGCAATATGCGGATCCCCGGGTTAATTAA	TTGAAAGAGCTATGAGAGAGTTAACTGATTTGTTTGGCTACAAGCTAGGTCGGATCCCCGGGTTAATTAA	CGGAGACGCATGAAAAGGTGTGGCCTCGATACATATTGTTAAACCCATCAGAATTCGAGCTCGTTTAAAC	0		0		0
YBR078W	ECM33	2	378387	380123	+	TTATTTGACTTTTAAAGATCTAGTTTTAATTTTACTATTATTCCGCAATG	TCCTTTTTTATTATGAGACGGTTGGTTCATCACTGAATTTTATATGTAGA	ATATAGTAACAATAAGAAATAAAAGAGATATTAATGACACTAAAATTTTA	TTATTTGACTTTTAAAGATCTAGTTTTAATTTTACTATTATTCCGCAATGCGGATCCCCGGGTTAATTAA	TCCTTTTTTATTATGAGACGGTTGGTTCATCACTGAATTTTATATGTAGACGGATCCCCGGGTTAATTAA	ATATAGTAACAATAAGAAATAAAAGAGATATTAATGACACTAAAATTTTAGAATTCGAGCTCGTTTAAAC	0		0		0
YBR079C	RPG1,TIF32	2	380647	383541	-	AGAGAGAGTTTCAAAATAAACCATACAAACGCTCAGGAAACATCAAGATG	TGACTATGGCTGAAAAGTTGAGAGCCAAGAGATTGGCCAAGGGGGGCAGG	CGTATAAAAAACAGTATAAATTAAGTAGATCATTTTTGCGTTGTCTGTTA	AGAGAGAGTTTCAAAATAAACCATACAAACGCTCAGGAAACATCAAGATGCGGATCCCCGGGTTAATTAA	TGACTATGGCTGAAAAGTTGAGAGCCAAGAGATTGGCCAAGGGGGGCAGGCGGATCCCCGGGTTAATTAA	CGTATAAAAAACAGTATAAATTAAGTAGATCATTTTTGCGTTGTCTGTTAGAATTCGAGCTCGTTTAAAC	0		0		0
YBR080C	SEC18,ANU4	2	383878	386154	-	AAGATAAGAGCAAATAGTACCGTATATTCAACCTTTATAAATTGAGTATG	ACGATGAAGATCCCGTGAACGAGCTTGTTGAGTTGATGACCCAATCCGCA	GAAGGGATAAAGAATAAAAATACAAGGACATGAAAAATTTGAAATAATTA	AAGATAAGAGCAAATAGTACCGTATATTCAACCTTTATAAATTGAGTATGCGGATCCCCGGGTTAATTAA	ACGATGAAGATCCCGTGAACGAGCTTGTTGAGTTGATGACCCAATCCGCACGGATCCCCGGGTTAATTAA	GAAGGGATAAAGAATAAAAATACAAGGACATGAAAAATTTGAAATAATTAGAATTCGAGCTCGTTTAAAC	0		0		0
YBR081C	SPT7,GIT2	2	386517	390515	-	TGGTTACTCTTTAAACTGTAACATTACAAAGAAATTAAGTCTGAATAATG	ATATGGGCAGCAATAGTTCATTTAGCTTGAGCCTTCCTCGCCTTAATCAA	AAATGTATTTAATTAAAGATAAAATATTCAACTATTTAGCGCGCTCATTA	TGGTTACTCTTTAAACTGTAACATTACAAAGAAATTAAGTCTGAATAATGCGGATCCCCGGGTTAATTAA	ATATGGGCAGCAATAGTTCATTTAGCTTGAGCCTTCCTCGCCTTAATCAACGGATCCCCGGGTTAATTAA	AAATGTATTTAATTAAAGATAAAATATTCAACTATTTAGCGCGCTCATTAGAATTCGAGCTCGTTTAAAC	0		0		0
YBR082C	UBC4	2	391891	392432	-	ATTTCACTGACTATAGAGTACATACATAAACAAGCATCCAAAAAAACATG	GACCCAAGTACGAAGCTACAGCCAGAGAATGGACAAAGAAATACGCTGTA	CCCATATAAATCTTGCTTCTCTTTTTCAGCTGAGTAAGGACTTCTGTTTA	ATTTCACTGACTATAGAGTACATACATAAACAAGCATCCAAAAAAACATGCGGATCCCCGGGTTAATTAA	GACCCAAGTACGAAGCTACAGCCAGAGAATGGACAAAGAAATACGCTGTACGGATCCCCGGGTTAATTAA	CCCATATAAATCTTGCTTCTCTTTTTCAGCTGAGTAAGGACTTCTGTTTAGAATTCGAGCTCGTTTAAAC	0		0		0
YBR083W	TEC1,ROC1	2	394430	395890	+	AAGAAGAATAATCCACCTATTTCAACAGTTCTGATACCTGTTTAACCATG	CACATCAAAGGAACTTTACGCCATCCAACCAATCGCATGGGAACTTTTAT	ATACGTATGCGTATTTATGTACGAGATGTATGTATGTATGTAGACATTTA	AAGAAGAATAATCCACCTATTTCAACAGTTCTGATACCTGTTTAACCATGCGGATCCCCGGGTTAATTAA	CACATCAAAGGAACTTTACGCCATCCAACCAATCGCATGGGAACTTTTATCGGATCCCCGGGTTAATTAA	ATACGTATGCGTATTTATGTACGAGATGTATGTATGTATGTAGACATTTAGAATTCGAGCTCGTTTAAAC	0		0		0
YBR084W	MIS1	2	396315	399242	+	GATTCTCTCAGTCTGTTCATTTGTCAGATATTTAAGGCTAAAAGGAAATG	GTTACATGGCAGTAGAAGTCGACGACGACGGTGAAATTGAAGGTCTATTT	ACGGACATCGAGGTCGAATTGATGCCATTAGGAGTCTGCCAAACTATTTA	GATTCTCTCAGTCTGTTCATTTGTCAGATATTTAAGGCTAAAAGGAAATGCGGATCCCCGGGTTAATTAA	GTTACATGGCAGTAGAAGTCGACGACGACGGTGAAATTGAAGGTCTATTTCGGATCCCCGGGTTAATTAA	ACGGACATCGAGGTCGAATTGATGCCATTAGGAGTCTGCCAAACTATTTAGAATTCGAGCTCGTTTAAAC	0		0		0
YBR084C-A	RPL19A	2	399447	400523	-	GATTTTACGCTTCACATAGAAAGTTGATTAAGAACTCCAAAGCAAAAATG	GAGCTCAAAGAGTTGCTGAAAAGAGAGATGCTTTATTGAAGGAAGACGCT	GTTTATTAACTGAGTATGTATAGTAAGATAAATTAATTAAAGAAAATTTA	GATTTTACGCTTCACATAGAAAGTTGATTAAGAACTCCAAAGCAAAAATGCGGATCCCCGGGTTAATTAA	GAGCTCAAAGAGTTGCTGAAAAGAGAGATGCTTTATTGAAGGAAGACGCTCGGATCCCCGGGTTAATTAA	GTTTATTAACTGAGTATGTATAGTAAGATAAATTAATTAAAGAAAATTTAGAATTCGAGCTCGTTTAAAC	0		0		0
YBR085W	AAC3,ANC3	2	401246	402169	+	AATTGAAGACGGTTTACCTGAAGTGATATACTGTGCCTTGAGAAACAATG	TTTCCATGTATGACCAGTTGCAAATGATATTGTTCGGTAAAAAATTCAAA	AAGGTGAAGAGAAGTCGATAAAATGACTTTTTTCTTCATCCAACTGATCA	AATTGAAGACGGTTTACCTGAAGTGATATACTGTGCCTTGAGAAACAATGCGGATCCCCGGGTTAATTAA	TTTCCATGTATGACCAGTTGCAAATGATATTGTTCGGTAAAAAATTCAAACGGATCCCCGGGTTAATTAA	AAGGTGAAGAGAAGTCGATAAAATGACTTTTTTCTTCATCCAACTGATCAGAATTCGAGCTCGTTTAAAC	0		0		0
YBR085C-A	YBR085C-A	2	404166	404423	-	ATAGGGGTTCAAGTCACCAACTACAATAAATTACATTATACTATAACATG	ATATCATTGGTGAGGCCAAAGATTATCTTTTGGATTTGGCCGGCCAGGCT	AAGTGTGCATGAAGTGACTCGTATCGAACAAATATTTAGCCACTCGTTCA	ATAGGGGTTCAAGTCACCAACTACAATAAATTACATTATACTATAACATGCGGATCCCCGGGTTAATTAA	ATATCATTGGTGAGGCCAAAGATTATCTTTTGGATTTGGCCGGCCAGGCTCGGATCCCCGGGTTAATTAA	AAGTGTGCATGAAGTGACTCGTATCGAACAAATATTTAGCCACTCGTTCAGAATTCGAGCTCGTTTAAAC	0		0		0
YBR086C	IST2	2	405459	408311	-	AATACATTTGAAAAAGATTAAAACAAGCACAAGCAGTTGAGCATACTATG	AAAAACCAAAACATAAAAAGGGGCTATTGCATAAGCTGAAAAAGAAGCTT	ATGTCACCATATTATAAAAATAAAATTTGTTATCGTCCTAGCTTTTTTTA	AATACATTTGAAAAAGATTAAAACAAGCACAAGCAGTTGAGCATACTATGCGGATCCCCGGGTTAATTAA	AAAAACCAAAACATAAAAAGGGGCTATTGCATAAGCTGAAAAAGAAGCTTCGGATCCCCGGGTTAATTAA	ATGTCACCATATTATAAAAATAAAATTTGTTATCGTCCTAGCTTTTTTTAGAATTCGAGCTCGTTTAAAC	0		0		0
YBR087W	RFC5	2	409038	410102	+	CATTTGTATGATGGTTCATGGAAATTATAGATTAGTACAGCACAAACATG	CAATATTCCATTTGGAAGGGTTCATAGCAAAAGTCATGTGCTGTCTAGAT	TATCAGCTTTTTGTGTGACTTATACAGTATTTATGACATATCTTACATTA	CATTTGTATGATGGTTCATGGAAATTATAGATTAGTACAGCACAAACATGCGGATCCCCGGGTTAATTAA	CAATATTCCATTTGGAAGGGTTCATAGCAAAAGTCATGTGCTGTCTAGATCGGATCCCCGGGTTAATTAA	TATCAGCTTTTTGTGTGACTTATACAGTATTTATGACATATCTTACATTAGAATTCGAGCTCGTTTAAAC	0		0		0
YBR088C	POL30	2	410262	411038	-	CAGCAACAAGCAGCAAGCACTAAGTACGCAGTCAAAAGAGAGAGAAAATG	AGAGTGGGTTCCTACAGTTTTTCTTGGCTCCTAAATTTAATGACGAAGAA	TTTTTTGTTTATTATTTTTAGTATACAACTATATAGATAATTTACATTTA	CAGCAACAAGCAGCAAGCACTAAGTACGCAGTCAAAAGAGAGAGAAAATGCGGATCCCCGGGTTAATTAA	AGAGTGGGTTCCTACAGTTTTTCTTGGCTCCTAAATTTAATGACGAAGAACGGATCCCCGGGTTAATTAA	TTTTTTGTTTATTATTTTTAGTATACAACTATATAGATAATTTACATTTAGAATTCGAGCTCGTTTAAAC	1	YBR089W	1	YBR089W	0
YBR089W	YBR089W	2	410455	411054	+	ATTTAGCTCCGAACGTCAAGTCGACAGGTTGATCCATTTCAAGTTTGATG	TGAAAAGGGATGCTTCTTCAAATTTTGCTTCTAACATTTTCTCTCTCTTT	CGTCCTTTTTCACTCACAGCAACAAGCAGCAAGCACTAAGTACGCAGTCA	ATTTAGCTCCGAACGTCAAGTCGACAGGTTGATCCATTTCAAGTTTGATGCGGATCCCCGGGTTAATTAA	TGAAAAGGGATGCTTCTTCAAATTTTGCTTCTAACATTTTCTCTCTCTTTCGGATCCCCGGGTTAATTAA	CGTCCTTTTTCACTCACAGCAACAAGCAGCAAGCACTAAGTACGCAGTCAGAATTCGAGCTCGTTTAAAC	1	YBR088C	1	YBR088C	0
YBR089C-A	NHP6B,YBR090C-A	2	411461	411760	-	GTACTAACTAATTAACTTAGAACATTAACATATATAAAACTAGCGCTATG	ACAAGAAGAGATACGAATCTGAAAAGGAATTGTACAATGCTACACGTGCT	TTTCAAAAGTACGTTGTATGGGGGGTAGAGAACATTGAGTTGTTAGATTA	GTACTAACTAATTAACTTAGAACATTAACATATATAAAACTAGCGCTATGCGGATCCCCGGGTTAATTAA	ACAAGAAGAGATACGAATCTGAAAAGGAATTGTACAATGCTACACGTGCTCGGATCCCCGGGTTAATTAA	TTTCAAAAGTACGTTGTATGGGGGGTAGAGAACATTGAGTTGTTAGATTAGAATTCGAGCTCGTTTAAAC	1	YBR090C	1	YBR090C	0
YBR090C	YBR090C	2	411604	412329	-	TGCATATATAGCATAAGCTGTGTAGACAATTTTAGAAGTACATTTATATG	GTTCTTTGCTAATGAAAACAGAGATATTGTCCGTTCCGAGAATCCTGACG	TAAGGCCTTCCACTTCTCACCCAATATTCTGCCTACTTGGCCAAAAGTTA	TGCATATATAGCATAAGCTGTGTAGACAATTTTAGAAGTACATTTATATGCGGATCCCCGGGTTAATTAA	GTTCTTTGCTAATGAAAACAGAGATATTGTCCGTTCCGAGAATCCTGACGCGGATCCCCGGGTTAATTAA	TAAGGCCTTCCACTTCTCACCCAATATTCTGCCTACTTGGCCAAAAGTTAGAATTCGAGCTCGTTTAAAC	1	YBR089C-A	1	YBR089C-A	0
YBR091C	MRS5,TIM12	2	412423	412752	-	ATAGATATCGGAGCTCCCGTATAATATTAAAGTGCACCAAGAAAAGGATG	GACATTATTCGCGATTTGTGGCCAAAGAAATAGCTGATGATTCCAAAAAA	AGGTTACTATTATATACAAACAGCACAGACAGTCCTCATATTTACAGCTA	ATAGATATCGGAGCTCCCGTATAATATTAAAGTGCACCAAGAAAAGGATGCGGATCCCCGGGTTAATTAA	GACATTATTCGCGATTTGTGGCCAAAGAAATAGCTGATGATTCCAAAAAACGGATCCCCGGGTTAATTAA	AGGTTACTATTATATACAAACAGCACAGACAGTCCTCATATTTACAGCTAGAATTCGAGCTCGTTTAAAC	0		0		0
YBR092C	PHO3	2	412966	414369	-	TCATAAAAAAAATACTATAGTAAAGAAAGGGCCATTCCAAATTACCTATG	TCTACTGGGACTGGAATACTACTCACTACAACGATACCCTATTAAAACAA	ATCGATGGGTATTTATTTATATTTGCAATATTATTTATTTATACAATTTA	TCATAAAAAAAATACTATAGTAAAGAAAGGGCCATTCCAAATTACCTATGCGGATCCCCGGGTTAATTAA	TCTACTGGGACTGGAATACTACTCACTACAACGATACCCTATTAAAACAACGGATCCCCGGGTTAATTAA	ATCGATGGGTATTTATTTATATTTGCAATATTATTTATTTATACAATTTAGAATTCGAGCTCGTTTAAAC	0		0		0
YBR093C	PHO5	2	414817	416220	-	GAGAATAAGAACAACAACAAATAGAGCAAGCAAATTCGAGATTACCAATG	TCTACTGGGACTGGAACACTACTCATTACAACGCCAGTCTATTGATACAA	ATTTGGGTATTCGTATTTAGTTTCCAATATTATTTAGTTATACAAAACTA	GAGAATAAGAACAACAACAAATAGAGCAAGCAAATTCGAGATTACCAATGCGGATCCCCGGGTTAATTAA	TCTACTGGGACTGGAACACTACTCATTACAACGCCAGTCTATTGATACAACGGATCCCCGGGTTAATTAA	ATTTGGGTATTCGTATTTAGTTTCCAATATTATTTAGTTATACAAAACTAGAATTCGAGCTCGTTTAAAC	0		0		0
YBR094W	PBY1	2	417305	419566	+	TGATCTCTGACATTAAAAATTCGGAAACAATAATTACTTCTTTTAAGATG	AAACAGACCCGAACTTCGTAAAAGTCATTGATTACACTTCAAACGGTTGG	TTAGTAATAATAACAGTATTTTAGGATGGGTTCTTTTTTTTTTTGTTTCA	TGATCTCTGACATTAAAAATTCGGAAACAATAATTACTTCTTTTAAGATGCGGATCCCCGGGTTAATTAA	AAACAGACCCGAACTTCGTAAAAGTCATTGATTACACTTCAAACGGTTGGCGGATCCCCGGGTTAATTAA	TTAGTAATAATAACAGTATTTTAGGATGGGTTCTTTTTTTTTTTGTTTCAGAATTCGAGCTCGTTTAAAC	0		0		0
YBR095C	RXT2,RAF60	2	419673	420965	-	AGAGGTTGAGAAACAAATATCTCAGCTGTTGCTTCTTGTTGATCGAGATG	AAGACGGTGTTGTAGACGATAATGAACCAGATGAAGAAGCTAATAGAGCC	AATACATATGCCTTGATTTTATTTCCGAAATTTTTTGTTTTGTCAATTTA	AGAGGTTGAGAAACAAATATCTCAGCTGTTGCTTCTTGTTGATCGAGATGCGGATCCCCGGGTTAATTAA	AAGACGGTGTTGTAGACGATAATGAACCAGATGAAGAAGCTAATAGAGCCCGGATCCCCGGGTTAATTAA	AATACATATGCCTTGATTTTATTTCCGAAATTTTTTGTTTTGTCAATTTAGAATTCGAGCTCGTTTAAAC	0		0		0
YBR096W	YBR096W	2	421288	421980	+	GTAACTAGTGCTTTCCAATATCTACAACAAAATAAAATAATAGAATAATG	ACGAGACAGTACCATTGGAAAACTTGAGCCAAGAGTACTGTTCAGAAATC	AAGATAGATTTATATATTTTATAATACCGGCTATATGTGTATAGAAGTTA	GTAACTAGTGCTTTCCAATATCTACAACAAAATAAAATAATAGAATAATGCGGATCCCCGGGTTAATTAA	ACGAGACAGTACCATTGGAAAACTTGAGCCAAGAGTACTGTTCAGAAATCCGGATCCCCGGGTTAATTAA	AAGATAGATTTATATATTTTATAATACCGGCTATATGTGTATAGAAGTTAGAATTCGAGCTCGTTTAAAC	0		0		0
YBR097W	VPS15,VPL19,VAC4,GRD8	2	422217	426581	+	GGAATACAAAAGCTGTAAGGTTATCAAAAAGGAAGGCATACAGTATAATG	CACCTTTGCTGGTTGCTTGTGATAACTCAGGGCTTATTGGAATCTTCCAA	AAATTTATACGCATTTAGAATAAAGAAGCTGAATAAAATAAAAAAAATTA	GGAATACAAAAGCTGTAAGGTTATCAAAAAGGAAGGCATACAGTATAATGCGGATCCCCGGGTTAATTAA	CACCTTTGCTGGTTGCTTGTGATAACTCAGGGCTTATTGGAATCTTCCAACGGATCCCCGGGTTAATTAA	AAATTTATACGCATTTAGAATAAAGAAGCTGAATAAAATAAAAAAAATTAGAATTCGAGCTCGTTTAAAC	0		0		0
YBR098W	MMS4,YBR100W,SLX2	2	426781	428856	+	TGGATTATGGTATAGAATAATAGTAGTCACATATTGCAGCTAGTTAAATG	AAAGATTGTACAAACTGTTTACTTGTACTGATCCAAATGATACTATTGAA	ACGACTGCCTTAAGGTATGTTCTTATATACAAAGTTTCGTTCGATCATCA	TGGATTATGGTATAGAATAATAGTAGTCACATATTGCAGCTAGTTAAATGCGGATCCCCGGGTTAATTAA	AAAGATTGTACAAACTGTTTACTTGTACTGATCCAAATGATACTATTGAACGGATCCCCGGGTTAATTAA	ACGACTGCCTTAAGGTATGTTCTTATATACAAAGTTTCGTTCGATCATCAGAATTCGAGCTCGTTTAAAC	1	YBR099C	1	YBR099C	0
YBR099C	YBR099C	2	428190	428573	-	ATTTTACATTCAAATGAGCATATTTCATATACCGAATTGCGGGATCCATG	ATAATTCTTTCTTTTGTGAAGTGTATTGTTCAAAAAATTCTTGCGCATCA	TATCCCTGTGATCCCAAAATAGTTGAAGAAAACGTTTTGATTCTATATTA	ATTTTACATTCAAATGAGCATATTTCATATACCGAATTGCGGGATCCATGCGGATCCCCGGGTTAATTAA	ATAATTCTTTCTTTTGTGAAGTGTATTGTTCAAAAAATTCTTGCGCATCACGGATCCCCGGGTTAATTAA	TATCCCTGTGATCCCAAAATAGTTGAAGAAAACGTTTTGATTCTATATTAGAATTCGAGCTCGTTTAAAC	1	YBR098W	1	YBR098W	0
YBR101C	FES1	2	429087	429959	-	TACCTTTCAACGAAAGAGTAAAATAGAAAAAAAACACATACATAACTATG	TAAAGGACAGACTTAATGAAGACGATTATTTAGCCGTAAAGTATGTATTA	TAATATGAAATGGTGAATGTAATATCATTTTATTTCTACGGACGTAATCA	TACCTTTCAACGAAAGAGTAAAATAGAAAAAAAACACATACATAACTATGCGGATCCCCGGGTTAATTAA	TAAAGGACAGACTTAATGAAGACGATTATTTAGCCGTAAAGTATGTATTACGGATCCCCGGGTTAATTAA	TAATATGAAATGGTGAATGTAATATCATTTTATTTCTACGGACGTAATCAGAATTCGAGCTCGTTTAAAC	0		0		0
YBR102C	EXO84,USA3	2	430327	432588	-	ATTAGACCAGGTAAGAGACTGAAAGTTGAAATATTTGTACTGTGAAAATG	TTGTCTACAAATTGGACGAGTTTATCAAAAAGAACAGTGATAAAATTCGC	CTACACATCATATATATTGAAGTGAGGTTTATTTTCTGTGATCTTGTTTA	ATTAGACCAGGTAAGAGACTGAAAGTTGAAATATTTGTACTGTGAAAATGCGGATCCCCGGGTTAATTAA	TTGTCTACAAATTGGACGAGTTTATCAAAAAGAACAGTGATAAAATTCGCCGGATCCCCGGGTTAATTAA	CTACACATCATATATATTGAAGTGAGGTTTATTTTCTGTGATCTTGTTTAGAATTCGAGCTCGTTTAAAC	0		0		0
YBR103W	SIF2,EMB1	2	432974	434581	+	AAATAACAGAAACAAAAAAAAGGTAGGGAAGGCCCATCACACGGAAAATG	ACAAGATTTCTGTAGCATACTCGCTTCAAGAAGGTTCAGTTGTAGCCATA	ACAATAAGAATGATAAAATTCATCTGTTTATGTACTGTACCTAGTTATTA	AAATAACAGAAACAAAAAAAAGGTAGGGAAGGCCCATCACACGGAAAATGCGGATCCCCGGGTTAATTAA	ACAAGATTTCTGTAGCATACTCGCTTCAAGAAGGTTCAGTTGTAGCCATACGGATCCCCGGGTTAATTAA	ACAATAAGAATGATAAAATTCATCTGTTTATGTACTGTACCTAGTTATTAGAATTCGAGCTCGTTTAAAC	0		0		0
YBR103C-A	YBR103C-A	2	434585	434728	-	ATGCTCATTGTCTTCTCTCATCGCGAGCGGCCGTTATCTTCAAAGTGATG	AAAGAAATAACAATAAGAATGATAAAATTCATCTGTTTATGTACTGTACC	CTGTAGCATACTCGCTTCAAGAAGGTTCAGTTGTAGCCATATAATAACTA	ATGCTCATTGTCTTCTCTCATCGCGAGCGGCCGTTATCTTCAAAGTGATGCGGATCCCCGGGTTAATTAA	AAAGAAATAACAATAAGAATGATAAAATTCATCTGTTTATGTACTGTACCCGGATCCCCGGGTTAATTAA	CTGTAGCATACTCGCTTCAAGAAGGTTCAGTTGTAGCCATATAATAACTAGAATTCGAGCTCGTTTAAAC	0		0		0
YBR104W	YMC2	2	434932	435921	+	AGAAAAAAGCGGCGCAATAATTTCGTGTATTACAATTACAGTTAGTCATG	GTGCGACATTCCTGACGTTTGAATTAGTCATGAGATTTCTGGGGGAAGAG	CATGTCTATGTCTATATCTATAAAACGATGTTTTCATATATACTCTCCTA	AGAAAAAAGCGGCGCAATAATTTCGTGTATTACAATTACAGTTAGTCATGCGGATCCCCGGGTTAATTAA	GTGCGACATTCCTGACGTTTGAATTAGTCATGAGATTTCTGGGGGAAGAGCGGATCCCCGGGTTAATTAA	CATGTCTATGTCTATATCTATAAAACGATGTTTTCATATATACTCTCCTAGAATTCGAGCTCGTTTAAAC	0		0		0
YBR105C	VID24,GID4	2	436145	437233	-	TTGTGGCGTCTTGTGCATGACACCAACACATATCACAAGCTTGAGTCATG	CATCTTTGAAAAATAAAGTCGAGTCCAGTGATTGTTCTTTTGAGTTTGCT	TTAGTGAAGAGAAAAGGGTATGCAGGTAAAAACGAATATATCACACATCA	TTGTGGCGTCTTGTGCATGACACCAACACATATCACAAGCTTGAGTCATGCGGATCCCCGGGTTAATTAA	CATCTTTGAAAAATAAAGTCGAGTCCAGTGATTGTTCTTTTGAGTTTGCTCGGATCCCCGGGTTAATTAA	TTAGTGAAGAGAAAAGGGTATGCAGGTAAAAACGAATATATCACACATCAGAATTCGAGCTCGTTTAAAC	0		0		0
YBR106W	PHO88	2	437926	438492	+	GAAACTATAACAGTATAACACAGCACAAGAGAACCGAGCAGCCCGCCATG	AATCTATCGAAGAAGCTGAAAGAGCCGGTAACGCTGGTGTTAAGGCTGAA	TTTTACATAAAAACTAGGAAAAAAAAAATACTTCGCTTTTGATCGAATCA	GAAACTATAACAGTATAACACAGCACAAGAGAACCGAGCAGCCCGCCATGCGGATCCCCGGGTTAATTAA	AATCTATCGAAGAAGCTGAAAGAGCCGGTAACGCTGGTGTTAAGGCTGAACGGATCCCCGGGTTAATTAA	TTTTACATAAAAACTAGGAAAAAAAAAATACTTCGCTTTTGATCGAATCAGAATTCGAGCTCGTTTAAAC	0		0		0
YBR107C	IML3,MCM19	2	439061	439798	-	GGTTGATTTGACTGTCTATAGGTATCAACGTACTTCCTTTGGATGGAATG	GGAACAGAGTTCTAGCAGTTGTACTCCAATCGATTCAGTTTACCAGCGAG	TAGAGCTGTGGTTTTTTATTGTATCTTGGTGAATATTCTTTATAGTGTTA	GGTTGATTTGACTGTCTATAGGTATCAACGTACTTCCTTTGGATGGAATGCGGATCCCCGGGTTAATTAA	GGAACAGAGTTCTAGCAGTTGTACTCCAATCGATTCAGTTTACCAGCGAGCGGATCCCCGGGTTAATTAA	TAGAGCTGTGGTTTTTTATTGTATCTTGGTGAATATTCTTTATAGTGTTAGAATTCGAGCTCGTTTAAAC	0		0		0
YBR108W	YBR108W	2	440090	442918	+	TATGTTCGAGAGAGGTCTTTCATAAAAAAATCAAGTTATCAACCAGCATG	ACAAACGAAATGTTGTTCCTCAAGAAGATGACAGACTGCATAAATTAAAA	TAACTAAATTTAGCCAGTATTAAGTTCAATGTTGCGTAGCTATTTCATTA	TATGTTCGAGAGAGGTCTTTCATAAAAAAATCAAGTTATCAACCAGCATGCGGATCCCCGGGTTAATTAA	ACAAACGAAATGTTGTTCCTCAAGAAGATGACAGACTGCATAAATTAAAACGGATCCCCGGGTTAATTAA	TAACTAAATTTAGCCAGTATTAAGTTCAATGTTGCGTAGCTATTTCATTAGAATTCGAGCTCGTTTAAAC	0		0		0
YBR109C	CMD1,CaM	2	443172	443615	-	ATCGAACTACAAAGAAAGAGCTTAGTTAATACAAATAAAAAAGTACAATG	ATGGATCAGGCGAGATCAACATTCAACAATTCGCTGCTTTGTTATCTAAA	GAATGGTAAGGGTAAGATAGCGGGAGCAAAAAATCACAAGGATGCACCTA	ATCGAACTACAAAGAAAGAGCTTAGTTAATACAAATAAAAAAGTACAATGCGGATCCCCGGGTTAATTAA	ATGGATCAGGCGAGATCAACATTCAACAATTCGCTGCTTTGTTATCTAAACGGATCCCCGGGTTAATTAA	GAATGGTAAGGGTAAGATAGCGGGAGCAAAAAATCACAAGGATGCACCTAGAATTCGAGCTCGTTTAAAC	0		0		0
YBR109W-A	YBR109W-A	2	443861	444085	+	TGTCTCAAATTGGGTGGAAAAGAGGGTGCTTGAATTCATTAGGACATATG	TTAATTGGTCATATATCTTTTAATCAGCAATTACCAAAGCCATTAGAAGG	AAAAACATTTTCACCAATTGACTATAGCCCCTAAAATGCCGTTAAAATTA	TGTCTCAAATTGGGTGGAAAAGAGGGTGCTTGAATTCATTAGGACATATGCGGATCCCCGGGTTAATTAA	TTAATTGGTCATATATCTTTTAATCAGCAATTACCAAAGCCATTAGAAGGCGGATCCCCGGGTTAATTAA	AAAAACATTTTCACCAATTGACTATAGCCCCTAAAATGCCGTTAAAATTAGAATTCGAGCTCGTTTAAAC	0		0		0
YBR110W	ALG1	2	444125	445474	+	GAAGGTAATTTTAACGGCATTTTAGGGGCTATAGTCAATTGGTGAAAATG	GATGGCAATCAAATTGGGAACGAACAATGAGAGATTTGAAGCTAATTCAT	ACCAACAAATATTAATTTTCAAAAAGAAAGGCTGAGTTACCATTGACTCA	GAAGGTAATTTTAACGGCATTTTAGGGGCTATAGTCAATTGGTGAAAATGCGGATCCCCGGGTTAATTAA	GATGGCAATCAAATTGGGAACGAACAATGAGAGATTTGAAGCTAATTCATCGGATCCCCGGGTTAATTAA	ACCAACAAATATTAATTTTCAAAAAGAAAGGCTGAGTTACCATTGACTCAGAATTCGAGCTCGTTTAAAC	0		0		0
YBR111C	YSA1,RMA2	2	446446	447141	-	GCTTTTATGATTATTCTTTCGGCATTTTCCTTCGTTCTCATACTTAGATG	TTCAAAACGTAGCTCAAGGTATCCTCATGGCCAAGCAATACCACATCAAA	ATTAACATCTCGCCTATTTTTCATACAGAAACACTACTTATCGCTATCTA	GCTTTTATGATTATTCTTTCGGCATTTTCCTTCGTTCTCATACTTAGATGCGGATCCCCGGGTTAATTAA	TTCAAAACGTAGCTCAAGGTATCCTCATGGCCAAGCAATACCACATCAAACGGATCCCCGGGTTAATTAA	ATTAACATCTCGCCTATTTTTCATACAGAAACACTACTTATCGCTATCTAGAATTCGAGCTCGTTTAAAC	0		0		0
YBR111W-A	SUS1	2	447407	447849	+	CAACACATGCGACAAAATCAGAAGTAACAATTCTGGCCTTCACTCCAATG	CCGTTTTAAAGCAAATAAGGGAATTTCTTAAAGAGATTGTAGATACACAA	TGAGCATATGTAATAATATTGGGAATTAAGGTGCATTTTTGTATCCTTCA	CAACACATGCGACAAAATCAGAAGTAACAATTCTGGCCTTCACTCCAATGCGGATCCCCGGGTTAATTAA	CCGTTTTAAAGCAAATAAGGGAATTTCTTAAAGAGATTGTAGATACACAACGGATCCCCGGGTTAATTAA	TGAGCATATGTAATAATATTGGGAATTAAGGTGCATTTTTGTATCCTTCAGAATTCGAGCTCGTTTAAAC	0		0		0
YBR112C	CYC8,SSN6,CRT8	2	448140	451589	-	GCAACAACAACAAACAAAACAGAACTGGAAAAAAAAAATTAGGAAAAATG	CAAGAGAAAATGTAGTAAGGCAAGTGGAAGAAGATGAAAACTACGACGAC	TCTCGTTGATTATAAATTAGTAGATTAATTTTTTGAATGCAAACTTTTTA	GCAACAACAACAAACAAAACAGAACTGGAAAAAAAAAATTAGGAAAAATGCGGATCCCCGGGTTAATTAA	CAAGAGAAAATGTAGTAAGGCAAGTGGAAGAAGATGAAAACTACGACGACCGGATCCCCGGGTTAATTAA	TCTCGTTGATTATAAATTAGTAGATTAATTTTTTGAATGCAAACTTTTTAGAATTCGAGCTCGTTTAAAC	1	YBR113W	1	YBR113W	0
YBR113W	YBR113W	2	451373	451867	+	TGTTAAAGCCTTTGCAGATGAGGGATTGAACTGTAAAGTGGCGTCATATG	GAACAGGAAACAAAAAACAAAAAGACAAAGAAAAAAATGCGCTTTTGCTT	TTTTATTTTTCTTTTCTTCGGTCGGTCGTTCTTTTCCCTTCCGATTATCA	TGTTAAAGCCTTTGCAGATGAGGGATTGAACTGTAAAGTGGCGTCATATGCGGATCCCCGGGTTAATTAA	GAACAGGAAACAAAAAACAAAAAGACAAAGAAAAAAATGCGCTTTTGCTTCGGATCCCCGGGTTAATTAA	TTTTATTTTTCTTTTCTTCGGTCGGTCGTTCTTTTCCCTTCCGATTATCAGAATTCGAGCTCGTTTAAAC	1	YBR112C	1	YBR112C	0
YBR114W	RAD16,PSO5	2	453064	455436	+	ATTTTAGATACTCTTGGCCGTATAACTGGTGTACCAACTGAAAAATCATG	CTGCCATTAGCAGACTAACGCCAGCTGATTTACAGTTCTTATTCAATAAC	TGTCACTTAAAAACTCCGAGAATAATATATAATAAGAGAATAAAATATTA	ATTTTAGATACTCTTGGCCGTATAACTGGTGTACCAACTGAAAAATCATGCGGATCCCCGGGTTAATTAA	CTGCCATTAGCAGACTAACGCCAGCTGATTTACAGTTCTTATTCAATAACCGGATCCCCGGGTTAATTAA	TGTCACTTAAAAACTCCGAGAATAATATATAATAAGAGAATAAAATATTAGAATTCGAGCTCGTTTAAAC	0		0		0
YBR115C	LYS2	2	455564	459742	-	AGTGAAAAACTGCTAATTATAGAGAGATATCACAGAGTTACTCACTAATG	TAAGTCTAGTTGCTTCAGGTGCTGGTGCTCGTGGAAGCTCCGCAGCAGCT	TCATATTTAATTATTGTACATGGACATATTATACGTAATGCTCAACCTTA	AGTGAAAAACTGCTAATTATAGAGAGATATCACAGAGTTACTCACTAATGCGGATCCCCGGGTTAATTAA	TAAGTCTAGTTGCTTCAGGTGCTGGTGCTCGTGGAAGCTCCGCAGCAGCTCGGATCCCCGGGTTAATTAA	TCATATTTAATTATTGTACATGGACATATTATACGTAATGCTCAACCTTAGAATTCGAGCTCGTTTAAAC	0		0		0
YBR116C	YBR116C	2	460015	460542	-	TGATATTATCCTGGTGTCAACAGGATCAGAAGTCTCCATTTCTATAGATG	ATTATTCGATTTTCTTCTTGCTGACCGCTTCTAGAGGCATCGCACAGTTT	ATTGCAAGTGGAATTCCGCTGGCAAAACTATTGAAGAGTTTTCCTCGCTA	TGATATTATCCTGGTGTCAACAGGATCAGAAGTCTCCATTTCTATAGATGCGGATCCCCGGGTTAATTAA	ATTATTCGATTTTCTTCTTGCTGACCGCTTCTAGAGGCATCGCACAGTTTCGGATCCCCGGGTTAATTAA	ATTGCAAGTGGAATTCCGCTGGCAAAACTATTGAAGAGTTTTCCTCGCTAGAATTCGAGCTCGTTTAAAC	1	YBR117C	1	YBR117C	0
YBR117C	TKL2	2	460208	462253	-	TCTACGTAGACGATTATACCTTACTAATCAAAAAAGAACAAAAAAAAATG	TCAATTACTACAAAGGAAAGCAGTTGCTTTCTCCTATGGGAATAGCTTTC	TCAACCAGGAAGTATGAAATAGCAAAGAACTGTTTACTTCTTCAGACTTA	TCTACGTAGACGATTATACCTTACTAATCAAAAAAGAACAAAAAAAAATGCGGATCCCCGGGTTAATTAA	TCAATTACTACAAAGGAAAGCAGTTGCTTTCTCCTATGGGAATAGCTTTCCGGATCCCCGGGTTAATTAA	TCAACCAGGAAGTATGAAATAGCAAAGAACTGTTTACTTCTTCAGACTTAGAATTCGAGCTCGTTTAAAC	1	YBR116C	1	YBR116C	0
YBR118W	TEF2,EF-1%20alpha	2	463479	464855	+	GTACTTGTTTTTAGAATATACGGTCAACGAACTATAATTAACTAAACATG	CTGAAAAGGCCGCTAAGGTTACCAAGGCTGCTCAAAAGGCTGCTAAGAAA	AATAAGAGGTATATAAAAATATTATATGGAAGCAATAATTATTACTCTTA	GTACTTGTTTTTAGAATATACGGTCAACGAACTATAATTAACTAAACATGCGGATCCCCGGGTTAATTAA	CTGAAAAGGCCGCTAAGGTTACCAAGGCTGCTCAAAAGGCTGCTAAGAAACGGATCCCCGGGTTAATTAA	AATAAGAGGTATATAAAAATATTATATGGAAGCAATAATTATTACTCTTAGAATTCGAGCTCGTTTAAAC	0		0		0
YBR119W	MUD1	2	465146	466131	+	AAAAGCTGCTATCAACAAAAGACGGCCTCATCAAACCTAAAGAAACCATG	GCTCCACTTACAAGCTACAAAACAATGACGTTACCATAGGATTTGCTAAG	TTATCTGTGAATTTCTTTACTCGAGGTATACTTCCGCAAAGGAAATTCTA	AAAAGCTGCTATCAACAAAAGACGGCCTCATCAAACCTAAAGAAACCATGCGGATCCCCGGGTTAATTAA	GCTCCACTTACAAGCTACAAAACAATGACGTTACCATAGGATTTGCTAAGCGGATCCCCGGGTTAATTAA	TTATCTGTGAATTTCTTTACTCGAGGTATACTTCCGCAAAGGAAATTCTAGAATTCGAGCTCGTTTAAAC	0		0		0
YBR120C	CBP6	2	466243	466731	-	TATCAGCTTACCAAGTTAAACTCCGTATTCCACAAGCAAGTGCCAAAATG	AGAAAAAGGAAAGCTTATTTACTGCAATGAGAACTGTATTATTTGGTAAA	CATTATGAATAAATATGTATTTACAAGCTTAGAAAATAATGTGCTCTTTA	TATCAGCTTACCAAGTTAAACTCCGTATTCCACAAGCAAGTGCCAAAATGCGGATCCCCGGGTTAATTAA	AGAAAAAGGAAAGCTTATTTACTGCAATGAGAACTGTATTATTTGGTAAACGGATCCCCGGGTTAATTAA	CATTATGAATAAATATGTATTTACAAGCTTAGAAAATAATGTGCTCTTTAGAATTCGAGCTCGTTTAAAC	0		0		0
YBR121C	GRS1	2	467172	469175	-	GACGATTTTACTCTCAGATTGTTAAAAAATCGGTTAAGATTAAAAGAATG	AGGATTTGACTCCTTTTATTGCCCAAGCTGAAGCTGAAGCTGAAACTGAC	TTTAATTTACATGTTTGGCGATATATAGTTAAAATTAAGTCATTTATTTA	GACGATTTTACTCTCAGATTGTTAAAAAATCGGTTAAGATTAAAAGAATGCGGATCCCCGGGTTAATTAA	AGGATTTGACTCCTTTTATTGCCCAAGCTGAAGCTGAAGCTGAAACTGACCGGATCCCCGGGTTAATTAA	TTTAATTTACATGTTTGGCGATATATAGTTAAAATTAAGTCATTTATTTAGAATTCGAGCTCGTTTAAAC	1	YBR121C-A	1	YBR121C-A	0
YBR121C-A	YBR121C-A	2	468134	468292	-	GATTGAACATTTCGTTGACCCATTGGACAAATCTCATCCAAAATTTAATG	GGTCGATAATGAAACTTTGGGTTACTTTATTGCCAGAATTTACCAATTTT	CATATGTTGACGGAATCTCAATTTGGACTCATCAACACCAATTTTCATCA	GATTGAACATTTCGTTGACCCATTGGACAAATCTCATCCAAAATTTAATGCGGATCCCCGGGTTAATTAA	GGTCGATAATGAAACTTTGGGTTACTTTATTGCCAGAATTTACCAATTTTCGGATCCCCGGGTTAATTAA	CATATGTTGACGGAATCTCAATTTGGACTCATCAACACCAATTTTCATCAGAATTCGAGCTCGTTTAAAC	1	YBR121C	1	YBR121C	0
YBR122C	MRPL36	2	469778	470311	-	AAAGAACGGGTACCAACGCAAACGAACACACGTTTTGTTCACTCCTAATG	AACAACAGATCAAATCAGGTAAGTTGGCCAGTAAGAAGAGAGACAAGAAG	AATATAAATTGGTTCGGGAATGGAAAAGTAAGGGGAGCAAACACTATTCA	AAAGAACGGGTACCAACGCAAACGAACACACGTTTTGTTCACTCCTAATGCGGATCCCCGGGTTAATTAA	AACAACAGATCAAATCAGGTAAGTTGGCCAGTAAGAAGAGAGACAAGAAGCGGATCCCCGGGTTAATTAA	AATATAAATTGGTTCGGGAATGGAAAAGTAAGGGGAGCAAACACTATTCAGAATTCGAGCTCGTTTAAAC	0		0		0
YBR123C	TFC1	2	470550	472499	-	TAATCTCTATAGCTTTCAAGAGCGAAAATATCTTCCAAATCGTGAAAATG	CGGAAACAATGAAAAGCGAGCTCAAGGGATTTGTTGATGAAGTCGATCTG	TGCACATTTGGCATATTTTGATATTGAAATAAAAGAAAACCTACTTATTA	TAATCTCTATAGCTTTCAAGAGCGAAAATATCTTCCAAATCGTGAAAATGCGGATCCCCGGGTTAATTAA	CGGAAACAATGAAAAGCGAGCTCAAGGGATTTGTTGATGAAGTCGATCTGCGGATCCCCGGGTTAATTAA	TGCACATTTGGCATATTTTGATATTGAAATAAAAGAAAACCTACTTATTAGAATTCGAGCTCGTTTAAAC	1	YBR124W	1	YBR124W	0
YBR124W	YBR124W	2	472315	472674	+	GAGATTCGATAGGTCCATGTTCTTTAAAGGCTTCTTTCACTTTTTCGATG	TTTTCAGAAAGACCAAAAGCGAAGAAGCGAAGAAGAGGACTTCTCTGTAC	ATAAATTCACATATTCATGTTTAGTTTTCCTTTTATATAATTTGGTCTTA	GAGATTCGATAGGTCCATGTTCTTTAAAGGCTTCTTTCACTTTTTCGATGCGGATCCCCGGGTTAATTAA	TTTTCAGAAAGACCAAAAGCGAAGAAGCGAAGAAGAGGACTTCTCTGTACCGGATCCCCGGGTTAATTAA	ATAAATTCACATATTCATGTTTAGTTTTCCTTTTATATAATTTGGTCTTAGAATTCGAGCTCGTTTAAAC	1	YBR123C	1	YBR123C	0
YBR125C	PTC4,GCT1	2	473020	474201	-	CCTATATAGCCATTTTAGAAAGTAACTTCAATTTGAAGAAGACAAAAATG	ACTGGTTTAATAAAATGAAGACCCGTTTGGAAAGAGAAAGGGGCCTAGTG	TTCAGATATGTATGAGAAAAAGGAAGAAGAATAATAATTTTTTTTCCTTA	CCTATATAGCCATTTTAGAAAGTAACTTCAATTTGAAGAAGACAAAAATGCGGATCCCCGGGTTAATTAA	ACTGGTTTAATAAAATGAAGACCCGTTTGGAAAGAGAAAGGGGCCTAGTGCGGATCCCCGGGTTAATTAA	TTCAGATATGTATGAGAAAAAGGAAGAAGAATAATAATTTTTTTTCCTTAGAATTCGAGCTCGTTTAAAC	0		0		0
YBR126C	TPS1,TSS1,GLC6,GGS1,FDP1,CIF1,BYP1	2	474726	476213	-	GCTAACAAACTAGGTACTCACATACAGACTTATTAAGACATAGAACTATG	AATTATACAGTACATCATCAAGCTCAACAAGCTCCTCTGCCACCAAAAAC	GAAAACCGGACCAGGAATAGACGATCGTCTCATTTGCATCGAGTTCATCA	GCTAACAAACTAGGTACTCACATACAGACTTATTAAGACATAGAACTATGCGGATCCCCGGGTTAATTAA	AATTATACAGTACATCATCAAGCTCAACAAGCTCCTCTGCCACCAAAAACCGGATCCCCGGGTTAATTAA	GAAAACCGGACCAGGAATAGACGATCGTCTCATTTGCATCGAGTTCATCAGAATTCGAGCTCGTTTAAAC	0		0		0
YBR126W-A	YBR126W-A	2	476692	476898	+	GTTCTGGTGCAGATGGAACAGAACAATCGCAACAAGAGCACGAAGATATG	AAAAAGAGCAAATCAAGCGTCTCCACCAGTTGGACGGCATTCCTCACGCT	GAAAAAAAAAAAAGAAAAAGATCAAGGAACACATCACCCTGGGCACATCA	GTTCTGGTGCAGATGGAACAGAACAATCGCAACAAGAGCACGAAGATATGCGGATCCCCGGGTTAATTAA	AAAAAGAGCAAATCAAGCGTCTCCACCAGTTGGACGGCATTCCTCACGCTCGGATCCCCGGGTTAATTAA	GAAAAAAAAAAAAGAAAAAGATCAAGGAACACATCACCCTGGGCACATCAGAATTCGAGCTCGTTTAAAC	1	YBR126W-B	1	YBR126W-B	0
YBR126W-B	YBR126W-B	2	476769	476912	+	GAACAACAGCATCAACCACAGAACGGACCGCTCGACTATGCTCACATATG	AAGCGTCTCCACCAGTTGGACGGCATTCCTCACGCTTGATGTGCCCAGGG	CATAATCCGTAATTGAAAAAAAAAAAAGAAAAAGATCAAGGAACACATCA	GAACAACAGCATCAACCACAGAACGGACCGCTCGACTATGCTCACATATGCGGATCCCCGGGTTAATTAA	AAGCGTCTCCACCAGTTGGACGGCATTCCTCACGCTTGATGTGCCCAGGGCGGATCCCCGGGTTAATTAA	CATAATCCGTAATTGAAAAAAAAAAAAGAAAAAGATCAAGGAACACATCAGAATTCGAGCTCGTTTAAAC	1	YBR126W-A	1	YBR126W-A	0
YBR127C	VMA2,ATPSV,VAT2	2	477108	478661	-	GATTGTAAGAGTAGACAGTACATCAAGCGAAAATAAATATTGCAGGAATG	CAAGAAGCTCCGGTAAGAAGAAGGACGCCAGCCAAGAAGAATCTCTAATC	AAAAACGGACAAAATAAAAAAAGCCTTTTTCTTCAGCAACCGTCCTCTTA	GATTGTAAGAGTAGACAGTACATCAAGCGAAAATAAATATTGCAGGAATGCGGATCCCCGGGTTAATTAA	CAAGAAGCTCCGGTAAGAAGAAGGACGCCAGCCAAGAAGAATCTCTAATCCGGATCCCCGGGTTAATTAA	AAAAACGGACAAAATAAAAAAAGCCTTTTTCTTCAGCAACCGTCCTCTTAGAATTCGAGCTCGTTTAAAC	0		0		0
YBR128C	ATG14,APG14,CVT12	2	478919	479953	-	TAGAGAAAAAGGGAAGTAAAAGTTAAAAACTAGAATCCTAGTATGACATG	CACCACCTCCGGCAGTCACAGGACCTCATGACCGATGGTACGTGGTAGGC	TGACTACATGCAACTTTATACACACGGCAGGAAAAAAAGTGCGCACTCTA	TAGAGAAAAAGGGAAGTAAAAGTTAAAAACTAGAATCCTAGTATGACATGCGGATCCCCGGGTTAATTAA	CACCACCTCCGGCAGTCACAGGACCTCATGACCGATGGTACGTGGTAGGCCGGATCCCCGGGTTAATTAA	TGACTACATGCAACTTTATACACACGGCAGGAAAAAAAGTGCGCACTCTAGAATTCGAGCTCGTTTAAAC	0		0		0
YBR129C	OPY1	2	480191	481177	-	CCATAAATAATTACGCTAATTTTGCCTTGGTAAATTTCATAAGACCAATG	ATTTCAAGAGTGGAATTTTGATAAGAAAAAAATTAAAGGCCGAAAATATA	TAGTACAAAGAAAAAAAAAGTCAATACATATTCATCATTGGCATTGCTTA	CCATAAATAATTACGCTAATTTTGCCTTGGTAAATTTCATAAGACCAATGCGGATCCCCGGGTTAATTAA	ATTTCAAGAGTGGAATTTTGATAAGAAAAAAATTAAAGGCCGAAAATATACGGATCCCCGGGTTAATTAA	TAGTACAAAGAAAAAAAAAGTCAATACATATTCATCATTGGCATTGCTTAGAATTCGAGCTCGTTTAAAC	0		0		0
YBR130C	SHE3	2	481430	482707	-	TCGTCTATCAAGCACGCCAAGGTTCAACGACACTACTTTTGTGTAAGATG	CCACTCATAAGAAAAAGAGAAATAGTATGGTTGTTCACGGGGCCCAATCC	ATTATCTAAATGAATCCTATATATATACTCCCTTGTGTCGGCATATTCTA	TCGTCTATCAAGCACGCCAAGGTTCAACGACACTACTTTTGTGTAAGATGCGGATCCCCGGGTTAATTAA	CCACTCATAAGAAAAAGAGAAATAGTATGGTTGTTCACGGGGCCCAATCCCGGATCCCCGGGTTAATTAA	ATTATCTAAATGAATCCTATATATATACTCCCTTGTGTCGGCATATTCTAGAATTCGAGCTCGTTTAAAC	0		0		0
YBR131W	CCZ1,CVT16	2	483001	485115	+	TACATTCTAAATCGTACGACTATTAAATTGATATATGAAAGACGGATATG	TTCAAAGTTTAGGTCGTGACGTGACTGACTGGTGGGAATCCAGGGAAATT	GTTACTTATTTTTATTCTATGTCTATCAAATGCTAAACGTTACATTTTTA	TACATTCTAAATCGTACGACTATTAAATTGATATATGAAAGACGGATATGCGGATCCCCGGGTTAATTAA	TTCAAAGTTTAGGTCGTGACGTGACTGACTGGTGGGAATCCAGGGAAATTCGGATCCCCGGGTTAATTAA	GTTACTTATTTTTATTCTATGTCTATCAAATGCTAAACGTTACATTTTTAGAATTCGAGCTCGTTTAAAC	1	YBR131C-A	1	YBR131C-A	0
YBR131C-A	YBR131C-A	2	483488	483577	-	ATAACTCTTTTTATCTAAAAGAATATTCTGCAAGATTATAGCGTCCCATG	AGAGGAATGTTGAAAATTTGCCCTTTTATAAAAACCAGGCCACATTACAG	CTGGAATGATATTTATTTGAATCTAGAAACTGTAACGAATAGGTCATTTA	ATAACTCTTTTTATCTAAAAGAATATTCTGCAAGATTATAGCGTCCCATGCGGATCCCCGGGTTAATTAA	AGAGGAATGTTGAAAATTTGCCCTTTTATAAAAACCAGGCCACATTACAGCGGATCCCCGGGTTAATTAA	CTGGAATGATATTTATTTGAATCTAGAAACTGTAACGAATAGGTCATTTAGAATTCGAGCTCGTTTAAAC	1	YBR131W	1	YBR131W	0
YBR132C	AGP2	2	485493	487283	-	CCCCCCTAAGCTGCACTTACATTTTGCTTCCATAACTTTTGCCAAGCATG	ACCATGAGATTGAAAGCTCCTTCGAAAAATTTCAATATTATAGCAAAGCA	TTTGGAGGCAGTCAATGTAAATTTGTGAATATAACGACATAATTGCATTA	CCCCCCTAAGCTGCACTTACATTTTGCTTCCATAACTTTTGCCAAGCATGCGGATCCCCGGGTTAATTAA	ACCATGAGATTGAAAGCTCCTTCGAAAAATTTCAATATTATAGCAAAGCACGGATCCCCGGGTTAATTAA	TTTGGAGGCAGTCAATGTAAATTTGTGAATATAACGACATAATTGCATTAGAATTCGAGCTCGTTTAAAC	0		0		0
YBR133C	HSL7	2	487645	490128	-	TTCTTTTATACATATAATTTTATATATACAAAGGGTTCAGTTTGCATATG	GTGTTTCCACGCTACATAATGTCTGTGGCAGAGCCTTTTCCCTGCCTCTG	TATGGATAGTTATTTGTTGCCGCAGTATATAGTATACAATGCAGAATTCA	TTCTTTTATACATATAATTTTATATATACAAAGGGTTCAGTTTGCATATGCGGATCCCCGGGTTAATTAA	GTGTTTCCACGCTACATAATGTCTGTGGCAGAGCCTTTTCCCTGCCTCTGCGGATCCCCGGGTTAATTAA	TATGGATAGTTATTTGTTGCCGCAGTATATAGTATACAATGCAGAATTCAGAATTCGAGCTCGTTTAAAC	1	YBR134W	1	YBR134W	0
YBR134W	YBR134W	2	490084	490490	+	TGACTAGAGACATTTTCTAGGAAACGTGACTTTTTGCTGTGCTGTTTATG	AGAATTTTCAGATAAAACAGTACTCGAGCCCTGAGATCTGTTTTAGGGTC	TACCACGAGAAAAAAAAATCACCTGACATATTTTTATAACCCGCCTTTTA	TGACTAGAGACATTTTCTAGGAAACGTGACTTTTTGCTGTGCTGTTTATGCGGATCCCCGGGTTAATTAA	AGAATTTTCAGATAAAACAGTACTCGAGCCCTGAGATCTGTTTTAGGGTCCGGATCCCCGGGTTAATTAA	TACCACGAGAAAAAAAAATCACCTGACATATTTTTATAACCCGCCTTTTAGAATTCGAGCTCGTTTAAAC	1	YBR133C	1	YBR133C	0
YBR135W	CKS1	2	490700	491152	+	TTGGATACAACTAGATTGACACGCACTTACTCTCGTCTTACAGTACTATG	ATCAAACACAATCGATTTCGAACGATATGCAAGTTCCACCTCAAGTCTCC	GGAGCCTTGAAAAGGAATTCAATTTCAGTAATTAGAGTATATCAAAGCTA	TTGGATACAACTAGATTGACACGCACTTACTCTCGTCTTACAGTACTATGCGGATCCCCGGGTTAATTAA	ATCAAACACAATCGATTTCGAACGATATGCAAGTTCCACCTCAAGTCTCCCGGATCCCCGGGTTAATTAA	GGAGCCTTGAAAAGGAATTCAATTTCAGTAATTAGAGTATATCAAAGCTAGAATTCGAGCTCGTTTAAAC	0		0		0
YBR136W	MEC1,SAD3,ESR1	2	491516	498621	+	CTGGACAACAAGAACGACATACACCGCGTAAAGGCCCACAAGACTGCATG	CATCAGAAGACAATCTAAGCAAGATGTATATTGGTTGGCTTCCATTTTGG	TTAGATCAAGAGGAAGTTCGTCTGTTGCCGAAAATGGTGGAAAGTCGTTA	CTGGACAACAAGAACGACATACACCGCGTAAAGGCCCACAAGACTGCATGCGGATCCCCGGGTTAATTAA	CATCAGAAGACAATCTAAGCAAGATGTATATTGGTTGGCTTCCATTTTGGCGGATCCCCGGGTTAATTAA	TTAGATCAAGAGGAAGTTCGTCTGTTGCCGAAAATGGTGGAAAGTCGTTAGAATTCGAGCTCGTTTAAAC	0		0		0
YBR137W	YBR137W	2	498891	499430	+	TATTATAAGAGCAAATTATTCAAAAAAAGTCTACGGAGAAAATTATTATG	CTTTAATTGCATTTGCTAATGAAAGTCTAGAAGAAGATTTGAATTTGGAT	AAATATTCTATGGTGTTCAAGCCTCTATTTTACTTCTACCTACATTCTCA	TATTATAAGAGCAAATTATTCAAAAAAAGTCTACGGAGAAAATTATTATGCGGATCCCCGGGTTAATTAA	CTTTAATTGCATTTGCTAATGAAAGTCTAGAAGAAGATTTGAATTTGGATCGGATCCCCGGGTTAATTAA	AAATATTCTATGGTGTTCAAGCCTCTATTTTACTTCTACCTACATTCTCAGAATTCGAGCTCGTTTAAAC	0		0		0
YBR138C	YBR138C	2	499609	501183	-	TCTCGAAAACTTGATCCAACCACTAATTAAAAGGTTAAAATTAAAGGATG	TTCCGCATTTCTTACGCAATCAAAATAGTGATCGTTTAAATTTTCAACCT	CACCAATGCAGTCCTGTTTGTTTTAGTGATCTCTTAGCAATGTATTTTCA	TCTCGAAAACTTGATCCAACCACTAATTAAAAGGTTAAAATTAAAGGATGCGGATCCCCGGGTTAATTAA	TTCCGCATTTCTTACGCAATCAAAATAGTGATCGTTTAAATTTTCAACCTCGGATCCCCGGGTTAATTAA	CACCAATGCAGTCCTGTTTGTTTTAGTGATCTCTTAGCAATGTATTTTCAGAATTCGAGCTCGTTTAAAC	0		0		0
YBR139W	YBR139W	2	501511	503037	+	GCATTTTTTCTTTAAAACAGCTATACAAAAAGTGATACCGACATACAATG	TTTCCGGTAATCGTGCTTTTTCGGATCTTTCCACCTTGGAAAATGCTAGT	AAGTATAATGATTGCAAGGTTAAGAGTGAAACATTTTTAGAGCACTACTA	GCATTTTTTCTTTAAAACAGCTATACAAAAAGTGATACCGACATACAATGCGGATCCCCGGGTTAATTAA	TTTCCGGTAATCGTGCTTTTTCGGATCTTTCCACCTTGGAAAATGCTAGTCGGATCCCCGGGTTAATTAA	AAGTATAATGATTGCAAGGTTAAGAGTGAAACATTTTTAGAGCACTACTAGAATTCGAGCTCGTTTAAAC	0		0		0
YBR140C	IRA1,PPD1,GLC1	2	503197	512475	-	TTCTTCTTCAGCATATAACATACAACAAGATTAAGGCTCTTTCTAAAATG	ATAAGAGAAAAAGATTAGCAACAATGATACTGGCAAGAATGTCGTGTTCC	ATTATAAGGAAAAACGTATATAATCACTGCAATACTCTAATTTAAAATTA	TTCTTCTTCAGCATATAACATACAACAAGATTAAGGCTCTTTCTAAAATGCGGATCCCCGGGTTAATTAA	ATAAGAGAAAAAGATTAGCAACAATGATACTGGCAAGAATGTCGTGTTCCCGGATCCCCGGGTTAATTAA	ATTATAAGGAAAAACGTATATAATCACTGCAATACTCTAATTTAAAATTAGAATTCGAGCTCGTTTAAAC	0		0		0
YBR141C	YBR141C	2	512871	513884	-	TTGATGACAATCTTGTGTCAGCTTAGCGATAACACTAATACAGCGGAATG	GAATCAAGGTTAACGACGGCCCTGGGTTGAACAATTTTGGTATTACCCTC	CTATATTGTATCCCTTTATGAAAAACTTCCAGGCGGTGTCGGCTCGCTTA	TTGATGACAATCTTGTGTCAGCTTAGCGATAACACTAATACAGCGGAATGCGGATCCCCGGGTTAATTAA	GAATCAAGGTTAACGACGGCCCTGGGTTGAACAATTTTGGTATTACCCTCCGGATCCCCGGGTTAATTAA	CTATATTGTATCCCTTTATGAAAAACTTCCAGGCGGTGTCGGCTCGCTTAGAATTCGAGCTCGTTTAAAC	1	YBR141W-A	1	YBR141W-A	0
YBR141W-A	YBR141W-A	2	513013	513108	+	GATACAAACAATAGTACAACTTATTACTTTGATGGCTATTAAGCATTATG	CGCAGTATCTTGAGTGCGTCACACAGGCTTGTGGCAGAACAATAAAGATG	CGCGGTGCAATGTGCCATCGCATGGTCAAATTTCTCAAGCCGCAAGGCTA	GATACAAACAATAGTACAACTTATTACTTTGATGGCTATTAAGCATTATGCGGATCCCCGGGTTAATTAA	CGCAGTATCTTGAGTGCGTCACACAGGCTTGTGGCAGAACAATAAAGATGCGGATCCCCGGGTTAATTAA	CGCGGTGCAATGTGCCATCGCATGGTCAAATTTCTCAAGCCGCAAGGCTAGAATTCGAGCTCGTTTAAAC	1	YBR141C	1	YBR141C	0
YBR142W	MAK5	2	514163	516485	+	AGGTAGAAATTCTTTAGTCAAATATCGGCATAATCAGTTTTTCCATCATG	AAAAGACAAACGCCTTAGAAACTTTGAAGAAAAAGAAAAAGAGAAATAAT	CGTAGAAAATACAGTGAAAGGAGAGTTTCTCTTCAAAAGCCTCGAGATTA	AGGTAGAAATTCTTTAGTCAAATATCGGCATAATCAGTTTTTCCATCATGCGGATCCCCGGGTTAATTAA	AAAAGACAAACGCCTTAGAAACTTTGAAGAAAAAGAAAAAGAGAAATAATCGGATCCCCGGGTTAATTAA	CGTAGAAAATACAGTGAAAGGAGAGTTTCTCTTCAAAAGCCTCGAGATTAGAATTCGAGCTCGTTTAAAC	0		0		0
YBR143C	SUP45,SUP47,SUP1,SAL4	2	516717	518030	-	GTCTCCTTATTAAGACTACAGAAATAGACAAAGGAAATACTTCAATAATG	CTGAGGATGAATATTATGACGAAGATGAAGGATCCGACTATGATTTCATT	GATCAAATTCTTTTTGATTCGATTTTTTTCTCCCCCTTTTATTTTATTTA	GTCTCCTTATTAAGACTACAGAAATAGACAAAGGAAATACTTCAATAATGCGGATCCCCGGGTTAATTAA	CTGAGGATGAATATTATGACGAAGATGAAGGATCCGACTATGATTTCATTCGGATCCCCGGGTTAATTAA	GATCAAATTCTTTTTGATTCGATTTTTTTCTCCCCCTTTTATTTTATTTAGAATTCGAGCTCGTTTAAAC	0		0		0
YBR144C	YBR144C	2	519083	519395	-	ACGATCCCGCGTCAGCAGATGTCACAATTTGATTATTTCATTGTCACATG	TCATGAAGATACTACTTGTAAAAATATATACATCCTTCTTTTTCATGTGC	TCCTCGAAGTTGCGTCGAAGATGAATGACAGTAGTTGCTAATTCTTACTA	ACGATCCCGCGTCAGCAGATGTCACAATTTGATTATTTCATTGTCACATGCGGATCCCCGGGTTAATTAA	TCATGAAGATACTACTTGTAAAAATATATACATCCTTCTTTTTCATGTGCCGGATCCCCGGGTTAATTAA	TCCTCGAAGTTGCGTCGAAGATGAATGACAGTAGTTGCTAATTCTTACTAGAATTCGAGCTCGTTTAAAC	0		0		0
YBR145W	ADH5	2	519613	520668	+	ATACCTAAGAAAGTTATTTAACTACATATCTACAAAATCAAAGCATCATG	AGATGGAGAAGGGTGAAATTGTTGGTAGATATGTTGTTGAGACTTCTAAA	ACTTATATAAAAAGTAAAAATATATTCATCAAATTCGTTACAAAAGATCA	ATACCTAAGAAAGTTATTTAACTACATATCTACAAAATCAAAGCATCATGCGGATCCCCGGGTTAATTAA	AGATGGAGAAGGGTGAAATTGTTGGTAGATATGTTGTTGAGACTTCTAAACGGATCCCCGGGTTAATTAA	ACTTATATAAAAAGTAAAAATATATTCATCAAATTCGTTACAAAAGATCAGAATTCGAGCTCGTTTAAAC	0		0		0
YBR146W	MRPS9	2	521109	521945	+	TTGGTTAGCTAGTTTACTCGTTGTGGACAGAGTTTGAGCCAAGCGGAATG	AGAAGCCAGGAAAAAAGAAGGCAAGAAAGATGCCAACATGGGTCAAGAGA	AGCACGCACACTTCCGTTCGAAATTGAGGTAACAAGATGCACTAAGACTA	TTGGTTAGCTAGTTTACTCGTTGTGGACAGAGTTTGAGCCAAGCGGAATGCGGATCCCCGGGTTAATTAA	AGAAGCCAGGAAAAAAGAAGGCAAGAAAGATGCCAACATGGGTCAAGAGACGGATCCCCGGGTTAATTAA	AGCACGCACACTTCCGTTCGAAATTGAGGTAACAAGATGCACTAAGACTAGAATTCGAGCTCGTTTAAAC	0		0		0
YBR147W	YBR147W	2	522424	523347	+	ATAACCCAGACGTAATAGCCTCAAGCGAGCATCCCTAAATTTCTGCCATG	AATTTTTCCTTTACGCCAAACCTAAATACGAGAAAATACTAATAGATAAT	TGAGTAAGTTTGAGTTTTAAGTGGAAAGATTAGTAGAAGCCAACTAGTTA	ATAACCCAGACGTAATAGCCTCAAGCGAGCATCCCTAAATTTCTGCCATGCGGATCCCCGGGTTAATTAA	AATTTTTCCTTTACGCCAAACCTAAATACGAGAAAATACTAATAGATAATCGGATCCCCGGGTTAATTAA	TGAGTAAGTTTGAGTTTTAAGTGGAAAGATTAGTAGAAGCCAACTAGTTAGAATTCGAGCTCGTTTAAAC	0		0		0
YBR148W	YSW1	2	523758	525587	+	TGCACCGGTGTATTAACATATATAAGGATACGTACGAACATAACATCATG	GTACAAAGTTGATAAAAGACAGCAAGAATGGCGCCTCCACCTTAACATCT	GATACTTAATGATTATATACTAGTAGCATTTTCAGTAAACGAAATTGTTA	TGCACCGGTGTATTAACATATATAAGGATACGTACGAACATAACATCATGCGGATCCCCGGGTTAATTAA	GTACAAAGTTGATAAAAGACAGCAAGAATGGCGCCTCCACCTTAACATCTCGGATCCCCGGGTTAATTAA	GATACTTAATGATTATATACTAGTAGCATTTTCAGTAAACGAAATTGTTAGAATTCGAGCTCGTTTAAAC	0		0		0
YBR149W	ARA1	2	525870	526904	+	TCCGCCTTCAATTGATAAAAGCGTCTTGATTTTAATCAACTGCTATCATG	TCCTTCCAGAGTTTACTGGTAACGGACCAAACTTGGACAATTTAAAGTAT	AGAAGATTAAGAAGCGAACTAAATAAAGTGAAAATAAAGTCGTTGTCTTA	TCCGCCTTCAATTGATAAAAGCGTCTTGATTTTAATCAACTGCTATCATGCGGATCCCCGGGTTAATTAA	TCCTTCCAGAGTTTACTGGTAACGGACCAAACTTGGACAATTTAAAGTATCGGATCCCCGGGTTAATTAA	AGAAGATTAAGAAGCGAACTAAATAAAGTGAAAATAAAGTCGTTGTCTTAGAATTCGAGCTCGTTTAAAC	0		0		0
YBR150C	TBS1	2	527095	530358	-	TCTTTTTTAAGTTAACAATGATTACAAGCCCAGCAGGAGTTGTGTGAATG	TTTTTTTTTACGATCGGGATTTCTTCTTCAAGAATGTGTGTGTAAAAATG	GTATGCATATGTATTAGTTAAATTACTCGAATGTCCTTTATATAATATTA	TCTTTTTTAAGTTAACAATGATTACAAGCCCAGCAGGAGTTGTGTGAATGCGGATCCCCGGGTTAATTAA	TTTTTTTTTACGATCGGGATTTCTTCTTCAAGAATGTGTGTGTAAAAATGCGGATCCCCGGGTTAATTAA	GTATGCATATGTATTAGTTAAATTACTCGAATGTCCTTTATATAATATTAGAATTCGAGCTCGTTTAAAC	0		0		0
YBR151W	APD1	2	530893	531843	+	GGCAAGAAGGCGGCCAAGAGAGAGATATCTTCTTTGTCCTTTGAATTATG	CGTTGCCGTTTCCCGAAAAAGTTCGCTGTATTAAGAAATATCAAAGCTGG	ATGGCAAATTGTATGGCGTCAAAAGATTGTATTTTGCTGGCCAACCTTTA	GGCAAGAAGGCGGCCAAGAGAGAGATATCTTCTTTGTCCTTTGAATTATGCGGATCCCCGGGTTAATTAA	CGTTGCCGTTTCCCGAAAAAGTTCGCTGTATTAAGAAATATCAAAGCTGGCGGATCCCCGGGTTAATTAA	ATGGCAAATTGTATGGCGTCAAAAGATTGTATTTTGCTGGCCAACCTTTAGAATTCGAGCTCGTTTAAAC	0		0		0
YBR152W	SPP381	2	532241	533116	+	AGCTAGATTAAGAATTTTTTTTTGATTACTGATTTGAATCACATACGATG	ACCTAGGCAAGAATAGTAGAGATTACGAAGAAACTGAATATTCGGTTATA	ACATCAACTAACTGAAAGGCATGTGGGTTTGTGTGTGTGATGCGGTGTTA	AGCTAGATTAAGAATTTTTTTTTGATTACTGATTTGAATCACATACGATGCGGATCCCCGGGTTAATTAA	ACCTAGGCAAGAATAGTAGAGATTACGAAGAAACTGAATATTCGGTTATACGGATCCCCGGGTTAATTAA	ACATCAACTAACTGAAAGGCATGTGGGTTTGTGTGTGTGATGCGGTGTTAGAATTCGAGCTCGTTTAAAC	0		0		0
YBR153W	RIB7	2	533325	534059	+	AACCTATTGATAGCCTCTTTGTATTACTATCAACATTTTTAGAAGATATG	GGTGGAAGGGCATTACCGATGTGGTGCTTTGTGCAAGACTGGCCGATGAC	CACTAATTTCAGAAAGGAATTACACAGAAGGTGGAGTTCTAACACTATTA	AACCTATTGATAGCCTCTTTGTATTACTATCAACATTTTTAGAAGATATGCGGATCCCCGGGTTAATTAA	GGTGGAAGGGCATTACCGATGTGGTGCTTTGTGCAAGACTGGCCGATGACCGGATCCCCGGGTTAATTAA	CACTAATTTCAGAAAGGAATTACACAGAAGGTGGAGTTCTAACACTATTAGAATTCGAGCTCGTTTAAAC	0		0		0
YBR154C	RPB5	2	534227	534874	-	ATTTACAAAATTTGTGCGCAGGTGGATATTACTAATAAGCTAAGACAATG	TAAGAAAAAGTGAAACCTCTGGTCGTTATGCCAGTTACAGAATCTGTATG	TTCTTGTTATTTTATATTATATGAAAGGGATAAATCCAAATGCCACTCTA	ATTTACAAAATTTGTGCGCAGGTGGATATTACTAATAAGCTAAGACAATGCGGATCCCCGGGTTAATTAA	TAAGAAAAAGTGAAACCTCTGGTCGTTATGCCAGTTACAGAATCTGTATGCGGATCCCCGGGTTAATTAA	TTCTTGTTATTTTATATTATATGAAAGGGATAAATCCAAATGCCACTCTAGAATTCGAGCTCGTTTAAAC	0		0		0
YBR155W	CNS1	2	535635	536792	+	ACATTCTAGCAAGTAAAAGAAAAGAATAAATTGGTTTTGCATCTAAAATG	GGTGGATTTCCAAGTGGGATAAGCAAAAAGCCTTAGAAAGAAGATCTGTG	ATTTCTATCTACAACTTTGCGTTACATATTTTTAACTATTTGACACTTCA	ACATTCTAGCAAGTAAAAGAAAAGAATAAATTGGTTTTGCATCTAAAATGCGGATCCCCGGGTTAATTAA	GGTGGATTTCCAAGTGGGATAAGCAAAAAGCCTTAGAAAGAAGATCTGTGCGGATCCCCGGGTTAATTAA	ATTTCTATCTACAACTTTGCGTTACATATTTTTAACTATTTGACACTTCAGAATTCGAGCTCGTTTAAAC	0		0		0
YBR156C	SLI15	2	536968	539064	-	GTATCTCCTCAACTGACGGACTTTGAAAGAGCCCGAAGATTTAAACAATG	ATCCTAGGCTAAACAGGTTGAAACCGCGTCAAATTGTGCCCAAAAGGCCT	ATTTAATGTTAACCAGTTTGAATTTTTCTTTTCTGGGGTAATCGAATTCA	GTATCTCCTCAACTGACGGACTTTGAAAGAGCCCGAAGATTTAAACAATGCGGATCCCCGGGTTAATTAA	ATCCTAGGCTAAACAGGTTGAAACCGCGTCAAATTGTGCCCAAAAGGCCTCGGATCCCCGGGTTAATTAA	ATTTAATGTTAACCAGTTTGAATTTTTCTTTTCTGGGGTAATCGAATTCAGAATTCGAGCTCGTTTAAAC	0		0		0
YBR157C	ICS2	2	539407	540174	-	CACCACCTTCGTTATTACTTCACTGAAGTTTCCCTTTACAGCAAGATATG	AAACTGGAGACATATTGCAACCACTAATTGACTTAGATATTGACAATAAA	ATTTATCAAAACAAACGAAAAAAAAAAATGCGAGACAAATGATCCAGTCA	CACCACCTTCGTTATTACTTCACTGAAGTTTCCCTTTACAGCAAGATATGCGGATCCCCGGGTTAATTAA	AAACTGGAGACATATTGCAACCACTAATTGACTTAGATATTGACAATAAACGGATCCCCGGGTTAATTAA	ATTTATCAAAACAAACGAAAAAAAAAAATGCGAGACAAATGATCCAGTCAGAATTCGAGCTCGTTTAAAC	0		0		0
YBR158W	AMN1,CST13,ICS4	2	542411	544060	+	TTTGATAATTTATCATTTTCCTTTTCTGTTAGTAAAGCACCCATTAAATG	ATATGACAGCTTGGGTTAATGCAGACGACGAAATAGAGAATAATGTGGAC	CTGGTGGTCTGTTGTGTACTATTTATAGGTAAAGTCACAAAAACCATCTA	TTTGATAATTTATCATTTTCCTTTTCTGTTAGTAAAGCACCCATTAAATGCGGATCCCCGGGTTAATTAA	ATATGACAGCTTGGGTTAATGCAGACGACGAAATAGAGAATAATGTGGACCGGATCCCCGGGTTAATTAA	CTGGTGGTCTGTTGTGTACTATTTATAGGTAAAGTCACAAAAACCATCTAGAATTCGAGCTCGTTTAAAC	0		0		0
YBR159W	IFA38	2	544547	545590	+	AAGAACAGTCTTCAAAGCAATCAATTCGTGTCGGTGCAGCTTAAGAAATG	CTATCAGAATTAGAGCCTTAAAAAAAGCCGCAAGACAGGTTAAAAAGGAA	ATATATATATATATGTATTGTATAAAACTATCTCGAGAACGATAATTCTA	AAGAACAGTCTTCAAAGCAATCAATTCGTGTCGGTGCAGCTTAAGAAATGCGGATCCCCGGGTTAATTAA	CTATCAGAATTAGAGCCTTAAAAAAAGCCGCAAGACAGGTTAAAAAGGAACGGATCCCCGGGTTAATTAA	ATATATATATATATGTATTGTATAAAACTATCTCGAGAACGATAATTCTAGAATTCGAGCTCGTTTAAAC	0		0		0
YBR160W	CDC28,SRM5,HSL5,CDK1	2	545942	546838	+	AGCTACAGTGGAAAATAGCCCAGATCAAATAGAACTATCCTTCGAACATG	ACCGGATTAGCGCCAGAAGAGCAGCCATCCACCCCTACTTCCAAGAATCA	ACAGTGCAGTAGCATTTGTAATATAATAGCGAAATAGATTATAATGCTTA	AGCTACAGTGGAAAATAGCCCAGATCAAATAGAACTATCCTTCGAACATGCGGATCCCCGGGTTAATTAA	ACCGGATTAGCGCCAGAAGAGCAGCCATCCACCCCTACTTCCAAGAATCACGGATCCCCGGGTTAATTAA	ACAGTGCAGTAGCATTTGTAATATAATAGCGAAATAGATTATAATGCTTAGAATTCGAGCTCGTTTAAAC	0		0		0
YBR161W	CSH1	2	547501	548631	+	ACCTTACAACAGTGCTAAAGTAGTTACAGTAAACCAATTAATACGTGATG	GCGTTTTCCTTGATATAGAAAAGAATCACGCAAAATTTACCGACTTAACC	TTTATCCATGCTCACAATATTATAGGGGTAGAACAGTGACAATTCAATCA	ACCTTACAACAGTGCTAAAGTAGTTACAGTAAACCAATTAATACGTGATGCGGATCCCCGGGTTAATTAA	GCGTTTTCCTTGATATAGAAAAGAATCACGCAAAATTTACCGACTTAACCCGGATCCCCGGGTTAATTAA	TTTATCCATGCTCACAATATTATAGGGGTAGAACAGTGACAATTCAATCAGAATTCGAGCTCGTTTAAAC	0		0		0
YBR162C	TOS1	2	549070	550437	-	TACACCCCATAAAATATCTAAAACCTAACGGAATTTGAACGAAAAAAATG	ATGTCGTTGACCAATGGTTGAGCAAGTCCGGTTCTTCTGCGGCCTTGCCA	ATAAATGAAAAAAAGGAAAATTTTATTGGTTAATAAGAAACGATCGACTA	TACACCCCATAAAATATCTAAAACCTAACGGAATTTGAACGAAAAAAATGCGGATCCCCGGGTTAATTAA	ATGTCGTTGACCAATGGTTGAGCAAGTCCGGTTCTTCTGCGGCCTTGCCACGGATCCCCGGGTTAATTAA	ATAAATGAAAAAAAGGAAAATTTTATTGGTTAATAAGAAACGATCGACTAGAATTCGAGCTCGTTTAAAC	0		0		0
YBR162W-A	YSY6	2	551098	551295	+	AAATAACAGGGTGCAGAGGTCGAAGTAGATAGAGGACAATACCTGCGATG	TGTTTCTTCTCGTCGGTGGTGGTGTTTTGCAATTAATCAGCTATATCCTA	ACGTACTTGCTTCCACTGTACACTTATATATGTAATTTGCCACTGCTTCA	AAATAACAGGGTGCAGAGGTCGAAGTAGATAGAGGACAATACCTGCGATGCGGATCCCCGGGTTAATTAA	TGTTTCTTCTCGTCGGTGGTGGTGTTTTGCAATTAATCAGCTATATCCTACGGATCCCCGGGTTAATTAA	ACGTACTTGCTTCCACTGTACACTTATATATGTAATTTGCCACTGCTTCAGAATTCGAGCTCGTTTAAAC	0		0		0
YBR163W	DEM1	2	551590	553347	+	TCTTAATTTTTCAAGTAGGCTTTCTGCTTTTCTTCCGTACTTATCGTATG	TTGATCTAGGGAAAGAATTAAAAAAAATTATTCTTGAATCAAGTATGAAG	ACAACACCCTTTTAATAACTAGAATAAATAATGTTACAATACCTACATTA	TCTTAATTTTTCAAGTAGGCTTTCTGCTTTTCTTCCGTACTTATCGTATGCGGATCCCCGGGTTAATTAA	TTGATCTAGGGAAAGAATTAAAAAAAATTATTCTTGAATCAAGTATGAAGCGGATCCCCGGGTTAATTAA	ACAACACCCTTTTAATAACTAGAATAAATAATGTTACAATACCTACATTAGAATTCGAGCTCGTTTAAAC	0		0		0
YBR164C	ARL1,DLP2	2	553742	554293	-	AGAAAGATATAAGAAGAAAGTTCCAGTAAAGTGAGTTATAGATCAAGATG	TTACCGAAGGTTTAGATTGGTTGATCGATGTTATAAAAGAGGAACAGTTA	CATTTAAAAAGTATGCATCTACACTTTTTTTTTGCAAATCTTTATCGCTA	AGAAAGATATAAGAAGAAAGTTCCAGTAAAGTGAGTTATAGATCAAGATGCGGATCCCCGGGTTAATTAA	TTACCGAAGGTTTAGATTGGTTGATCGATGTTATAAAAGAGGAACAGTTACGGATCCCCGGGTTAATTAA	CATTTAAAAAGTATGCATCTACACTTTTTTTTTGCAAATCTTTATCGCTAGAATTCGAGCTCGTTTAAAC	0		0		0
YBR165W	UBS1	2	554719	555552	+	AAGAGCTAAACAGACGTTTTTATATTTTAATCAAAAAGCTAATAATTATG	AAACAAACGATAATCGCGGTAGTGAGCATTACACAAAGAGGAAAAAAATC	GTGAAAAAAGGAAGAAAGTTCTACTATTCTATGTAAAAATAAACCCATCA	AAGAGCTAAACAGACGTTTTTATATTTTAATCAAAAAGCTAATAATTATGCGGATCCCCGGGTTAATTAA	AAACAAACGATAATCGCGGTAGTGAGCATTACACAAAGAGGAAAAAAATCCGGATCCCCGGGTTAATTAA	GTGAAAAAAGGAAGAAAGTTCTACTATTCTATGTAAAAATAAACCCATCAGAATTCGAGCTCGTTTAAAC	0		0		0
YBR166C	TYR1	2	555696	557054	-	TACCATAGCATTTGAAGGAAAGAGGACAGTATATCCACTTGATAAACATG	CCATTCTGAGTCATTCTAGTGAGCGTTCGGCCGCTGAAAAAAGAAATACA	TTTCACAAAGGAAGGCCTAATATTATAGGAAATCAGCATTAAAAACATTA	TACCATAGCATTTGAAGGAAAGAGGACAGTATATCCACTTGATAAACATGCGGATCCCCGGGTTAATTAA	CCATTCTGAGTCATTCTAGTGAGCGTTCGGCCGCTGAAAAAAGAAATACACGGATCCCCGGGTTAATTAA	TTTCACAAAGGAAGGCCTAATATTATAGGAAATCAGCATTAAAAACATTAGAATTCGAGCTCGTTTAAAC	0		0		0
YBR167C	POP7,RPP2	2	557320	557742	-	GCAATAAGATTGACGGTCAAAGAAGAAAAGAGAACTCTGCACCCAGGATG	CCCAACTAAAGAAAAGGGCTGTAAGCGGTGTAGAATTGCGTATTTATGTT	AGCTATAAATAGTATACAATAACAATGAGCGCTAAAAGTATGACATATTA	GCAATAAGATTGACGGTCAAAGAAGAAAAGAGAACTCTGCACCCAGGATGCGGATCCCCGGGTTAATTAA	CCCAACTAAAGAAAAGGGCTGTAAGCGGTGTAGAATTGCGTATTTATGTTCGGATCCCCGGGTTAATTAA	AGCTATAAATAGTATACAATAACAATGAGCGCTAAAAGTATGACATATTAGAATTCGAGCTCGTTTAAAC	0		0		0
YBR168W	PEX32	2	558222	559463	+	CTTAATTTAGTTCAGTGGACATCATTTTGCTAATTTCAAGGAAAGAAATG	TGGAAAGTTTTACCAGGTCAAGAAAATGGAAACGACGCCTCTTCCATTTG	TTAGGCAACCAACTATATATGCAGTTTAGAGGCTTAAAGCAATACTATTA	CTTAATTTAGTTCAGTGGACATCATTTTGCTAATTTCAAGGAAAGAAATGCGGATCCCCGGGTTAATTAA	TGGAAAGTTTTACCAGGTCAAGAAAATGGAAACGACGCCTCTTCCATTTGCGGATCCCCGGGTTAATTAA	TTAGGCAACCAACTATATATGCAGTTTAGAGGCTTAAAGCAATACTATTAGAATTCGAGCTCGTTTAAAC	0		0		0
YBR169C	SSE2	2	559766	561847	-	TTTTTTTTTTTTTACCTGTAACAGACGTAACCAAAGGATATAATATAATG	CTGCAAGTGATGATAGCGATGACAACAATGATGAAAACATGGACCTTGAT	TTGAGAAAGAATAAAGAGAGAACAATCCAAATAGACAAAGATTCCGATTA	TTTTTTTTTTTTTACCTGTAACAGACGTAACCAAAGGATATAATATAATGCGGATCCCCGGGTTAATTAA	CTGCAAGTGATGATAGCGATGACAACAATGATGAAAACATGGACCTTGATCGGATCCCCGGGTTAATTAA	TTGAGAAAGAATAAAGAGAGAACAATCCAAATAGACAAAGATTCCGATTAGAATTCGAGCTCGTTTAAAC	0		0		0
YBR170C	NPL4,HRD4	2	562192	563933	-	GAAAAATTTCCCTATACTACTGATATCGATATACATTTAAGTGAAGTATG	TCTCATCGGCTGGTTGGCAAACGTTAGTCATGATCCTTCAGGAAAGCGGC	CGCATTCCTATTTTTTTAATCTAAAACCTCAAATCTTACAGTCTCTCCTA	GAAAAATTTCCCTATACTACTGATATCGATATACATTTAAGTGAAGTATGCGGATCCCCGGGTTAATTAA	TCTCATCGGCTGGTTGGCAAACGTTAGTCATGATCCTTCAGGAAAGCGGCCGGATCCCCGGGTTAATTAA	CGCATTCCTATTTTTTTAATCTAAAACCTCAAATCTTACAGTCTCTCCTAGAATTCGAGCTCGTTTAAAC	0		0		0
YBR171W	SEC66,SEC71,HSS1	2	564210	564830	+	ATTCAAGTACAGGAAAGAGGTACGCACAACTACTTGAGTTTGCCAATATG	GTATTAAAGAGTGGGAGCTGAAAATAAATAATGATGGAAGATTAGTCAAT	AAAAAAACACTGAACGAGCGAATACATATCTTTGCACACAGTAGGCACTA	ATTCAAGTACAGGAAAGAGGTACGCACAACTACTTGAGTTTGCCAATATGCGGATCCCCGGGTTAATTAA	GTATTAAAGAGTGGGAGCTGAAAATAAATAATGATGGAAGATTAGTCAATCGGATCCCCGGGTTAATTAA	AAAAAAACACTGAACGAGCGAATACATATCTTTGCACACAGTAGGCACTAGAATTCGAGCTCGTTTAAAC	0		0		0
YBR172C	SMY2	2	564996	567218	-	TTCCTTCCTCCTCCCCTATATAATCAACTTCTCAGCCCACATCAATAATG	ACGACGGCTGGGAATTCCAAGTAGTGAGCAAGAAGAAGGGTAGAAAACAC	GATAAAGAAATATGCAGTGAAAAGAAAAGATTATGAAGCTTTTCCTTTCA	TTCCTTCCTCCTCCCCTATATAATCAACTTCTCAGCCCACATCAATAATGCGGATCCCCGGGTTAATTAA	ACGACGGCTGGGAATTCCAAGTAGTGAGCAAGAAGAAGGGTAGAAAACACCGGATCCCCGGGTTAATTAA	GATAAAGAAATATGCAGTGAAAAGAAAAGATTATGAAGCTTTTCCTTTCAGAATTCGAGCTCGTTTAAAC	0		0		0
YBR173C	UMP1	2	567573	568019	-	GAATGAGTATTAAATAGACAAGACCAGAAACAGCCTGCATACCAACTATG	CCATGGTAGGTGATGACGTCCACAGCAAAATCGAAAAACAATTAGGCATT	TTTCAATGGTTTACGTGACAGATGTATAAAGAAATTGAGAGCAATTTTTA	GAATGAGTATTAAATAGACAAGACCAGAAACAGCCTGCATACCAACTATGCGGATCCCCGGGTTAATTAA	CCATGGTAGGTGATGACGTCCACAGCAAAATCGAAAAACAATTAGGCATTCGGATCCCCGGGTTAATTAA	TTTCAATGGTTTACGTGACAGATGTATAAAGAAATTGAGAGCAATTTTTAGAATTCGAGCTCGTTTAAAC	0		0		0
YBR174C	YBR174C	2	568185	568499	-	GCGCTGTATGGCCGATAAAGGTGTGCAGCAGCCCATAAGATAAATGAATG	ACTTGCAAATGAATGAGCCTACGCTCAAACTTTCCAATATCTACCGCCAG	GTTACCCGAGGAGTGAAAAAAGCAAGACCATAAGAAATGCTTGTGCATCA	GCGCTGTATGGCCGATAAAGGTGTGCAGCAGCCCATAAGATAAATGAATGCGGATCCCCGGGTTAATTAA	ACTTGCAAATGAATGAGCCTACGCTCAAACTTTCCAATATCTACCGCCAGCGGATCCCCGGGTTAATTAA	GTTACCCGAGGAGTGAAAAAAGCAAGACCATAAGAAATGCTTGTGCATCAGAATTCGAGCTCGTTTAAAC	1	YBR175W	1	YBR175W	0
YBR175W	SWD3,SAF35,CPS30	2	568255	569202	+	GTTTGAGCGTAGGCTCATTCATTTGCAAGTGGCCATTATATGCTAACATG	TAATGTGTTCCCTTGCATTGAATGGAGATTGCTGTTTATGGAGATGGGTT	GTGTTACACCTTAAGGGAATGTCTGTCGTGTACATAACGCAGATTCTTTA	GTTTGAGCGTAGGCTCATTCATTTGCAAGTGGCCATTATATGCTAACATGCGGATCCCCGGGTTAATTAA	TAATGTGTTCCCTTGCATTGAATGGAGATTGCTGTTTATGGAGATGGGTTCGGATCCCCGGGTTAATTAA	GTGTTACACCTTAAGGGAATGTCTGTCGTGTACATAACGCAGATTCTTTAGAATTCGAGCTCGTTTAAAC	1	YBR174C	1	YBR174C	0
YBR176W	ECM31	2	569566	570504	+	TTAATAAATTAGCTTGCCATAAAATTAGGGAAATTTTTACTCACAATATG	AAGTTAAGGAGGACTTATGGAATGAATTTCTCTCTTCAATTAACGAAAAG	AAAATTTAAAGTTTTTTTCCCTATGCAGTGATTTTTATCTATATATTTTA	TTAATAAATTAGCTTGCCATAAAATTAGGGAAATTTTTACTCACAATATGCGGATCCCCGGGTTAATTAA	AAGTTAAGGAGGACTTATGGAATGAATTTCTCTCTTCAATTAACGAAAAGCGGATCCCCGGGTTAATTAA	AAAATTTAAAGTTTTTTTCCCTATGCAGTGATTTTTATCTATATATTTTAGAATTCGAGCTCGTTTAAAC	0		0		0
YBR177C	EHT1	2	570653	572008	-	CATTGATAGTAGTTGCGTAAAAAACAAAGCTCATAAAAGTTTCCGATATG	CTACCAAGGCAATTGCAGAATTTTTCACTAAGTTTGATGAATTAGTCGTA	CAATATTGTATAAATACATAGGAAAGTGGTTTGAAAATTGTGTGACATCA	CATTGATAGTAGTTGCGTAAAAAACAAAGCTCATAAAAGTTTCCGATATGCGGATCCCCGGGTTAATTAA	CTACCAAGGCAATTGCAGAATTTTTCACTAAGTTTGATGAATTAGTCGTACGGATCCCCGGGTTAATTAA	CAATATTGTATAAATACATAGGAAAGTGGTTTGAAAATTGTGTGACATCAGAATTCGAGCTCGTTTAAAC	1	YBR178W	1	YBR178W	0
YBR178W	YBR178W	2	571917	572290	+	ACTCGTCAAAATCAACTTGCTCCTTGTTGTCTTTTAAATGGAGTTTAATG	GGTTTTGCAAATCATTAAGCAGATACACAAGGGTCCTTTTAATGTTTATG	TTATTTTATTCCAAGCAGGTCCATTTTTTTTTTCACTTTGCACGAAATTA	ACTCGTCAAAATCAACTTGCTCCTTGTTGTCTTTTAAATGGAGTTTAATGCGGATCCCCGGGTTAATTAA	GGTTTTGCAAATCATTAAGCAGATACACAAGGGTCCTTTTAATGTTTATGCGGATCCCCGGGTTAATTAA	TTATTTTATTCCAAGCAGGTCCATTTTTTTTTTCACTTTGCACGAAATTAGAATTCGAGCTCGTTTAAAC	1	YBR177C	1	YBR177C	0
YBR179C	FZO1	2	572392	574959	-	ATTATCTGATATCACGGATAGAGGCAAAACGGTAGGCTCATTTAGCGATG	GAACCGTGGCTCAAAAATTGATGGTGGAAGAAATAAATTTAGACATCGAT	CATTATGTATATTGATTTGAAAAGACCTCATATATTTACAAGAATATCTA	ATTATCTGATATCACGGATAGAGGCAAAACGGTAGGCTCATTTAGCGATGCGGATCCCCGGGTTAATTAA	GAACCGTGGCTCAAAAATTGATGGTGGAAGAAATAAATTTAGACATCGATCGGATCCCCGGGTTAATTAA	CATTATGTATATTGATTTGAAAAGACCTCATATATTTACAAGAATATCTAGAATTCGAGCTCGTTTAAAC	0		0		0
YBR180W	DTR1	2	575583	577301	+	GTAATTTTTCAAAAAAGAGTTTCAAGAGCTGAGAAAGAATTAAGGTAATG	GTATATTATATCTTCTCATTTTTCAAAGAAAATATACTGCCAAAGAATTT	AATAAAATTCTAAAAGTTAAATTTTATAGCTAAACATAAACTATTTCTTA	GTAATTTTTCAAAAAAGAGTTTCAAGAGCTGAGAAAGAATTAAGGTAATGCGGATCCCCGGGTTAATTAA	GTATATTATATCTTCTCATTTTTCAAAGAAAATATACTGCCAAAGAATTTCGGATCCCCGGGTTAATTAA	AATAAAATTCTAAAAGTTAAATTTTATAGCTAAACATAAACTATTTCTTAGAATTCGAGCTCGTTTAAAC	0		0		0
YBR181C	RPS6B,RPS102,RPS101,LPG18	2	577554	578615	-	AAGTCATTAATTGAAACTATCCAGTGTGAATAGACGACTGAGCCATCATG	AGGCTGAAAAGGCCGAAATCAGAAAGAGAAGAGCTTCTTCTTTGAAGGCT	ATATCTAAAAGGAAAAAGTATAAAAATTATGCAGGTCCAAGACATACTTA	AAGTCATTAATTGAAACTATCCAGTGTGAATAGACGACTGAGCCATCATGCGGATCCCCGGGTTAATTAA	AGGCTGAAAAGGCCGAAATCAGAAAGAGAAGAGCTTCTTCTTTGAAGGCTCGGATCCCCGGGTTAATTAA	ATATCTAAAAGGAAAAAGTATAAAAATTATGCAGGTCCAAGACATACTTAGAATTCGAGCTCGTTTAAAC	0		0		0
YBR182C	SMP1	2	579347	580705	-	AGCTCTAGATAAGCAAACACAATTATTTTCAAAAAAATTTCTGCTAAATG	CGGTAGCTAGTTCAACTTTGAAATCCACGAGTTCGACAAACTCTCCAGAT	TTAGGCGAATGCTTTCTTGTAGTAAAAAGTAGCTAGAAAGCAATTCATTA	AGCTCTAGATAAGCAAACACAATTATTTTCAAAAAAATTTCTGCTAAATGCGGATCCCCGGGTTAATTAA	CGGTAGCTAGTTCAACTTTGAAATCCACGAGTTCGACAAACTCTCCAGATCGGATCCCCGGGTTAATTAA	TTAGGCGAATGCTTTCTTGTAGTAAAAAGTAGCTAGAAAGCAATTCATTAGAATTCGAGCTCGTTTAAAC	0		0		0
YBR182C-A	YBR182C-A	2	581202	581397	-	AGGTTAATGGTTGGCGATACTAACTAAAAAGAATTTGTAGAAATGCCATG	AGCTTGCTCTTAAGCTGTCAAAGAAAACTAGTGGCACTCACACTACGCAC	AATTTACGTAAGCGTTAATGGAAAACAATAACTATGTGGTGTAAAAGCTA	AGGTTAATGGTTGGCGATACTAACTAAAAAGAATTTGTAGAAATGCCATGCGGATCCCCGGGTTAATTAA	AGCTTGCTCTTAAGCTGTCAAAGAAAACTAGTGGCACTCACACTACGCACCGGATCCCCGGGTTAATTAA	AATTTACGTAAGCGTTAATGGAAAACAATAACTATGTGGTGTAAAAGCTAGAATTCGAGCTCGTTTAAAC	0		0		0
YBR183W	YPC1	2	581957	582907	+	ATTTGTAAATAAAAGCAGAAATCTTTATTTAAGAAAATAGAAGATTGATG	TATTTGGCCCATACGTAGAAGATCAATCAATTGAAGTTAAAAAGGAGAAG	AAAATAAATATGTCTATACATTATGAATATATATTATGCTATAATTATTA	ATTTGTAAATAAAAGCAGAAATCTTTATTTAAGAAAATAGAAGATTGATGCGGATCCCCGGGTTAATTAA	TATTTGGCCCATACGTAGAAGATCAATCAATTGAAGTTAAAAAGGAGAAGCGGATCCCCGGGTTAATTAA	AAAATAAATATGTCTATACATTATGAATATATATTATGCTATAATTATTAGAATTCGAGCTCGTTTAAAC	0		0		0
YBR184W	YBR184W	2	583205	584775	+	AATTGTTGTAACACAAATACTAAGAAATTTGTTAGCTAATTCGGGACATG	ATGACGATTCAACGGAAAGATGGGTTAGAATGGGAGAGTTAATGCACTAT	TTTATTAAATAGTTTTTCATGAAAAAAGTTATTGAAGCATCTCCCTTTCA	AATTGTTGTAACACAAATACTAAGAAATTTGTTAGCTAATTCGGGACATGCGGATCCCCGGGTTAATTAA	ATGACGATTCAACGGAAAGATGGGTTAGAATGGGAGAGTTAATGCACTATCGGATCCCCGGGTTAATTAA	TTTATTAAATAGTTTTTCATGAAAAAAGTTATTGAAGCATCTCCCTTTCAGAATTCGAGCTCGTTTAAAC	0		0		0
YBR185C	MBA1	2	584964	585800	-	AAATTTCCATCAGAAAGCAAGCCTATCCATTCAGCTAAGCTTATGAGATG	CCATACACAGAATGAAAGTTAACGGTGATATATATCGTTTACCTCCAAGC	CTATTTACAGATGTTCCAAAACCTTTCGCATTTATATACATATTGCCTTA	AAATTTCCATCAGAAAGCAAGCCTATCCATTCAGCTAAGCTTATGAGATGCGGATCCCCGGGTTAATTAA	CCATACACAGAATGAAAGTTAACGGTGATATATATCGTTTACCTCCAAGCCGGATCCCCGGGTTAATTAA	CTATTTACAGATGTTCCAAAACCTTTCGCATTTATATACATATTGCCTTAGAATTCGAGCTCGTTTAAAC	0		0		0
YBR186W	PCH2	2	586394	588201	+	TTTCATAAAAATATTCTGATCTCAAACTGAAGACATAAAATAAGGATATG	TTGTTCTGGCATTAGCTATGTCAGCGCGGAAGCTGAGCGCAGCGCGGAAG	AGTATGAGACAAAAGAAAGAAGCGAAAAAAAGGAAAAAGCTCCTCCATCA	TTTCATAAAAATATTCTGATCTCAAACTGAAGACATAAAATAAGGATATGCGGATCCCCGGGTTAATTAA	TTGTTCTGGCATTAGCTATGTCAGCGCGGAAGCTGAGCGCAGCGCGGAAGCGGATCCCCGGGTTAATTAA	AGTATGAGACAAAAGAAAGAAGCGAAAAAAAGGAAAAAGCTCCTCCATCAGAATTCGAGCTCGTTTAAAC	0		0		0
YBR187W	GDT1	2	588475	589317	+	TTAGGTTCTACAAAGCAAGATACAAATACGAGGCCATCGAGTATTCAATG	TCTTCATTTTCGCCTTGATGTATATATATCAAGCATTCACAACTCAGGAT	GAAGAGAAAAAAGAGAGAATCCAAGAAGAATACGGTTACAAACCATCTCA	TTAGGTTCTACAAAGCAAGATACAAATACGAGGCCATCGAGTATTCAATGCGGATCCCCGGGTTAATTAA	TCTTCATTTTCGCCTTGATGTATATATATCAAGCATTCACAACTCAGGATCGGATCCCCGGGTTAATTAA	GAAGAGAAAAAAGAGAGAATCCAAGAAGAATACGGTTACAAACCATCTCAGAATTCGAGCTCGTTTAAAC	0		0		0
YBR188C	NTC20	2	589526	589948	-	TCTACTTTTTTACGACTTACTTGTTGCGACTACTTTTTACAACCAGTATG	TAAGGAAAAGGGTATTACAGGAACCCGACCGTGACAATGATGATAGCGGC	GCCAACCCAATGAAATCTTGCGCACGCAATTGGTTGTAATTATCCGATCA	TCTACTTTTTTACGACTTACTTGTTGCGACTACTTTTTACAACCAGTATGCGGATCCCCGGGTTAATTAA	TAAGGAAAAGGGTATTACAGGAACCCGACCGTGACAATGATGATAGCGGCCGGATCCCCGGGTTAATTAA	GCCAACCCAATGAAATCTTGCGCACGCAATTGGTTGTAATTATCCGATCAGAATTCGAGCTCGTTTAAAC	0		0		0
YBR189W	RPS9B,SUP46,RPS13A	2	590349	591349	+	TGCATAGACAAGAAAGAAAGCAACAAGACAACTAAGACTAAGCAACAATG	GAAAGGCTGAAGCTTCCGGTGAAGCTGCTGAAGAAGCCGAAGACGAAGAA	TGAAAAGTTATAAAATTTATTATACAGTTATGAAATCAGCGAATTATTTA	TGCATAGACAAGAAAGAAAGCAACAAGACAACTAAGACTAAGCAACAATGCGGATCCCCGGGTTAATTAA	GAAAGGCTGAAGCTTCCGGTGAAGCTGCTGAAGAAGCCGAAGACGAAGAACGGATCCCCGGGTTAATTAA	TGAAAAGTTATAAAATTTATTATACAGTTATGAAATCAGCGAATTATTTAGAATTCGAGCTCGTTTAAAC	0		0		0
YBR190W	YBR190W	2	591806	592117	+	ACCTGTACATCTCCACCATCACCACACCTTTTTTACTGGAGGCAAGGATG	TTGAACTTTGGAATAAGATAACCAAGACAAAAATAACTAGCAACAATGGG	CATGATTCGTTCGTGCTGTAGATTCATAGGATTAAATGACATACGATTTA	ACCTGTACATCTCCACCATCACCACACCTTTTTTACTGGAGGCAAGGATGCGGATCCCCGGGTTAATTAA	TTGAACTTTGGAATAAGATAACCAAGACAAAAATAACTAGCAACAATGGGCGGATCCCCGGGTTAATTAA	CATGATTCGTTCGTGCTGTAGATTCATAGGATTAAATGACATACGATTTAGAATTCGAGCTCGTTTAAAC	1	YBR191W	1	YBR191W	0
YBR191W	RPL21A,URP1	2	592110	592980	+	GATTGAACTTTGGAATAAGATAACCAAGACAAAAATAACTAGCAACAATG	AAGGTAACGTTCCTCAAACTTTGGCCCCAGTTCCATACGAAACTTTCATC	CCTAAAACCTGAAAATCTTTTTCGATACAAAACCAGCATCGGGTAAATTA	GATTGAACTTTGGAATAAGATAACCAAGACAAAAATAACTAGCAACAATGCGGATCCCCGGGTTAATTAA	AAGGTAACGTTCCTCAAACTTTGGCCCCAGTTCCATACGAAACTTTCATCCGGATCCCCGGGTTAATTAA	CCTAAAACCTGAAAATCTTTTTCGATACAAAACCAGCATCGGGTAAATTAGAATTCGAGCTCGTTTAAAC	1	YBR190W	1	YBR190W	0
YBR191W-A	YBR191W-A	2	592989	593063	+	CAAACTTTGGCCCCAGTTCCATACGAAACTTTCATCTAATTTACCCGATG	GATTTTCAGGTTTTAGGTTTTATTTTTTGTCTATTTTTAAATATATAATA	TAATCTAAATGTACAAATTATGGATATTAGACACAATTTATTTTTTATTA	CAAACTTTGGCCCCAGTTCCATACGAAACTTTCATCTAATTTACCCGATGCGGATCCCCGGGTTAATTAA	GATTTTCAGGTTTTAGGTTTTATTTTTTGTCTATTTTTAAATATATAATACGGATCCCCGGGTTAATTAA	TAATCTAAATGTACAAATTATGGATATTAGACACAATTTATTTTTTATTAGAATTCGAGCTCGTTTAAAC	0		0		0
YBR192W	RIM2,PYT1	2	593492	594625	+	ACATAGTTGACCATTCTCATATCCCATAATTTTTCAAGGAGATAAAGATG	ACAGTATAATTATGTTTGGTACATGGGAAATTGTTATAAGGCTACTATCG	GTATGTCTTGGCCCTAAAGTGAATTTAGAGTTTTTTAGATTTCAAGGCTA	ACATAGTTGACCATTCTCATATCCCATAATTTTTCAAGGAGATAAAGATGCGGATCCCCGGGTTAATTAA	ACAGTATAATTATGTTTGGTACATGGGAAATTGTTATAAGGCTACTATCGCGGATCCCCGGGTTAATTAA	GTATGTCTTGGCCCTAAAGTGAATTTAGAGTTTTTTAGATTTCAAGGCTAGAATTCGAGCTCGTTTAAAC	0		0		0
YBR193C	MED8	2	594922	595593	-	AACCCCGAGCAAGAAGAACAAAAGAAAAACATAAAGCAACGTGGAATATG	CAGGGGAAAAGCCCTTTATTACGGGATCTACTCCAACATCATCTAGTAAT	CTAGTAACAATAAAATGTTTTAAAATATCAGTAGCGTGAAGTAAAATTCA	AACCCCGAGCAAGAAGAACAAAAGAAAAACATAAAGCAACGTGGAATATGCGGATCCCCGGGTTAATTAA	CAGGGGAAAAGCCCTTTATTACGGGATCTACTCCAACATCATCTAGTAATCGGATCCCCGGGTTAATTAA	CTAGTAACAATAAAATGTTTTAAAATATCAGTAGCGTGAAGTAAAATTCAGAATTCGAGCTCGTTTAAAC	0		0		0
YBR194W	SOY1	2	595878	596249	+	TTTAGTTCTCGCATTCCATCATTTTATACTATATACGTTTGAGCTTAATG	CTGAAGTTCAAGCCAGACTAGGAAACCTCGAGAATATCAAAATACCAAAG	TATTGTATTTCGAAGAAAGAGGTTGCTCATTTATTACCTTTGAACTTTCA	TTTAGTTCTCGCATTCCATCATTTTATACTATATACGTTTGAGCTTAATGCGGATCCCCGGGTTAATTAA	CTGAAGTTCAAGCCAGACTAGGAAACCTCGAGAATATCAAAATACCAAAGCGGATCCCCGGGTTAATTAA	TATTGTATTTCGAAGAAAGAGGTTGCTCATTTATTACCTTTGAACTTTCAGAATTCGAGCTCGTTTAAAC	0		0		0
YBR195C	MSI1,CAC3	2	596454	597722	-	TATCAGGTCCTATTTCTGACAAACGATATACAAATTTAGTTTCAAAGATG	ATAATTCAGTTCACATATGGAAACCTGCAGGAAACCTTGTTGGACATTCG	ATAGGGACAGGAGCCATTAGCATGCCTGGCTTCAAGGAACGTTTAGGTCA	TATCAGGTCCTATTTCTGACAAACGATATACAAATTTAGTTTCAAAGATGCGGATCCCCGGGTTAATTAA	ATAATTCAGTTCACATATGGAAACCTGCAGGAAACCTTGTTGGACATTCGCGGATCCCCGGGTTAATTAA	ATAGGGACAGGAGCCATTAGCATGCCTGGCTTCAAGGAACGTTTAGGTCAGAATTCGAGCTCGTTTAAAC	0		0		0
YBR196C	PGI1,CDC30	2	598076	599740	-	CCTCTAGTCTTGCAAAATCGATTTAGAATCAAGATACCAGCCTAAAAATG	CCCACGATGCTTCTACCAACGGTTTAATCAATCAATTCAAGGAATGGATG	TAATATAGCTTTAATGTTCTTTAGGTATATATTTAAGAGCGATTTGTTCA	CCTCTAGTCTTGCAAAATCGATTTAGAATCAAGATACCAGCCTAAAAATGCGGATCCCCGGGTTAATTAA	CCCACGATGCTTCTACCAACGGTTTAATCAATCAATTCAAGGAATGGATGCGGATCCCCGGGTTAATTAA	TAATATAGCTTTAATGTTCTTTAGGTATATATTTAAGAGCGATTTGTTCAGAATTCGAGCTCGTTTAAAC	0		0		0
YBR196C-A	YBR196C-A	2	599864	600013	-	TGGTAATTTTTTGGGTTTGCAATCATCACCATCTGCACGTTGTTATAATG	TTCCCTATTTGTTTCGTCCCATTTTTCCTTTTCTCATTGTTCTCATATCT	TAAAATATTAAGTAAAAGAAAGCATTGATTATGAAGAAAGGACCTTTTTA	TGGTAATTTTTTGGGTTTGCAATCATCACCATCTGCACGTTGTTATAATGCGGATCCCCGGGTTAATTAA	TTCCCTATTTGTTTCGTCCCATTTTTCCTTTTCTCATTGTTCTCATATCTCGGATCCCCGGGTTAATTAA	TAAAATATTAAGTAAAAGAAAGCATTGATTATGAAGAAAGGACCTTTTTAGAATTCGAGCTCGTTTAAAC	0		0		0
YBR196C-B	YBR196C-B	2	600364	600469	-	CATTTCCTGGCGGCTATTTGCATCGCTATGTAAGTGGCAATGTTTGGATG	CCAAGACTATTTTATTCTCAGCACTTGTTCTACGTGGGGTTAGAGGCGAG	ATGTCCGATGGCAAAATTCTCTTTGCTTTCGCAGCGGGGCCGAAGTCTTA	CATTTCCTGGCGGCTATTTGCATCGCTATGTAAGTGGCAATGTTTGGATGCGGATCCCCGGGTTAATTAA	CCAAGACTATTTTATTCTCAGCACTTGTTCTACGTGGGGTTAGAGGCGAGCGGATCCCCGGGTTAATTAA	ATGTCCGATGGCAAAATTCTCTTTGCTTTCGCAGCGGGGCCGAAGTCTTAGAATTCGAGCTCGTTTAAAC	0		0		0
YBR197C	YBR197C	2	601042	601695	-	GAGAAATAAGATGAAATGTATGTTGCTGGCACGAACGAAGACAAATAATG	AGAAGTACGTGAGCCAAGTTGTCGATACTATTAAAGATGTTCACCGATGC	GACGGGACTTTTAGCATCCTCTAAATATTTTCAACCCATACATGTCATCA	GAGAAATAAGATGAAATGTATGTTGCTGGCACGAACGAAGACAAATAATGCGGATCCCCGGGTTAATTAA	AGAAGTACGTGAGCCAAGTTGTCGATACTATTAAAGATGTTCACCGATGCCGGATCCCCGGGTTAATTAA	GACGGGACTTTTAGCATCCTCTAAATATTTTCAACCCATACATGTCATCAGAATTCGAGCTCGTTTAAAC	0		0		0
YBR198C	TAF5,TAF90	2	601966	604362	-	AGATACGAGAAATTCCGGGTTCAAGTTGAGATACTTGAAAAATAAGAATG	TCAAGTTCAGCAGAAGCAATTTAGCCCTTGCAGGAGGTGCTTTCAGGCCA	ATACTTATTACATATCACTTCCATGCTGTTATTTTTTTCAGTGTGAATTA	AGATACGAGAAATTCCGGGTTCAAGTTGAGATACTTGAAAAATAAGAATGCGGATCCCCGGGTTAATTAA	TCAAGTTCAGCAGAAGCAATTTAGCCCTTGCAGGAGGTGCTTTCAGGCCACGGATCCCCGGGTTAATTAA	ATACTTATTACATATCACTTCCATGCTGTTATTTTTTTCAGTGTGAATTAGAATTCGAGCTCGTTTAAAC	0		0		0
YBR199W	KTR4	2	604748	606142	+	ACACAATTTTTAGTTTAGACCCAACAAGGTGAACCATACGAACTGACATG	AGGCAACCTGGATAAGACACTCTATGTCTGAGGAAGAGTTAGAAATGTAT	GATGCCGTTCTCGAAAGCAGCGGCACAAATTCTCAAAGCTAATGTCTTCA	ACACAATTTTTAGTTTAGACCCAACAAGGTGAACCATACGAACTGACATGCGGATCCCCGGGTTAATTAA	AGGCAACCTGGATAAGACACTCTATGTCTGAGGAAGAGTTAGAAATGTATCGGATCCCCGGGTTAATTAA	GATGCCGTTCTCGAAAGCAGCGGCACAAATTCTCAAAGCTAATGTCTTCAGAATTCGAGCTCGTTTAAAC	0		0		0
YBR200W	BEM1,SRO1	2	606711	608366	+	ACGTTGAAAGCACTGTGTGAAAAGAAATTGTCAAGAAAGCCATATAAATG	AAGTCAGTAACATAATCCAAACCAAACTGAAAATTTCCGTTCACGATATT	CATCTGCCAAGTAAAGAAGAAAAATGCTTCGTCTTCTAACACTAGATTCA	ACGTTGAAAGCACTGTGTGAAAAGAAATTGTCAAGAAAGCCATATAAATGCGGATCCCCGGGTTAATTAA	AAGTCAGTAACATAATCCAAACCAAACTGAAAATTTCCGTTCACGATATTCGGATCCCCGGGTTAATTAA	CATCTGCCAAGTAAAGAAGAAAAATGCTTCGTCTTCTAACACTAGATTCAGAATTCGAGCTCGTTTAAAC	0		0		0
YBR200W-A	YBR200W-A	2	608822	608986	+	TTCAGAAGAGACTACAAGAAAAATTCTGAACATATTTATTCTTAACTATG	ACCGCAGCCCAAAGATACTTTCTCTTTATTTTATTAGCGATAGGACAGGC	TACAATAATTTCAATTACTTTCTGCTTGATTAATAGTGATTATCATTTTA	TTCAGAAGAGACTACAAGAAAAATTCTGAACATATTTATTCTTAACTATGCGGATCCCCGGGTTAATTAA	ACCGCAGCCCAAAGATACTTTCTCTTTATTTTATTAGCGATAGGACAGGCCGGATCCCCGGGTTAATTAA	TACAATAATTTCAATTACTTTCTGCTTGATTAATAGTGATTATCATTTTAGAATTCGAGCTCGTTTAAAC	0		0		0
YBR201W	DER1	2	609415	610050	+	AGCAGAGATTTCGTCACCAACAGAAGAAAAGCTAAAGCCCAAGCAATATG	TCGATTTGTGTAAATCTCCGTACGACTGGTTCCGCAACACTGAAACACCC	CGTTCACTTTTGTTATTGGTTTTTGGTAAATAAAAACGGCCTTTCCTTTA	AGCAGAGATTTCGTCACCAACAGAAGAAAAGCTAAAGCCCAAGCAATATGCGGATCCCCGGGTTAATTAA	TCGATTTGTGTAAATCTCCGTACGACTGGTTCCGCAACACTGAAACACCCCGGATCCCCGGGTTAATTAA	CGTTCACTTTTGTTATTGGTTTTTGGTAAATAAAAACGGCCTTTCCTTTAGAATTCGAGCTCGTTTAAAC	0		0		0
YBR201C-A	YBR201C-A	2	610332	610535	-	TTTTTTTATAATATATAGGAAATATCACAAAAGATCGAGGACTAACAATG	CACACTACTACAAGGACGAATTTTGTTCTCAACGATCATACACCAGGTTT	GTCTCGGTAATTTTCTCCCTAATGATAACCCATATTTTCGAAAGACTCTA	TTTTTTTATAATATATAGGAAATATCACAAAAGATCGAGGACTAACAATGCGGATCCCCGGGTTAATTAA	CACACTACTACAAGGACGAATTTTGTTCTCAACGATCATACACCAGGTTTCGGATCCCCGGGTTAATTAA	GTCTCGGTAATTTTCTCCCTAATGATAACCCATATTTTCGAAAGACTCTAGAATTCGAGCTCGTTTAAAC	0		0		0
YBR202W	MCM7,CDC47	2	611611	614148	+	ATTAGCTTGAATCTTGCAGGAAGAACTCAATACAGATAGACCAGATTATG	CTTCCGCTAATGTGAGCGCCCAAGATTCTGATATCGATCTACAAGACGCT	AAAAAGAATAAAGAATGAAGGCCCTGTTGCTTTTTTTTTTAGAACTTTCA	ATTAGCTTGAATCTTGCAGGAAGAACTCAATACAGATAGACCAGATTATGCGGATCCCCGGGTTAATTAA	CTTCCGCTAATGTGAGCGCCCAAGATTCTGATATCGATCTACAAGACGCTCGGATCCCCGGGTTAATTAA	AAAAAGAATAAAGAATGAAGGCCCTGTTGCTTTTTTTTTTAGAACTTTCAGAATTCGAGCTCGTTTAAAC	0		0		0
YBR203W	COS111	2	615003	617777	+	AAAAGGAGAAAGAAAAAAAGGTACGCTAAACAAGGTCGAGTGTATTGATG	ATCTAAGGAGAAATGTTGGCGAAAATAACTACTATGCTGAAAGCATCATA	TGGCCAAATAAATTAACAGAACGTATGCTGTTAAAAGAGAGCAGTCGTTA	AAAAGGAGAAAGAAAAAAAGGTACGCTAAACAAGGTCGAGTGTATTGATGCGGATCCCCGGGTTAATTAA	ATCTAAGGAGAAATGTTGGCGAAAATAACTACTATGCTGAAAGCATCATACGGATCCCCGGGTTAATTAA	TGGCCAAATAAATTAACAGAACGTATGCTGTTAAAAGAGAGCAGTCGTTAGAATTCGAGCTCGTTTAAAC	0		0		0
YBR204C	YBR204C	2	618089	619216	-	CTCAACGTTAGAAGAAAGCTTTAAACAGAGAACTTTTTCTCTTGGTAATG	AATTGGTGTGTGAAAACTTTCAACGAGAGGTGATTGATAATTCCAAATTG	AGTGTGCACGAAAATCTAGTTACGCAATGTGAAATCTAGAAAACCTTCTA	CTCAACGTTAGAAGAAAGCTTTAAACAGAGAACTTTTTCTCTTGGTAATGCGGATCCCCGGGTTAATTAA	AATTGGTGTGTGAAAACTTTCAACGAGAGGTGATTGATAATTCCAAATTGCGGATCCCCGGGTTAATTAA	AGTGTGCACGAAAATCTAGTTACGCAATGTGAAATCTAGAAAACCTTCTAGAATTCGAGCTCGTTTAAAC	0		0		0
YBR205W	KTR3	2	619457	620671	+	AGGCCTCGTCTGCGGACAACAACACTATCAATATCCAGCGTGCCATTATG	GTACTAGAAAGTACTTTTCAGCAGGAAATTACAAGCTTCCACCAGGAATT	TTTTAGCACCTGTTTTGACGGAGCAGGCGCTATTTGTAGTTTGGTTTTTA	AGGCCTCGTCTGCGGACAACAACACTATCAATATCCAGCGTGCCATTATGCGGATCCCCGGGTTAATTAA	GTACTAGAAAGTACTTTTCAGCAGGAAATTACAAGCTTCCACCAGGAATTCGGATCCCCGGGTTAATTAA	TTTTAGCACCTGTTTTGACGGAGCAGGCGCTATTTGTAGTTTGGTTTTTAGAATTCGAGCTCGTTTAAAC	1	YBR206W	1	YBR206W	0
YBR206W	YBR206W	2	620436	620759	+	TGATTACTTAGACAGTTCTGGTGGATTCTTCTACGAAAGATGGGGGGATG	CAGGTGCTAAAACGTCAACATGTATCTATCTATATACACATAATTCAATG	ACCCATTTTTGAACCCAAGAAGGCACTAGAATAAAGTGAGGTGGCTACTA	TGATTACTTAGACAGTTCTGGTGGATTCTTCTACGAAAGATGGGGGGATGCGGATCCCCGGGTTAATTAA	CAGGTGCTAAAACGTCAACATGTATCTATCTATATACACATAATTCAATGCGGATCCCCGGGTTAATTAA	ACCCATTTTTGAACCCAAGAAGGCACTAGAATAAAGTGAGGTGGCTACTAGAATTCGAGCTCGTTTAAAC	1	YBR205W	1	YBR205W	0
YBR207W	FTH1	2	620981	622378	+	AACTCTAAGAATAGAGAACTAGAGTGGTATTCATATTTCTAGTCACCATG	CCAAAGATAGTTCTGTGCCCCTAATAATTGATAGCAGTGGTTCAGCGAAT	AATGTATGAAAAGAAGCTTAAAATTATTACGTGTGTTTGTTATGTTCTCA	AACTCTAAGAATAGAGAACTAGAGTGGTATTCATATTTCTAGTCACCATGCGGATCCCCGGGTTAATTAA	CCAAAGATAGTTCTGTGCCCCTAATAATTGATAGCAGTGGTTCAGCGAATCGGATCCCCGGGTTAATTAA	AATGTATGAAAAGAAGCTTAAAATTATTACGTGTGTTTGTTATGTTCTCAGAATTCGAGCTCGTTTAAAC	0		0		0
YBR208C	DUR1,2,DUR80	2	622538	628045	-	GAAATATCTTTTTTATAGTCACAATAAATTTCAGTTTTGATTAAAAAATG	GTGATATGGTTGATTCTGGTGACATAGTGGCCGTCATAGAGACATTCGCA	AGACTAAATGAGTGCTCCTTTGATTTTAGATGCCAACAAAAGGTAATTCA	GAAATATCTTTTTTATAGTCACAATAAATTTCAGTTTTGATTAAAAAATGCGGATCCCCGGGTTAATTAA	GTGATATGGTTGATTCTGGTGACATAGTGGCCGTCATAGAGACATTCGCACGGATCCCCGGGTTAATTAA	AGACTAAATGAGTGCTCCTTTGATTTTAGATGCCAACAAAAGGTAATTCAGAATTCGAGCTCGTTTAAAC	0		0		0
YBR209W	YBR209W	2	628418	628735	+	CAATGGCTTGCGCTAACTGCGAACAGAGTGCCCTATGAAATAGGGGAATG	TTAAAAAGGGTATTGCCAATACACATAGTAGCCTTATCTGCAGCAAGCCA	AACATGTTCTTTGCTTTTTTTCCCCAACGACGTCGAACACATTAGTCCTA	CAATGGCTTGCGCTAACTGCGAACAGAGTGCCCTATGAAATAGGGGAATGCGGATCCCCGGGTTAATTAA	TTAAAAAGGGTATTGCCAATACACATAGTAGCCTTATCTGCAGCAAGCCACGGATCCCCGGGTTAATTAA	AACATGTTCTTTGCTTTTTTTCCCCAACGACGTCGAACACATTAGTCCTAGAATTCGAGCTCGTTTAAAC	0		0		0
YBR210W	ERV15	2	630989	631417	+	GATAAAACTAACTGCAGGCACCAAGAAGTTCGAAGCCAAGAGTAAAGATG	TCTACAGAATGGTCACAGCGTTACTTGAAAATGATGCAAATTTGATAAGC	ACTTCATAGATATGCACAAATCTCTCTTTTTTTTTCTGTTGTCGCTATTA	GATAAAACTAACTGCAGGCACCAAGAAGTTCGAAGCCAAGAGTAAAGATGCGGATCCCCGGGTTAATTAA	TCTACAGAATGGTCACAGCGTTACTTGAAAATGATGCAAATTTGATAAGCCGGATCCCCGGGTTAATTAA	ACTTCATAGATATGCACAAATCTCTCTTTTTTTTTCTGTTGTCGCTATTAGAATTCGAGCTCGTTTAAAC	0		0		0
YBR211C	AME1,ARP100	2	631564	632538	-	TGTATTGTCTTGACTATTTGCGTGTTCATTTAAAGAAAAACCTCAGTATG	AAATAAATAAAATTAATGAAAATCTTTCTAACGAATTACAACCAAGTCTA	AATACATATATACATATATATATATATACATCTTTTGAACCAATTCCCTA	TGTATTGTCTTGACTATTTGCGTGTTCATTTAAAGAAAAACCTCAGTATGCGGATCCCCGGGTTAATTAA	AAATAAATAAAATTAATGAAAATCTTTCTAACGAATTACAACCAAGTCTACGGATCCCCGGGTTAATTAA	AATACATATATACATATATATATATATACATCTTTTGAACCAATTCCCTAGAATTCGAGCTCGTTTAAAC	0		0		0
YBR212W	NGR1,RBP1	2	633291	635303	+	TTTTTCATATCCTTCGCCATCGATTTTTGCCTGAAAAATTTACACAAATG	AGCATCCTAATAGGAACAATGTTCCGCCAATTCATCCTTCTCTTCTACAT	ATAAAACTGCGGACAAGATTGAAATTTTCTTTTTTTGTCTTTTGTAATCA	TTTTTCATATCCTTCGCCATCGATTTTTGCCTGAAAAATTTACACAAATGCGGATCCCCGGGTTAATTAA	AGCATCCTAATAGGAACAATGTTCCGCCAATTCATCCTTCTCTTCTACATCGGATCCCCGGGTTAATTAA	ATAAAACTGCGGACAAGATTGAAATTTTCTTTTTTTGTCTTTTGTAATCAGAATTCGAGCTCGTTTAAAC	0		0		0
YBR213W	MET8	2	635763	636587	+	TTGTTCATGAAGTGTGCAAAATAAGAGAGTGTATAATAGGATAAAAAATG	CCTTGCAGTTCCCTCCCAGAGAACGGTTGCTTAGCGAGTACTGCTCGTCT	CTACACAATAGAAAGGACGCGCCCCTTAAAAGAGGAGGCCCTGTCGCTCA	TTGTTCATGAAGTGTGCAAAATAAGAGAGTGTATAATAGGATAAAAAATGCGGATCCCCGGGTTAATTAA	CCTTGCAGTTCCCTCCCAGAGAACGGTTGCTTAGCGAGTACTGCTCGTCTCGGATCCCCGGGTTAATTAA	CTACACAATAGAAAGGACGCGCCCCTTAAAAGAGGAGGCCCTGTCGCTCAGAATTCGAGCTCGTTTAAAC	0		0		0
YBR214W	SDS24	2	636810	638393	+	AACTATAAACACTTATAGAACAATTACCGTTTCTTCCTTCACACAACATG	AAGAAGTGGATCCGCAATCCGCAAGAAGACAGAGAGGCAGTATCGCCATG	TTTTTTGAGGGAGAGGGAAACAGCGGGAAAAGACAACGTTGCAAGCCTCA	AACTATAAACACTTATAGAACAATTACCGTTTCTTCCTTCACACAACATGCGGATCCCCGGGTTAATTAA	AAGAAGTGGATCCGCAATCCGCAAGAAGACAGAGAGGCAGTATCGCCATGCGGATCCCCGGGTTAATTAA	TTTTTTGAGGGAGAGGGAAACAGCGGGAAAAGACAACGTTGCAAGCCTCAGAATTCGAGCTCGTTTAAAC	0		0		0
YBR215W	HPC2	2	638752	640713	+	TTAAACGAACAGCATTAACCTCCACGACCATATTCAAACGATTGGAAATG	GTTTGGAGCGTGCAAATGGTACCATGAAAAGAGGTGGTGTTAAAAATAAA	CATTTTTTATGTCGTTCAGGGATTTTGGAAAATCTCTGACACAATGCTTA	TTAAACGAACAGCATTAACCTCCACGACCATATTCAAACGATTGGAAATGCGGATCCCCGGGTTAATTAA	GTTTGGAGCGTGCAAATGGTACCATGAAAAGAGGTGGTGTTAAAAATAAACGGATCCCCGGGTTAATTAA	CATTTTTTATGTCGTTCAGGGATTTTGGAAAATCTCTGACACAATGCTTAGAATTCGAGCTCGTTTAAAC	0		0		0
YBR216C	YBP1	2	640974	642998	-	TGAAAAAGAAAATCACCCTAGACATTCAATACGATACTCAGACACTAATG	AAATTGTGGATAAAAACGAATCTCTAAATGACTATTTTACTGGTATAAAA	TATGGCATGTTCAATATCTTGGTGGAAAAATGAAATAGATAAGAACTTCA	TGAAAAAGAAAATCACCCTAGACATTCAATACGATACTCAGACACTAATGCGGATCCCCGGGTTAATTAA	AAATTGTGGATAAAAACGAATCTCTAAATGACTATTTTACTGGTATAAAACGGATCCCCGGGTTAATTAA	TATGGCATGTTCAATATCTTGGTGGAAAAATGAAATAGATAAGAACTTCAGAATTCGAGCTCGTTTAAAC	0		0		0
YBR217W	ATG12,APG12	2	643230	643790	+	GTACATCCCTAACTGTATATTCTACAGTAGAGTGAACCAATGACAGTATG	AGACTAATGATGAGCTTATTGTAAGTTATTGTGCATCCGTAGCGTTTGGT	TGATCGACTGTAGGTTTTCTTCTTAGACCATTCCAGCGCCCGGGTATTTA	GTACATCCCTAACTGTATATTCTACAGTAGAGTGAACCAATGACAGTATGCGGATCCCCGGGTTAATTAA	AGACTAATGATGAGCTTATTGTAAGTTATTGTGCATCCGTAGCGTTTGGTCGGATCCCCGGGTTAATTAA	TGATCGACTGTAGGTTTTCTTCTTAGACCATTCCAGCGCCCGGGTATTTAGAATTCGAGCTCGTTTAAAC	0		0		0
YBR218C	PYC2	2	644105	647647	-	ACAGTTACTAGGAGAGAAAATAAGAGACATAGAGAACAAAATAAAATATG	ATTTGTTGGTTGTCCTAGAAGAAGAAACCCTACCCCCATCCCAAAAAAAG	ACAGCTAGTATTTTCAGATGTCATAAAATATAATTAACGAGTAAAAATTA	ACAGTTACTAGGAGAGAAAATAAGAGACATAGAGAACAAAATAAAATATGCGGATCCCCGGGTTAATTAA	ATTTGTTGGTTGTCCTAGAAGAAGAAACCCTACCCCCATCCCAAAAAAAGCGGATCCCCGGGTTAATTAA	ACAGCTAGTATTTTCAGATGTCATAAAATATAATTAACGAGTAAAAATTAGAATTCGAGCTCGTTTAAAC	0		0		0
YBR219C	YBR219C	2	647897	648701	-	CGGCCTTCCATACAAGAGTTGCAGACCCCGTGCTGGGTGGCACATATATG	TTACGTCTCGAGCTATTTATTATAAGAGTCAGAATTGGCGCAGGGAGTGT	AATCACAGAAACACAATAGGAAATAACCGATGGGGAGTACTTCTTACTTA	CGGCCTTCCATACAAGAGTTGCAGACCCCGTGCTGGGTGGCACATATATGCGGATCCCCGGGTTAATTAA	TTACGTCTCGAGCTATTTATTATAAGAGTCAGAATTGGCGCAGGGAGTGTCGGATCCCCGGGTTAATTAA	AATCACAGAAACACAATAGGAAATAACCGATGGGGAGTACTTCTTACTTAGAATTCGAGCTCGTTTAAAC	1	YBR220C	1	YBR220C	0
YBR220C	YBR220C	2	648393	650075	-	GGCAGTATAATATACCATAGTTATAGGGGGATAAAACAAAAGTAGGCATG	GGAAAATCCTCCATTTACAAAGTCTGCCAATCAGTTCCTGGAGATGTACG	AAAATTTTCTTGAACGTAATGTCGTACAATTCTTGTTTGAGGGGTCGTTA	GGCAGTATAATATACCATAGTTATAGGGGGATAAAACAAAAGTAGGCATGCGGATCCCCGGGTTAATTAA	GGAAAATCCTCCATTTACAAAGTCTGCCAATCAGTTCCTGGAGATGTACGCGGATCCCCGGGTTAATTAA	AAAATTTTCTTGAACGTAATGTCGTACAATTCTTGTTTGAGGGGTCGTTAGAATTCGAGCTCGTTTAAAC	1	YBR219C	1	YBR219C	0
YBR221C	PDB1	2	650551	651651	-	ATCGCAGTTTAGTAAGTTCTTTTACTTTTGCAATAATTTTGTTCAACATG	CTGATACTCCAACCATCGTTAAAGCTGTCAAAGAAGTCTTGTCAATTGAA	GTTCCCTATCTCCTTCTTTCTCTCCTTCCTATTCGATTGAAGTTTATTTA	ATCGCAGTTTAGTAAGTTCTTTTACTTTTGCAATAATTTTGTTCAACATGCGGATCCCCGGGTTAATTAA	CTGATACTCCAACCATCGTTAAAGCTGTCAAAGAAGTCTTGTCAATTGAACGGATCCCCGGGTTAATTAA	GTTCCCTATCTCCTTCTTTCTCTCCTTCCTATTCGATTGAAGTTTATTTAGAATTCGAGCTCGTTTAAAC	0		0		0
YBR221W-A	YBR221W-A	2	651936	652040	+	ACTTTTAATGACGGAGAACTTCTTAGTTGAAGACTCGTCTCTTTTGCATG	GAAAAAGAATCAGCTTAGGCATGATAAATACTGTGGTTTCATTAGATAGA	AAAGCTTCTATCTGGCACCCGTTTATATACGCCAATACTTATGTATTTTA	ACTTTTAATGACGGAGAACTTCTTAGTTGAAGACTCGTCTCTTTTGCATGCGGATCCCCGGGTTAATTAA	GAAAAAGAATCAGCTTAGGCATGATAAATACTGTGGTTTCATTAGATAGACGGATCCCCGGGTTAATTAA	AAAGCTTCTATCTGGCACCCGTTTATATACGCCAATACTTATGTATTTTAGAATTCGAGCTCGTTTAAAC	0		0		0
YBR222C	PCS60,FAT2	2	652118	653749	-	CCACTGTGCTGCAAGAGGTTAGACGCTTCACGCACATTTTTGCTACAATG	GAGTTATCGCAGAAACTTTTGCTAAGAGCAGCAGAAATAAGAGTAAGTTG	TGCCAGATAGAAGCTTTCAGAGAGCATAAAATTGTGCAGGATACTGCCTA	CCACTGTGCTGCAAGAGGTTAGACGCTTCACGCACATTTTTGCTACAATGCGGATCCCCGGGTTAATTAA	GAGTTATCGCAGAAACTTTTGCTAAGAGCAGCAGAAATAAGAGTAAGTTGCGGATCCCCGGGTTAATTAA	TGCCAGATAGAAGCTTTCAGAGAGCATAAAATTGTGCAGGATACTGCCTAGAATTCGAGCTCGTTTAAAC	0		0		0
YBR223C	TDP1	2	654061	655695	-	GTGAGCCCAGACAAGAATGATGATAATGTGTTTTCAACCGATTATTAATG	ACGACTTAGCTGAGGACGAGTGCTTTTGCCTTGCTCGTCATGAGAACGAC	CCCATATAGTGATGCCTAAGTGGACAGCAACATCGTGCTCTTACTTGTTA	GTGAGCCCAGACAAGAATGATGATAATGTGTTTTCAACCGATTATTAATGCGGATCCCCGGGTTAATTAA	ACGACTTAGCTGAGGACGAGTGCTTTTGCCTTGCTCGTCATGAGAACGACCGGATCCCCGGGTTAATTAA	CCCATATAGTGATGCCTAAGTGGACAGCAACATCGTGCTCTTACTTGTTAGAATTCGAGCTCGTTTAAAC	2	YBR223W-A;YBR224W	2	YBR223W-A;YBR224W	0
YBR223W-A	YBR223W-A	2	654119	654238	+	CATGACGAGCAAGGCAAAAGCACTCGTCCTCAGCTAAGTCGTATGGTATG	TAAAAGTACGGCACGTGACCTTCCTGGTATTTGCTAACCTGCGACTATGG	TGGGGCACCGTTTCAAGAAAACCACGCAATTATGAAGCAGGAGTGCTTTA	CATGACGAGCAAGGCAAAAGCACTCGTCCTCAGCTAAGTCGTATGGTATGCGGATCCCCGGGTTAATTAA	TAAAAGTACGGCACGTGACCTTCCTGGTATTTGCTAACCTGCGACTATGGCGGATCCCCGGGTTAATTAA	TGGGGCACCGTTTCAAGAAAACCACGCAATTATGAAGCAGGAGTGCTTTAGAATTCGAGCTCGTTTAAAC	1	YBR223C	1	YBR223C	0
YBR224W	YBR224W	2	655523	656038	+	TTGTTCCTATTCTCTCACTCAAATCTTGTTCCTGATTAGTCAAATCAATG	TCATTTATCCACTTTTTATAAACTGCTCAAGTAAATACAATGGGCTCCAA	TACTGGTTAACCCCCTATCATTCTTACTATCAATGTTTTTTGCTTCCTTA	TTGTTCCTATTCTCTCACTCAAATCTTGTTCCTGATTAGTCAAATCAATGCGGATCCCCGGGTTAATTAA	TCATTTATCCACTTTTTATAAACTGCTCAAGTAAATACAATGGGCTCCAACGGATCCCCGGGTTAATTAA	TACTGGTTAACCCCCTATCATTCTTACTATCAATGTTTTTTGCTTCCTTAGAATTCGAGCTCGTTTAAAC	2	YBR223C;YBR225W	2	YBR223C;YBR225W	0
YBR225W	YBR225W	2	656025	658727	+	TTTTCCCCTCATTTATCCACTTTTTATAAACTGCTCAAGTAAATACAATG	TTAGAACTTTGTATGTGGTGGCGCAAAAGCCAAAACTGCCATATACCAAA	AAGTAATTCTTGAACAATTTAAAAAAAAAATTGGTACGGCGGCACAATTA	TTTTCCCCTCATTTATCCACTTTTTATAAACTGCTCAAGTAAATACAATGCGGATCCCCGGGTTAATTAA	TTAGAACTTTGTATGTGGTGGCGCAAAAGCCAAAACTGCCATATACCAAACGGATCCCCGGGTTAATTAA	AAGTAATTCTTGAACAATTTAAAAAAAAAATTGGTACGGCGGCACAATTAGAATTCGAGCTCGTTTAAAC	2	YBR224W;YBR226C	2	YBR224W;YBR226C	0
YBR226C	YBR226C	2	658553	658964	-	ACATTCATACCCCAACAATTCCCAAGAGAAGCTTAACATAAAAAAAAATG	CGGTATCCTTTGGAGGACAACTACTATCTGGTAGTTGCCTCCTTAACATG	ACAGATATGGGCTTTTTGAATGAATTTAATTCTTTAGATATGTGGGACTA	ACATTCATACCCCAACAATTCCCAAGAGAAGCTTAACATAAAAAAAAATGCGGATCCCCGGGTTAATTAA	CGGTATCCTTTGGAGGACAACTACTATCTGGTAGTTGCCTCCTTAACATGCGGATCCCCGGGTTAATTAA	ACAGATATGGGCTTTTTGAATGAATTTAATTCTTTAGATATGTGGGACTAGAATTCGAGCTCGTTTAAAC	1	YBR225W	1	YBR225W	0
YBR227C	MCX1	2	658971	660533	-	CAAACAAAACCATAGAAGACAAGGCACTCTAATTATATTTCACACTCATG	GTCATTCTGCTAACATTCATACCCCAACAATTCCCAAGAGAAGCTTAACA	ACATTTATTACATCTATATTTATATATTCTATACCATTCATTTTTTTTTA	CAAACAAAACCATAGAAGACAAGGCACTCTAATTATATTTCACACTCATGCGGATCCCCGGGTTAATTAA	GTCATTCTGCTAACATTCATACCCCAACAATTCCCAAGAGAAGCTTAACACGGATCCCCGGGTTAATTAA	ACATTTATTACATCTATATTTATATATTCTATACCATTCATTTTTTTTTAGAATTCGAGCTCGTTTAAAC	0		0		0
YBR228W	SLX1	2	660712	661626	+	TAATGTTCTCTTTTTTCAAAAAATATTGAAAAGATAAGAAAGGTACCATG	GGACGACCCTAGTCAAGTTTTCGACAAGAATGAAGTTAGCTCACGGGAAG	ATAACCATTATCTATAGAAAAAAAAGAACCGAAAATTGTGTCAGGCCCTA	TAATGTTCTCTTTTTTCAAAAAATATTGAAAAGATAAGAAAGGTACCATGCGGATCCCCGGGTTAATTAA	GGACGACCCTAGTCAAGTTTTCGACAAGAATGAAGTTAGCTCACGGGAAGCGGATCCCCGGGTTAATTAA	ATAACCATTATCTATAGAAAAAAAAGAACCGAAAATTGTGTCAGGCCCTAGAATTCGAGCTCGTTTAAAC	0		0		0
YBR229C	ROT2,GLS2	2	661756	664620	-	TGCTCTGCGTATCTTAAAATAGCGGTCTCGAATCAACCGTATGCAACATG	CCATTCTTAACCTATCGCTTGACATAACTAAAGATTGGGAAGTTATTTTT	TAAGAAAGAGCTAAAAAGATGTAAAGATACCCCTTCGTTTTTTTCCCTCA	TGCTCTGCGTATCTTAAAATAGCGGTCTCGAATCAACCGTATGCAACATGCGGATCCCCGGGTTAATTAA	CCATTCTTAACCTATCGCTTGACATAACTAAAGATTGGGAAGTTATTTTTCGGATCCCCGGGTTAATTAA	TAAGAAAGAGCTAAAAAGATGTAAAGATACCCCTTCGTTTTTTTCCCTCAGAATTCGAGCTCGTTTAAAC	0		0		0
YBR230C	OM14	2	664949	665450	-	TATTCCAACAATTAGAAACATAACATCTACCTCCAGCATCTCATAATATG	CGCTGGACGGTATAATTTCAAAGAAATACTACTCCAGATACGACAAGAAA	TGTGAGTGTGTGAGTGTGTGAAAAGGATGTTATTAAATAGTATGTTATTA	TATTCCAACAATTAGAAACATAACATCTACCTCCAGCATCTCATAATATGCGGATCCCCGGGTTAATTAA	CGCTGGACGGTATAATTTCAAAGAAATACTACTCCAGATACGACAAGAAACGGATCCCCGGGTTAATTAA	TGTGAGTGTGTGAGTGTGTGAAAAGGATGTTATTAAATAGTATGTTATTAGAATTCGAGCTCGTTTAAAC	0		0		0
YBR230W-A	YBR230W-A	2	665760	665960	+	TAAGCAACAAAGGAAAAGGAAACAAGTAAAAAAAAAAAGAGACTAGCATG	AAGCAGCTAAGGCCCTATCACAACGGGTCAAGAAAGAGTACACCGCCAAT	CACGCAACCAAATATGTAAGTATATAAAATATATGTATGTGTGTGCACTA	TAAGCAACAAAGGAAAAGGAAACAAGTAAAAAAAAAAAGAGACTAGCATGCGGATCCCCGGGTTAATTAA	AAGCAGCTAAGGCCCTATCACAACGGGTCAAGAAAGAGTACACCGCCAATCGGATCCCCGGGTTAATTAA	CACGCAACCAAATATGTAAGTATATAAAATATATGTATGTGTGTGCACTAGAATTCGAGCTCGTTTAAAC	0		0		0
YBR231C	SWC5,AOR1	2	667579	668490	-	AAACTGGAATAATATTGTTTCAAGAAAGAAAACCCACTAGCCTATAAATG	TGCGCCGGCAACAACTTGCTCAGCAGTTGCAGCAGGATAACGAAGCTTCA	AAAAATTTGAGCATAAAAGCATGTTATTTAATACATGTAATATTTGTCTA	AAACTGGAATAATATTGTTTCAAGAAAGAAAACCCACTAGCCTATAAATGCGGATCCCCGGGTTAATTAA	TGCGCCGGCAACAACTTGCTCAGCAGTTGCAGCAGGATAACGAAGCTTCACGGATCCCCGGGTTAATTAA	AAAAATTTGAGCATAAAAGCATGTTATTTAATACATGTAATATTTGTCTAGAATTCGAGCTCGTTTAAAC	0		0		0
YBR232C	YBR232C	2	668773	669132	-	CCCTCACGTAAACAATTCTTTCAGGAACACCTCTGATATTATTTGATATG	TTGAGCTAAAAAGTATTACAGAAAGATTATTTAATGCCGCGCTGGACGAT	CTTTTTCATATTCAAACTTATCCATAGCCACATCCACTCTAACAATTTTA	CCCTCACGTAAACAATTCTTTCAGGAACACCTCTGATATTATTTGATATGCGGATCCCCGGGTTAATTAA	TTGAGCTAAAAAGTATTACAGAAAGATTATTTAATGCCGCGCTGGACGATCGGATCCCCGGGTTAATTAA	CTTTTTCATATTCAAACTTATCCATAGCCACATCCACTCTAACAATTTTAGAATTCGAGCTCGTTTAAAC	1	YBR233W	1	YBR233W	0
YBR233W	PBP2,HEK1	2	668828	670069	+	CCAGCGCGGCATTAAATAATCTTTCTGTAATACTTTTTAGCTCAATTATG	AAATTGAAATTGATAGATCAAATGCTGAACGTAAAAGAAGGTCGCCCCTC	TTTCTGTATTTTTATTTTCTATGTGTTTTTATTGACTAGCAGTATATTTA	CCAGCGCGGCATTAAATAATCTTTCTGTAATACTTTTTAGCTCAATTATGCGGATCCCCGGGTTAATTAA	AAATTGAAATTGATAGATCAAATGCTGAACGTAAAAGAAGGTCGCCCCTCCGGATCCCCGGGTTAATTAA	TTTCTGTATTTTTATTTTCTATGTGTTTTTATTGACTAGCAGTATATTTAGAATTCGAGCTCGTTTAAAC	1	YBR232C	1	YBR232C	0
YBR233W-A	DAD3	2	670378	670662	+	AGCCAGTCAAAGTCGCTGTGAAACATACACGGCGTTGTAGTCACAGTATG	TTATCTTGCAAAGAAAGCAAGAACAGGAGTCTTTGGGTAGCAATTCTAAA	GTGCCGTAAAAAATAAAGCATCAGAATCAATTTCTTGCACCAAACCATTA	AGCCAGTCAAAGTCGCTGTGAAACATACACGGCGTTGTAGTCACAGTATGCGGATCCCCGGGTTAATTAA	TTATCTTGCAAAGAAAGCAAGAACAGGAGTCTTTGGGTAGCAATTCTAAACGGATCCCCGGGTTAATTAA	GTGCCGTAAAAAATAAAGCATCAGAATCAATTTCTTGCACCAAACCATTAGAATTCGAGCTCGTTTAAAC	0		0		0
YBR234C	ARC40	2	670838	671992	-	TAGGAAAAATAAGCCAAAGTAAACGTATATTAGTTGAGAGTCTCCTAATG	CACAAGTCTCTTCCTGTGGGTTAGACGGTAAGATCGTCATTTATACAATT	TGAGGTAGGGAATACACATAACAATATATATATATACGTATGTATATTTA	TAGGAAAAATAAGCCAAAGTAAACGTATATTAGTTGAGAGTCTCCTAATGCGGATCCCCGGGTTAATTAA	CACAAGTCTCTTCCTGTGGGTTAGACGGTAAGATCGTCATTTATACAATTCGGATCCCCGGGTTAATTAA	TGAGGTAGGGAATACACATAACAATATATATATATACGTATGTATATTTAGAATTCGAGCTCGTTTAAAC	0		0		0
YBR235W	YBR235W	2	672301	675663	+	TTTTGCCAGCCAATTCTCTTTAAGAATAGGCCTTTCTTGTAGGATTAATG	CTCCATGCATGTTAATCAATTCGCAAACCATGACAGTAACTACTGCATTA	TGTAGTAAATAAGTTCTGGGGAAATGCATAACGATATATGTGTTATTCTA	TTTTGCCAGCCAATTCTCTTTAAGAATAGGCCTTTCTTGTAGGATTAATGCGGATCCCCGGGTTAATTAA	CTCCATGCATGTTAATCAATTCGCAAACCATGACAGTAACTACTGCATTACGGATCCCCGGGTTAATTAA	TGTAGTAAATAAGTTCTGGGGAAATGCATAACGATATATGTGTTATTCTAGAATTCGAGCTCGTTTAAAC	0		0		0
YBR236C	ABD1	2	675783	677093	-	AACTACTACAACGTGGAGTCGTCCATTATTCGTGTTAGAAAAGTAGAATG	CATTCCGTAAGGTAAAACAGTATATCGAACCGGAAAGCGTAAAGCCCAAC	AATACAGATGCTTTATAGTAGGGTTATTGTTTCTATTCATTTTTATTTCA	AACTACTACAACGTGGAGTCGTCCATTATTCGTGTTAGAAAAGTAGAATGCGGATCCCCGGGTTAATTAA	CATTCCGTAAGGTAAAACAGTATATCGAACCGGAAAGCGTAAAGCCCAACCGGATCCCCGGGTTAATTAA	AATACAGATGCTTTATAGTAGGGTTATTGTTTCTATTCATTTTTATTTCAGAATTCGAGCTCGTTTAAAC	0		0		0
YBR237W	PRP5,RNA5	2	677369	679918	+	TTCGAGAAGGGAAATTATAACGCTGTTGTCTTGGGTTTATTTGAGGTATG	AAGAGGGGGTCGTAAAGGCTGCAAGCTTGTCTTTGAAGAGTACTAAGTAC	CTAACTACGAAAGTATATAGCACCACGAGTGAGTTAAATTCTAAAAACTA	TTCGAGAAGGGAAATTATAACGCTGTTGTCTTGGGTTTATTTGAGGTATGCGGATCCCCGGGTTAATTAA	AAGAGGGGGTCGTAAAGGCTGCAAGCTTGTCTTTGAAGAGTACTAAGTACCGGATCCCCGGGTTAATTAA	CTAACTACGAAAGTATATAGCACCACGAGTGAGTTAAATTCTAAAAACTAGAATTCGAGCTCGTTTAAAC	0		0		0
YBR238C	YBR238C	2	680509	682704	-	TGATATTTCTTACTCTAATTGCTTTTCTATCTTGCAAATCTGATCCTATG	TTAACGATATTCCTATTCCTGAATTACATAATTTGAAGCCAACGTGTGTT	TTTTTTGTTCTGTAGAGAAAGAAGGTGAAAAGTGAAGGATATTAACTTTA	TGATATTTCTTACTCTAATTGCTTTTCTATCTTGCAAATCTGATCCTATGCGGATCCCCGGGTTAATTAA	TTAACGATATTCCTATTCCTGAATTACATAATTTGAAGCCAACGTGTGTTCGGATCCCCGGGTTAATTAA	TTTTTTGTTCTGTAGAGAAAGAAGGTGAAAAGTGAAGGATATTAACTTTAGAATTCGAGCTCGTTTAAAC	0		0		0
YBR239C	YBR239C	2	683753	685342	-	CAGACACACGAAGGTATAAAAATAAAATACATTGATGAATCATCGTGATG	TCTCTGGTTTGCCCCTCATGATCTTGGGTAACTTCATGCCCATACTCAAT	GTATTATATAATACGAGGTAGTAAAATGAGAAAAAAAGAAAAAAAAGTCA	CAGACACACGAAGGTATAAAAATAAAATACATTGATGAATCATCGTGATGCGGATCCCCGGGTTAATTAA	TCTCTGGTTTGCCCCTCATGATCTTGGGTAACTTCATGCCCATACTCAATCGGATCCCCGGGTTAATTAA	GTATTATATAATACGAGGTAGTAAAATGAGAAAAAAAGAAAAAAAAGTCAGAATTCGAGCTCGTTTAAAC	0		0		0
YBR240C	THI2,PHO6	2	685901	687253	-	TCACCACGTATATATATAGCCTATATATATATCCGCACTAGAACCAAATG	AACTGAAGTGTAATCAACAATTTTACAAGGATGTATATGCCATGCAGGAC	TTTGGCTTTTTTTTTCTTGAAATGAGTGAAGGGAAGGCTCAATAAGCCTA	TCACCACGTATATATATAGCCTATATATATATCCGCACTAGAACCAAATGCGGATCCCCGGGTTAATTAA	AACTGAAGTGTAATCAACAATTTTACAAGGATGTATATGCCATGCAGGACCGGATCCCCGGGTTAATTAA	TTTGGCTTTTTTTTTCTTGAAATGAGTGAAGGGAAGGCTCAATAAGCCTAGAATTCGAGCTCGTTTAAAC	0		0		0
YBR241C	YBR241C	2	688002	689468	-	TTGGAACAACAACAAAACACAGAGACTAAGGCATAACAAACTAAGTCATG	TACCCGAGACAAAGGGCAAGACTACATACAGCGAGGTTTGGGCTGGCTAC	GAAAGAAGTAAAAAATAGTTGCTTAGGTATATATGACTGGCTACAGATCA	TTGGAACAACAACAAAACACAGAGACTAAGGCATAACAAACTAAGTCATGCGGATCCCCGGGTTAATTAA	TACCCGAGACAAAGGGCAAGACTACATACAGCGAGGTTTGGGCTGGCTACCGGATCCCCGGGTTAATTAA	GAAAGAAGTAAAAAATAGTTGCTTAGGTATATATGACTGGCTACAGATCAGAATTCGAGCTCGTTTAAAC	0		0		0
YBR242W	YBR242W	2	690084	690800	+	TATTCTCATAAAAAACAATTGTCAAAGAAAGCCTACATAAAAAAAATATG	TCGTGCAGCGCCAAAAATACTTCGCCGATTTGACTCAATCGATAACTAAA	GTAGTTACTTTGTACTTTTATGACGCAAAAGTTGGTATTTATGATAATTA	TATTCTCATAAAAAACAATTGTCAAAGAAAGCCTACATAAAAAAAATATGCGGATCCCCGGGTTAATTAA	TCGTGCAGCGCCAAAAATACTTCGCCGATTTGACTCAATCGATAACTAAACGGATCCCCGGGTTAATTAA	GTAGTTACTTTGTACTTTTATGACGCAAAAGTTGGTATTTATGATAATTAGAATTCGAGCTCGTTTAAAC	0		0		0
YBR243C	ALG7,TUR1	2	690861	692207	-	TTTATCAAGTAGAGCAAGGCGGAGAACGGTAACAAAAAGTAGACTATATG	ACGCTATAGGCGCTATCATCTTTGGCCACGACAACCTATGGACAGTACGT	CAACTTTTGCGTCATAAAAGTACAAAGTAACTACCAATACATAATCTTCA	TTTATCAAGTAGAGCAAGGCGGAGAACGGTAACAAAAAGTAGACTATATGCGGATCCCCGGGTTAATTAA	ACGCTATAGGCGCTATCATCTTTGGCCACGACAACCTATGGACAGTACGTCGGATCCCCGGGTTAATTAA	CAACTTTTGCGTCATAAAAGTACAAAGTAACTACCAATACATAATCTTCAGAATTCGAGCTCGTTTAAAC	0		0		0
YBR244W	GPX2,AMI1	2	692942	693430	+	CTGACCTTGATAAGAATACAATTAGCAACAAAAAGTAATAATTCAAAATG	TAACAAAACCATCGTCCTTGGACCAAGAAATCCAAAGCCTGTTAAGTAAA	TGTATTATTTATTGTTCCGGATAATTGCTTGATTATAGACAAAGATATCA	CTGACCTTGATAAGAATACAATTAGCAACAAAAAGTAATAATTCAAAATGCGGATCCCCGGGTTAATTAA	TAACAAAACCATCGTCCTTGGACCAAGAAATCCAAAGCCTGTTAAGTAAACGGATCCCCGGGTTAATTAA	TGTATTATTTATTGTTCCGGATAATTGCTTGATTATAGACAAAGATATCAGAATTCGAGCTCGTTTAAAC	0		0		0
YBR245C	ISW1,SGN2	2	693564	696953	-	ATAGCTATGCAAAAACCAGCTAGAGGTGGATGTAGAAATACCCTATTATG	GAACTGAACAGTTGGTAGCAGAGAAAATTCCGGAAAACGAAACCACTCAT	ATGGTGTAGGATATATTAAAAAAAATCGAAATATAAAAAAAGAAGGTTTA	ATAGCTATGCAAAAACCAGCTAGAGGTGGATGTAGAAATACCCTATTATGCGGATCCCCGGGTTAATTAA	GAACTGAACAGTTGGTAGCAGAGAAAATTCCGGAAAACGAAACCACTCATCGGATCCCCGGGTTAATTAA	ATGGTGTAGGATATATTAAAAAAAATCGAAATATAAAAAAAGAAGGTTTAGAATTCGAGCTCGTTTAAAC	0		0		0
YBR246W	YBR246W	2	697005	698168	+	GGGTATTTCTACATCCACCTCTAGCTGGTTTTTGCATAGCTATACATATG	TGATCGCAACATGCTCATTTTATGATAATTCCTTGCAAACATGGATAGTT	TATTAGCCTATATATTAGTCCATATATTGCAGACTGAATTTTTTTTTCTA	GGGTATTTCTACATCCACCTCTAGCTGGTTTTTGCATAGCTATACATATGCGGATCCCCGGGTTAATTAA	TGATCGCAACATGCTCATTTTATGATAATTCCTTGCAAACATGGATAGTTCGGATCCCCGGGTTAATTAA	TATTAGCCTATATATTAGTCCATATATTGCAGACTGAATTTTTTTTTCTAGAATTCGAGCTCGTTTAAAC	0		0		0
YBR247C	ENP1,MEG1	2	698418	699869	-	GTTTTAAGACTTACAGATAAAACAATATATTAGAAAGATTAACTATAATG	AGTTTGTTGATCCACAGGAAGCTAATGATGATTTAATGATTGATGTCAAT	GGAAAGACCGAGCGATATAAAATTGATGAAAAATTGATATTACAGCATCA	GTTTTAAGACTTACAGATAAAACAATATATTAGAAAGATTAACTATAATGCGGATCCCCGGGTTAATTAA	AGTTTGTTGATCCACAGGAAGCTAATGATGATTTAATGATTGATGTCAATCGGATCCCCGGGTTAATTAA	GGAAAGACCGAGCGATATAAAATTGATGAAAAATTGATATTACAGCATCAGAATTCGAGCTCGTTTAAAC	0		0		0
YBR248C	HIS7	2	700221	701879	-	GTATCCAGTTTAGGTTTTTTAATTATTTATAAGTAAAGAAAAAGAAAATG	TAAAGGAGTATTTACTAGAGCACGGATTAAAGGTTAGAATGGATGAAGAG	CGTATATAGACTGAGTCAAGATTATAAAGTATACATATCCAACCACATTA	GTATCCAGTTTAGGTTTTTTAATTATTTATAAGTAAAGAAAAAGAAAATGCGGATCCCCGGGTTAATTAA	TAAAGGAGTATTTACTAGAGCACGGATTAAAGGTTAGAATGGATGAAGAGCGGATCCCCGGGTTAATTAA	CGTATATAGACTGAGTCAAGATTATAAAGTATACATATCCAACCACATTAGAATTCGAGCTCGTTTAAAC	0		0		0
YBR249C	ARO4	2	702296	703408	-	TTATATATTTAACCGCTAAATTTAGTAAACAAAAGAATCTATCAGAAATG	TGAGGAAGTTGGCTGCTGCTGTCAGACAAAGAAGAGAAGTTAACAAGAAA	AGTGGTAGAGGAAAGAATGTACGTTACATATATCATTAAAAAAACATCTA	TTATATATTTAACCGCTAAATTTAGTAAACAAAAGAATCTATCAGAAATGCGGATCCCCGGGTTAATTAA	TGAGGAAGTTGGCTGCTGCTGTCAGACAAAGAAGAGAAGTTAACAAGAAACGGATCCCCGGGTTAATTAA	AGTGGTAGAGGAAAGAATGTACGTTACATATATCATTAAAAAAACATCTAGAATTCGAGCTCGTTTAAAC	0		0		0
YBR250W	SPO23	2	704447	706018	+	CTTGCAACAAAATCAGACAAATAGAATTTCCCTTTTTTGTTTGACTAATG	TACAAGATGAACCCCCACTATATTCTATGGTAGCAGGTGAGAATAGCTTA	AAAAAAAAAAGGATAAAATAGAGGCGTTGTTCTAAGGTACCGAACATTCA	CTTGCAACAAAATCAGACAAATAGAATTTCCCTTTTTTGTTTGACTAATGCGGATCCCCGGGTTAATTAA	TACAAGATGAACCCCCACTATATTCTATGGTAGCAGGTGAGAATAGCTTACGGATCCCCGGGTTAATTAA	AAAAAAAAAAGGATAAAATAGAGGCGTTGTTCTAAGGTACCGAACATTCAGAATTCGAGCTCGTTTAAAC	0		0		0
YBR251W	MRPS5	2	706804	707727	+	GACGGTAAACCATACAAGAAACAGATTTCATAGATCAATAGGTAAAGATG	TGGGTAGAGGCAAAAAGCTTGTTGATGTCAGGAAAGTTTACTATTCAAGC	CTTATGTAAAACGAGAGATAATGGTGCGTGTGTATGTACATAGTATTTCA	GACGGTAAACCATACAAGAAACAGATTTCATAGATCAATAGGTAAAGATGCGGATCCCCGGGTTAATTAA	TGGGTAGAGGCAAAAAGCTTGTTGATGTCAGGAAAGTTTACTATTCAAGCCGGATCCCCGGGTTAATTAA	CTTATGTAAAACGAGAGATAATGGTGCGTGTGTATGTACATAGTATTTCAGAATTCGAGCTCGTTTAAAC	0		0		0
YBR252W	DUT1	2	708025	708468	+	CTCGAATGAGATGTTTGCACTGATATAGCGAGCCAAAAAATAACCAAATG	CTCTGGAAGAAAGTGCAAGAGGGGCCGGTGGCTTTGGTAGCACTGGTAAC	TGATTTTATTATACATTATACAAGTGTGCCAAAGTATATACACTAAGTTA	CTCGAATGAGATGTTTGCACTGATATAGCGAGCCAAAAAATAACCAAATGCGGATCCCCGGGTTAATTAA	CTCTGGAAGAAAGTGCAAGAGGGGCCGGTGGCTTTGGTAGCACTGGTAACCGGATCCCCGGGTTAATTAA	TGATTTTATTATACATTATACAAGTGTGCCAAAGTATATACACTAAGTTAGAATTCGAGCTCGTTTAAAC	0		0		0
YBR253W	SRB6,MED22	2	708684	709049	+	ACAGATTGTGATGATAGGCATCCTGTACTCCTTTTTTTTACAAGAAAATG	AGGAATTACTGGATAACTGTATAGAAACGTTCGTGGCGGAAAAAACTACG	ATGTATTTTTTTTTTTTTTGGCCAAATAATAGATAAATACCGCCTTTTTA	ACAGATTGTGATGATAGGCATCCTGTACTCCTTTTTTTTACAAGAAAATGCGGATCCCCGGGTTAATTAA	AGGAATTACTGGATAACTGTATAGAAACGTTCGTGGCGGAAAAAACTACGCGGATCCCCGGGTTAATTAA	ATGTATTTTTTTTTTTTTTGGCCAAATAATAGATAAATACCGCCTTTTTAGAATTCGAGCTCGTTTAAAC	0		0		0
YBR254C	TRS20	2	709149	709676	-	ACTAATACGAATAGAGAATACAGAAAAAACATACAAAGCACATTGAGATG	CGGCATTCGACTCGAGGGTAAGGACATTAGCACGTAAGCATTTGTCCAAA	ATATACATATACGCCATAAAAAATCTCTGCATCTATCTTATTTCCCATTA	ACTAATACGAATAGAGAATACAGAAAAAACATACAAAGCACATTGAGATGCGGATCCCCGGGTTAATTAA	CGGCATTCGACTCGAGGGTAAGGACATTAGCACGTAAGCATTTGTCCAAACGGATCCCCGGGTTAATTAA	ATATACATATACGCCATAAAAAATCTCTGCATCTATCTTATTTCCCATTAGAATTCGAGCTCGTTTAAAC	0		0		0
YBR255W	YBR255W	2	709869	711953	+	ATATACACTTCAGCAGAGGAGGGGGAGGTACTTTAAACGGATGAAACATG	TTCGGTTCACAATTTTTTTAGTTCTAAAAATCATTAAGGCATTGCTGTGG	TATATCAGTGCAGATGGTTTATTTCTATAAATACATAGACCCGCAAATTA	ATATACACTTCAGCAGAGGAGGGGGAGGTACTTTAAACGGATGAAACATGCGGATCCCCGGGTTAATTAA	TTCGGTTCACAATTTTTTTAGTTCTAAAAATCATTAAGGCATTGCTGTGGCGGATCCCCGGGTTAATTAA	TATATCAGTGCAGATGGTTTATTTCTATAAATACATAGACCCGCAAATTAGAATTCGAGCTCGTTTAAAC	0		0		0
YBR255C-A	YBR255C-A	2	712031	712487	-	GTAACCAACCGTCCCTAAATACCAACGACACAAAAACTGCTGCTACTATG	GAGGCCTTTTTCTGGAGGATGAGAGTTTGAACTCTTCCCGGTCAACTACA	CCATCTGCACTGATATATGAATATATAAGTAGACATGAAAATAACTTTCA	GTAACCAACCGTCCCTAAATACCAACGACACAAAAACTGCTGCTACTATGCGGATCCCCGGGTTAATTAA	GAGGCCTTTTTCTGGAGGATGAGAGTTTGAACTCTTCCCGGTCAACTACACGGATCCCCGGGTTAATTAA	CCATCTGCACTGATATATGAATATATAAGTAGACATGAAAATAACTTTCAGAATTCGAGCTCGTTTAAAC	0		0		0
YBR256C	RIB5	2	712799	713515	-	CCTAACGTACATGTCAAACCAATTGGTGAGATCGTAACCATAGCACAATG	CTATGATCTCAAACATTATCGAGGAGAAGGTTAGAAACTACCTAAATAAA	CACTTCAAAAATGCGTTTATGAAACCTATTTATGACGAATTTTTTATTTA	CCTAACGTACATGTCAAACCAATTGGTGAGATCGTAACCATAGCACAATGCGGATCCCCGGGTTAATTAA	CTATGATCTCAAACATTATCGAGGAGAAGGTTAGAAACTACCTAAATAAACGGATCCCCGGGTTAATTAA	CACTTCAAAAATGCGTTTATGAAACCTATTTATGACGAATTTTTTATTTAGAATTCGAGCTCGTTTAAAC	0		0		0
YBR257W	POP4	2	714298	715137	+	AAAGACTAAAGAAAATAAGCACGATTTGGACTCCCCTATTTGTCAGAATG	GGAAGTTCAAAAGTCGTCGTTGTGATGATATGCTATATTATATACAGAAT	TGAACTCTTATGAAGAGGAAGCAAATGGAAGTACGTAATAACTCTTACTA	AAAGACTAAAGAAAATAAGCACGATTTGGACTCCCCTATTTGTCAGAATGCGGATCCCCGGGTTAATTAA	GGAAGTTCAAAAGTCGTCGTTGTGATGATATGCTATATTATATACAGAATCGGATCCCCGGGTTAATTAA	TGAACTCTTATGAAGAGGAAGCAAATGGAAGTACGTAATAACTCTTACTAGAATTCGAGCTCGTTTAAAC	0		0		0
YBR258C	SHG1,CPS15	2	715147	715575	-	AGCTGAAACACAGTATAAGAGAGTAGAGCTTATTTCAAATCAAAAAAATG	AACTTCAGGAAACACTGAACTCTTATGAAGAGGAAGCAAATGGAAGTACG	GTCGTTGTGATGATATGCTATATTATATACAGAATTAGTAAGAGTTATTA	AGCTGAAACACAGTATAAGAGAGTAGAGCTTATTTCAAATCAAAAAAATGCGGATCCCCGGGTTAATTAA	AACTTCAGGAAACACTGAACTCTTATGAAGAGGAAGCAAATGGAAGTACGCGGATCCCCGGGTTAATTAA	GTCGTTGTGATGATATGCTATATTATATACAGAATTAGTAAGAGTTATTAGAATTCGAGCTCGTTTAAAC	0		0		0
YBR259W	YBR259W	2	715800	717866	+	CAAGCGGTATATGAACTCAGTTTTAAGGTGTAGTTTATTTTATAGTCATG	ATTTTAAGTACAAAAGGGATGGACAGAAAACATCATTAATAAGGTTAATT	ATTTACTACAAAACTTGCTAAGGTCCAACTCCCTGTCTTCACGGTTGTTA	CAAGCGGTATATGAACTCAGTTTTAAGGTGTAGTTTATTTTATAGTCATGCGGATCCCCGGGTTAATTAA	ATTTTAAGTACAAAAGGGATGGACAGAAAACATCATTAATAAGGTTAATTCGGATCCCCGGGTTAATTAA	ATTTACTACAAAACTTGCTAAGGTCCAACTCCCTGTCTTCACGGTTGTTAGAATTCGAGCTCGTTTAAAC	0		0		0
YBR260C	RGD1	2	718051	720051	-	AAAAACATACAATCTCGGAAGATTAAAAGAGAAGTGATATAGACAAGATG	TGGCAATGGAAGTATTATTAGAGGTTTCAGATCAAGCTTTTGAGCCTGAA	TACAAGTGGAAATTAAAGACGGAATGAAAATATCATAAGTGCTATGTTTA	AAAAACATACAATCTCGGAAGATTAAAAGAGAAGTGATATAGACAAGATGCGGATCCCCGGGTTAATTAA	TGGCAATGGAAGTATTATTAGAGGTTTCAGATCAAGCTTTTGAGCCTGAACGGATCCCCGGGTTAATTAA	TACAAGTGGAAATTAAAGACGGAATGAAAATATCATAAGTGCTATGTTTAGAATTCGAGCTCGTTTAAAC	0		0		0
YBR261C	YBR261C	2	720243	720941	-	CATCGGTGTCAAGAGCATCTCCAAGAAAGAATACATAAACAACAACGATG	CAAGAGAATTGTACCCAGTGAGGATGTACGCACTCAAGCCCATGCCAAAC	AGCACAAGAAAAGGGGCGTATCTATATAAATCTATGCATCCTTGATCCTA	CATCGGTGTCAAGAGCATCTCCAAGAAAGAATACATAAACAACAACGATGCGGATCCCCGGGTTAATTAA	CAAGAGAATTGTACCCAGTGAGGATGTACGCACTCAAGCCCATGCCAAACCGGATCCCCGGGTTAATTAA	AGCACAAGAAAAGGGGCGTATCTATATAAATCTATGCATCCTTGATCCTAGAATTCGAGCTCGTTTAAAC	0		0		0
YBR262C	FMP51	2	721131	721451	-	GACAGAACAGACAGTGGACTAAGAACCAGCAGATAACGGAGAGAATCATG	ATGAACAGATAAGAAACTCTGTCGATTGGATCTACTCCTGGGGTAAGAAT	TTATATACATGAGGATGTTCGTTACAGTAGGAGAAATAGAAAGCTCGCTA	GACAGAACAGACAGTGGACTAAGAACCAGCAGATAACGGAGAGAATCATGCGGATCCCCGGGTTAATTAA	ATGAACAGATAAGAAACTCTGTCGATTGGATCTACTCCTGGGGTAAGAATCGGATCCCCGGGTTAATTAA	TTATATACATGAGGATGTTCGTTACAGTAGGAGAAATAGAAAGCTCGCTAGAATTCGAGCTCGTTTAAAC	0		0		0
YBR263W	SHM1,TMP3,SHMT1	2	721675	723147	+	AATCATCAAGCCGACATTTCCACATCGAGTCTCATAGTCTTTCAATCATG	CTGGCGAGATTTCCAAGTGGGTCGGTCAATACCCTGTCCCAGGTGATATC	GCTGTATATGTTAATACATAAAGTATTTGATTTTAAATCATAATTACTTA	AATCATCAAGCCGACATTTCCACATCGAGTCTCATAGTCTTTCAATCATGCGGATCCCCGGGTTAATTAA	CTGGCGAGATTTCCAAGTGGGTCGGTCAATACCCTGTCCCAGGTGATATCCGGATCCCCGGGTTAATTAA	GCTGTATATGTTAATACATAAAGTATTTGATTTTAAATCATAATTACTTAGAATTCGAGCTCGTTTAAAC	0		0		0
YBR264C	YPT10	2	723181	723780	-	AATTACTCCAGGAAATACAAGTAGCACAAAATACGGAGGAATACGATATG	GAAATATACTGGAAATAAATAAAAAAAAAAGCGGCAGTGGCTGTATATGT	CAGGTGATATCTAAGTAATTATGATTTAAAATCAAATACTTTATGTATTA	AATTACTCCAGGAAATACAAGTAGCACAAAATACGGAGGAATACGATATGCGGATCCCCGGGTTAATTAA	GAAATATACTGGAAATAAATAAAAAAAAAAGCGGCAGTGGCTGTATATGTCGGATCCCCGGGTTAATTAA	CAGGTGATATCTAAGTAATTATGATTTAAAATCAAATACTTTATGTATTAGAATTCGAGCTCGTTTAAAC	0		0		0
YBR265W	TSC10	2	723993	724955	+	AAGATTGCCTCAAGAAAAGAAGTTATCGGTATAATCTTTTGTAGGTAATG	CCTGGTATATCAGGAAATGGTTTCGTGAAAATGACGGCAAGAAGGCCAAC	AATAAAGAGAGTCACGGGGAATATCGGGAATGAGAGTGGATGTGCTCTCA	AAGATTGCCTCAAGAAAAGAAGTTATCGGTATAATCTTTTGTAGGTAATGCGGATCCCCGGGTTAATTAA	CCTGGTATATCAGGAAATGGTTTCGTGAAAATGACGGCAAGAAGGCCAACCGGATCCCCGGGTTAATTAA	AATAAAGAGAGTCACGGGGAATATCGGGAATGAGAGTGGATGTGCTCTCAGAATTCGAGCTCGTTTAAAC	0		0		0
YBR267W	REI1	2	725252	726433	+	ATGCTTCTCATTAGAAGTCAAGAAGAGAGCATATCAGTAACAATACGATG	GTGCCAAGTTCGTCAATAACCAACCACACTACAGAGACCAACTTCTGCAG	AGCAGTATATATGCGACAAAATACTAAAAAAAGTAGTGCAAAAAGAATTA	ATGCTTCTCATTAGAAGTCAAGAAGAGAGCATATCAGTAACAATACGATGCGGATCCCCGGGTTAATTAA	GTGCCAAGTTCGTCAATAACCAACCACACTACAGAGACCAACTTCTGCAGCGGATCCCCGGGTTAATTAA	AGCAGTATATATGCGACAAAATACTAAAAAAAGTAGTGCAAAAAGAATTAGAATTCGAGCTCGTTTAAAC	1	YBR266C	1	YBR266C	0
YBR266C	SLM6	2	725347	725799	-	CGACTAGATATTTCTGTTCTGGGATATAAAACCCGTGGGTCCTAAACATG	ATGTCTCAAATGATATTGGTGGCAATTGTGCAACACGTCTTTTCAAATTG	GATGCAAGCGACGAGCAGCGGGCCCACATGAAGTCCGATTGGCATCGCTA	CGACTAGATATTTCTGTTCTGGGATATAAAACCCGTGGGTCCTAAACATGCGGATCCCCGGGTTAATTAA	ATGTCTCAAATGATATTGGTGGCAATTGTGCAACACGTCTTTTCAAATTGCGGATCCCCGGGTTAATTAA	GATGCAAGCGACGAGCAGCGGGCCCACATGAAGTCCGATTGGCATCGCTAGAATTCGAGCTCGTTTAAAC	1	YBR267W	1	YBR267W	0
YBR268W	MRPL37	2	726710	727027	+	AAAGCAGTTATATCTACAGCAAAGGAAATAGCTGCTGAAGACTGAAGATG	GGAAGGCGAACAGGCAGCGAATCAAGCAAAACAATTTCTTGAGCCAACTT	ACATATTTATTTACAAGGATACCAAACTTGATCTTATTAACGGAGGCTTA	AAAGCAGTTATATCTACAGCAAAGGAAATAGCTGCTGAAGACTGAAGATGCGGATCCCCGGGTTAATTAA	GGAAGGCGAACAGGCAGCGAATCAAGCAAAACAATTTCTTGAGCCAACTTCGGATCCCCGGGTTAATTAA	ACATATTTATTTACAAGGATACCAAACTTGATCTTATTAACGGAGGCTTAGAATTCGAGCTCGTTTAAAC	0		0		0
YBR269C	FMP21	2	727571	727987	-	AACTTGCTAAAGAGTCAGAAAGAACCAAATAATAAAAAGAAGAACTAATG	ACCCGTTGAGACACGGCGATTATTCGTTTAACGGAAGAGTAACGGATTTC	TTCATCAAATAAGAATAGTATTATTAAAAATTGGCCGGACCAAATATCTA	AACTTGCTAAAGAGTCAGAAAGAACCAAATAATAAAAAGAAGAACTAATGCGGATCCCCGGGTTAATTAA	ACCCGTTGAGACACGGCGATTATTCGTTTAACGGAAGAGTAACGGATTTCCGGATCCCCGGGTTAATTAA	TTCATCAAATAAGAATAGTATTATTAAAAATTGGCCGGACCAAATATCTAGAATTCGAGCTCGTTTAAAC	0		0		0
YBR270C	BIT2	2	728172	729809	-	CAATAAGCATAAGTGGCTAGGCGAGTCTTAAACTACAGAGTCAAGCAATG	GAAACCAAAGAATTATTGGTGAACTTCTTGAGGGCATACGCATGAGTATA	CACCTATGTATATGCCACTATTGTATATTACTAAATAAAATATTTAATTA	CAATAAGCATAAGTGGCTAGGCGAGTCTTAAACTACAGAGTCAAGCAATGCGGATCCCCGGGTTAATTAA	GAAACCAAAGAATTATTGGTGAACTTCTTGAGGGCATACGCATGAGTATACGGATCCCCGGGTTAATTAA	CACCTATGTATATGCCACTATTGTATATTACTAAATAAAATATTTAATTAGAATTCGAGCTCGTTTAAAC	0		0		0
YBR271W	YBR271W	2	730262	731521	+	AGTATCTAACTTATGCAAATTAGGAGTTCCATAGCGGATATTTCACTATG	TGGATGATTGGGGTGCCGTTAAGTATTTATATAGGCAAATCGTTCGCAAT	TATTATAAAGAAAAACTATTCGCCTAAGCGCGTTCGTTTCTTTCCCACTA	AGTATCTAACTTATGCAAATTAGGAGTTCCATAGCGGATATTTCACTATGCGGATCCCCGGGTTAATTAA	TGGATGATTGGGGTGCCGTTAAGTATTTATATAGGCAAATCGTTCGCAATCGGATCCCCGGGTTAATTAA	TATTATAAAGAAAAACTATTCGCCTAAGCGCGTTCGTTTCTTTCCCACTAGAATTCGAGCTCGTTTAAAC	0		0		0
YBR272C	HSM3	2	731771	733206	-	AAGTTTACACTATAATCACCGCAAAAGAACTCAGCGAAACAGGAGCAATG	GCAGTTAACGGAAAAAATTATTCCACAGGCAGTGAAACTAAGATTGCAGA	CATTAAACAATCAAGGCCGCCTTTATAGTTGCGCTTATGCAACATAATCA	AAGTTTACACTATAATCACCGCAAAAGAACTCAGCGAAACAGGAGCAATGCGGATCCCCGGGTTAATTAA	GCAGTTAACGGAAAAAATTATTCCACAGGCAGTGAAACTAAGATTGCAGACGGATCCCCGGGTTAATTAA	CATTAAACAATCAAGGCCGCCTTTATAGTTGCGCTTATGCAACATAATCAGAATTCGAGCTCGTTTAAAC	0		0		0
YBR273C	UBX7,CUI3	2	733463	734773	-	GCACTTACAAAGAAGCAAGGATAGCTAAACCAAACAGCCGTAACCAAATG	TTAATGGTAATAATGTCCATTTAGAAAAGAAAAAGGACGAAGATAAAGAA	ATTCACGTCTAATACTAGTCATAAATGGGGTTGAAGCCATTAACTACTTA	GCACTTACAAAGAAGCAAGGATAGCTAAACCAAACAGCCGTAACCAAATGCGGATCCCCGGGTTAATTAA	TTAATGGTAATAATGTCCATTTAGAAAAGAAAAAGGACGAAGATAAAGAACGGATCCCCGGGTTAATTAA	ATTCACGTCTAATACTAGTCATAAATGGGGTTGAAGCCATTAACTACTTAGAATTCGAGCTCGTTTAAAC	0		0		0
YBR274W	CHK1	2	734996	736579	+	AATAAGAGTATATCATAAGTTGCTGTATATGGGCAGCACGTATTACTATG	TGTTCAAGAAAATTTCAACTATCTGTAGGGATATTATCCTAATTCCCAAC	TTTTTTTTGATCAGTGCATCTTAACCCTTCTTTTGTCTCCATTTTTTTCA	AATAAGAGTATATCATAAGTTGCTGTATATGGGCAGCACGTATTACTATGCGGATCCCCGGGTTAATTAA	TGTTCAAGAAAATTTCAACTATCTGTAGGGATATTATCCTAATTCCCAACCGGATCCCCGGGTTAATTAA	TTTTTTTTGATCAGTGCATCTTAACCCTTCTTTTGTCTCCATTTTTTTCAGAATTCGAGCTCGTTTAAAC	0		0		0
YBR275C	RIF1	2	736757	742507	-	TTATTACAGGATTGCCATTGCAAAATCGTTTTTGTGGTCAATTTGCAATG	ATTTTATGATGAGGCTCGAATATTACTCAAACAGGGATAATGATATGAAT	ATTGTAATCAATTTATTGCCATTTTGATCTATTCTACATACTAACAATCA	TTATTACAGGATTGCCATTGCAAAATCGTTTTTGTGGTCAATTTGCAATGCGGATCCCCGGGTTAATTAA	ATTTTATGATGAGGCTCGAATATTACTCAAACAGGGATAATGATATGAATCGGATCCCCGGGTTAATTAA	ATTGTAATCAATTTATTGCCATTTTGATCTATTCTACATACTAACAATCAGAATTCGAGCTCGTTTAAAC	0		0		0
YBR276C	PPS1	2	743019	745442	-	TGTCATTGAGGTAGAAGGGGCGGGTATAGAAAACTAGAGCAACAACCATG	ATTGGCACATCATCTGTAGGGGTATCGCTGAGGTTAATATGAAGTACACA	ATTTTCCTACGTATTATACAGTTGTACGTATACTTATATAACAAAGTTCA	TGTCATTGAGGTAGAAGGGGCGGGTATAGAAAACTAGAGCAACAACCATGCGGATCCCCGGGTTAATTAA	ATTGGCACATCATCTGTAGGGGTATCGCTGAGGTTAATATGAAGTACACACGGATCCCCGGGTTAATTAA	ATTTTCCTACGTATTATACAGTTGTACGTATACTTATATAACAAAGTTCAGAATTCGAGCTCGTTTAAAC	0		0		0
YBR277C	YBR277C	2	745614	746015	-	ATTCAGGCTCTTCTATAACAACCTCTTGATCGCTCCGACCCGGTTGCATG	CTTGTTTTTATCTGTTGGGGCAGGCAGTTGTTAAGGCCATTAATTTCGCG	TTGCAATTATGTTTCCATGATGCTTTTGAAGTAATAATTTATTTTTATTA	ATTCAGGCTCTTCTATAACAACCTCTTGATCGCTCCGACCCGGTTGCATGCGGATCCCCGGGTTAATTAA	CTTGTTTTTATCTGTTGGGGCAGGCAGTTGTTAAGGCCATTAATTTCGCGCGGATCCCCGGGTTAATTAA	TTGCAATTATGTTTCCATGATGCTTTTGAAGTAATAATTTATTTTTATTAGAATTCGAGCTCGTTTAAAC	1	YBR278W	1	YBR278W	0
YBR278W	DPB3	2	745693	746298	+	GCCCCAACAGATAAAAACAAGCAAGGGTCAACCGTGTTGCAAAAAAAATG	ACTCCGACTCTTCTGATATCGAAGTTGACCATACGAAAAGCACCGATCCT	AACATATTGCATCGAATAGTAATTACATAGCAATAATAGCAACAACACTA	GCCCCAACAGATAAAAACAAGCAAGGGTCAACCGTGTTGCAAAAAAAATGCGGATCCCCGGGTTAATTAA	ACTCCGACTCTTCTGATATCGAAGTTGACCATACGAAAAGCACCGATCCTCGGATCCCCGGGTTAATTAA	AACATATTGCATCGAATAGTAATTACATAGCAATAATAGCAACAACACTAGAATTCGAGCTCGTTTAAAC	1	YBR277C	1	YBR277C	0
YBR279W	PAF1	2	746656	747993	+	GTATTCAGTACAATAGAACAGTGCTCATAATAGTATAAAGGGTCACAATG	TTCATACTGAACAAAAACCAGAGGAAGAAAAGGAAACTTTACAAGAAGAA	AAAAGAACTACAGGTTTAAAATCAATCTCCCTTCACTTCTCAATATTCTA	GTATTCAGTACAATAGAACAGTGCTCATAATAGTATAAAGGGTCACAATGCGGATCCCCGGGTTAATTAA	TTCATACTGAACAAAAACCAGAGGAAGAAAAGGAAACTTTACAAGAAGAACGGATCCCCGGGTTAATTAA	AAAAGAACTACAGGTTTAAAATCAATCTCCCTTCACTTCTCAATATTCTAGAATTCGAGCTCGTTTAAAC	0		0		0
YBR280C	SAF1	2	748183	750096	-	TTATTGTCCAAAGGATATACTCTCAATTATAAATGGAAAAGCACATCATG	GTGTAACTGCTGGTGGCTGGCAAACCGGTGCATTAATCATCAAGAAGCAT	CACCCAAACGGAATCCAAAATGCAAAATCGAAATGACACCTAAAAATTCA	TTATTGTCCAAAGGATATACTCTCAATTATAAATGGAAAAGCACATCATGCGGATCCCCGGGTTAATTAA	GTGTAACTGCTGGTGGCTGGCAAACCGGTGCATTAATCATCAAGAAGCATCGGATCCCCGGGTTAATTAA	CACCCAAACGGAATCCAAAATGCAAAATCGAAATGACACCTAAAAATTCAGAATTCGAGCTCGTTTAAAC	0		0		0
YBR281C	DUG2	2	750369	753005	-	CCCTGTAAGGAAAAGTGAAAAACGAGGGCAGAAGTAATTGTGAAATCATG	AAAATTGGTCTAATTTGACTGAGATTTTGTCTAAAGTATTCAATAGGTTA	AAATTGGGTATATATTAAGCACTTTAAAATCAATTGTTTGTAGTTGTTTA	CCCTGTAAGGAAAAGTGAAAAACGAGGGCAGAAGTAATTGTGAAATCATGCGGATCCCCGGGTTAATTAA	AAAATTGGTCTAATTTGACTGAGATTTTGTCTAAAGTATTCAATAGGTTACGGATCCCCGGGTTAATTAA	AAATTGGGTATATATTAAGCACTTTAAAATCAATTGTTTGTAGTTGTTTAGAATTCGAGCTCGTTTAAAC	0		0		0
YBR282W	MRPL27	2	753638	754078	+	ATGAGAATCAAAGATTAGCTTAAAAGTGAGGACAGCAAATAACTAAAATG	GGGTACAAAGCGAAGGGGCCACCGACACTTCATGTTATAAGGAGCGTGGA	TCGAAAACTAGTATTTACACGCATATTGAAGAAAGATTATAAATAACTTA	ATGAGAATCAAAGATTAGCTTAAAAGTGAGGACAGCAAATAACTAAAATGCGGATCCCCGGGTTAATTAA	GGGTACAAAGCGAAGGGGCCACCGACACTTCATGTTATAAGGAGCGTGGACGGATCCCCGGGTTAATTAA	TCGAAAACTAGTATTTACACGCATATTGAAGAAAGATTATAAATAACTTAGAATTCGAGCTCGTTTAAAC	0		0		0
YBR283C	SSH1	2	754341	755813	-	ACGCATTTTTTAGCACATTTGCCCCCGCCACTCTCCATTGTTTTAGTATG	GTGGCGGTCAAAGTGCTTTGAATCAAGTCTTGGGTGTTCCAGGTGCTATG	AATTTGATCTTCTTTTTTGTTTTCCTTCTTTTTTTTCTTTTCTTTGTTTA	ACGCATTTTTTAGCACATTTGCCCCCGCCACTCTCCATTGTTTTAGTATGCGGATCCCCGGGTTAATTAA	GTGGCGGTCAAAGTGCTTTGAATCAAGTCTTGGGTGTTCCAGGTGCTATGCGGATCCCCGGGTTAATTAA	AATTTGATCTTCTTTTTTGTTTTCCTTCTTTTTTTTCTTTTCTTTGTTTAGAATTCGAGCTCGTTTAAAC	0		0		0
YBR284W	YBR284W	2	756637	759030	+	GTAAATAGTACAGGAAAAGGAGGACTTATCAGGGTATCACACAAACAATG	GTCAATATCGCAGTAGCACTCTCGCAGGGGAGTGGCGACTCATAATTGCG	TAATATTAGCGTCACAATATGCGCCCCTCGAAGAAACATGAGCGAATTCA	GTAAATAGTACAGGAAAAGGAGGACTTATCAGGGTATCACACAAACAATGCGGATCCCCGGGTTAATTAA	GTCAATATCGCAGTAGCACTCTCGCAGGGGAGTGGCGACTCATAATTGCGCGGATCCCCGGGTTAATTAA	TAATATTAGCGTCACAATATGCGCCCCTCGAAGAAACATGAGCGAATTCAGAATTCGAGCTCGTTTAAAC	0		0		0
YBR285W	YBR285W	2	759321	759755	+	TTTATAACATAACAATTCGAAATCTCTAAGCTCGCTTATAGTTGACAATG	GCAGAATACTAAAGTGTAGCACTAGAAGGAGCTACTTGAGATACAAGAAA	AAGAAAGGTGATTATATCAAGATATATAATGAAGCAGCTCAATTGTCTTA	TTTATAACATAACAATTCGAAATCTCTAAGCTCGCTTATAGTTGACAATGCGGATCCCCGGGTTAATTAA	GCAGAATACTAAAGTGTAGCACTAGAAGGAGCTACTTGAGATACAAGAAACGGATCCCCGGGTTAATTAA	AAGAAAGGTGATTATATCAAGATATATAATGAAGCAGCTCAATTGTCTTAGAATTCGAGCTCGTTTAAAC	0		0		0
YBR286W	APE3,APY1	2	760098	761711	+	CAATTGGTAGAAGAAGCCAAAAAAAAAAAAAAACAGAAACGCCAACCATG	TGAATGCTCAACAACCACAATTTAAGTACAGGGCCGACTTCTTGATTATT	TTTTCTTTTAGATAATTATACAGAAATACTTGATGTGAACAGTACACTTA	CAATTGGTAGAAGAAGCCAAAAAAAAAAAAAAACAGAAACGCCAACCATGCGGATCCCCGGGTTAATTAA	TGAATGCTCAACAACCACAATTTAAGTACAGGGCCGACTTCTTGATTATTCGGATCCCCGGGTTAATTAA	TTTTCTTTTAGATAATTATACAGAAATACTTGATGTGAACAGTACACTTAGAATTCGAGCTCGTTTAAAC	0		0		0
YBR287W	ZSP1	2	761969	763252	+	ATTCCCAACTAACCATACCCTCATAGATTACTCTGCATTTCTACTATATG	TTATTGTTGTCTCAGGTGCAATTTACGTTTTACAGTGGGCTAACCCAACT	AAGACTTTCATTCATGAAGACTCTATACAAAGGAATGAAAAGTTGTATTA	ATTCCCAACTAACCATACCCTCATAGATTACTCTGCATTTCTACTATATGCGGATCCCCGGGTTAATTAA	TTATTGTTGTCTCAGGTGCAATTTACGTTTTACAGTGGGCTAACCCAACTCGGATCCCCGGGTTAATTAA	AAGACTTTCATTCATGAAGACTCTATACAAAGGAATGAAAAGTTGTATTAGAATTCGAGCTCGTTTAAAC	0		0		0
YBR288C	APM3,YKS6	2	763410	764861	-	TTGGGCAACAACAGAGGCTGTAAACCTTACCAACCCAACCAAAATAGATG	ACAAGGGTGCAAAGTATAAGACCCAGACAGGCAATTTTCAAGTAAGGCTG	CATTATATTCTATTTAGTTTCGCATGGAATTTCAAGTACACATATAACTA	TTGGGCAACAACAGAGGCTGTAAACCTTACCAACCCAACCAAAATAGATGCGGATCCCCGGGTTAATTAA	ACAAGGGTGCAAAGTATAAGACCCAGACAGGCAATTTTCAAGTAAGGCTGCGGATCCCCGGGTTAATTAA	CATTATATTCTATTTAGTTTCGCATGGAATTTCAAGTACACATATAACTAGAATTCGAGCTCGTTTAAAC	0		0		0
YBR289W	SNF5,TYE4,SWI10,HAF4	2	765065	767785	+	AAGCATCATCAAGGGAACATATAGTAAAGAACTACACAAAAGCAACAATG	TGTTGACTAATAGCAATAATGGTAGCAGTAACAATAATACACAGAATACA	ACGGTTATTTACATCTCCGGTATATTTTATATATGTGTATATATTTTCTA	AAGCATCATCAAGGGAACATATAGTAAAGAACTACACAAAAGCAACAATGCGGATCCCCGGGTTAATTAA	TGTTGACTAATAGCAATAATGGTAGCAGTAACAATAATACACAGAATACACGGATCCCCGGGTTAATTAA	ACGGTTATTTACATCTCCGGTATATTTTATATATGTGTATATATTTTCTAGAATTCGAGCTCGTTTAAAC	0		0		0
YBR290W	BSD2	2	767992	768957	+	AAGAGCATGAGAATAACAAGAACACGTAGTCTAGGAAACTAAGCGCTATG	AAGTCAAAAAATTGGAAAAGAAATACCTCAACCAAAGTCAAAATCAAGCA	ACTTAAAAAAGTTATATATCTCTTTTTATCATAATGAAGAAGATGGCTTA	AAGAGCATGAGAATAACAAGAACACGTAGTCTAGGAAACTAAGCGCTATGCGGATCCCCGGGTTAATTAA	AAGTCAAAAAATTGGAAAAGAAATACCTCAACCAAAGTCAAAATCAAGCACGGATCCCCGGGTTAATTAA	ACTTAAAAAAGTTATATATCTCTTTTTATCATAATGAAGAAGATGGCTTAGAATTCGAGCTCGTTTAAAC	0		0		0
YBR291C	CTP1	2	769074	769973	-	GAAAGAACTCCAAAGTAGAACTTGAATTATAAATTAGCATTTTACCGATG	GTGGTGGTATTGTTTTCACTATCTATGAAAAGGTCTTAGTTATGCTAGCC	TAACGAGTAGAAAACATTAGATGATATATTGTACACAATAATACATTTCA	GAAAGAACTCCAAAGTAGAACTTGAATTATAAATTAGCATTTTACCGATGCGGATCCCCGGGTTAATTAA	GTGGTGGTATTGTTTTCACTATCTATGAAAAGGTCTTAGTTATGCTAGCCCGGATCCCCGGGTTAATTAA	TAACGAGTAGAAAACATTAGATGATATATTGTACACAATAATACATTTCAGAATTCGAGCTCGTTTAAAC	0		0		0
YBR292C	YBR292C	2	770103	770474	-	TGCAATAACTCTTCTTACTAAGAGGTAACTTACATCTTGACTTTTTAATG	CTGCGGAATTTTCAATTATTAGAAGTGAAAAAAAAAAAAAAGAAGAACAA	CTTCGACATTTTACGTTTTATATATCACGCTAAAGTGAGACTAAATTTCA	TGCAATAACTCTTCTTACTAAGAGGTAACTTACATCTTGACTTTTTAATGCGGATCCCCGGGTTAATTAA	CTGCGGAATTTTCAATTATTAGAAGTGAAAAAAAAAAAAAAGAAGAACAACGGATCCCCGGGTTAATTAA	CTTCGACATTTTACGTTTTATATATCACGCTAAAGTGAGACTAAATTTCAGAATTCGAGCTCGTTTAAAC	0		0		0
YBR293W	VBA2	2	772409	773833	+	CCGTTACAGCTTCGACGTACCAAACGATTGGTAACGAATTTAATCAGATG	TGATACTCTGCATCCTTAAAGACAATCTGGCGAAACCTAAAACAAGAAGA	CTGTTAATGTATCAATTGAGTCGGTCAAGGGCATAGGTATATATTGTTTA	CCGTTACAGCTTCGACGTACCAAACGATTGGTAACGAATTTAATCAGATGCGGATCCCCGGGTTAATTAA	TGATACTCTGCATCCTTAAAGACAATCTGGCGAAACCTAAAACAAGAAGACGGATCCCCGGGTTAATTAA	CTGTTAATGTATCAATTGAGTCGGTCAAGGGCATAGGTATATATTGTTTAGAATTCGAGCTCGTTTAAAC	0		0		0
YBR294W	SUL1,SFP2	2	774640	777219	+	TAGCTTTAAAAATAAAAATAAATCCCTGCAGAATACTCGGAAAGAATATG	ATTTACCGTTTTTTCATATCGATATACCCGATTTTTCTAAATGGGACGTT	ATAACTAAAAACAGGGGGGGTAATTAAAGTACTTACTATCTACTACACTA	TAGCTTTAAAAATAAAAATAAATCCCTGCAGAATACTCGGAAAGAATATGCGGATCCCCGGGTTAATTAA	ATTTACCGTTTTTTCATATCGATATACCCGATTTTTCTAAATGGGACGTTCGGATCCCCGGGTTAATTAA	ATAACTAAAAACAGGGGGGGTAATTAAAGTACTTACTATCTACTACACTAGAATTCGAGCTCGTTTAAAC	0		0		0
YBR295W	PCA1,PAY2,CAD2	2	778254	781904	+	TGCTTCCAGGATTTATACAATGAAAGAGCCCAAAGCTGCTGATAACGATG	GTATCCTCCCTGTAATTTTTGTAGCTATACTTCTGCGTTATGCAAAGATT	AGAAAAGAAAAAAGAAAATCTACAATCAAATAGCAGCAGTACCTGGACTA	TGCTTCCAGGATTTATACAATGAAAGAGCCCAAAGCTGCTGATAACGATGCGGATCCCCGGGTTAATTAA	GTATCCTCCCTGTAATTTTTGTAGCTATACTTCTGCGTTATGCAAAGATTCGGATCCCCGGGTTAATTAA	AGAAAAGAAAAAAGAAAATCTACAATCAAATAGCAGCAGTACCTGGACTAGAATTCGAGCTCGTTTAAAC	0		0		0
YBR296C	PHO89,ITN1	2	782203	783927	-	ACTGGAGCGTATCTAATCGAATCAATATAAACAAAGATTAAGCAAAAATG	ATGGTATCATTTTGAATGCTCCTCGCTTTGGTGTGGAATACCAAATGACA	TCTACCTAATGTTGTAAAACTGTATTCATAACCGAAACACATTATGATTA	ACTGGAGCGTATCTAATCGAATCAATATAAACAAAGATTAAGCAAAAATGCGGATCCCCGGGTTAATTAA	ATGGTATCATTTTGAATGCTCCTCGCTTTGGTGTGGAATACCAAATGACACGGATCCCCGGGTTAATTAA	TCTACCTAATGTTGTAAAACTGTATTCATAACCGAAACACATTATGATTAGAATTCGAGCTCGTTTAAAC	0		0		0
YBR296C-A	YBR296C-A	2	785528	785647	-	CTGGGGAATTTATTTTTCAAGATTTGGTTCCAGGTTTTTCCCCAGAAATG	CCATTTCCTTGTCAACTCTGTCTTATATCAGAGTCCATAAACTAGTAAAA	GTTTGTGAAAAAAATTTTATGGTGAGATATTGTTCGATTTTACGAAGTCA	CTGGGGAATTTATTTTTCAAGATTTGGTTCCAGGTTTTTCCCCAGAAATGCGGATCCCCGGGTTAATTAA	CCATTTCCTTGTCAACTCTGTCTTATATCAGAGTCCATAAACTAGTAAAACGGATCCCCGGGTTAATTAA	GTTTGTGAAAAAAATTTTATGGTGAGATATTGTTCGATTTTACGAAGTCAGAATTCGAGCTCGTTTAAAC	0		0		0
YBR297W	MAL33,MALR,MAL3R	2	785928	787334	+	TATCAAACATCGAACGAGAGCATCTTGAAGATATTTATGTTCTAAATATG	GACCACTGCGCCTAAATGATGATTCCAAAGATGAAGACGACATAATTCCT	TCTATCAGTATATCTATCTCGTATAAGTGAACGGCGTGAACAATAAATTA	TATCAAACATCGAACGAGAGCATCTTGAAGATATTTATGTTCTAAATATGCGGATCCCCGGGTTAATTAA	GACCACTGCGCCTAAATGATGATTCCAAAGATGAAGACGACATAATTCCTCGGATCCCCGGGTTAATTAA	TCTATCAGTATATCTATCTCGTATAAGTGAACGGCGTGAACAATAAATTAGAATTCGAGCTCGTTTAAAC	0		0		0
YBR298C	MAL31,MALT,MAL3T	2	788034	789878	-	GTATTCAGTATAACAATAAGAATTACATCCAAGACTATTAATTAACTATG	AAACTTCTGTGGTAGATGAAGGGCGAAGCACCTCATCTGTTGTGAACAAA	ATAAAATAAAATTAAATAACGCCGTATCTACCTACTGGCTAAAAAAATCA	GTATTCAGTATAACAATAAGAATTACATCCAAGACTATTAATTAACTATGCGGATCCCCGGGTTAATTAA	AAACTTCTGTGGTAGATGAAGGGCGAAGCACCTCATCTGTTGTGAACAAACGGATCCCCGGGTTAATTAA	ATAAAATAAAATTAAATAACGCCGTATCTACCTACTGGCTAAAAAAATCAGAATTCGAGCTCGTTTAAAC	0		0		0
YBR298C-A	YBR298C-A	2	790438	790659	-	AAAAACTGCTTAAGAGATGGATGATTTAATTTTTTAGAGACGTATTAATG	CACTCTTCGAGCCAATTCTTAATTGTGTGGGGTCCGCGAAAACTTCCGGA	GTTGAAAATTTCGCTAAACACGGGGTTTAAGTTAAAGTTTACAGGATTTA	AAAAACTGCTTAAGAGATGGATGATTTAATTTTTTAGAGACGTATTAATGCGGATCCCCGGGTTAATTAA	CACTCTTCGAGCCAATTCTTAATTGTGTGGGGTCCGCGAAAACTTCCGGACGGATCCCCGGGTTAATTAA	GTTGAAAATTTCGCTAAACACGGGGTTTAAGTTAAAGTTTACAGGATTTAGAATTCGAGCTCGTTTAAAC	0		0		0
YBR299W	MAL32,MALS,MAL3S	2	790754	792508	+	TTGATAATCTCAAATGTACATCAGTCAAGCATAACTAAATTACATAAATG	TTTCCTCCAGAGTTTTGAAACCATGGGAAGGTAGAATCTACCTCGTCAAA	TCTGTTATTTCGTTAAAGTACGCGCTAAAAAAAAGTCGGCACTAATTTTA	TTGATAATCTCAAATGTACATCAGTCAAGCATAACTAAATTACATAAATGCGGATCCCCGGGTTAATTAA	TTTCCTCCAGAGTTTTGAAACCATGGGAAGGTAGAATCTACCTCGTCAAACGGATCCCCGGGTTAATTAA	TCTGTTATTTCGTTAAAGTACGCGCTAAAAAAAAGTCGGCACTAATTTTAGAATTCGAGCTCGTTTAAAC	0		0		0
YBR300C	YBR300C	2	794003	794500	-	TTTCGTCAGATTGAGCTAGAGTGGTGGTTGCGGAAGCAGTAGCAGCGATG	ACCAAATTTGCTTTGAACCCTCGTTAAGAGGCCACCTAATCTTTGTGCTC	TTCTATTTTAAGAAAAACAGAATCGACAATTTTCCCGTAGCAACCGTTTA	TTTCGTCAGATTGAGCTAGAGTGGTGGTTGCGGAAGCAGTAGCAGCGATGCGGATCCCCGGGTTAATTAA	ACCAAATTTGCTTTGAACCCTCGTTAAGAGGCCACCTAATCTTTGTGCTCCGGATCCCCGGGTTAATTAA	TTCTATTTTAAGAAAAACAGAATCGACAATTTTCCCGTAGCAACCGTTTAGAATTCGAGCTCGTTTAAAC	1	YBR301W	1	YBR301W	0
YBR301W	DAN3	2	794460	794822	+	TATTTCTTGTTAAGCTTACATCAGCACTAAAAAACAAAACAAATACAATG	CAGCTATCTCCAAGGCTCTATCCAAGGACGGTATCTACACTATCGCAAAC	GTTATTTCTTAAGGTTTATGGATTTTCATTCGTAAAGGCATCACTCCCTA	TATTTCTTGTTAAGCTTACATCAGCACTAAAAAACAAAACAAATACAATGCGGATCCCCGGGTTAATTAA	CAGCTATCTCCAAGGCTCTATCCAAGGACGGTATCTACACTATCGCAAACCGGATCCCCGGGTTAATTAA	GTTATTTCTTAAGGTTTATGGATTTTCATTCGTAAAGGCATCACTCCCTAGAATTCGAGCTCGTTTAAAC	1	YBR300C	1	YBR300C	0
YBR302C	COS2	2	795744	796883	-	ACTATCTCGAATAAAAAACCCCTCGAACTGCCATCTCACTACCGAAAATG	GGCCATACATTAAAGAAGCGCAATTATCCTGCAGTGAGGAGTCCTTAGCG	AGCTGACAAACTACAAAATATATAAATTGAAAAAGTTGTATTTATCTTTA	ACTATCTCGAATAAAAAACCCCTCGAACTGCCATCTCACTACCGAAAATGCGGATCCCCGGGTTAATTAA	GGCCATACATTAAAGAAGCGCAATTATCCTGCAGTGAGGAGTCCTTAGCGCGGATCCCCGGGTTAATTAA	AGCTGACAAACTACAAAATATATAAATTGAAAAAGTTGTATTTATCTTTAGAATTCGAGCTCGTTTAAAC	0		0		0
YCL076W	YCL076W	3	1604	2347	+	ATTACATTTACATGACATATAGGAAGGTCCAATAAACTTACTACATTATG	TTGCACAAGACAGAAGAAACTATCAAAAGAAAGGAAATAAGGGATGTATA	TCGTTTAAGCAGAGAACAGTTGCTTATGCGATGATCAGCTCCGTAAATTA	ATTACATTTACATGACATATAGGAAGGTCCAATAAACTTACTACATTATGCGGATCCCCGGGTTAATTAA	TTGCACAAGACAGAAGAAACTATCAAAAGAAAGGAAATAAGGGATGTATACGGATCCCCGGGTTAATTAA	TCGTTTAAGCAGAGAACAGTTGCTTATGCGATGATCAGCTCCGTAAATTAGAATTCGAGCTCGTTTAAAC	1	YCL075W	1	YCL075W	0
YCL075W	YCL075W	3	2338	2778	+	TTGGTTGCACAAGACAGAAGAAACTATCAAAAGAAAGGAAATAAGGGATG	TACATGACGTATCTTACGTTCCTGATTTACCAGTTAACCTGATATCCGTT	CCCTCTTTTGTGAACGTAACAGAAGAGTTTGATTTAGTGCATAGTTTTCA	TTGGTTGCACAAGACAGAAGAAACTATCAAAAGAAAGGAAATAAGGGATGCGGATCCCCGGGTTAATTAA	TACATGACGTATCTTACGTTCCTGATTTACCAGTTAACCTGATATCCGTTCGGATCCCCGGGTTAATTAA	CCCTCTTTTGTGAACGTAACAGAAGAGTTTGATTTAGTGCATAGTTTTCAGAATTCGAGCTCGTTTAAAC	1	YCL076W	1	YCL076W	0
YCL074W	YCL074W	3	3036	3962	+	GATTATTTCTGGCCCTTGCTAGCTGCCTCAAACTAATAGTATATCAGATG	CATCTACTGAGGCAGAATACATTACTGCAAGTGAAACTGTCATGGAGATA	GATGAGATAAGTGGCTGGCCTAAGTGTTCAAACAAGTTTTGAATCCATTA	GATTATTTCTGGCCCTTGCTAGCTGCCTCAAACTAATAGTATATCAGATGCGGATCCCCGGGTTAATTAA	CATCTACTGAGGCAGAATACATTACTGCAAGTGAAACTGTCATGGAGATACGGATCCCCGGGTTAATTAA	GATGAGATAAGTGGCTGGCCTAAGTGTTCAAACAAGTTTTGAATCCATTAGAATTCGAGCTCGTTTAAAC	0		0		0
YCL073C	YCL073C	3	6691	8538	-	CGAGAAAAAAAAAAAAAAAAAGAATAATCAAGTAAATAAATTATCGGATG	AAATCAAGGCACTTTTTAGACATAATCGAAGTAACAAGAAATCAGGATGT	TGATTTTGCTTTCATTTTTTTTTGCCCTTTTTTCACCAGCTTGGGGATCA	CGAGAAAAAAAAAAAAAAAAAGAATAATCAAGTAAATAAATTATCGGATGCGGATCCCCGGGTTAATTAA	AAATCAAGGCACTTTTTAGACATAATCGAAGTAACAAGAAATCAGGATGTCGGATCCCCGGGTTAATTAA	TGATTTTGCTTTCATTTTTTTTTGCCCTTTTTTCACCAGCTTGGGGATCAGAATTCGAGCTCGTTTAAAC	0		0		0
YCL069W	VBA3	3	9918	11294	+	TACTTATTTTTGAAGCCGGATCCCTAATTGCTGCCCTTGCCTCTTCAATG	TAATCATACCAAAAAAGGACGAGACACCAGAAGATAATTTAGAAGACAAG	TGTATAAAAGGCGAAAAAAATAAAATGAAAATAAGAAAATAACTGCGCTA	TACTTATTTTTGAAGCCGGATCCCTAATTGCTGCCCTTGCCTCTTCAATGCGGATCCCCGGGTTAATTAA	TAATCATACCAAAAAAGGACGAGACACCAGAAGATAATTTAGAAGACAAGCGGATCCCCGGGTTAATTAA	TGTATAAAAGGCGAAAAAAATAAAATGAAAATAAGAAAATAACTGCGCTAGAATTCGAGCTCGTTTAAAC	0		0		0
YCL068C	YCL068C	3	11715	12497	-	TCGCAAAAATACATAAACAATCAACCCTCTCCTCAGACACTACTAAGATG	TTAATAAAAACAAACACAAAAATCACTCCGTCCCTCGTCTAATACAAGTT	GCGCACATAGAATGAAATGTAAACAAAGATTTCAGAAAAATCGTCATTCA	TCGCAAAAATACATAAACAATCAACCCTCTCCTCAGACACTACTAAGATGCGGATCCCCGGGTTAATTAA	TTAATAAAAACAAACACAAAAATCACTCCGTCCCTCGTCTAATACAAGTTCGGATCCCCGGGTTAATTAA	GCGCACATAGAATGAAATGTAAACAAAGATTTCAGAAAAATCGTCATTCAGAATTCGAGCTCGTTTAAAC	0		0		0
YCL067C	HMLALPHA2,ALPHA2	3	12598	13230	-	ATCAGCTTAGAAGTGGGCAAGAAAAAAAGGAAGATAAGCAAGAAAAAATG	CAGAATTAGCGGACCTCTTGAGCGGTGAGCCTCTGGCAAAGAAGAAAGAA	TATATATATATATTCTACACAGATATATACATATTTGTTTTTCGGGCTCA	ATCAGCTTAGAAGTGGGCAAGAAAAAAAGGAAGATAAGCAAGAAAAAATGCGGATCCCCGGGTTAATTAA	CAGAATTAGCGGACCTCTTGAGCGGTGAGCCTCTGGCAAAGAAGAAAGAACGGATCCCCGGGTTAATTAA	TATATATATATATTCTACACAGATATATACATATTTGTTTTTCGGGCTCAGAATTCGAGCTCGTTTAAAC	0		0		0
YCL066W	HMLALPHA1,ALPHA1	3	13494	14021	+	GAAATGTATCAACCATATATAATAACTTAATAGACGACATTCACAATATG	AAGTACGTGGTGACGGATATTGGGAAGATGTGTTTGTACATTTGGCCTTA	CAACATTCAGTACTCGAAAGATAAACAACCTCCGCCACGACCACACTCTA	GAAATGTATCAACCATATATAATAACTTAATAGACGACATTCACAATATGCGGATCCCCGGGTTAATTAA	AAGTACGTGGTGACGGATATTGGGAAGATGTGTTTGTACATTTGGCCTTACGGATCCCCGGGTTAATTAA	CAACATTCAGTACTCGAAAGATAAACAACCTCCGCCACGACCACACTCTAGAATTCGAGCTCGTTTAAAC	1	YCL065W	1	YCL065W	0
YCL065W	YCL065W	3	13963	14331	+	TTTTATAAACCCTGGTTTTGGTTTTGTAGAGTGGTTGACGAATAATTATG	TTGCATTGTCTATATACTGTATTTACCAAATCTTAATTTTAGTCAAACAT	ATTTTCCCAAGGCTTAGTATACACATCATTAAATACGAAAGTAAACATTA	TTTTATAAACCCTGGTTTTGGTTTTGTAGAGTGGTTGACGAATAATTATGCGGATCCCCGGGTTAATTAA	TTGCATTGTCTATATACTGTATTTACCAAATCTTAATTTTAGTCAAACATCGGATCCCCGGGTTAATTAA	ATTTTCCCAAGGCTTAGTATACACATCATTAAATACGAAAGTAAACATTAGAATTCGAGCTCGTTTAAAC	1	YCL066W	1	YCL066W	0
YCL064C	CHA1	3	16010	17092	-	TTTTTTAAGTGCTGGATAGACAAGAGACAGGAAAATTAACCAGCGAGATG	CTGACAATTTCATATTTCCAGAAAAAAATATTGTGAATTTAAAAAGTGCT	AATTATCAAGGGCAAATTGATGCTTCAACGAAAAAGTTATTGGATTTTCA	TTTTTTAAGTGCTGGATAGACAAGAGACAGGAAAATTAACCAGCGAGATGCGGATCCCCGGGTTAATTAA	CTGACAATTTCATATTTCCAGAAAAAAATATTGTGAATTTAAAAAGTGCTCGGATCCCCGGGTTAATTAA	AATTATCAAGGGCAAATTGATGCTTCAACGAAAAAGTTATTGGATTTTCAGAATTCGAGCTCGTTTAAAC	0		0		0
YCL063W	VAC17,YCL062W	3	17502	18773	+	GATAGATAAGAAACAGCTCGCATAAGGAAACAAGGACACATCGATTAATG	GCGTCTCTATAGAAGAATTGCAAGATGCTTTGAATACAGAACTGCTGTTT	AAACATTTGGAGCAAAAGAAGAGTAGGTTAGGTAAAGGAGGCATTAATTA	GATAGATAAGAAACAGCTCGCATAAGGAAACAAGGACACATCGATTAATGCGGATCCCCGGGTTAATTAA	GCGTCTCTATAGAAGAATTGCAAGATGCTTTGAATACAGAACTGCTGTTTCGGATCCCCGGGTTAATTAA	AAACATTTGGAGCAAAAGAAGAGTAGGTTAGGTAAAGGAGGCATTAATTAGAATTCGAGCTCGTTTAAAC	0		0		0
YCL061C	MRC1,YCL060C	3	19028	22318	-	AGGAAGTTCGTTATTCGCTTTTGAACTTATCACCAAATATTTTAGTGATG	AAACAAAATCGAATAAACTTTTTGAAAGCGGACAAGATAGCTTTGATAAT	ACAGCTTCTGGAGTTCAATCAACTTCTTCGGAAAAGATAAAAAACCACTA	AGGAAGTTCGTTATTCGCTTTTGAACTTATCACCAAATATTTTAGTGATGCGGATCCCCGGGTTAATTAA	AAACAAAATCGAATAAACTTTTTGAAAGCGGACAAGATAGCTTTGATAATCGGATCCCCGGGTTAATTAA	ACAGCTTCTGGAGTTCAATCAACTTCTTCGGAAAAGATAAAAAACCACTAGAATTCGAGCTCGTTTAAAC	0		0		0
YCL059C	KRR1	3	22641	23591	-	GTAGACAGCAAACAAAAGGGTCACACAAATATCCAAATTGGCAAACGATG	CAAAAGATTTCATAGCTCCGGAAGAAGAAGCATACAAGCCAAACCAAAAT	TTCTATATATATATAGACATATATGAAGGATTCCGTAGCGGTGTAAACTA	GTAGACAGCAAACAAAAGGGTCACACAAATATCCAAATTGGCAAACGATGCGGATCCCCGGGTTAATTAA	CAAAAGATTTCATAGCTCCGGAAGAAGAAGCATACAAGCCAAACCAAAATCGGATCCCCGGGTTAATTAA	TTCTATATATATATAGACATATATGAAGGATTCCGTAGCGGTGTAAACTAGAATTCGAGCTCGTTTAAAC	0		0		0
YCL058C	FYV5	3	23735	24193	-	TAAGCGACGATGCTTTATATATATTCAAAAAAAAAAATAATAAAAATATG	TGCTAAATGCCCTTGAGTTATTGTACCTTATTATAGCAGGCTTGCACATC	TCATCGCTAAAAGAATTAGAAATATAAGGAAAAAAAAATTTTCGTTTTCA	TAAGCGACGATGCTTTATATATATTCAAAAAAAAAAATAATAAAAATATGCGGATCCCCGGGTTAATTAA	TGCTAAATGCCCTTGAGTTATTGTACCTTATTATAGCAGGCTTGCACATCCGGATCCCCGGGTTAATTAA	TCATCGCTAAAAGAATTAGAAATATAAGGAAAAAAAAATTTTCGTTTTCAGAATTCGAGCTCGTTTAAAC	1	YCL058W-A	1	YCL058W-A	0
YCL058W-A	YCL058W-A	3	23796	24137	+	CTGCTATAATAAGGTACAATAACTCAAGGGCATTTAGCAAGGAAAAAATG	CAAACGACAGCATGCTGAAGCAGATCGAAATGATATCCGGCTTTTCCTTA	CATTCCGCTCTATATGTATATATTTACGTAACTTTCACCACTATTCCCTA	CTGCTATAATAAGGTACAATAACTCAAGGGCATTTAGCAAGGAAAAAATGCGGATCCCCGGGTTAATTAA	CAAACGACAGCATGCTGAAGCAGATCGAAATGATATCCGGCTTTTCCTTACGGATCCCCGGGTTAATTAA	CATTCCGCTCTATATGTATATATTTACGTAACTTTCACCACTATTCCCTAGAATTCGAGCTCGTTTAAAC	1	YCL058C	1	YCL058C	0
YCL057C-A	YCL057C-A	3	24244	24537	-	AACTTTGCTACGAGAGGGAATAAACACGGAAAAAGACAAAATATACCATG	AGGGCGACGCCATCTTTAGATCCAGCGCTGGCCTCAGATCCTCGAAGGTT	TTTATTATTTTTTTTTTTGAATATATATAAAGCATCGTCGCTTAAGACTA	AACTTTGCTACGAGAGGGAATAAACACGGAAAAAGACAAAATATACCATGCGGATCCCCGGGTTAATTAA	AGGGCGACGCCATCTTTAGATCCAGCGCTGGCCTCAGATCCTCGAAGGTTCGGATCCCCGGGTTAATTAA	TTTATTATTTTTTTTTTTGAATATATATAAAGCATCGTCGCTTAAGACTAGAATTCGAGCTCGTTTAAAC	0		0		0
YCL057W	PRD1	3	24980	27118	+	GAAGGAATGGTTGGATTTGAGTTTAAAAATAGAGGGAATACTTGGAGATG	GTAGGGAACCTTCTAAGGATGCTTTCTTGAAGGAGCTGGGCTTACAGAAC	TAATAACACTTTGTAGAATAATTGTATAATTTTATGCTTGAACGAATTTA	GAAGGAATGGTTGGATTTGAGTTTAAAAATAGAGGGAATACTTGGAGATGCGGATCCCCGGGTTAATTAA	GTAGGGAACCTTCTAAGGATGCTTTCTTGAAGGAGCTGGGCTTACAGAACCGGATCCCCGGGTTAATTAA	TAATAACACTTTGTAGAATAATTGTATAATTTTATGCTTGAACGAATTTAGAATTCGAGCTCGTTTAAAC	0		0		0
YCL056C	YCL056C	3	27137	27571	-	GTAAAGAGGAGATGAATAAAAGTAAAGGAAGAAGAAAAGAAAGTTGAATG	GGTTATTTAAAAGATTATCTAACATAATAACACTTTGTAGAATAATTGTA	TCTTGAAGGAGCTGGGCTTACAGAACTAAATTCGTTCAAGCATAAAATTA	GTAAAGAGGAGATGAATAAAAGTAAAGGAAGAAGAAAAGAAAGTTGAATGCGGATCCCCGGGTTAATTAA	GGTTATTTAAAAGATTATCTAACATAATAACACTTTGTAGAATAATTGTACGGATCCCCGGGTTAATTAA	TCTTGAAGGAGCTGGGCTTACAGAACTAAATTCGTTCAAGCATAAAATTAGAATTCGAGCTCGTTTAAAC	0		0		0
YCL055W	KAR4	3	28136	29143	+	GTAGAACAGCCATTATAAAACAAAAGAGAAGTGAGAATACTATTAAGATG	AAAATGAGATTGAGCTGTTAAGACCAAGAAGTCCAGTACAAAAAGCACAA	TACTAGTATATTTAATTGAGCTAAGCAAGGATTTATGTGTTGATGCTTTA	GTAGAACAGCCATTATAAAACAAAAGAGAAGTGAGAATACTATTAAGATGCGGATCCCCGGGTTAATTAA	AAAATGAGATTGAGCTGTTAAGACCAAGAAGTCCAGTACAAAAAGCACAACGGATCCCCGGGTTAATTAA	TACTAGTATATTTAATTGAGCTAAGCAAGGATTTATGTGTTGATGCTTTAGAATTCGAGCTCGTTTAAAC	0		0		0
YCL054W	SPB1	3	31656	34181	+	GCTTCAGTTTGTAGTTAGATTTAACTCAATAGAGGTGATTGGCAAAAATG	ATGAACAAAGAGCCCTAAGACGTATCGCAAAGAAGCATCACAAGAAAAAG	TATTTTCAATATTGTACAAGGGAATGGAAAAATAATGCTCTTTGTTACTA	GCTTCAGTTTGTAGTTAGATTTAACTCAATAGAGGTGATTGGCAAAAATGCGGATCCCCGGGTTAATTAA	ATGAACAAAGAGCCCTAAGACGTATCGCAAAGAAGCATCACAAGAAAAAGCGGATCCCCGGGTTAATTAA	TATTTTCAATATTGTACAAGGGAATGGAAAAATAATGCTCTTTGTTACTAGAATTCGAGCTCGTTTAAAC	0		0		0
YCL052C	PBN1	3	34350	35600	-	AATCGGGAGGAGAATAAACGCAAGAAGTGTGCGTTTCTAGCTGAGTAATG	TCTCCAAGGTATTTGGTAACAACAAGAAGAAAAGATCAGTAAAACGGGAA	CCTATCGTTTTGAATTCAGAAAATACGAGTGCACAGTAGAACAATTTTTA	AATCGGGAGGAGAATAAACGCAAGAAGTGTGCGTTTCTAGCTGAGTAATGCGGATCCCCGGGTTAATTAA	TCTCCAAGGTATTTGGTAACAACAAGAAGAAAAGATCAGTAAAACGGGAACGGATCCCCGGGTTAATTAA	CCTATCGTTTTGAATTCAGAAAATACGAGTGCACAGTAGAACAATTTTTAGAATTCGAGCTCGTTTAAAC	0		0		0
YCL051W	LRE1	3	36072	37823	+	TTCTGAACCCTCGGCAATTATTTCATACTCCTTCTCAGAATAGGAAAATG	GGAAAAGAAAATCCAAATTAGGACTCTTTAGACATATTTTTTCAAGGAAG	TAAGGTTACGATTCACCTTTTTATTACTTATTATTAATATTGTTGTATTA	TTCTGAACCCTCGGCAATTATTTCATACTCCTTCTCAGAATAGGAAAATGCGGATCCCCGGGTTAATTAA	GGAAAAGAAAATCCAAATTAGGACTCTTTAGACATATTTTTTCAAGGAAGCGGATCCCCGGGTTAATTAA	TAAGGTTACGATTCACCTTTTTATTACTTATTATTAATATTGTTGTATTAGAATTCGAGCTCGTTTAAAC	0		0		0
YCL050C	APA1,DTP1	3	38043	39008	-	TTTAGATAGATTTTAGAACAAACAGAAAAGTAAAAATTAAAATAAAAATG	AATGTGGTTTCCCAAACACTTCTGGTCAAAAACCAAACGAATACAACTAT	ATATATATACATACATGTATACGTGTATACTTGTACTTGTGAAGGACTCA	TTTAGATAGATTTTAGAACAAACAGAAAAGTAAAAATTAAAATAAAAATGCGGATCCCCGGGTTAATTAA	AATGTGGTTTCCCAAACACTTCTGGTCAAAAACCAAACGAATACAACTATCGGATCCCCGGGTTAATTAA	ATATATATACATACATGTATACGTGTATACTTGTACTTGTGAAGGACTCAGAATTCGAGCTCGTTTAAAC	0		0		0
YCL049C	YCL049C	3	39993	40931	-	GCAATTCCAGGGTTCAAGAGAGAAAAATCTGTAATCACTTCGAACCAATG	AATCTCTTTGGAGTACATTGAAAAAAATTTTCTCTAAAAGAAGTATAAGT	TTGTAGACTTTTTGCTAGAGACCTCATCAAAGTGCTACCAACTAAGATCA	GCAATTCCAGGGTTCAAGAGAGAAAAATCTGTAATCACTTCGAACCAATGCGGATCCCCGGGTTAATTAA	AATCTCTTTGGAGTACATTGAAAAAAATTTTCTCTAAAAGAAGTATAAGTCGGATCCCCGGGTTAATTAA	TTGTAGACTTTTTGCTAGAGACCTCATCAAAGTGCTACCAACTAAGATCAGAATTCGAGCTCGTTTAAAC	0		0		0
YCL048W-A	YCL048W-A	3	41695	41934	+	TAAAACAATTAAAGCTCCCTTTTCAAACCTTATACTTCCGTTAAATAATG	CGGCGGGTGCCTTTGGAGCAGCAATCGCTGCCGGTGTTGCCTTCTTATTC	TTATGGAATTAGAAAGAAAGAAAAAAATAAAGGAAATAAAAATGTTCCTA	TAAAACAATTAAAGCTCCCTTTTCAAACCTTATACTTCCGTTAAATAATGCGGATCCCCGGGTTAATTAA	CGGCGGGTGCCTTTGGAGCAGCAATCGCTGCCGGTGTTGCCTTCTTATTCCGGATCCCCGGGTTAATTAA	TTATGGAATTAGAAAGAAAGAAAAAAATAAAGGAAATAAAAATGTTCCTAGAATTCGAGCTCGTTTAAAC	0		0		0
YCL048W	SPS22	3	42371	43762	+	TACAACAAGGAAAACCAAAAGCCATTTTTTCATTACTTGATCGACTTATG	AATTGGACCCCCTTCTTTTTGGTACATGCCTTGTTGCTATGTTATTGTTT	TAATATTAGGAACAAAAAAAACTTTCTGTTATACTAGACTAGTAATCTTA	TACAACAAGGAAAACCAAAAGCCATTTTTTCATTACTTGATCGACTTATGCGGATCCCCGGGTTAATTAA	AATTGGACCCCCTTCTTTTTGGTACATGCCTTGTTGCTATGTTATTGTTTCGGATCCCCGGGTTAATTAA	TAATATTAGGAACAAAAAAAACTTTCTGTTATACTAGACTAGTAATCTTAGAATTCGAGCTCGTTTAAAC	0		0		0
YCL047C	YCL047C	3	43867	44643	-	ACTTAATCAATGACGGTTGATAGCAGTACGTGCACTAGCAGACTAATATG	TGCCATTGTGCATATACGATTATTTGATCAATAATAAGACAATATTTGAT	TATACATATATCTCCATGAAAGGCATTTGAATTTCTATCTTTCTCTTTCA	ACTTAATCAATGACGGTTGATAGCAGTACGTGCACTAGCAGACTAATATGCGGATCCCCGGGTTAATTAA	TGCCATTGTGCATATACGATTATTTGATCAATAATAAGACAATATTTGATCGGATCCCCGGGTTAATTAA	TATACATATATCTCCATGAAAGGCATTTGAATTTCTATCTTTCTCTTTCAGAATTCGAGCTCGTTTAAAC	0		0		0
YCL045C	YCL045C	3	44829	47111	-	TACCTACATTCATATCAACACTTTCATCCTCCCCTTCCCCCATAGCAATG	TCCGTCCTTCTGTTTCAAACAAGAAGTTGAAATCCCAATGGCTAATTAAA	GGAGCCTTGAAATGTGTATCTGATATATATAATGTGTATGTAAATATCTA	TACCTACATTCATATCAACACTTTCATCCTCCCCTTCCCCCATAGCAATGCGGATCCCCGGGTTAATTAA	TCCGTCCTTCTGTTTCAAACAAGAAGTTGAAATCCCAATGGCTAATTAAACGGATCCCCGGGTTAATTAA	GGAGCCTTGAAATGTGTATCTGATATATATAATGTGTATGTAAATATCTAGAATTCGAGCTCGTTTAAAC	1	YCL046W	1	YCL046W	0
YCL046W	YCL046W	3	46846	47169	+	CACAAACCATTGCGTTATGGTCATTACTATCCAGTTGAATCTCATCAATG	TGGGGGAAGGGGAGGATGAAAGTGTTGATATGAATGTAGGTATTAGTTAT	ATTATATATGCAAATATATAATAACATATATATATATATACACTCCATTA	CACAAACCATTGCGTTATGGTCATTACTATCCAGTTGAATCTCATCAATGCGGATCCCCGGGTTAATTAA	TGGGGGAAGGGGAGGATGAAAGTGTTGATATGAATGTAGGTATTAGTTATCGGATCCCCGGGTTAATTAA	ATTATATATGCAAATATATAATAACATATATATATATATACACTCCATTAGAATTCGAGCTCGTTTAAAC	1	YCL045C	1	YCL045C	0
YCL044C	MGR1	3	47319	48572	-	CTCATCCTCCTCCATTCCCTCTCCTTTTCCAATTACCGTAATAAAAGATG	AGTCGTTACCAGGGCCTACCCCCAAGGCTCTCACTAATGAAAAGACACAT	AGAAGGATTTAATATACGCACGGTACAACTAAGCAATCCGCAAAGACCTA	CTCATCCTCCTCCATTCCCTCTCCTTTTCCAATTACCGTAATAAAAGATGCGGATCCCCGGGTTAATTAA	AGTCGTTACCAGGGCCTACCCCCAAGGCTCTCACTAATGAAAAGACACATCGGATCCCCGGGTTAATTAA	AGAAGGATTTAATATACGCACGGTACAACTAAGCAATCCGCAAAGACCTAGAATTCGAGCTCGTTTAAAC	0		0		0
YCL043C	PDI1,TRG1,MFP1	3	48860	50428	-	TAAAGCTGCCAAGCTCTACATAAAGAAAAACATACATCTATCCCGTTATG	ATGCTGACGCTGAATTGGCTGACGAAGAAGATGCCATTCACGATGAATTG	AAATTTCTTATATATCTCTATTTAATGAAAAACCAAAGTGATCAGAATTA	TAAAGCTGCCAAGCTCTACATAAAGAAAAACATACATCTATCCCGTTATGCGGATCCCCGGGTTAATTAA	ATGCTGACGCTGAATTGGCTGACGAAGAAGATGCCATTCACGATGAATTGCGGATCCCCGGGTTAATTAA	AAATTTCTTATATATCTCTATTTAATGAAAAACCAAAGTGATCAGAATTAGAATTCGAGCTCGTTTAAAC	1	YCL041C	1	YCL041C	0
YCL041C	YCL041C	3	50340	50827	-	GGGGGCCCCCTGAAAGGGGTTGACCGTCCGTCGGCACACCACTTATAATG	TCCCTGCTGTTCGCCTCCTCTGTTTTCGCCCAACAAGAGGCTGTGGCCCC	TGTACTCATTGAAAGAGTCGGTGGCCAACTTAACGACAGCGGAGTCTTCA	GGGGGCCCCCTGAAAGGGGTTGACCGTCCGTCGGCACACCACTTATAATGCGGATCCCCGGGTTAATTAA	TCCCTGCTGTTCGCCTCCTCTGTTTTCGCCCAACAAGAGGCTGTGGCCCCCGGATCCCCGGGTTAATTAA	TGTACTCATTGAAAGAGTCGGTGGCCAACTTAACGACAGCGGAGTCTTCAGAATTCGAGCTCGTTTAAAC	2	YCL043C;YCL042W	2	YCL043C;YCL042W	0
YCL042W	YCL042W	3	50783	51144	+	CGAAAAAAACAAAAAAAAAAAAATGGGAAATAACAATAACGACAAAAATG	GGACCATATCTGCGACGATTTCGAGGTTACCCCCGAGAAGCTGGACGAAT	CTTTGGTGGAGCTAGACCTTTTTCCATTTGTTCGATGAAGTAAGCAGTTA	CGAAAAAAACAAAAAAAAAAAAATGGGAAATAACAATAACGACAAAAATGCGGATCCCCGGGTTAATTAA	GGACCATATCTGCGACGATTTCGAGGTTACCCCCGAGAAGCTGGACGAATCGGATCCCCGGGTTAATTAA	CTTTGGTGGAGCTAGACCTTTTTCCATTTGTTCGATGAAGTAAGCAGTTAGAATTCGAGCTCGTTTAAAC	2	YCL041C;YCL040W	2	YCL041C;YCL040W	0
YCL040W	GLK1,HOR3	3	51039	52541	+	TCCGTAAACCACAACACCACCACTAATACAACTCTATCATACACAAGATG	TTGCCAAGGATGGTTCCGGAGTGGGTGCCGCCTTGTGTGCGCTTGTAGCA	GGTAAGTACGGTGGGATACGTACACAAACCAAAAAAATGTAAAAAGATCA	TCCGTAAACCACAACACCACCACTAATACAACTCTATCATACACAAGATGCGGATCCCCGGGTTAATTAA	TTGCCAAGGATGGTTCCGGAGTGGGTGCCGCCTTGTGTGCGCTTGTAGCACGGATCCCCGGGTTAATTAA	GGTAAGTACGGTGGGATACGTACACAAACCAAAAAAATGTAAAAAGATCAGAATTCGAGCTCGTTTAAAC	1	YCL042W	1	YCL042W	0
YCL039W	GID7,MOH2	3	52846	55083	+	AAATATGAAAAACACTTCCAAGGGGGCGTACTACTCCAACTAATAAAATG	CTTCTGGCGGTGATGACGGTAAGATAAAAATCTGGAAAATTTCAAGAAAT	TTTTTGTTACATAAAACTTTGCTTACGTATATATATAAGGTGGAGTATTA	AAATATGAAAAACACTTCCAAGGGGGCGTACTACTCCAACTAATAAAATGCGGATCCCCGGGTTAATTAA	CTTCTGGCGGTGATGACGGTAAGATAAAAATCTGGAAAATTTCAAGAAATCGGATCCCCGGGTTAATTAA	TTTTTGTTACATAAAACTTTGCTTACGTATATATATAAGGTGGAGTATTAGAATTCGAGCTCGTTTAAAC	0		0		0
YCL038C	ATG22,AUT4	3	55141	56721	-	GCCCTTATAAGCAATAGTTTGCTCATAACATATTCTCTACATTAGATATG	AGGCTGAAGAACTCAGTCAAGTTTTACCTGAAAGTGAAAGAAGGTTGGAT	TATATATATACGTAAGCAAAGTTTTATGTAACAAAAAAAAAAAAGAACTA	GCCCTTATAAGCAATAGTTTGCTCATAACATATTCTCTACATTAGATATGCGGATCCCCGGGTTAATTAA	AGGCTGAAGAACTCAGTCAAGTTTTACCTGAAAGTGAAAGAAGGTTGGATCGGATCCCCGGGTTAATTAA	TATATATATACGTAAGCAAAGTTTTATGTAACAAAAAAAAAAAAGAACTAGAATTCGAGCTCGTTTAAAC	0		0		0
YCL037C	SRO9	3	57565	58869	-	CTGGACCTGCTAACGTGTTTCATCTTCTTTTCACTTCTCTGCCCACGATG	CCAAAGAAGACTCTGCGCCGGTTGCTGCCGGTGAATCCGAGTCTTCCTTA	AATGCAATGAACGAATCCATTTTTTATTTTGCAAGTGTGAGAGGCCTTTA	CTGGACCTGCTAACGTGTTTCATCTTCTTTTCACTTCTCTGCCCACGATGCGGATCCCCGGGTTAATTAA	CCAAAGAAGACTCTGCGCCGGTTGCTGCCGGTGAATCCGAGTCTTCCTTACGGATCCCCGGGTTAATTAA	AATGCAATGAACGAATCCATTTTTTATTTTGCAAGTGTGAGAGGCCTTTAGAATTCGAGCTCGTTTAAAC	0		0		0
YCL036W	GFD2	3	59217	60917	+	AAAGGAGGCAATGAGAACTTGGGTCTTGCTCGAGAGTCCAGATCCACATG	CGTATTTCGGAACTGCTAAAGACGCCTTCACAAGCACTCTTCCGACACAC	ATACAAGCATGTGTTTGTATTTACAGGAAAAAAATCGATGAATATATTTA	AAAGGAGGCAATGAGAACTTGGGTCTTGCTCGAGAGTCCAGATCCACATGCGGATCCCCGGGTTAATTAA	CGTATTTCGGAACTGCTAAAGACGCCTTCACAAGCACTCTTCCGACACACCGGATCCCCGGGTTAATTAA	ATACAAGCATGTGTTTGTATTTACAGGAAAAAAATCGATGAATATATTTAGAATTCGAGCTCGTTTAAAC	0		0		0
YCL035C	GRX1	3	61032	61364	-	GCATTCGCATAATTATACAAATAGACAAAACCTCAGAAGGAAAAAAAATG	TGAGGGAGACTGGTGAATTGGAGGAATTGTTAGAACCTATTCTTGCAAAT	ATAAGCTCATTATAAACCTGTGTGCATGGAAAAAACTTTGTCTGCCCTTA	GCATTCGCATAATTATACAAATAGACAAAACCTCAGAAGGAAAAAAAATGCGGATCCCCGGGTTAATTAA	TGAGGGAGACTGGTGAATTGGAGGAATTGTTAGAACCTATTCTTGCAAATCGGATCCCCGGGTTAATTAA	ATAAGCTCATTATAAACCTGTGTGCATGGAAAAAACTTTGTCTGCCCTTAGAATTCGAGCTCGTTTAAAC	0		0		0
YCL034W	LSB5	3	61849	62913	+	ACAGTGTGAGAGAGTGATAGAGCATTGGAGGCAGGCAAAACAAGAACATG	CTTATCAGCCGTCCACGATCTCAAACCCTTTCGGTGATCATAACAAAATT	ATATAATATATATATATATATGTGTGTATGCATACGTACATACTTCTTCA	ACAGTGTGAGAGAGTGATAGAGCATTGGAGGCAGGCAAAACAAGAACATGCGGATCCCCGGGTTAATTAA	CTTATCAGCCGTCCACGATCTCAAACCCTTTCGGTGATCATAACAAAATTCGGATCCCCGGGTTAATTAA	ATATAATATATATATATATATGTGTGTATGCATACGTACATACTTCTTCAGAATTCGAGCTCGTTTAAAC	0		0		0
YCL033C	YCL033C	3	62982	63488	-	CGCCGATGATAGTTTAAATAAAGGGAGAAAGGAAGCAATATCAAAAAATG	AGGACACCAGACACTGTGTGAACAGTGCGTCTTTAAACCTCAAGAAGGAT	CACACATATATATATATATATTATATATATATATATATATAGTACATTTA	CGCCGATGATAGTTTAAATAAAGGGAGAAAGGAAGCAATATCAAAAAATGCGGATCCCCGGGTTAATTAA	AGGACACCAGACACTGTGTGAACAGTGCGTCTTTAAACCTCAAGAAGGATCGGATCCCCGGGTTAATTAA	CACACATATATATATATATATTATATATATATATATATATAGTACATTTAGAATTCGAGCTCGTTTAAAC	0		0		0
YCL032W	STE50	3	63647	64687	+	AAGGACTCGAAAAGACAGAGGTCGTACTAGCAGAGATAGCAAATCAGATG	AAGTAGCAATGATGAACGGAAGTGACAATGTCACCCCCGGTGGAAGACTC	TCCTATTCGTGTAAGTTTAGTATGATGATGTGCATGACAACTGCACATTA	AAGGACTCGAAAAGACAGAGGTCGTACTAGCAGAGATAGCAAATCAGATGCGGATCCCCGGGTTAATTAA	AAGTAGCAATGATGAACGGAAGTGACAATGTCACCCCCGGTGGAAGACTCCGGATCCCCGGGTTAATTAA	TCCTATTCGTGTAAGTTTAGTATGATGATGTGCATGACAACTGCACATTAGAATTCGAGCTCGTTTAAAC	0		0		0
YCL031C	RRP7	3	64881	65774	-	CGAACGAACTAGGTAACAGATAACAACCTCAGATAGAGTGTTACGGGATG	AAGAAAGAATCAAGGTAATGAAAGCTAAGAGAAAATTCAATCCATACACT	TTATAGATATATTGAGATATGTTGAATATGATGACGAGGATGGTGGTTTA	CGAACGAACTAGGTAACAGATAACAACCTCAGATAGAGTGTTACGGGATGCGGATCCCCGGGTTAATTAA	AAGAAAGAATCAAGGTAATGAAAGCTAAGAGAAAATTCAATCCATACACTCGGATCCCCGGGTTAATTAA	TTATAGATATATTGAGATATGTTGAATATGATGACGAGGATGGTGGTTTAGAATTCGAGCTCGTTTAAAC	0		0		0
YCL030C	HIS4	3	66140	68539	-	GCTGTGTAATAGTAATACAATAGTTTACAAAATTTTTTTTCTGAATAATG	CTGTGAAAATCAGAATGAGTAAGCTTGGGTTGATCCCAAAGGATTTCCAG	TATACATATTATTTTCGTTAGTGTTCGGTTTCCAAGTTAGAAATAATCTA	GCTGTGTAATAGTAATACAATAGTTTACAAAATTTTTTTTCTGAATAATGCGGATCCCCGGGTTAATTAA	CTGTGAAAATCAGAATGAGTAAGCTTGGGTTGATCCCAAAGGATTTCCAGCGGATCCCCGGGTTAATTAA	TATACATATTATTTTCGTTAGTGTTCGGTTTCCAAGTTAGAAATAATCTAGAATTCGAGCTCGTTTAAAC	0		0		0
YCL029C	BIK1,PAC14,ARM5	3	68805	70127	-	GTAAAAGGCGTTGAGCTGTGGCTGGCTGTGTATGCGTTTGAAATACCATG	ATAATACAGCAGAATGCCCCCATCACAATCCTGACAACCAGCAGTTCTTC	TTAATTAACTAATTTACCGGAGTCACTATTAGAGTCAGTTCGACTGCCTA	GTAAAAGGCGTTGAGCTGTGGCTGGCTGTGTATGCGTTTGAAATACCATGCGGATCCCCGGGTTAATTAA	ATAATACAGCAGAATGCCCCCATCACAATCCTGACAACCAGCAGTTCTTCCGGATCCCCGGGTTAATTAA	TTAATTAACTAATTTACCGGAGTCACTATTAGAGTCAGTTCGACTGCCTAGAATTCGAGCTCGTTTAAAC	0		0		0
YCL028W	RNQ1,%5BPIN(%2B)%5D	3	70356	71573	+	TAAAAGAACGTACATATAGCGATACAAACGTATAGCAAAGATCTGAAATG	TTTCTGGCAACTTTTCTCAACAGAACAATAACGGCAACCAGAACCGCTAC	ATAAACAAATACGTAAACAAAGGATAGAAGGCGAACTGAATCATCGTTCA	TAAAAGAACGTACATATAGCGATACAAACGTATAGCAAAGATCTGAAATGCGGATCCCCGGGTTAATTAA	TTTCTGGCAACTTTTCTCAACAGAACAATAACGGCAACCAGAACCGCTACCGGATCCCCGGGTTAATTAA	ATAAACAAATACGTAAACAAAGGATAGAAGGCGAACTGAATCATCGTTCAGAATTCGAGCTCGTTTAAAC	0		0		0
YCL027W	FUS1	3	72008	73546	+	TTTCCTTTAAGAGCAGGATATAAGCCATCAAGTTTCTGAAAATCAAAATG	TCAATGAAGATAGAGGCATTGTGCCTGGTGACTGTCTCCAAGAATACGAC	ACAGAATTATAGGTATAGATTAAATGCGAACGTCAATATTATTTTCATCA	TTTCCTTTAAGAGCAGGATATAAGCCATCAAGTTTCTGAAAATCAAAATGCGGATCCCCGGGTTAATTAA	TCAATGAAGATAGAGGCATTGTGCCTGGTGACTGTCTCCAAGAATACGACCGGATCCCCGGGTTAATTAA	ACAGAATTATAGGTATAGATTAAATGCGAACGTCAATATTATTTTCATCAGAATTCGAGCTCGTTTAAAC	0		0		0
YCL026C-B	HBN1,YCL027C-A	3	73610	74191	-	CTGAAGTATCCTATATCAACATATATACAAAGAAACAATCCAATATCATG	CACCTCCAGGTGAAAAGACCTACATCAAAAACGATGTTGAAATCTTCAAT	GTTCGCATTTAATCTATACCTATAATTCTGTACTTATATACTGTTCCTTA	CTGAAGTATCCTATATCAACATATATACAAAGAAACAATCCAATATCATGCGGATCCCCGGGTTAATTAA	CACCTCCAGGTGAAAAGACCTACATCAAAAACGATGTTGAAATCTTCAATCGGATCCCCGGGTTAATTAA	GTTCGCATTTAATCTATACCTATAATTCTGTACTTATATACTGTTCCTTAGAATTCGAGCTCGTTTAAAC	0		0		0
YCL026C-A	FRM2,YCLX08C	3	74909	75490	-	TATATACACCATCAAAATCAAGAACACCAGACCTCCAAGCCAAAAAAATG	CCTTGCCAGAAGAAAAGACTTTTATCAATAACGTAATCAACGTTTATCAC	TTACTTCATGAGATAAATTAAGATCTGCTCATATGCGAATTTCCTGTTCA	TATATACACCATCAAAATCAAGAACACCAGACCTCCAAGCCAAAAAAATGCGGATCCCCGGGTTAATTAA	CCTTGCCAGAAGAAAAGACTTTTATCAATAACGTAATCAACGTTTATCACCGGATCCCCGGGTTAATTAA	TTACTTCATGAGATAAATTAAGATCTGCTCATATGCGAATTTCCTGTTCAGAATTCGAGCTCGTTTAAAC	0		0		0
YCL025C	AGP1,YCC5	3	76222	78123	-	TCTTTATAGAAGAAGCACGCTAATATAGACAAAGATAGCTTCGCACAATG	AACGTTTGAGGAACGGACCTTATTGGAAAAGGGTCGTTGCCTTCTGGTGT	CAGAAGTACAAAAATGAATAAATATAAAAGAAGTAAATGCTTTTTTTTTA	TCTTTATAGAAGAAGCACGCTAATATAGACAAAGATAGCTTCGCACAATGCGGATCCCCGGGTTAATTAA	AACGTTTGAGGAACGGACCTTATTGGAAAAGGGTCGTTGCCTTCTGGTGTCGGATCCCCGGGTTAATTAA	CAGAAGTACAAAAATGAATAAATATAAAAGAAGTAAATGCTTTTTTTTTAGAATTCGAGCTCGTTTAAAC	0		0		0
YCL023C	YCL023C	3	79155	79502	-	CCGTTGTTGTTGAAAATGGACTTTGAGATTACTTTGACGGCTGTTCTATG	ACGCGTTTTCTTGCACAGCACGCGAAAAAAAGAACGAGATGTTTTCCTTT	GTAAAGGCGCTCTTTCAGCAATGACGATTTATGCTAATATGTTTTCCTTA	CCGTTGTTGTTGAAAATGGACTTTGAGATTACTTTGACGGCTGTTCTATGCGGATCCCCGGGTTAATTAA	ACGCGTTTTCTTGCACAGCACGCGAAAAAAAGAACGAGATGTTTTCCTTTCGGATCCCCGGGTTAATTAA	GTAAAGGCGCTCTTTCAGCAATGACGATTTATGCTAATATGTTTTCCTTAGAATTCGAGCTCGTTTAAAC	1	YCL024W	1	YCL024W	0
YCL024W	KCC4	3	79368	82481	+	ATAGGCTTGATAATAGTGCTGACGTAAATTACCAGAACTACTGCAGTATG	TTGCTACAGAAATCCAAATTATTTTACAAAAAGAAGGTGTTTTGGACAAA	GTTACATCGTATTGTCCATTTGGGGATCGATTATCCCTCCCTTTTTTTTA	ATAGGCTTGATAATAGTGCTGACGTAAATTACCAGAACTACTGCAGTATGCGGATCCCCGGGTTAATTAA	TTGCTACAGAAATCCAAATTATTTTACAAAAAGAAGGTGTTTTGGACAAACGGATCCCCGGGTTAATTAA	GTTACATCGTATTGTCCATTTGGGGATCGATTATCCCTCCCTTTTTTTTAGAATTCGAGCTCGTTTAAAC	2	YCL023C;YCL022C	2	YCL023C;YCL022C	0
YCL022C	YCL022C	3	81776	82291	-	GCGTAGATCGTAAAAATAAAATACTGTCATTCACCAATTTTCCTGTTATG	GGTTTGGATTTTTATCCTTCATGTCGTATTCCTGTGATATGCCAACGCCT	AAGGATGGTGATAATGTGAATAATGATAATATATTGAGCGACTTTCCTCA	GCGTAGATCGTAAAAATAAAATACTGTCATTCACCAATTTTCCTGTTATGCGGATCCCCGGGTTAATTAA	GGTTTGGATTTTTATCCTTCATGTCGTATTCCTGTGATATGCCAACGCCTCGGATCCCCGGGTTAATTAA	AAGGATGGTGATAATGTGAATAATGATAATATATTGAGCGACTTTCCTCAGAATTCGAGCTCGTTTAAAC	1	YCL024W	1	YCL024W	0
YCL021W-A	YCL021W-A	3	83482	83859	+	AGAGGAACAGTAAAATAAAGCGAGTTACGTGAAATTAATATTTTTAAATG	TCCTGACACCATTGGCTATTTGGATATTTTATATTGACTTTCGTGTACAT	AATAGTCAATGCCCGTGGTTCATTTGCCAATAGAACAGTCGATGTGATCA	AGAGGAACAGTAAAATAAAGCGAGTTACGTGAAATTAATATTTTTAAATGCGGATCCCCGGGTTAATTAA	TCCTGACACCATTGGCTATTTGGATATTTTATATTGACTTTCGTGTACATCGGATCCCCGGGTTAATTAA	AATAGTCAATGCCCGTGGTTCATTTGCCAATAGAACAGTCGATGTGATCAGAATTCGAGCTCGTTTAAAC	0		0		0
YCL020W	YCL020W	3	86591	87907	+	NNNNNNNNNNNNNNNNNNNNNNNNNNNNNNNNNNNNNNNNNNNNNNNNNN	NNNNNNNNNNNNNNNNNNNNNNNNNNNNNNNNNNNNNNNNNNNNNNNNNN	NNNNNNNNNNNNNNNNNNNNNNNNNNNNNNNNNNNNNNNNNNNNNNNNNN	NNNNNNNNNNNNNNNNNNNNNNNNNNNNNNNNNNNNNNNNNNNNNNNATGCGGATCCCCGGGTTAATTAA	NNNNNNNNNNNNNNNNNNNNNNNNNNNNNNNNNNNNNNNNNNNNNNNNNNCGGATCCCCGGGTTAATTAA	NNNNNNNNNNNNNNNNNNNNNNNNNNNNNNNNNNNNNNNNNNNNNNNNNNGAATTCGAGCTCGTTTAAAC	1	YCL019W	1	YCL019W	0
YCL019W	YCL019W	3	86591	91904	+	NNNNNNNNNNNNNNNNNNNNNNNNNNNNNNNNNNNNNNNNNNNNNNNNNN	NNNNNNNNNNNNNNNNNNNNNNNNNNNNNNNNNNNNNNNNNNNNNNNNNN	NNNNNNNNNNNNNNNNNNNNNNNNNNNNNNNNNNNNNNNNNNNNNNNNNN	NNNNNNNNNNNNNNNNNNNNNNNNNNNNNNNNNNNNNNNNNNNNNNNATGCGGATCCCCGGGTTAATTAA	NNNNNNNNNNNNNNNNNNNNNNNNNNNNNNNNNNNNNNNNNNNNNNNNNNCGGATCCCCGGGTTAATTAA	NNNNNNNNNNNNNNNNNNNNNNNNNNNNNNNNNNNNNNNNNNNNNNNNNNGAATTCGAGCTCGTTTAAAC	1	YCL020W	1	YCL020W	0
YCL018W	LEU2	3	94616	95710	+	TTCAGCAATATATATATATATATATATTTCAAGGATATACCATTGTAATG	NNNNNNNNNNNNNNNNNNNNNNNNNNNNNNNNNNNNNNNNNNNNNNNNNN	NNNNNNNNNNNNNNNNNNNNNNNNNNNNNNNNNNNNNNNNNNNNNNNNNN	TTCAGCAATATATATATATATATATATTTCAAGGATATACCATTGTAATGCGGATCCCCGGGTTAATTAA	NNNNNNNNNNNNNNNNNNNNNNNNNNNNNNNNNNNNNNNNNNNNNNNNNNCGGATCCCCGGGTTAATTAA	NNNNNNNNNNNNNNNNNNNNNNNNNNNNNNNNNNNNNNNNNNNNNNNNNNGAATTCGAGCTCGTTTAAAC	0		0		0
YCL017C	NFS1,SPL1	3	96069	97562	-	TTCATTAAAATATATCGCATACACGAAGGAACTGCTACAACTGGAAGATG	NNNNNNNNNNNNNNNNNNNNNNNNNNNNNNNNNNNNNNNNNNNNNNNNNN	NNNNNNNNNNNNNNNNNNNNNNNNNNNNNNNNNNNNNNNNNNNNNNNNNN	TTCATTAAAATATATCGCATACACGAAGGAACTGCTACAACTGGAAGATGCGGATCCCCGGGTTAATTAA	NNNNNNNNNNNNNNNNNNNNNNNNNNNNNNNNNNNNNNNNNNNNNNNNNNCGGATCCCCGGGTTAATTAA	NNNNNNNNNNNNNNNNNNNNNNNNNNNNNNNNNNNNNNNNNNNNNNNNNNGAATTCGAGCTCGTTTAAAC	0		0		0
YCL016C	DCC1	3	97911	99053	-	GAACGGTAAAAATCCACCAGAGATTTGCTCACTAGTAATCCTGTACCATG	AGTATGCCCGCCGTAAAAGACTGGGCAAAAAGACCGTGGTCACGAGCAGG	TGGTTCCGCTATATATTGGCATTGCCCATCGAAGGCAGTTTTGTGTGCTA	GAACGGTAAAAATCCACCAGAGATTTGCTCACTAGTAATCCTGTACCATGCGGATCCCCGGGTTAATTAA	AGTATGCCCGCCGTAAAAGACTGGGCAAAAAGACCGTGGTCACGAGCAGGCGGATCCCCGGGTTAATTAA	TGGTTCCGCTATATATTGGCATTGCCCATCGAAGGCAGTTTTGTGTGCTAGAATTCGAGCTCGTTTAAAC	0		0		0
YCL014W	BUD3,YCL012W	3	99571	104481	+	TTCGGGCTGTTATCAGGTTGCTAAAAGAGTATATTTACACCTCACCAATG	ATGGGAAACAGAATTGTGCTGTTGGTGGCCCAGAGAAACTGAAATTTTAT	GTATACATTGCATTAAATTAAAAAGAAAAAAAAAATCAATAAAACACTCA	TTCGGGCTGTTATCAGGTTGCTAAAAGAGTATATTTACACCTCACCAATGCGGATCCCCGGGTTAATTAA	ATGGGAAACAGAATTGTGCTGTTGGTGGCCCAGAGAAACTGAAATTTTATCGGATCCCCGGGTTAATTAA	GTATACATTGCATTAAATTAAAAAGAAAAAAAAAATCAATAAAACACTCAGAATTCGAGCTCGTTTAAAC	0		0		0
YCL012C	YCL012C	3	104607	105078	-	GAGAAGAAAAGCTACACAATTCCTTTCCAAAAATTGCAAATACGAGTATG	CCCCCGATGGAACCCCTATTGATCCAAAAGCATTCACCTTTGATAGTAGG	GGGGGAAAAACCTCCCACTTAAGTAAAACTGAATATATTAGATACCTTTA	GAGAAGAAAAGCTACACAATTCCTTTCCAAAAATTGCAAATACGAGTATGCGGATCCCCGGGTTAATTAA	CCCCCGATGGAACCCCTATTGATCCAAAAGCATTCACCTTTGATAGTAGGCGGATCCCCGGGTTAATTAA	GGGGGAAAAACCTCCCACTTAAGTAAAACTGAATATATTAGATACCTTTAGAATTCGAGCTCGTTTAAAC	0		0		0
YCL011C	GBP2,RLF6	3	105365	106648	-	GCTATGGGCGAAAAGGAAACAAACATCAGCTGGATTTTTTCGCCAAGATG	ATTATAATTATGGTGGTTGTAGTTTACAGATCTCTTATGCTAGACGTGAT	ACGTTATCATAAAGTACACAGGTCATGGTTCGGTTGGTGCTTAGGAATTA	GCTATGGGCGAAAAGGAAACAAACATCAGCTGGATTTTTTCGCCAAGATGCGGATCCCCGGGTTAATTAA	ATTATAATTATGGTGGTTGTAGTTTACAGATCTCTTATGCTAGACGTGATCGGATCCCCGGGTTAATTAA	ACGTTATCATAAAGTACACAGGTCATGGTTCGGTTGGTGCTTAGGAATTAGAATTCGAGCTCGTTTAAAC	0		0		0
YCL010C	SGF29	3	106861	107640	-	AGTGGGGGGAGTTTTTCACAGCAAAACACACGGTCACCTTTCTTATTATG	GCCGTCTAGTGCTGCCTTCGCCAACGGCTTCGGCAAACCTAGCAAGGAAA	TGCCATGAGAAGATCTTATGATATGTAGTAAATGTTAACCACCATTGCTA	AGTGGGGGGAGTTTTTCACAGCAAAACACACGGTCACCTTTCTTATTATGCGGATCCCCGGGTTAATTAA	GCCGTCTAGTGCTGCCTTCGCCAACGGCTTCGGCAAACCTAGCAAGGAAACGGATCCCCGGGTTAATTAA	TGCCATGAGAAGATCTTATGATATGTAGTAAATGTTAACCACCATTGCTAGAATTCGAGCTCGTTTAAAC	0		0		0
YCL009C	ILV6	3	107909	108838	-	TATACAGAATCTTTAGAACATCTGAGCTCACTAACCCAGTCTTTCTAATG	AAGACGAAAAGATCAGCGAAATCGTCGACATTTCCCAACTACCACCTGGT	TGTATAGAGGAGAGTCCCGAGGGCGATCGCAAGGCCGAGAGACTAACCTA	TATACAGAATCTTTAGAACATCTGAGCTCACTAACCCAGTCTTTCTAATGCGGATCCCCGGGTTAATTAA	AAGACGAAAAGATCAGCGAAATCGTCGACATTTCCCAACTACCACCTGGTCGGATCCCCGGGTTAATTAA	TGTATAGAGGAGAGTCCCGAGGGCGATCGCAAGGCCGAGAGACTAACCTAGAATTCGAGCTCGTTTAAAC	0		0		0
YCL008C	STP22,VPS23	3	108993	110150	-	AGTTGGTATCTTAACGGCCAAGAAAAGAGAGAGAGTGAAGAGCAACGATG	AGCAATTCCTTGTGCGATGGCACATCCAACGAATCACCTCACCGTTATCG	ATATTTTTTGTTTTCGATGGCACTTCGGCGATGCGAAAGAAAGTGAGTCA	AGTTGGTATCTTAACGGCCAAGAAAAGAGAGAGAGTGAAGAGCAACGATGCGGATCCCCGGGTTAATTAA	AGCAATTCCTTGTGCGATGGCACATCCAACGAATCACCTCACCGTTATCGCGGATCCCCGGGTTAATTAA	ATATTTTTTGTTTTCGATGGCACTTCGGCGATGCGAAAGAAAGTGAGTCAGAATTCGAGCTCGTTTAAAC	0		0		0
YCL007C	YCL007C	3	110271	110663	-	TCTGCAAATTCAGGTCTCAAATCTGAACGGCGTGGAGCCACCAAGGGATG	TCATTACTCTTTGTTCTTTATTATTCGTTGGACCTTTGTTTCTTAAAGTA	TATTCTCGCTCTGTGAAAAAAGACTACTACATTTTTTGACCTTTTATCTA	TCTGCAAATTCAGGTCTCAAATCTGAACGGCGTGGAGCCACCAAGGGATGCGGATCCCCGGGTTAATTAA	TCATTACTCTTTGTTCTTTATTATTCGTTGGACCTTTGTTTCTTAAAGTACGGATCCCCGGGTTAATTAA	TATTCTCGCTCTGTGAAAAAAGACTACTACATTTTTTGACCTTTTATCTAGAATTCGAGCTCGTTTAAAC	1	YCL005W-A	1	YCL005W-A	0
YCL005W-A	VMA9,LDB10,CWH36	3	110320	110714	+	ATACTTTAAGAAACAAAGGTCCAACGAATAATAAAGAACAAAGAGTAATG	ATCCCTTGGTGGCTCCACGCCGTTCAGATTTGAGACCTGAATTTGCAGAA	TTTTCTTATACTCAGGAAACGTCACTTGGCTTGATATACTCGACGCTTTA	ATACTTTAAGAAACAAAGGTCCAACGAATAATAAAGAACAAAGAGTAATGCGGATCCCCGGGTTAATTAA	ATCCCTTGGTGGCTCCACGCCGTTCAGATTTGAGACCTGAATTTGCAGAACGGATCCCCGGGTTAATTAA	TTTTCTTATACTCAGGAAACGTCACTTGGCTTGATATACTCGACGCTTTAGAATTCGAGCTCGTTTAAAC	1	YCL007C	1	YCL007C	0
YCL005W	LDB16	3	111318	112088	+	CATCAGCAACTGTAGGAGGAGAAAGCAGGTATATAACTAGCCGCAATATG	CCAGTGATGCGGACATCGTTAATATAAAGATTTTACGAAGGAATTCTAGG	ATTTCTATCATTCACTTGTTAGTGCATGAGAAGAAGTAATTGCAATATCA	CATCAGCAACTGTAGGAGGAGAAAGCAGGTATATAACTAGCCGCAATATGCGGATCCCCGGGTTAATTAA	CCAGTGATGCGGACATCGTTAATATAAAGATTTTACGAAGGAATTCTAGGCGGATCCCCGGGTTAATTAA	ATTTCTATCATTCACTTGTTAGTGCATGAGAAGAAGTAATTGCAATATCAGAATTCGAGCTCGTTTAAAC	0		0		0
YCL004W	PGS1,YCL003W,PEL1	3	112402	113967	+	CAGCTTGTCCATAATTGCTAATAGCATACTCAGGATAACATATATTAATG	ATGTTGGCACTGGTGTAAAGATAGCTACCTCCATTTTGGGTAAAAAACTT	TTTTATTTTTCCATATTTACAGGCGACATACTATGATAGAATAGAATCTA	CAGCTTGTCCATAATTGCTAATAGCATACTCAGGATAACATATATTAATGCGGATCCCCGGGTTAATTAA	ATGTTGGCACTGGTGTAAAGATAGCTACCTCCATTTTGGGTAAAAAACTTCGGATCCCCGGGTTAATTAA	TTTTATTTTTCCATATTTACAGGCGACATACTATGATAGAATAGAATCTAGAATTCGAGCTCGTTTAAAC	0		0		0
YCL002C	YCL002C	3	114140	114972	-	AGGAGAGGTTGAGGAGCCCTGCGAAGCAATTATATTGAATCATTCACATG	ACAATTTGTCACCTTATTGGTCATACTTTGTCAAGTTCAGTATGTTTACG	GAGCTGACCTTGTTATAGTTTTCCTTTTGGCAACCGTGGTTTCCGTCCTA	AGGAGAGGTTGAGGAGCCCTGCGAAGCAATTATATTGAATCATTCACATGCGGATCCCCGGGTTAATTAA	ACAATTTGTCACCTTATTGGTCATACTTTGTCAAGTTCAGTATGTTTACGCGGATCCCCGGGTTAATTAA	GAGCTGACCTTGTTATAGTTTTCCTTTTGGCAACCGTGGTTTCCGTCCTAGAATTCGAGCTCGTTTAAAC	0		0		0
YCL001W	RER1	3	115213	115779	+	ACTAAGTGTTACACGAAAGGCATAGAGTATCAAAAAAAGGAAGCAAGATG	GATATATACCCTTAGATATCGGTAAGAAGAAATATTCTCATTCTTCTAAC	TAAGATACGAATGTGTTCGTTGAATAGGTATGTGGAGTCAGGGTATATCA	ACTAAGTGTTACACGAAAGGCATAGAGTATCAAAAAAAGGAAGCAAGATGCGGATCCCCGGGTTAATTAA	GATATATACCCTTAGATATCGGTAAGAAGAAATATTCTCATTCTTCTAACCGGATCCCCGGGTTAATTAA	TAAGATACGAATGTGTTCGTTGAATAGGTATGTGGAGTCAGGGTATATCAGAATTCGAGCTCGTTTAAAC	0		0		0
YCL001W-A	YCL001W-A	3	116377	116838	+	CGAAGATAACGGTTACACAATTATCACGTTGATTCGTCAACTTAAAGATG	ACAAGAAAGAACGGATGACACAGTGGTTAGAAATTTCAATTTTGATGAAC	CAGCAGTGTCTTCGCATAAAATCCAGGGGAGCATAATATTATTATTCTCA	CGAAGATAACGGTTACACAATTATCACGTTGATTCGTCAACTTAAAGATGCGGATCCCCGGGTTAATTAA	ACAAGAAAGAACGGATGACACAGTGGTTAGAAATTTCAATTTTGATGAACCGGATCCCCGGGTTAATTAA	CAGCAGTGTCTTCGCATAAAATCCAGGGGAGCATAATATTATTATTCTCAGAATTCGAGCTCGTTTAAAC	0		0		0
YCL001W-B	YCL001W-B	3	117067	117321	+	ACTCTATGATAGTGCATAACACTAAAAAGTTGAAAGAATCCCGTATCATG	TACTCAGTACTTCAAAAATCACAGTGAGCAACTTGACAAACCAACAGATA	TTTGAAAAGTTCATCAAGGTATTGGATGGTATATTTTAAGATACAGCCTA	ACTCTATGATAGTGCATAACACTAAAAAGTTGAAAGAATCCCGTATCATGCGGATCCCCGGGTTAATTAA	TACTCAGTACTTCAAAAATCACAGTGAGCAACTTGACAAACCAACAGATACGGATCCCCGGGTTAATTAA	TTTGAAAAGTTCATCAAGGTATTGGATGGTATATTTTAAGATACAGCCTAGAATTCGAGCTCGTTTAAAC	0		0		0
YCR001W	YCR001W	3	118982	119296	+	GGAGTTCTACGTAAACCACTTAGAATGCAGTTTCTCTTCTAAATAACATG	TTCTAAAGAAAATATCCTTTTTTATTTATGTGAACTTCACTGTATACTTT	GTCAAGAAAAGTGATCGAGTAAAATAGAAGAAATCCACCGAAAGGTACTA	GGAGTTCTACGTAAACCACTTAGAATGCAGTTTCTCTTCTAAATAACATGCGGATCCCCGGGTTAATTAA	TTCTAAAGAAAATATCCTTTTTTATTTATGTGAACTTCACTGTATACTTTCGGATCCCCGGGTTAATTAA	GTCAAGAAAAGTGATCGAGTAAAATAGAAGAAATCCACCGAAAGGTACTAGAATTCGAGCTCGTTTAAAC	0		0		0
YCR002C	CDC10	3	120677	121645	-	ACAAGGCCAAGCCCCACGGTTACTACAAGCACTCTATAAATATATTAATG	ATGCGAATAGTCGTTCCTCAGCTCATATGTCTAGCAACGCCATTCAACGT	AATTCTTAATAACATAAGATATATAATCACCACCATTCTTATGAGATTCA	ACAAGGCCAAGCCCCACGGTTACTACAAGCACTCTATAAATATATTAATGCGGATCCCCGGGTTAATTAA	ATGCGAATAGTCGTTCCTCAGCTCATATGTCTAGCAACGCCATTCAACGTCGGATCCCCGGGTTAATTAA	AATTCTTAATAACATAAGATATATAATCACCACCATTCTTATGAGATTCAGAATTCGAGCTCGTTTAAAC	0		0		0
YCR003W	MRPL32	3	121917	122468	+	ACCTTAACTTGGAGACAAAAACACCAGGGAATATCAGCAAACAAACTATG	AAGATAAAGATAACTATTTGGAACGTCGCGTTCGGACTTTAAAAAAGGAC	CAGGCTTAAGTTTATTTAAAAAGGAAACCACTAGATGAAAGATGAGCCTA	ACCTTAACTTGGAGACAAAAACACCAGGGAATATCAGCAAACAAACTATGCGGATCCCCGGGTTAATTAA	AAGATAAAGATAACTATTTGGAACGTCGCGTTCGGACTTTAAAAAAGGACCGGATCCCCGGGTTAATTAA	CAGGCTTAAGTTTATTTAAAAAGGAAACCACTAGATGAAAGATGAGCCTAGAATTCGAGCTCGTTTAAAC	0		0		0
YCR004C	YCP4	3	122872	123615	-	AAAGAGAGTAAACAAAACAATACAAACTCAATTGAAGCACTATAAGAATG	CTGCAGAAAAGAAGGAGGACAAAGGATTATTATCCTGCTGCACTGTCATG	GAATTAATGTTAGTAAGAACTAAATATTAGACGCGAACTGTTGTTTCTTA	AAAGAGAGTAAACAAAACAATACAAACTCAATTGAAGCACTATAAGAATGCGGATCCCCGGGTTAATTAA	CTGCAGAAAAGAAGGAGGACAAAGGATTATTATCCTGCTGCACTGTCATGCGGATCCCCGGGTTAATTAA	GAATTAATGTTAGTAAGAACTAAATATTAGACGCGAACTGTTGTTTCTTAGAATTCGAGCTCGTTTAAAC	0		0		0
YCR005C	CIT2	3	124243	125625	-	ACAGGTTCTCAAAACTTTTTGTTTTAATAATACTAGTAACAAGAAAAATG	ATTCTACTGAGAAATACAAGGAATTGGTCAAAAACATTGAAAGCAAACTA	AGGAAAGAAAAATATGCAGAGGGGTGTAAAAGTAGGATGTAATCCAACTA	ACAGGTTCTCAAAACTTTTTGTTTTAATAATACTAGTAACAAGAAAAATGCGGATCCCCGGGTTAATTAA	ATTCTACTGAGAAATACAAGGAATTGGTCAAAAACATTGAAAGCAAACTACGGATCCCCGGGTTAATTAA	AGGAAAGAAAAATATGCAGAGGGGTGTAAAAGTAGGATGTAATCCAACTAGAATTCGAGCTCGTTTAAAC	0		0		0
YCR006C	YCR006C	3	125827	126300	-	ATTAAAAACAAGAAAATGTGTTGCCATTTCCGTAAAATGAATGGCCCATG	AAAACAATAACAATGGTAACCGCAATTACCTTTTGAGCGTTACATTCGTA	TGGGCCCTTTTGAGAGCATGACTATCTTTAGATTAACGTCACCAATTTCA	ATTAAAAACAAGAAAATGTGTTGCCATTTCCGTAAAATGAATGGCCCATGCGGATCCCCGGGTTAATTAA	AAAACAATAACAATGGTAACCGCAATTACCTTTTGAGCGTTACATTCGTACGGATCCCCGGGTTAATTAA	TGGGCCCTTTTGAGAGCATGACTATCTTTAGATTAACGTCACCAATTTCAGAATTCGAGCTCGTTTAAAC	0		0		0
YCR007C	YCR007C	3	129308	130027	-	CGGTTGTCTATACCATATCAAGACAAGAAACAAAACTCCGTATCTGCATG	AAGCACAACAGGAATATTGGAGAAAGCAATATCCTGACGCCGATATACCA	TACATCGCTCAGTATAAGTGCTAAATAAAATTATCAAGATTTATATTTCA	CGGTTGTCTATACCATATCAAGACAAGAAACAAAACTCCGTATCTGCATGCGGATCCCCGGGTTAATTAA	AAGCACAACAGGAATATTGGAGAAAGCAATATCCTGACGCCGATATACCACGGATCCCCGGGTTAATTAA	TACATCGCTCAGTATAAGTGCTAAATAAAATTATCAAGATTTATATTTCAGAATTCGAGCTCGTTTAAAC	0		0		0
YCR008W	SAT4,HAL4	3	131767	133578	+	AAAAAGTAATCAGATTTTATTTTATTTCGACATTACCCCTCAAATATATG	GTGAATGGGGAAGAGAGATAAAATGCTGCCATAATGGGCGCGCATTGAAA	ACCGAATTGTTCCAAAATATCGTGATATTTGAAAGTGAAGTACTCGTTTA	AAAAAGTAATCAGATTTTATTTTATTTCGACATTACCCCTCAAATATATGCGGATCCCCGGGTTAATTAA	GTGAATGGGGAAGAGAGATAAAATGCTGCCATAATGGGCGCGCATTGAAACGGATCCCCGGGTTAATTAA	ACCGAATTGTTCCAAAATATCGTGATATTTGAAAGTGAAGTACTCGTTTAGAATTCGAGCTCGTTTAAAC	0		0		0
YCR009C	RVS161,SPE161,FUS7,END6	3	134042	134839	-	AACTATACAAATCCTATTATAAGAAGCCAGAAGAAAGCTGATACAAGATG	AACTATTAGGACAAATGACAAGCCTAGATATTTGTGCGCTCGGGATAAAA	GAAAGAAACATAAATGACCGTAAAAAACTAAAGGCAAAAGCATTAATTTA	AACTATACAAATCCTATTATAAGAAGCCAGAAGAAAGCTGATACAAGATGCGGATCCCCGGGTTAATTAA	AACTATTAGGACAAATGACAAGCCTAGATATTTGTGCGCTCGGGATAAAACGGATCCCCGGGTTAATTAA	GAAAGAAACATAAATGACCGTAAAAAACTAAAGGCAAAAGCATTAATTTAGAATTCGAGCTCGTTTAAAC	0		0		0
YCR010C	ADY2,ATO1	3	135570	136421	-	AGATATAACTAAACAACCACAAAACAACTCATATACAAACAAATAATATG	ATGTACTGGCTCGTCCATTCCCATTACCATCTACTGAAAGGGTAATCTTT	CTACTCTTTTTTATTTCAATAGTTCTCGTTATTAGTAGGTCGTGCTCTTA	AGATATAACTAAACAACCACAAAACAACTCATATACAAACAAATAATATGCGGATCCCCGGGTTAATTAA	ATGTACTGGCTCGTCCATTCCCATTACCATCTACTGAAAGGGTAATCTTTCGGATCCCCGGGTTAATTAA	CTACTCTTTTTTATTTCAATAGTTCTCGTTATTAGTAGGTCGTGCTCTTAGAATTCGAGCTCGTTTAAAC	0		0		0
YCR011C	ADP1	3	137021	140170	-	TACAGAAACTTGCACACTAAAAATACACAACTAAAAGCAATTACAGTATG	TTTTAATAATGGGGTATCTAGCCCTTAAGTGGATAGTTGTGGAACAAAAG	AAATTATTATTTCTTATGTAAAAGAAGAGACTATATACGACGCCTATCTA	TACAGAAACTTGCACACTAAAAATACACAACTAAAAGCAATTACAGTATGCGGATCCCCGGGTTAATTAA	TTTTAATAATGGGGTATCTAGCCCTTAAGTGGATAGTTGTGGAACAAAAGCGGATCCCCGGGTTAATTAA	AAATTATTATTTCTTATGTAAAAGAAGAGACTATATACGACGCCTATCTAGAATTCGAGCTCGTTTAAAC	0		0		0
YCR012W	PGK1	3	141043	142293	+	GATCATCAAGGAAGTAATTATCTACTTTTTACAACAAATATAAAACAATG	TATTGGAAGGTAAGGAATTGCCAGGTGTTGCTTTCTTATCCGAAAAGAAA	AAAGAGAAAAGAAAAAAATTGATCTATCGATTTCAATTCAATTCAATTTA	GATCATCAAGGAAGTAATTATCTACTTTTTACAACAAATATAAAACAATGCGGATCCCCGGGTTAATTAA	TATTGGAAGGTAAGGAATTGCCAGGTGTTGCTTTCTTATCCGAAAAGAAACGGATCCCCGGGTTAATTAA	AAAGAGAAAAGAAAAAAATTGATCTATCGATTTCAATTCAATTCAATTTAGAATTCGAGCTCGTTTAAAC	1	YCR013C	1	YCR013C	0
YCR013C	YCR013C	3	141699	142346	-	TAAAAAATATTCAAAAAATAAAATAAACTATTATTTTAGCGTAAAGGATG	CACCACCAATGATGATAGAGTCGACCTTGTCCAACAAGTTGTCAATCAAT	AGACCATTCTTGGCCATCTTAGGTGGTGCCAAGGTTGCTGACAAGATTCA	TAAAAAATATTCAAAAAATAAAATAAACTATTATTTTAGCGTAAAGGATGCGGATCCCCGGGTTAATTAA	CACCACCAATGATGATAGAGTCGACCTTGTCCAACAAGTTGTCAATCAATCGGATCCCCGGGTTAATTAA	AGACCATTCTTGGCCATCTTAGGTGGTGCCAAGGTTGCTGACAAGATTCAGAATTCGAGCTCGTTTAAAC	1	YCR012W	1	YCR012W	0
YCR014C	POL4,POLX	3	142482	144230	-	TGATAATAAGTAAAGGATAAACATGCGACCTGTTAGACAAATCGCACATG	AATACGCTGAACCCGAACATAGAAATATCGAATGGGAAAAAAAAACTGCA	TTATTAAGATTTTTATTAAAAAAAAATTCGCTCCTCTTTTAATGCCTTTA	TGATAATAAGTAAAGGATAAACATGCGACCTGTTAGACAAATCGCACATGCGGATCCCCGGGTTAATTAA	AATACGCTGAACCCGAACATAGAAATATCGAATGGGAAAAAAAAACTGCACGGATCCCCGGGTTAATTAA	TTATTAAGATTTTTATTAAAAAAAAATTCGCTCCTCTTTTAATGCCTTTAGAATTCGAGCTCGTTTAAAC	0		0		0
YCR015C	YCR015C	3	144514	145467	-	CCAATGCATTTAACAATTGCAGTAACCAGAAGCGAACAGTGGAGGATATG	TGAAATCCTGGGACTCTTTAAAAGATTTGATCATGCAGGTAACAAAAATG	CAACGTCCTGGTTATATAAATTTGAATATACAGGATTTCATCCGTTTCTA	CCAATGCATTTAACAATTGCAGTAACCAGAAGCGAACAGTGGAGGATATGCGGATCCCCGGGTTAATTAA	TGAAATCCTGGGACTCTTTAAAAGATTTGATCATGCAGGTAACAAAAATGCGGATCCCCGGGTTAATTAA	CAACGTCCTGGTTATATAAATTTGAATATACAGGATTTCATCCGTTTCTAGAATTCGAGCTCGTTTAAAC	0		0		0
YCR016W	YCR016W	3	146931	147803	+	CTTTATCGACAAATTACAAGCAGAAGAAACATTCACTTCACAATTAAATG	AGAATGATGACTCGGAGCAGATAGAACTTAAGAATTTCTTCGTTGATGTT	CACAGTAAAATATATACTACAACTGAACAACGTTGTTGAACTCTATGTTA	CTTTATCGACAAATTACAAGCAGAAGAAACATTCACTTCACAATTAAATGCGGATCCCCGGGTTAATTAA	AGAATGATGACTCGGAGCAGATAGAACTTAAGAATTTCTTCGTTGATGTTCGGATCCCCGGGTTAATTAA	CACAGTAAAATATATACTACAACTGAACAACGTTGTTGAACTCTATGTTAGAATTCGAGCTCGTTTAAAC	0		0		0
YCR017C	CWH43	3	148070	150931	-	CTCGAGGAATAAGTAACCAGGAATACAGAAGGTATCCACCGCCAGTTATG	GTGAGAGGGGTCACTTCTACCATGTTTTTGATGAGCCACGTTATTACTTA	TACACACAATGTGATTACACTGATTTATAAAACCACCTTACGGCCTCTTA	CTCGAGGAATAAGTAACCAGGAATACAGAAGGTATCCACCGCCAGTTATGCGGATCCCCGGGTTAATTAA	GTGAGAGGGGTCACTTCTACCATGTTTTTGATGAGCCACGTTATTACTTACGGATCCCCGGGTTAATTAA	TACACACAATGTGATTACACTGATTTATAAAACCACCTTACGGCCTCTTAGAATTCGAGCTCGTTTAAAC	0		0		0
YCR018C	SRD1	3	151535	152200	-	TGTTAAGAGGTTGCTAGGTAAATAACCAGACATTTACTATTGCTAGTATG	ATGAAAAAAAAAGGCAAGCAGCAGATAAAAGGATAGATCGAAACAATCCA	TCCTAGTGGAAAAATATCATCTATGCGGTGAAAGAATTAAATAGATACTA	TGTTAAGAGGTTGCTAGGTAAATAACCAGACATTTACTATTGCTAGTATGCGGATCCCCGGGTTAATTAA	ATGAAAAAAAAAGGCAAGCAGCAGATAAAAGGATAGATCGAAACAATCCACGGATCCCCGGGTTAATTAA	TCCTAGTGGAAAAATATCATCTATGCGGTGAAAGAATTAAATAGATACTAGAATTCGAGCTCGTTTAAAC	0		0		0
YCR018C-A	YCR018C-A	3	154994	155248	-	GTTTTCAGATCAACATTCAAACACGGTTGTTAGGTGGTTGTTTTCTGATG	TTATCAATCCTTGCACTTCAGCTTCCTCTAACTTCGATGACAGCTTCTCA	TATTNATCAATATATTATCATATACGGTGTTAAGATGATGACATAAGTTA	GTTTTCAGATCAACATTCAAACACGGTTGTTAGGTGGTTGTTTTCTGATGCGGATCCCCGGGTTAATTAA	TTATCAATCCTTGCACTTCAGCTTCCTCTAACTTCGATGACAGCTTCTCACGGATCCCCGGGTTAATTAA	TATTNATCAATATATTATCATATACGGTGTTAAGATGATGACATAAGTTAGAATTCGAGCTCGTTTAAAC	0		0		0
YCR019W	MAK32	3	156223	157314	+	ATTTGATTTAAGAAGTTTACTGTTCTAAGAAAATAAAGAACGTGATAATG	AGTCCGGTCTTCAATATAATATAAACGATCTTTACAAAAGTCTAACACGA	ATGTATATTTTTGCAGAAAAATAAGAGCAATGAACAAGCTGATATGATCA	ATTTGATTTAAGAAGTTTACTGTTCTAAGAAAATAAAGAACGTGATAATGCGGATCCCCGGGTTAATTAA	AGTCCGGTCTTCAATATAATATAAACGATCTTTACAAAAGTCTAACACGACGGATCCCCGGGTTAATTAA	ATGTATATTTTTGCAGAAAAATAAGAGCAATGAACAAGCTGATATGATCAGAATTCGAGCTCGTTTAAAC	0		0		0
YCR020C	PET18,HIT2	3	157398	158045	-	TTTAGCGCAAATAATAACAATATCAACAATATCTGCAAGGAAGAACAATG	TGAAGGTTTCACAGTTCGAGTTCGAATTTTTTGAATCTTGTTACAACGCC	AAAATATACATATATATATATAAGTAAGTGTTATATACTATTTGAGATTA	TTTAGCGCAAATAATAACAATATCAACAATATCTGCAAGGAAGAACAATGCGGATCCCCGGGTTAATTAA	TGAAGGTTTCACAGTTCGAGTTCGAATTTTTTGAATCTTGTTACAACGCCCGGATCCCCGGGTTAATTAA	AAAATATACATATATATATATAAGTAAGTGTTATATACTATTTGAGATTAGAATTCGAGCTCGTTTAAAC	0		0		0
YCR020C-A	MAK31,SMX1,LSM9	3	158216	158482	-	GGGTGAAGATAGTCTTCAACAAACTTAGTAAGGGGCACCAAAGCGTCATG	TTCTGCAGGAGCTTACTGCGAATAAAGTTGAATTGATGGCTAATATTGTT	TTTTTGCCAAGCAATTGTTACTATGGAAACTATTAGAACCATATGCGCTA	GGGTGAAGATAGTCTTCAACAAACTTAGTAAGGGGCACCAAAGCGTCATGCGGATCCCCGGGTTAATTAA	TTCTGCAGGAGCTTACTGCGAATAAAGTTGAATTGATGGCTAATATTGTTCGGATCCCCGGGTTAATTAA	TTTTTGCCAAGCAATTGTTACTATGGAAACTATTAGAACCATATGCGCTAGAATTCGAGCTCGTTTAAAC	0		0		0
YCR020W-B	HTL1	3	158706	158942	+	TAGAACGAAAGGATTGTGTTATTTAGAACAGAGTATCAGTATATCGTATG	TGGAAGAAATGAAAAAAATGCTCGATGCTTTGAAAAATGAAAGGAAAAAG	TTCACATTCAATATTTTGTAGCTTACAATTGTGAATGTTGCGTTTTCCTA	TAGAACGAAAGGATTGTGTTATTTAGAACAGAGTATCAGTATATCGTATGCGGATCCCCGGGTTAATTAA	TGGAAGAAATGAAAAAAATGCTCGATGCTTTGAAAAATGAAAGGAAAAAGCGGATCCCCGGGTTAATTAA	TTCACATTCAATATTTTGTAGCTTACAATTGTGAATGTTGCGTTTTCCTAGAATTCGAGCTCGTTTAAAC	0		0		0
YCR021C	HSP30,YRO1	3	159495	160493	-	GTTTGAGACTTTAATATCTTTTGATTACTAAAAACAACAAATTTCAAATG	CAATCCACGAACCCGAACCTGAAGCAGAGCAAGCTGTCGAAGATACTGCT	TTTGAAATGTGTTAAGCAAAGAATGATTAAGACAATCTCAAGCTGCTCTA	GTTTGAGACTTTAATATCTTTTGATTACTAAAAACAACAAATTTCAAATGCGGATCCCCGGGTTAATTAA	CAATCCACGAACCCGAACCTGAAGCAGAGCAAGCTGTCGAAGATACTGCTCGGATCCCCGGGTTAATTAA	TTTGAAATGTGTTAAGCAAAGAATGATTAAGACAATCTCAAGCTGCTCTAGAATTCGAGCTCGTTTAAAC	0		0		0
YCR022C	YCR022C	3	160807	161151	-	CGTTTTGCATAAGTAAGAATAACTACTTGTGCAGGGTGCCGAAAGGGATG	CTTCGTTATTTCATCATCCCTTTCTGCTATGGCAAGGACAAGTTTTTTTC	TATGAAAACTTTGGCCAATTAGGGAGAGGAAAGTTTTCGATGAGATGCTA	CGTTTTGCATAAGTAAGAATAACTACTTGTGCAGGGTGCCGAAAGGGATGCGGATCCCCGGGTTAATTAA	CTTCGTTATTTCATCATCCCTTTCTGCTATGGCAAGGACAAGTTTTTTTCCGGATCCCCGGGTTAATTAA	TATGAAAACTTTGGCCAATTAGGGAGAGGAAAGTTTTCGATGAGATGCTAGAATTCGAGCTCGTTTAAAC	0		0		0
YCR023C	YCR023C	3	161924	163759	-	AAGGAACTAGGAAGTGGTAAGCATATGAACACACGAATATAAAAGATATG	TGGCTCATCGATCTAGTTTAAGCAGCTTAAGTAACCAACGCTGTACCACA	TTTTTTTATTAGATATCCTTTTTGCAAGCCTTCTGAAAAAAAATTTCTCA	AAGGAACTAGGAAGTGGTAAGCATATGAACACACGAATATAAAAGATATGCGGATCCCCGGGTTAATTAA	TGGCTCATCGATCTAGTTTAAGCAGCTTAAGTAACCAACGCTGTACCACACGGATCCCCGGGTTAATTAA	TTTTTTTATTAGATATCCTTTTTGCAAGCCTTCTGAAAAAAAATTTCTCAGAATTCGAGCTCGTTTAAAC	0		0		0
YCR024C	SLM5	3	164130	165608	-	CGCTTACTAAGAGAGAAAGAAAGAGAACAAGCGAATACAAACAGCTAATG	TAAAGGATGCCATACCCTTTTATAGAACATCTGCAGAATCCATCGATTTT	TGAACAGTGAGTAAATACATAGAAGGAGATAAGAAACAAATGGAATATCA	CGCTTACTAAGAGAGAAAGAAAGAGAACAAGCGAATACAAACAGCTAATGCGGATCCCCGGGTTAATTAA	TAAAGGATGCCATACCCTTTTATAGAACATCTGCAGAATCCATCGATTTTCGGATCCCCGGGTTAATTAA	TGAACAGTGAGTAAATACATAGAAGGAGATAAGAAACAAATGGAATATCAGAATTCGAGCTCGTTTAAAC	0		0		0
YCR024C-B	YCR024C-B	3	165985	166250	-	CCCTTCATCTTTGTTTATATCCATTCTAGAACATGAATTAGACTACTATG	TCCAAATTGTTCGCTTTTTTCCTTTTATCACTATTATTTTTTTCCACTCT	AGTTATCATGAGGAGTCATCAGCCAGACTTAACAATCACACACATTGTTA	CCCTTCATCTTTGTTTATATCCATTCTAGAACATGAATTAGACTACTATGCGGATCCCCGGGTTAATTAA	TCCAAATTGTTCGCTTTTTTCCTTTTATCACTATTATTTTTTTCCACTCTCGGATCCCCGGGTTAATTAA	AGTTATCATGAGGAGTCATCAGCCAGACTTAACAATCACACACATTGTTAGAATTCGAGCTCGTTTAAAC	0		0		0
YCR024C-A	PMP1	3	166330	166452	-	TTGTTTGTTTCTCCTCTTCCCATTTCAGCACTTTTAATCTATCATAAATG	CCATTATCTACAGAAAATGGCAAGCTAGACAAAGAGGATTGCAAAGATTC	AACAAAGATGAAGGGGACAGGAAATAAAATGGCTCGCTCCGCCATTTTTA	TTGTTTGTTTCTCCTCTTCCCATTTCAGCACTTTTAATCTATCATAAATGCGGATCCCCGGGTTAATTAA	CCATTATCTACAGAAAATGGCAAGCTAGACAAAGAGGATTGCAAAGATTCCGGATCCCCGGGTTAATTAA	AACAAAGATGAAGGGGACAGGAAATAAAATGGCTCGCTCCGCCATTTTTAGAATTCGAGCTCGTTTAAAC	0		0		0
YCR025C	YCR025C	3	166830	167240	-	ACAAGCTGAAACTAGGCGTGTTAACTCTTTCCTAAACGAGGAGGTTTATG	CAAACAGAAAGCAGAAAGCAGAAAGATGTCAATATAGACTTGTCACTGCG	AAAAAAAATGGGAAATTATTATCGGAAAAAATTGAAGCTATCTTCTATTA	ACAAGCTGAAACTAGGCGTGTTAACTCTTTCCTAAACGAGGAGGTTTATGCGGATCCCCGGGTTAATTAA	CAAACAGAAAGCAGAAAGCAGAAAGATGTCAATATAGACTTGTCACTGCGCGGATCCCCGGGTTAATTAA	AAAAAAAATGGGAAATTATTATCGGAAAAAATTGAAGCTATCTTCTATTAGAATTCGAGCTCGTTTAAAC	0		0		0
YCR026C	NPP1	3	167495	169720	-	GTAAATACATATATCTGAAAAGAGGTACAGTATAACACTCTCTATAAATG	TCATTGACGACATAATTGACAGCATCGACGATTTAGTCGATTCTGATACC	ACAAGGATGCGTCTTTTATTTCATAACGCGGTTGTCCCACCTTAAGCTTA	GTAAATACATATATCTGAAAAGAGGTACAGTATAACACTCTCTATAAATGCGGATCCCCGGGTTAATTAA	TCATTGACGACATAATTGACAGCATCGACGATTTAGTCGATTCTGATACCCGGATCCCCGGGTTAATTAA	ACAAGGATGCGTCTTTTATTTCATAACGCGGTTGTCCCACCTTAAGCTTAGAATTCGAGCTCGTTTAAAC	0		0		0
YCR027C	RHB1,RSG1	3	170753	171382	-	AACAGTTTTATTGGGGCACGGCGAGAAAAGATATAACCTGTGACATAATG	AAGGAACTCTGGGGCTTGATGCCGAAAATAATAATAAATGTTCTATAATG	GCTTTCCTACTAATAAAACCAATGATATCCTAGGGACGCTCGAGTTTTCA	AACAGTTTTATTGGGGCACGGCGAGAAAAGATATAACCTGTGACATAATGCGGATCCCCGGGTTAATTAA	AAGGAACTCTGGGGCTTGATGCCGAAAATAATAATAAATGTTCTATAATGCGGATCCCCGGGTTAATTAA	GCTTTCCTACTAATAAAACCAATGATATCCTAGGGACGCTCGAGTTTTCAGAATTCGAGCTCGTTTAAAC	0		0		0
YCR028C	FEN2	3	173238	174776	-	GAAGCTGTTTTCAGAATTTTTGATTGGAGAGAGCCTGGGCCTAAGTCATG	AAGTTGAACTTCATAATGAGGAAATGGCCGAAATTTCAAATCCTTTCCGA	CATTACCATCAACAGGACCAATGAATAGCTACAAGAATCGAATGTATTTA	GAAGCTGTTTTCAGAATTTTTGATTGGAGAGAGCCTGGGCCTAAGTCATGCGGATCCCCGGGTTAATTAA	AAGTTGAACTTCATAATGAGGAAATGGCCGAAATTTCAAATCCTTTCCGACGGATCCCCGGGTTAATTAA	CATTACCATCAACAGGACCAATGAATAGCTACAAGAATCGAATGTATTTAGAATTCGAGCTCGTTTAAAC	0		0		0
YCR028C-A	RIM1	3	175303	175793	-	TGTCCTTGACAAATACAAAACAAACAAAAATCCACTAATCCATTGTAATG	GGAAGAAATTAGAAGATGCTGAGGGCCAAGAAAATGCTGCTTCTTCAGAA	AAAAAATATCGAGGAAGAGTCGAAATAAGCAAGCGTAAATATTACAATTA	TGTCCTTGACAAATACAAAACAAACAAAAATCCACTAATCCATTGTAATGCGGATCCCCGGGTTAATTAA	GGAAGAAATTAGAAGATGCTGAGGGCCAAGAAAATGCTGCTTCTTCAGAACGGATCCCCGGGTTAATTAA	AAAAAATATCGAGGAAGAGTCGAAATAAGCAAGCGTAAATATTACAATTAGAATTCGAGCTCGTTTAAAC	0		0		0
YCR030C	SYP1,YCR029C-A	3	176178	178789	-	GTCGTATTGAAGCAAGCTTATTTGAAAATTGCGAATAATCACCTCTCATG	ATGTAAACACAAAAAGAACTTTGACTACTGGTAACTACCATGGTCTCGCT	AAACAAAAGAACAATTAATATTGAAAAATAGAAGCATAGCAGAAATATCA	GTCGTATTGAAGCAAGCTTATTTGAAAATTGCGAATAATCACCTCTCATGCGGATCCCCGGGTTAATTAA	ATGTAAACACAAAAAGAACTTTGACTACTGGTAACTACCATGGTCTCGCTCGGATCCCCGGGTTAATTAA	AAACAAAAGAACAATTAATATTGAAAAATAGAAGCATAGCAGAAATATCAGAATTCGAGCTCGTTTAAAC	0		0		0
YCR031C	RPS14A,RPL59,CRY1	3	179851	180570	-	GATTCTATTTTAAACCCAAGGAGAGTAAGAAACCACAAGAACCCGCCATG	TTCCATCTGACTCCACCAGAAAGAAGGGTGGTAGAAGAGGTAGAAGATTA	TAACTGTAAAAAATAATACGGCAATACAAGTACAATACATGCATAACTCA	GATTCTATTTTAAACCCAAGGAGAGTAAGAAACCACAAGAACCCGCCATGCGGATCCCCGGGTTAATTAA	TTCCATCTGACTCCACCAGAAAGAAGGGTGGTAGAAGAGGTAGAAGATTACGGATCCCCGGGTTAATTAA	TAACTGTAAAAAATAATACGGCAATACAAGTACAATACATGCATAACTCAGAATTCGAGCTCGTTTAAAC	0		0		0
YCR032W	BPH1	3	181872	188375	+	CCAATTGGTTCTTTCTCCTTTCTGCCAAAAAAAAACACAATACGGATATG	AGATAGAAGTGATTGCGGGAACATTAGATGGCAGATTAGCTATTTGGTAC	AACTACAAAAATTGAATCATTTAAAGAAAGGCGTTACGATGTCATGCCTA	CCAATTGGTTCTTTCTCCTTTCTGCCAAAAAAAAACACAATACGGATATGCGGATCCCCGGGTTAATTAA	AGATAGAAGTGATTGCGGGAACATTAGATGGCAGATTAGCTATTTGGTACCGGATCCCCGGGTTAATTAA	AACTACAAAAATTGAATCATTTAAAGAAAGGCGTTACGATGTCATGCCTAGAATTCGAGCTCGTTTAAAC	0		0		0
YCR033W	SNT1	3	188841	192521	+	TACTAACTTGTGCATAGAACAGCAAACAGAAACAAAGCGTAAGAAACATG	CCGCGCCAGATGCAATGAGCAGTTTTTTATCTAAAAAGGAAAATAATAAT	GATGGAAAAGAAGTAGAGCATATGTATTGCCCGTCTCAGCCGTTTGTTCA	TACTAACTTGTGCATAGAACAGCAAACAGAAACAAAGCGTAAGAAACATGCGGATCCCCGGGTTAATTAA	CCGCGCCAGATGCAATGAGCAGTTTTTTATCTAAAAAGGAAAATAATAATCGGATCCCCGGGTTAATTAA	GATGGAAAAGAAGTAGAGCATATGTATTGCCCGTCTCAGCCGTTTGTTCAGAATTCGAGCTCGTTTAAAC	0		0		0
YCR034W	FEN1,VBM2,GNS1,ELO2	3	192940	193983	+	TTTGTACAAAGTGAAAAGGTTGAATTAATTATCTTCGTCTAGAAGCCATG	ACGTTCCTACTCCATCTCCATCACCAAAACCTCAACACAGAAGAAAAAGG	CGAATATACGAAAGTTGAATACTTAAATTCTTTCAAAGATTTTACACTTA	TTTGTACAAAGTGAAAAGGTTGAATTAATTATCTTCGTCTAGAAGCCATGCGGATCCCCGGGTTAATTAA	ACGTTCCTACTCCATCTCCATCACCAAAACCTCAACACAGAAGAAAAAGGCGGATCCCCGGGTTAATTAA	CGAATATACGAAAGTTGAATACTTAAATTCTTTCAAAGATTTTACACTTAGAATTCGAGCTCGTTTAAAC	0		0		0
YCR035C	RRP43	3	194182	195366	-	TATACAAATAAGTTTGACAGTAGTTTCACAGGCATCTAATATTGGAAATG	TGTTGTTATCTAGGGTTAGAGCGGACGATTTGTCAACAAGATTTAACATA	TTTTCCGTTTCCTTTCGACAGTCATCAGATAATTTTATCCGAGTCTTTTA	TATACAAATAAGTTTGACAGTAGTTTCACAGGCATCTAATATTGGAAATGCGGATCCCCGGGTTAATTAA	TGTTGTTATCTAGGGTTAGAGCGGACGATTTGTCAACAAGATTTAACATACGGATCCCCGGGTTAATTAA	TTTTCCGTTTCCTTTCGACAGTCATCAGATAATTTTATCCGAGTCTTTTAGAATTCGAGCTCGTTTAAAC	0		0		0
YCR036W	RBK1	3	195645	196646	+	GATGTTTGTTGTCTTTCATCCCAAAGTTCCAACAGCATATTTCAGAGATG	AAGGTGCTGCTGAAAGCATGCCACTGTATAAAGATGTTCAGAAAGATGCA	CGAAAACTAAAATTTAACAAACTAAAAGTAAAAAATTGCAGTAGATTTTA	GATGTTTGTTGTCTTTCATCCCAAAGTTCCAACAGCATATTTCAGAGATGCGGATCCCCGGGTTAATTAA	AAGGTGCTGCTGAAAGCATGCCACTGTATAAAGATGTTCAGAAAGATGCACGGATCCCCGGGTTAATTAA	CGAAAACTAAAATTTAACAAACTAAAAGTAAAAAATTGCAGTAGATTTTAGAATTCGAGCTCGTTTAAAC	0		0		0
YCR037C	PHO87	3	196762	199533	-	AAGGTGCAGCAAAACTACGGTAAAGGCGGCTATTATTGTGCCTCGAAATG	TGATTACTCTCGGTTATGGTATTAGTTCTTCCGTCTTAAAAGGTAGCACT	AGGTACAAAGAATGCAGTAATAAGAAATGTAATTACATGAGGGCAGTTTA	AAGGTGCAGCAAAACTACGGTAAAGGCGGCTATTATTGTGCCTCGAAATGCGGATCCCCGGGTTAATTAA	TGATTACTCTCGGTTATGGTATTAGTTCTTCCGTCTTAAAAGGTAGCACTCGGATCCCCGGGTTAATTAA	AGGTACAAAGAATGCAGTAATAAGAAATGTAATTACATGAGGGCAGTTTAGAATTCGAGCTCGTTTAAAC	0		0		0
YCR038C	BUD5	3	199986	201914	-	GAATTAGCGGACCTCTTGAGCGGTGAGCCTCTGGCAAAGAAGAAAGAATG	ACAAAGACAGGGCGTATCAAGTCAGTATAGCTAAGGTTCCAAGGCTTACC	CGTACAAGAAGCAAAAGGAAGTCATCTTTCTTTGAACAGTTCTGTTTTTA	GAATTAGCGGACCTCTTGAGCGGTGAGCCTCTGGCAAAGAAGAAAGAATGCGGATCCCCGGGTTAATTAA	ACAAAGACAGGGCGTATCAAGTCAGTATAGCTAAGGTTCCAAGGCTTACCCGGATCCCCGGGTTAATTAA	CGTACAAGAAGCAAAAGGAAGTCATCTTTCTTTGAACAGTTCTGTTTTTAGAATTCGAGCTCGTTTAAAC	2	YCR038W-A;YCR039C	2	YCR038W-A;YCR039C	0
YCR038W-A	YCR038W-A	3	201658	201783	+	GGATTTTTTTTGGGACGATATTGTCATTATAGGGCAGTGTGTGACTTATG	CCTGGATAGCGAAGCGTGCGGTTACAAATAGGTCGTCTTGTTCAAGAAGG	TCCTCAGACACTACTAAGATGTTTGTACTGATAGATAATGTCCTCGCCTA	GGATTTTTTTTGGGACGATATTGTCATTATAGGGCAGTGTGTGACTTATGCGGATCCCCGGGTTAATTAA	CCTGGATAGCGAAGCGTGCGGTTACAAATAGGTCGTCTTGTTCAAGAAGGCGGATCCCCGGGTTAATTAA	TCCTCAGACACTACTAAGATGTTTGTACTGATAGATAATGTCCTCGCCTAGAATTCGAGCTCGTTTAAAC	1	YCR038C	1	YCR038C	0
YCR039C	MATALPHA2,ALPHA2	3	201911	202543	-	ATCAGCTTAGAAGTGGGCAAGAAAAAAAGGAAGATAAGCAAGAAAAAATG	CAGAATTAGCGGACCTCTTGAGCGGTGAGCCTCTGGCAAAGAAGAAAGAA	TATATATATATATTCTACACAGATATATACATATTTGTTTTTCGGGCTCA	ATCAGCTTAGAAGTGGGCAAGAAAAAAAGGAAGATAAGCAAGAAAAAATGCGGATCCCCGGGTTAATTAA	CAGAATTAGCGGACCTCTTGAGCGGTGAGCCTCTGGCAAAGAAGAAAGAACGGATCCCCGGGTTAATTAA	TATATATATATATTCTACACAGATATATACATATTTGTTTTTCGGGCTCAGAATTCGAGCTCGTTTAAAC	1	YCR038C	1	YCR038C	0
YCR040W	MATALPHA1,ALPHA1	3	202807	203334	+	GAAATGTATCAACCATATATAATAACTTAATAGACGACATTCACAATATG	AAGTACGTGGTGACGGATATTGGGAAGATGTGTTTGTACATTTGGCCTTA	CAACATTCAGTACTCGAAAGATAAACAACCTCCGCCACGACCACACTCTA	GAAATGTATCAACCATATATAATAACTTAATAGACGACATTCACAATATGCGGATCCCCGGGTTAATTAA	AAGTACGTGGTGACGGATATTGGGAAGATGTGTTTGTACATTTGGCCTTACGGATCCCCGGGTTAATTAA	CAACATTCAGTACTCGAAAGATAAACAACCTCCGCCACGACCACACTCTAGAATTCGAGCTCGTTTAAAC	1	YCR041W	1	YCR041W	0
YCR041W	YCR041W	3	203276	203608	+	TTTTATAAACCCTGGTTTTGGTTTTGTAGAGTGGTTGACGAATAATTATG	TCTTCGTTCTTATCTTAACCATAAACGATCTTGATGTGACTTTTGTAATT	CCTAGAGTAATGGTGCATTTGTCATCCGTCCCATATAGCCAATTCGTTCA	TTTTATAAACCCTGGTTTTGGTTTTGTAGAGTGGTTGACGAATAATTATGCGGATCCCCGGGTTAATTAA	TCTTCGTTCTTATCTTAACCATAAACGATCTTGATGTGACTTTTGTAATTCGGATCCCCGGGTTAATTAA	CCTAGAGTAATGGTGCATTTGTCATCCGTCCCATATAGCCAATTCGTTCAGAATTCGAGCTCGTTTAAAC	2	YCR040W;YCR042C	2	YCR040W;YCR042C	0
YCR042C	TAF2,TSM1,TAF150	3	203539	207756	-	AGTTTTGGACAGTGAAGAGGTGACAACAGGATAAATAGGTGGACTCCATG	CATCAAGATCGTTTATGGTTAAGATAAGAACGAAGAAGGATGCTAAGAAT	CTATGTATTTGTATAAAATACGATATTACTCAGACTCAAGCAAACATTCA	AGTTTTGGACAGTGAAGAGGTGACAACAGGATAAATAGGTGGACTCCATGCGGATCCCCGGGTTAATTAA	CATCAAGATCGTTTATGGTTAAGATAAGAACGAAGAAGGATGCTAAGAATCGGATCCCCGGGTTAATTAA	CTATGTATTTGTATAAAATACGATATTACTCAGACTCAAGCAAACATTCAGAATTCGAGCTCGTTTAAAC	1	YCR041W	1	YCR041W	0
YCR043C	YCR043C	3	208619	209002	-	GGGCAACAGTAGGCAGTGAAAGCGCTCTTAACGTACTTTGGCAAAGGATG	ACGACTTTAAGATGGAAGGAGGTGATTTAGAGTACCAACATGTAAAGATC	TTCCTTCCAAACTAGCAGTAATAAGTCGTCCTGAGAACGATGTAGATTTA	GGGCAACAGTAGGCAGTGAAAGCGCTCTTAACGTACTTTGGCAAAGGATGCGGATCCCCGGGTTAATTAA	ACGACTTTAAGATGGAAGGAGGTGATTTAGAGTACCAACATGTAAAGATCCGGATCCCCGGGTTAATTAA	TTCCTTCCAAACTAGCAGTAATAAGTCGTCCTGAGAACGATGTAGATTTAGAATTCGAGCTCGTTTAAAC	0		0		0
YCR044C	PER1,COS16	3	209235	210308	-	AAACCATACCCTTCGGGAGAAAAGAAACAGCAAGTGTGGCAAGAAATATG	ACGACTTTTTCCTCGAGGATTATGCCTATTGGGGTAATAGACAATTGTAC	ACATATATAACTATTATTCATGATAGCAAACAGGTGAATTAAGATATTTA	AAACCATACCCTTCGGGAGAAAAGAAACAGCAAGTGTGGCAAGAAATATGCGGATCCCCGGGTTAATTAA	ACGACTTTTTCCTCGAGGATTATGCCTATTGGGGTAATAGACAATTGTACCGGATCCCCGGGTTAATTAA	ACATATATAACTATTATTCATGATAGCAAACAGGTGAATTAAGATATTTAGAATTCGAGCTCGTTTAAAC	0		0		0
YCR045C	YCR045C	3	210490	211965	-	GACATCCTCCAACATCCGCCAAGGAAAACAGCAAAAAAACCCTGGTCATG	TACCTCTTGGTGAGATTCGATTGAAGAGGCGTGATTTTATGAAAAATTTG	ATGTTGAAATTATGCAATAATTTATTTATGAGAGAAAGAGAAAAACACTA	GACATCCTCCAACATCCGCCAAGGAAAACAGCAAAAAAACCCTGGTCATGCGGATCCCCGGGTTAATTAA	TACCTCTTGGTGAGATTCGATTGAAGAGGCGTGATTTTATGAAAAATTTGCGGATCCCCGGGTTAATTAA	ATGTTGAAATTATGCAATAATTTATTTATGAGAGAAAGAGAAAAACACTAGAATTCGAGCTCGTTTAAAC	1	YCR045W-A	1	YCR045W-A	0
YCR045W-A	YCR045W-A	3	211106	211456	+	CTAAATTGAAGTTCCCCGCCGCGGCAACAAATACAATACCTTCTTCAATG	CTCTGTCTTCGAATTCCGGATGGTCCGCGAAGATACCCGTATCCATGATA	TTCAACTACTACTATGAACACGACTATCAAGGTCAAGACGTCAACGCCTA	CTAAATTGAAGTTCCCCGCCGCGGCAACAAATACAATACCTTCTTCAATGCGGATCCCCGGGTTAATTAA	CTCTGTCTTCGAATTCCGGATGGTCCGCGAAGATACCCGTATCCATGATACGGATCCCCGGGTTAATTAA	TTCAACTACTACTATGAACACGACTATCAAGGTCAAGACGTCAACGCCTAGAATTCGAGCTCGTTTAAAC	1	YCR045C	1	YCR045C	0
YCR046C	IMG1	3	212270	212779	-	GGGTCTTCCCTCTGAGCAGCTGCTGAAAGAGAGAGAGAACCATAGCGATG	GTACAAGGTTGGATGTCGGCGACCTGGAGGCAGGTCTAAGAAGAAAGAAA	TTTTTCTTATATACAGGAGATGGGTGGCCACAGAACCCGCGCCTAGCCTA	GGGTCTTCCCTCTGAGCAGCTGCTGAAAGAGAGAGAGAACCATAGCGATGCGGATCCCCGGGTTAATTAA	GTACAAGGTTGGATGTCGGCGACCTGGAGGCAGGTCTAAGAAGAAAGAAACGGATCCCCGGGTTAATTAA	TTTTTCTTATATACAGGAGATGGGTGGCCACAGAACCCGCGCCTAGCCTAGAATTCGAGCTCGTTTAAAC	0		0		0
YCR047C	BUD23	3	213071	213898	-	AAAAAGGTGCGGTACGGAACCACAGGAAATATATCAGAGAAGAAGTAATG	AAGTTGCGAAGGACTCCAAGTTCACCGGGAGGAAAAGAAGACACAGGTTC	TTTTTATAGTATACAAAAGAATATGCGTGTGAGGATGTGTGTTTCTTCTA	AAAAAGGTGCGGTACGGAACCACAGGAAATATATCAGAGAAGAAGTAATGCGGATCCCCGGGTTAATTAA	AAGTTGCGAAGGACTCCAAGTTCACCGGGAGGAAAAGAAGACACAGGTTCCGGATCCCCGGGTTAATTAA	TTTTTATAGTATACAAAAGAATATGCGTGTGAGGATGTGTGTTTCTTCTAGAATTCGAGCTCGTTTAAAC	1	YCR047W-A	1	YCR047W-A	0
YCR047W-A	YCR047W-A	3	213654	213860	+	GCAACATCAAGTCGCCCTCCAGCTCTCTACTAAGACCGGTCGCAAGCATG	TATGCTGCACTCTGGTCGAACCCGTGTACTTGTGTGCTTCGCTATCATTA	GAAGAAGTAATGTCACGTCCTGAGGAGTTGGCACCACCGGAGATTTTCTA	GCAACATCAAGTCGCCCTCCAGCTCTCTACTAAGACCGGTCGCAAGCATGCGGATCCCCGGGTTAATTAA	TATGCTGCACTCTGGTCGAACCCGTGTACTTGTGTGCTTCGCTATCATTACGGATCCCCGGGTTAATTAA	GAAGAAGTAATGTCACGTCCTGAGGAGTTGGCACCACCGGAGATTTTCTAGAATTCGAGCTCGTTTAAAC	1	YCR047C	1	YCR047C	0
YCR049C	YCR049C	3	214223	214669	-	GTTTCTCCAGCACCGGACCTTTGAAAGTCGTCTGGAAGGGCACATTGATG	CAATCTGTTTTGGCGCTCTTGCTGCAAGCCGTGCTGAACAACCACCTGCG	TATAAGAAGGACGAGCGTGGTGGAGGAAAGGGGCGCCATTGGCACACTCA	GTTTCTCCAGCACCGGACCTTTGAAAGTCGTCTGGAAGGGCACATTGATGCGGATCCCCGGGTTAATTAA	CAATCTGTTTTGGCGCTCTTGCTGCAAGCCGTGCTGAACAACCACCTGCGCGGATCCCCGGGTTAATTAA	TATAAGAAGGACGAGCGTGGTGGAGGAAAGGGGCGCCATTGGCACACTCAGAATTCGAGCTCGTTTAAAC	1	YCR048W	1	YCR048W	0
YCR048W	ARE1,SAT2	3	214281	216113	+	GTTGTTCAGCACGGCTTGCAGCAAGAGCGCCAAAACAGATTGCAAGAATG	TTGGTATCTGTTCAGGGCCCAGTATCATTATGACGTTGTACCTGACCTTA	TATATCTATCAAGGGCTTGCGAGGGACACACGTGGTATGGCGGCAGTTCA	GTTGTTCAGCACGGCTTGCAGCAAGAGCGCCAAAACAGATTGCAAGAATGCGGATCCCCGGGTTAATTAA	TTGGTATCTGTTCAGGGCCCAGTATCATTATGACGTTGTACCTGACCTTACGGATCCCCGGGTTAATTAA	TATATCTATCAAGGGCTTGCGAGGGACACACGTGGTATGGCGGCAGTTCAGAATTCGAGCTCGTTTAAAC	2	YCR049C;YCR050C	2	YCR049C;YCR050C	0
YCR050C	YCR050C	3	215816	216124	-	ATTCCCTATTGTATATCTATCAAGGGCTTGCGAGGGACACACGTGGTATG	AATGCAATGCGCCCATGGAGCTGTGGTACACGTGTCTTAGTAAAAATTTG	AATTGCGTTTCGTTTGAAGAGTTTAGCAGAATCTGGAACGTCCCCGTTCA	ATTCCCTATTGTATATCTATCAAGGGCTTGCGAGGGACACACGTGGTATGCGGATCCCCGGGTTAATTAA	AATGCAATGCGCCCATGGAGCTGTGGTACACGTGTCTTAGTAAAAATTTGCGGATCCCCGGGTTAATTAA	AATTGCGTTTCGTTTGAAGAGTTTAGCAGAATCTGGAACGTCCCCGTTCAGAATTCGAGCTCGTTTAAAC	1	YCR048W	1	YCR048W	0
YCR051W	YCR051W	3	216422	217090	+	GTTTGCAGGTGACAAAAATCGATGATTTTAGGTGTTGTGACGACAAAATG	AGGGCTCCATGGCGGGTTCCGGGGACGAACCAGATTCCAAGAGAAGAAAA	GCGTTCAATTTCTTTTAGCAAGCTATAAGAGCCTTTGTGCTGGGCCGTTA	GTTTGCAGGTGACAAAAATCGATGATTTTAGGTGTTGTGACGACAAAATGCGGATCCCCGGGTTAATTAA	AGGGCTCCATGGCGGGTTCCGGGGACGAACCAGATTCCAAGAGAAGAAAACGGATCCCCGGGTTAATTAA	GCGTTCAATTTCTTTTAGCAAGCTATAAGAGCCTTTGTGCTGGGCCGTTAGAATTCGAGCTCGTTTAAAC	0		0		0
YCR052W	RSC6	3	217345	218796	+	CAAGGCAGCTTCGTATAGTAATACAGCACGAAAAACAGCTCATAGAAATG	ACAGGTCACTAATGGGCAATATCTCACTACTCTACTCCCAAGGAAGACTA	GAGGCGGCGTGCAATAATTGCAGAAAGAATGAGATCATACAGTGATGTTA	CAAGGCAGCTTCGTATAGTAATACAGCACGAAAAACAGCTCATAGAAATGCGGATCCCCGGGTTAATTAA	ACAGGTCACTAATGGGCAATATCTCACTACTCTACTCCCAAGGAAGACTACGGATCCCCGGGTTAATTAA	GAGGCGGCGTGCAATAATTGCAGAAAGAATGAGATCATACAGTGATGTTAGAATTCGAGCTCGTTTAAAC	0		0		0
YCR053W	THR4	3	219047	220591	+	TATAGCAGCAAATATTTGTTCTTAGACGGCCACCATCCCTCACACCAATG	TTGAATTGGTCAAAAACGCTATTGAAGAAGAACTTGCTAAAATGAAATTA	TTCTATATGTTATATAAGATAAAATATATTCATTAAAAAGGAAGATCTTA	TATAGCAGCAAATATTTGTTCTTAGACGGCCACCATCCCTCACACCAATGCGGATCCCCGGGTTAATTAA	TTGAATTGGTCAAAAACGCTATTGAAGAAGAACTTGCTAAAATGAAATTACGGATCCCCGGGTTAATTAA	TTCTATATGTTATATAAGATAAAATATATTCATTAAAAAGGAAGATCTTAGAATTCGAGCTCGTTTAAAC	0		0		0
YCR054C	CTR86	3	220726	222417	-	CCTTATAAAATTATTGATTCGTCAAAAAAGAAGACAACTAAATAACAATG	AAGAAGACCCTGGGAACGAGAATTCTGAGATTATTAGCATAGATGAAGAT	ATGTTAATCAAAGTGAATCATGATTGCGAGAGTAAGGAACCATCAAATTA	CCTTATAAAATTATTGATTCGTCAAAAAAGAAGACAACTAAATAACAATGCGGATCCCCGGGTTAATTAA	AAGAAGACCCTGGGAACGAGAATTCTGAGATTATTAGCATAGATGAAGATCGGATCCCCGGGTTAATTAA	ATGTTAATCAAAGTGAATCATGATTGCGAGAGTAAGGAACCATCAAATTAGAATTCGAGCTCGTTTAAAC	0		0		0
YCR057C	PWP2,UTP1,YCR058C,YCR055C	3	222807	225578	-	TTCAACAGGTAGACAGGAGAGCAGACCGCAGATTGAACCACATCCCAATG	CTAATGAAAATGATTCCAGTGATGAAGAAGAAGATGAGAAAGAGCTTCCT	GGAATACATGATGTGAATGTGCATAAATAGAGGACAGTGAATATTTTTCA	TTCAACAGGTAGACAGGAGAGCAGACCGCAGATTGAACCACATCCCAATGCGGATCCCCGGGTTAATTAA	CTAATGAAAATGATTCCAGTGATGAAGAAGAAGATGAGAAAGAGCTTCCTCGGATCCCCGGGTTAATTAA	GGAATACATGATGTGAATGTGCATAAATAGAGGACAGTGAATATTTTTCAGAATTCGAGCTCGTTTAAAC	0		0		0
YCR059C	YIH1	3	225802	226578	-	AGGAATATGTAACAAGAAAAAAAAAAGAGAGAGGAAAGAAAAGCTCAATG	ACATCAATTCTACGGCAAGAGAAGCTGTTGTCAGGGCCGGCTTCGACTCG	CCGTCGCATGTGATCAAGGTTACAGGTACTTGACATAATCATAATGATTA	AGGAATATGTAACAAGAAAAAAAAAAGAGAGAGGAAAGAAAAGCTCAATGCGGATCCCCGGGTTAATTAA	ACATCAATTCTACGGCAAGAGAAGCTGTTGTCAGGGCCGGCTTCGACTCGCGGATCCCCGGGTTAATTAA	CCGTCGCATGTGATCAAGGTTACAGGTACTTGACATAATCATAATGATTAGAATTCGAGCTCGTTTAAAC	0		0		0
YCR060W	TAH1	3	226751	227086	+	GGTTTTTTCTTTTCAGCACTGCGAAAGAGAGAGCAACGGTAAAGAGCATG	AGATCCCTGTTGTAGAGGTTGATGAACTACCGGAGGGATACGACCGGTCC	TATATATAATTTTAAAGATAAATTAGAAGTGTTCCCTTTCTCTTTTCTCA	GGTTTTTTCTTTTCAGCACTGCGAAAGAGAGAGCAACGGTAAAGAGCATGCGGATCCCCGGGTTAATTAA	AGATCCCTGTTGTAGAGGTTGATGAACTACCGGAGGGATACGACCGGTCCCGGATCCCCGGGTTAATTAA	TATATATAATTTTAAAGATAAATTAGAAGTGTTCCCTTTCTCTTTTCTCAGAATTCGAGCTCGTTTAAAC	0		0		0
YCR061W	YCR061W	3	227915	229804	+	TGCATTGTACTCTTAATACCCCAACCAAAAACAAAATAGTGACAGTAATG	TTTTATTTATTTGGAAAGACTGGCTCATCAAAACCAGGAAAACCAGTCTT	GATGAGGGGGGTGAAAAAAAAAGAAAAAAGAAAAGCCATTATGGCGGTTA	TGCATTGTACTCTTAATACCCCAACCAAAAACAAAATAGTGACAGTAATGCGGATCCCCGGGTTAATTAA	TTTTATTTATTTGGAAAGACTGGCTCATCAAAACCAGGAAAACCAGTCTTCGGATCCCCGGGTTAATTAA	GATGAGGGGGGTGAAAAAAAAAGAAAAAAGAAAAGCCATTATGGCGGTTAGAATTCGAGCTCGTTTAAAC	0		0		0
YCR064C	YCR064C	3	230774	231184	-	CGTAAAGGTCTTTGGAGATGGCCTTTCTCTTGTAGTACAGAGTATATATG	CCACAACGCGTGTGATTAATCTTGTACTGGTTGTAAATGTGCTAAGTCTG	TTTTTTAAAAATAACATCGTTGATTAAAACAATCCTATTCACTGCAGTCA	CGTAAAGGTCTTTGGAGATGGCCTTTCTCTTGTAGTACAGAGTATATATGCGGATCCCCGGGTTAATTAA	CCACAACGCGTGTGATTAATCTTGTACTGGTTGTAAATGTGCTAAGTCTGCGGATCCCCGGGTTAATTAA	TTTTTTAAAAATAACATCGTTGATTAAAACAATCCTATTCACTGCAGTCAGAATTCGAGCTCGTTTAAAC	1	YCR063W	1	YCR063W	0
YCR063W	BUD31,CWC14	3	230997	231470	+	CACCTCTACAGCCGTCAAGAATAGCAAAGCTCACCTCACAAAACGACATG	CCTTCCATCAGTGCGTCCACTGCGGCTGCCGTGGATGTGCAAGCACAGAC	AGAGATAATTACATGGCCAGAACAATACTGCAACGTGCATATAGTCGTTA	CACCTCTACAGCCGTCAAGAATAGCAAAGCTCACCTCACAAAACGACATGCGGATCCCCGGGTTAATTAA	CCTTCCATCAGTGCGTCCACTGCGGCTGCCGTGGATGTGCAAGCACAGACCGGATCCCCGGGTTAATTAA	AGAGATAATTACATGGCCAGAACAATACTGCAACGTGCATATAGTCGTTAGAATTCGAGCTCGTTTAAAC	1	YCR064C	1	YCR064C	0
YCR065W	HCM1	3	231988	233682	+	TATTTCGAAGCAAGAAAAAAAAAATCAACAAAAATTCCAACTTTTCAATG	ATCATCCTTATCATAATCACCCTTCCAACGATAGCGGTAATGAAAAGAAT	ATAATTAGTTTTCGGTGAGGAAAAGAAAATGAAAAAAAAAAAAAAAGTCA	TATTTCGAAGCAAGAAAAAAAAAATCAACAAAAATTCCAACTTTTCAATGCGGATCCCCGGGTTAATTAA	ATCATCCTTATCATAATCACCCTTCCAACGATAGCGGTAATGAAAAGAATCGGATCCCCGGGTTAATTAA	ATAATTAGTTTTCGGTGAGGAAAAGAAAATGAAAAAAAAAAAAAAAGTCAGAATTCGAGCTCGTTTAAAC	0		0		0
YCR066W	RAD18	3	234174	235637	+	CGCAAGTGAGCATCACAGCTACTAAGAAAAGGCCATTTTTACTACTCATG	GAGAATTAATGGACTTGAATGAGTATAGTAAAGACCCACCCGGTAACAAT	ACAAATGTGCACAAGCTAACAAACAGGCCTGATTACATATACACACCTTA	CGCAAGTGAGCATCACAGCTACTAAGAAAAGGCCATTTTTACTACTCATGCGGATCCCCGGGTTAATTAA	GAGAATTAATGGACTTGAATGAGTATAGTAAAGACCCACCCGGTAACAATCGGATCCCCGGGTTAATTAA	ACAAATGTGCACAAGCTAACAAACAGGCCTGATTACATATACACACCTTAGAATTCGAGCTCGTTTAAAC	0		0		0
YCR067C	SED4	3	235799	238999	-	CTTCCTTTTTTTTCTCTCCTTTTAAACTTAGAAAAACTAGCATAATAATG	ATAATGCAGTAGCAGGAACCGTAAACTACGCTGGCCTTCATGACGAATTG	CAAAGCTATGTAATCATATTTAACATTAATATATATTATTTCGTTATTCA	CTTCCTTTTTTTTCTCTCCTTTTAAACTTAGAAAAACTAGCATAATAATGCGGATCCCCGGGTTAATTAA	ATAATGCAGTAGCAGGAACCGTAAACTACGCTGGCCTTCATGACGAATTGCGGATCCCCGGGTTAATTAA	CAAAGCTATGTAATCATATTTAACATTAATATATATTATTTCGTTATTCAGAATTCGAGCTCGTTTAAAC	0		0		0
YCR068W	ATG15,CVT17,AUT5	3	239889	241451	+	TGATCTAGGCATTACAATTAAAGGAAACAAGGGAAATATTCTATTGAATG	CTACCTGTGTAGGCCGCAATTGGCTTGGCTTCTGCACCAAATACGAGTTG	CGCATAGGCCCTAAAACAACACTAGGGTCATAATAGATGTATGGGTCTTA	TGATCTAGGCATTACAATTAAAGGAAACAAGGGAAATATTCTATTGAATGCGGATCCCCGGGTTAATTAA	CTACCTGTGTAGGCCGCAATTGGCTTGGCTTCTGCACCAAATACGAGTTGCGGATCCCCGGGTTAATTAA	CGCATAGGCCCTAAAACAACACTAGGGTCATAATAGATGTATGGGTCTTAGAATTCGAGCTCGTTTAAAC	0		0		0
YCR069W	CPR4,SCC3,YCR070W,CYP4	3	241730	242686	+	GAAGACCGAAGAAAATAGATAGACTTTCCAATAAGTTCAGCAACAACATG	CCTACAAGGGCATGCACGAAAAGCCTCATACGGTTTCATTAAGACACAAG	ATTAAAATCATAGCCATGTGGTCATCAAGCCATCGAAAAGAAGTTGCTTA	GAAGACCGAAGAAAATAGATAGACTTTCCAATAAGTTCAGCAACAACATGCGGATCCCCGGGTTAATTAA	CCTACAAGGGCATGCACGAAAAGCCTCATACGGTTTCATTAAGACACAAGCGGATCCCCGGGTTAATTAA	ATTAAAATCATAGCCATGTGGTCATCAAGCCATCGAAAAGAAGTTGCTTAGAATTCGAGCTCGTTTAAAC	0		0		0
YCR071C	IMG2	3	242778	243218	-	CCGTTTACCTAAAGCAACTTACTCCAAGGTAGCGTGTGAGCAAAACTATG	TCAAGGGCAATGCAGTAGAGGCTGTCAAAAGGGTATTAACCAAGAAATTT	AATTAATATATATACATGAAAATTATTTTTTTATACATTAGCGATACCTA	CCGTTTACCTAAAGCAACTTACTCCAAGGTAGCGTGTGAGCAAAACTATGCGGATCCCCGGGTTAATTAA	TCAAGGGCAATGCAGTAGAGGCTGTCAAAAGGGTATTAACCAAGAAATTTCGGATCCCCGGGTTAATTAA	AATTAATATATATACATGAAAATTATTTTTTTATACATTAGCGATACCTAGAATTCGAGCTCGTTTAAAC	0		0		0
YCR072C	RSA4	3	243480	245027	-	TTTTTATATTTGTAACCTCGATAAACACACACTAACACAATATACAGATG	AAAGAGTGTGTAGTGGTGGGAAAGACAAGATGGTAAGATTGTGGACGCAT	ATATAATATTTATATGTGCATGTATGTTACTTGTCTTTGCACATAACTCA	TTTTTATATTTGTAACCTCGATAAACACACACTAACACAATATACAGATGCGGATCCCCGGGTTAATTAA	AAAGAGTGTGTAGTGGTGGGAAAGACAAGATGGTAAGATTGTGGACGCATCGGATCCCCGGGTTAATTAA	ATATAATATTTATATGTGCATGTATGTTACTTGTCTTTGCACATAACTCAGAATTCGAGCTCGTTTAAAC	0		0		0
YCR073C	SSK22	3	245261	249256	-	TTGTTTTACTTAGGGTGGCTATAAAAGGTAGTTCCTTGTAGGTGAAAATA	AAATAGCATTTGGCAACTCAGAGAAAGATCAAGTACCTATCCTAAGCTCA	ATTACATTATATATCGTAGTATATCATATTTTTAGACGTTGACCACTCTA	TTGTTTTACTTAGGGTGGCTATAAAAGGTAGTTCCTTGTAGGTGAAAATGCGGATCCCCGGGTTAATTAA	AAATAGCATTTGGCAACTCAGAGAAAGATCAAGTACCTATCCTAAGCTCACGGATCCCCGGGTTAATTAA	ATTACATTATATATCGTAGTATATCATATTTTTAGACGTTGACCACTCTAGAATTCGAGCTCGTTTAAAC	0		0		0
YCR073W-A	SOL2,YCRX13W	3	249636	250583	+	CAGTGTAGGTATGGACTAGAACAGAAAGCAATTTGCAGCAAGACAATATG	ACGTCCTCGTCACCAAAAAAAAGTATAAATTCCACCAAGGTTTGTCTATT	ATGTATGTATGTATGTGTGTATGTATGTATGTACACACATGCATGGTTTA	CAGTGTAGGTATGGACTAGAACAGAAAGCAATTTGCAGCAAGACAATATGCGGATCCCCGGGTTAATTAA	ACGTCCTCGTCACCAAAAAAAAGTATAAATTCCACCAAGGTTTGTCTATTCGGATCCCCGGGTTAATTAA	ATGTATGTATGTATGTGTGTATGTATGTATGTACACACATGCATGGTTTAGAATTCGAGCTCGTTTAAAC	0		0		0
YCR075C	ERS1	3	250698	251480	-	AAGGGAAAAAAAAAACTAAAAGCAAACAAAAGCAAACGCGAAGCAAAATG	GGTTTGTATATCGATCTCGAGGCCATGACCTGGCGTCAGAGTACCCGCTG	ATGTATATATATATATATGCGTAATTATGCAGATTTCTCCTTGTGTGCTA	AAGGGAAAAAAAAAACTAAAAGCAAACAAAAGCAAACGCGAAGCAAAATGCGGATCCCCGGGTTAATTAA	GGTTTGTATATCGATCTCGAGGCCATGACCTGGCGTCAGAGTACCCGCTGCGGATCCCCGGGTTAATTAA	ATGTATATATATATATATGCGTAATTATGCAGATTTCTCCTTGTGTGCTAGAATTCGAGCTCGTTTAAAC	0		0		0
YCR075W-A	YCR075W-A	3	251642	251869	+	AGGGCAATACCACAACCTCAAACCAAATCACCTAAACCAAATCAAAGATG	ACCTGTACAAACGCAATGATATCACTTTAGCTGTATATACCAGCGCTCAA	TTTAGATAGTATACAGACATAGCTATGTCGAAAGGGAAGGAAAGAATTTA	AGGGCAATACCACAACCTCAAACCAAATCACCTAAACCAAATCAAAGATGCGGATCCCCGGGTTAATTAA	ACCTGTACAAACGCAATGATATCACTTTAGCTGTATATACCAGCGCTCAACGGATCCCCGGGTTAATTAA	TTTAGATAGTATACAGACATAGCTATGTCGAAAGGGAAGGAAAGAATTTAGAATTCGAGCTCGTTTAAAC	0		0		0
YCR076C	YCR076C	3	251959	252687	-	CCGTATTAGCATCAATAATACCACCATAGTAACGCAAGAGTTAAACAATG	CATTTGGTCCTGGATCTGGCGGATTTGGAGGGTCAGGATCTGGCTTTATT	CTAAAAACTAAATATCACAATAAACAAGTACTAAAATAACTACCAATTTA	CCGTATTAGCATCAATAATACCACCATAGTAACGCAAGAGTTAAACAATGCGGATCCCCGGGTTAATTAA	CATTTGGTCCTGGATCTGGCGGATTTGGAGGGTCAGGATCTGGCTTTATTCGGATCCCCGGGTTAATTAA	CTAAAAACTAAATATCACAATAAACAAGTACTAAAATAACTACCAATTTAGAATTCGAGCTCGTTTAAAC	0		0		0
YCR077C	PAT1,MRT1	3	252880	255270	-	GAAGCAAAGGTTTTAACCGGAAGTAAGAGCAGCAAGAAGCACCAGCAATG	TAAACGTTATGGGGTTGGTGTATCGCGATGGTGAAATTTCAGAACTAAAG	AGAAAAAAAAATACATGCGTAAGTACATTAAAATTACAGGAAAAATCTTA	GAAGCAAAGGTTTTAACCGGAAGTAAGAGCAGCAAGAAGCACCAGCAATGCGGATCCCCGGGTTAATTAA	TAAACGTTATGGGGTTGGTGTATCGCGATGGTGAAATTTCAGAACTAAAGCGGATCCCCGGGTTAATTAA	AGAAAAAAAAATACATGCGTAAGTACATTAAAATTACAGGAAAAATCTTAGAATTCGAGCTCGTTTAAAC	0		0		0
YCR079W	PTC6,AUP1	3	255487	256815	+	TAATAGGCTGCAATCGGGGCAATTAAGCATCAGAAGAGGGGAATTTGATG	AAAGAGAAACCAAACTAATGAATGCACAATCTAACGAAACAAAATTAAAC	AATACAAAAGATGATTATCTAGGACTTGTTTCCACCCAGGAGGGTGTTTA	TAATAGGCTGCAATCGGGGCAATTAAGCATCAGAAGAGGGGAATTTGATGCGGATCCCCGGGTTAATTAA	AAAGAGAAACCAAACTAATGAATGCACAATCTAACGAAACAAAATTAAACCGGATCCCCGGGTTAATTAA	AATACAAAAGATGATTATCTAGGACTTGTTTCCACCCAGGAGGGTGTTTAGAATTCGAGCTCGTTTAAAC	0		0		0
YCR081W	SRB8,MED12,YCR080W,SSN5,NUT6,GIG1	3	257013	261296	+	TAATCGAAAGATTAAAAAAAGGTCTATAGAGGTAAGCCAATAACGCAATG	GTGTAAACCTGAGTCTTTTTGATGCTCGGTTTGAGAGGAAAAATCCACAT	CTGTTATTGGTAAATTTATAATTTATCCATTTGGATATATTCTGAGATCA	TAATCGAAAGATTAAAAAAAGGTCTATAGAGGTAAGCCAATAACGCAATGCGGATCCCCGGGTTAATTAA	GTGTAAACCTGAGTCTTTTTGATGCTCGGTTTGAGAGGAAAAATCCACATCGGATCCCCGGGTTAATTAA	CTGTTATTGGTAAATTTATAATTTATCCATTTGGATATATTCTGAGATCAGAATTCGAGCTCGTTTAAAC	1	YCR081C-A	1	YCR081C-A	0
YCR081C-A	YCR081C-A	3	261057	261293	-	TTATTGGTAAATTTATAATTTATCCATTTGGATATATTCTGAGATCAATG	ATGAGCCATTTCTGTTCGTTTTCGTGCGCTATTTCAACTATGCCGATTCC	ACGGGGAAGAAGAAGATGCAGACCAAGAAGAATCGTTTAGTTTAAATTTA	TTATTGGTAAATTTATAATTTATCCATTTGGATATATTCTGAGATCAATGCGGATCCCCGGGTTAATTAA	ATGAGCCATTTCTGTTCGTTTTCGTGCGCTATTTCAACTATGCCGATTCCCGGATCCCCGGGTTAATTAA	ACGGGGAAGAAGAAGATGCAGACCAAGAAGAATCGTTTAGTTTAAATTTAGAATTCGAGCTCGTTTAAAC	1	YCR081W	1	YCR081W	0
YCR082W	AHC2	3	261524	261910	+	CCGCTTACAAGGTCAGTACTAGCGTGTACCAGTCTATTTAAACTGGAATG	ATATAGCAGAGAACGATCAATTGTTGGCTTTGTATGAAGATGGCTTATTA	ATATATATATAAATATATGTTTAAAAATGTCCATAGCCGCTATTTGATCA	CCGCTTACAAGGTCAGTACTAGCGTGTACCAGTCTATTTAAACTGGAATGCGGATCCCCGGGTTAATTAA	ATATAGCAGAGAACGATCAATTGTTGGCTTTGTATGAAGATGGCTTATTACGGATCCCCGGGTTAATTAA	ATATATATATAAATATATGTTTAAAAATGTCCATAGCCGCTATTTGATCAGAATTCGAGCTCGTTTAAAC	0		0		0
YCR083W	TRX3	3	262218	262601	+	ACCAAAGAAAGCAGGATTGGTTAGTACATAGAGAAACCAAAGCTGTTATG	AGATCATTGGAGCTAACCCTACTGCTTTAGAGAAGGGAATCAAAGATCTA	TTTAAAACTAAAAAAAAAAAAACTACATGTGCTTATGAATATAAAATTTA	ACCAAAGAAAGCAGGATTGGTTAGTACATAGAGAAACCAAAGCTGTTATGCGGATCCCCGGGTTAATTAA	AGATCATTGGAGCTAACCCTACTGCTTTAGAGAAGGGAATCAAAGATCTACGGATCCCCGGGTTAATTAA	TTTAAAACTAAAAAAAAAAAAACTACATGTGCTTATGAATATAAAATTTAGAATTCGAGCTCGTTTAAAC	0		0		0
YCR084C	TUP1,UMR7,SFL2,ROX4,FLK1,CYC9,CRT4,AMM1,AER2,AAR1	3	262949	265090	-	TTTGATAAGCAGGGGAAGAAAGAAATCAGCTTTCCATCCAAACCAATATG	GCGGTGATTGTAAAGCAAGGATTTGGAAGTATAAAAAAATAGCGCCAAAT	TAGTTTAGTTAGTTACATTTGTAAAGTGTTCCTTTTGTGTTCTGTTCTTA	TTTGATAAGCAGGGGAAGAAAGAAATCAGCTTTCCATCCAAACCAATATGCGGATCCCCGGGTTAATTAA	GCGGTGATTGTAAAGCAAGGATTTGGAAGTATAAAAAAATAGCGCCAAATCGGATCCCCGGGTTAATTAA	TAGTTTAGTTAGTTACATTTGTAAAGTGTTCCTTTTGTGTTCTGTTCTTAGAATTCGAGCTCGTTTAAAC	0		0		0
YCR085W	YCR085W	3	265554	265907	+	CCAAAAAGAAGGGTAAATTAGGGCTTTCCTGGTTTATTTATTTGTTTATG	ATTTTATTTTGTTTATGCTTCAATATCTTGTATTTGTTTACATTGAAAAA	TCTGTCTGCTTCTTCACTGTTTTGATTTCAATGTAACCTTTTTCCAATCA	CCAAAAAGAAGGGTAAATTAGGGCTTTCCTGGTTTATTTATTTGTTTATGCGGATCCCCGGGTTAATTAA	ATTTTATTTTGTTTATGCTTCAATATCTTGTATTTGTTTACATTGAAAAACGGATCCCCGGGTTAATTAA	TCTGTCTGCTTCTTCACTGTTTTGATTTCAATGTAACCTTTTTCCAATCAGAATTCGAGCTCGTTTAAAC	0		0		0
YCR086W	CSM1	3	266032	266604	+	CAATAAAAAAAAAAGAAAGCGAAACAAGACAATCCAACGTGCGCAAAATG	AAATCGCTAAAAGCCTGAATAAGAAAAGAGAGAAAAAAGATGAAACCGAG	GAATAATCGGAATTTTATGTGTAGATATATAGACATTATGTAGCAGCTTA	CAATAAAAAAAAAAGAAAGCGAAACAAGACAATCCAACGTGCGCAAAATGCGGATCCCCGGGTTAATTAA	AAATCGCTAAAAGCCTGAATAAGAAAAGAGAGAAAAAAGATGAAACCGAGCGGATCCCCGGGTTAATTAA	GAATAATCGGAATTTTATGTGTAGATATATAGACATTATGTAGCAGCTTAGAATTCGAGCTCGTTTAAAC	0		0		0
YCR087W	YCR087W	3	266616	267116	+	AATAAGAAAAGAGAGAAAAAAGATGAAACCGAGTAAGCTGCTACATAATG	TTGCACACCTCACAGTTGAACGTAACCATCCTGTAATAACAAATATTTCT	GCGATGAGCTCTAAGAGTATTCTGTATACAACAGCAAACGGTCTCAGTCA	AATAAGAAAAGAGAGAAAAAAGATGAAACCGAGTAAGCTGCTACATAATGCGGATCCCCGGGTTAATTAA	TTGCACACCTCACAGTTGAACGTAACCATCCTGTAATAACAAATATTTCTCGGATCCCCGGGTTAATTAA	GCGATGAGCTCTAAGAGTATTCTGTATACAACAGCAAACGGTCTCAGTCAGAATTCGAGCTCGTTTAAAC	1	YCR087C-A	1	YCR087C-A	0
YCR087C-A	LUG1	3	266646	267092	-	TATACAACAGCAAACGGTCTCAGTCAAGAAATATTTGTTATTACAGGATG	TGAAAAGTCTGGTTGTGGATTCTGAGGGGCAAATCAGGTATGCAAAGGAA	GAGTAAGCTGCTACATAATGTCTATATATCTACACATAAAATTCCGATTA	TATACAACAGCAAACGGTCTCAGTCAAGAAATATTTGTTATTACAGGATGCGGATCCCCGGGTTAATTAA	TGAAAAGTCTGGTTGTGGATTCTGAGGGGCAAATCAGGTATGCAAAGGAACGGATCCCCGGGTTAATTAA	GAGTAAGCTGCTACATAATGTCTATATATCTACACATAAAATTCCGATTAGAATTCGAGCTCGTTTAAAC	1	YCR087W	1	YCR087W	0
YCR088W	ABP1	3	267693	269471	+	CAATCGCATAACCGCACGTATATATACGCACACACCTACCAATCACAATG	AAGACGGCTCAAAAGGTCTCTTCCCCAGCAATTATGTGTCTTTGGGCAAC	TTTTTTTACGTAAGAATAATATAATAGCATGACGCTGACGTGTGATTCTA	CAATCGCATAACCGCACGTATATATACGCACACACCTACCAATCACAATGCGGATCCCCGGGTTAATTAA	AAGACGGCTCAAAAGGTCTCTTCCCCAGCAATTATGTGTCTTTGGGCAACCGGATCCCCGGGTTAATTAA	TTTTTTTACGTAAGAATAATATAATAGCATGACGCTGACGTGTGATTCTAGAATTCGAGCTCGTTTAAAC	0		0		0
YCR089W	FIG2	3	270059	274888	+	AAAAGCACACTACAAAAATACGCTATCATCTACCGAATATAACTGCAATG	TTCTCTGTAGTAAGTTCTTTATGATAATGGTAATGGTGATCAACTTCATT	AGTGTCTGTTTATAGCATATATACGTACATATAATATATACGGGAAATTA	AAAAGCACACTACAAAAATACGCTATCATCTACCGAATATAACTGCAATGCGGATCCCCGGGTTAATTAA	TTCTCTGTAGTAAGTTCTTTATGATAATGGTAATGGTGATCAACTTCATTCGGATCCCCGGGTTAATTAA	AGTGTCTGTTTATAGCATATATACGTACATATAATATATACGGGAAATTAGAATTCGAGCTCGTTTAAAC	0		0		0
YCR090C	YCR090C	3	274940	275488	-	GAATAAAGACAACTTAACCAATAAAGAAAACCAGGTTGTGTACGATAATG	GGGAAGAAGTAACAATGACTGATTTCTCATCAAGCATTATTAAAGGTAAG	CCGTATATATTATATGTACGTATATATGCTATAAACAGACACTCTTTTTA	GAATAAAGACAACTTAACCAATAAAGAAAACCAGGTTGTGTACGATAATGCGGATCCCCGGGTTAATTAA	GGGAAGAAGTAACAATGACTGATTTCTCATCAAGCATTATTAAAGGTAAGCGGATCCCCGGGTTAATTAA	CCGTATATATTATATGTACGTATATATGCTATAAACAGACACTCTTTTTAGAATTCGAGCTCGTTTAAAC	0		0		0
YCR091W	KIN82	3	277029	279191	+	AGTGCCCTAAGGATTACTGCAAACAAGGTTCAACAGTGTTGGTACACATG	GGCATAACAGCTCACATAGAAGTTTCTTTAAAGACATCATACCTGAACTA	GAAACAATACAGAAATTTGGCCATGGGTTTATCTTTCTGTAAACATGTTA	AGTGCCCTAAGGATTACTGCAAACAAGGTTCAACAGTGTTGGTACACATGCGGATCCCCGGGTTAATTAA	GGCATAACAGCTCACATAGAAGTTTCTTTAAAGACATCATACCTGAACTACGGATCCCCGGGTTAATTAA	GAAACAATACAGAAATTTGGCCATGGGTTTATCTTTCTGTAAACATGTTAGAATTCGAGCTCGTTTAAAC	0		0		0
YCR092C	MSH3	3	279389	282445	-	CCAAAAGCAGTGCAAATAGATTTATTTTGTTGAATCTATTAACAATAATG	ATATAACAGCAACGGATAAACTCGCGAAATTACTATCATTGGATATCCAC	ATTTATTGTCTGATAATGCTGCATTTAGAACATACGTACCATCCGCATCA	CCAAAAGCAGTGCAAATAGATTTATTTTGTTGAATCTATTAACAATAATGCGGATCCCCGGGTTAATTAA	ATATAACAGCAACGGATAAACTCGCGAAATTACTATCATTGGATATCCACCGGATCCCCGGGTTAATTAA	ATTTATTGTCTGATAATGCTGCATTTAGAACATACGTACCATCCGCATCAGAATTCGAGCTCGTTTAAAC	0		0		0
YCR093W	CDC39,SMD6,ROS1,NOT1	3	282742	289068	+	GTAAAAGATAAGCAATTGAGAAACGTCACTCAGGGACAATTGATTACATG	ACCAATCCGCCACCATCAATAGAAGGCAAACCCCTCTACAATCCAACGCG	TTTTTTTCTGAAATCATGATTTTCGTATATAAATAAATGCAGTTTTTTTA	GTAAAAGATAAGCAATTGAGAAACGTCACTCAGGGACAATTGATTACATGCGGATCCCCGGGTTAATTAA	ACCAATCCGCCACCATCAATAGAAGGCAAACCCCTCTACAATCCAACGCGCGGATCCCCGGGTTAATTAA	TTTTTTTCTGAAATCATGATTTTCGTATATAAATAAATGCAGTTTTTTTAGAATTCGAGCTCGTTTAAAC	0		0		0
YCR094W	CDC50	3	289387	290562	+	AGAATAATTGAGTAATCGAACTTGAAGTTCTATAGAACAGCTTGTATATG	AGGATTATGAGGATGTACACGCAGAGAATACAACATTGAGGGAAATTTTA	CTTATAAACACAAATACCTACAGGCACTAAAGTTTGTTTTTTGGCCTCTA	AGAATAATTGAGTAATCGAACTTGAAGTTCTATAGAACAGCTTGTATATGCGGATCCCCGGGTTAATTAA	AGGATTATGAGGATGTACACGCAGAGAATACAACATTGAGGGAAATTTTACGGATCCCCGGGTTAATTAA	CTTATAAACACAAATACCTACAGGCACTAAAGTTTGTTTTTTGGCCTCTAGAATTCGAGCTCGTTTAAAC	0		0		0
YCR095C	OCA4	3	290795	291883	-	AAGAGAGACACTTACAGCACTGGTGCGATCCATAACCTGAATTCATAATG	AAGAAAACGTTCCGGAAGAGCATCACTTTTATAGGGAACATATTTTTACA	AAAACGTTTATCATGAAATCATCTATACATATACGTAAAAATGTAAACTA	AAGAGAGACACTTACAGCACTGGTGCGATCCATAACCTGAATTCATAATGCGGATCCCCGGGTTAATTAA	AAGAAAACGTTCCGGAAGAGCATCACTTTTATAGGGAACATATTTTTACACGGATCCCCGGGTTAATTAA	AAAACGTTTATCATGAAATCATCTATACATATACGTAAAAATGTAAACTAGAATTCGAGCTCGTTTAAAC	0		0		0
YCR095W-A	YCR095W-A	3	292264	292422	+	AAAACTTTTAAAATATGATATTCAAAGCTTGAGCATTGGGCTTCTGGATG	TAAATAAAAAAAGTTCAATGCATGCCTTCCTATGCAAGATTTATAAAAGG	CACCGTCTTTAACTGCCTTTATTGAGATGTGGCTGCTCCTGACCTGTTCA	AAAACTTTTAAAATATGATATTCAAAGCTTGAGCATTGGGCTTCTGGATGCGGATCCCCGGGTTAATTAA	TAAATAAAAAAAGTTCAATGCATGCCTTCCTATGCAAGATTTATAAAAGGCGGATCCCCGGGTTAATTAA	CACCGTCTTTAACTGCCTTTATTGAGATGTGGCTGCTCCTGACCTGTTCAGAATTCGAGCTCGTTTAAAC	0		0		0
YCR096C	HMRA2,A2	3	295804	296162	-	AAACAACATCTCAACTCACTACTACCATTACTGTATTACTCAAAGAAATG	CAGAATTAGCGGACCTCTTGAGCGGTGAGCCTCTGGCAAAGAAGAAAGAA	TATATATATATATTCTACACAGATATATACATATTTGTTTTTCGGGCTCA	AAACAACATCTCAACTCACTACTACCATTACTGTATTACTCAAAGAAATGCGGATCCCCGGGTTAATTAA	CAGAATTAGCGGACCTCTTGAGCGGTGAGCCTCTGGCAAAGAAGAAAGAACGGATCCCCGGGTTAATTAA	TATATATATATATTCTACACAGATATATACATATTTGTTTTTCGGGCTCAGAATTCGAGCTCGTTTAAAC	0		0		0
YCR097W	HMRA1,YCR097WB	3	296459	296945	+	GTAAAACAATACATCTCCTTATATCAAAGAAAATCAAGAAGGACAACATG	TATCCTATACTAACAATTTGTAGTTCATAAATAAACGTATGAGATCTAAA	ACTAAAAGAAAAACCCGACTATGCTATTTTAATCATTGAAAACGAATTTA	GTAAAACAATACATCTCCTTATATCAAAGAAAATCAAGAAGGACAACATGCGGATCCCCGGGTTAATTAA	TATCCTATACTAACAATTTGTAGTTCATAAATAAACGTATGAGATCTAAACGGATCCCCGGGTTAATTAA	ACTAAAAGAAAAACCCGACTATGCTATTTTAATCATTGAAAACGAATTTAGAATTCGAGCTCGTTTAAAC	0		0		0
YCR097W-A	YCR097W-A	3	297063	297329	+	TTTTATAAACCCTGGTTTTGGTTTTGTAGAGTGGTTGACGAATAATTATG	ATGTAGTGACATTTTCTCTTAATCTTATACTAATTTCTATGACATTTATA	ATATTTCTCTCAAAGTTTGCAAAATTATGTTGATCATAAGTCTCTTCTTA	TTTTATAAACCCTGGTTTTGGTTTTGTAGAGTGGTTGACGAATAATTATGCGGATCCCCGGGTTAATTAA	ATGTAGTGACATTTTCTCTTAATCTTATACTAATTTCTATGACATTTATACGGATCCCCGGGTTAATTAA	ATATTTCTCTCAAAGTTTGCAAAATTATGTTGATCATAAGTCTCTTCTTAGAATTCGAGCTCGTTTAAAC	0		0		0
YCR098C	GIT1	3	301135	302691	-	GAGTTGATCTTTTTGCTTATAATCAAAAAAATAGAATAGGATAAAAAATG	GTAGTAAGAAAAACGCAGAAATAATTTCAGTCAGACAGGTCGATCAAAGT	AAAGAAATTTTGAGGTTAAAGGATGGAGGAAGAAATCGATACCAATTTCA	GAGTTGATCTTTTTGCTTATAATCAAAAAAATAGAATAGGATAAAAAATGCGGATCCCCGGGTTAATTAA	GTAGTAAGAAAAACGCAGAAATAATTTCAGTCAGACAGGTCGATCAAAGTCGGATCCCCGGGTTAATTAA	AAAGAAATTTTGAGGTTAAAGGATGGAGGAAGAAATCGATACCAATTTCAGAATTCGAGCTCGTTTAAAC	0		0		0
YCR099C	YCR099C	3	304918	305385	-	AGAAGGAAACAACACCAACATCTCATATATTGCAAGAAGTGTCCTGTATG	CGAATGGTAAGAAAATAGCAACCATTGAAAACAAGTTTGACTTTGAAATT	AGCATGATAAAAGATTCACGCAAAACTGTATCGAAATATTGATAAAATTA	AGAAGGAAACAACACCAACATCTCATATATTGCAAGAAGTGTCCTGTATGCGGATCCCCGGGTTAATTAA	CGAATGGTAAGAAAATAGCAACCATTGAAAACAAGTTTGACTTTGAAATTCGGATCCCCGGGTTAATTAA	AGCATGATAAAAGATTCACGCAAAACTGTATCGAAATATTGATAAAATTAGAATTCGAGCTCGTTTAAAC	1	YCR100C	1	YCR100C	0
YCR100C	YCR100C	3	305357	306307	-	TGAAGTCATATGTGGTCGTTTTAACGCAAGATGACGGGCATAACGAGATG	CATATATTGCAAGAAGTGTCCTGTATGCGATCGATTTTTCTGCTGCATTT	CTGCCAAATTCCAGTCTTCGAAATCTTCCTCTTCACACGTTTTATAGTCA	TGAAGTCATATGTGGTCGTTTTAACGCAAGATGACGGGCATAACGAGATGCGGATCCCCGGGTTAATTAA	CATATATTGCAAGAAGTGTCCTGTATGCGATCGATTTTTCTGCTGCATTTCGGATCCCCGGGTTAATTAA	CTGCCAAATTCCAGTCTTCGAAATCTTCCTCTTCACACGTTTTATAGTCAGAATTCGAGCTCGTTTAAAC	1	YCR099C	1	YCR099C	0
YCR101C	YCR101C	3	306568	307116	-	CTTTGAAAAAAAACTTTGAACTAAGAAAAGGTAAGAGATCCTCAATTATG	ATCCTTTTTTAAAATTAAACCTTCCTTGGAAAAGAAAAAAGACGACGATA	AAAGTCAGAATCCTTGCTAGACTTAATGAAATGACAGCTTTAAGTTGTTA	CTTTGAAAAAAAACTTTGAACTAAGAAAAGGTAAGAGATCCTCAATTATGCGGATCCCCGGGTTAATTAA	ATCCTTTTTTAAAATTAAACCTTCCTTGGAAAAGAAAAAAGACGACGATACGGATCCCCGGGTTAATTAA	AAAGTCAGAATCCTTGCTAGACTTAATGAAATGACAGCTTTAAGTTGTTAGAATTCGAGCTCGTTTAAAC	0		0		0
YCR102C	YCR102C	3	308446	309553	-	ACAATTACATATAACCTACAAACAGGCAAGTTGCAATTCCAGAAACCATG	CATTAAACATCGGTAAGAACTCTGGTGAAAAACTAGTTGCCGTATTAAAC	TACGTAATAACTGTGTATACAAAAGAAAAATAATATCTGTTCGTCATCTA	ACAATTACATATAACCTACAAACAGGCAAGTTGCAATTCCAGAAACCATGCGGATCCCCGGGTTAATTAA	CATTAAACATCGGTAAGAACTCTGGTGAAAAACTAGTTGCCGTATTAAACCGGATCCCCGGGTTAATTAA	TACGTAATAACTGTGTATACAAAAGAAAAATAATATCTGTTCGTCATCTAGAATTCGAGCTCGTTTAAAC	0		0		0
YCR102W-A	YCR102W-A	3	310821	311018	+	ATCAACTATTATGAATTCTCTAGAAAGTGGTTGCAAAGGAAATGAATAGG	GGAAATACATCCAAGAAGCACAGTTGAGCTCTAACTATGAGCCGTTACAA	AGTTGGTACTCCATGTAGCTTCTAAGTCAAAAGAAATGTCTCTATCTTTA	ATCAACTATTATGAATTCTCTAGAAAGTGGTTGCAAAGGAAATGAATATGCGGATCCCCGGGTTAATTAA	GGAAATACATCCAAGAAGCACAGTTGAGCTCTAACTATGAGCCGTTACAACGGATCCCCGGGTTAATTAA	AGTTGGTACTCCATGTAGCTTCTAAGTCAAAAGAAATGTCTCTATCTTTAGAATTCGAGCTCGTTTAAAC	0		0		0
YCR104W	PAU3	3	311887	312261	+	TATTTCTTGTTAAGATTACATCAGCACTAACAAACAAAACAAATACAATG	CTATCTCCAGTGCTCTATCTAAGGACGGTATCTACACTGCTATTCCAAAA	NNNNNNNNNNNNNNNNNNNNNNNNNNNNNNNNNNNNNNNNNNNNNNNCTA	TATTTCTTGTTAAGATTACATCAGCACTAACAAACAAAACAAATACAATGCGGATCCCCGGGTTAATTAA	CTATCTCCAGTGCTCTATCTAAGGACGGTATCTACACTGCTATTCCAAAACGGATCCCCGGGTTAATTAA	NNNNNNNNNNNNNNNNNNNNNNNNNNNNNNNNNNNNNNNNNNNNNNNCTAGAATTCGAGCTCGTTTAAAC	0		0		0
YCR105W	ADH7,ADHVII	3	313166	314252	+	NNNNNNNNNNNNNNNNNNNNNNNNNNNNNNNNNNNNNNNNNNNNNNNNNN	NNNNNNNNNNNNNNNNNNNNNNNNNNNNNNNNNNNNNNNNNNNNNNNNNN	NNNNNNNNNNNNNNNNNNNNNNNNNNNNNNNNNNNNNNNNNNNNNNNNNN	NNNNNNNNNNNNNNNNNNNNNNNNNNNNNNNNNNNNNNNNNNNNNNNATGCGGATCCCCGGGTTAATTAA	NNNNNNNNNNNNNNNNNNNNNNNNNNNNNNNNNNNNNNNNNNNNNNNNNNCGGATCCCCGGGTTAATTAA	NNNNNNNNNNNNNNNNNNNNNNNNNNNNNNNNNNNNNNNNNNNNNNNNNNGAATTCGAGCTCGTTTAAAC	0		0		0
YCR106W	RDS1	3	315057	317555	+	NNNNNNNNNNNNNNNNNNNNNNNNNNNNNNNNNNNNNNNNNNNNNNNNNN	NNNNNNNNNNNNNNNNNNNNNNNNNNNNNNNNNNNNNNNNNNNNNNNNNN	TTTTTGGCTTGTTTTTTTTTTTTTAGCNNNNNNNNNNNNNNNNNNNNNNN	NNNNNNNNNNNNNNNNNNNNNNNNNNNNNNNNNNNNNNNNNNNNNNNATGCGGATCCCCGGGTTAATTAA	NNNNNNNNNNNNNNNNNNNNNNNNNNNNNNNNNNNNNNNNNNNNNNNNNNCGGATCCCCGGGTTAATTAA	TTTTTGGCTTGTTTTTTTTTTTTTAGCNNNNNNNNNNNNNNNNNNNNNNNGAATTCGAGCTCGTTTAAAC	0		0		0
YCR107W	AAD3	3	317995	319086	+	NNNNNNNNNNNNNNNNNNNNNNNNNNNNNNNNNNNNNNNNNNNNNNNNNN	NNNNNNNNNNNNNNNNNNNNNNNNNNNNNNNNNNNNNNNNNNNNNNNNNN	NNNNNNNNNNNNNNNNNNNNNNNNNNNNNNNNNNNNNNNNNNNNNNNNNN	NNNNNNNNNNNNNNNNNNNNNNNNNNNNNNNNNNNNNNNNNNNNNNNATGCGGATCCCCGGGTTAATTAA	NNNNNNNNNNNNNNNNNNNNNNNNNNNNNNNNNNNNNNNNNNNNNNNNNNCGGATCCCCGGGTTAATTAA	NNNNNNNNNNNNNNNNNNNNNNNNNNNNNNNNNNNNNNNNNNNNNNNNNNGAATTCGAGCTCGTTTAAAC	0		0		0
YCR108C	YCR108C	3	320667	320867	-	TAAATAATACATACATACTTACCCTACCACTCTATATCACCATCACTACC	ATTATGCACGGCACTTGCCTCAGCGGTCTATACCCTGTGCCATTTACCCA	NNNNNNNNNNNNNNNNNNNNNNNNNNNNNTGTGGATAATCGTGGGAGTTA	TAAATAATACATACATACTTACCCTACCACTCTATATCACCATCACTATGCGGATCCCCGGGTTAATTAA	ATTATGCACGGCACTTGCCTCAGCGGTCTATACCCTGTGCCATTTACCCACGGATCCCCGGGTTAATTAA	NNNNNNNNNNNNNNNNNNNNNNNNNNNNNTGTGGATAATCGTGGGAGTTAGAATTCGAGCTCGTTTAAAC	0		0		0
YDL248W	COS7	4	2612	3953	+	ACTATCTCGAATAAAAAACCCCTCGAACTGCCATCTCACTACCGAAAATG	TATGTTGAAAGCTTTACGAAATTCTGNNNNNNNNNNNNNNNNNNNNNNNN	NNNNNNNNNNNNNNNNNNNNNNNNNNNNNNNNNNNNNNNNNNNNNNNNNN	ACTATCTCGAATAAAAAACCCCTCGAACTGCCATCTCACTACCGAAAATGCGGATCCCCGGGTTAATTAA	TATGTTGAAAGCTTTACGAAATTCTGNNNNNNNNNNNNNNNNNNNNNNNNCGGATCCCCGGGTTAATTAA	NNNNNNNNNNNNNNNNNNNNNNNNNNNNNNNNNNNNNNNNNNNNNNNNNNGAATTCGAGCTCGTTTAAAC	0		0		0
YDL247W-A	YDL247W-A	4	4762	4836	+	TGGGACAATTCTGGTTTCATAAAAGGTTTCATTCATCCAGATTACAGATG	AAATACTGATACCTCATCAAAATGAAAATATGTTTCTAACGGAACTGTAT	TAGTTAATTTGTTAACCAACGCGACTCCAGCTAACTGAGCGCATGGTCTA	TGGGACAATTCTGGTTTCATAAAAGGTTTCATTCATCCAGATTACAGATGCGGATCCCCGGGTTAATTAA	AAATACTGATACCTCATCAAAATGAAAATATGTTTCTAACGGAACTGTATCGGATCCCCGGGTTAATTAA	TAGTTAATTTGTTAACCAACGCGACTCCAGCTAACTGAGCGCATGGTCTAGAATTCGAGCTCGTTTAAAC	0		0		0
YDL247W	MPH2	4	6985	8815	+	NNNNNNNNNNNNNNNNNNNNNNNNNNNNNNNNNNNNNNNNNNNNNNNNNN	NNNNNNNNNNNNNNNNNNNNNNNNNNNNNNNNNNNNNNNNNNNNNNNNNN	NNNNNNNNNNNNNNNNNNNNNNNNNNNNNNNNNNNNNNNNNNNNNNNNNN	NNNNNNNNNNNNNNNNNNNNNNNNNNNNNNNNNNNNNNNNNNNNNNNATGCGGATCCCCGGGTTAATTAA	NNNNNNNNNNNNNNNNNNNNNNNNNNNNNNNNNNNNNNNNNNNNNNNNNNCGGATCCCCGGGTTAATTAA	NNNNNNNNNNNNNNNNNNNNNNNNNNNNNNNNNNNNNNNNNNNNNNNNNNGAATTCGAGCTCGTTTAAAC	0		0		0
YDL246C	SOR2	4	9684	10757	-	NNNNNNNNNNNNNNNNNNNNNNNNNNNNNNNNNNNNNNNNNNNNNNNNNN	NNNNNNNNNNNNNNNNNNNNNNNNNNNNNNNNNNNNNNNNNNNNNNNNNN	NNNNNNNNNNNNNNNNNNNNNNNNNNNNNNNNNNNNNNNNNNNNNNNNNN	NNNNNNNNNNNNNNNNNNNNNNNNNNNNNNNNNNNNNNNNNNNNNNNATGCGGATCCCCGGGTTAATTAA	NNNNNNNNNNNNNNNNNNNNNNNNNNNNNNNNNNNNNNNNNNNNNNNNNNCGGATCCCCGGGTTAATTAA	NNNNNNNNNNNNNNNNNNNNNNNNNNNNNNNNNNNNNNNNNNNNNNNNNNGAATTCGAGCTCGTTTAAAC	0		0		0
YDL245C	HXT15	4	12680	14383	-	NNNNNNNNNNNNNNNNNNNNNNNNNNNNNNNNNNNNNNNNNNNNNNNNNN	NNNNNNNNNNNNNNNNNNNNNNNNNNNNNNNNNNNNNNNNNNNNNNNNNN	NNNNNNNNNNNNNNNNNNNNNNNNNNNNNNNNNNNNNNNNNNNNNNNNNN	NNNNNNNNNNNNNNNNNNNNNNNNNNNNNNNNNNNNNNNNNNNNNNNATGCGGATCCCCGGGTTAATTAA	NNNNNNNNNNNNNNNNNNNNNNNNNNNNNNNNNNNNNNNNNNNNNNNNNNCGGATCCCCGGGTTAATTAA	NNNNNNNNNNNNNNNNNNNNNNNNNNNNNNNNNNNNNNNNNNNNNNNNNNGAATTCGAGCTCGTTTAAAC	0		0		0
YDL244W	THI13	4	17227	18249	+	TCAATTATATAAAAATACCACAACAACAATACACATACTTCCAAGCTATG	AAGAAAAATGCAGACAGGAAGGTACTTTCAAGAGATTGGCTCTTCCAGCT	AAACAAGTCGTAGAGGAAGGCTACGCTCGAGGAGTGACGAAGTGCGTTTA	TCAATTATATAAAAATACCACAACAACAATACACATACTTCCAAGCTATGCGGATCCCCGGGTTAATTAA	AAGAAAAATGCAGACAGGAAGGTACTTTCAAGAGATTGGCTCTTCCAGCTCGGATCCCCGGGTTAATTAA	AAACAAGTCGTAGAGGAAGGCTACGCTCGAGGAGTGACGAAGTGCGTTTAGAATTCGAGCTCGTTTAAAC	0		0		0
YDL243C	AAD4	4	18600	19589	-	CACTAATCTTAGGAGGAGCTTCACTTGGCGATGCATGGTCAGCCTTTATG	CCAAGAAGGCTTCACTTCTCACGGCAATGTCTGCGCAGATTTCCTTCGAT	ATATAAGGACATATTTCTTACACAAACGCACCAAAAAAGAAATCTGATTA	CACTAATCTTAGGAGGAGCTTCACTTGGCGATGCATGGTCAGCCTTTATGCGGATCCCCGGGTTAATTAA	CCAAGAAGGCTTCACTTCTCACGGCAATGTCTGCGCAGATTTCCTTCGATCGGATCCCCGGGTTAATTAA	ATATAAGGACATATTTCTTACACAAACGCACCAAAAAAGAAATCTGATTAGAATTCGAGCTCGTTTAAAC	0		0		0
YDL242W	YDL242W	4	19982	20335	+	CTGCTTACTAATTTTATGTTGACGGTTGAAAGCGGATTTTAAAACGTATG	GAGACCATGAGGTTAGACAATGTGAGGATACCAACTTCGGCTTCAAAATT	TTTTAAATAAGGCCGAACCTAAATGTTGCCTTCAAAATTAACCTGTATCA	CTGCTTACTAATTTTATGTTGACGGTTGAAAGCGGATTTTAAAACGTATGCGGATCCCCGGGTTAATTAA	GAGACCATGAGGTTAGACAATGTGAGGATACCAACTTCGGCTTCAAAATTCGGATCCCCGGGTTAATTAA	TTTTAAATAAGGCCGAACCTAAATGTTGCCTTCAAAATTAACCTGTATCAGAATTCGAGCTCGTTTAAAC	0		0		0
YDL241W	YDL241W	4	21648	22019	+	ATTTTTGCATCACACCCAAGAAAAATCTATAATAGAGACACAAAAAAATG	CTCTCGCCAAATTTACCATACTGTTCATGCTAGTGTTGTATACAATTGTC	TATGGTGGCTACTGCGACCACCAATCCAAAGTGTCATACCTTGAGAATTA	ATTTTTGCATCACACCCAAGAAAAATCTATAATAGAGACACAAAAAAATGCGGATCCCCGGGTTAATTAA	CTCTCGCCAAATTTACCATACTGTTCATGCTAGTGTTGTATACAATTGTCCGGATCCCCGGGTTAATTAA	TATGGTGGCTACTGCGACCACCAATCCAAAGTGTCATACCTTGAGAATTAGAATTCGAGCTCGTTTAAAC	0		0		0
YDL240C-A	YDL240C-A	4	23484	23621	-	GCCTTGGTTGGCTCGAGAGGAATGATTTACATATTTTAAATTCTCAAATG	AAAAAGATACTTACATAAAGATAAGGATATACTCGCCAAGATCGATTTCT	TTGCAGGTTAGCCCATCGCTACAACACCTCCCCACAAAGTATTTACTTCA	GCCTTGGTTGGCTCGAGAGGAATGATTTACATATTTTAAATTCTCAAATGCGGATCCCCGGGTTAATTAA	AAAAAGATACTTACATAAAGATAAGGATATACTCGCCAAGATCGATTTCTCGGATCCCCGGGTTAATTAA	TTGCAGGTTAGCCCATCGCTACAACACCTCCCCACAAAGTATTTACTTCAGAATTCGAGCTCGTTTAAAC	0		0		0
YDL240W	LRG1	4	23836	26889	+	AAAAAAGAGCAGACAAATTATCAAACAACAAGTACCGGAGGTGAGCAATG	TCACAGTCAAAGATTCGACCACAACGGTCATACAAGGTGAAATAAACAAA	GGAGAAGAAAAAAAGGAAAATGAGGGGAAACTTACAGTTTCTGCCTATTA	AAAAAAGAGCAGACAAATTATCAAACAACAAGTACCGGAGGTGAGCAATGCGGATCCCCGGGTTAATTAA	TCACAGTCAAAGATTCGACCACAACGGTCATACAAGGTGAAATAAACAAACGGATCCCCGGGTTAATTAA	GGAGAAGAAAAAAAGGAAAATGAGGGGAAACTTACAGTTTCTGCCTATTAGAATTCGAGCTCGTTTAAAC	0		0		0
YDL239C	ADY3	4	27416	29788	-	TTTGGGATTTTGAATGGGATAGTTGAATACAACAAACTTCTCCGAATATG	AGCATCCTCTTGAGTATGATTTGCAAGCGTTGTTTAAATATTTCTTTTCT	ATTAATGACACCATTGAATATATTAGTTCTAAATAAAAAAAAAAAAGCTA	TTTGGGATTTTGAATGGGATAGTTGAATACAACAAACTTCTCCGAATATGCGGATCCCCGGGTTAATTAA	AGCATCCTCTTGAGTATGATTTGCAAGCGTTGTTTAAATATTTCTTTTCTCGGATCCCCGGGTTAATTAA	ATTAATGACACCATTGAATATATTAGTTCTAAATAAAAAAAAAAAAGCTAGAATTCGAGCTCGTTTAAAC	0		0		0
YDL238C	GUD1	4	29998	31467	-	CATTTTATTGAATGAATATATGAATTGGGCTGTCCTTTGAAGAGGATATG	ATCGCAACACCACTAAAGTTTGGGTAGCCGGCCAGCAAGTCTACCAGATT	TCATTAATACTTGGAACAAGATATAGTAGCCCTCTAAACATATACAACTA	CATTTTATTGAATGAATATATGAATTGGGCTGTCCTTTGAAGAGGATATGCGGATCCCCGGGTTAATTAA	ATCGCAACACCACTAAAGTTTGGGTAGCCGGCCAGCAAGTCTACCAGATTCGGATCCCCGGGTTAATTAA	TCATTAATACTTGGAACAAGATATAGTAGCCCTCTAAACATATACAACTAGAATTCGAGCTCGTTTAAAC	0		0		0
YDL237W	YDL237W	4	31670	32842	+	ACTCGAGATAAGACCAACAAAGATAAGTACCTCGGTTTAGTTAAGCGATG	GTTCCGATTTACTTAACCTGGACAATTTATTCATGGCATCGTCATTGATA	AATGTTTATATAAATATATGGCTTTTCTTATCCACAGCTCAAGCCACTTA	ACTCGAGATAAGACCAACAAAGATAAGTACCTCGGTTTAGTTAAGCGATGCGGATCCCCGGGTTAATTAA	GTTCCGATTTACTTAACCTGGACAATTTATTCATGGCATCGTCATTGATACGGATCCCCGGGTTAATTAA	AATGTTTATATAAATATATGGCTTTTCTTATCCACAGCTCAAGCCACTTAGAATTCGAGCTCGTTTAAAC	0		0		0
YDL236W	PHO13	4	33309	34247	+	AAAAAGCCTTATAGCTTGCCCTGACAAAGAATATACAACTCGGGAAAATG	TTTACATTGATAAACTTGGTGACATCTACGCCTTAACCAATAATGAGTTA	TTTCCTTTTCAAAAAGTAATTCTACCCCTAGATTTTGCATTGCTCCTCTA	AAAAAGCCTTATAGCTTGCCCTGACAAAGAATATACAACTCGGGAAAATGCGGATCCCCGGGTTAATTAA	TTTACATTGATAAACTTGGTGACATCTACGCCTTAACCAATAATGAGTTACGGATCCCCGGGTTAATTAA	TTTCCTTTTCAAAAAGTAATTCTACCCCTAGATTTTGCATTGCTCCTCTAGAATTCGAGCTCGTTTAAAC	0		0		0
YDL235C	YPD1	4	34426	34929	-	AAGAAATAACAACACTCGTTCTCGGAAACAAGAAAATACACACAATAATG	AGTTCAAACTGGCGAGAATTGAGTTATCTAAATATTACAACACAAACCTA	TCCGGGGAAGAATGGATTATCCGGAGGTGTGAATAAAATGATGACGATTA	AAGAAATAACAACACTCGTTCTCGGAAACAAGAAAATACACACAATAATGCGGATCCCCGGGTTAATTAA	AGTTCAAACTGGCGAGAATTGAGTTATCTAAATATTACAACACAAACCTACGGATCCCCGGGTTAATTAA	TCCGGGGAAGAATGGATTATCCGGAGGTGTGAATAAAATGATGACGATTAGAATTCGAGCTCGTTTAAAC	0		0		0
YDL234C	GYP7	4	35248	37488	-	TTGCACAAATTGGCAAAGTTCTACAAGAGTCATTCATACATCCCCTGATG	AAAAACCTATCATAAGACATGAAGGGCAAAGGAGCAAAAATTCCGTTAAA	ATTATATCTCCGGTATTCAATATGTAAAGTTCCGTTTCTATTTACCACTA	TTGCACAAATTGGCAAAGTTCTACAAGAGTCATTCATACATCCCCTGATGCGGATCCCCGGGTTAATTAA	AAAAACCTATCATAAGACATGAAGGGCAAAGGAGCAAAAATTCCGTTAAACGGATCCCCGGGTTAATTAA	ATTATATCTCCGGTATTCAATATGTAAAGTTCCGTTTCTATTTACCACTAGAATTCGAGCTCGTTTAAAC	0		0		0
YDL233W	YDL233W	4	37808	39184	+	TTGACACTGTTCATGGGGCAGAAGGAAAAGCAAAGATTATCTGCAATATG	GTGATGTGAATGATATTAACAAAGACATGACAAAAAAGATGATGAAGTTT	GCAATTCTCTTAATATTTCAATGGGTGACGTTAGGTAATTACCTTCTTTA	TTGACACTGTTCATGGGGCAGAAGGAAAAGCAAAGATTATCTGCAATATGCGGATCCCCGGGTTAATTAA	GTGATGTGAATGATATTAACAAAGACATGACAAAAAAGATGATGAAGTTTCGGATCCCCGGGTTAATTAA	GCAATTCTCTTAATATTTCAATGGGTGACGTTAGGTAATTACCTTCTTTAGAATTCGAGCTCGTTTAAAC	0		0		0
YDL232W	OST4	4	39498	39608	+	TTACACTTGCAAGTCAGTAGAGAAACCCAGTACAGAGCAAGCAAAAGATG	CTTTAATTGTCATTTACCATGCTGTTGACTCCACCATGTCTCCTAAGAAC	AGCGACGTATAATAAAAACTGAAGTTCGCTATCCAAATGTAACCACTTTA	TTACACTTGCAAGTCAGTAGAGAAACCCAGTACAGAGCAAGCAAAAGATGCGGATCCCCGGGTTAATTAA	CTTTAATTGTCATTTACCATGCTGTTGACTCCACCATGTCTCCTAAGAACCGGATCCCCGGGTTAATTAA	AGCGACGTATAATAAAAACTGAAGTTCGCTATCCAAATGTAACCACTTTAGAATTCGAGCTCGTTTAAAC	0		0		0
YDL231C	BRE4	4	39878	43255	-	CTAAGGAAAGCATATACAGTATAGTGCTGGAATTGTAACAGGTCCTCATG	TGTTCCAGGTAGAGAGTTGTGCAAAAGATATACTGGGCGAAGAAAACTTT	TCATTATTAATAAAAAGAATTCCTATACATATATTCAAAAACAAATGTTA	CTAAGGAAAGCATATACAGTATAGTGCTGGAATTGTAACAGGTCCTCATGCGGATCCCCGGGTTAATTAA	TGTTCCAGGTAGAGAGTTGTGCAAAAGATATACTGGGCGAAGAAAACTTTCGGATCCCCGGGTTAATTAA	TCATTATTAATAAAAAGAATTCCTATACATATATTCAAAAACAAATGTTAGAATTCGAGCTCGTTTAAAC	0		0		0
YDL230W	PTP1	4	43711	44718	+	GAGTTATCAAGAAAAGCGTTTGTTAGTAGTAGTTTGCGACAGTGGAGATG	TATTTATCTACCATGCTGCCAAGTATCTTAACAGTCTTTCCGTGAACCAA	GTATTGTTATTGAAAAAATGCACAATTAGGAACTTTTATATAGCTGTCTA	GAGTTATCAAGAAAAGCGTTTGTTAGTAGTAGTTTGCGACAGTGGAGATGCGGATCCCCGGGTTAATTAA	TATTTATCTACCATGCTGCCAAGTATCTTAACAGTCTTTCCGTGAACCAACGGATCCCCGGGTTAATTAA	GTATTGTTATTGAAAAAATGCACAATTAGGAACTTTTATATAGCTGTCTAGAATTCGAGCTCGTTTAAAC	0		0		0
YDL229W	SSB1,YG101	4	45076	46917	+	GGATTTTCAGATGTCCCAAGATCATTACAGTATTTTAATTGAACAAAATG	AGGCTGAAGTTGGTTTGAAGAGAGTTGTCACCAAGGCCATGTCTTCTCGT	TTATATACAATATAAGTAATATTCATATATATGTGATGAATGCAGTCTTA	GGATTTTCAGATGTCCCAAGATCATTACAGTATTTTAATTGAACAAAATGCGGATCCCCGGGTTAATTAA	AGGCTGAAGTTGGTTTGAAGAGAGTTGTCACCAAGGCCATGTCTTCTCGTCGGATCCCCGGGTTAATTAA	TTATATACAATATAAGTAATATTCATATATATGTGATGAATGCAGTCTTAGAATTCGAGCTCGTTTAAAC	1	YDL228C	1	YDL228C	0
YDL228C	YDL228C	4	46288	46929	-	AGAAAACAAAATTTATATACAATATAAGTAATATTCATATATATGTGATG	GTGTTTCTTGGAACAACGATACCGAACATGTCACCTTGCATACCAACACC	CTGACGAAACCAAGGACTTGTTGTTGTTAGATGTTGCTCCATTATCTCTA	AGAAAACAAAATTTATATACAATATAAGTAATATTCATATATATGTGATGCGGATCCCCGGGTTAATTAA	GTGTTTCTTGGAACAACGATACCGAACATGTCACCTTGCATACCAACACCCGGATCCCCGGGTTAATTAA	CTGACGAAACCAAGGACTTGTTGTTGTTAGATGTTGCTCCATTATCTCTAGAATTCGAGCTCGTTTAAAC	1	YDL229W	1	YDL229W	0
YDL227C	HO	4	47282	49042	-	AAATCCATATCCTCATAAGCAGCAATCAATTCCATCTATACTTTAAAATG	TCCGCGGGCCTCATAAGAGTTGTGGTAACAACGCAGGTGCGCGCATCTGC	AAATTTTACTTTTATTACATACAACTTTTTAAACTAATATACACATTTTA	AAATCCATATCCTCATAAGCAGCAATCAATTCCATCTATACTTTAAAATGCGGATCCCCGGGTTAATTAA	TCCGCGGGCCTCATAAGAGTTGTGGTAACAACGCAGGTGCGCGCATCTGCCGGATCCCCGGGTTAATTAA	AAATTTTACTTTTATTACATACAACTTTTTAAACTAATATACACATTTTAGAATTCGAGCTCGTTTAAAC	0		0		0
YDL226C	GCS1	4	52127	53185	-	GAGTTTAAATGGTGCCAATTGAGCAATTTTATCGCGGATTATAGAGCATG	ATAATAACGATAAGAAGAATGAACAGGACGAGGACAAATGGGACGATTTC	AATGTGAATTGAACTTTCCTTGAATGTTGAGAAAAACTATATTAAAATTA	GAGTTTAAATGGTGCCAATTGAGCAATTTTATCGCGGATTATAGAGCATGCGGATCCCCGGGTTAATTAA	ATAATAACGATAAGAAGAATGAACAGGACGAGGACAAATGGGACGATTTCCGGATCCCCGGGTTAATTAA	AATGTGAATTGAACTTTCCTTGAATGTTGAGAAAAACTATATTAAAATTAGAATTCGAGCTCGTTTAAAC	0		0		0
YDL225W	SHS1,SEP7	4	53457	55112	+	AGCCCCAAAGATCTGCTTATAATTGCTAGAAAAATATATTATTAATCATG	AAAAAAATGACACGTATACTGATTTAGCCTCTATTGCATCGGGTAGAGAT	TATTTATTTATTTATTTGCTCAGCTTTGGATTTTGTACAGATACAACTCA	AGCCCCAAAGATCTGCTTATAATTGCTAGAAAAATATATTATTAATCATGCGGATCCCCGGGTTAATTAA	AAAAAAATGACACGTATACTGATTTAGCCTCTATTGCATCGGGTAGAGATCGGATCCCCGGGTTAATTAA	TATTTATTTATTTATTTGCTCAGCTTTGGATTTTGTACAGATACAACTCAGAATTCGAGCTCGTTTAAAC	0		0		0
YDL224C	WHI4	4	55409	57358	-	TGCCACATCTACGCTGAAAAATAACGCTTAAGGTTTCTCAATTAACAATG	ACAGTAGGAGTAAATCTGGTTACAGCTTTAATGGAAGTTACGGGAAATCA	GTCAGAAAGTAAAGCAAAAGAAAATTAATAAAGCAATACTAAATCTATCA	TGCCACATCTACGCTGAAAAATAACGCTTAAGGTTTCTCAATTAACAATGCGGATCCCCGGGTTAATTAA	ACAGTAGGAGTAAATCTGGTTACAGCTTTAATGGAAGTTACGGGAAATCACGGATCCCCGGGTTAATTAA	GTCAGAAAGTAAAGCAAAAGAAAATTAATAAAGCAATACTAAATCTATCAGAATTCGAGCTCGTTTAAAC	0		0		0
YDL223C	HBT1	4	58275	61415	-	AAGATTTCCCAGTGGAGAGCTATCAAGAATATCACCCAACCCAAGATATG	GAGTGAGAAAAAGTATTTCTGGCGGTACTTTTGGATTTAGGAGTGAAATT	AAAAATAGATTTCAAAGAATACTGGGAATTTGTTAATCGAGAAGTGTTTA	AAGATTTCCCAGTGGAGAGCTATCAAGAATATCACCCAACCCAAGATATGCGGATCCCCGGGTTAATTAA	GAGTGAGAAAAAGTATTTCTGGCGGTACTTTTGGATTTAGGAGTGAAATTCGGATCCCCGGGTTAATTAA	AAAAATAGATTTCAAAGAATACTGGGAATTTGTTAATCGAGAAGTGTTTAGAATTCGAGCTCGTTTAAAC	0		0		0
YDL222C	FMP45	4	61882	62811	-	CTTTTTATCCAAGTAACAAGTAACACTAATCACTATAATCTACCGCTATG	TAGAACCAGCTGGGGATGGTGGTCTTGCCGGGCCAGTGACGGTACGCGAC	GGAAGAAAAAAAAAATTAGGAAGTATTTTATGGTGATTATTTCCTTCCTA	CTTTTTATCCAAGTAACAAGTAACACTAATCACTATAATCTACCGCTATGCGGATCCCCGGGTTAATTAA	TAGAACCAGCTGGGGATGGTGGTCTTGCCGGGCCAGTGACGGTACGCGACCGGATCCCCGGGTTAATTAA	GGAAGAAAAAAAAAATTAGGAAGTATTTTATGGTGATTATTTCCTTCCTAGAATTCGAGCTCGTTTAAAC	0		0		0
YDL221W	YDL221W	4	63021	63572	+	AACTGTTGCAAAGCAACCATCCTTTTATATGTCGGCATCTGCGCCGAATG	ATGAATGGCCGAGAAATTGTGCCAATTGCGTATATTTTTCCTCAAGAGGC	AAGAACTTTGCTTATTTTTTCAACCGCTCAAGCGCCTACTTACAGCGTCA	AACTGTTGCAAAGCAACCATCCTTTTATATGTCGGCATCTGCGCCGAATGCGGATCCCCGGGTTAATTAA	ATGAATGGCCGAGAAATTGTGCCAATTGCGTATATTTTTCCTCAAGAGGCCGGATCCCCGGGTTAATTAA	AAGAACTTTGCTTATTTTTTCAACCGCTCAAGCGCCTACTTACAGCGTCAGAATTCGAGCTCGTTTAAAC	1	YDL220C	1	YDL220C	0
YDL220C	CDC13,EST4	4	63254	66028	-	TATGTTTCTCTTTGGATACGAATGACCGTGGAAACTATCGCCTAAAAATG	TGAAAAAGGAGGAGGATAATGACGATGACGCCGGAGCCGTTCCCACCTCG	CGTCACTGCAATTTGGCACCGCCGCGTTGGGCTGCGCGGATCATGTCTTA	TATGTTTCTCTTTGGATACGAATGACCGTGGAAACTATCGCCTAAAAATGCGGATCCCCGGGTTAATTAA	TGAAAAAGGAGGAGGATAATGACGATGACGCCGGAGCCGTTCCCACCTCGCGGATCCCCGGGTTAATTAA	CGTCACTGCAATTTGGCACCGCCGCGTTGGGCTGCGCGGATCATGTCTTAGAATTCGAGCTCGTTTAAAC	1	YDL221W	1	YDL221W	0
YDL219W	DTD1	4	66252	66775	+	CATGTACATATTAAATAATCCACATATTATTCAGCAGCAGATTTACAATG	GCTCTTTAACTAATGAAGGGCCCGTTACAATCATTCTTGACAGTGACCAA	AATGTTTGCTTTTTATTTTCTTCTCGTATATATCTATAAGGTCAATCTTA	CATGTACATATTAAATAATCCACATATTATTCAGCAGCAGATTTACAATGCGGATCCCCGGGTTAATTAA	GCTCTTTAACTAATGAAGGGCCCGTTACAATCATTCTTGACAGTGACCAACGGATCCCCGGGTTAATTAA	AATGTTTGCTTTTTATTTTCTTCTCGTATATATCTATAAGGTCAATCTTAGAATTCGAGCTCGTTTAAAC	0		0		0
YDL218W	YDL218W	4	67502	68455	+	TTTTCAATTGAGGAACATAAACCAAATAGATACATTATATCAACGTTATG	CTATGAGTGGTAGCACTGCAGAACCAAACAGGAACGTCAATCAAATGCCA	AAAAAGTATGTGAAGGGTATAGACGAACAAAAAGGAAATCATTGAATTTA	TTTTCAATTGAGGAACATAAACCAAATAGATACATTATATCAACGTTATGCGGATCCCCGGGTTAATTAA	CTATGAGTGGTAGCACTGCAGAACCAAACAGGAACGTCAATCAAATGCCACGGATCCCCGGGTTAATTAA	AAAAAGTATGTGAAGGGTATAGACGAACAAAAAGGAAATCATTGAATTTAGAATTCGAGCTCGTTTAAAC	0		0		0
YDL217C	TIM22	4	68995	69618	-	TGCCAAATAAGATCAAGAAATTGTGATTTTAAATACTTTATACGAAGATG	TGTATATGAAAAGTGAGGATGGTAGACCACCACAAAACGATTTTAAAGAA	GATATTTACAAATATAAAACATTCATCGTTCGTCGAAATTCGTCTATTCA	TGCCAAATAAGATCAAGAAATTGTGATTTTAAATACTTTATACGAAGATGCGGATCCCCGGGTTAATTAA	TGTATATGAAAAGTGAGGATGGTAGACCACCACAAAACGATTTTAAAGAACGGATCCCCGGGTTAATTAA	GATATTTACAAATATAAAACATTCATCGTTCGTCGAAATTCGTCTATTCAGAATTCGAGCTCGTTTAAAC	0		0		0
YDL216C	RRI1,JAB1,CSN5	4	70009	71331	-	AAATGAATAACAACGATCGAAAATCAATAAAAACTGCAGGAGGCAGCATG	AGATAAAACAATATGAGCGGTTACGTTTTTACAAGGACACCTTTACATTA	CAGATAAACATAAGCTATTGCAGCGTCATTGGAGCAACGTTAGGAATTCA	AAATGAATAACAACGATCGAAAATCAATAAAAACTGCAGGAGGCAGCATGCGGATCCCCGGGTTAATTAA	AGATAAAACAATATGAGCGGTTACGTTTTTACAAGGACACCTTTACATTACGGATCCCCGGGTTAATTAA	CAGATAAACATAAGCTATTGCAGCGTCATTGGAGCAACGTTAGGAATTCAGAATTCGAGCTCGTTTAAAC	0		0		0
YDL215C	GDH2,GDHB,GDH-B	4	71653	74931	-	AACAAAACATACAAAACAAGGATATTAAATTCACAACAATAAAAAGAATG	AATTCTTGGAATTTATTGGTGGGTTAAAAAGAGAAGCGGAGGCAAGTGCT	CTTTTCTGACGGCAGAACTAATTTATACAAAACAATTTTATTGAAGCTCA	AACAAAACATACAAAACAAGGATATTAAATTCACAACAATAAAAAGAATGCGGATCCCCGGGTTAATTAA	AATTCTTGGAATTTATTGGTGGGTTAAAAAGAGAAGCGGAGGCAAGTGCTCGGATCCCCGGGTTAATTAA	CTTTTCTGACGGCAGAACTAATTTATACAAAACAATTTTATTGAAGCTCAGAATTCGAGCTCGTTTAAAC	0		0		0
YDL214C	PRR2	4	75452	77548	-	AACGTTCACAATAGCGTACGCAATTTTTTTACTTATCATACGGAGTGATG	CAAACATCGATCAACGATACGCCCACATTGGCGGCCTGCATCAGCGAACG	AGTAAAAGCTGGAGCATATGGCCAGTATGACATTGCTATTCTTCCAGTTA	AACGTTCACAATAGCGTACGCAATTTTTTTACTTATCATACGGAGTGATGCGGATCCCCGGGTTAATTAA	CAAACATCGATCAACGATACGCCCACATTGGCGGCCTGCATCAGCGAACGCGGATCCCCGGGTTAATTAA	AGTAAAAGCTGGAGCATATGGCCAGTATGACATTGCTATTCTTCCAGTTAGAATTCGAGCTCGTTTAAAC	0		0		0
YDL213C	NOP6	4	78291	78968	-	ATCTAATGTAGAGGACAGGATAGAGATTGAAGACGTCTACAGCTAAAATG	ACAAGCCTGTTCCTGCAGGAATTCATCCTGATAGAGCCAAACTACTCAAA	ATTTTCTTTTTGTCTAAGATACATGGCGTATAAAATTAAATTTGTACTCA	ATCTAATGTAGAGGACAGGATAGAGATTGAAGACGTCTACAGCTAAAATGCGGATCCCCGGGTTAATTAA	ACAAGCCTGTTCCTGCAGGAATTCATCCTGATAGAGCCAAACTACTCAAACGGATCCCCGGGTTAATTAA	ATTTTCTTTTTGTCTAAGATACATGGCGTATAAAATTAAATTTGTACTCAGAATTCGAGCTCGTTTAAAC	0		0		0
YDL212W	SHR3,APF1	4	79428	80060	+	ATTGGACTACAGAGCATAAAATCCCGTGATACGATAAAACTCTAACGATG	AGAATGATAACAAATCTAAAGGTGCTCAAAAGAGGAAGAACGCCAAAAAA	GACGGGAAAAGAGGGACAGAAAGAGAAAATGTTAAAAATATTATGGCCTA	ATTGGACTACAGAGCATAAAATCCCGTGATACGATAAAACTCTAACGATGCGGATCCCCGGGTTAATTAA	AGAATGATAACAAATCTAAAGGTGCTCAAAAGAGGAAGAACGCCAAAAAACGGATCCCCGGGTTAATTAA	GACGGGAAAAGAGGGACAGAAAGAGAAAATGTTAAAAATATTATGGCCTAGAATTCGAGCTCGTTTAAAC	0		0		0
YDL211C	YDL211C	4	80296	81414	-	AAAGGGGCGAGACAACTTGTTAATTCTTTATATTGCGATACTTCGTCATG	TTACTCGGCCAAATATTCAGCAAATTAATAGCTTTTTGAGAGAAATTATT	GCCTTGTTTAGAAGTACGAAAATCTTGGAATCCACTTTTTTCTATTTTTA	AAAGGGGCGAGACAACTTGTTAATTCTTTATATTGCGATACTTCGTCATGCGGATCCCCGGGTTAATTAA	TTACTCGGCCAAATATTCAGCAAATTAATAGCTTTTTGAGAGAAATTATTCGGATCCCCGGGTTAATTAA	GCCTTGTTTAGAAGTACGAAAATCTTGGAATCCACTTTTTTCTATTTTTAGAATTCGAGCTCGTTTAAAC	0		0		0
YDL210W	UGA4	4	85270	86985	+	TTCAGTTGTGAAGTGTAACAAGGTCTTATAATTTATTATTACTAACAATG	AAGCCGTTGGTGCTGATGTTATCGACACAATTATGTCCAAACAGGAACCA	AGACCTTATAAACTCTGAATATAAAATCTTTATAAAGGTTTGAACATTTA	TTCAGTTGTGAAGTGTAACAAGGTCTTATAATTTATTATTACTAACAATGCGGATCCCCGGGTTAATTAA	AAGCCGTTGGTGCTGATGTTATCGACACAATTATGTCCAAACAGGAACCACGGATCCCCGGGTTAATTAA	AGACCTTATAAACTCTGAATATAAAATCTTTATAAAGGTTTGAACATTTAGAATTCGAGCTCGTTTAAAC	0		0		0
YDL209C	CWC2,NTC40	4	87207	88226	-	GTAGTAACGACGTTAGTAAGACAGTATACGCATTGATAGAAATTTGAATG	TTGGTAAGCTTGGTGGTCCCTTGCTCGATTACCTCTCCTCTGATGAGGAT	AATGCGAATGGCAGATACTTAGAATTTGGTGGAAACAATTTTCTTCTCTA	GTAGTAACGACGTTAGTAAGACAGTATACGCATTGATAGAAATTTGAATGCGGATCCCCGGGTTAATTAA	TTGGTAAGCTTGGTGGTCCCTTGCTCGATTACCTCTCCTCTGATGAGGATCGGATCCCCGGGTTAATTAA	AATGCGAATGGCAGATACTTAGAATTTGGTGGAAACAATTTTCTTCTCTAGAATTCGAGCTCGTTTAAAC	0		0		0
YDL208W	NHP2	4	88512	88982	+	TCAATGGATCATTGGGTAACAGAGAAACGGAAACAAGTGCAGTAAAAATG	AAGAATACAAGGAATCTTTCAACGAAGTTGTCAAAGAAGTTCAAGCTTTA	TTTTTTATTCTTCTAGATTCCTAATATGGTTAAGAAGCGAACTTTTTTCA	TCAATGGATCATTGGGTAACAGAGAAACGGAAACAAGTGCAGTAAAAATGCGGATCCCCGGGTTAATTAA	AAGAATACAAGGAATCTTTCAACGAAGTTGTCAAAGAAGTTCAAGCTTTACGGATCCCCGGGTTAATTAA	TTTTTTATTCTTCTAGATTCCTAATATGGTTAAGAAGCGAACTTTTTTCAGAATTCGAGCTCGTTTAAAC	0		0		0
YDL207W	GLE1,BRR3,RSS1	4	89250	90866	+	AAGAGAATCGCGGGCCGTTGCTACAGGATATTCTGCAGAGTCGAAGAATG	TAGAAGCCTGGCAAAATAATAATATGGAGTCCTTTCCGGAAATGTCTCCT	ATTATAAAGTGTATTAGCATAATGTGCATATATAAGTTCAGAATTTTCTA	AAGAGAATCGCGGGCCGTTGCTACAGGATATTCTGCAGAGTCGAAGAATGCGGATCCCCGGGTTAATTAA	TAGAAGCCTGGCAAAATAATAATATGGAGTCCTTTCCGGAAATGTCTCCTCGGATCCCCGGGTTAATTAA	ATTATAAAGTGTATTAGCATAATGTGCATATATAAGTTCAGAATTTTCTAGAATTCGAGCTCGTTTAAAC	0		0		0
YDL206W	YDL206W	4	91178	93466	+	CTTTATTTGTAAATGCTACTCTTCATTTATCAAATTTTTTAAAGCAGATG	TGTATATAGTTGTCACATGTATTAGTGTTTTTTTAGAAGTTCACCAAGTG	TATTTATTATAGCTTGTATATAAAAAATGAAATCTTGATTTATTAAATTA	CTTTATTTGTAAATGCTACTCTTCATTTATCAAATTTTTTAAAGCAGATGCGGATCCCCGGGTTAATTAA	TGTATATAGTTGTCACATGTATTAGTGTTTTTTTAGAAGTTCACCAAGTGCGGATCCCCGGGTTAATTAA	TATTTATTATAGCTTGTATATAAAAAATGAAATCTTGATTTATTAAATTAGAATTCGAGCTCGTTTAAAC	0		0		0
YDL205C	HEM3	4	93764	94747	-	GCGAAGAAAATCTAGATAAATTTGTAGTTGGTAAATACACACGTACTATG	CCGATGGCGCAAAGAAAATTCTGGATGAAATTAATTTAGACAGAATCAAA	TTTAGTTAGTAATAATAGAGTTTTTGGACTGATCAAATTAATGGTGTTCA	GCGAAGAAAATCTAGATAAATTTGTAGTTGGTAAATACACACGTACTATGCGGATCCCCGGGTTAATTAA	CCGATGGCGCAAAGAAAATTCTGGATGAAATTAATTTAGACAGAATCAAACGGATCCCCGGGTTAATTAA	TTTAGTTAGTAATAATAGAGTTTTTGGACTGATCAAATTAATGGTGTTCAGAATTCGAGCTCGTTTAAAC	0		0		0
YDL204W	RTN2	4	95608	96789	+	TAACTTGTTCAATTGCTTGTCTCAACTTGCCACAAACTATCATCAACATG	AAACCTTACACAAAACCACGCACGGCCTAAAGCAAAAATTGCAACACGCA	AATGAACTACTAGCTAGAAAGAAGAGGAAAAAAAAAAAAAAACTAGATTA	TAACTTGTTCAATTGCTTGTCTCAACTTGCCACAAACTATCATCAACATGCGGATCCCCGGGTTAATTAA	AAACCTTACACAAAACCACGCACGGCCTAAAGCAAAAATTGCAACACGCACGGATCCCCGGGTTAATTAA	AATGAACTACTAGCTAGAAAGAAGAGGAAAAAAAAAAAAAAACTAGATTAGAATTCGAGCTCGTTTAAAC	0		0		0
YDL203C	ACK1	4	97085	98956	-	CAGAGTGTACCACCACGTTTTAATACTTTGTTTTAATACAGTAGGCAATG	CAAGAATGGGTTTTAGGAAGGCAGTTGATGCTCTTCGAAGTTTGACAAAT	TCCTGAATAATATTTGATTTATGGCATAATAAAGAAATGCGAATTCGTTA	CAGAGTGTACCACCACGTTTTAATACTTTGTTTTAATACAGTAGGCAATGCGGATCCCCGGGTTAATTAA	CAAGAATGGGTTTTAGGAAGGCAGTTGATGCTCTTCGAAGTTTGACAAATCGGATCCCCGGGTTAATTAA	TCCTGAATAATATTTGATTTATGGCATAATAAAGAAATGCGAATTCGTTAGAATTCGAGCTCGTTTAAAC	0		0		0
YDL202W	MRPL11	4	99478	100227	+	TTTAGACCTTATTGGAAGTGCTTGGGCGCGGAGTGTGATTATAAATAATG	CTAAAGAGGATGTGGAGTCAACTACAGATGCAGAATCGAAGGGATCAAAG	GAATAGTAAAACCTTTATAAAACTTGTTGAATTACGGGCATTTTCTTTTA	TTTAGACCTTATTGGAAGTGCTTGGGCGCGGAGTGTGATTATAAATAATGCGGATCCCCGGGTTAATTAA	CTAAAGAGGATGTGGAGTCAACTACAGATGCAGAATCGAAGGGATCAAAGCGGATCCCCGGGTTAATTAA	GAATAGTAAAACCTTTATAAAACTTGTTGAATTACGGGCATTTTCTTTTAGAATTCGAGCTCGTTTAAAC	0		0		0
YDL201W	TRM8	4	100561	101421	+	ATTCAGCAGTTCCCATAGGATAAAATTTTCAAGCGTTTATTGTTAAGATG	GTGACAAGTTCGTCGCTTGTTTCACAAGATTACCAACGCCAGCCATATTG	GAAATAGTTATGTATATGTGGTAAATTGTTCTAGTTATACATCTATGTTA	ATTCAGCAGTTCCCATAGGATAAAATTTTCAAGCGTTTATTGTTAAGATGCGGATCCCCGGGTTAATTAA	GTGACAAGTTCGTCGCTTGTTTCACAAGATTACCAACGCCAGCCATATTGCGGATCCCCGGGTTAATTAA	GAAATAGTTATGTATATGTGGTAAATTGTTCTAGTTATACATCTATGTTAGAATTCGAGCTCGTTTAAAC	0		0		0
YDL200C	MGT1,MGMT	4	101500	102066	-	AAAAAAAAATTGAAAACGGTCGCATTTTTGATCTAAATGGACCAACGATG	AACAGTTATTAAATAATGAAAAGGAAAATAGCTTAAGCCTTAGTAGATTG	TATACATAACTATTTCTTATGTTTTTTTCCTAAAATCCTTTATCCAACTA	AAAAAAAAATTGAAAACGGTCGCATTTTTGATCTAAATGGACCAACGATGCGGATCCCCGGGTTAATTAA	AACAGTTATTAAATAATGAAAAGGAAAATAGCTTAAGCCTTAGTAGATTGCGGATCCCCGGGTTAATTAA	TATACATAACTATTTCTTATGTTTTTTTCCTAAAATCCTTTATCCAACTAGAATTCGAGCTCGTTTAAAC	0		0		0
YDL199C	YDL199C	4	102291	104354	-	CTTAATACTACAGAGGAACCTGTTACTATCTCAGCTTTTTCAAGGAAATG	AACCCAGTTCAGGTGGGGGCCAGAATTCGCCTGGAGACATGGCAGTTGCC	CTAAACATTTATACTTAGGATGAAGCAAATATTTTTATGAGGCCATACTA	CTTAATACTACAGAGGAACCTGTTACTATCTCAGCTTTTTCAAGGAAATGCGGATCCCCGGGTTAATTAA	AACCCAGTTCAGGTGGGGGCCAGAATTCGCCTGGAGACATGGCAGTTGCCCGGATCCCCGGGTTAATTAA	CTAAACATTTATACTTAGGATGAAGCAAATATTTTTATGAGGCCATACTAGAATTCGAGCTCGTTTAAAC	0		0		0
YDL198C	GGC1,YHM1	4	104650	105552	-	GACATATATCAAACAAAGCATCTTCCAAAGTATTAGAAAAGGGAAATATG	TTGCGTTAGCTCAATCTTTGATACCTAGATTCGATAACCTGTTGAGCAAA	ATTCACAAGCTGAATGCCAAGGAAAATAGAGAAGAAGTTCATGTACTTCA	GACATATATCAAACAAAGCATCTTCCAAAGTATTAGAAAAGGGAAATATGCGGATCCCCGGGTTAATTAA	TTGCGTTAGCTCAATCTTTGATACCTAGATTCGATAACCTGTTGAGCAAACGGATCCCCGGGTTAATTAA	ATTCACAAGCTGAATGCCAAGGAAAATAGAGAAGAAGTTCATGTACTTCAGAATTCGAGCTCGTTTAAAC	0		0		0
YDL197C	ASF2	4	105918	107495	-	CTTCGATCAGTGGAGAAAGGAGGGAAAAAGGCCAAGACTGAGTGCTTATG	CTGTAGCACAAAGCTTGGCGGATTCAAAGCATTGTTCAGGACTACATAAA	GCAGATATGCGGATGCCGTAGTGATCTCTACCGCTTCGTATTTATATTTA	CTTCGATCAGTGGAGAAAGGAGGGAAAAAGGCCAAGACTGAGTGCTTATGCGGATCCCCGGGTTAATTAA	CTGTAGCACAAAGCTTGGCGGATTCAAAGCATTGTTCAGGACTACATAAACGGATCCCCGGGTTAATTAA	GCAGATATGCGGATGCCGTAGTGATCTCTACCGCTTCGTATTTATATTTAGAATTCGAGCTCGTTTAAAC	0		0		0
YDL196W	YDL196W	4	107742	108070	+	TACCTGCCTTGGTAGTTGGTTTCATAATTTACAATATACAAAGTTATATG	AACAAGTCGTGTCAGATCCATTCCTCTATTCCTGTAGTCGGGTTGCATTC	TTCTACACCTACAGTAGCGAAATAGTGCTGGTTCGTGACGTGTAAATTCA	TACCTGCCTTGGTAGTTGGTTTCATAATTTACAATATACAAAGTTATATGCGGATCCCCGGGTTAATTAA	AACAAGTCGTGTCAGATCCATTCCTCTATTCCTGTAGTCGGGTTGCATTCCGGATCCCCGGGTTAATTAA	TTCTACACCTACAGTAGCGAAATAGTGCTGGTTCGTGACGTGTAAATTCAGAATTCGAGCTCGTTTAAAC	0		0		0
YDL195W	SEC31,WEB1	4	108208	112029	+	CATATTTCCCTTTGTTCCCGTTTGCTCTCCCTAATTTAACAATAAAGATG	GGCTGACAGGAGTGAAGAGGTTGATTGGCATAGCTGAAGCGACTTTGAAT	AACAAGGCCAATACGCCACTTTTTGTACTGAAAGTTTTGAGACTGAATTA	CATATTTCCCTTTGTTCCCGTTTGCTCTCCCTAATTTAACAATAAAGATGCGGATCCCCGGGTTAATTAA	GGCTGACAGGAGTGAAGAGGTTGATTGGCATAGCTGAAGCGACTTTGAATCGGATCCCCGGGTTAATTAA	AACAAGGCCAATACGCCACTTTTTGTACTGAAAGTTTTGAGACTGAATTAGAATTCGAGCTCGTTTAAAC	0		0		0
YDL194W	SNF3	4	112580	115234	+	TAAACAGAAGGATATGCCTTTGTTGGCATAGAAAGAAGAATTTATAAATG	GCGAAGAAAACGCCACTAATCAACCTGTAAATGAAAATAATGATTTGAAA	TAAAATGCACGTCCGCTTAATTAATACATCGAATAACATTAAATTAATTA	TAAACAGAAGGATATGCCTTTGTTGGCATAGAAAGAAGAATTTATAAATGCGGATCCCCGGGTTAATTAA	GCGAAGAAAACGCCACTAATCAACCTGTAAATGAAAATAATGATTTGAAACGGATCCCCGGGTTAATTAA	TAAAATGCACGTCCGCTTAATTAATACATCGAATAACATTAAATTAATTAGAATTCGAGCTCGTTTAAAC	0		0		0
YDL193W	NUS1	4	115672	116799	+	TTTTGATACAATATATATACATATATTTTCCCCATTGTTTTTCTTAGATG	TCATCCGCGGCCTAAGACAGTACGCAGGATGTAAAGTGAATGTTGGTAAA	TTAAAAGGTTGAGCGAGATACTTATCTTTTCGTTTAGCTCTTAAGTATCA	TTTTGATACAATATATATACATATATTTTCCCCATTGTTTTTCTTAGATGCGGATCCCCGGGTTAATTAA	TCATCCGCGGCCTAAGACAGTACGCAGGATGTAAAGTGAATGTTGGTAAACGGATCCCCGGGTTAATTAA	TTAAAAGGTTGAGCGAGATACTTATCTTTTCGTTTAGCTCTTAAGTATCAGAATTCGAGCTCGTTTAAAC	0		0		0
YDL192W	ARF1	4	117322	117867	+	CATTGAAGGTATAAGAAAGAACTCAAACAGGTTTAATAGAATTAAAAATG	GTTTGTATGAAGGTTTGGAATGGTTAAGTAACAGTTTGAAAAACTCAACT	GTTTCATTTAGTTTATACAAGCGTATTTGATCCATATTCTAGAATTTTTA	CATTGAAGGTATAAGAAAGAACTCAAACAGGTTTAATAGAATTAAAAATGCGGATCCCCGGGTTAATTAA	GTTTGTATGAAGGTTTGGAATGGTTAAGTAACAGTTTGAAAAACTCAACTCGGATCCCCGGGTTAATTAA	GTTTCATTTAGTTTATACAAGCGTATTTGATCCATATTCTAGAATTTTTAGAATTCGAGCTCGTTTAAAC	0		0		0
YDL191W	RPL35A,SOS1	4	118667	119518	+	CACTACTATTGACCGTAGAATAGGTACAGTGAGACAGTATATTCGAAATG	AAAGAAAGAAGCAAATCGCTTTCCCACAAAGAAAGTACGCTATTAAGGCT	GAAAAGTTGGAACTATAGATAATGATAGTATATAATTGAACTTCCAATTA	CACTACTATTGACCGTAGAATAGGTACAGTGAGACAGTATATTCGAAATGCGGATCCCCGGGTTAATTAA	AAAGAAAGAAGCAAATCGCTTTCCCACAAAGAAAGTACGCTATTAAGGCTCGGATCCCCGGGTTAATTAA	GAAAAGTTGGAACTATAGATAATGATAGTATATAATTGAACTTCCAATTAGAATTCGAGCTCGTTTAAAC	0		0		0
YDL190C	UFD2	4	119708	122593	-	TAAGGGGAAAAGTTAGCTTTGAAAGTAGAACCCTCATTCCATAGATTATG	TTTGTTTCAAAAAACAAAAAAAGGAAGAAGCAAAACATAAAGCAAGCGAG	TTATTTGATTAGGGTCAATTTTGCAATTTATTCTATCACTTATTCATTCA	TAAGGGGAAAAGTTAGCTTTGAAAGTAGAACCCTCATTCCATAGATTATGCGGATCCCCGGGTTAATTAA	TTTGTTTCAAAAAACAAAAAAAGGAAGAAGCAAAACATAAAGCAAGCGAGCGGATCCCCGGGTTAATTAA	TTATTTGATTAGGGTCAATTTTGCAATTTATTCTATCACTTATTCATTCAGAATTCGAGCTCGTTTAAAC	0		0		0
YDL189W	RBS1	4	123217	124590	+	TATTCAAGTCTCTTCAAGTATATAAGGAGTTAGGGCAGAAGTAGGTGATG	CATCTAGGGATACTGATTCGGTAGAGATGAAATTTGATAAATTAAACATT	ATAAACCGTTACGTAATTTTTTCGCTATGTATAGTTCACTCCTCACGCTA	TATTCAAGTCTCTTCAAGTATATAAGGAGTTAGGGCAGAAGTAGGTGATGCGGATCCCCGGGTTAATTAA	CATCTAGGGATACTGATTCGGTAGAGATGAAATTTGATAAATTAAACATTCGGATCCCCGGGTTAATTAA	ATAAACCGTTACGTAATTTTTTCGCTATGTATAGTTCACTCCTCACGCTAGAATTCGAGCTCGTTTAAAC	0		0		0
YDL188C	PPH22,PPH2	4	124866	125999	-	TTTTATATTATTGGCACTTCTGTATAACTGGCTTTCATTCGAAAAAAATG	TGAGACCCGGTGAACCAACCGTCACCAGGAAGACACCGGATTATTTCTTA	GTTGGAATGAAATAGCGTAGTAAGGATAAAGGTGTAATAGATATATATTA	TTTTATATTATTGGCACTTCTGTATAACTGGCTTTCATTCGAAAAAAATGCGGATCCCCGGGTTAATTAA	TGAGACCCGGTGAACCAACCGTCACCAGGAAGACACCGGATTATTTCTTACGGATCCCCGGGTTAATTAA	GTTGGAATGAAATAGCGTAGTAAGGATAAAGGTGTAATAGATATATATTAGAATTCGAGCTCGTTTAAAC	0		0		0
YDL187C	YDL187C	4	126510	126839	-	ATATGGATGCGTGCCATTAATAGCTTCAATTGCGCCACGATGTGAAGATG	TCCACAAGTATATTCCATATAAAAGCACAGAACTACGAAGTGTCGCAAAT	TGTAATAATTTGGTGCGGTGTATGGGTTCAAGTTCCCAAAAAAACAACTA	ATATGGATGCGTGCCATTAATAGCTTCAATTGCGCCACGATGTGAAGATGCGGATCCCCGGGTTAATTAA	TCCACAAGTATATTCCATATAAAAGCACAGAACTACGAAGTGTCGCAAATCGGATCCCCGGGTTAATTAA	TGTAATAATTTGGTGCGGTGTATGGGTTCAAGTTCCCAAAAAAACAACTAGAATTCGAGCTCGTTTAAAC	1	YDL186W	1	YDL186W	0
YDL186W	YDL186W	4	126617	127450	+	CCTGGATGTAGATTTGCTTACAGATAGCCAAGAAATATTAGAAAAATATG	AATGCTGTACAGACTCCAACTGGGCGAGAATATTTTTTTGCCACCACGAT	TAGGAATAAAAAGAACAATAGATAGGACTATAGAAGCAAAGTGGAGTCTA	CCTGGATGTAGATTTGCTTACAGATAGCCAAGAAATATTAGAAAAATATGCGGATCCCCGGGTTAATTAA	AATGCTGTACAGACTCCAACTGGGCGAGAATATTTTTTTGCCACCACGATCGGATCCCCGGGTTAATTAA	TAGGAATAAAAAGAACAATAGATAGGACTATAGAAGCAAAGTGGAGTCTAGAATTCGAGCTCGTTTAAAC	1	YDL187C	1	YDL187C	0
YDL185C-A	YDL185C-A	4	127613	127840	-	AGAGACAGAATAGATGGCACCATATTCAGATTCAGCATGGTCTTCTAATG	ATCAAAATGTTGCAACCTTATCGAAAGAGCCATTTCTTGTTTTCAGCTTT	TTTTTCACATCTTTTTCCACGGCCGCTCAAAGGGGTCTCACACTGGATTA	AGAGACAGAATAGATGGCACCATATTCAGATTCAGCATGGTCTTCTAATGCGGATCCCCGGGTTAATTAA	ATCAAAATGTTGCAACCTTATCGAAAGAGCCATTTCTTGTTTTCAGCTTTCGGATCCCCGGGTTAATTAA	TTTTTCACATCTTTTTCCACGGCCGCTCAAAGGGGTCTCACACTGGATTAGAATTCGAGCTCGTTTAAAC	1	YDL185W	1	YDL185W	0
YDL185W	TFP1,VMA1,CLS8	4	127792	131007	+	TTCTTTCATTCTTAGAGTTAAAAAGCAAATAGAGAAGAAAAGAAACAATG	TCGAAAAATTGTTGAGCACTATGCAAGAAAGATTTGCTGAATCTACCGAT	GAAAAGACATCTAACAAATATACCAGAAGATAAATGCTACATATATCTTA	TTCTTTCATTCTTAGAGTTAAAAAGCAAATAGAGAAGAAAAGAAACAATGCGGATCCCCGGGTTAATTAA	TCGAAAAATTGTTGAGCACTATGCAAGAAAGATTTGCTGAATCTACCGATCGGATCCCCGGGTTAATTAA	GAAAAGACATCTAACAAATATACCAGAAGATAAATGCTACATATATCTTAGAATTCGAGCTCGTTTAAAC	1	YDL185C-A	1	YDL185C-A	0
YDL184C	RPL41A,RPL47A	4	131412	131489	-	CGTTCCATTTTGTAATAAAAGAACCAGACCACATCGATTCAATCGAAATG	GAACTAGAAGACTTAAGAGAAAGAGACGGAAGGTGAGAGCCAGATCCAAA	CTTGAAAGAATTTAAAACAAAATTAGAGTTATTTACTCATAATCCGCTTA	CGTTCCATTTTGTAATAAAAGAACCAGACCACATCGATTCAATCGAAATGCGGATCCCCGGGTTAATTAA	GAACTAGAAGACTTAAGAGAAAGAGACGGAAGGTGAGAGCCAGATCCAAACGGATCCCCGGGTTAATTAA	CTTGAAAGAATTTAAAACAAAATTAGAGTTATTTACTCATAATCCGCTTAGAATTCGAGCTCGTTTAAAC	0		0		0
YDL183C	YDL183C	4	131876	132838	-	ATTTTATCACAATACCAAAACTTCATCCGGTGTATTTTAGATTAAAGATG	TGAACAAAGTCATCCTTCAAGAATCGAAATCTCAAGAGAAAAACAAAATT	AGGAATACCTGTTATGTATATTTACATGAGATAGTGGACAATCTAAATTA	ATTTTATCACAATACCAAAACTTCATCCGGTGTATTTTAGATTAAAGATGCGGATCCCCGGGTTAATTAA	TGAACAAAGTCATCCTTCAAGAATCGAAATCTCAAGAGAAAAACAAAATTCGGATCCCCGGGTTAATTAA	AGGAATACCTGTTATGTATATTTACATGAGATAGTGGACAATCTAAATTAGAATTCGAGCTCGTTTAAAC	0		0		0
YDL182W	LYS20	4	134444	135730	+	TATCTACATAACAAACAAAGGAAGGACCCTGTATTGTTTTCCTAAAGATG	TACCGGAACTGGCCACCATCCCCGCCGCCAAGCGGACTAAGCCATCCGCC	TATCGTATGTAATAAGTGAAAGAACATAATGTAATGGTTTGGGAACGTTA	TATCTACATAACAAACAAAGGAAGGACCCTGTATTGTTTTCCTAAAGATGCGGATCCCCGGGTTAATTAA	TACCGGAACTGGCCACCATCCCCGCCGCCAAGCGGACTAAGCCATCCGCCCGGATCCCCGGGTTAATTAA	TATCGTATGTAATAAGTGAAAGAACATAATGTAATGGTTTGGGAACGTTAGAATTCGAGCTCGTTTAAAC	0		0		0
YDL181W	INH1	4	136186	136443	+	TTACACGCATTACTACAGCACACTTTTATACAGTTCCACAATAGAATATG	AACGAAAGAAGATTGATTCTTTGGAGAATAAAATTGACTCGATGACCAAA	AAGAATATTCTAAAAAAAAAAAAAAAAGCTTCTGCGGAAACGCATGATTA	TTACACGCATTACTACAGCACACTTTTATACAGTTCCACAATAGAATATGCGGATCCCCGGGTTAATTAA	AACGAAAGAAGATTGATTCTTTGGAGAATAAAATTGACTCGATGACCAAACGGATCCCCGGGTTAATTAA	AAGAATATTCTAAAAAAAAAAAAAAAAGCTTCTGCGGAAACGCATGATTAGAATTCGAGCTCGTTTAAAC	0		0		0
YDL180W	YDL180W	4	136901	138544	+	TCGTATTCTTTACACAAAAGAAAGATACCTGTGAAATATATCTGAATATG	CTTGGAGTCTTCTTGTTTTTGTAAGGGGAATACTTTCAACAGTTTATATA	TTTCAAGATATGAACACCCTAATATGTGCACGGTCGTTACTTATATGCTA	TCGTATTCTTTACACAAAAGAAAGATACCTGTGAAATATATCTGAATATGCGGATCCCCGGGTTAATTAA	CTTGGAGTCTTCTTGTTTTTGTAAGGGGAATACTTTCAACAGTTTATATACGGATCCCCGGGTTAATTAA	TTTCAAGATATGAACACCCTAATATGTGCACGGTCGTTACTTATATGCTAGAATTCGAGCTCGTTTAAAC	0		0		0
YDL179W	PCL9	4	140003	140917	+	TGTTTCGGTAACAGCATTATTAATTCTGAAGAAATACGCACAAAGAGATG	ACCAACGGTTAAATTTTACAAGGAGGGGCTGGTCATCGTTTTTCAAGCAA	ACGGAAAAGAATATTTATTGAGCTTGTAAAAGGCGAGTAACTTAGAATTA	TGTTTCGGTAACAGCATTATTAATTCTGAAGAAATACGCACAAAGAGATGCGGATCCCCGGGTTAATTAA	ACCAACGGTTAAATTTTACAAGGAGGGGCTGGTCATCGTTTTTCAAGCAACGGATCCCCGGGTTAATTAA	ACGGAAAAGAATATTTATTGAGCTTGTAAAAGGCGAGTAACTTAGAATTAGAATTCGAGCTCGTTTAAAC	0		0		0
YDL178W	DLD2,AIP2	4	141234	142826	+	TTTATTTTACAGACATTAATCCAGCACTACAAGTGGCATATAACAAGATG	TGAAGGTTCATTATGATCCTAATGGAATTTTAAACCCTTACAAATACATT	ATAAATATATACATATGTAGATAACTATAAAACTTGGCATTTTATTTTCA	TTTATTTTACAGACATTAATCCAGCACTACAAGTGGCATATAACAAGATGCGGATCCCCGGGTTAATTAA	TGAAGGTTCATTATGATCCTAATGGAATTTTAAACCCTTACAAATACATTCGGATCCCCGGGTTAATTAA	ATAAATATATACATATGTAGATAACTATAAAACTTGGCATTTTATTTTCAGAATTCGAGCTCGTTTAAAC	0		0		0
YDL177C	YDL177C	4	142921	143433	-	GATTCTTAGATAGGTATTGATGTTTGGTATTACTATTTTTTGGAGAAATG	ACATTTCAACATGTGCTGTGGAAACCTTAAAGAAGGGTGGATTTCTTCCT	CAATATTATATTCTACAATTGTGTATATTATATGGTAAGGGTGATATTTA	GATTCTTAGATAGGTATTGATGTTTGGTATTACTATTTTTTGGAGAAATGCGGATCCCCGGGTTAATTAA	ACATTTCAACATGTGCTGTGGAAACCTTAAAGAAGGGTGGATTTCTTCCTCGGATCCCCGGGTTAATTAA	CAATATTATATTCTACAATTGTGTATATTATATGGTAAGGGTGATATTTAGAATTCGAGCTCGTTTAAAC	0		0		0
YDL176W	YDL176W	4	143809	145935	+	TACACGCAGAAAGCGTCTTTCCACATAATCTGAACATTTTGTTATCGATG	ACGATGAAAAGGACCTTTATACATTCATTGTGAAAAAAGTAAAAAGAGAC	ACCTCATACGCTATTTTCTATTATGGCTAACATCTATGCAACTCAATTTA	TACACGCAGAAAGCGTCTTTCCACATAATCTGAACATTTTGTTATCGATGCGGATCCCCGGGTTAATTAA	ACGATGAAAAGGACCTTTATACATTCATTGTGAAAAAAGTAAAAAGAGACCGGATCCCCGGGTTAATTAA	ACCTCATACGCTATTTTCTATTATGGCTAACATCTATGCAACTCAATTTAGAATTCGAGCTCGTTTAAAC	0		0		0
YDL175C	AIR2	4	146193	147227	-	AACGTTACCTGTACAACGATAGCAGCTTACATCACTTCCTCGCAGTCATG	ACTACAATTCTTATCAACCATATAGGAGTGGTACCTTGGGGAAAAGAAGA	ATATAATGTAACCAAGAACAGCTTGTTAAAGGGCTTCCTATTTAAAGTTA	AACGTTACCTGTACAACGATAGCAGCTTACATCACTTCCTCGCAGTCATGCGGATCCCCGGGTTAATTAA	ACTACAATTCTTATCAACCATATAGGAGTGGTACCTTGGGGAAAAGAAGACGGATCCCCGGGTTAATTAA	ATATAATGTAACCAAGAACAGCTTGTTAAAGGGCTTCCTATTTAAAGTTAGAATTCGAGCTCGTTTAAAC	0		0		0
YDL174C	DLD1	4	147535	149298	-	AAATATTGTACATCATTCCGATCCAGCTGGAAACAAAAGCAAGAATAATG	CGGACAAAATCTTTAAAACTGATCCAAACGAGCCCGCTAATGATTACAGG	AATATATTTCAGGTTTACGTGAAGGGAGAAAAAGGAAAATCAGATACTCA	AAATATTGTACATCATTCCGATCCAGCTGGAAACAAAAGCAAGAATAATGCGGATCCCCGGGTTAATTAA	CGGACAAAATCTTTAAAACTGATCCAAACGAGCCCGCTAATGATTACAGGCGGATCCCCGGGTTAATTAA	AATATATTTCAGGTTTACGTGAAGGGAGAAAAAGGAAAATCAGATACTCAGAATTCGAGCTCGTTTAAAC	0		0		0
YDL173W	YDL173W	4	149905	150792	+	AAGCAGCAGCAGCGTTAGCAGCAGCAGTAGCGTAAGACCAAGTTAGTATG	AGAAGAAGAAGAAATCAGGGTTTTTCAGTTCTTTGAAAACTATGTTTAAT	ATTTATTTATTTTATTTAGTTTATTAATTTTGCTGATGAATGTTATTTCA	AAGCAGCAGCAGCGTTAGCAGCAGCAGTAGCGTAAGACCAAGTTAGTATGCGGATCCCCGGGTTAATTAA	AGAAGAAGAAGAAATCAGGGTTTTTCAGTTCTTTGAAAACTATGTTTAATCGGATCCCCGGGTTAATTAA	ATTTATTTATTTTATTTAGTTTATTAATTTTGCTGATGAATGTTATTTCAGAATTCGAGCTCGTTTAAAC	1	YDL172C	1	YDL172C	0
YDL172C	YDL172C	4	150321	150800	-	ATTTATTTATTTATTTATTTTATTTAGTTTATTAATTTTGCTGATGAATG	CGACAATTGGGGCGTTGTTGTCCGGAGACGAAGTGGTGGCATGCAAAGAC	AACCCGGTGACCAACACCAGGTCTCGTATCAGCGCTACAAGGAGCCATCA	ATTTATTTATTTATTTATTTTATTTAGTTTATTAATTTTGCTGATGAATGCGGATCCCCGGGTTAATTAA	CGACAATTGGGGCGTTGTTGTCCGGAGACGAAGTGGTGGCATGCAAAGACCGGATCCCCGGGTTAATTAA	AACCCGGTGACCAACACCAGGTCTCGTATCAGCGCTACAAGGAGCCATCAGAATTCGAGCTCGTTTAAAC	1	YDL173W	1	YDL173W	0
YDL171C	GLT1	4	150897	157334	-	CCATTTATTTATTTTGAAGAACTAGAGAAAGAATTAGAAAAGAAAGCATG	GTATCGTTCAACGTGATTACAAACTATTGAAAGAATTAGCTAGTCAAGTC	ATAAATAAATAATATACGATCATAAAATAAATAATAACTCAAGCTTTTTA	CCATTTATTTATTTTGAAGAACTAGAGAAAGAATTAGAAAAGAAAGCATGCGGATCCCCGGGTTAATTAA	GTATCGTTCAACGTGATTACAAACTATTGAAAGAATTAGCTAGTCAAGTCCGGATCCCCGGGTTAATTAA	ATAAATAAATAATATACGATCATAAAATAAATAATAACTCAAGCTTTTTAGAATTCGAGCTCGTTTAAAC	0		0		0
YDL170W	UGA3	4	158011	159597	+	TTGTTCATGTATGGATGCCAAGAAAACAAAGTTTTTTAAAGTAAGGTATG	ATGACCTGGTCCACATGATTGACGAATTAGATTACAATATTAATTTTGCC	CAATAATTTAAGACACCCAGGGGGTGGGGAAAGGAAATATATGCTGCTCA	TTGTTCATGTATGGATGCCAAGAAAACAAAGTTTTTTAAAGTAAGGTATGCGGATCCCCGGGTTAATTAA	ATGACCTGGTCCACATGATTGACGAATTAGATTACAATATTAATTTTGCCCGGATCCCCGGGTTAATTAA	CAATAATTTAAGACACCCAGGGGGTGGGGAAAGGAAATATATGCTGCTCAGAATTCGAGCTCGTTTAAAC	0		0		0
YDL169C	UGX2	4	159758	160429	-	TTAAATGCAGATAGTTATATCGTGTTCATAACCACTACTGAAGAGTCATG	AGGTGGACTCGGACACCCCTGAAAATAATCACCTAAAATGGTTAATTAAA	TTATACGTATACAATATAGAAATGCTAACGTTGAGACATAGAAGTAATTA	TTAAATGCAGATAGTTATATCGTGTTCATAACCACTACTGAAGAGTCATGCGGATCCCCGGGTTAATTAA	AGGTGGACTCGGACACCCCTGAAAATAATCACCTAAAATGGTTAATTAAACGGATCCCCGGGTTAATTAA	TTATACGTATACAATATAGAAATGCTAACGTTGAGACATAGAAGTAATTAGAATTCGAGCTCGTTTAAAC	0		0		0
YDL168W	SFA1,ADH5	4	161299	162459	+	TCTACAAAATCTCCAAGTAAAGAAGGAATATAAGTAATATAAGTAGAATG	TGCATAACGGTGATTGCTTGAGAACCGTCTTGAAGTCTGATGAAATAAAA	TATTCCAGAAAATTTGAGTCATGCTTACTTAGTTTAATTAAGTACTCCTA	TCTACAAAATCTCCAAGTAAAGAAGGAATATAAGTAATATAAGTAGAATGCGGATCCCCGGGTTAATTAA	TGCATAACGGTGATTGCTTGAGAACCGTCTTGAAGTCTGATGAAATAAAACGGATCCCCGGGTTAATTAA	TATTCCAGAAAATTTGAGTCATGCTTACTTAGTTTAATTAAGTACTCCTAGAATTCGAGCTCGTTTAAAC	0		0		0
YDL167C	NRP1	4	162690	164849	-	CGCTAGGATAATTGTGCATTGCTATTGTGATTTTTGATACAGAAATTATG	TTGGTGATAATAGCGCTTTCGGTAATGGTTTTAATAGTTCGGTACGTTGG	AAATACAATGTGGTTGTGTGAAATTTATTGACCTCGCCTGTTCCTAACTA	CGCTAGGATAATTGTGCATTGCTATTGTGATTTTTGATACAGAAATTATGCGGATCCCCGGGTTAATTAA	TTGGTGATAATAGCGCTTTCGGTAATGGTTTTAATAGTTCGGTACGTTGGCGGATCCCCGGGTTAATTAA	AAATACAATGTGGTTGTGTGAAATTTATTGACCTCGCCTGTTCCTAACTAGAATTCGAGCTCGTTTAAAC	0		0		0
YDL166C	FAP7	4	165144	165737	-	ATAGAAAGGAACTATTAGAAAATAAAGAAATACTTTGTTATATAGAGATG	ATGAATATCAAGGGCCTCGTAGCGATGACGAAGACGATGAAGACAGTGAG	TTACAATTATATATGTATATATGTAGATACACAAAGTTATGGAACGCCTA	ATAGAAAGGAACTATTAGAAAATAAAGAAATACTTTGTTATATAGAGATGCGGATCCCCGGGTTAATTAA	ATGAATATCAAGGGCCTCGTAGCGATGACGAAGACGATGAAGACAGTGAGCGGATCCCCGGGTTAATTAA	TTACAATTATATATGTATATATGTAGATACACAAAGTTATGGAACGCCTAGAATTCGAGCTCGTTTAAAC	0		0		0
YDL165W	CDC36,NOT2,DNA19	4	165985	166560	+	GGAAAAACAGGAAAAGAAGAGAATCAAAATATACTATTGCCTACATAATG	GGTGGGAAAAGTGCCAAAGAGATTTCTTATTGTTTTATAATGCTATTATG	ATCACATATAATGACATTTATTTACTTCTTTCGTTTCTCTGTCTACCTTA	GGAAAAACAGGAAAAGAAGAGAATCAAAATATACTATTGCCTACATAATGCGGATCCCCGGGTTAATTAA	GGTGGGAAAAGTGCCAAAGAGATTTCTTATTGTTTTATAATGCTATTATGCGGATCCCCGGGTTAATTAA	ATCACATATAATGACATTTATTTACTTCTTTCGTTTCTCTGTCTACCTTAGAATTCGAGCTCGTTTAAAC	0		0		0
YDL164C	CDC9,MMS8	4	166683	168950	-	ATTTTGAAGGTTTAGAGCAGCTTTTAACGTCATTGTTCATCAATTACATG	CTTCTGACCAGATCGTCGAATTGTATGAAAACCAATCCCACATGCAAAAT	CTCTTTTTTTTTTTTTAATGATTAATTGAGAAAAATAGTGTGCACATTTA	ATTTTGAAGGTTTAGAGCAGCTTTTAACGTCATTGTTCATCAATTACATGCGGATCCCCGGGTTAATTAA	CTTCTGACCAGATCGTCGAATTGTATGAAAACCAATCCCACATGCAAAATCGGATCCCCGGGTTAATTAA	CTCTTTTTTTTTTTTTAATGATTAATTGAGAAAAATAGTGTGCACATTTAGAATTCGAGCTCGTTTAAAC	1	YDL163W	1	YDL163W	0
YDL163W	YDL163W	4	168652	168954	+	CACCGGAAGAGGGAGCGGATGATGGTATAGAAGAAAAATTGCTACCCATG	TCAAGGGACGTGCAGATGAAAGAAGGCAACCGGTCAGTAATCTGCGCATG	AATGATTTTGAAGGTTTAGAGCAGCTTTTAACGTCATTGTTCATCAATTA	CACCGGAAGAGGGAGCGGATGATGGTATAGAAGAAAAATTGCTACCCATGCGGATCCCCGGGTTAATTAA	TCAAGGGACGTGCAGATGAAAGAAGGCAACCGGTCAGTAATCTGCGCATGCGGATCCCCGGGTTAATTAA	AATGATTTTGAAGGTTTAGAGCAGCTTTTAACGTCATTGTTCATCAATTAGAATTCGAGCTCGTTTAAAC	1	YDL164C	1	YDL164C	0
YDL162C	YDL162C	4	169055	169409	-	AGTACCCTTTCACCAAATTCTTCGCAGATCTAACAAATTGTTTCGACATG	TGGCTGATGGAATTTTTCACCTTAACGCGAAAACGCGTGAAAGTGAAATT	ATTTTTGAACAAAGTACAGCGAGATGCAAACGCATGGCTTATTGCAGCTA	AGTACCCTTTCACCAAATTCTTCGCAGATCTAACAAATTGTTTCGACATGCGGATCCCCGGGTTAATTAA	TGGCTGATGGAATTTTTCACCTTAACGCGAAAACGCGTGAAAGTGAAATTCGGATCCCCGGGTTAATTAA	ATTTTTGAACAAAGTACAGCGAGATGCAAACGCATGGCTTATTGCAGCTAGAATTCGAGCTCGTTTAAAC	1	YDL161W	1	YDL161W	0
YDL161W	ENT1	4	169408	170772	+	TATGAGTGCCAGGATCAGAAGGAAAGGGAGCAAGAGGCAGAACAATCATG	AGTCTCAAAATAATGGCTCAAATAACCGGGGATATACTCTAATTGATTTA	AAAATGCTCATCTGATTAGAAATGCGGACTGGAATGACAGAATCACTTCA	TATGAGTGCCAGGATCAGAAGGAAAGGGAGCAAGAGGCAGAACAATCATGCGGATCCCCGGGTTAATTAA	AGTCTCAAAATAATGGCTCAAATAACCGGGGATATACTCTAATTGATTTACGGATCCCCGGGTTAATTAA	AAAATGCTCATCTGATTAGAAATGCGGACTGGAATGACAGAATCACTTCAGAATTCGAGCTCGTTTAAAC	1	YDL162C	1	YDL162C	0
YDL160C-A	YDL160C-A	4	171060	171302	-	TATTGCACTTAGAAAGGACATGAGTACAGAGCACAGTAATTGTGGTGATG	TATCGCATCAAGATTTAGAGCGTATCGTAGGGCTTCTTCTGATGGATATG	AGGAATGTCTTATGTCTTTACATGGATGTAATGTAAGTTGAATACTTTTA	TATTGCACTTAGAAAGGACATGAGTACAGAGCACAGTAATTGTGGTGATGCGGATCCCCGGGTTAATTAA	TATCGCATCAAGATTTAGAGCGTATCGTAGGGCTTCTTCTGATGGATATGCGGATCCCCGGGTTAATTAA	AGGAATGTCTTATGTCTTTACATGGATGTAATGTAAGTTGAATACTTTTAGAATTCGAGCTCGTTTAAAC	0		0		0
YDL160C	DHH1	4	172088	173608	-	ATAACTTATCCCAGGCCTAAAATACGACAAGAAAGAAAATAGTAGTAATG	AGCAGGAGCATTTCATGGCGATGCCACCTGGTCAGTCACAACCCCAGTAT	AAAAAAAGCGTATCTCACCACAGTAGTTATTTTTTCTTAGATATTCTTTA	ATAACTTATCCCAGGCCTAAAATACGACAAGAAAGAAAATAGTAGTAATGCGGATCCCCGGGTTAATTAA	AGCAGGAGCATTTCATGGCGATGCCACCTGGTCAGTCACAACCCCAGTATCGGATCCCCGGGTTAATTAA	AAAAAAAGCGTATCTCACCACAGTAGTTATTTTTTCTTAGATATTCTTTAGAATTCGAGCTCGTTTAAAC	0		0		0
YDL159W-A	YDL159W-A	4	173860	173991	+	TAAAAGAATGTGGATGAAACAAAACTGAATCCAATGATGAGAAATAAATG	CTAAGATTGTGTTGTCCTTTTTCTTACGAAATTTTTTTCCCTCCCTTTTT	TATGATATCGCCGTTACCCCACGAATCACTTATAACGAGGACAGTGATCA	TAAAAGAATGTGGATGAAACAAAACTGAATCCAATGATGAGAAATAAATGCGGATCCCCGGGTTAATTAA	CTAAGATTGTGTTGTCCTTTTTCTTACGAAATTTTTTTCCCTCCCTTTTTCGGATCCCCGGGTTAATTAA	TATGATATCGCCGTTACCCCACGAATCACTTATAACGAGGACAGTGATCAGAATTCGAGCTCGTTTAAAC	0		0		0
YDL159W	STE7	4	174159	175706	+	CATCGGATCATATCTGTTTTTGCAGCGTGGTATATTGGTTGTTGGTCATG	CCTTGGACCGTGCCAAGTTAGAAAAGAAACAATCGGAAAGATCAACCCAT	TGTGAAAAAAAGTGCAATATGTTCCTAACTAATGTTATCGCATGCATTCA	CATCGGATCATATCTGTTTTTGCAGCGTGGTATATTGGTTGTTGGTCATGCGGATCCCCGGGTTAATTAA	CCTTGGACCGTGCCAAGTTAGAAAAGAAACAATCGGAAAGATCAACCCATCGGATCCCCGGGTTAATTAA	TGTGAAAAAAAGTGCAATATGTTCCTAACTAATGTTATCGCATGCATTCAGAATTCGAGCTCGTTTAAAC	2	YDL159C-B;YDL158C	2	YDL159C-B;YDL158C	0
YDL159C-B	YDL159C-B	4	174734	174910	-	TTTCATTATTTATATGCTGGTTATAATAAGCTCCATAGAAGGTGATAATG	GTAGTGCCTTCACCACAGTTCCAGAATTTCCAGCACCAATTTTCCCCAAC	TTGTCGGGAACTTCAAATGGTAATTATATACAACTCCAGGACTTGGTTCA	TTTCATTATTTATATGCTGGTTATAATAAGCTCCATAGAAGGTGATAATGCGGATCCCCGGGTTAATTAA	GTAGTGCCTTCACCACAGTTCCAGAATTTCCAGCACCAATTTTCCCCAACCGGATCCCCGGGTTAATTAA	TTGTCGGGAACTTCAAATGGTAATTATATACAACTCCAGGACTTGGTTCAGAATTCGAGCTCGTTTAAAC	1	YDL159W	1	YDL159W	0
YDL158C	YDL158C	4	175544	175855	-	AAGCTTCTCTCAATCGTGAAATTTTCTGTACATAAAGTGCTACTTTGATG	GTCTAAATTTATCATCTTTAGACGGTGATACGTATTTCATTATAAGATCA	TGTATTAAGAATGAAAGGGAAAGGTCATCGATTCATGAATTGCTACATCA	AAGCTTCTCTCAATCGTGAAATTTTCTGTACATAAAGTGCTACTTTGATGCGGATCCCCGGGTTAATTAA	GTCTAAATTTATCATCTTTAGACGGTGATACGTATTTCATTATAAGATCACGGATCCCCGGGTTAATTAA	TGTATTAAGAATGAAAGGGAAAGGTCATCGATTCATGAATTGCTACATCAGAATTCGAGCTCGTTTAAAC	1	YDL159W	1	YDL159W	0
YDL157C	YDL157C	4	175913	176269	-	AGGAAACAAAACACCGCTTAGAGAGAAACAGCAAGTGGTGAAAAACAATG	AATATAAGAACTATAAGAAATTAAGTAACGATGGTGAAACACAGGCTAAC	CTTTATGTACAGAAAATTTCACGATTGAGAGAAGCTTGCGAATAATACTA	AGGAAACAAAACACCGCTTAGAGAGAAACAGCAAGTGGTGAAAAACAATGCGGATCCCCGGGTTAATTAA	AATATAAGAACTATAAGAAATTAAGTAACGATGGTGAAACACAGGCTAACCGGATCCCCGGGTTAATTAA	CTTTATGTACAGAAAATTTCACGATTGAGAGAAGCTTGCGAATAATACTAGAATTCGAGCTCGTTTAAAC	0		0		0
YDL156W	YDL156W	4	176599	178167	+	ATCTATTTTAGTACGGTAATTAAAAGAAAGCTGCCTTTCAGTCAAGAATG	GCAAAATATTCCTCTTTACTGATGACTCCGGAACCATAAAGCAGGAAGAA	CTGAAAAGCGGGAGGGAAAAAAGGCAGTGCGGGTAACTGAGATGTTTTCA	ATCTATTTTAGTACGGTAATTAAAAGAAAGCTGCCTTTCAGTCAAGAATGCGGATCCCCGGGTTAATTAA	GCAAAATATTCCTCTTTACTGATGACTCCGGAACCATAAAGCAGGAAGAACGGATCCCCGGGTTAATTAA	CTGAAAAGCGGGAGGGAAAAAAGGCAGTGCGGGTAACTGAGATGTTTTCAGAATTCGAGCTCGTTTAAAC	0		0		0
YDL155W	CLB3	4	178454	179737	+	TTTAAAACATAGAGATATTTTGTCCTTTTTATCATTGCTTATTATAAATG	TCGTAGCGAAGTGGATAGCATTAGCTGAGCACAGAGTAGAAAGATCTAAC	ATGAATCCTTTTTCCTTTGTTGATGCCATGTCTCGAGCTGAGGCTATTTA	TTTAAAACATAGAGATATTTTGTCCTTTTTATCATTGCTTATTATAAATGCGGATCCCCGGGTTAATTAA	TCGTAGCGAAGTGGATAGCATTAGCTGAGCACAGAGTAGAAAGATCTAACCGGATCCCCGGGTTAATTAA	ATGAATCCTTTTTCCTTTGTTGATGCCATGTCTCGAGCTGAGGCTATTTAGAATTCGAGCTCGTTTAAAC	0		0		0
YDL154W	MSH5	4	180015	182720	+	CTCATTCAAAATAACTTACTCATTCATATACTGCCACCAAATGGAATATG	CTACAACAACTTCCGAGAATCTCAGGCTTAAATTGAAAAATTTCCTTCGC	TTAACTTAAATATGTTACAAGTAAGCGTTTTTTTATTCTTTGATATATTA	CTCATTCAAAATAACTTACTCATTCATATACTGCCACCAAATGGAATATGCGGATCCCCGGGTTAATTAA	CTACAACAACTTCCGAGAATCTCAGGCTTAAATTGAAAAATTTCCTTCGCCGGATCCCCGGGTTAATTAA	TTAACTTAAATATGTTACAAGTAAGCGTTTTTTTATTCTTTGATATATTAGAATTCGAGCTCGTTTAAAC	0		0		0
YDL153C	SAS10,UTP3	4	182867	184693	-	AGTTTTGGAGGAAGAGAAAACATATTAGAGTGGGTGTATAGAATAATATG	AAAAGACAGGTATCAAGAAGGGTTTGACGAGGTCTGTTAAATTCAAGAAT	AAATTTTGACACCACTACTTGGGTAAATACTACATATGTAAATTTTTTTA	AGTTTTGGAGGAAGAGAAAACATATTAGAGTGGGTGTATAGAATAATATGCGGATCCCCGGGTTAATTAA	AAAAGACAGGTATCAAGAAGGGTTTGACGAGGTCTGTTAAATTCAAGAATCGGATCCCCGGGTTAATTAA	AAATTTTGACACCACTACTTGGGTAAATACTACATATGTAAATTTTTTTAGAATTCGAGCTCGTTTAAAC	1	YDL152W	1	YDL152W	0
YDL152W	YDL152W	4	184497	184862	+	CTTCTTCCTCATCTTCTCTTTCATCTATTGACTCATCATCTTCATCCATG	CAGAAGCGCAGTTTGAAAATTTTTCATCCGCCCTGCAAAGTCCAATTTTT	ATTGTTCTCTTGAATACCATAATTCTCTGGTCATTATCTTCTGCTGATCA	CTTCTTCCTCATCTTCTCTTTCATCTATTGACTCATCATCTTCATCCATGCGGATCCCCGGGTTAATTAA	CAGAAGCGCAGTTTGAAAATTTTTCATCCGCCCTGCAAAGTCCAATTTTTCGGATCCCCGGGTTAATTAA	ATTGTTCTCTTGAATACCATAATTCTCTGGTCATTATCTTCTGCTGATCAGAATTCGAGCTCGTTTAAAC	1	YDL153C	1	YDL153C	0
YDL151C	BUD30	4	184993	185574	-	CAGGGAATAACTGTTCAATCCGTTTAGATCTCCACTCTTCGTCATCCATG	AGCGCCCATTTCCTTTATTACTGCTCATACTTAATGAATGCTATCCCGCT	ATAATTTGCTAGACTAACCGAAAGTCGAAGCGTAATCTTGTTTTTTATTA	CAGGGAATAACTGTTCAATCCGTTTAGATCTCCACTCTTCGTCATCCATGCGGATCCCCGGGTTAATTAA	AGCGCCCATTTCCTTTATTACTGCTCATACTTAATGAATGCTATCCCGCTCGGATCCCCGGGTTAATTAA	ATAATTTGCTAGACTAACCGAAAGTCGAAGCGTAATCTTGTTTTTTATTAGAATTCGAGCTCGTTTAAAC	1	YDL150W	1	YDL150W	0
YDL150W	RPC53,RPC4	4	185018	186286	+	CGAAGCGTAATCTTGTTTTTTATTAAGCGGGATAGCATTCATTAAGTATG	CGGAACTTCTAGGCCGTGTGGACGGTAAAATAGTAGTCACACCTCAAATC	TTATGACTGTGTATATTCATTTATATACTCGACAGATGCGAGTGCGATTA	CGAAGCGTAATCTTGTTTTTTATTAAGCGGGATAGCATTCATTAAGTATGCGGATCCCCGGGTTAATTAA	CGGAACTTCTAGGCCGTGTGGACGGTAAAATAGTAGTCACACCTCAAATCCGGATCCCCGGGTTAATTAA	TTATGACTGTGTATATTCATTTATATACTCGACAGATGCGAGTGCGATTAGAATTCGAGCTCGTTTAAAC	1	YDL151C	1	YDL151C	0
YDL149W	ATG9,APG9,CVT7,AUT9	4	186601	189594	+	ACATTTAAGAACAGCTTGAAATATCAAAATCACGGAATTATTAGGTTATG	GTGTCTTAGGACTTGTTAAAGAGTATTACAAGAAGTCTGACGTCGGAAGA	AGTTATATATATAGTTATATTGGATGATGTACACGACACAGTCTGCCTTA	ACATTTAAGAACAGCTTGAAATATCAAAATCACGGAATTATTAGGTTATGCGGATCCCCGGGTTAATTAA	GTGTCTTAGGACTTGTTAAAGAGTATTACAAGAAGTCTGACGTCGGAAGACGGATCCCCGGGTTAATTAA	AGTTATATATATAGTTATATTGGATGATGTACACGACACAGTCTGCCTTAGAATTCGAGCTCGTTTAAAC	0		0		0
YDL148C	NOP14,UTP2	4	189830	192262	-	CTGTAAATAGTACAGTTGAGAAGCAAATACAAGGGAAGATCAAATACATG	CGGAAAAAAACAAGTATGAAAGAGAAAGAAAACTACGTGGCGGAAAGAAA	GAGAAGCCTAATAAGAAAAAAAGAGGTTAATAAATTATTATTACTGGTTA	CTGTAAATAGTACAGTTGAGAAGCAAATACAAGGGAAGATCAAATACATGCGGATCCCCGGGTTAATTAA	CGGAAAAAAACAAGTATGAAAGAGAAAGAAAACTACGTGGCGGAAAGAAACGGATCCCCGGGTTAATTAA	GAGAAGCCTAATAAGAAAAAAAGAGGTTAATAAATTATTATTACTGGTTAGAATTCGAGCTCGTTTAAAC	0		0		0
YDL147W	RPN5,NAS5	4	192600	193937	+	TGCTGGGCTCAGTACCATTTTTGTTGCTAGAGTAAACGTAGAGAAAGATG	TAGGCCATTTAATTACAAAAGAGGAAATCATGCACGGTCTGCAAGCTAAA	AATCAAAACCGGATCTGAGATAATCCGACAGTTACTCGAAAATCTCTTCA	TGCTGGGCTCAGTACCATTTTTGTTGCTAGAGTAAACGTAGAGAAAGATGCGGATCCCCGGGTTAATTAA	TAGGCCATTTAATTACAAAAGAGGAAATCATGCACGGTCTGCAAGCTAAACGGATCCCCGGGTTAATTAA	AATCAAAACCGGATCTGAGATAATCCGACAGTTACTCGAAAATCTCTTCAGAATTCGAGCTCGTTTAAAC	0		0		0
YDL146W	LDB17	4	194425	195900	+	ACTTTAGCCTATACTTTCTTCGAACATTTTTCCTTTCATTTTGACTCATG	CGCCTCCGCCTCCTCCTCCTCCTCCATCAAGAAAATGTGGAACTCCAAAA	AAATGGTCGGAAGAACCACATTAATGCAAGAGGAAATAATGCTTTACTTA	ACTTTAGCCTATACTTTCTTCGAACATTTTTCCTTTCATTTTGACTCATGCGGATCCCCGGGTTAATTAA	CGCCTCCGCCTCCTCCTCCTCCTCCATCAAGAAAATGTGGAACTCCAAAACGGATCCCCGGGTTAATTAA	AAATGGTCGGAAGAACCACATTAATGCAAGAGGAAATAATGCTTTACTTAGAATTCGAGCTCGTTTAAAC	0		0		0
YDL145C	COP1,SOO1,RET1,SEC33	4	196246	199851	-	CTTTTTTTCTTCTGTAGTGTCTTTGTTCATTTCATTACTGGATCAAGATG	CTATGATTTCTAAGATCGGTGCACCTGCATCCGGATTAAGAATACGTGTA	GGTCGAGCAGAATACAATCCCGAGAAAATCAATAGGCAAAATAGCATTTA	CTTTTTTTCTTCTGTAGTGTCTTTGTTCATTTCATTACTGGATCAAGATGCGGATCCCCGGGTTAATTAA	CTATGATTTCTAAGATCGGTGCACCTGCATCCGGATTAAGAATACGTGTACGGATCCCCGGGTTAATTAA	GGTCGAGCAGAATACAATCCCGAGAAAATCAATAGGCAAAATAGCATTTAGAATTCGAGCTCGTTTAAAC	0		0		0
YDL144C	YDL144C	4	200336	201406	-	TACAGTCCCGGTGCCAGGATACAAGTTGGCATAAGCTAATGTCGAAAATG	GGAAAGGCCTATTGAAGTTCGACGAAAAAACTGCCACTCTTGTGGACGAG	CAATATACTAGATGAAGGCTCGTCAACGAGGCAAGCAATGGTTGAAACTA	TACAGTCCCGGTGCCAGGATACAAGTTGGCATAAGCTAATGTCGAAAATGCGGATCCCCGGGTTAATTAA	GGAAAGGCCTATTGAAGTTCGACGAAAAAACTGCCACTCTTGTGGACGAGCGGATCCCCGGGTTAATTAA	CAATATACTAGATGAAGGCTCGTCAACGAGGCAAGCAATGGTTGAAACTAGAATTCGAGCTCGTTTAAAC	0		0		0
YDL143W	CCT4,ANC2,TCP4	4	201670	203256	+	TGGAGGTGCGGCAAGTGTGCAAGACGGGTAAAGGAGAGTATAGAACGATG	CTGAATGTGTTAAATCCATCTTACGTATTGATGATATTGCATTCAGCCGT	ATATATATGTATATATGCATAAACATATGGATACTGGGAAACCCATGTTA	TGGAGGTGCGGCAAGTGTGCAAGACGGGTAAAGGAGAGTATAGAACGATGCGGATCCCCGGGTTAATTAA	CTGAATGTGTTAAATCCATCTTACGTATTGATGATATTGCATTCAGCCGTCGGATCCCCGGGTTAATTAA	ATATATATGTATATATGCATAAACATATGGATACTGGGAAACCCATGTTAGAATTCGAGCTCGTTTAAAC	0		0		0
YDL142C	CRD1,CLS1	4	203394	204245	-	AAACAAGCAGGCCTGGTAGCATAGTTCGGTCCCTAATACTTTAGTCAATG	TGAGCGGAGTATCCTACGCATTAAAGAGAAACGCTTTTAAACTTTTAAAA	TTCAAAATGAAAAGTCAGGACCCTTTTCAAAAAGGATCGCAATTATACTA	AAACAAGCAGGCCTGGTAGCATAGTTCGGTCCCTAATACTTTAGTCAATGCGGATCCCCGGGTTAATTAA	TGAGCGGAGTATCCTACGCATTAAAGAGAAACGCTTTTAAACTTTTAAAACGGATCCCCGGGTTAATTAA	TTCAAAATGAAAAGTCAGGACCCTTTTCAAAAAGGATCGCAATTATACTAGAATTCGAGCTCGTTTAAAC	0		0		0
YDL141W	BPL1,ACC2	4	204715	206787	+	AGAAGATATTAGAACGATCTTATCAATATTATCCAATTTCAACTAATATG	GTAACACTTTTGATATCTTCAAGAGCTTAATTGCTAAAAAGGTTCAGAGT	CATTTAAATTACGTCCGTCCAACTTCTAAGCTTCAAGTGGTAGACTCTTA	AGAAGATATTAGAACGATCTTATCAATATTATCCAATTTCAACTAATATGCGGATCCCCGGGTTAATTAA	GTAACACTTTTGATATCTTCAAGAGCTTAATTGCTAAAAAGGTTCAGAGTCGGATCCCCGGGTTAATTAA	CATTTAAATTACGTCCGTCCAACTTCTAAGCTTCAAGTGGTAGACTCTTAGAATTCGAGCTCGTTTAAAC	0		0		0
YDL140C	RPO21,SUA8,RPB220,RPB1	4	207036	212236	-	AATCATAAAGATAGTAATAACACTTTACCCCAAAATATAAATCAGACATG	ATTCTCCAAAGCAAGACGAACAAAAGCATAATGAAAATGAAAATTCCAGA	CTATATATAATGTAATAACGTCAAATACGTAAGGATGATATACTATATCA	AATCATAAAGATAGTAATAACACTTTACCCCAAAATATAAATCAGACATGCGGATCCCCGGGTTAATTAA	ATTCTCCAAAGCAAGACGAACAAAAGCATAATGAAAATGAAAATTCCAGACGGATCCCCGGGTTAATTAA	CTATATATAATGTAATAACGTCAAATACGTAAGGATGATATACTATATCAGAATTCGAGCTCGTTTAAAC	0		0		0
YDL139C	SCM3	4	213052	213723	-	AAGTGGGATACAGCATATCGACGCCTCCACTACAAATTAACAGAAGGATG	CAGATTTCAAGAAGTACGAGGCCAAACTCTCGAAAAGGATATTACGAGAT	ATATATTCTGATGGTAATGAAATTCGAATATACGGCATTTTAACACCTTA	AAGTGGGATACAGCATATCGACGCCTCCACTACAAATTAACAGAAGGATGCGGATCCCCGGGTTAATTAA	CAGATTTCAAGAAGTACGAGGCCAAACTCTCGAAAAGGATATTACGAGATCGGATCCCCGGGTTAATTAA	ATATATTCTGATGGTAATGAAATTCGAATATACGGCATTTTAACACCTTAGAATTCGAGCTCGTTTAAAC	0		0		0
YDL138W	RGT2	4	215032	217323	+	CAGAAACCACTATATATATATATGGAAATATCTCGAATATTGCTTGTATG	ATTGGACGAGTGACCTCGCTAGTAAGCACAGCCAATACACTTCCCCCCAA	TAAAACGGTTTATAAGACCTCGAACGATCGTAAGATGCTATTGGTTTTTA	CAGAAACCACTATATATATATATGGAAATATCTCGAATATTGCTTGTATGCGGATCCCCGGGTTAATTAA	ATTGGACGAGTGACCTCGCTAGTAAGCACAGCCAATACACTTCCCCCCAACGGATCCCCGGGTTAATTAA	TAAAACGGTTTATAAGACCTCGAACGATCGTAAGATGCTATTGGTTTTTAGAATTCGAGCTCGTTTAAAC	0		0		0
YDL137W	ARF2	4	218194	218739	+	CAACCAATAGAGATAAAAAAAAGGAATTAAGATTTCATAGAGAAAAGATG	GTCTGTACGAAGGTCTGGAGTGGTTAAGCAACAACTTGAAGAATCAATCC	CAAAACACACAAGGTCCGCATGACTAAACGTTCTATACAGATTTAGATTA	CAACCAATAGAGATAAAAAAAAGGAATTAAGATTTCATAGAGAAAAGATGCGGATCCCCGGGTTAATTAA	GTCTGTACGAAGGTCTGGAGTGGTTAAGCAACAACTTGAAGAATCAATCCCGGATCCCCGGGTTAATTAA	CAAAACACACAAGGTCCGCATGACTAAACGTTCTATACAGATTTAGATTAGAATTCGAGCTCGTTTAAAC	0		0		0
YDL136W	RPL35B,SOS2	4	219262	220030	+	GGTTTGGTAGTACAGTGAACACGATAAAGAACCAAATAGGACTAAAAATG	AAAGAAAGAAGCAAATCGCTTTCCCACAAAGAAAGTACGCTATCAAGGCT	TTAAACTATATCCAAAAATCAAATATTAAAATGATAATCTAACGAAATTA	GGTTTGGTAGTACAGTGAACACGATAAAGAACCAAATAGGACTAAAAATGCGGATCCCCGGGTTAATTAA	AAAGAAAGAAGCAAATCGCTTTCCCACAAAGAAAGTACGCTATCAAGGCTCGGATCCCCGGGTTAATTAA	TTAAACTATATCCAAAAATCAAATATTAAAATGATAATCTAACGAAATTAGAATTCGAGCTCGTTTAAAC	0		0		0
YDL135C	RDI1	4	220343	220951	-	ACGAATAACTCGAGTATTGAGCTTTTTTATTACAGAAAAACTGAATAATG	ATAAAACTAACCACTTGACTTTAAATTGGGGGGTCGAAATTGTCAAAAAA	CTCTTGTTTATACAGGCCATATCTACATTGTGCATTCCAAGAACTTATTA	ACGAATAACTCGAGTATTGAGCTTTTTTATTACAGAAAAACTGAATAATGCGGATCCCCGGGTTAATTAA	ATAAAACTAACCACTTGACTTTAAATTGGGGGGTCGAAATTGTCAAAAAACGGATCCCCGGGTTAATTAA	CTCTTGTTTATACAGGCCATATCTACATTGTGCATTCCAAGAACTTATTAGAATTCGAGCTCGTTTAAAC	0		0		0
YDL134C	PPH21,PPH1	4	221325	222434	-	GAAAGAGGGATATAAATTATCGCATAAAACAATAAACAAAAAGAAAAATG	TAAGACCAGGTGAACCTAGCGTCAGCAGAAAGACGCCAGATTACTTTTTA	GAGAAAAGTGAATATATATCTATATAGATGCATATATGTATACATACTCA	GAAAGAGGGATATAAATTATCGCATAAAACAATAAACAAAAAGAAAAATGCGGATCCCCGGGTTAATTAA	TAAGACCAGGTGAACCTAGCGTCAGCAGAAAGACGCCAGATTACTTTTTACGGATCCCCGGGTTAATTAA	GAGAAAAGTGAATATATATCTATATAGATGCATATATGTATACATACTCAGAATTCGAGCTCGTTTAAAC	0		0		0
YDL133C-A	RPL41B,YDL134C-A,RPL47B	4	223387	223464	-	TTATATTTTACTTCAATCCTAAGATAGTCATATCGACTTAATTCCAAATG	GAACTAGAAGACTTAAGAGAAAGAGACGGAAGGTGAGAGCCAGATCCAAA	AATCAATTTTTACTTGACCTGAACTTAACGATTTGCTCTCAATCCGCTTA	TTATATTTTACTTCAATCCTAAGATAGTCATATCGACTTAATTCCAAATGCGGATCCCCGGGTTAATTAA	GAACTAGAAGACTTAAGAGAAAGAGACGGAAGGTGAGAGCCAGATCCAAACGGATCCCCGGGTTAATTAA	AATCAATTTTTACTTGACCTGAACTTAACGATTTGCTCTCAATCCGCTTAGAATTCGAGCTCGTTTAAAC	0		0		0
YDL133W	YDL133W	4	224090	225403	+	TTTTTGCATTTTTTGAGGCGTTCTTTTTTTTTACACTGACAAATTTAATG	TCAGTATTGTTAGAGTAGTCGAAAAAGTCAGTTCAATTACCAACAGAAAC	AATCTTGGTATCTAAAAGAATTCTTTTAATTTCTATATTTGTCGAGCTCA	TTTTTGCATTTTTTGAGGCGTTCTTTTTTTTTACACTGACAAATTTAATGCGGATCCCCGGGTTAATTAA	TCAGTATTGTTAGAGTAGTCGAAAAAGTCAGTTCAATTACCAACAGAAACCGGATCCCCGGGTTAATTAA	AATCTTGGTATCTAAAAGAATTCTTTTAATTTCTATATTTGTCGAGCTCAGAATTCGAGCTCGTTTAAAC	0		0		0
YDL132W	CDC53	4	225967	228414	+	ACATATACCTAAACAAAGAATAACAACAAAATCGCAAGCAGCAAAGCATG	AGGGATACCTACAGAGGGGAGACGATGGTGAATCGTATGCTTACCTTGCT	ACTCGTAGGATTTGCTTCGTTCGATCAGCACAAGCCTTCAAAGATGATTA	ACATATACCTAAACAAAGAATAACAACAAAATCGCAAGCAGCAAAGCATGCGGATCCCCGGGTTAATTAA	AGGGATACCTACAGAGGGGAGACGATGGTGAATCGTATGCTTACCTTGCTCGGATCCCCGGGTTAATTAA	ACTCGTAGGATTTGCTTCGTTCGATCAGCACAAGCCTTCAAAGATGATTAGAATTCGAGCTCGTTTAAAC	0		0		0
YDL131W	LYS21	4	229030	230352	+	TTTAAAAGTGCAACGACAACCCAAGTAATAGTATACTTTAACAAACCATG	ATATCGATATTTCCAATGGGCATGTTTCTAAAAAGGCAAAGGTCACCAAA	CCCAGTATGTGTATGTTTGAAATATGTGTACTATATATATAATGAAACTA	TTTAAAAGTGCAACGACAACCCAAGTAATAGTATACTTTAACAAACCATGCGGATCCCCGGGTTAATTAA	ATATCGATATTTCCAATGGGCATGTTTCTAAAAAGGCAAAGGTCACCAAACGGATCCCCGGGTTAATTAA	CCCAGTATGTGTATGTTTGAAATATGTGTACTATATATATAATGAAACTAGAATTCGAGCTCGTTTAAAC	0		0		0
YDL130W-A	STF1,AIS2	4	230808	231068	+	ATTAAGAAGCACTTTCACCCAGTCATCCAACCAAACACGCTATCAATATG	ACAAGAAAAAATTAGAGAATTTAGAAAACAAAATTAATAACCTTTCAAAG	TACGTACAAAATGTGTCTGCAGAACCTTTAGCCTTAACAATGACCAATCA	ATTAAGAAGCACTTTCACCCAGTCATCCAACCAAACACGCTATCAATATGCGGATCCCCGGGTTAATTAA	ACAAGAAAAAATTAGAGAATTTAGAAAACAAAATTAATAACCTTTCAAAGCGGATCCCCGGGTTAATTAA	TACGTACAAAATGTGTCTGCAGAACCTTTAGCCTTAACAATGACCAATCAGAATTCGAGCTCGTTTAAAC	0		0		0
YDL130W	RPP1B,RPLA3,RPL44'	4	231555	232176	+	TTCAGTTAAACTTGGACTAACAAAGAAATCAAACAACTAAGAAGAAAATG	AAGAAGCTGCTGAAGAATCTGACGACGACATGGGTTTCGGTTTATTCGAC	CATAAAGGGTAAAAAACGTTGCAGAAAAAATGACTTTCCTTGTATGTTTA	TTCAGTTAAACTTGGACTAACAAAGAAATCAAACAACTAAGAAGAAAATGCGGATCCCCGGGTTAATTAA	AAGAAGCTGCTGAAGAATCTGACGACGACATGGGTTTCGGTTTATTCGACCGGATCCCCGGGTTAATTAA	CATAAAGGGTAAAAAACGTTGCAGAAAAAATGACTTTCCTTGTATGTTTAGAATTCGAGCTCGTTTAAAC	0		0		0
YDL129W	YDL129W	4	232672	233547	+	AACGCGGGCAAGGCTACGGCATACAGGAATTTAACATTTTGTTGGCTATG	ATGTGAGAGTTTTTCATTTGGAGAAAAAAGAACCTAAATCACGAAAAAAA	TGAGAAAGAAAAATTATTGACGTTCAATAATATTTTTTTCTAGCATACTA	AACGCGGGCAAGGCTACGGCATACAGGAATTTAACATTTTGTTGGCTATGCGGATCCCCGGGTTAATTAA	ATGTGAGAGTTTTTCATTTGGAGAAAAAAGAACCTAAATCACGAAAAAAACGGATCCCCGGGTTAATTAA	TGAGAAAGAAAAATTATTGACGTTCAATAATATTTTTTTCTAGCATACTAGAATTCGAGCTCGTTTAAAC	0		0		0
YDL128W	VCX1,MNR1,HUM1	4	234299	235534	+	CATATCATTCATCGGCTGCTGATAGCAAATAAAACAACATAGATACAATG	TTTTCTATTATCCAGACGAAAAAACCCTTGACTCTATTGGAAATAGTTTA	AAATATAAAAAAAAGAGAAGGGTGAATTTCTGCGCTACTGTTCTTACTCA	CATATCATTCATCGGCTGCTGATAGCAAATAAAACAACATAGATACAATGCGGATCCCCGGGTTAATTAA	TTTTCTATTATCCAGACGAAAAAACCCTTGACTCTATTGGAAATAGTTTACGGATCCCCGGGTTAATTAA	AAATATAAAAAAAAGAGAAGGGTGAATTTCTGCGCTACTGTTCTTACTCAGAATTCGAGCTCGTTTAAAC	0		0		0
YDL127W	PCL2,CLN4	4	236573	237499	+	TCCGACAAGAGCAATTTCAATACGGCAGCAACTTTTTACTACAAAAGATG	AAGAAGATACAAAAGTAAAGAAATCGAATTGGTCAAATTACTTCAAATCG	AAGTGCCATGAAGAAACGCAGGCCAGGCATAATTTCGACATTTAAAATCA	TCCGACAAGAGCAATTTCAATACGGCAGCAACTTTTTACTACAAAAGATGCGGATCCCCGGGTTAATTAA	AAGAAGATACAAAAGTAAAGAAATCGAATTGGTCAAATTACTTCAAATCGCGGATCCCCGGGTTAATTAA	AAGTGCCATGAAGAAACGCAGGCCAGGCATAATTTCGACATTTAAAATCAGAATTCGAGCTCGTTTAAAC	0		0		0
YDL126C	CDC48	4	237802	240309	-	GCCATTGACTCGATAACTGGCTCAACTACAAGACAGATATACAAATCATG	CAGGTGCTGCATTTGGTTCTAATGCGGAGGAAGATGATGATTTGTATAGT	AATGACTTGAATTTACGATTTAAAATAAAAATATACCTGGCATATAACTA	GCCATTGACTCGATAACTGGCTCAACTACAAGACAGATATACAAATCATGCGGATCCCCGGGTTAATTAA	CAGGTGCTGCATTTGGTTCTAATGCGGAGGAAGATGATGATTTGTATAGTCGGATCCCCGGGTTAATTAA	AATGACTTGAATTTACGATTTAAAATAAAAATATACCTGGCATATAACTAGAATTCGAGCTCGTTTAAAC	0		0		0
YDL125C	HNT1	4	240664	241251	-	AAGTAAAAGGGCAATCAGCACGCCTTCCAGACTTTTAAGAAACATTGATG	AGTTGGGCAAGCTACACAAGGAATTGCTTGCCAAACTAGAAGGCTCCGAT	TTAAATATGAAAAGAAAACGCTAAAAGAAACCATAGCATGCATTACTCTA	AAGTAAAAGGGCAATCAGCACGCCTTCCAGACTTTTAAGAAACATTGATGCGGATCCCCGGGTTAATTAA	AGTTGGGCAAGCTACACAAGGAATTGCTTGCCAAACTAGAAGGCTCCGATCGGATCCCCGGGTTAATTAA	TTAAATATGAAAAGAAAACGCTAAAAGAAACCATAGCATGCATTACTCTAGAATTCGAGCTCGTTTAAAC	0		0		0
YDL124W	YDL124W	4	241894	242832	+	TTGTGTTACCCTAAAGAAACAGAGGTCAGTTAACAACACTTTTACAAATG	TGTATTGGAATAAATTGTACGATAAATACAACTACGCTGCTCAAAAAGTA	TAAAGTTATACAAAACAAATATGACTCGTACATAAATTGTCCGGTATTTA	TTGTGTTACCCTAAAGAAACAGAGGTCAGTTAACAACACTTTTACAAATGCGGATCCCCGGGTTAATTAA	TGTATTGGAATAAATTGTACGATAAATACAACTACGCTGCTCAAAAAGTACGGATCCCCGGGTTAATTAA	TAAAGTTATACAAAACAAATATGACTCGTACATAAATTGTCCGGTATTTAGAATTCGAGCTCGTTTAAAC	0		0		0
YDL123W	SNA4	4	243053	243475	+	CCCAATAAAGGTGCCACACTGAGCAGAGACAGATAAGGACGCGCATCATG	CCCATGACAACAAACAGTCTCTGGTTGAATCTCCTCCTCCTTATGTGCCA	TCGCTTGCTTGCTTGCTGGAATTTTCTTTTTCCTTGCTGTAGCTTCATCA	CCCAATAAAGGTGCCACACTGAGCAGAGACAGATAAGGACGCGCATCATGCGGATCCCCGGGTTAATTAA	CCCATGACAACAAACAGTCTCTGGTTGAATCTCCTCCTCCTTATGTGCCACGGATCCCCGGGTTAATTAA	TCGCTTGCTTGCTTGCTGGAATTTTCTTTTTCCTTGCTGTAGCTTCATCAGAATTCGAGCTCGTTTAAAC	0		0		0
YDL122W	UBP1	4	244186	246621	+	CTAGATACTTTCGAACACTTCTCCCCTTTTAATCTACAAAATTTTGTATG	AGTTCGAGAGAACAGAAGACCATAGAGATATTTCTGGTAAAGATGTAAAC	ATTATAGTTATTGTTATTTACACAATTACGGATATCGTATTTATAACTTA	CTAGATACTTTCGAACACTTCTCCCCTTTTAATCTACAAAATTTTGTATGCGGATCCCCGGGTTAATTAA	AGTTCGAGAGAACAGAAGACCATAGAGATATTTCTGGTAAAGATGTAAACCGGATCCCCGGGTTAATTAA	ATTATAGTTATTGTTATTTACACAATTACGGATATCGTATTTATAACTTAGAATTCGAGCTCGTTTAAAC	0		0		0
YDL121C	YDL121C	4	246773	247222	-	ACGAATTCCCTTAAAGTTCTCGGTGCCTAAGTCAATAAGTCCGGAGCATG	AGTTGAAGAAGTACAATGGTAAGAAAAATGAAGCTTACGAAGGATTTGTA	GAATGTCTAAAGTTTTTGTAGGACAATTGCAAAAATCACTTCCATTATTA	ACGAATTCCCTTAAAGTTCTCGGTGCCTAAGTCAATAAGTCCGGAGCATGCGGATCCCCGGGTTAATTAA	AGTTGAAGAAGTACAATGGTAAGAAAAATGAAGCTTACGAAGGATTTGTACGGATCCCCGGGTTAATTAA	GAATGTCTAAAGTTTTTGTAGGACAATTGCAAAAATCACTTCCATTATTAGAATTCGAGCTCGTTTAAAC	0		0		0
YDL120W	YFH1	4	247563	248087	+	AAAGATAGTATTTCAAAAAAAACTAAGCGAGAAGATAGAGTGTAGCAATG	TAACAGATATACTTACTGAAGAAGTTGAGAAGGCCATTTCTAAAAGCCAA	GTTACAAGTGTTTAAATAAATATAAGAGAGTCGATGGATAAGTGCACTTA	AAAGATAGTATTTCAAAAAAAACTAAGCGAGAAGATAGAGTGTAGCAATGCGGATCCCCGGGTTAATTAA	TAACAGATATACTTACTGAAGAAGTTGAGAAGGCCATTTCTAAAAGCCAACGGATCCCCGGGTTAATTAA	GTTACAAGTGTTTAAATAAATATAAGAGAGTCGATGGATAAGTGCACTTAGAATTCGAGCTCGTTTAAAC	0		0		0
YDL119C	YDL119C	4	248329	249252	-	GCACAGCGGGAACAACTAGAAGGTACACAATTTGTGAAGAAGCATACATG	GTGCAGGTATTGCGTGGGGTATATATGAGGAGTTGGTCAAAAGATTCATG	ACCTCTTTTGAAGAATGCGAGAGTGCAATGAAATATGTGTCTATTTTTTA	GCACAGCGGGAACAACTAGAAGGTACACAATTTGTGAAGAAGCATACATGCGGATCCCCGGGTTAATTAA	GTGCAGGTATTGCGTGGGGTATATATGAGGAGTTGGTCAAAAGATTCATGCGGATCCCCGGGTTAATTAA	ACCTCTTTTGAAGAATGCGAGAGTGCAATGAAATATGTGTCTATTTTTTAGAATTCGAGCTCGTTTAAAC	1	YDL118W	1	YDL118W	0
YDL118W	YDL118W	4	248942	249321	+	TTTCATACATCGTTAATCGTGGTAAGCTACTGCTCTTGTTATATACAATG	ATTGTGTACCTTCTAGTTGTTCCCGCTGTGCTATTTGCTTTCTTTTGGTA	TCCACATTAAATTCTCACGAGGGGGTGATTGAAGTAAAAGGATAAGCTTA	TTTCATACATCGTTAATCGTGGTAAGCTACTGCTCTTGTTATATACAATGCGGATCCCCGGGTTAATTAA	ATTGTGTACCTTCTAGTTGTTCCCGCTGTGCTATTTGCTTTCTTTTGGTACGGATCCCCGGGTTAATTAA	TCCACATTAAATTCTCACGAGGGGGTGATTGAAGTAAAAGGATAAGCTTAGAATTCGAGCTCGTTTAAAC	1	YDL119C	1	YDL119C	0
YDL117W	CYK3	4	250220	252877	+	ATACCATTTAATTCCTGAATTTACCGTATTACATTTAAATTTGCATAATG	TCGCTGACTCTGGTATTGGGTGGTCCGTTTTTGCTGAATGGTTGTGCGTA	GTTGAATGATACAGATTATAGCGCTGTAAAAAATTTGTGAAAAACGTTTA	ATACCATTTAATTCCTGAATTTACCGTATTACATTTAAATTTGCATAATGCGGATCCCCGGGTTAATTAA	TCGCTGACTCTGGTATTGGGTGGTCCGTTTTTGCTGAATGGTTGTGCGTACGGATCCCCGGGTTAATTAA	GTTGAATGATACAGATTATAGCGCTGTAAAAAATTTGTGAAAAACGTTTAGAATTCGAGCTCGTTTAAAC	0		0		0
YDL116W	NUP84	4	253204	255384	+	AAAACCAATTGAGTGTTACTTCGAAGTAAAATACATAGCCATTTCAAATG	AGCTAAAAGAGTATCTGGATCTCGTTGCTCGCACAGCAACCCTTTCGAAT	TTGCTGTTTACTTAAAATATAAACTTATTCTGCAATACATTAATTGATCA	AAAACCAATTGAGTGTTACTTCGAAGTAAAATACATAGCCATTTCAAATGCGGATCCCCGGGTTAATTAA	AGCTAAAAGAGTATCTGGATCTCGTTGCTCGCACAGCAACCCTTTCGAATCGGATCCCCGGGTTAATTAA	TTGCTGTTTACTTAAAATATAAACTTATTCTGCAATACATTAATTGATCAGAATTCGAGCTCGTTTAAAC	0		0		0
YDL115C	IWR1	4	255633	256764	-	TCTCTGAGGTATAGCTTTTGTTGAGGTAGGCATACAAGATTTCGGGAATG	ATCATAGGGACAGAATTTTTCATCAGCTACAGAAAAAAATTAATAGAAGC	TACAGATGCAGTTACTTACATACATTGAACAGTTTCTGACGGCAAATTTA	TCTCTGAGGTATAGCTTTTGTTGAGGTAGGCATACAAGATTTCGGGAATGCGGATCCCCGGGTTAATTAA	ATCATAGGGACAGAATTTTTCATCAGCTACAGAAAAAAATTAATAGAAGCCGGATCCCCGGGTTAATTAA	TACAGATGCAGTTACTTACATACATTGAACAGTTTCTGACGGCAAATTTAGAATTCGAGCTCGTTTAAAC	1	YDL114W-A	1	YDL114W-A	0
YDL114W-A	YDL114W-A	4	256573	256686	+	GCTCGGATTGATAGCTTTCAGAGCTCACAGTCTTTGATAATTTAAATATG	TAGTTAGTCAAACGCATTTTTGTTATATCGGTAGAATAACAACACATACA	AGTTTATCAGAGTAAAGAGAAGAAGGGATGAGGATTCTGTGCAGGCATTA	GCTCGGATTGATAGCTTTCAGAGCTCACAGTCTTTGATAATTTAAATATGCGGATCCCCGGGTTAATTAA	TAGTTAGTCAAACGCATTTTTGTTATATCGGTAGAATAACAACACATACACGGATCCCCGGGTTAATTAA	AGTTTATCAGAGTAAAGAGAAGAAGGGATGAGGATTCTGTGCAGGCATTAGAATTCGAGCTCGTTTAAAC	1	YDL115C	1	YDL115C	0
YDL114W	YDL114W	4	257241	258167	+	CAGTGACATATTTAACATAGTTTTATGGGTAAGAAATATTATTAATTATG	ACCATGTAACGTCAACCAGCCCGCGAGCAATAAATCCGAAAAGAAGTGCA	CAACGTGAAAATCAAATAACGTCAAATGTATTAAATAGACTAAAATACTA	CAGTGACATATTTAACATAGTTTTATGGGTAAGAAATATTATTAATTATGCGGATCCCCGGGTTAATTAA	ACCATGTAACGTCAACCAGCCCGCGAGCAATAAATCCGAAAAGAAGTGCACGGATCCCCGGGTTAATTAA	CAACGTGAAAATCAAATAACGTCAAATGTATTAAATAGACTAAAATACTAGAATTCGAGCTCGTTTAAAC	0		0		0
YDL113C	ATG20,CVT20,SNX42	4	258271	260193	-	GTGCAATTGAACATACCATCTAGAAAAGTTGTCTTCTACAGCACACAATG	GTCAAAATTTAGAAATTTGGAAAGAAGTCAAAAGACATCAAGATTTTGCA	ATATATATCAAGTATGCTATAACGCTAAAAAAAAAATGCTCATAATACTA	GTGCAATTGAACATACCATCTAGAAAAGTTGTCTTCTACAGCACACAATGCGGATCCCCGGGTTAATTAA	GTCAAAATTTAGAAATTTGGAAAGAAGTCAAAAGACATCAAGATTTTGCACGGATCCCCGGGTTAATTAA	ATATATATCAAGTATGCTATAACGCTAAAAAAAAAATGCTCATAATACTAGAATTCGAGCTCGTTTAAAC	0		0		0
YDL112W	TRM3	4	260553	264863	+	TTGTTTAACGAACGTTACAAACTCTATACCTTTTTTTTACCAGCAAAATG	TTCAAACGGCAACCGCAGTTATCGTTCATTCCTATACAGTTCAACACATG	ATACTAAAAACTTCATGGTTAACAAAAGTGGGAATGAAACCTGATTCTTA	TTGTTTAACGAACGTTACAAACTCTATACCTTTTTTTTACCAGCAAAATGCGGATCCCCGGGTTAATTAA	TTCAAACGGCAACCGCAGTTATCGTTCATTCCTATACAGTTCAACACATGCGGATCCCCGGGTTAATTAA	ATACTAAAAACTTCATGGTTAACAAAAGTGGGAATGAAACCTGATTCTTAGAATTCGAGCTCGTTTAAAC	0		0		0
YDL111C	RRP42	4	264951	265748	-	TTTGACTAGCACAACGACAGTTTGAGATTCTGTTGAAATAATCATTTATG	CAATGGTGGAGAAATACGCCCCCGACGTAGTACGATCACTGGAGAATTTA	TTAGTATGTAAACTAATTTGTCTTTTTATCTAATTGTGACTATATTTTTA	TTTGACTAGCACAACGACAGTTTGAGATTCTGTTGAAATAATCATTTATGCGGATCCCCGGGTTAATTAA	CAATGGTGGAGAAATACGCCCCCGACGTAGTACGATCACTGGAGAATTTACGGATCCCCGGGTTAATTAA	TTAGTATGTAAACTAATTTGTCTTTTTATCTAATTGTGACTATATTTTTAGAATTCGAGCTCGTTTAAAC	0		0		0
YDL110C	TMA17	4	266150	266602	-	TAAAACATAAAGCAAATCAAAACATAATAACTACTACAAGTAACATAATG	ACATGGACAATTCAAATGTGGACGTCGTGACACCAAACAGCATATTCATT	AAGAGTATGACGTGAAAATGATGCGCAGTAAAACTAAATCCCGTCTCTTA	TAAAACATAAAGCAAATCAAAACATAATAACTACTACAAGTAACATAATGCGGATCCCCGGGTTAATTAA	ACATGGACAATTCAAATGTGGACGTCGTGACACCAAACAGCATATTCATTCGGATCCCCGGGTTAATTAA	AAGAGTATGACGTGAAAATGATGCGCAGTAAAACTAAATCCCGTCTCTTAGAATTCGAGCTCGTTTAAAC	0		0		0
YDL109C	YDL109C	4	266896	268839	-	CTCACCTGACCTTATTCACCCAAAAACATCGGGGAAACGGTAGTAATATG	CTAGCCAGCTCGCCAGCTCCTGGATTAGCAAGCATTCCTCTGTGACAGAT	CAATAGTAAATTGCAAGTCAATCCCGGGATGACGTCAAGATAGACAGTCA	CTCACCTGACCTTATTCACCCAAAAACATCGGGGAAACGGTAGTAATATGCGGATCCCCGGGTTAATTAA	CTAGCCAGCTCGCCAGCTCCTGGATTAGCAAGCATTCCTCTGTGACAGATCGGATCCCCGGGTTAATTAA	CAATAGTAAATTGCAAGTCAATCCCGGGATGACGTCAAGATAGACAGTCAGAATTCGAGCTCGTTTAAAC	0		0		0
YDL108W	KIN28	4	269336	270337	+	TACTTAAAAGTCATCAAAAAAAATATTCCCGGCCTCAGAGCGAACATATG	TCAAAGAATTACCACCACCAAGTGACCCGTCTTCAATAAAAATACGTAAC	ACATCTAATGTCAATAACACAGATTCTACAAATTTTATAAAATCATATCA	TACTTAAAAGTCATCAAAAAAAATATTCCCGGCCTCAGAGCGAACATATGCGGATCCCCGGGTTAATTAA	TCAAAGAATTACCACCACCAAGTGACCCGTCTTCAATAAAAATACGTAACCGGATCCCCGGGTTAATTAA	ACATCTAATGTCAATAACACAGATTCTACAAATTTTATAAAATCATATCAGAATTCGAGCTCGTTTAAAC	0		0		0
YDL107W	MSS2	4	270559	271614	+	TAGCAGACGAAAACGAAAACAAAAGCAAGAAATATCTGATCTAAAATATG	TTCTTGAAAGTAGAAAAGATTCCATAAAGTTGCTGGACAAAGCACGGCTT	GGAGACATGTGTCCTTATATAAATCGCAAAAAGAATCGATCAGACATTTA	TAGCAGACGAAAACGAAAACAAAAGCAAGAAATATCTGATCTAAAATATGCGGATCCCCGGGTTAATTAA	TTCTTGAAAGTAGAAAAGATTCCATAAAGTTGCTGGACAAAGCACGGCTTCGGATCCCCGGGTTAATTAA	GGAGACATGTGTCCTTATATAAATCGCAAAAAGAATCGATCAGACATTTAGAATTCGAGCTCGTTTAAAC	0		0		0
YDL106C	PHO2,GRF10,BAS2	4	271860	273536	-	GGCTAGACAAGTCACGGCTTACTGCTAAATAACGTATACAATACGCTATG	CAGATTTTTTGAAGAACACTAACGAACTAACTGACGAGCATAGATGGATA	AGAGTTGAAAATGCAATCGCAAAAAAAAAAAAACAGAATTATTTTCATCA	GGCTAGACAAGTCACGGCTTACTGCTAAATAACGTATACAATACGCTATGCGGATCCCCGGGTTAATTAA	CAGATTTTTTGAAGAACACTAACGAACTAACTGACGAGCATAGATGGATACGGATCCCCGGGTTAATTAA	AGAGTTGAAAATGCAATCGCAAAAAAAAAAAAACAGAATTATTTTCATCAGAATTCGAGCTCGTTTAAAC	0		0		0
YDL105W	NSE4,QRI2	4	274024	275232	+	ATCAAGAAATCAGAGTTTTGCAAAAAAAAGAGAGTACAGACAGCGACATG	CTTGGCGAAAACTAATAAAGAAATACAACATCACTTCACCATTCTTAGAC	AAAAAAAAAAAAAAACTGTACATATTATATGCAGCGCTCTATCGCTGTTA	ATCAAGAAATCAGAGTTTTGCAAAAAAAAGAGAGTACAGACAGCGACATGCGGATCCCCGGGTTAATTAA	CTTGGCGAAAACTAATAAAGAAATACAACATCACTTCACCATTCTTAGACCGGATCCCCGGGTTAATTAA	AAAAAAAAAAAAAAACTGTACATATTATATGCAGCGCTCTATCGCTGTTAGAATTCGAGCTCGTTTAAAC	0		0		0
YDL104C	QRI7	4	275288	276515	-	CTGAAATAAGTAGAGTAGAAGAAAGGATAGAAACTTTTTTTTTCATTATG	ATTGAATGACCTATTAAGTGTTGATGGTTGGAGAACGGACCAGCTATGAA	GAGCGCTGCATATAATATGTACAGTTTTTTTTTTTTTTTTTTTTTTTTTT	CTGAAATAAGTAGAGTAGAAGAAAGGATAGAAACTTTTTTTTTCATTATGCGGATCCCCGGGTTAATTAA	ATTGAATGACCTATTAAGTGTTGATGGTTGGAGAACGGACCAGCTATGAACGGATCCCCGGGTTAATTAA	GAGCGCTGCATATAATATGTACAGTTTTTTTTTTTTTTTTTTTTTTTTTTGAATTCGAGCTCGTTTAAAC	0		0		0
YDL103C	QRI1,UAP1	4	276787	278220	-	GCAAAGAAACGCAAATATAAAGGAGAACGCCAGATCGAACTGCAACTATG	CCCAGTTCAAAGGTAAAGTCTTTGACAGAAGTGGTATAGTATTAGAAAAA	ACTTTTCAAATTACATGCTAAAAGTGCTTCATAAGTAGCTCAAACAGTTA	GCAAAGAAACGCAAATATAAAGGAGAACGCCAGATCGAACTGCAACTATGCGGATCCCCGGGTTAATTAA	CCCAGTTCAAAGGTAAAGTCTTTGACAGAAGTGGTATAGTATTAGAAAAACGGATCCCCGGGTTAATTAA	ACTTTTCAAATTACATGCTAAAAGTGCTTCATAAGTAGCTCAAACAGTTAGAATTCGAGCTCGTTTAAAC	0		0		0
YDL102W	POL3,CDC2,TEX1,HPR6	4	278511	281804	+	TGAGCACTTGCTATTAAGCATTAATCTTTATACATATACGCACAGCAATG	TTAAGGTTAAAAAAGAGCTGCAGGAGAAAGTAGAACAATTAAGCAAATGG	TTGTTAGCCTTTCTTAATCCTGATATGATGTGCCACCCTATCGTTTTTTA	TGAGCACTTGCTATTAAGCATTAATCTTTATACATATACGCACAGCAATGCGGATCCCCGGGTTAATTAA	TTAAGGTTAAAAAAGAGCTGCAGGAGAAAGTAGAACAATTAAGCAAATGGCGGATCCCCGGGTTAATTAA	TTGTTAGCCTTTCTTAATCCTGATATGATGTGCCACCCTATCGTTTTTTAGAATTCGAGCTCGTTTAAAC	0		0		0
YDL101C	DUN1	4	281946	283487	-	CAAGTAAAGGGGCTTAACATACAGTAAAAAAGGCAATTATAGCGAAGATG	AAATTACTGACAATAAAATACCCAAAACATACTCAGAATTATCTTGCCTC	GAAAAATCCAGATTCAAACAATGTTTTTGAAATAATGCTTCTCATGTTTA	CAAGTAAAGGGGCTTAACATACAGTAAAAAAGGCAATTATAGCGAAGATGCGGATCCCCGGGTTAATTAA	AAATTACTGACAATAAAATACCCAAAACATACTCAGAATTATCTTGCCTCCGGATCCCCGGGTTAATTAA	GAAAAATCCAGATTCAAACAATGTTTTTGAAATAATGCTTCTCATGTTTAGAATTCGAGCTCGTTTAAAC	0		0		0
YDL100C	GET3,ARR4	4	283751	284815	-	TTTAGAAAAACGTACGACAAGAACAAGAAGATCATCACATTGTAATTATG	ATAACCCTATTACTGATGGCAAAGTCATTTATGAGTTAGAAGATAAGGAA	TCTATGGTTATATGTCGTATGTATCTATTTATGGTATTCAGGGGCTTCTA	TTTAGAAAAACGTACGACAAGAACAAGAAGATCATCACATTGTAATTATGCGGATCCCCGGGTTAATTAA	ATAACCCTATTACTGATGGCAAAGTCATTTATGAGTTAGAAGATAAGGAACGGATCCCCGGGTTAATTAA	TCTATGGTTATATGTCGTATGTATCTATTTATGGTATTCAGGGGCTTCTAGAATTCGAGCTCGTTTAAAC	0		0		0
YDL099W	BUG1	4	285058	286083	+	TTTGCATTGAACCAACCTGAATTGAGCAAGTTTATCATATAGTTACAATG	TAGACATGACCACTTGGAGAAGTATTGGTTCTGGCCCAATAATGGAATTT	ATGTATATAAACCCTTAATTAAAATATATACGCGAAAATATTCATTCTCA	TTTGCATTGAACCAACCTGAATTGAGCAAGTTTATCATATAGTTACAATGCGGATCCCCGGGTTAATTAA	TAGACATGACCACTTGGAGAAGTATTGGTTCTGGCCCAATAATGGAATTTCGGATCCCCGGGTTAATTAA	ATGTATATAAACCCTTAATTAAAATATATACGCGAAAATATTCATTCTCAGAATTCGAGCTCGTTTAAAC	0		0		0
YDL098C	SNU23	4	286220	286804	-	ACCAGAAGTTCCTACAAGCCTTAGCTGACAAAAATTCGAGAAAGCTAATG	CAAAAGTCAGTCAAATGATGGGATTTTCCAATTTTGCCACCTCTAAAAAA	TATGTGCTCTATGCTTGTATTATACTCATTTATCTTTACTTGGTTTCTCA	ACCAGAAGTTCCTACAAGCCTTAGCTGACAAAAATTCGAGAAAGCTAATGCGGATCCCCGGGTTAATTAA	CAAAAGTCAGTCAAATGATGGGATTTTCCAATTTTGCCACCTCTAAAAAACGGATCCCCGGGTTAATTAA	TATGTGCTCTATGCTTGTATTATACTCATTTATCTTTACTTGGTTTCTCAGAATTCGAGCTCGTTTAAAC	0		0		0
YDL097C	RPN6,NAS4	4	287032	288336	-	GCGCTGAAAGAGGACAATTGGTGATTAATCTATAAACGAGGAACTTCATG	AACTAAATAAAGTCGTCGATCAACTATTTGAAAAGGCAAGTGTCTTGTAT	TACTCTGGTACTTGTGAGTATACATACATATATATATACATGTAAACCTA	GCGCTGAAAGAGGACAATTGGTGATTAATCTATAAACGAGGAACTTCATGCGGATCCCCGGGTTAATTAA	AACTAAATAAAGTCGTCGATCAACTATTTGAAAAGGCAAGTGTCTTGTATCGGATCCCCGGGTTAATTAA	TACTCTGGTACTTGTGAGTATACATACATATATATATACATGTAAACCTAGAATTCGAGCTCGTTTAAAC	0		0		0
YDL096C	OPI6	4	288639	288965	-	ACATCTTTGCAAGAGGAGGATGCACATCCATGAAGTAAGTCCCCCTAATG	TTGTAGCTGTTAGCTGTTTCTTGATAGGCTCTTCTGATACTACCTCGCTT	GATCTTGATTATTTTCGAGCAGCAAAACAAGACAAACAGGTGCATTGTTA	ACATCTTTGCAAGAGGAGGATGCACATCCATGAAGTAAGTCCCCCTAATGCGGATCCCCGGGTTAATTAA	TTGTAGCTGTTAGCTGTTTCTTGATAGGCTCTTCTGATACTACCTCGCTTCGGATCCCCGGGTTAATTAA	GATCTTGATTATTTTCGAGCAGCAAAACAAGACAAACAGGTGCATTGTTAGAATTCGAGCTCGTTTAAAC	1	YDL095W	1	YDL095W	0
YDL095W	PMT1	4	288700	291153	+	TATCAGAAGAGCCTATCAAGAAACAGCTAACAGCTACAAGCACGGTCATG	AAGAGGAGGGAGCTAGCATTTTAAAAGTAGAAAAAAGGGCTGTTTTGGAA	GAGCTTATAGAAGACTTTACATAAAAATGTGGAGAGTACTGGGAAATTTA	TATCAGAAGAGCCTATCAAGAAACAGCTAACAGCTACAAGCACGGTCATGCGGATCCCCGGGTTAATTAA	AAGAGGAGGGAGCTAGCATTTTAAAAGTAGAAAAAAGGGCTGTTTTGGAACGGATCCCCGGGTTAATTAA	GAGCTTATAGAAGACTTTACATAAAAATGTGGAGAGTACTGGGAAATTTAGAATTCGAGCTCGTTTAAAC	1	YDL096C	1	YDL096C	0
YDL094C	YDL094C	4	291213	291722	-	CACCAAAAACAACACTATTTGGCAGGGAGATATTGTGTAGCCTTACGATA	TTCAAGACATTTTTTTTATTCATGATGTTTTTTTTGTCTATTTTCGTTTT	TCTCCACATTTTTATGTAAAGTCTTCTATAAGCTCTCGAGCGTATAATTA	CACCAAAAACAACACTATTTGGCAGGGAGATATTGTGTAGCCTTACGATGCGGATCCCCGGGTTAATTAA	TTCAAGACATTTTTTTTATTCATGATGTTTTTTTTGTCTATTTTCGTTTTCGGATCCCCGGGTTAATTAA	TCTCCACATTTTTATGTAAAGTCTTCTATAAGCTCTCGAGCGTATAATTAGAATTCGAGCTCGTTTAAAC	1	YDL093W	1	YDL093W	0
YDL093W	PMT5	4	291550	293781	+	TTGATTTAACAATTAAGCAGGTGTGTAAGATCATAACTGCTTTAAAGATG	GCAATTCACTATTACTATCCGATAGCCACTATGAATTAAACGCTGAATCA	TAAATCTTTTGCTAAACGAATGTCCAATCTGAATACGGGTGGATGGATTA	TTGATTTAACAATTAAGCAGGTGTGTAAGATCATAACTGCTTTAAAGATGCGGATCCCCGGGTTAATTAA	GCAATTCACTATTACTATCCGATAGCCACTATGAATTAAACGCTGAATCACGGATCCCCGGGTTAATTAA	TAAATCTTTTGCTAAACGAATGTCCAATCTGAATACGGGTGGATGGATTAGAATTCGAGCTCGTTTAAAC	1	YDL094C	1	YDL094C	0
YDL092W	SRP14	4	294421	294861	+	TCTTTAATACAAATCAAGAAACGTAGCTTTCTTACCACCCTAGAACAATG	ACGGTACCATCAGTAAGACAGGTAAGAAAAACAAGGTAGCGAAGAAAAAC	AAGATAACAAGAGGCGCACATGCCTTTTGACTCAAGTGTCACGTGCATCA	TCTTTAATACAAATCAAGAAACGTAGCTTTCTTACCACCCTAGAACAATGCGGATCCCCGGGTTAATTAA	ACGGTACCATCAGTAAGACAGGTAAGAAAAACAAGGTAGCGAAGAAAAACCGGATCCCCGGGTTAATTAA	AAGATAACAAGAGGCGCACATGCCTTTTGACTCAAGTGTCACGTGCATCAGAATTCGAGCTCGTTTAAAC	0		0		0
YDL091C	UBX3	4	295032	296399	-	GTACCTCATCAATCGGCTTGACTGCGATTTAAACATACCCTTTAAACATG	TTAGCGGCATATATCCATCAGGAAATATTGTAATGGAACGCCTGGACGAA	TAAACTTTAGAATAAACGTTTTGAGATGACTATTTTTGAAATTCCTTTCA	GTACCTCATCAATCGGCTTGACTGCGATTTAAACATACCCTTTAAACATGCGGATCCCCGGGTTAATTAA	TTAGCGGCATATATCCATCAGGAAATATTGTAATGGAACGCCTGGACGAACGGATCCCCGGGTTAATTAA	TAAACTTTAGAATAAACGTTTTGAGATGACTATTTTTGAAATTCCTTTCAGAATTCGAGCTCGTTTAAAC	0		0		0
YDL090C	RAM1,STE16,SGP2,SCG2,FUS8,DPR1	4	296674	297969	-	TGCAGAAACAACTGCAGTGCTTGTAAAGCTATAGGCAGTCAAAGCGTATG	ATGTAAGAAAAATTATCCACTACTTTAAATCCAATTTATCTTCTCCAAGT	AGACTGACCGCTAAGGAGATTGAATACATATATATAATAGTATGTGGTTA	TGCAGAAACAACTGCAGTGCTTGTAAAGCTATAGGCAGTCAAAGCGTATGCGGATCCCCGGGTTAATTAA	ATGTAAGAAAAATTATCCACTACTTTAAATCCAATTTATCTTCTCCAAGTCGGATCCCCGGGTTAATTAA	AGACTGACCGCTAAGGAGATTGAATACATATATATAATAGTATGTGGTTAGAATTCGAGCTCGTTTAAAC	0		0		0
YDL089W	YDL089W	4	298460	299914	+	AACTTTGTTGTGCAGTAGAGGGCTTTACATTTACCTTCGGCAGTGAAATG	TTAATTCCATTCTTCGCTCTCCAAAGAAAAAGAAGAACTATCACAAAAGA	TATTGATTTTTACGTAACTGTATATACTTAGACATAATTAAGAAACGTTA	AACTTTGTTGTGCAGTAGAGGGCTTTACATTTACCTTCGGCAGTGAAATGCGGATCCCCGGGTTAATTAA	TTAATTCCATTCTTCGCTCTCCAAAGAAAAAGAAGAACTATCACAAAAGACGGATCCCCGGGTTAATTAA	TATTGATTTTTACGTAACTGTATATACTTAGACATAATTAAGAAACGTTAGAATTCGAGCTCGTTTAAAC	0		0		0
YDL088C	ASM4,NUP59	4	300057	301643	-	TTTTTTTTTTTTCTCTGTAACCTGAAAACAAGGAACGGCAAATTAAAATG	CTGGTTTTACGCACAAACTGAGTAATTGGTTATTTGGTTGGAATGACCTA	TATGAAGTATTGTAAATGTTCATGAATAATTAGCTGGACGATTTCTATTA	TTTTTTTTTTTTCTCTGTAACCTGAAAACAAGGAACGGCAAATTAAAATGCGGATCCCCGGGTTAATTAA	CTGGTTTTACGCACAAACTGAGTAATTGGTTATTTGGTTGGAATGACCTACGGATCCCCGGGTTAATTAA	TATGAAGTATTGTAAATGTTCATGAATAATTAGCTGGACGATTTCTATTAGAATTCGAGCTCGTTTAAAC	0		0		0
YDL087C	LUC7,EPE1,EXM2	4	301854	302639	-	ACAAAAGGCTCTATACTCCCAGCAGAAAGCTGCCAACTACCGTCAGAATG	CAACTAACGCCAGCAAGACAGCTACTACACTACCCGGAAGACGCTTTGTG	TCTCCTTCGAACAAAATTTTTCTAGCATCATTTTTTTTTGTATGGCCCTA	ACAAAAGGCTCTATACTCCCAGCAGAAAGCTGCCAACTACCGTCAGAATGCGGATCCCCGGGTTAATTAA	CAACTAACGCCAGCAAGACAGCTACTACACTACCCGGAAGACGCTTTGTGCGGATCCCCGGGTTAATTAA	TCTCCTTCGAACAAAATTTTTCTAGCATCATTTTTTTTTGTATGGCCCTAGAATTCGAGCTCGTTTAAAC	0		0		0
YDL086W	YDL086W	4	303053	303874	+	CTGAAAATGTCGCCGTAATAAACTCGTGGTAGTAGATAAAGCAAACAATG	TCGATTTGGGTGAATTTGTCGATGACAATACACCTTTGGAGCACGTTTGT	CTTTTTCTTATTGTTATTTAGTATATAGCGTATACAGAGTGAAGATCTTA	CTGAAAATGTCGCCGTAATAAACTCGTGGTAGTAGATAAAGCAAACAATGCGGATCCCCGGGTTAATTAA	TCGATTTGGGTGAATTTGTCGATGACAATACACCTTTGGAGCACGTTTGTCGGATCCCCGGGTTAATTAA	CTTTTTCTTATTGTTATTTAGTATATAGCGTATACAGAGTGAAGATCTTAGAATTCGAGCTCGTTTAAAC	1	YDL086C-A	1	YDL086C-A	0
YDL086C-A	YDL086C-A	4	303295	303729	-	TTTGAGTGATAGCGGAGTCGAACCTGCCCTTGCTGAACTCGTCACGGATG	ACGGCTTCTTGATCTTGTACTCGTTACCAATATCGGTACCCTGCACGTCA	GTGGCACCTGCCATATACCACAACTTTATGGGCCCTGAAGCGTTGCCCTA	TTTGAGTGATAGCGGAGTCGAACCTGCCCTTGCTGAACTCGTCACGGATGCGGATCCCCGGGTTAATTAA	ACGGCTTCTTGATCTTGTACTCGTTACCAATATCGGTACCCTGCACGTCACGGATCCCCGGGTTAATTAA	GTGGCACCTGCCATATACCACAACTTTATGGGCCCTGAAGCGTTGCCCTAGAATTCGAGCTCGTTTAAAC	1	YDL086W	1	YDL086W	0
YDL085C-A	YDL085C-A	4	304102	304308	-	ACTACACAGAGCAACAAATTACGTCGCAAGACGATACATCTTTAACAATG	GAAGAGAGGCTGAAAAGCTTGAGAAGTTAAAAGCCGAAAAGACGAGAAGA	TACTGGCACTATTCATTCCAATAAAAGGACAGGTATAAAGTGTCTGCTTA	ACTACACAGAGCAACAAATTACGTCGCAAGACGATACATCTTTAACAATGCGGATCCCCGGGTTAATTAA	GAAGAGAGGCTGAAAAGCTTGAGAAGTTAAAAGCCGAAAAGACGAGAAGACGGATCCCCGGGTTAATTAA	TACTGGCACTATTCATTCCAATAAAAGGACAGGTATAAAGTGTCTGCTTAGAATTCGAGCTCGTTTAAAC	0		0		0
YDL085W	NDE2,NDH2	4	304850	306487	+	ACATAGTAGAAAGACAAAAACAACCACCGTACTTGCCATTCGTATAGATG	TTGCCATGGACTGGACCAAAGTTTACTTTCTTGGAAGGGATTCCTCCGTG	TGATAGTAAACAATTTGAATTGGAACAATGAATATATAAAACAAGGACTA	ACATAGTAGAAAGACAAAAACAACCACCGTACTTGCCATTCGTATAGATGCGGATCCCCGGGTTAATTAA	TTGCCATGGACTGGACCAAAGTTTACTTTCTTGGAAGGGATTCCTCCGTGCGGATCCCCGGGTTAATTAA	TGATAGTAAACAATTTGAATTGGAACAATGAATATATAAAACAAGGACTAGAATTCGAGCTCGTTTAAAC	0		0		0
YDL084W	SUB2	4	306876	308216	+	GGCAATAGGTTAAAAAAAGCTCGTTCATTTTTTTAAAAACAGCAACGATG	TCGCTGAATTCCCAGAAGAAGGCATTGATCCGTCCACTTATTTGAATAAT	ACAAAATCTTTATATAATCTATATAAAAACGTATCTTTTTTCCTTTATTA	GGCAATAGGTTAAAAAAAGCTCGTTCATTTTTTTAAAAACAGCAACGATGCGGATCCCCGGGTTAATTAA	TCGCTGAATTCCCAGAAGAAGGCATTGATCCGTCCACTTATTTGAATAATCGGATCCCCGGGTTAATTAA	ACAAAATCTTTATATAATCTATATAAAAACGTATCTTTTTTCCTTTATTAGAATTCGAGCTCGTTTAAAC	0		0		0
YDL083C	RPS16B	4	308565	309428	-	TTATTTAGCAGTGTTTCGAAAAATACAGCAAGAGAATAAGCAACAAGATG	AGAAATTCGGTGGTAAGGGTGCTCGTTCTAGATTCCAAAAATCTTACCGT	GTGCAAAGAAAAGTAAAGAGATTTCTGGAAAAAATCTTGAAATTTTCTTA	TTATTTAGCAGTGTTTCGAAAAATACAGCAAGAGAATAAGCAACAAGATGCGGATCCCCGGGTTAATTAA	AGAAATTCGGTGGTAAGGGTGCTCGTTCTAGATTCCAAAAATCTTACCGTCGGATCCCCGGGTTAATTAA	GTGCAAAGAAAAGTAAAGAGATTTCTGGAAAAAATCTTGAAATTTTCTTAGAATTCGAGCTCGTTTAAAC	0		0		0
YDL082W	RPL13A	4	310063	311027	+	AAGGGGTTTGAGAAAAGCATAGTACAGCACAGCAGGAATCGTACACAATG	GAGAAAAGAGAGCTAGAGAAAAGGCTGAAGCTGAAGCTGAAAAGAAGAAA	AAATACAAAAATTGTGGATGAAAAATTCTTTGATGAAGTTTTTAGATCTA	AAGGGGTTTGAGAAAAGCATAGTACAGCACAGCAGGAATCGTACACAATGCGGATCCCCGGGTTAATTAA	GAGAAAAGAGAGCTAGAGAAAAGGCTGAAGCTGAAGCTGAAAAGAAGAAACGGATCCCCGGGTTAATTAA	AAATACAAAAATTGTGGATGAAAAATTCTTTGATGAAGTTTTTAGATCTAGAATTCGAGCTCGTTTAAAC	0		0		0
YDL081C	RPP1A,RPLA1	4	311441	311761	-	TCCAATACAACAGCTTAAACCGATTATCTCTAAAATAACAAGAAGAAATG	AAGAAGCTAAAGAAGAATCCGATGACGACATGGGTTTCGGTTTATTTGAT	ATTTTAAATGTTAGAATATGCAATTTCTTCTAAACAGTGCGGCACTTCTA	TCCAATACAACAGCTTAAACCGATTATCTCTAAAATAACAAGAAGAAATGCGGATCCCCGGGTTAATTAA	AAGAAGCTAAAGAAGAATCCGATGACGACATGGGTTTCGGTTTATTTGATCGGATCCCCGGGTTAATTAA	ATTTTAAATGTTAGAATATGCAATTTCTTCTAAACAGTGCGGCACTTCTAGAATTCGAGCTCGTTTAAAC	0		0		0
YDL080C	THI3,KID1	4	312284	314112	-	GGTTTGAAAGAACATAACTACTAAAACGCACCGTCGTCATTCTGAAGATG	ACGCCAACTCCAGAATTCCAACCACTTCTAAAAAAAATCAAGTTGGATAC	CGAGCGGTAATCATGAGGGTCCCTGGTAGTAGGGCGGAGAGATCAGATCA	GGTTTGAAAGAACATAACTACTAAAACGCACCGTCGTCATTCTGAAGATGCGGATCCCCGGGTTAATTAA	ACGCCAACTCCAGAATTCCAACCACTTCTAAAAAAAATCAAGTTGGATACCGGATCCCCGGGTTAATTAA	CGAGCGGTAATCATGAGGGTCCCTGGTAGTAGGGCGGAGAGATCAGATCAGAATTCGAGCTCGTTTAAAC	0		0		0
YDL079C	MRK1	4	314593	316385	-	AAAATAATCTCAAGATTGAAGAGGTGAAAATTGTAAAATAGTCTACTATG	CCATTGAAGAACGGTTGAAACATTTTGTTTCTGCACCTTCATCGTCTTTG	TAATAGTAATGATACAATAGACTAAGAAATTTGAAGGATGAGATATATCA	AAAATAATCTCAAGATTGAAGAGGTGAAAATTGTAAAATAGTCTACTATGCGGATCCCCGGGTTAATTAA	CCATTGAAGAACGGTTGAAACATTTTGTTTCTGCACCTTCATCGTCTTTGCGGATCCCCGGGTTAATTAA	TAATAGTAATGATACAATAGACTAAGAAATTTGAAGGATGAGATATATCAGAATTCGAGCTCGTTTAAAC	0		0		0
YDL078C	MDH3	4	316978	318009	-	CACTTGTCAGTGCAAAAGAAAATAAAAAGAGACAAACAATCATAAACATG	GCAAGAATATTGAAAAAGGCAAGAGTTTCATCCTAGACTCTTCCAAGCTA	GATACAAAGGAGTATAGAGTTAAGAAAAATATAAAAATTGAAGTAGCTCA	CACTTGTCAGTGCAAAAGAAAATAAAAAGAGACAAACAATCATAAACATGCGGATCCCCGGGTTAATTAA	GCAAGAATATTGAAAAAGGCAAGAGTTTCATCCTAGACTCTTCCAAGCTACGGATCCCCGGGTTAATTAA	GATACAAAGGAGTATAGAGTTAAGAAAAATATAAAAATTGAAGTAGCTCAGAATTCGAGCTCGTTTAAAC	0		0		0
YDL077C	VAM6,VPS39,VPL22,VPL18,CVT4	4	318594	321743	-	TTGATCAGCAAAAACCCTTCAAAATATCAATTTATACCAAAAATTAAATG	GAATTAAACAGAAGACTTTGGGAGAAGTTATAAATGAGCTAAATAATAAG	TATATATAAGAAATACTAACAACAATAACAGCAGCTGTTAAGGGATCTTA	TTGATCAGCAAAAACCCTTCAAAATATCAATTTATACCAAAAATTAAATGCGGATCCCCGGGTTAATTAA	GAATTAAACAGAAGACTTTGGGAGAAGTTATAAATGAGCTAAATAATAAGCGGATCCCCGGGTTAATTAA	TATATATAAGAAATACTAACAACAATAACAGCAGCTGTTAAGGGATCTTAGAATTCGAGCTCGTTTAAAC	0		0		0
YDL076C	RXT3	4	322291	323175	-	CTCGCAGTTTTTTTTTGAGAGAAGTAACAATACAATATAAGATAAAAATG	GAGATAAACCTCATGAACCAAACGGGTATATTAAAAATTTAAAATGGACC	AACTAAGGTTGGAAGGGAAAGAAGGACGACCAATATTATGTCTTTCCTTA	CTCGCAGTTTTTTTTTGAGAGAAGTAACAATACAATATAAGATAAAAATGCGGATCCCCGGGTTAATTAA	GAGATAAACCTCATGAACCAAACGGGTATATTAAAAATTTAAAATGGACCCGGATCCCCGGGTTAATTAA	AACTAAGGTTGGAAGGGAAAGAAGGACGACCAATATTATGTCTTTCCTTAGAATTCGAGCTCGTTTAAAC	0		0		0
YDL075W	RPL31A,RPL34	4	323851	324613	+	TTTTAAAGAAAGAATTAATAAGCAAACAGAACTCAATCAAAGGAAAAATG	TAGTTGCTTCTGCCAAGGGTCTACAAACTGTTGTTGTCGAAGAAGATGCT	CTTTATATTTATTAATATAAAATGAGTATTATTTTTATTTAATTGATTTA	TTTTAAAGAAAGAATTAATAAGCAAACAGAACTCAATCAAAGGAAAAATGCGGATCCCCGGGTTAATTAA	TAGTTGCTTCTGCCAAGGGTCTACAAACTGTTGTTGTCGAAGAAGATGCTCGGATCCCCGGGTTAATTAA	CTTTATATTTATTAATATAAAATGAGTATTATTTTTATTTAATTGATTTAGAATTCGAGCTCGTTTAAAC	0		0		0
YDL074C	BRE1	4	325660	327762	-	GCTTTCACCGTTTTTATGCTAATCGTGCTAGCTGATAATAATCAGATATG	CTACATGCAACAAAGCATTCAGTTCCAATGATTTATTGACAGTGCACTTG	ATGGAGGATATAACACAAACAGTGGAAAAGTGGTAGAATAATTAGTATTA	GCTTTCACCGTTTTTATGCTAATCGTGCTAGCTGATAATAATCAGATATGCGGATCCCCGGGTTAATTAA	CTACATGCAACAAAGCATTCAGTTCCAATGATTTATTGACAGTGCACTTGCGGATCCCCGGGTTAATTAA	ATGGAGGATATAACACAAACAGTGGAAAAGTGGTAGAATAATTAGTATTAGAATTCGAGCTCGTTTAAAC	0		0		0
YDL073W	YDL073W	4	328225	331179	+	CTATATACGCATTGTTGTAGCACTAAAGATCATATTGCTCATTAAGCATG	ATTTTGAAGTGAGGAAACCTAGTAGTAATAATTCTATTAATATCAAAGTC	TAATAATAATAATACTACACGTTTACGTATGTAACTCATTCTATTATTCA	CTATATACGCATTGTTGTAGCACTAAAGATCATATTGCTCATTAAGCATGCGGATCCCCGGGTTAATTAA	ATTTTGAAGTGAGGAAACCTAGTAGTAATAATTCTATTAATATCAAAGTCCGGATCCCCGGGTTAATTAA	TAATAATAATAATACTACACGTTTACGTATGTAACTCATTCTATTATTCAGAATTCGAGCTCGTTTAAAC	0		0		0
YDL072C	YET3	4	331452	332063	-	ACCACGTCACATTATACTCATAACCATAGAATTCACAGAATTGAATCATG	AAATTGCACGTTTAAAGGAGAAGTCGGAATCGTTGCAAGAAGAAATGAAT	ATATATATACACACTTCTGTGCAGAAGAAAAGGAATAAAACGTCAAACTA	ACCACGTCACATTATACTCATAACCATAGAATTCACAGAATTGAATCATGCGGATCCCCGGGTTAATTAA	AAATTGCACGTTTAAAGGAGAAGTCGGAATCGTTGCAAGAAGAAATGAATCGGATCCCCGGGTTAATTAA	ATATATATACACACTTCTGTGCAGAAGAAAAGGAATAAAACGTCAAACTAGAATTCGAGCTCGTTTAAAC	0		0		0
YDL071C	YDL071C	4	332281	332656	-	CACTCTGTGGTGCTGCCAGTAAAGCAGAATGTGCGTGTCTTGTATCCATG	CTGTTCACCCTCTATGCGTAAACACTTTGCGCGTTTCTCCCTTTCTCTTT	CTAGCTAAAAAAAGAAAAAGGCGAAAAAGAGTGCCACGTCAACAACGCTA	CACTCTGTGGTGCTGCCAGTAAAGCAGAATGTGCGTGTCTTGTATCCATGCGGATCCCCGGGTTAATTAA	CTGTTCACCCTCTATGCGTAAACACTTTGCGCGTTTCTCCCTTTCTCTTTCGGATCCCCGGGTTAATTAA	CTAGCTAAAAAAAGAAAAAGGCGAAAAAGAGTGCCACGTCAACAACGCTAGAATTCGAGCTCGTTTAAAC	1	YDL070W	1	YDL070W	0
YDL070W	BDF2	4	332640	334557	+	CGGAAAAAGTGAAACAAACAGATTGAGCGAAATAAACCTCGGCGGCTATG	ATTCCGATTCTGAAGAAGACAGTAGTGATAGTAGCGACAGTGACAGTGAT	TTCTTTTCTTTTTTTCCTTAATTAGGGCATGAAGCCCATTTCGATTGTTA	CGGAAAAAGTGAAACAAACAGATTGAGCGAAATAAACCTCGGCGGCTATGCGGATCCCCGGGTTAATTAA	ATTCCGATTCTGAAGAAGACAGTAGTGATAGTAGCGACAGTGACAGTGATCGGATCCCCGGGTTAATTAA	TTCTTTTCTTTTTTTCCTTAATTAGGGCATGAAGCCCATTTCGATTGTTAGAATTCGAGCTCGTTTAAAC	1	YDL071C	1	YDL071C	0
YDL069C	CBS1	4	334738	335427	-	TTTCTTTATAGCAGGATAAAAGAATAAATCAGATAATGAATCTCGACATG	TTATAAAAACTATATGCATACCTCTAATTAATTACCATTTGCGTAAATCA	AAATAAAACAAAGGGATAACGGACAAAAAGGCATCGTTTCTTTTGTACTA	TTTCTTTATAGCAGGATAAAAGAATAAATCAGATAATGAATCTCGACATGCGGATCCCCGGGTTAATTAA	TTATAAAAACTATATGCATACCTCTAATTAATTACCATTTGCGTAAATCACGGATCCCCGGGTTAATTAA	AAATAAAACAAAGGGATAACGGACAAAAAGGCATCGTTTCTTTTGTACTAGAATTCGAGCTCGTTTAAAC	1	YDL068W	1	YDL068W	0
YDL068W	YDL068W	4	335117	335446	+	TGAAATTCGTAAACGTTATTGTAAGCATCTTATTAATTTCCAAGTGAATG	CAACAGTAGTTGCAAACACTTTTGTCCTCAACATGTCGAGATTCATTATC	TGCTTCTATTCTTCTATGGTTTCTTTATAGCAGGATAAAAGAATAAATCA	TGAAATTCGTAAACGTTATTGTAAGCATCTTATTAATTTCCAAGTGAATGCGGATCCCCGGGTTAATTAA	CAACAGTAGTTGCAAACACTTTTGTCCTCAACATGTCGAGATTCATTATCCGGATCCCCGGGTTAATTAA	TGCTTCTATTCTTCTATGGTTTCTTTATAGCAGGATAAAAGAATAAATCAGAATTCGAGCTCGTTTAAAC	1	YDL069C	1	YDL069C	0
[truncated: 5,725 more rows]

## Sheet: ncRNA
Species: Saccharomyces cerevisiae
Strain: Y55
[truncated: 447 more rows]

## Sheet: tRNA
Species: Saccharomyces cerevisiae
Strain: Y55
[truncated: 276 more rows]
